# Supplementary material for: Enriched-GWAS and Transcriptome Analysis to Refine and Characterize a Major QTL for Anaerobic Germination Tolerance in Rice
Source: Int J Mol Sci. 2021 Apr 24;22(9):4445. doi: 10.3390/ijms22094445 (PMC8123023; doi:10.3390/ijms22094445)
Supplement: Supplementary file 1 [file ijms-22-04445-s001.zip]

Archive with 13 entries (13 files):
- Suppl_File1.xlsx
- Suppl_File10.xlsx
- Suppl_File11.xlsx
- Suppl_File12.xls
- Suppl_File2.xlsx
- Suppl_File3.xlsx
- Suppl_File4.xlsx
- Suppl_File5.xlsx
- Suppl_File6.xlsx
- Suppl_File7.xlsx
- Suppl_File8.xlsx
- Suppl_File9.xlsx
- Supplemetary Figures_17April2021.pdf
