# Supplementary material for: Enriched-GWAS and Transcriptome Analysis to Refine and Characterize a Major QTL for Anaerobic Germination Tolerance in Rice
Source: Int J Mol Sci. 2021 Apr 24;22(9):4445. doi: 10.3390/ijms22094445 (PMC8123023; doi:10.3390/ijms22094445)
Supplement: Supplementary file 1 [file ijms-22-04445-s001.zip › Suppl_File1.xlsx]

## Sheet: Stat_WGS
Supplementary File 1. Summary statistics of the whole genome sequencing (WGS) of AG donors and recurrent parent.
Parameter	Ma-Zhan Red (count)	Ma-Zhan Red (%)	IR42 (count)	IR42 (%)	Kharshu 80Aa (count)	Kharshu 80A (%)	Khao Hlan On (count)	Khao Hlan On (%)	Nanhia (count)	Nanhi (%)	TKM9 (count)	TKM9 (%)
Total raw reads	86102944	100	45784570	100	47431624	100	156947986	100	45900758	100	47188724	100
Total mapped reads	83240247	96.7	44566996	97.3	45496364	95.92	148290681	94.48	43966228	95.79	45135667	95.65
Unmapped reads	2862697	3.3	1217574	2.7	1318658	2.78	8657305	5.52	1934530	4.21	2053057	4.35
Paired reads	66340376	77	35181268	76.8	36487682	76.93	118478742	75.49	35595588	77.55	35690812	75.63
aKharsu 80A and TKM9 total read counts are taken from FASTQ data
