# Supplementary material for: Enriched-GWAS and Transcriptome Analysis to Refine and Characterize a Major QTL for Anaerobic Germination Tolerance in Rice
Source: Int J Mol Sci. 2021 Apr 24;22(9):4445. doi: 10.3390/ijms22094445 (PMC8123023; doi:10.3390/ijms22094445)
Supplement: Supplementary file 1 [file ijms-22-04445-s001.zip › Suppl_File2.xlsx]

## Sheet: distance
Table S2. Identify by state (IBS) distance matrix based on AG2 region
Taxa	IR42	IR64	KHO	KZ	MR	NN	TK
IR42	0	0.217605	0.224946	0.412074	0.334155	0.400329	0.310402
IR64	0.217605	0	0.255597	0.545242	0.399325	0.533222	0.396581
KHO	0.224946	0.255597	0	0.507229	0.373641	0.498029	0.307177
KZ	0.412074	0.545242	0.507229	0	0.481841	0.104755	0.49995
MR	0.334155	0.399325	0.373641	0.481841	0	0.440903	0.354245
NN	0.400329	0.533222	0.498029	0.104755	0.440903	0	0.462651
TK	0.310402	0.396581	0.307177	0.49995	0.354245	0.462651	0
