# Supplementary material for: Enriched-GWAS and Transcriptome Analysis to Refine and Characterize a Major QTL for Anaerobic Germination Tolerance in Rice
Source: Int J Mol Sci. 2021 Apr 24;22(9):4445. doi: 10.3390/ijms22094445 (PMC8123023; doi:10.3390/ijms22094445)
Supplement: Supplementary file 1 [file ijms-22-04445-s001.zip › Suppl_File3.xlsx]

## Sheet: Enriched_panel
Supplementary File 3. List of accessions in the enriched AG2 panel.
ID	Name:ACCESSION	IRIS ID	SUBPOPULATION	COUNTRY
1535	MAYATAUNG::IRGC 95957-1	IRIS 313-12268	indx	Myanmar
924	VAIKATHARYAN::IRGC 52805-1	IRIS 313-11461	ind2	India
1337	I 814::IRGC 76028-1	IRIS 313-11944	ind1A	Nepal
313	KALABAIL::IRGC 25877-1	IRIS 313-9391	ind2	Bangladesh
2361	GANDHISAIL::IRGC 43826-2	IRIS 313-11321	ind2	Bangladesh
280	KHAO MON::IRGC 60764-1	IRIS 313-9182	indx	Myanmar
1139	LUO SI ZHAN::IRGC 67211-1	IRIS 313-11728	ind3	China
82	POKKALI::IRGC 8948-1	IRIS 313-8244	ind2	Sri Lanka
2064	PORANG::IRGC 27577-1	IRIS 313-11019	aus	Bangladesh
462	Na souan::IRGC 11889-1	IRIS 313-8638	ind3	Lao People's Democratic Republic
908	ARC 18533::IRGC 51756-1	IRIS 313-11443	indx	India
2378	LOBANG (WHITE)::IRGC 44548-2	IRIS 313-11338	indx	Philippines
1354	IN TOK::IRGC 77071-1	IRIS 313-11961	ind3	Thailand
264	PAI CHUEH CHIU LIU::IRGC 34259-1	IRIS 313-9065	ind1A	China
1255	CHI GU::IRGC 71988-1	IRIS 313-11854	ind1A	China
1156	AI JIAO AO FAN ZI::IRGC 67871-1	IRIS 313-11744	indx	China
1090	JIN HUA 258::IRGC 63670-1	IRIS 313-11665	ind1A	China
1569	KHIE TOM::IRGC 95601-1	IRIS 313-12263	ind3	Lao People's Democratic Republic
545	SOLOMON RED RICE::IRGC 50950-1	IRIS 313-9944	indx	Solomon Islands
1536	SHWEWARHNAN::IRGC 96053-1	IRIS 313-12269	indx	Myanmar
1437	AI JIAO ZI::IRGC 82255-1	IRIS 313-12057	indx	China
413	MEI FENG 9::IRGC 63735-1	IRIS 313-10168	indx	China
347	HOLDI GIRA::IRGC 31801-1	IRIS 313-9617	ind2	Bangladesh
281	XI GAN JING REN::IRGC 60035-1	IRIS 313-9184	indx	China
1272	E ZI 110::IRGC 70201-1	IRIS 313-11799	ind1A	China
215	BAZAIL::IRGC 27526-1	IRIS 313-8717	indx	Bangladesh
1652	DONGREM::IRGC 6688-1	IRIS 313-10544	ind2	India
1619	PACHCHAIPERUMAL 2462-11::IRGC 3474-1	IRIS 313-10476	ind2	Sri Lanka
2098	AUS 233::IRGC 29036-1	IRIS 313-11050	aus	Bangladesh
1074	NCS 901 A::IRGC 62568-1	IRIS 313-11650	ind2	India
496	ES 21::IRGC 56171-1	IRIS 313-8571	ind3	Tanzania
430	LIU XU::IRGC 109232-1	IRIS 313-10239	indx	China
364	LEAD::IRGC 5805-1	IRIS 313-9791	indx	Malawi
1289	MAHA CHAI::IRGC 73517-1	IRIS 313-11899	indx	Thailand
1256	DA GUAN YIN ZHAN::IRGC 72006-1	IRIS 313-11855	ind1A	China
1190	N'YA NOFF::IRGC 69749-1	IRIS 313-11786	ind3	Gambia
1157	AN FU ZHAN::IRGC 67878-1	IRIS 313-11745	ind1A	China
133	XITTO::IRGC 6671-1	IRIS 313-8622	ind2	India
1603	NASAENG::IRGC 107819-1	IRIS 313-12355	indx	Lao People's Democratic Republic
1537	TOAM JUM::IRGC 96077-1	IRIS 313-12270	indx	Myanmar
926	KATSIYAM TABAO::IRGC 52855-1	IRIS 313-11463	indx	Philippines
1719	PHOU SAO LEUM NYANG::IRGC 11570-2	IRIS 313-10651	indx	Lao People's Democratic Republic
183	SAN CHIAO TSWEN::IRGC 1565-1	IRIS 313-8380	ind1A	China
1141	QING ER XIAO 2::IRGC 67255-1	IRIS 313-11730	indx	China
1108	PLAWNG SAENG::IRGC 64595-1	IRIS 313-11685	ind3	Thailand
1521	WUGU::IRGC 93479-1	IRIS 313-12237	ind1A	China
1934	ARC 12413::IRGC 22044-1	IRIS 313-10881	admix	India
398	EX MARABA GURUKU::IRGC 69582-1	IRIS 313-10047	ind1A	Nigeria
910	NAPDAI::IRGC 52009-1	IRIS 313-11446	ind2	India
332	ARC 11857::IRGC 40972-1	IRIS 313-9560	indx	India
1356	KARANGI::IRGC 77128-1	IRIS 313-11963	aus	India
266	BHOJON KOLPO::IRGC 31727-1	IRIS 313-9067	ind2	Bangladesh
1257	DA HEI GU::IRGC 72009-1	IRIS 313-11856	ind1A	China
200	ARC 11901::IRGC 21727-1	IRIS 313-8585	indx	India
1158	E 2070::IRGC 67981-1	IRIS 313-11746	ind1A	China
1637	TAICHUNG WOO GEN 2::IRGC 5525-1	IRIS 313-10515	ind1A	Taiwan
1092	LUO AI ZAO 3::IRGC 63730-1	IRIS 313-11667	ind1A	China
547	ALTAMIRA 9::IRGC 116953-1	IRIS 313-10257	indx	Nicaragua
2	SANHUANGZHAN NO 2::G1	IRIS 313-15897	indx
993	NGA CHAN HMWE::IRGC 58146-1	IRIS 313-11546	indx	Myanmar
1505	SALA::IRGC 90457-1	IRIS 313-12207	indx	Lao People's Democratic Republic
1472	KHAO PA::IRGC 85972-1	IRIS 313-12130	ind3	Lao People's Democratic Republic
1439	LIANG GUANG::IRGC 78551-1	IRIS 313-11986	ind1A	China
2430	NAH MOI::IRGC 48353-2	IRIS 313-11390	ind3	Thailand
415	YA NONG ZAO 4::IRGC 63908-1	IRIS 313-10171	ind1A	China
382	KULA KARUPPAN::IRGC 55328-1	IRIS 313-9968	indx	Sri Lanka
2397	CN 44-40-7::IRGC 45368-1	IRIS 313-11355	indx	India
828	SAMBALA MALO::C1	IRIS 313-7770	ind1B
250	KALU ILANKALAYAN::IRGC 36270-1	IRIS 313-8968	ind2	Sri Lanka
1241	DU GEN CHUAN::IRGC 70083-1	IRIS 313-11796	ind1A	China
1175	PJ 110::IRGC 68981-1	IRIS 313-11763	indx	Cameroon
1142	QING TAI AI::IRGC 67273-1	IRIS 313-11731	indx	China
2100	AUS 278::IRGC 29068-1	IRIS 313-11052	aus	Bangladesh
977	ZO::IRGC 56914-1	IRIS 313-11528	ind3	Cote d'Ivoire
2348	ARC 15862::IRGC 43242-1	IRIS 313-11309	indx	India
2381	MINDANAO::IRGC 44642-2	IRIS 313-11341	ind3	Philippines
1258	DA LI BAI 63::IRGC 72016-1	IRIS 313-11857	ind1A	China
1737	ARC 10581::IRGC 12514-1	IRIS 313-10671	indx	India
201	PLI KHAO::IRGC 64596-1	IRIS 313-8586	ind3	Thailand
1159	E 4197::IRGC 68004-1	IRIS 313-11747	indx	China
614	IR 73690-7-2-1-1-3-2-2-1::IRGC 117384-1	IRIS 313-10380	aus	Philippines
1093	RONG DAO 4::IRGC 63820-1	IRIS 313-11668	ind1A	China
548	FONAIAP 2::IRGC 116985-1	IRIS 313-10268	indx	Venezuela
1506	CHAM TON::IRGC 90600-1	IRIS 313-12210	indx	Viet Nam
2018	IH PEN SHIM MING::IRGC 26067-1	IRIS 313-10968	ind1A	Brazil
482	IR 67518-B-11-1-B::IRGC 117380-1	IRIS 313-10371	indx	Philippines
961	K 1074::IRGC 55017-1	IRIS 313-11505	ind2	India
383	RACE PERUMAL::IRGC 55347-1	IRIS 313-9970	ind2	Sri Lanka
1886	PERUNEL 0-69-18::IRGC 19581-1	IRIS 313-10835	ind2	India
1341	HOU LU BAI::IRGC 76582-1	IRIS 313-11948	ind1A	China
1820	BANDI::IRGC 17214-1	IRIS 313-10762	ind3	Indonesia
1308	MUDALIGA WEE::IRGC 74706-1	IRIS 313-11916	ind2	Sri Lanka
1242	NIAW NARAI::IRGC 71353-1	IRIS 313-11841	ind3	Thailand
1176	P 41::IRGC 68987-1	IRIS 313-11764	ind3	Liberia
1143	QING ZAO 3::IRGC 67281-1	IRIS 313-11732	ind1A	China
1011	SATHIYA::IRGC 59225-1	IRIS 313-11568	ind1A	Nepal
1259	DA TIE ZHAN::IRGC 72029-1	IRIS 313-11858	ind1A	China
1771	PERIYA VELLAI::IRGC 15475-1	IRIS 313-10717	ind2	Sri Lanka
2184	NGALONGYI::IRGC 33479-2	IRIS 313-11137	indx	Myanmar
1160	GAO JIAO YING GAN ZHAN::IRGC 68053-1	IRIS 313-11748	indx	China
1127	SOSSOKA::IRGC 66478-1	IRIS 313-11716	ind3	Guinea
2085	AI NAN TSAO 39::IRGC 28461-2	IRIS 313-11038	ind1A	China
1540	AIJIAONANTE::IRGC 96974-1	IRIS 313-12273	ind1A	China
995	TAUNG LWIN::IRGC 58222-1	IRIS 313-11548	indx	Myanmar
417	GAO JIAO BAI::IRGC 68047-1	IRIS 313-10178	ind1A	China
384	SSANGDUJO::IRGC 55632-1	IRIS 313-9976	ind1A	Korea, Republic of
2399	CR 579-1-3::IRGC 45443-2	IRIS 313-11357	ind1B	India
830	IR 19746-28-2-2::IRGC 78072-C1	IRIS 313-7685	ind1B	Philippines
1342	LIU HE XI HE::IRGC 76661-1	IRIS 313-11949	ind1A	China
1854	MURUNGA::IRGC 15428-1	IRIS 313-10716	ind2	Sri Lanka
318	PAMAH S 18::IRGC 61322-1	IRIS 313-9451	indx	Thailand
285	CHI SHENG TAO::IRGC 4606-1	IRIS 313-9204	ind1A	China
1276	AI DA::IRGC 72567-1	IRIS 313-11876	ind1A	China
2333	ARC 11397::IRGC 42664-1	IRIS 313-11295	admix	India
252	ARC 18112::IRGC 42274-1	IRIS 313-8982	indx	India
2201	AC 74::IRGC 33967-1	IRIS 313-11152	ind1A	India
1012	GENG 77-4::IRGC 59321-1	IRIS 313-11570	indx	China
1491	PA PHA EA::IRGC 87751-1	IRIS 313-12161	ind3	Cambodia
434	IA CUBA 17::IRGC 116990-1	IRIS 313-10271	indx	Cuba
401	TOC 5430::IRGC 70487-1	IRIS 313-10054	indx	Panama
1359	GUANG XUAN LIU HAO::IRGC 77341-1	IRIS 313-11965	ind1A	China
335	NX 3533::IRGC 63796-1	IRIS 313-9570	indx	China
814	WAS 33-B-B-15-1-4-5::C1	IRIS 313-7826	ind1B
1805	LUA DUC::IRGC 16718-1	IRIS 313-10748	indx	Viet Nam
1260	DONG DU::IRGC 72037-1	IRIS 313-11859	ind1A	China
1739	ARC 10843::IRGC 12653-1	IRIS 313-10673	aus	India
1227	LALI GURMATIA::IRGC 70854-1	IRIS 313-11828	ind2	India
1128	JATI MANI::IRGC 66565-1	IRIS 313-11717	indx	Indonesia
1640	KHAYANGYA D 34-181::IRGC 5861-2	IRIS 313-10518	indx	Myanmar
2086	KWANG LU AI 4::IRGC 28480-2	IRIS 313-11039	ind1A	China
517	SIMET 2::IRGC 25734-1	IRIS 313-8833	ind3	Indonesia
1475	TAP KHOUAY::IRGC 86373-1	IRIS 313-12133	ind3	Lao People's Democratic Republic
1343	MI GU::IRGC 76687-1	IRIS 313-11950	ind1A	China
831	WAS 21-B-B-20-4-3-3::C1	IRIS 313-7824	ind1B
1277	AN NAN ZAO::IRGC 72576-1	IRIS 313-11877	ind1A	China
253	KHAO' HAWM::IRGC 78257-1	IRIS 313-8985	ind3	Thailand
187	CHANG LE SAN SHU ZAO::IRGC 63561-1	IRIS 313-8433	ind1A	China
1145	SI CHAO 1::IRGC 67335-1	IRIS 313-11734	ind1A	China
2103	AUS 299::IRGC 29087-1	IRIS 313-11055	aus	Bangladesh
1360	QI GU::IRGC 77381-1	IRIS 313-11966	ind1A	China
303	ARC 10799::IRGC 12631-1	IRIS 313-9313	indx	India
1261	GUA PAI GU::IRGC 72078-1	IRIS 313-11860	ind1A	China
1740	ARC 10846::IRGC 12656-2	IRIS 313-10674	indx	India
1129	DAW NOK KAEN::IRGC 65548-1	IRIS 313-11700	ind3	Thailand
72	MUTTU SAMBA::IRGC 36333-1	IRIS 313-9039	ind2	Sri Lanka
1542	EA KHAW NGAN::IRGC 95176-2	IRIS 313-12260	ind3	Lao People's Democratic Republic
419	DA NUO (ZHAN)::IRGC 72025-1	IRIS 313-10189	ind1A	China
898	MR 136-1::IRGC 50707-1	IRIS 313-11433	ind1A	India
1377	CHON::IRGC 78776-1	IRIS 313-11991	ind3	Lao People's Democratic Republic
353	TAITUNG WOO LI::IRGC 111-1	IRIS 313-9705	ind1A	Taiwan
1344	MIAO ZHAN::IRGC 76691-1	IRIS 313-11951	ind1A	China
320	TSAO SHENG LI 1::IRGC 1309-1	IRIS 313-9469	ind1A	China
254	ARC 10754::IRGC 12603-1	IRIS 313-8986	indx	India
1278	BAI RI XIAN::IRGC 72588-1	IRIS 313-11878	ind1A	China
122	CO 39	IRIS 313-8265	indx	India
1146	YI LI ZHONG::IRGC 67382-1	IRIS 313-11735	indx	China
2451	DONRADAO::IRGC 49604-1	IRIS 313-11411	ind2	Brazil
370	MODDAI KARUPPAN::IRGC 15465-1	IRIS 313-9862	ind2	Sri Lanka
1873	UNGGAS::IRGC 19176-2	IRIS 313-10822	ind3	Indonesia
1262	E ZI 100::IRGC 70192-1	IRIS 313-11798	ind1B	China
1741	ARC 10905::IRGC 12669-1	IRIS 313-10675	indx	India
1708	HAM MOON::IRGC 9135-2	IRIS 313-10614	indx	Hong Kong
1163	M 6034-1::IRGC 68193-1	IRIS 313-11752	ind1A	China
1130	DAWK PUT::IRGC 66699-1	IRIS 313-11719	ind3	Thailand
40	CHUA DAU::IRGC 4785-1	IRIS 313-9555	indx	China
1064	NCS 458::IRGC 62290-1	IRIS 313-11640	ind2	India
1031	BHAINSA MUNDARIYA::IRGC 60893-1	IRIS 313-11596	indx	India
998	IR 3839-1::IRGC 55946-1	IRIS 313-11516	indx	Philippines
1989	BANDANG BUNGKUAKLAN::IRGC 24697-2	IRIS 313-10942	ind3	Indonesia
420	DENG DENG QI::IRGC 72036-1	IRIS 313-10190	ind1A	China
354	TAIPEI WOO CO::IRGC 112-1	IRIS 313-9706	ind1A	Taiwan
1312	GI TAH::IRGC 74883-1	IRIS 313-11920	indx	Thailand
255	BANIKAT::IRGC 67720-1	IRIS 313-8988	ind2	India
2303	ARC 13591::IRGC 41177-2	IRIS 313-11260	indx	India
1626	CE IN TSAN::IRGC 4362-1	IRIS 313-10497	ind1A	China
2105	AUS 301::IRGC 29089-1	IRIS 313-11056	aus	Bangladesh
1081	B 3913 B 16-20 ST 28::IRGC 63099-1	IRIS 313-11656	indx	Indonesia
1048	JUAN YE LAI::IRGC 61825-1	IRIS 313-11622	ind1A	China
1560	LOUK PASOM::IRGC 98136-1	IRIS 313-12297	indx	Lao People's Democratic Republic
1015	GAO LIANG ZAO::IRGC 59563-1	IRIS 313-11573	indx	China
2386	WAGWAG::IRGC 44802-1	IRIS 313-11345	indx	Philippines
1362	ZHAO DAN AI::IRGC 77422-1	IRIS 313-11968	ind1A	China
1808	LUA CHUM::IRGC 16840-1	IRIS 313-10751	indx	Viet Nam
1230	DA GU AI 7::IRGC 70075-1	IRIS 313-11795	ind1A	China
1709	SIDALI::IRGC 9567-1	IRIS 313-10623	aus	Nepal
1164	XIANG CHANG ZAO::IRGC 68268-1	IRIS 313-11753	ind1A	China
1131	DAW 85::IRGC 66704-1	IRIS 313-11720	ind3	Thailand
1610	CI 7061::IRGC 968-1	IRIS 313-10449	ind1A	China
1065	NCS 477::IRGC 62299-1	IRIS 313-11641	ind2	India
1511	NOON SOUNG::IRGC 91956-1	IRIS 313-12224	ind3	Lao People's Democratic Republic
421	MIN KE ZHAN::IRGC 72230-1	IRIS 313-10191	ind1A	China
1346	SAN BAO GU::IRGC 76732-1	IRIS 313-11953	ind1A	China
834	SOM CAU 70 A::IRGC 8227-C1	IRIS 313-7778	indx
1280	LIU TIAO XIAN::IRGC 72758-1	IRIS 313-11881	ind1A	China
1214	KARILETYONE::IRGC 70745-1	IRIS 313-11816	indx	Myanmar
1115	CHIAYI WU-K'O::IRGC 64974-1	IRIS 313-11692	ind1A	Taiwan
1627	TON ROO SHUN::IRGC 4572-1	IRIS 313-10502	ind1A	China
25	KHARSU 80::IRGC 28016-1	IRIS 313-8398	aus	Pakistan
1528	DAMNOUEB PHDAU PEN::IRGC 94176-1	IRIS 313-12249	ind3	Cambodia
1974	SUGA PANKHA::IRGC 24054-1	IRIS 313-10927	aus	Nepal
1908	ARC 10825::IRGC 21082-1	IRIS 313-10857	admix	India
1396	YAN ZHAN::IRGC 79740-1	IRIS 313-12010	ind1A	China
306	CHIH SHEN LI::IRGC 1306-1	IRIS 313-9324	ind1A	China
1264	HENG YE ZAO::IRGC 72092-1	IRIS 313-11862	ind1A	China
240	KURULUTUDU::IRGC 36304-1	IRIS 313-8925	ind2	Sri Lanka
1644	D 204-1::IRGC 6445-1	IRIS 313-10534	aus	India
1132	GAEW DAENG::IRGC 66707-1	IRIS 313-11721	ind3	Thailand
1611	CHAN KU::IRGC 1069-1	IRIS 313-10450	ind1A	China
1099	E MOOM::IRGC 64291-1	IRIS 313-11676	ind3	Thailand
967	A 69-1::IRGC 55305-1	IRIS 313-11510	indx	Sri Lanka
389	GARURA::IRGC 64111-1	IRIS 313-10007	indx	Nepal
1281	MAN TIAN QING::IRGC 72776-1	IRIS 313-11882	ind1A	China
257	SRAU SENG::IRGC 30290-1	IRIS 313-8996	ind3	Viet Nam
191	ARC 18597::IRGC 43299-1	IRIS 313-8453	indx	India
2206	T KAUG PAO::IRGC 34182-1	IRIS 313-11157	ind1A	Taiwan
1628	HA GOO::IRGC 4577-1	IRIS 313-10503	ind1A	China
92	IR 53650-2B-10-1-2-1::IRGC 117379-1	IRIS 313-10359	indx	Philippines
1050	ANADI WHITE::IRGC 61897-1	IRIS 313-11624	ind1A	Nepal
538	RTS 16::IRGC 8235-1	IRIS 313-9429	indx	Viet Nam
373	CHANDINA::IRGC 36420-1	IRIS 313-9917	ind1B	Sri Lanka
2388	WAGWAG RAOIS::IRGC 44805-1	IRIS 313-11347	indx	Philippines
340	ASHI BINNI::IRGC 77216-1	IRIS 313-9594	indx	Bangladesh
1843	SUDU KARAYAL::IRGC 15348-1	IRIS 313-10715	ind2	Sri Lanka
208	PAI YI PING::IRGC 1368-1	IRIS 313-8645	ind1A	China
1199	JIE CAO ZHAN::IRGC 70305-1	IRIS 313-11802	ind1A	China
1100	E NAWN KHAO::IRGC 64293-1	IRIS 313-11677	ind3	Thailand
1612	LING TA 150::IRGC 1106-1	IRIS 313-10452	ind1A	China
456	ARC 15091::IRGC 43048-1	IRIS 313-8332	indx	India
423	BAI HE::IRGC 76438-1	IRIS 313-10211	ind1A	China
1414	GAO JIAO HONG::IRGC 80920-1	IRIS 313-12033	ind1A	China
357	AI ZI HUNG::IRGC 51255-1	IRIS 313-9723	ind1A	China
2405	KHEJURTHUPI::IRGC 46137-2	IRIS 313-11363	ind2	India
1348	YE DA GU::IRGC 76834-1	IRIS 313-11955	ind1A	China
258	LONG KHI KRAI::IRGC 64490-1	IRIS 313-9006	ind3	Thailand
1282	TIAN DAO DAO::IRGC 72837-1	IRIS 313-11884	ind1A	China
192	LAI YIP ZIM::IRGC 4955-1	IRIS 313-8454	ind1A	Taiwan
1216	LETYONE::IRGC 70753-1	IRIS 313-11818	indx	Myanmar
2273	R 146::IRGC 38606-1	IRIS 313-11232	aus	India
126	ARC 5840::IRGC 12144-1	IRIS 313-9424	indx	India
2207	NAN ERH AI 5::IRGC 34255-1	IRIS 313-11158	ind1A	China
1117	CHING LIU::IRGC 65018-1	IRIS 313-11694	indx	Taiwan
1629	HSIEH DAU::IRGC 4727-1	IRIS 313-10504	ind1A	China
1051	HOLDIGANTHI::IRGC 61105-1	IRIS 313-11607	ind2	India
1563	NGAM KON DAM::IRGC 98486-1	IRIS 313-12300	indx	Lao People's Democratic Republic
952	AR 133::IRGC 53942-1	IRIS 313-11493	indx	India
1910	ARC 10939::IRGC 21150-2	IRIS 313-10859	indx	India
374	IRI 339::IRGC 46956-1	IRIS 313-9922	ind1B	Korea, Republic of
1398	ZAO LENG SHUI ZHAN::IRGC 79756-1	IRIS 313-12012	ind1A	China
820	IR 2344-P1 PB-9-3-2B::IRGC 39317-C1	IRIS 313-7690	indx	Philippines
1332	KAMPTI::IRGC 75626-1	IRIS 313-11939	ind3	Burkina Faso
1811	KH 998::IRGC 16948-2	IRIS 313-10754	indx	India
242	PATISAIL::IRGC 37562-1	IRIS 313-8932	ind3	Bangladesh
209	PERUNEL::IRGC 63113-1	IRIS 313-8647	ind2	India
2158	KAL SHULI::IRGC 31665-2	IRIS 313-11113	ind2	Bangladesh
1134	DISSIGBE::IRGC 66916-1	IRIS 313-11723	ind2	Guinea
2059	HANPA::IRGC 27547-2	IRIS 313-11015	aus	Bangladesh
1002	GORIA::IRGC 58736-1	IRIS 313-11557	aus	Bangladesh
424	BA BAI GU::IRGC 79580-1	IRIS 313-10221	indx	China
936	LOCAL::IRGC 53300-1	IRIS 313-11478	ind2	India
391	BOHOTO BALOOCHESTAN::IRGC 66237-1	IRIS 313-10016	indx	Iran
358	NAN TE HAO::IRGC 59797-1	IRIS 313-9727	ind1A	China
2439	RAYDHAN 1::IRGC 49127-2	IRIS 313-11399	indx	Bangladesh
2340	ARC 14899::IRGC 43016-1	IRIS 313-11302	indx	India
325	KORASISI::IRGC 5285-1	IRIS 313-9505	ind1A	Philippines
292	YONG JIN ZAO 3::IRGC 70441-1	IRIS 313-9253	ind1A	China
1283	YANG WAN XIAN::IRGC 72886-1	IRIS 313-11885	ind1A	China
2307	ARC 13919::IRGC 41313-2	IRIS 313-11263	indx	India
2142	THAO LOUANG::IRGC 29688-2	IRIS 313-11081	ind3	Lao People's Democratic Republic
1118	HSIN-T'AO YUAN CHING YU::IRGC 65074-1	IRIS 313-11695	ind1A	Taiwan
1019	LANG QIAN CHE::IRGC 59730-1	IRIS 313-11577	ind1A	China
375	KN 1 B 361-1-8-6-9::IRGC 46974-1	IRIS 313-9924	indx	Korea, Republic of
2423	CHIEM NGAN::IRGC 47488-1	IRIS 313-11383	indx	Viet Nam
2357	SI RANTING::IRGC 43645-2	IRIS 313-11317	ind3	Indonesia
1267	JIANG ER ZAO::IRGC 72152-1	IRIS 313-11866	ind1A	China
1135	KONYAN::IRGC 66931-1	IRIS 313-11724	ind3	Guinea
557	MAE MAI LUD NI::IRGC 66065-1	IRIS 313-9062	ind3	Thailand
970	CHATO::IRGC 55825-1	IRIS 313-11513	ind1B	Ecuador
425	TONG GU HONG::IRGC 81026-1	IRIS 313-10226	indx	China
904	MERLE::GERVEX 1685-C1	IRIS 313-8215	indx
2374	ARC 14756::IRGC 41736-1	IRIS 313-11272	aus	India
359	BA SHI ZAO::IRGC 67903-1	IRIS 313-9730	ind1A	China
1350	DAW LUEY 4-3::IRGC 76929-1	IRIS 313-11957	indx	Thailand
260	KAM PAI::IRGC 78245-1	IRIS 313-9019	ind3	Thailand
1251	E ZI 32::IRGC 70127-1	IRIS 313-11797	ind1A	China
1730	KAHATAWEE::IRGC 12004-1	IRIS 313-10662	ind2	Sri Lanka
1218	PAKISTANHMWE::IRGC 70763-1	IRIS 313-11820	ind3	Myanmar
128	NAZIRA SAIL::IRGC 77284-1	IRIS 313-9696	indx	Bangladesh
1152	UGAGA::IRGC 67604-1	IRIS 313-11740	indx	Ghana
1565	LG 4153::IRGC 98528-1	IRIS 313-12302	ind3	Lao People's Democratic Republic
508	T 315::IRGC 54792-1	IRIS 313-8727	ind2	India
987	HOE PHAR THAE::IRGC 57907-1	IRIS 313-11541	indx	Myanmar
442	INIAP 10::IRGC 117000-1	IRIS 313-10314	indx	Ecuador
2424	CHIEM TONG NHAT 1::IRGC 47496-1	IRIS 313-11384	indx	Viet Nam
921	KARAHANI::IRGC 52664-1	IRIS 313-11458	aus	India
343	RPA 5929 (K 45)::IRGC 33963-1	IRIS 313-9604	indx	India
1301	YU HE HONG::IRGC 74266-1	IRIS 313-11910	indx	China
2325	ARC 18434::IRGC 42429-2	IRIS 313-11288	indx	India
244	FU ZAO XIAN::IRGC 63619-1	IRIS 313-8940	ind1A	China
1268	KE SHU BAI::IRGC 72183-1	IRIS 313-11867	ind1A	China
1235	E NOI NAH::IRGC 71138-1	IRIS 313-11835	indx	Thailand
1747	KHAN THAI DO::IRGC 12990-1	IRIS 313-10681	ind3	Lao People's Democratic Republic
178	BAT DO::IRGC 7014-1	IRIS 313-8341	indx	Viet Nam
1202	XI HONG GU::IRGC 70416-1	IRIS 313-11805	ind1A	China
2160	KALA MUNA::IRGC 31832-2	IRIS 313-11115	ind2	Bangladesh
1615	P 168::IRGC 1354-1	IRIS 313-10458	ind1A	China
2127	LAI NOK KHA::IRGC 29604-2	IRIS 313-11076	ind3	Lao People's Democratic Republic
1070	NCS 766::IRGC 62478-1	IRIS 313-11645	ind2	India
1004	BANGLA::IRGC 58876-1	IRIS 313-11561	ind2	Nepal
2028	MATI CHAL::IRGC 26399-2	IRIS 313-10977	ind2	Bangladesh
1384	HSINCHU AI CHIO CHIENG::IRGC 78182-1	IRIS 313-11980	ind1A	Taiwan
261	LEUANG CHAIYAPHUM::IRGC 78266-1	IRIS 313-9020	ind3	Thailand
162	ARAURE 1::IRGC 116956-1	IRIS 313-10289	ind1B	Venezuela
1153	HERATH BANDA::IRGC 67630-1	IRIS 313-11741	ind2	Sri Lanka
1566	LG 9274::IRGC 98715-1	IRIS 313-12303	indx	Lao People's Democratic Republic
1021	SHAN GU::IRGC 59870-1	IRIS 313-11579	ind1A	China
1979	CHINA 1039 MUTANT (DWARF)::IRGC 24168-2	IRIS 313-10932	ind1A	China
410	HE GU TSAO::IRGC 51302-1	IRIS 313-10154	ind1A	China
1401	DOGON IRI::IRGC 79882-1	IRIS 313-12015	ind2	Nigeria
1368	KHAU DANH::IRGC 73201-1	IRIS 313-11893	indx	Viet Nam
1335	I 41::IRGC 75927-1	IRIS 313-11943	ind1A	Nepal
311	WI BIR SHUN::IRGC 4602-1	IRIS 313-9372	ind1A	China
278	BADAL 1163::IRGC 32796-1	IRIS 313-9148	ind2	Bangladesh
1302	YUN NAN ZHAN::IRGC 74272-1	IRIS 313-11911	ind1A	China
1203	78 XUAN WU::IRGC 70475-1	IRIS 313-11806	ind1A	China
1517	TOUN::IRGC 92291-2	IRIS 313-12231	ind3	Lao People's Democratic Republic
1963	T Q QI HAYUQBABA::IRGC 23318-1	IRIS 313-10917	indx	Philippines
1897	ARC 6015::IRGC 20314-2	IRIS 313-10847	indx	India
361	I KUNG PAO::IRGC 114-1	IRIS 313-9758	ind1A	Taiwan
807	IR 1561-228-3-3::IRGC 32627-C1	IRIS 313-7684	indx	Philippines
130	HUA LI ZAO::IRGC 80950-1	IRIS 313-10224	ind1A	China
1154	KALIBAJARI::IRGC 67718-1	IRIS 313-11742	aus	India
1666	TA PAI MAUNG::IRGC 7292-1	IRIS 313-10560	ind1A	China
1088	CUN GU NUO::IRGC 63576-1	IRIS 313-11664	indx	China
543	PODIWEE::IRGC 11938-1	IRIS 313-9831	indx	Sri Lanka
1534	EA NOUAN::IRGC 95147-1	IRIS 313-12259	ind3	Lao People's Democratic Republic
1022	TAI ZHOU XIAN::IRGC 59912-1	IRIS 313-11580	indx	China
1914	ARC 11322::IRGC 21315-2	IRIS 313-10863	ind2	India
345	ARC 10594::IRGC 12524-1	IRIS 313-9609	indx	India
1270	MA WEI ZHAN::IRGC 72220-1	IRIS 313-11869	ind1A	China
213	YEBAWYIN::IRGC 33885-1	IRIS 313-8697	ind3	Myanmar
1204	R 582::IRGC 70504-1	IRIS 313-11807	indx	Colombia
1138	HONG YANG ZAO 3::IRGC 67177-1	IRIS 313-11727	ind1A	China
2063	MADISA::IRGC 27568-1	IRIS 313-11018	aus	Bangladesh
1518	TE SAN AI 2::IRGC 93355-1	IRIS 313-12232	indx	China
2443	AEB 368 RIP P TYPE ADT::IRGC 49359-2	IRIS 313-11403	indx	India
296	JHODI BIRUN::IRGC 31812-1	IRIS 313-9262	ind2	Bangladesh
1320	YAH TOW::IRGC 75191-1	IRIS 313-11927	ind3	Thailand
2311	ARC 14975::IRGC 41848-1	IRIS 313-11275	indx	India
1254	BU ZHI MING::IRGC 71971-1	IRIS 313-11853	ind1A	China
1733	ARC 6218::IRGC 12255-1	IRIS 313-10666	indx	India
1667	NAN TEO 14::IRGC 7304-1	IRIS 313-10561	ind1A	China
