# Supplementary material for: Enriched-GWAS and Transcriptome Analysis to Refine and Characterize a Major QTL for Anaerobic Germination Tolerance in Rice
Source: Int J Mol Sci. 2021 Apr 24;22(9):4445. doi: 10.3390/ijms22094445 (PMC8123023; doi:10.3390/ijms22094445)
Supplement: Supplementary file 1 [file ijms-22-04445-s001.zip › Suppl_File4.xlsx]

## Sheet: Rc vs color
Supplementary File 4. Contingency table between the indel genotype and color
		Color
Genotype encoding:	Rc Indel genotype	COLORED	WHITE
0: NB reference (Deletion)	NB (DEL)	5	215
1: heterozygous	HET	4	0
2: homozygous wildtype	WT	98	4
	With the original (not aggregated) color
	Rc indel genotype	BROWN	LIGHT_BROWN	PURPLE	RED	SPECKLED_BROWN	WHITE
	NB(DEL)	0	1	1	2	1	215
	HET	0	0	0	4	0	0
	WT	1	0	0	97	0	4

## Sheet: Corrected Indel Genotype
IRIS.ID	RcIndel_SNPSeek	Seed.coat.color.value	RcIndel_LargeSV	Corrected_IndelGT	Color	Survival_Means21	logit	Country	Region	SubpopK9
IRIS_313-9723	REF	RED	REF	1	COLORED	0.346296	-0.635359	China	EAS	ind1A
IRIS_313-11573	REF	RED	REF	2	COLORED	0.324074	-0.735111	China	EAS	indx
IRIS_313-11966	REF	RED	REF	2	COLORED	0.318519	-0.760588	China	EAS	ind1A
IRIS_313-11577	REF	RED	REF	2	COLORED	0.285185	-0.918885	China	EAS	ind1A
IRIS_313-11911	REF	RED	REF	2	COLORED	0.231481	-1.19996	China	EAS	ind1A
IRIS_313-11953	REF	BROWN	REF	2	COLORED	0.17963	-1.51886	China	EAS	ind1A
IRIS_313-11881	HET	RED	REF	1	COLORED	0.164815	-1.62283	China	EAS	ind1A
IRIS_313-10224	REF	RED	REF	2	COLORED	0.125926	-1.93747	China	EAS	ind1A
IRIS_313-11019	REF	RED	REF	2	COLORED	0.105556	-2.13697	Bangladesh	SAE	aus
IRIS_313-11232	NA	RED	REF	2	COLORED	0.0888889	-2.32728	India	SAC	aus
IRIS_313-11505	REF	RED	REF	2	COLORED	0.0888889	-2.32728	India	SAC	ind2
IRIS_313-10178	REF	RED	REF	2	COLORED	0.0796296	-2.44739	China	EAS	ind1A
IRIS_313-8727	REF	RED	REF	2	COLORED	0.0703704	-2.58101	India	SAC	ind2
IRIS_313-10673	REF	RED	REF	2	COLORED	0.0611111	-2.732	India	SAC	aus
IRIS_313-11347	REF	RED	REF	2	COLORED	0.0555556	-2.83321	Philippines	SER	indx
IRIS_313-8647	REF	RED	REF	2	COLORED	0.0351852	-3.31131	India	SAC	ind2
IRIS_313-8622	REF	RED	REF	2	COLORED	0.0277778	-3.55535	India	SAC	ind2
IRIS_313-9391	REF	RED	REF	2	COLORED	0.0259259	-3.62624	Bangladesh	SAE	ind2
IRIS_313-11818	REF	RED	REF	2	COLORED	0.0222222	-3.78419	Myanmar	SEA	indx
IRIS_313-9970	REF	RED	REF	2	COLORED	0.0222222	-3.78419	Sri Lanka	IOC	ind2
IRIS_313-9617	REF	RED	REF	2	COLORED	0.0203704	-3.87309	Bangladesh	SAE	ind2
IRIS_313-10190	REF	LIGHT_BROWN	REF	0	COLORED	0.0166667	-4.07754	China	EAS	ind1A
IRIS_313-10476	REF	RED	REF	2	COLORED	0.0166667	-4.07754	Sri Lanka	IOC	ind2
IRIS_313-11463	REF	RED	REF	2	COLORED	0.0166667	-4.07754	Philippines	SER	indx
IRIS_313-8968	REF	RED	REF	2	COLORED	0.0166667	-4.07754	Sri Lanka	IOC	ind2
IRIS_313-9862	REF	RED	REF	2	COLORED	0.0166667	-4.07754	Sri Lanka	IOC	ind2
IRIS_313-11607	REF	RED	REF	2	COLORED	0.0111111	-4.48864	India	SAC	ind2
IRIS_313-9696	REF	RED	REF	2	COLORED	0.0111111	-4.48864	Bangladesh	SAE	indx
IRIS_313-11403	REF	PURPLE	REF	0	COLORED	0.00555556	-5.18739	India	SAC	indx
IRIS_313-9067	REF	RED	REF	2	COLORED	0.00555556	-5.18739	Bangladesh	SAE	ind2
IRIS_313-12015	REF	RED	REF	2	COLORED	0.0037037	-5.59471	Nigeria	WAF	ind2
IRIS_313-10717	REF	RED	REF	1	COLORED	0	NA	Sri Lanka	IOC	ind2
IRIS_313-11115	REF	RED	REF	1	COLORED	0	NA	Bangladesh	SAE	ind2
IRIS_313-11338	REF	RED	REF	0	COLORED	0	NA	Philippines	SER	indx
IRIS_313-11541	REF	SPECKLED_BROWN	REF	0	COLORED	0	NA	Myanmar	SEA	indx
IRIS_313-9968	REF	RED	REF	0	COLORED	0	NA	Sri Lanka	IOC	indx
