# Supplementary material for: Enriched-GWAS and Transcriptome Analysis to Refine and Characterize a Major QTL for Anaerobic Germination Tolerance in Rice
Source: Int J Mol Sci. 2021 Apr 24;22(9):4445. doi: 10.3390/ijms22094445 (PMC8123023; doi:10.3390/ijms22094445)
Supplement: Supplementary file 1 [file ijms-22-04445-s001.zip › Suppl_File5.xlsx]

## Sheet: info
Supplementary 5. Detail view of the functional allele of the Rc gene in TKM9.
Demonstration of support for wildtype Rc allele in TKM9 based on alignment data
By examining individual reads overlapping the insertion site, we find 19 reads that support wild-type allele and no reads supporting reference allele
Both sheets are based on the same aligned NGS data.
Sheet	Description
1-SAM	Demonstration of support for wildtype allele based on complete alignment information from SAM file
2-tview	Interpretation of visualized alignments based on the previous sheet

## Sheet: 1-SAM
# NGS reads of TKM9 overlapping the region Chr7:6068071, in standard SAM format (https://samtools.github.io/hts-specs/)
# Rows 5-24 are taken from SAM file produced by samtools view -L RcIndel.bed TK-1.realigned.bam									Indel sequence: ACGCGAAAAGTCGG
# 19 out of 20 reads provide evidence for insertion												Comment
QNAME	FLAG	RNAME	POS	MAPQ	CIGAR	RNEXT	PNEXT	TLEN	SEQ	QUAL
HWI-D00111:192:C39DEACXX:1:2101:4051:97763_1:N:0:GCCAAT	147	Chr7	6067971	60	101M	=	6067883	-189	AGAGAATGCTCAAGAGCATCCTGATGATTGTTCCCAGTAGTCACTGCAGTTACAGGGGAGCAGAAACACCTGAATCAAGGGGCGGGAAAGGCGCAAGTGGA	CCDDDCDCDDCDDCDBADDCADDDDDDEDDEDFFFFFHFHHHEIGIGGDC@@7@JIHDGGHIGHGEEFJJIIJIIHHEIJIGGJJJIJHHHHHFFFFFCCC	NH:i:1	the read does not cover both sides of the insertion point on the reference, thus does not provide evidence of Nipponbare allele
HWI-D00111:192:C39DEACXX:1:2106:14250:52664_2:N:0:GCCAAT	83	Chr7	6067973	60	99M2S	=	6067850	-224	AGAATGCTCAAGAGCATCCTGATGATTGTTCCCAGTAGTCACTGCAGTTACAGGGGAGCAGAAACACCTGAATCAAGGGGCGGGAAAGGCGCAAGTGGAAC	DDDDDCCA>DDDDDDDDDDDDDDCA=DDEEDFEDFEFHHE?FHIIJIIGHHCJJIIGGEGBGFDB*JIJJIGEJJJJJJJIJIJJIJJHHHHHFFFFFCC@	NH:i:1	evidence for insertion
HWI-D00111:192:C39DEACXX:1:2306:10379:50060_1:N:0:GCCAAT	99	Chr7	6067977	60	95M6S	=	6068188	311	TGCTCAAGAGCATCCTGATGATTGTTCCCAGTAGTCACTGCAGTTACAGGGGAGCAGAAACACCTGAATCAAGGGGCGGGAAAGGCGCAAGTGGAACGCGA	CCCFFFFFHHHGHJJJJIJJJIJJJJIJJIIHHIIJFIIJJJEIJJJJJJJJIDHGIJJJJJJJJJJJHHHHCDEEABDDBDD@DBBBBDD:@CCCDDBDB	NH:i:1	evidence for insertion
HWI-D00111:192:C39DEACXX:1:2209:3973:44892_2:N:0:GCCAAT	163	Chr7	6067980	60	92M9S	=	6068073	194	TCAAGAGCATCCTGATGATTGTTCCCAGTAGTCACTGCAGTTACAGGGGAGCAGAAACACCTGAATCAAGGGGCGGGAAAGGCGCAAGTGGAACGCGAAAA	CCCFFFFFHHHFHJIIIJJIJJJIJIJJHIIHHHHIIGIGIJIIJJJBGGGIIJJIGIJJJJIIIIIIEEACD>@BBBDDBD<BDDDDCCC:CC@BDB>B5	NH:i:1	evidence for insertion
HWI-D00111:192:C39DEACXX:1:2102:11495:46560_2:N:0:GCCAAT	163	Chr7	6067983	60	89M10S	=	6068284	402	AGAGCATCCTGATGATTGTTCCCAGTAGTCACTGCAGTTACAGGGGAGCAGAAACACCTGAATCAAGGGGCGGGAAAGGCGCAAGTGGAACGCGAAAAG	@@@FDDEDHHHFFHIIIJHIJJJJJFHIHHJIIIGIJIIGGIGGGGAADAB@FICEHGIIGIJJGIJFEHEDDD9BD?A?@@<<>4@@@A?@@B39>@?	NH:i:1	evidence for insertion
HWI-D00111:192:C39DEACXX:1:2211:6820:12168_1:N:0:GCCAAT	99	Chr7	6067988	60	84M17S	=	6068154	267	ATCCTGATGATTGTTCCCAGTAGTCACTGCAGTTACAGGGGAGCAGAAACACCTGAATCAAGGGGCGGGAAAGGCGCAAGTGGAACGCGAAAAGTCGGTGC	@@@FFFDDHFDHFIIIJJJICIEHHGIIIIGIHHJJEGGGBBDDDFCG@DHIGCHGDHGIGIEEHGDDBBDB<?@>@B@>4@CCCDBDDBDDB?ACBD5<<	NH:i:1	evidence for insertion
HWI-D00111:192:C39DEACXX:1:1313:13078:60813_1:N:0:GCCAAT	99	Chr7	6067989	60	83M18S	=	6068131	243	TCCTGATGATTGTTCCCAGTAGTCACTGCAGTTACAGGGGAGCAGAAACACCTGAATCAAGGGGCGGGAAAGGCGCAAGTGGAACGCGAAAAGTCGGTGCC	@@CFFDDFDHHHFHIGGFGC<@AECGHIHHHFHGEDEEHGFHIEHIGGIIIIGIICCHIIGIGIIDBD;;B?BDD9B@@>CDCDDD@B>@>BC348<0<>C	NH:i:1	evidence for insertion
HWI-D00111:192:C39DEACXX:1:2106:18422:66629_2:N:0:GCCAAT	163	Chr7	6067992	60	80M21S	=	6068092	201	TGATGATTGTTCCCAGTAGTCACTGCAGTTACAGGGGAGCAGAAACACCTGAATCAAGGGGCGGGAAAGGCGCAAGTGGAACGCGAAAAGTCGGTGCCATC	CC@FFFFFHHHGHGIJHIGFHGHJJJJJGIJJIJIGIBGEGIIJIIJGJGGGHJIJJIIIIIDDDB7ABD@DBDDD:ACCCDBB>5>BBC3:?B5@@?:@C	NH:i:1	evidence for insertion
HWI-D00111:192:C39DEACXX:1:2303:10676:63500_1:N:0:GCCAAT	147	Chr7	6067992	60	80M21S	=	6067810	-283	TGATGATTGTTCCCAGTAGTCACTGCAGTTACAGGGGAGCAGAAACACCTGAATCAAGGGGCGAGAAAGGCGCAAGTGGAACGCGAAAAGTCGGTGCCATC	DDDDDDDDB?BDDDDDDDDDCDDDDDEDEDC@CDDDDDDDEEEDEFDFFFCFHCHFEJJIHC>)JJJJJJJJIJJJJJIJJJGGC:JJHHHHHFFFFFCCC	NH:i:1	evidence for insertion
HWI-D00111:192:C39DEACXX:1:1311:7207:93089_1:N:0:GCCAAT	147	Chr7	6067996	60	76M25S	=	6067903	-194	GATTGTTCCCAGTAGTCACTGCAGTTACAGGGGAGCAGAAACACCTGAATCAAGGGGCGGGAAAGGCGCAAGTGGAACGCGAAAAGTCGGTGCCATCCAAG	ADDDDDDDDDDDDDCCA>DDDCDDCA>DCDDDDDDDDCCBCC>EEEEDEEFEBFHHHAIJGJJJIGIGIIJJJJJIGJJIGJJIIJJJHHHGHFFFFFC@@	NH:i:1	evidence for insertion
HWI-D00111:192:C39DEACXX:1:1303:17376:14405_1:N:0:GCCAAT	147	Chr7	6068004	60	68M33S	=	6067848	-257	CCAGTAGTCACTGCAGTTACAGGGGAGCAGAAACACCTGAATCAAGGGGCGGGAAAGGCGCAAGTGGAACGCGAAAAGTCGGTGCCATCCAAGGTGATTTC	DDCC>DDCCCDDDCDADCCBCDDDDCDDDCCBC>5DDDFDCCCBADFDA8HGEHGGJGIGGEHHIH?JIIIIIJJIGIGJIIGGIGGGHFHDGFFFFF@@@	NH:i:1	evidence for insertion
HWI-D00111:192:C39DEACXX:1:1203:13247:10479_2:N:0:GCCAAT	163	Chr7	6068029	60	43M14I44M	=	6068220	291	AGCAGAAACACCTGAATCAAGGGGCGGGAAAGGCGCAAGTGGAACGCGAAAAGTCGGTGCCATCCAAGGTGATTTCAGTGCCAACCATGTGCTGAAAGAGA	CCCFFFFFHHHHHIJJJJJIJJJJJJJGEFDEECDBBDDACDCCDDBDBD7BA9@BB8@BDCCDDDDDD:A@C@DCDCCDCDCDBDDCDDDDDD:ADDAC?	NH:i:1	evidence for insertion
HWI-D00111:192:C39DEACXX:1:1116:8814:14464_1:N:0:GCCAAT	99	Chr7	6068065	60	48S53M	=	6068125	209	CAGAAACACCTGAATCAAGGGGCGGGAAAGGCGCAAGTGGAACGCGAAAAGTCGGTGCCATCCAAGGTGATTTCAGTGCCAACCATGTGCTGAAAGAGAGG	CCCFFFFFHHHHHJJJIJIJIJIJJJHFFFEDDDDDD@CDDDDDDDDDDDDACDDBDDDDDDDDDDD@CCDEEDEDEDDDDDDDDDDDCDDDDDCCDDCDD	NH:i:1	evidence for insertion
HWI-D00111:192:C39DEACXX:1:1102:1739:87288_2:N:0:GCCAAT	163	Chr7	6068065	60	23S66M	=	6068182	241	GAAAGGCGCAAGTGGAACGCGAAAAGTCGGTGCCATCCAAGGTGATTTCAGTGCCAACCATGTGCTGAAAGAGAGGAGAAGAAGAGAGA	@@@DDF8@ADADAFEGHEGGIIIGIH*/666<8CAH;C@DHH.7=9CD7;));7>>@19@AC5;>;@3:CA?CD8?12<AC??AAB??7	NH:i:1	evidence for insertion
HWI-D00111:192:C39DEACXX:1:1204:2574:5708_2:N:0:GCCAAT	163	Chr7	6068065	60	16S85M	=	6068157	209	GCAAGTGGAACGCGAAAAGTCGGTGCCATCCAAGGTGATTTCAGTGCCAACCATGTGCTGAAAGAGAGGAGAAGAAGAGAGAAGCTCAATGAGAAGTTCAT	CCCFFDFFHHHHHJJJJIIDHIJGHIJIJJJJJJJ=FGIJJJIJGHJJHIJHHHHHFFFFFFFEEEEDDDDDDDDDDDDDDDDCCDDDDDDDDDDD3@CDD	NH:i:1	evidence for insertion
HWI-D00111:192:C39DEACXX:1:1310:8972:95750_1:N:0:GCCAAT	147	Chr7	6068065	60	22S79M	=	6067896	-248	AAAGGCGCAAGTGGAACGCGAAAAGTCGGTGCCATCCAAGGTGATTTCAGTGCCAACCATGTGCTGAAAGAGAGGAGAAGAAGAGAGAAGCTCAATGAGAA	CDDDDBDDCCDEDDB@DDBEEEDDFGHGHGBHIGGHCHHIIJIGIIIFJHGIGGHAJIFDIFJJJJJJIHDGEIGIJIJJJJIHGGGJHGGHFDDFFFCCC	NH:i:1	evidence for insertion
HWI-D00111:192:C39DEACXX:1:1306:21223:83543_2:N:0:GCCAAT	83	Chr7	6068065	60	40S59M	=	6067900	-224	CCTGAATCAAGGGGCGGGAAAGGCGCAAGTGGAACGCGAAAAGTCGGTGCCATCCAAGGTGATTTCAGTGCCAACCATGTGCTGAAAGAGAGGAGAAGA	AAA:>B@@?8<9<<@@AAA==389:@>:>>3?88BFE@>C;@@AEFFAEFB49D<39FDD:4?BCEFFGDFC4:FCCFDFIFECB<BF?CC=+8DA@?1	NH:i:1	evidence for insertion
HWI-D00111:192:C39DEACXX:1:1315:12417:3521_1:N:0:GCCAAT	147	Chr7	6068065	60	10S91M	=	6067907	-249	GGAACGCGAAAAGTCGGTGCCATCCAAGGTGATTTCAGTGCCAACCATGTGCTGAAAGAGAGGAGAAGAAGAGAGAAGCTCAATGAGAAGTTCATAATTCT	CDDDDDDDCDDDDCDFFFFHHFFFIJIIIJIGIJIGDGGJJJHFIJJJHHFJJJJJIIJJIJIJIJJJJJJIJIJJJJJJJJJJJJJJHGHHDFFFFFB@@	NH:i:1	evidence for insertion
HWI-D00111:192:C39DEACXX:1:2209:3121:67112_2:N:0:GCCAAT	83	Chr7	6068065	60	4S92M	=	6067912	-245	CGAAAAGTCGGTGCCATCCAAGGTGATTTCAGTGCCAACCATGTGCTGAAAGAGAGGAGAAGAAGAGAGAAGCTCAATGAGAAGTTCATAATTCTG	?A>>88?@@D>@;(;DCA?=@7;@8;CC>IIEC@ACEDDDCDB9ED@D<:?1*CEEDFFE>@<EC2+4@DA<3+A3AC:EBEEDDCDDDDDA+?=:	NH:i:1	evidence for insertion
HWI-D00111:192:C39DEACXX:1:1107:4824:32669_2:N:0:GCCAAT	83	Chr7	6068065	60	3S98M	=	6067960	-203	GAAAAGTCGGTGCCATCCAAGGTGATTTCAGTGCCAACCATGTGCTGAAAGAGAGGAGAAGAAGAGAGAAGCTCAATGAGAAGTTCATAATTCTGCGATCT	>::?B=8;@>??;;.6@?;@?;77?>;E@7@@@;-7B8.<;AB48*8FGD??3D9?4FFC9C<?4DF<C*9HHC<@AC<:A<FBFGBF<C+8D=2AA;@??	NH:i:1	evidence for insertion
									We highlght the insertion in 13 selected reads by color. Note that all reads except one have evidence for insertion
									red - part of the clipped part concordant with insertion
									orange - aligned part concordant with insertion
									grey - other sequence of the clipped part

## Sheet: 2-tview
# View of alignment near the indel site ( 6068071), from 6068050 to 6068110
# Analysis of reads from TKM9 near Rc wildtype deletion visualized via samtools tview
	Description	Samtools tview output					Analysis of output
	Chr 7 positions	6068051 6068061 6068071 6068081 6068091 6068101
	Nipponbare reference sequence	GGGCGGGAAAGGCGCAAGTGGA**************TGCCATCCAAGGTGATTTCAGTGCCAACCATGTGCTGAAAGAGA
	Consensus	...................S.R ............................................					Consensus is erroneous
	Alignments( rows 8-27)	,,,,,,,,,,,,,,,,,,,,,,**************.............................T..............					Two reads (comma: reverse strand, dot: forward strand) touching the insertion points on right on left resp
		,,,,,,,,,,,,,,,,,,,,,,************** ,,,,,,,,,,,,,,,,,,,,,,,,,,,,,,,,,,,,,,,,,,,					Subooptimally aligned reads ( clipped on the right)
		......................************** ,,,,,,,,,,,,,,,,,,,,,,,,
		......................************** ,,,,,,,,,,,,,,,,,
		......................**************
		......................**************
		......................**************
		......................**************
		,,,,,a,,,,,,,,,,,,,,,,**************
		,,,,,,,,,,,,,,,,,,,,,,**************
		,,,,,,,,,,,,,,,,,,,,,,**************
		......................ACGCGAAAAGTCGG............................................					Correctly aligned read showing insertion
		....C.G**************............................................					Erroneously aligned reads: 7 bases of the inserion sequence were aligned to reference upstream the insertion point )showing two mismatched C and G), while the other 7 bases were clipped
		....C.G**************............................................
		....C.G**************............................................
		,,,,c,g**************,,,,,,,,,,,,,,,,,,,,,,,,,,,,,,,,,,,,,,,,,,,,
		,,,,c,g**************,,,,,,,,,,,,,,,,,,,,,,,,,,,,,,,,,,,,,,,,,,,,
		,,,,c,g**************,,,,,,,,,,,,,,,,,,,,,,,,,,,,,,,,,,,,,,,,,,,,
		,,,,c,g**************,,,,,,,,,,,,,,,,,,,,,,,,,,,,,,,,,,,,,,,,,,,,
		,,,,c,g**************,,,,,,,,,,,,,,,,,,,,,,,,,,,,,,,,,,,,,,,,,,,,
							Source of mismatch in the bottom 8 reads:
							NB reference bases preceding 606871	AAGTGGA
							Second half of insertion sequence	AAGTCGG
