# Supplementary material for: Enriched-GWAS and Transcriptome Analysis to Refine and Characterize a Major QTL for Anaerobic Germination Tolerance in Rice
Source: Int J Mol Sci. 2021 Apr 24;22(9):4445. doi: 10.3390/ijms22094445 (PMC8123023; doi:10.3390/ijms22094445)
Supplement: Supplementary file 1 [file ijms-22-04445-s001.zip › Suppl_File6.xlsx]

## Sheet: Genes_ptotein-altering_variants
Supplementary File 6. Annotated genes contain protein-altering variants.
Locus	Annotation	max_logP	nonsyn	start_gain_loss	stop_gain_loss	splice_effect	indel	large_del_bp	syn
LOC_Os07g10970	leucine zipper protein-like, putative, expressed	4.32	0	0	0	0	1	0	0
LOC_Os07g11020	rc - bHLH transcription factor regulating proanthocyanidin production in seeds, expressed	7.42	0	0	0	0	3	44	3
LOC_Os07g11050	IPP transferase, putative, expressed	6.94	6	0	0	0	0	0	5
LOC_Os07g11060	expressed protein	6.52	0	0	0	0	2	0	2
LOC_Os07g11070	DUF630/DUF632 domains containing protein, putative, expressed	6.61	2	0	0	0	1	0	2
LOC_Os07g11100	hypothetical protein	5.99	2	0	0	0	0	0	0
LOC_Os07g11110	NAD dependent epimerase/dehydratase family protein, putative, expressed	5.59	0	0	0	0	4	0	3
LOC_Os07g11120	hydrolase, NUDIX family, domain containing protein, expressed	3.65	0	0	0	0	2	0	0
LOC_Os07g11250	expressed protein	4.04	1	0	0	0	0	0	1
LOC_Os07g11290	expressed protein	4.5	2	0	0	0	0	0	0
LOC_Os07g11300	expressed protein	5.22	0	1	0	0	0	0	0
LOC_Os07g11310	LTPL166 - Protease inhibitor/seed storage/LTP family protein precursor, expressed	3.98	1	0	0	0	0	0	5
LOC_Os07g11320	RAL1 - Seed allergenic protein RA5/RA14/RA17 precursor, expressed	4.68	30	0	0	0	2	0	7
LOC_Os07g11330	RAL2 - Seed allergenic protein RA5/RA14/RA17 precursor, expressed	4.77	11	0	0	0	0	0	11
LOC_Os07g11360	RAL3 - Seed allergenic protein RA5/RA14/RA17 precursor, expressed	4.6	2	0	0	0	1	0	3
LOC_Os07g11370	expressed protein	4.42	4	0	0	0	0	0	0
LOC_Os07g11380	RAL4 - Seed allergenic protein RA5/RA14/RA17 precursor, expressed	3.92	2	0	0	0	0	0	0
LOC_Os07g11490	expressed protein	3.52	0	1	0	0	0	0	2
LOC_Os07g11530	latency associated nuclear antigen, putative, expressed	4.77	0	0	0	0	0	542	0
LOC_Os07g11560	expressed protein	5.48	0	0	0	0	0	1068	0
LOC_Os07g11630	LTPL163 - Protease inhibitor/seed storage/LTP family protein precursor, expressed	5.77	6	0	0	0	2	0	3
LOC_Os07g11650	LTPL164 - Protease inhibitor/seed storage/LTP family protein precursor, expressed	5.87	3	0	0	0	2	0	8
LOC_Os07g11900	PROLM19 - Prolamin precursor, putative, expressed	3.61	0	0	0	0	0	0	0
LOC_Os07g11910	PROLM20 - Prolamin precursor, expressed	3.87	0	0	0	0	0	852	0
LOC_Os07g11920	PROLM22 - Prolamin precursor, expressed	4.23	0	0	0	0	0	694	0
