# Supplementary material for: Enriched-GWAS and Transcriptome Analysis to Refine and Characterize a Major QTL for Anaerobic Germination Tolerance in Rice
Source: Int J Mol Sci. 2021 Apr 24;22(9):4445. doi: 10.3390/ijms22094445 (PMC8123023; doi:10.3390/ijms22094445)
Supplement: Supplementary file 1 [file ijms-22-04445-s001.zip › Suppl_File7.xlsx]

## Sheet: metadata
Supplementary File 7. Information about variants in the AG2 peak region
Sheets	Description
all-9791-variants	Information about Variants in the AG2 peak region
selected-120	Further information about the selected 120 variants in the peak region used for region analysis
Columns	Description	Comment/DataSource	Values
Variant_ID	Variant ID as specified in 3K PLINK files	3kRG
Position	Physical position on Chromosome 7 of IRGSP-1.0 reference build	3kRG
Allele1	Alternate allele	3kRG	For indels, deletions, PAV the code V stands for variant allele, R for reference allele. Variants starting with DEL_ are deletion clusters from Fuentes et al (2019). Variants named as D(number) are PAV with number indicating number of bases affected.
Allele2_Ref	Reference allele	3kRG	For indels, deletions, PAV the code V stands for variant allele, R for reference allele. Variants starting with DEL_ are deletion clusters from Fuentes et al (2019). Variants named as D(number) are PAV with number indicating number of bases affected.
AF	Frequency of alternate allele	GWAS output from GEMMA (this study)
beta	Estimate of effect size	GWAS output from GEMMA (this study)
P_value	P value (Wald test)	GWAS output from GEMMA (this study)
Ref_len	Number of bases on reference that the variant affects (only applied to deletions and PAV)	GWAS output from GEMMA (this study)
Variant_effect	Effect of variant on gene or protein sequence	3kRG	SNPs effects as annotated with SNPeff in 3kRG project; indel ; PAV
start	Start of gene	MSU7
stop	End of gene	MSU7
locus	MSU locus ID	MSU7
strand	Strand	MSU7
annotation	Description of gene function (MSU)	MSU7

## Sheet: all-9791-variants
Variant_ID	Position	Allele1	Allele2_Ref	AF	beta	P_value	Variant_effect
218334668_ATCCTATGAA	6002761	V	R	0.028	-0.0752347	0.703022	indel
218334686	6002779	C	T	0.742	0.161544	0.0541726	intron_variant
218334717	6002810	A	G	0.768	0.0968583	0.257031	intron_variant
218335413	6003506	A	G	0.781	0.136552	0.118469	intron_variant
218335424	6003517	T	C	0.78	0.146684	0.0921427	intron_variant
218335696_1	6003789	V	R	0.7	0.0491383	0.484185	indel
218335701	6003794	G	T	0.715	0.050175	0.551582	intron_variant
218335707	6003800	A	G	0.786	0.140291	0.111915	intron_variant
218335822	6003915	A	G	0.77	0.121375	0.158634	intron_variant
218335948	6004041	T	C	0.66	0.189789	0.0310778	intron_variant
218336086	6004179	A	G	0.774	0.138634	0.112276	intron_variant
218336099	6004192	T	G	0.76	0.131841	0.124756	intron_variant
218336130_CA	6004223	V	R	0.159	-0.0550728	0.585834	indel
218336330	6004423	A	G	0.754	0.0917746	0.277494	intron_variant
218336373	6004466	A	G	0.776	0.113483	0.194805	intron_variant
218336385	6004478	T	C	0.771	0.11216	0.19851	splice_donor
218336800	6004893	A	G	0.746	0.125361	0.141604	.
218336868	6004961	T	C	0.776	0.108491	0.208121	.
218337055	6005148	C	T	0.792	0.146031	0.0991507	.
218337245	6005338	A	G	0.769	0.111811	0.191506	.
218337968	6006061	A	T	0.78	0.139082	0.110452	.
218338398	6006491	C	T	0.775	0.0737146	0.394038	.
218338431	6006524	C	T	0.756	0.0483368	0.568858	.
218339001_AGGC	6007094	V	R	0.131	0.000661921	0.996092	indel
218339372_C	6007465	V	R	0.242	0.160136	0.222654	indel
218339418_T	6007511	V	R	0.256	0.0731009	0.586166	indel
218339488_1	6007581	V	R	0.183	0.36142	0.00416351	indel
218339512_2	6007605	V	R	0.049	0.346351	0.072065	indel
218339645_3	6007738	V	R	0.032	0.310325	0.181068	indel
218339815	6007908	T	G	0.449	0.18489	0.0334816	.
218339824_GAT	6007917	V	R	0.031	0.523818	0.0238113	indel
218340057_3	6008150	V	R	0.092	0.0210618	0.889769	indel
218340729_A	6008822	V	R	0.195	0.136667	0.269625	indel
218341178	6009271	T	A	0.252	0.448068	1.10065e-05	.
218341242	6009335	G	A	0.236	0.42199	3.56761e-05	.
218341269	6009362	A	T	0.236	0.42199	3.56761e-05	.
218341286	6009379	C	T	0.253	0.452885	9.57546e-06	.
218341287	6009380	T	C	0.234	0.420489	4.17371e-05	.
218341296	6009389	T	C	0.253	0.455546	8.62396e-06	.
218341334	6009427	C	T	0.253	0.452885	9.57546e-06	.
218341336	6009429	G	A	0.251	0.444622	1.23584e-05	.
218341380	6009473	T	C	0.608	0.190979	0.019042	.
218341444	6009537	T	C	0.597	0.166525	0.0369988	.
218341468	6009561	T	C	0.625	0.204651	0.0111579	.
218341524	6009617	G	A	0.621	0.198963	0.0136555	.
218341546_GC	6009639	V	R	0.551	0.168537	0.0183451	indel
218341579	6009672	T	C	0.611	0.189686	0.0172811	.
218341603_1	6009696	V	R	0.56	0.131298	0.0602185	indel
218341633	6009726	G	A	0.608	0.193206	0.0143573	.
218341692	6009785	G	T	0.621	0.206715	0.0106941	.
218341748	6009841	C	T	0.607	0.202908	0.0110678	.
218341956_ATCT	6010049	V	R	0.377	0.082581	0.207536	indel
218342041	6010134	G	A	0.633	0.21715	0.00692729	.
218342206_2	6010299	V	R	0.329	-0.0800673	0.285727	indel
218342206_3	6010299	V	R	0.058	-0.0346113	0.781814	indel
218342246_AAAAA	6010339	V	R	0.022	0.191905	0.362142	indel
218342246_AAAAAA	6010339	V	R	0.056	0.298325	0.0270866	indel
218342342_1	6010435	V	R	0.323	-0.0692132	0.382436	indel
218342367_G	6010460	V	R	0.173	0.157719	0.0506978	indel
218342412_1	6010505	V	R	0.125	0.0996711	0.333166	indel
DEL_449488	6010704	D	R	0.183	0.0405929	0.626979	DEL/PAV
D7_6010706_18	6010706	D18	<R>	0.183	0.0405929	0.626979	DEL/PAV
218342857_A	6010950	V	R	0.07	0.142168	0.249614	indel
218343473_7	6011566	V	R	0.058	-0.10275	0.61368	indel
218343502_1	6011595	V	R	0.096	0.169747	0.272568	indel
DEL_449490	6012366	D	R	0.003	0.182818	0.733016	DEL/PAV
D7_6012368_215	6012368	D215	<R>	0.003	0.182818	0.733016	DEL/PAV
218344329	6012422	C	G	0.395	-0.217004	0.00645642	.
218344348	6012441	T	A	0.596	0.208077	0.00839275	.
218344354	6012447	A	T	0.573	0.176697	0.0247808	.
218344597_A	6012690	V	R	0.041	-0.00636357	0.971442	indel
218344727	6012820	C	T	0.595	0.200426	0.0120103	.
218344772	6012865	T	C	0.366	-0.172718	0.0339227	.
218344815	6012908	T	C	0.118	-0.220957	0.0566222	.
218344929_2	6013022	V	R	0.039	0.2247	0.29117	indel
218344947_1	6013040	V	R	0.061	0.058698	0.727859	indel
218344947_A	6013040	V	R	0.051	0.0822815	0.670504	indel
218344992_3	6013085	V	R	0.018	0.274594	0.36343	indel
218344994_A	6013087	V	R	0.128	0.0572292	0.553201	indel
218345256_1	6013349	V	R	0.042	0.527801	0.0157538	indel
218345428	6013521	C	T	0.574	0.194834	0.0139521	.
218345435	6013528	G	A	0.576	0.208943	0.00853094	.
218345504	6013597	G	C	0.604	0.233762	0.00401788	.
218345619	6013712	G	A	0.609	0.199666	0.0139709	.
218345709	6013802	T	C	0.601	0.197009	0.0130229	.
218345710_1	6013803	V	R	0.438	0.151992	0.0187677	indel
218345764	6013857	G	A	0.616	0.210954	0.00868867	.
218345774	6013867	A	T	0.613	0.229921	0.00406814	.
218345897_1	6013990	V	R	0.569	0.186605	0.0113508	indel
218346048	6014141	A	C	0.618	0.205462	0.0114266	.
218346150_CAGG	6014243	V	R	0.595	0.176651	0.0196522	indel
218346212	6014305	G	A	0.612	0.216603	0.00725313	.
218346213_A	6014306	V	R	0.529	0.168755	0.0220911	indel
218346441	6014534	C	T	0.62	0.206163	0.0108282	.
218346523	6014616	T	A	0.623	0.210673	0.00945279	.
218346656	6014749	A	C	0.61	0.185622	0.021854	.
218346667	6014760	G	A	0.622	0.201304	0.0114865	.
218346987	6015080	G	T	0.59	0.181757	0.021631	.
218347010_C	6015103	V	R	0.554	0.240667	0.000894485	indel
218347015_3	6015108	V	R	0.02	0.151707	0.493479	indel
218347021	6015114	A	T	0.57	0.215492	0.00557342	.
218347113	6015206	T	A	0.607	0.199842	0.0129532	.
218347196	6015289	G	T	0.611	0.176988	0.0289553	missense
218347203	6015296	T	C	0.615	0.151348	0.0632553	missense
218347226	6015319	A	C	0.613	0.180742	0.0258666	missense
218347227	6015320	A	G	0.613	0.158801	0.0491343	missense
218347253_3	6015346	V	R	0.592	0.166539	0.0334343	indel
218347336_1	6015429	V	R	0.576	0.166385	0.0269162	indel
218347340_2	6015433	V	R	0.575	0.169988	0.0230834	indel
218347355_3	6015448	V	R	0.423	0.152446	0.0190332	indel
218347367_GTCTGTG	6015460	V	R	0.363	0.11854	0.0780448	indel
218347492_AC	6015585	V	R	0.605	0.190373	0.0180111	indel
218347765_5	6015858	V	R	0.575	0.172728	0.0226821	indel
218347786_CA	6015879	V	R	0.595	0.182963	0.0182066	indel
218347811_A	6015904	V	R	0.603	0.195049	0.0148202	indel
218347838	6015931	G	A	0.608	0.182302	0.023735	missense
DEL_449493	6016045	D	R	0.003	0.840137	0.0813569	DEL/PAV
D7_6016047_16	6016047	D16	<R>	0.003	0.840137	0.0813569	DEL/PAV
218347957_T	6016050	V	R	0.57	0.154594	0.0362337	indel
218347968_A	6016061	V	R	0.566	0.157522	0.029117	indel
218347985_2	6016078	V	R	0.602	0.216928	0.00552624	indel
218348162	6016255	C	T	0.608	0.19169	0.0180904	missense
218348163	6016256	A	G	0.608	0.19169	0.0180904	synonymous_variant
218348189	6016282	A	T	0.608	0.19169	0.0180904	missense
218348219_TGA	6016312	V	R	0.604	0.193848	0.015418	indel
218348444	6016537	A	G	0.61	0.19175	0.0181121	missense
218348578	6016671	G	A	0.607	0.190211	0.0192483	missense
218349065	6017158	C	T	0.607	0.195043	0.0161219	missense
218349118	6017211	A	C	0.607	0.195043	0.0161219	missense
218349261_A	6017354	V	R	0.593	0.177411	0.0205681	indel
218349399	6017492	A	G	0.609	0.174045	0.0317589	.
218349483	6017576	A	G	0.607	0.178636	0.0282098	.
218349488	6017581	C	T	0.609	0.183695	0.0238089	.
218349498_TAAG	6017591	V	R	0.585	0.234316	0.00163471	indel
218349609	6017702	T	C	0.611	0.221702	0.00615636	3_prime_UTR_variant
218349641	6017734	T	G	0.608	0.18888	0.0201276	3_prime_UTR_variant
218349652	6017745	A	G	0.605	0.184418	0.0228248	3_prime_UTR_variant
218349653	6017746	C	T	0.603	0.193686	0.0173064	3_prime_UTR_variant
218349812	6017905	C	T	0.607	0.19046	0.0192966	3_prime_UTR_variant
218349814	6017907	T	G	0.609	0.198576	0.014435	3_prime_UTR_variant
218349826	6017919	A	G	0.61	0.19175	0.0181121	3_prime_UTR_variant
218349869_1	6017962	V	R	0.592	0.144391	0.0637945	indel
218349875	6017968	G	A	0.61	0.19175	0.0181121	3_prime_UTR_variant
218350010	6018103	G	A	0.607	0.191756	0.0184828	3_prime_UTR_variant
218350041	6018134	T	C	0.607	0.181678	0.0240045	3_prime_UTR_variant
218350099_AG	6018192	V	R	0.019	0.176445	0.458051	indel
218350099_G	6018192	V	R	0.586	0.157752	0.0412447	indel
218350157	6018250	A	G	0.609	0.176166	0.0287357	3_prime_UTR_variant
218350174	6018267	G	A	0.609	0.194208	0.0168209	3_prime_UTR_variant
218350205	6018298	C	A	0.609	0.189033	0.0197246	3_prime_UTR_variant
218350206	6018299	A	G	0.609	0.189033	0.0197246	3_prime_UTR_variant
D7_6018516_4	6018516	D4	<R>	0.007	0.439774	0.25023	DEL/PAV
DEL_449494	6018518	D	R	0.01	0.203907	0.493018	DEL/PAV
D7_6018520_1	6018520	D1	<R>	0.01	0.203907	0.493018	DEL/PAV
D7_6018521_1696	6018521	D1696	<R>	0.01	0.203907	0.493018	DEL/PAV
218350519_2	6018612	V	R	0.574	0.210799	0.00609146	indel
218350523	6018616	G	A	0.541	0.153296	0.0604764	3_prime_UTR_variant
218350570	6018663	A	G	0.616	0.204303	0.0124165	3_prime_UTR_variant
218350898	6018991	G	T	0.615	0.210993	0.00939024	missense
218350906_1	6018999	V	R	0.476	0.120955	0.0856789	indel
218350908_TAAAG	6019001	V	R	0.479	0.119087	0.0895538	indel
218350980	6019073	T	C	0.616	0.204303	0.0124165	missense
218350992	6019085	C	T	0.617	0.189797	0.0197286	missense
218351088	6019181	C	A	0.616	0.204303	0.0124165	missense
218351096	6019189	G	A	0.616	0.204303	0.0124165	missense
218351139	6019232	A	G	0.615	0.197153	0.0154912	missense
218351302	6019395	C	A	0.616	0.204303	0.0124165	missense
218351386	6019479	T	C	0.616	0.173849	0.0346316	synonymous_variant
218351388	6019481	C	T	0.616	0.173849	0.0346316	missense
218351400	6019493	A	C	0.619	0.186157	0.0225908	missense
218351404	6019497	C	T	0.619	0.186157	0.0225908	synonymous_variant
218351472	6019565	A	T	0.615	0.186049	0.0226877	missense
218351506	6019599	C	A	0.619	0.202306	0.0131348	missense
218351548	6019641	C	T	0.613	0.200679	0.0133494	synonymous_variant
218351691	6019784	G	A	0.616	0.204303	0.0124165	missense
218351773	6019866	G	T	0.617	0.204501	0.0123085	missense
218351808	6019901	T	C	0.619	0.207132	0.0115187	missense
218351811	6019904	C	T	0.619	0.207132	0.0115187	missense
218351867	6019960	T	A	0.617	0.205411	0.0122454	missense
218351869	6019962	G	A	0.619	0.202306	0.0131348	synonymous_variant
218351912	6020005	T	A	0.616	0.204303	0.0124165	missense
218351947	6020040	T	C	0.617	0.20659	0.0113311	synonymous_variant
218352075	6020168	G	C	0.616	0.204303	0.0124165	5_prime_UTR_variant
D7_6020217_34	6020217	D34	<R>	0.01	0.203907	0.493018	DEL/PAV
D7_6020251_931	6020251	D931	<R>	0.01	0.203907	0.493018	DEL/PAV
218352224_8	6020317	V	R	0.123	0.221725	0.0123199	indel
218352237	6020330	G	A	0.572	0.212509	0.00821573	5_prime_UTR_variant
218352245	6020338	C	G	0.615	0.21901	0.00770454	5_prime_UTR_variant
218352255	6020348	C	T	0.614	0.203968	0.0127183	5_prime_UTR_variant
218352261_4	6020354	V	R	0.555	0.228127	0.00137257	indel
218352326	6020419	T	C	0.615	0.192895	0.018111	5_prime_UTR_variant
218352343	6020436	A	G	0.616	0.204303	0.0124165	start_gain
218352348	6020441	G	A	0.613	0.199061	0.014839	5_prime_UTR_variant
218352354_1	6020447	V	R	0.553	0.126046	0.0950427	indel
218352366	6020459	G	A	0.617	0.198142	0.0147661	5_prime_UTR_variant
218352376	6020469	C	A	0.612	0.206538	0.0109732	5_prime_UTR_variant
218352379	6020472	C	T	0.611	0.205165	0.0111079	start_gain
218352382	6020475	C	T	0.611	0.205165	0.0111079	5_prime_UTR_variant
218352468_A	6020561	V	R	0.541	0.11306	0.107156	indel
218352478_3	6020571	V	R	0.524	0.128264	0.0640086	indel
218352496	6020589	G	A	0.612	0.200577	0.0138884	5_prime_UTR_variant
218352512	6020605	T	A	0.616	0.204303	0.0124165	5_prime_UTR_variant
218352525	6020618	A	G	0.615	0.210564	0.0101081	5_prime_UTR_variant
218352539_1	6020632	V	R	0.577	0.304834	4.79743e-05	indel
218352553	6020646	G	A	0.609	0.223775	0.0061195	5_prime_UTR_variant
218352554	6020647	C	T	0.609	0.223775	0.0061195	start_gain
218352563	6020656	C	T	0.61	0.224615	0.00606133	intragenic_variant
218352572	6020665	T	C	0.608	0.22764	0.00553081	intragenic_variant
218352574_7	6020667	V	R	0.363	0.125413	0.0530674	indel
218352628	6020721	A	C	0.616	0.22659	0.00523175	intragenic_variant
218352637	6020730	T	C	0.613	0.210843	0.00968252	intragenic_variant
218352661	6020754	A	G	0.617	0.188677	0.0206951	intragenic_variant
218352715	6020808	T	C	0.613	0.210696	0.0098873	intragenic_variant
218352720	6020813	A	C	0.615	0.212841	0.00892069	intragenic_variant
218352814	6020907	A	T	0.596	0.158246	0.0472805	intragenic_variant
218352816_8	6020909	V	R	0.481	0.0854166	0.204672	indel
218352861	6020954	G	T	0.612	0.209787	0.0100882	intragenic_variant
218352863	6020956	C	T	0.612	0.209787	0.0100882	intragenic_variant
218352870	6020963	C	G	0.614	0.203802	0.0125918	intragenic_variant
218352904	6020997	A	C	0.612	0.213805	0.00911617	intragenic_variant
218353002_1	6021095	V	R	0.562	0.221655	0.0022948	indel
218353026	6021119	G	T	0.61	0.187892	0.021029	intragenic_variant
D7_6021182_36	6021182	D36	<R>	0.014	0.274088	0.265567	DEL/PAV
218353104	6021197	T	G	0.615	0.200992	0.0129506	.
218353121_1	6021214	V	R	0.522	0.110718	0.0989091	indel
D7_6021218_3	6021218	D3	<R>	0.017	0.124172	0.574416	DEL/PAV
D7_6021221_3	6021221	D3	<R>	0.02	0.248497	0.204396	DEL/PAV
218353130_A	6021223	V	R	0.519	0.177573	0.00700475	indel
D7_6021224_1	6021224	D1	<R>	0.02	0.248497	0.204396	DEL/PAV
D7_6021225_2	6021225	D2	<R>	0.02	0.248497	0.204396	DEL/PAV
D7_6021227_1	6021227	D1	<R>	0.027	0.132637	0.419764	DEL/PAV
D7_6021228_2	6021228	D2	<R>	0.031	0.103046	0.513594	DEL/PAV
D7_6021230_1	6021230	D1	<R>	0.031	0.103046	0.513594	DEL/PAV
D7_6021231_1	6021231	D1	<R>	0.031	0.103046	0.513594	DEL/PAV
D7_6021232_1	6021232	D1	<R>	0.031	0.103046	0.513594	DEL/PAV
D7_6021233_1	6021233	D1	<R>	0.034	0.0867187	0.562479	DEL/PAV
D7_6021234_2	6021234	D2	<R>	0.034	0.0867187	0.562479	DEL/PAV
D7_6021236_1	6021236	D1	<R>	0.034	0.0867187	0.562479	DEL/PAV
D7_6021237_1	6021237	D1	<R>	0.034	0.0867187	0.562479	DEL/PAV
D7_6021238_1	6021238	D1	<R>	0.034	0.0867187	0.562479	DEL/PAV
D7_6021239_2	6021239	D2	<R>	0.037	0.044294	0.758394	DEL/PAV
D7_6021241_1	6021241	D1	<R>	0.041	0.109783	0.426137	DEL/PAV
D7_6021242_1	6021242	D1	<R>	0.041	0.109783	0.426137	DEL/PAV
D7_6021243_1	6021243	D1	<R>	0.041	0.109783	0.426137	DEL/PAV
D7_6021244_1	6021244	D1	<R>	0.041	0.109783	0.426137	DEL/PAV
D7_6021245_1	6021245	D1	<R>	0.041	0.109783	0.426137	DEL/PAV
D7_6021246_1	6021246	D1	<R>	0.041	0.109783	0.426137	DEL/PAV
D7_6021247_1	6021247	D1	<R>	0.044	0.0965998	0.477287	DEL/PAV
D7_6021248_1	6021248	D1	<R>	0.051	0.114202	0.377832	DEL/PAV
D7_6021249_1	6021249	D1	<R>	0.054	0.133925	0.287413	DEL/PAV
D7_6021250_1	6021250	D1	<R>	0.058	0.126993	0.301153	DEL/PAV
D7_6021251_1	6021251	D1	<R>	0.058	0.126993	0.301153	DEL/PAV
218353159_1	6021252	V	R	0.476	0.0927517	0.155023	indel
D7_6021252_1	6021252	D1	<R>	0.058	0.126993	0.301153	DEL/PAV
D7_6021253_1	6021253	D1	<R>	0.061	0.10256	0.386944	DEL/PAV
D7_6021254_1	6021254	D1	<R>	0.068	0.134241	0.236836	DEL/PAV
D7_6021255_1	6021255	D1	<R>	0.071	0.169825	0.1261	DEL/PAV
D7_6021256_1	6021256	D1	<R>	0.078	0.207351	0.0540661	DEL/PAV
D7_6021257_1	6021257	D1	<R>	0.085	0.257078	0.013739	DEL/PAV
D7_6021258_1	6021258	D1	<R>	0.092	0.233491	0.0196867	DEL/PAV
DEL_449496	6021258	D	R	0.176	0.118138	0.117421	DEL/PAV
D7_6021259_1	6021259	D1	<R>	0.098	0.226681	0.0195983	DEL/PAV
D7_6021260_1	6021260	D1	<R>	0.098	0.226681	0.0195983	DEL/PAV
D7_6021261_2	6021261	D2	<R>	0.108	0.230092	0.0134574	DEL/PAV
D7_6021263_1	6021263	D1	<R>	0.112	0.259295	0.00443485	DEL/PAV
D7_6021264_1	6021264	D1	<R>	0.119	0.252884	0.00471587	DEL/PAV
D7_6021265_1	6021265	D1	<R>	0.119	0.252884	0.00471587	DEL/PAV
D7_6021266_1	6021266	D1	<R>	0.119	0.252884	0.00471587	DEL/PAV
D7_6021267_2	6021267	D2	<R>	0.122	0.259364	0.00353367	DEL/PAV
D7_6021269_1	6021269	D1	<R>	0.125	0.194155	0.0264576	DEL/PAV
D7_6021270_1	6021270	D1	<R>	0.129	0.185753	0.031616	DEL/PAV
D7_6021271_3	6021271	D3	<R>	0.132	0.191195	0.0250774	DEL/PAV
D7_6021274_1	6021274	D1	<R>	0.132	0.191195	0.0250774	DEL/PAV
D7_6021275_2	6021275	D2	<R>	0.139	0.188338	0.0235832	DEL/PAV
218353183	6021276	T	G	0.596	0.212804	0.0089657	.
D7_6021277_4	6021277	D4	<R>	0.139	0.188338	0.0235832	DEL/PAV
218353187	6021280	A	G	0.591	0.216262	0.00784889	.
D7_6021281_14	6021281	D14	<R>	0.139	0.188338	0.0235832	DEL/PAV
218353190	6021283	T	C	0.589	0.19104	0.0188908	.
218353191	6021284	G	A	0.589	0.213714	0.00827959	.
218353201	6021294	C	A	0.599	0.192977	0.0181854	.
D7_6021295_2	6021295	D2	<R>	0.139	0.188338	0.0235832	DEL/PAV
D7_6021297_1	6021297	D1	<R>	0.142	0.182781	0.0261856	DEL/PAV
D7_6021298_6	6021298	D6	<R>	0.146	0.199229	0.0147562	DEL/PAV
218353211	6021304	C	T	0.573	0.181506	0.0267552	.
D7_6021304_2	6021304	D2	<R>	0.156	0.182461	0.0223824	DEL/PAV
D7_6021306_1	6021306	D1	<R>	0.156	0.182461	0.0223824	DEL/PAV
D7_6021307_1	6021307	D1	<R>	0.159	0.159399	0.0446492	DEL/PAV
218353215_1	6021308	V	R	0.237	0.0368584	0.610174	indel
D7_6021308_1	6021308	D1	<R>	0.163	0.14115	0.0724382	DEL/PAV
D7_6021309_8	6021309	D8	<R>	0.163	0.14115	0.0724382	DEL/PAV
218353217	6021310	C	T	0.552	0.146267	0.07448	.
D7_6021317_1	6021317	D1	<R>	0.163	0.14115	0.0724382	DEL/PAV
D7_6021318_2	6021318	D2	<R>	0.166	0.154725	0.0463166	DEL/PAV
D7_6021320_1	6021320	D1	<R>	0.166	0.154725	0.0463166	DEL/PAV
D7_6021321_1	6021321	D1	<R>	0.166	0.154725	0.0463166	DEL/PAV
D7_6021322_1	6021322	D1	<R>	0.166	0.154725	0.0463166	DEL/PAV
D7_6021323_1	6021323	D1	<R>	0.166	0.154725	0.0463166	DEL/PAV
D7_6021324_1	6021324	D1	<R>	0.166	0.154725	0.0463166	DEL/PAV
D7_6021325_1	6021325	D1	<R>	0.169	0.157431	0.0421612	DEL/PAV
D7_6021326_1	6021326	D1	<R>	0.176	0.141904	0.061723	DEL/PAV
218353234	6021327	C	T	0.547	0.140689	0.0892188	.
D7_6021327_1	6021327	D1	<R>	0.183	0.12729	0.0879173	DEL/PAV
D7_6021328_10	6021328	D10	<R>	0.183	0.12729	0.0879173	DEL/PAV
218353236	6021329	T	C	0.539	0.163771	0.0502952	.
D7_6021338_74	6021338	D74	<R>	0.186	0.127234	0.0863195	DEL/PAV
D7_6021412_1	6021412	D1	<R>	0.18	0.112855	0.133012	DEL/PAV
D7_6021413_4	6021413	D4	<R>	0.18	0.112855	0.133012	DEL/PAV
D7_6021417_402	6021417	D402	<R>	0.176	0.118138	0.117421	DEL/PAV
218353327	6021420	A	C	0.578	0.183595	0.0239109	.
218353343	6021436	T	C	0.581	0.150783	0.0616696	.
218353351	6021444	C	T	0.576	0.172492	0.0328644	.
218353360	6021453	A	G	0.542	0.124624	0.123929	.
218353365	6021458	A	G	0.545	0.152112	0.0650509	.
218353366	6021459	T	G	0.547	0.142849	0.0833659	.
D7_6021819_1	6021819	D1	<R>	0.169	0.171558	0.024862	DEL/PAV
D7_6021820_1	6021820	D1	<R>	0.169	0.171558	0.024862	DEL/PAV
D7_6021821_1	6021821	D1	<R>	0.149	0.205188	0.0117933	DEL/PAV
D7_6021822_1	6021822	D1	<R>	0.149	0.205188	0.0117933	DEL/PAV
D7_6021823_1	6021823	D1	<R>	0.132	0.212781	0.0128783	DEL/PAV
D7_6021824_1	6021824	D1	<R>	0.129	0.208536	0.0156919	DEL/PAV
218353738	6021831	T	C	0.579	0.203881	0.0113998	.
218353746	6021839	C	T	0.582	0.185055	0.0231712	.
218353768	6021861	T	C	0.593	0.212013	0.00802763	.
218353781	6021874	A	G	0.594	0.221593	0.00565946	.
218353785	6021878	T	C	0.588	0.204959	0.0106261	.
218353795_2	6021888	V	R	0.131	0.182799	0.0405145	indel
218353801	6021894	A	C	0.534	0.188368	0.0183503	.
218353805	6021898	A	T	0.538	0.189001	0.0174901	.
218353814	6021907	G	A	0.564	0.253497	0.00154065	.
218353823	6021916	G	T	0.55	0.197592	0.0145536	.
218353829_1	6021922	V	R	0.158	0.0879259	0.29523	indel
218353840_3	6021933	V	R	0.113	0.0326789	0.736145	indel
218353850	6021943	A	T	0.758	-0.0908318	0.363629	.
218353868_T	6021961	V	R	0.159	0.125801	0.120453	indel
218353870	6021963	G	A	0.529	0.175998	0.037866	.
218353874	6021967	G	A	0.535	0.164459	0.0520617	.
218353893	6021986	A	C	0.53	0.186186	0.0232443	.
218353897	6021990	G	A	0.542	0.170276	0.0423464	.
218353913_3	6022006	V	R	0.085	0.0674065	0.529272	indel
218354001_TAGAAG	6022094	V	R	0.146	0.0988642	0.266521	indel
218354034	6022127	C	T	0.607	0.15689	0.0551073	.
218354036	6022129	A	G	0.602	0.166796	0.0403606	.
218354049	6022142	T	C	0.604	0.172736	0.033251	.
218354118	6022211	G	T	0.606	0.187712	0.0209845	.
218354148	6022241	T	C	0.603	0.218049	0.00722198	.
218354154	6022247	A	G	0.604	0.206891	0.0109635	.
218354165	6022258	A	G	0.606	0.201942	0.0133143	.
218354171	6022264	A	G	0.605	0.191069	0.0188404	.
218354175	6022268	T	A	0.601	0.204895	0.0121322	.
218354193	6022286	G	A	0.596	0.193899	0.0166383	.
218354248	6022341	T	A	0.566	0.181296	0.0272378	.
218354262	6022355	G	T	0.545	0.164717	0.0465684	.
218354326_A	6022419	V	R	0.181	0.16245	0.0397267	indel
218354334	6022427	A	T	0.561	0.178973	0.0271396	.
218354337	6022430	G	A	0.557	0.192706	0.0178067	.
218354345	6022438	C	T	0.569	0.21936	0.0078998	.
218354346_1	6022439	V	R	0.26	0.108975	0.137147	indel
218354378_TT	6022471	V	R	0.49	0.144954	0.0325525	indel
218354399	6022492	A	G	0.61	0.185886	0.0207728	.
218354436	6022529	G	T	0.6	0.201921	0.0133084	.
218354507_A	6022600	V	R	0.424	0.136622	0.0317574	indel
218354629	6022722	C	A	0.604	0.224051	0.00552962	.
218354673	6022766	T	C	0.613	0.24688	0.00207967	.
218354686_1	6022779	V	R	0.367	0.227658	0.000632537	indel
218354706	6022799	G	A	0.595	0.214045	0.00769541	.
218354769_T	6022862	V	R	0.374	0.0864382	0.179111	indel
D7_6022882_3	6022882	D3	<R>	0.003	0.166146	0.719504	DEL/PAV
D7_6022885_1	6022885	D1	<R>	0.003	0.166146	0.719504	DEL/PAV
D7_6022886_1	6022886	D1	<R>	0.003	0.166146	0.719504	DEL/PAV
D7_6022887_3	6022887	D3	<R>	0.007	0.000117069	0.999727	DEL/PAV
D7_6022890_1	6022890	D1	<R>	0.007	0.000117069	0.999727	DEL/PAV
D7_6022891_1	6022891	D1	<R>	0.007	0.000117069	0.999727	DEL/PAV
D7_6022892_1	6022892	D1	<R>	0.007	0.000117069	0.999727	DEL/PAV
D7_6022893_3	6022893	D3	<R>	0.007	0.000117069	0.999727	DEL/PAV
D7_6022896_1	6022896	D1	<R>	0.007	0.000117069	0.999727	DEL/PAV
D7_6022897_1	6022897	D1	<R>	0.007	0.000117069	0.999727	DEL/PAV
D7_6022898_1	6022898	D1	<R>	0.007	0.000117069	0.999727	DEL/PAV
D7_6022899_1	6022899	D1	<R>	0.007	0.000117069	0.999727	DEL/PAV
D7_6022900_2	6022900	D2	<R>	0.01	-0.383767	0.160566	DEL/PAV
D7_6022902_1	6022902	D1	<R>	0.01	-0.383767	0.160566	DEL/PAV
D7_6022903_1	6022903	D1	<R>	0.01	-0.383767	0.160566	DEL/PAV
D7_6022904_1	6022904	D1	<R>	0.017	-0.318104	0.15341	DEL/PAV
D7_6022905_1	6022905	D1	<R>	0.017	-0.318104	0.15341	DEL/PAV
D7_6022906_1	6022906	D1	<R>	0.017	-0.318104	0.15341	DEL/PAV
D7_6022907_1	6022907	D1	<R>	0.017	-0.318104	0.15341	DEL/PAV
D7_6022908_1	6022908	D1	<R>	0.02	-0.240203	0.24138	DEL/PAV
D7_6022909_1	6022909	D1	<R>	0.031	-0.114526	0.506616	DEL/PAV
D7_6022910_2	6022910	D2	<R>	0.031	-0.114526	0.506616	DEL/PAV
D7_6022912_1	6022912	D1	<R>	0.034	-0.141986	0.390308	DEL/PAV
D7_6022913_1	6022913	D1	<R>	0.041	-0.0433605	0.77821	DEL/PAV
D7_6022914_1	6022914	D1	<R>	0.041	-0.0433605	0.77821	DEL/PAV
D7_6022915_2	6022915	D2	<R>	0.047	-0.00674132	0.962623	DEL/PAV
D7_6022917_1	6022917	D1	<R>	0.047	-0.00674132	0.962623	DEL/PAV
D7_6022918_1	6022918	D1	<R>	0.047	-0.00674132	0.962623	DEL/PAV
D7_6022919_1	6022919	D1	<R>	0.047	-0.00674132	0.962623	DEL/PAV
D7_6022920_1	6022920	D1	<R>	0.047	-0.00674132	0.962623	DEL/PAV
218354828_AA	6022921	V	R	0.358	0.117352	0.0672461	indel
D7_6022921_1	6022921	D1	<R>	0.047	-0.00674132	0.962623	DEL/PAV
D7_6022922_1	6022922	D1	<R>	0.051	0.0293726	0.832176	DEL/PAV
D7_6022923_1	6022923	D1	<R>	0.051	0.0293726	0.832176	DEL/PAV
D7_6022924_1	6022924	D1	<R>	0.061	-0.0527726	0.670285	DEL/PAV
D7_6022925_1	6022925	D1	<R>	0.064	-0.0820771	0.495166	DEL/PAV
D7_6022926_1	6022926	D1	<R>	0.068	-0.0790032	0.499792	DEL/PAV
D7_6022927_1	6022927	D1	<R>	0.071	-0.0960722	0.388786	DEL/PAV
D7_6022928_1	6022928	D1	<R>	0.075	-0.0765336	0.48568	DEL/PAV
D7_6022929_1	6022929	D1	<R>	0.085	-0.0413885	0.692404	DEL/PAV
D7_6022930_1	6022930	D1	<R>	0.085	-0.0413885	0.692404	DEL/PAV
D7_6022931_1	6022931	D1	<R>	0.085	-0.0413885	0.692404	DEL/PAV
D7_6022932_1	6022932	D1	<R>	0.092	-0.00390864	0.968687	DEL/PAV
D7_6022933_1	6022933	D1	<R>	0.092	-0.00390864	0.968687	DEL/PAV
D7_6022934_1	6022934	D1	<R>	0.098	0.0461224	0.628859	DEL/PAV
D7_6022935_1	6022935	D1	<R>	0.102	0.0625461	0.505026	DEL/PAV
D7_6022936_1	6022936	D1	<R>	0.105	0.0734882	0.428165	DEL/PAV
D7_6022937_1	6022937	D1	<R>	0.119	0.00236285	0.978689	DEL/PAV
D7_6022938_1	6022938	D1	<R>	0.125	0.0262479	0.762539	DEL/PAV
D7_6022939_1	6022939	D1	<R>	0.132	0.00932633	0.912253	DEL/PAV
218354847	6022940	C	A	0.61	0.180765	0.022865	.
D7_6022940_1	6022940	D1	<R>	0.132	0.00932633	0.912253	DEL/PAV
D7_6022941_1	6022941	D1	<R>	0.136	0.0202858	0.809576	DEL/PAV
D7_6022942_1	6022942	D1	<R>	0.139	0.0111818	0.893183	DEL/PAV
D7_6022943_1	6022943	D1	<R>	0.146	0.0483859	0.557724	DEL/PAV
D7_6022944_1	6022944	D1	<R>	0.153	0.0512937	0.525144	DEL/PAV
D7_6022945_1	6022945	D1	<R>	0.156	0.0409873	0.608247	DEL/PAV
D7_6022946_1	6022946	D1	<R>	0.159	0.0482501	0.541618	DEL/PAV
D7_6022947_1	6022947	D1	<R>	0.166	0.0317064	0.682861	DEL/PAV
D7_6022948_1	6022948	D1	<R>	0.166	0.0317064	0.682861	DEL/PAV
D7_6022949_1	6022949	D1	<R>	0.169	0.0276611	0.720143	DEL/PAV
D7_6022950_1	6022950	D1	<R>	0.173	0.0258232	0.736611	DEL/PAV
D7_6022951_1	6022951	D1	<R>	0.176	0.0190629	0.804854	DEL/PAV
D7_6022952_1	6022952	D1	<R>	0.176	0.0190629	0.804854	DEL/PAV
D7_6022953_1	6022953	D1	<R>	0.183	0.0300308	0.693959	DEL/PAV
D7_6022954_1	6022954	D1	<R>	0.183	0.0300308	0.693959	DEL/PAV
D7_6022955_1	6022955	D1	<R>	0.186	0.0392775	0.603598	DEL/PAV
D7_6022956_2	6022956	D2	<R>	0.19	0.0457128	0.542615	DEL/PAV
D7_6022958_1	6022958	D1	<R>	0.197	0.0534351	0.467203	DEL/PAV
D7_6022959_1	6022959	D1	<R>	0.203	0.0463817	0.525358	DEL/PAV
D7_6022960_1	6022960	D1	<R>	0.203	0.0463817	0.525358	DEL/PAV
D7_6022961_1	6022961	D1	<R>	0.207	0.0624714	0.390568	DEL/PAV
D7_6022962_1	6022962	D1	<R>	0.207	0.0624714	0.390568	DEL/PAV
D7_6022963_1	6022963	D1	<R>	0.207	0.0624714	0.390568	DEL/PAV
218354871	6022964	T	G	0.595	0.179603	0.0241062	.
D7_6022964_1	6022964	D1	<R>	0.207	0.0624714	0.390568	DEL/PAV
D7_6022965_1	6022965	D1	<R>	0.214	0.077284	0.281824	DEL/PAV
D7_6022966_4	6022966	D4	<R>	0.214	0.077284	0.281824	DEL/PAV
D7_6022970_1	6022970	D1	<R>	0.214	0.077284	0.281824	DEL/PAV
D7_6022971_2	6022971	D2	<R>	0.214	0.077284	0.281824	DEL/PAV
D7_6022973_1	6022973	D1	<R>	0.217	0.0869604	0.224688	DEL/PAV
D7_6022974_2	6022974	D2	<R>	0.217	0.0869604	0.224688	DEL/PAV
D7_6022976_6	6022976	D6	<R>	0.22	0.0935835	0.187617	DEL/PAV
D7_6022982_1	6022982	D1	<R>	0.22	0.0935835	0.187617	DEL/PAV
D7_6022983_2	6022983	D2	<R>	0.224	0.0741544	0.292062	DEL/PAV
D7_6022985_18	6022985	D18	<R>	0.224	0.0741544	0.292062	DEL/PAV
D7_6023003_11	6023003	D11	<R>	0.224	0.0741544	0.292062	DEL/PAV
D7_6023014_9	6023014	D9	<R>	0.227	0.073411	0.29356	DEL/PAV
218354927	6023020	A	G	0.609	0.243522	0.00250392	.
D7_6023023_1	6023023	D1	<R>	0.227	0.073411	0.29356	DEL/PAV
D7_6023024_5	6023024	D5	<R>	0.227	0.073411	0.29356	DEL/PAV
D7_6023029_6	6023029	D6	<R>	0.227	0.073411	0.29356	DEL/PAV
D7_6023035_1	6023035	D1	<R>	0.227	0.073411	0.29356	DEL/PAV
D7_6023036_8	6023036	D8	<R>	0.227	0.073411	0.29356	DEL/PAV
D7_6023044_4	6023044	D4	<R>	0.227	0.073411	0.29356	DEL/PAV
D7_6023048_3	6023048	D3	<R>	0.231	0.0368305	0.599175	DEL/PAV
D7_6023051_2	6023051	D2	<R>	0.231	0.0368305	0.599175	DEL/PAV
D7_6023053_1	6023053	D1	<R>	0.231	0.0368305	0.599175	DEL/PAV
D7_6023054_2	6023054	D2	<R>	0.231	0.0368305	0.599175	DEL/PAV
D7_6023056_12	6023056	D12	<R>	0.234	0.0549151	0.430522	DEL/PAV
218354967	6023060	G	A	0.6	0.217221	0.00730788	.
218354970	6023063	G	A	0.593	0.234368	0.00390405	.
D7_6023068_8	6023068	D8	<R>	0.234	0.0549151	0.430522	DEL/PAV
D7_6023076_1	6023076	D1	<R>	0.234	0.0549151	0.430522	DEL/PAV
218354984	6023077	C	A	0.585	0.20127	0.0112058	.
D7_6023077_1	6023077	D1	<R>	0.234	0.0549151	0.430522	DEL/PAV
D7_6023078_2	6023078	D2	<R>	0.234	0.0549151	0.430522	DEL/PAV
218354987	6023080	A	G	0.577	0.205344	0.0107782	.
D7_6023080_4	6023080	D4	<R>	0.234	0.0549151	0.430522	DEL/PAV
218354991	6023084	G	C	0.576	0.199562	0.0133368	.
D7_6023084_7	6023084	D7	<R>	0.234	0.0549151	0.430522	DEL/PAV
D7_6023091_1	6023091	D1	<R>	0.234	0.0549151	0.430522	DEL/PAV
D7_6023092_1	6023092	D1	<R>	0.234	0.0549151	0.430522	DEL/PAV
D7_6023093_1	6023093	D1	<R>	0.234	0.0549151	0.430522	DEL/PAV
D7_6023094_1	6023094	D1	<R>	0.234	0.0549151	0.430522	DEL/PAV
D7_6023095_2	6023095	D2	<R>	0.241	0.0536884	0.436964	DEL/PAV
218355003	6023096	G	A	0.585	0.218107	0.00580192	.
D7_6023097_1	6023097	D1	<R>	0.247	0.0417403	0.543042	DEL/PAV
218355005	6023098	T	A	0.584	0.216678	0.00628064	.
D7_6023098_1	6023098	D1	<R>	0.254	0.0570318	0.399953	DEL/PAV
D7_6023099_4	6023099	D4	<R>	0.261	0.054067	0.422616	DEL/PAV
D7_6023103_1	6023103	D1	<R>	0.264	0.0333844	0.62143	DEL/PAV
D7_6023104_1	6023104	D1	<R>	0.271	0.0423909	0.528388	DEL/PAV
D7_6023105_1	6023105	D1	<R>	0.278	0.0410314	0.535291	DEL/PAV
D7_6023106_1	6023106	D1	<R>	0.285	0.0481687	0.464286	DEL/PAV
DEL_449498	6023106	D	R	0.593	0.211224	0.00517108	DEL/PAV
218355014	6023107	C	T	0.553	0.249687	0.00184105	.
D7_6023107_1	6023107	D1	<R>	0.288	0.0583199	0.376835	DEL/PAV
218355015	6023108	A	G	0.547	0.251164	0.00177244	.
D7_6023108_1	6023108	D1	<R>	0.325	0.0847926	0.1983	DEL/PAV
D7_6023109_5	6023109	D5	<R>	0.336	0.0893659	0.173292	DEL/PAV
D7_6023114_1	6023114	D1	<R>	0.353	0.0845122	0.201399	DEL/PAV
D7_6023115_1	6023115	D1	<R>	0.359	0.079267	0.231111	DEL/PAV
D7_6023116_1	6023116	D1	<R>	0.366	0.0656265	0.322553	DEL/PAV
D7_6023117_1	6023117	D1	<R>	0.376	0.0715977	0.282975	DEL/PAV
D7_6023118_1	6023118	D1	<R>	0.4	0.072549	0.272541	DEL/PAV
D7_6023119_1	6023119	D1	<R>	0.424	0.0626147	0.352803	DEL/PAV
D7_6023120_1	6023120	D1	<R>	0.434	0.0593502	0.37992	DEL/PAV
D7_6023121_1	6023121	D1	<R>	0.461	0.121212	0.0727003	DEL/PAV
D7_6023122_1	6023122	D1	<R>	0.488	0.157435	0.0184218	DEL/PAV
D7_6023123_1	6023123	D1	<R>	0.525	0.174183	0.011767	DEL/PAV
D7_6023124_1	6023124	D1	<R>	0.542	0.182543	0.00842667	DEL/PAV
D7_6023125_11	6023125	D11	<R>	0.583	0.211057	0.00406498	DEL/PAV
218355038_G	6023131	V	R	0.056	0.193953	0.150231	indel
D7_6023136_16	6023136	D16	<R>	0.586	0.203385	0.00621049	DEL/PAV
D7_6023152_1	6023152	D1	<R>	0.59	0.210547	0.00498537	DEL/PAV
D7_6023153_39	6023153	D39	<R>	0.593	0.211224	0.00517108	DEL/PAV
D7_6023192_20	6023192	D20	<R>	0.593	0.211224	0.00517108	DEL/PAV
DEL_449499	6023210	D	R	0.007	0.273515	0.45724	DEL/PAV
D7_6023212_28	6023212	D28	<R>	0.6	0.217053	0.00356739	DEL/PAV
D7_6023240_1362	6023240	D1362	<R>	0.593	0.211224	0.00517108	DEL/PAV
D7_6024602_1	6024602	D1	<R>	0.593	0.211224	0.00517108	DEL/PAV
D7_6024603_2	6024603	D2	<R>	0.047	-0.0805885	0.536212	DEL/PAV
D7_6024605_1	6024605	D1	<R>	0.037	-0.170278	0.236853	DEL/PAV
D7_6024606_1	6024606	D1	<R>	0.034	-0.153803	0.307567	DEL/PAV
D7_6024607_1	6024607	D1	<R>	0.027	0.0112223	0.946087	DEL/PAV
D7_6024608_1	6024608	D1	<R>	0.027	0.0112223	0.946087	DEL/PAV
D7_6024609_1	6024609	D1	<R>	0.027	0.0112223	0.946087	DEL/PAV
D7_6024610_1	6024610	D1	<R>	0.02	0.0604055	0.772871	DEL/PAV
D7_6024611_1	6024611	D1	<R>	0.02	0.0604055	0.772871	DEL/PAV
D7_6024612_1	6024612	D1	<R>	0.02	0.0604055	0.772871	DEL/PAV
D7_6024613_1	6024613	D1	<R>	0.017	0.220167	0.348945	DEL/PAV
D7_6024614_1	6024614	D1	<R>	0.01	0.530283	0.0681778	DEL/PAV
D7_6024615_1	6024615	D1	<R>	0.007	0.334469	0.364748	DEL/PAV
D7_6024616_1	6024616	D1	<R>	0.007	0.334469	0.364748	DEL/PAV
D7_6024617_1	6024617	D1	<R>	0.007	0.334469	0.364748	DEL/PAV
D7_6024618_1	6024618	D1	<R>	0.007	0.334469	0.364748	DEL/PAV
D7_6024619_1	6024619	D1	<R>	0.007	0.334469	0.364748	DEL/PAV
D7_6024620_1	6024620	D1	<R>	0.003	-0.195277	0.70543	DEL/PAV
218356559	6024652	A	T	0.616	0.190138	0.0183582	.
218356566	6024659	C	T	0.616	0.190138	0.0183582	.
218356600	6024693	G	A	0.611	0.184364	0.0228068	.
218356606	6024699	T	A	0.582	0.174902	0.0294064	.
218356607	6024700	C	T	0.578	0.175461	0.0281744	.
218356609	6024702	A	G	0.584	0.182506	0.0219493	.
218356614_T	6024707	V	R	0.304	0.138338	0.0352481	indel
218356621	6024714	T	C	0.582	0.188603	0.0181125	.
218356639_AG	6024732	V	R	0.094	0.128363	0.219027	indel
218356700_A	6024793	V	R	0.497	0.147501	0.0242662	indel
218356702	6024795	T	C	0.615	0.196388	0.0148598	.
218356731	6024824	C	A	0.617	0.208088	0.00987668	.
218356736	6024829	C	T	0.617	0.208088	0.00987668	.
218356754	6024847	C	A	0.616	0.212308	0.00836465	.
218356788	6024881	G	A	0.611	0.189771	0.0190759	.
218356793	6024886	A	G	0.61	0.186591	0.0209601	.
218356812	6024905	G	C	0.605	0.196534	0.0129424	.
218356816_1	6024909	V	R	0.412	0.0639357	0.331799	indel
218356833	6024926	A	T	0.609	0.165931	0.0367402	.
218356839	6024932	C	T	0.612	0.165076	0.0389371	.
218356849	6024942	T	A	0.561	0.159861	0.0427186	.
218356852_T	6024945	V	R	0.373	0.0980996	0.120032	indel
218356934	6025027	T	C	0.595	0.182173	0.0225198	.
218356968	6025061	T	A	0.562	0.189787	0.0164693	.
218357019_GTA	6025112	V	R	0.034	0.040678	0.814926	indel
218357032	6025125	A	G	0.502	0.219628	0.00723371	.
218357039	6025132	C	T	0.584	0.176117	0.0285814	.
218357043	6025136	A	G	0.589	0.189027	0.0188465	.
218357072_1	6025165	V	R	0.316	0.0262717	0.684368	indel
218357081_GTG	6025174	V	R	0.359	0.0620743	0.334764	indel
218357091	6025184	A	T	0.61	0.21385	0.00833623	.
218357106	6025199	A	C	0.606	0.205603	0.010916	.
218357119_1	6025212	V	R	0.443	0.122114	0.068765	indel
218357126	6025219	C	T	0.604	0.194939	0.0155736	.
218357150	6025243	T	C	0.613	0.206754	0.0100645	.
218357160	6025253	A	G	0.611	0.204449	0.0107985	.
218357193	6025286	T	C	0.597	0.205754	0.00955979	.
218357197_TA	6025290	V	R	0.32	0.02144	0.742869	indel
218357263_TA	6025356	V	R	0.426	0.153334	0.0162321	indel
218357270_1	6025363	V	R	0.435	0.134517	0.0339052	indel
218357313_TA	6025406	V	R	0.382	0.170615	0.00739437	indel
218357333	6025426	G	C	0.605	0.19874	0.014218	.
218357359_GCCCA	6025452	V	R	0.246	0.20264	0.00452007	indel
218357380	6025473	T	C	0.6	0.217437	0.00702221	.
218357392_2	6025485	V	R	0.377	0.07773	0.226235	indel
218357415	6025508	C	T	0.612	0.194357	0.0166347	.
218357427	6025520	A	G	0.613	0.201597	0.0131784	.
218357432	6025525	A	G	0.613	0.207677	0.0110191	.
218357449	6025542	A	G	0.617	0.205742	0.0111352	.
218357466	6025559	C	A	0.616	0.18741	0.0195277	.
218357471	6025564	C	G	0.612	0.196115	0.0149813	.
218357509	6025602	C	T	0.614	0.205986	0.0106842	.
218357520	6025613	C	T	0.614	0.205368	0.0106298	.
218357543	6025636	T	C	0.615	0.221383	0.00581848	.
218357551	6025644	A	G	0.616	0.194774	0.015287	.
218357587	6025680	G	A	0.614	0.211404	0.00856898	.
218357704	6025797	A	G	0.024	-0.13589	0.547643	.
218357740	6025833	G	A	0.619	0.228735	0.00421146	.
218357741	6025834	C	T	0.619	0.219654	0.00587163	.
218357755	6025848	A	G	0.617	0.194025	0.0134898	.
218357814	6025907	A	C	0.624	0.211046	0.00854548	.
218357821	6025914	A	C	0.606	0.180857	0.0229889	.
218357830	6025923	C	T	0.624	0.211046	0.00854548	.
218357849	6025942	G	A	0.621	0.225676	0.00506122	.
218357865_A	6025958	V	R	0.527	0.134181	0.051372	indel
218357873	6025966	A	T	0.626	0.208199	0.00942525	.
218357913_T	6026006	V	R	0.519	0.154275	0.0318207	indel
218358419	6026512	A	G	0.625	0.21165	0.0087949	.
DEL_449503	6026529	D	R	0.003	0.0809271	0.8833	DEL/PAV
D7_6026531_13	6026531	D13	<R>	0.003	0.0809271	0.8833	DEL/PAV
218358478	6026571	T	C	0.604	0.18976	0.0167476	.
218358524	6026617	G	A	0.623	0.221285	0.0058117	.
218358540	6026633	C	G	0.604	0.185409	0.0190104	.
218358541	6026634	A	C	0.605	0.184511	0.0204671	.
218358579	6026672	T	C	0.603	0.188497	0.0177949	.
218358693	6026786	T	C	0.624	0.218089	0.00679921	.
218358754	6026847	G	A	0.615	0.196569	0.0133584	.
218358802	6026895	A	G	0.616	0.19416	0.0147365	.
218358846	6026939	G	A	0.607	0.237511	0.0025558	.
218358875	6026968	G	A	0.616	0.189831	0.0173943	.
218358905	6026998	A	G	0.074	-0.274506	0.02891	.
218358907	6027000	A	T	0.614	0.182607	0.0200267	.
218358911	6027004	T	C	0.596	0.160353	0.0423492	.
218359492	6027585	T	C	0.596	0.241085	0.00296693	.
218359529	6027622	G	A	0.598	0.182283	0.0242028	.
218359602	6027695	A	G	0.558	0.149488	0.058392	.
218359669	6027762	G	A	0.594	0.204314	0.0110288	.
218359744_TTAGG	6027837	V	R	0.183	0.0282717	0.724529	indel
218359752	6027845	A	T	0.587	0.210628	0.008791	.
218359783	6027876	A	T	0.609	0.171311	0.0334292	.
218359786	6027879	A	G	0.612	0.16586	0.0398919	.
218359961	6028054	T	C	0.603	0.181955	0.0222768	.
218359981_TT	6028074	V	R	0.514	0.19813	0.00545389	indel
218359981_TTT	6028074	V	R	0.017	0.305113	0.252272	indel
218360074	6028167	A	G	0.624	0.215405	0.00759829	.
218360202	6028295	A	G	0.614	0.23581	0.00384035	.
218360233	6028326	C	T	0.638	0.225551	0.00575388	.
218360259	6028352	T	C	0.604	0.184356	0.0216497	.
218360354_AAATCCTAAAGATA	6028447	V	R	0.5	0.196526	0.00394777	indel
218360753	6028846	T	C	0.624	0.215914	0.0073429	.
218360866	6028959	G	A	0.617	0.194193	0.0149176	.
218361029	6029122	T	C	0.607	0.183411	0.0212029	.
218361174	6029267	T	C	0.624	0.215914	0.0073429	.
218361211	6029304	T	C	0.602	0.189236	0.0169762	.
218361274	6029367	T	C	0.599	0.16713	0.034744	.
218361385_3	6029478	V	R	0.592	0.212242	0.00417422	indel
218361444	6029537	C	T	0.602	0.178566	0.0231004	.
218361451	6029544	G	A	0.622	0.217587	0.00668034	.
218361630	6029723	A	G	0.213	-0.191713	0.0480683	.
218361671	6029764	T	G	0.602	0.189439	0.0173448	.
218361977	6030070	C	T	0.622	0.214411	0.00787077	.
218361993	6030086	T	C	0.603	0.183015	0.0218519	.
218362006	6030099	A	C	0.619	0.207912	0.00982521	.
218362062	6030155	A	G	0.602	0.197233	0.0129678	.
218362085	6030178	T	G	0.569	0.223471	0.00442962	.
218362208	6030301	T	C	0.607	0.184162	0.021271	.
218362448	6030541	A	G	0.607	0.17485	0.0296862	.
218362523	6030616	G	A	0.631	0.201984	0.0120271	.
218362632	6030725	A	C	0.614	0.173365	0.0304604	.
218362703	6030796	T	C	0.607	0.153134	0.0559191	.
218362707	6030800	T	C	0.608	0.155734	0.0513025	.
218362743	6030836	A	T	0.608	0.132691	0.094534	.
218362821_1	6030914	V	R	0.583	0.164364	0.0281842	indel
218363000	6031093	A	C	0.624	0.217257	0.00712261	.
DEL_449505	6031100	D	R	0.247	0.021287	0.762268	DEL/PAV
218363008_24	6031101	V	R	0.248	0.0129019	0.854647	indel
D7_6031102_24	6031102	D24	<R>	0.247	0.021287	0.762268	DEL/PAV
218363221	6031314	G	A	0.627	0.197523	0.01417	.
218363268	6031361	G	T	0.625	0.198172	0.0137221	.
218363282	6031375	A	G	0.607	0.149675	0.0580986	.
218363317	6031410	C	G	0.487	0.130707	0.121734	.
218363318_C	6031411	V	R	0.157	0.179506	0.0279469	indel
218363319_1	6031412	V	R	0.071	0.098998	0.444703	indel
218363319_A	6031412	V	R	0.028	-0.23273	0.186417	indel
218363338	6031431	C	T	0.613	0.156968	0.0454917	.
218363344	6031437	C	T	0.631	0.184151	0.0214445	.
218363367_TTT	6031460	V	R	0.375	0.0784437	0.221278	indel
218363367_TTTT	6031460	V	R	0.046	0.256434	0.0761676	indel
218363463	6031556	G	A	0.632	0.194867	0.015565	.
218363626	6031719	C	T	0.628	0.192337	0.0171718	.
218363668	6031761	T	C	0.631	0.206721	0.0102212	.
218363721	6031814	A	G	0.627	0.175793	0.0280798	.
218363724_T	6031817	V	R	0.436	0.102942	0.113908	indel
218363772_TC	6031865	V	R	0.334	0.049923	0.463452	indel
218363776_T	6031869	V	R	0.027	0.526557	0.00532965	indel
218363776_TTT	6031869	V	R	0.032	-0.187792	0.357403	indel
218363789_2	6031882	V	R	0.038	-0.0394083	0.838324	indel
218363790_1	6031883	V	R	0.419	0.0357445	0.605351	indel
218363843	6031936	A	G	0.629	0.192352	0.0174143	.
218363844	6031937	A	G	0.627	0.184064	0.0226281	.
218363846	6031939	A	G	0.629	0.181172	0.0255229	.
218363861_C	6031954	V	R	0.507	0.135718	0.0383674	indel
218363891	6031984	C	T	0.631	0.197309	0.0130752	.
218363900	6031993	A	T	0.634	0.206664	0.00933943	.
218363915	6032008	G	A	0.043	-0.148378	0.546323	.
218363935	6032028	A	C	0.599	0.165846	0.0371732	.
218363940_T	6032033	V	R	0.418	0.0593967	0.355616	indel
218363948_1	6032041	V	R	0.053	-0.309526	0.0195874	indel
218364001_1	6032094	V	R	0.452	0.169243	0.00864821	indel
218364034	6032127	T	C	0.618	0.237099	0.00322288	.
218364048	6032141	G	A	0.626	0.193641	0.0156769	.
218364127	6032220	C	T	0.629	0.196869	0.014397	.
218364181	6032274	T	G	0.604	0.144619	0.0687146	.
218364252	6032345	G	A	0.626	0.214937	0.0077047	.
218364276	6032369	G	A	0.624	0.211316	0.00851638	.
218364353_1	6032446	V	R	0.502	0.149212	0.0279251	indel
218364456	6032549	T	C	0.628	0.201607	0.0125894	.
218364469	6032562	C	T	0.631	0.202481	0.0121483	.
218364489	6032582	C	T	0.631	0.202481	0.0121483	.
218364553	6032646	C	T	0.6	0.153865	0.0507824	.
218364637	6032730	T	C	0.617	0.216154	0.0067813	.
218364719_1	6032812	V	R	0.588	0.170793	0.0192595	indel
218364781	6032874	T	C	0.608	0.17441	0.0290682	.
218364913	6033006	T	C	0.604	0.183571	0.0202036	.
218364960	6033053	C	A	0.604	0.190485	0.0162357	.
218365137	6033230	A	G	0.613	0.195784	0.012317	synonymous_variant
218365237	6033330	C	A	0.631	0.202481	0.0121483	intron_variant
218365308	6033401	C	T	0.631	0.202481	0.0121483	intron_variant
218365664	6033757	T	C	0.61	0.188181	0.0181085	intron_variant
218365720	6033813	A	G	0.608	0.159485	0.0452964	intron_variant
218365736	6033829	T	C	0.608	0.172654	0.0299286	splice_region_variant
218365873	6033966	A	G	0.629	0.200226	0.0130664	.
218365888	6033981	G	A	0.631	0.202481	0.0121483	.
218365908	6034001	C	T	0.629	0.200226	0.0130664	.
218365914	6034007	T	C	0.627	0.189817	0.0185138	.
218366037	6034130	G	A	0.629	0.219842	0.00633088	.
218366365_4	6034458	V	R	0.534	0.228854	0.00035309	indel
218366377	6034470	C	T	0.629	0.196512	0.0148333	.
218366396	6034489	A	G	0.629	0.206283	0.0105091	.
218366606	6034699	G	T	0.625	0.21521	0.00790875	.
218366674	6034767	A	C	0.609	0.177045	0.0258319	.
218366711	6034804	A	G	0.623	0.225611	0.00491407	.
218366742	6034835	G	A	0.614	0.205305	0.0106803	.
218366753	6034846	G	T	0.614	0.203315	0.0124211	.
218366788	6034881	T	G	0.62	0.208762	0.0095598	.
218366793	6034886	A	G	0.622	0.202294	0.0122074	.
218366810	6034903	C	A	0.625	0.210147	0.0089884	.
218366847	6034940	G	A	0.602	0.175348	0.0257833	.
218366849	6034942	A	G	0.603	0.169929	0.0313599	.
218366912_1	6035005	V	R	0.512	0.0891376	0.206945	indel
218366920	6035013	A	G	0.104	-0.219036	0.0756527	.
218366937	6035030	T	C	0.63	0.216963	0.0074821	.
218366968	6035061	T	C	0.112	-0.239215	0.0673959	.
218367006	6035099	G	T	0.625	0.191846	0.0168549	.
218367047	6035140	G	A	0.625	0.174821	0.0310752	.
218367057	6035150	A	C	0.621	0.16734	0.0372508	.
218367109_C	6035202	V	R	0.459	0.123291	0.0556394	indel
218367132	6035225	G	A	0.623	0.187397	0.0194046	.
218367149	6035242	T	A	0.621	0.213041	0.00802314	.
218367163	6035256	T	C	0.625	0.213511	0.00876611	.
218367182	6035275	T	C	0.625	0.204035	0.0115163	.
218367222	6035315	T	A	0.631	0.200103	0.0135094	.
218367416	6035509	G	A	0.628	0.18613	0.0202491	.
218367641	6035734	T	C	0.546	0.176119	0.0247906	.
218367665	6035758	T	C	0.631	0.202481	0.0121483	.
218367809	6035902	A	C	0.625	0.187457	0.0203608	.
218367826_4	6035919	V	R	0.278	0.156322	0.0204132	indel
218368026	6036119	C	G	0.621	0.180169	0.0253759	missense
218368027	6036120	T	C	0.615	0.188154	0.0199205	missense
DEL_449506	6036384	D	R	0.003	0.0730321	0.847538	DEL/PAV
D7_6036386_33	6036386	D33	<R>	0.003	0.0730321	0.847538	DEL/PAV
218368701_T	6036794	V	R	0.571	0.131328	0.0748777	indel
218368711_T	6036804	V	R	0.585	0.21294	0.00436335	indel
218368814	6036907	A	G	0.631	0.20992	0.00887705	intron_variant
218369367_1	6037460	V	R	0.597	0.196448	0.00714359	indel
218370163	6038256	C	T	0.631	0.204304	0.0112096	intron_variant
218370336_1	6038429	V	R	0.605	0.159033	0.0402543	indel
218371034	6039127	C	T	0.606	0.174168	0.0281194	intron_variant
218371646_4	6039739	V	R	0.612	0.223194	0.00324836	indel
218372433	6040526	C	T	0.63	0.194578	0.0158115	intron_variant
218372446	6040539	C	A	0.606	0.154935	0.050331	intron_variant
218372503	6040596	C	T	0.62	0.160797	0.0411741	intron_variant
218372581	6040674	C	T	0.631	0.202481	0.0121483	intron_variant
218372615	6040708	C	T	0.628	0.211085	0.00881178	intron_variant
218372832	6040925	T	A	0.628	0.196278	0.0147215	intron_variant
218373686	6041779	C	T	0.627	0.200152	0.0126174	splice_region_variant
218374317	6042410	T	C	0.612	0.17159	0.0318032	synonymous_variant
218374383_1	6042476	V	R	0.407	0.0783686	0.225656	indel
218374383_2	6042476	V	R	0.042	0.383385	0.0149741	indel
218374438	6042531	G	T	0.631	0.198224	0.0135537	intron_variant
218374442	6042535	G	T	0.631	0.197052	0.0147859	intron_variant
218374734	6042827	T	A	0.609	0.17525	0.0286694	splice_region_variant
218374850_1	6042943	V	R	0.62	0.198247	0.0115248	indel
218375931	6044024	T	C	0.612	0.171309	0.0319244	synonymous_variant
218376042	6044135	A	C	0.627	0.186151	0.020747	3_prime_UTR_variant
218376332	6044425	T	C	0.629	0.197453	0.0143384	3_prime_UTR_variant
218376347	6044440	A	G	0.628	0.204054	0.0113926	3_prime_UTR_variant
218376355	6044448	T	C	0.626	0.19988	0.0128944	3_prime_UTR_variant
218376386	6044479	G	A	0.602	0.194814	0.0164718	3_prime_UTR_variant
DEL_449508	6044494	D	R	0.037	0.302257	0.0329214	DEL/PAV
D7_6044496_41	6044496	D41	<R>	0.037	0.302257	0.0329214	DEL/PAV
218376443	6044536	C	T	0.612	0.19217	0.0160057	3_prime_UTR_variant
218376605	6044698	C	T	0.624	0.214414	0.00789431	.
218376671	6044764	C	G	0.596	0.222948	0.00546677	.
218376679	6044772	G	A	0.606	0.20502	0.0105514	.
218376722	6044815	A	G	0.579	0.183567	0.0239481	.
218377265	6045358	A	G	0.058	-0.0151647	0.923518	.
218377355	6045448	T	C	0.612	0.143263	0.0716589	.
218377371	6045464	A	G	0.616	0.155245	0.0523009	.
218377738	6045831	T	A	0.611	0.158814	0.0450235	.
218378330	6046423	C	T	0.633	0.213751	0.00742773	.
218378394	6046487	A	G	0.617	0.161118	0.042894	.
218378402	6046495	C	T	0.634	0.199624	0.0132386	.
218378444	6046537	G	A	0.66	0.134586	0.0942768	.
218378469	6046562	G	A	0.539	0.168596	0.0604777	.
218378496_1	6046589	V	R	0.031	0.121507	0.613227	indel
218378561_TATG	6046654	V	R	0.488	0.0591676	0.357606	indel
218378599	6046692	C	T	0.629	0.200192	0.0126815	.
218378650	6046743	C	T	0.611	0.169908	0.0298742	.
218378688_T	6046781	V	R	0.6	0.181109	0.0142763	indel
218378699	6046792	T	C	0.634	0.199624	0.0132386	.
218378728	6046821	T	C	0.634	0.199624	0.0132386	.
218378964	6047057	T	C	0.613	0.173973	0.0264397	.
218378976	6047069	T	C	0.609	0.166647	0.0340396	.
218378989	6047082	A	G	0.611	0.169003	0.0316935	.
218379061	6047154	A	G	0.126	-0.204466	0.071528	.
DEL_449512	6047410	D	R	0.024	0.0166925	0.928708	DEL/PAV
D7_6047412_103	6047412	D103	<R>	0.024	0.0166925	0.928708	DEL/PAV
218379413_7	6047506	V	R	0.392	0.102047	0.111559	indel
218379487_1	6047580	V	R	0.019	-0.204139	0.531716	indel
218379490_CT	6047583	V	R	0.09	-0.0152609	0.919393	indel
DEL_449513	6047596	D	R	0.095	-0.0730407	0.464361	DEL/PAV
D7_6047598_1	6047598	D1	<R>	0.095	-0.0730407	0.464361	DEL/PAV
D7_6047599_30	6047599	D30	<R>	0.095	-0.0730407	0.464361	DEL/PAV
218379523_4	6047616	V	R	0.131	-0.0986901	0.468491	indel
218379602_5	6047695	V	R	0.053	0.0665757	0.738082	indel
DEL_449514	6047701	D	R	0.092	-0.0349498	0.748204	DEL/PAV
218379609_21	6047702	V	R	0.029	0.282814	0.269655	indel
D7_6047703_21	6047703	D21	<R>	0.092	-0.0349498	0.748204	DEL/PAV
218379640_AG	6047733	V	R	0.024	-0.282139	0.310895	indel
218379644_T	6047737	V	R	0.097	0.167938	0.247021	indel
218379666_2	6047759	V	R	0.107	0.19064	0.179185	indel
218379799_A	6047892	V	R	0.092	0.0682932	0.635682	indel
218379815_4	6047908	V	R	0.056	0.179953	0.354322	indel
DEL_449515	6048001	D	R	0.003	0.281431	0.561561	DEL/PAV
D7_6048003_24	6048003	D24	<R>	0.003	0.281431	0.561561	DEL/PAV
218379928_AT	6048021	V	R	0.022	-0.240404	0.416619	indel
218379958_1	6048051	V	R	0.103	-0.142566	0.384736	indel
218379979_TTAA	6048072	V	R	0.105	-0.18763	0.244611	indel
218379997_5	6048090	V	R	0.031	0.274156	0.246902	indel
218380012_CAC	6048105	V	R	0.1	-0.210271	0.195445	indel
218380058_9	6048151	V	R	0.054	-0.176536	0.324562	indel
218380226	6048319	A	G	0.617	0.161442	0.0428164	.
218380336_TT	6048429	V	R	0.556	0.1518	0.0347285	indel
218380386_3	6048479	V	R	0.313	0.0466449	0.498908	indel
218380583_A	6048676	V	R	0.602	0.224263	0.00357921	indel
218380704	6048797	T	C	0.634	0.199624	0.0132386	.
218380814	6048907	G	C	0.614	0.161967	0.0417759	.
218381313	6049406	G	A	0.637	0.199227	0.0134369	.
218381374	6049467	C	T	0.638	0.189296	0.0194009	.
DEL_449519	6049504	D	R	0.014	0.397626	0.0985705	DEL/PAV
D7_6049506_26	6049506	D26	<R>	0.014	0.397626	0.0985705	DEL/PAV
218381630	6049723	C	A	0.63	0.199044	0.0133448	.
218381645	6049738	T	C	0.605	0.170228	0.0318322	.
218381699	6049792	A	G	0.614	0.174264	0.0287717	.
218381835	6049928	C	T	0.636	0.196152	0.0147621	.
218381866	6049959	T	C	0.612	0.174113	0.0306082	.
218381998	6050091	C	T	0.634	0.203137	0.0119805	.
218382051	6050144	A	G	0.631	0.20594	0.0107606	.
218382077	6050170	G	T	0.631	0.211582	0.00876584	.
218382171	6050264	T	C	0.634	0.199624	0.0132386	.
218382190	6050283	T	C	0.634	0.199624	0.0132386	.
218382195	6050288	G	A	0.634	0.199624	0.0132386	.
218382466	6050559	T	C	0.634	0.215732	0.00751816	.
218382674	6050767	G	A	0.626	0.203755	0.0108689	.
218382681_C	6050774	V	R	0.572	0.139237	0.0496458	indel
218382748	6050841	T	G	0.635	0.194547	0.0158923	.
218382788_TTACTAGTTTACTCCAC	6050881	V	R	0.076	0.24256	0.0313163	indel
218382812	6050905	T	C	0.605	0.184741	0.0200519	.
218382814	6050907	A	G	0.625	0.23387	0.00377803	.
218382881_1	6050974	V	R	0.366	0.158614	0.0168302	indel
218382907	6051000	C	A	0.614	0.188575	0.0177288	.
218382962_10	6051055	V	R	0.116	0.0373869	0.686814	indel
218382993_1	6051086	V	R	0.211	-0.0264833	0.718345	indel
218383032	6051125	T	C	0.606	0.166858	0.0421673	.
218383160_1	6051253	V	R	0.322	0.105494	0.1092	indel
218383546	6051639	C	G	0.634	0.199624	0.0132386	intron_variant
218384740	6052833	C	T	0.633	0.198805	0.0141667	intron_variant
218384741	6052834	A	G	0.633	0.198805	0.0141667	intron_variant
218384801	6052894	A	G	0.621	0.198353	0.0119375	intron_variant
218384812	6052905	T	C	0.612	0.147986	0.0591474	intron_variant
218384814	6052907	T	C	0.634	0.207244	0.00985678	intron_variant
218384984	6053077	A	G	0.627	0.215781	0.00729077	intron_variant
218385460	6053553	T	A	0.634	0.199624	0.0132386	intron_variant
218385666	6053759	G	T	0.114	-0.242617	0.0590107	intron_variant
218387748	6055841	G	A	0.634	0.196188	0.0154361	intron_variant
218387897	6055990	G	A	0.629	0.190904	0.0168081	intron_variant
218388413	6056506	T	C	0.631	0.194377	0.0163856	intron_variant
218389153	6057246	A	T	0.617	0.198404	0.0125281	intron_variant
218389806	6057899	G	T	0.607	0.155294	0.0479787	intron_variant
218390066_2	6058159	V	R	0.491	0.0859226	0.184312	indel
218390221	6058314	A	G	0.639	0.178352	0.0252644	intron_variant
218390500	6058593	C	T	0.625	0.209677	0.00839031	intron_variant
218391043	6059136	T	G	0.61	0.148138	0.058958	intron_variant
218391673	6059766	T	C	0.607	0.141829	0.0685149	synonymous_variant
218391886_1	6059979	V	R	0.634	0.199624	0.0132386	indel
218391927_4	6060020	V	R	0.61	0.190097	0.0127102	indel
218392686	6060779	G	T	0.636	0.202539	0.0123325	.
218393071	6061164	A	C	0.631	0.186138	0.020193	.
D7_6061523_4	6061523	D4	<R>	0.003	0.347757	0.52306	DEL/PAV
DEL_449526	6061525	D	R	0.014	-0.0574562	0.84312	DEL/PAV
D7_6061527_1	6061527	D1	<R>	0.01	-0.283694	0.371283	DEL/PAV
D7_6061528_13	6061528	D13	<R>	0.014	-0.0574562	0.84312	DEL/PAV
D7_6061541_411	6061541	D411	<R>	0.014	-0.0574562	0.84312	DEL/PAV
218393841	6061934	T	C	0.649	0.198719	0.0143217	.
218393850	6061943	G	T	0.648	0.189873	0.0184728	.
D7_6061952_36	6061952	D36	<R>	0.014	-0.0574562	0.84312	DEL/PAV
D7_6061988_260	6061988	D260	<R>	0.014	-0.0574562	0.84312	DEL/PAV
218393903	6061996	G	A	0.637	0.182967	0.0224232	.
218393927	6062020	A	G	0.611	0.0900348	0.251224	.
218394092	6062185	A	G	0.626	0.228551	0.00417017	.
218394104	6062197	A	G	0.621	0.146391	0.0614529	.
218394133	6062226	C	T	0.633	0.237366	0.00315742	.
218394135	6062228	A	C	0.621	0.225729	0.00452232	.
D7_6062248_1	6062248	D1	<R>	0.01	-0.193464	0.548377	DEL/PAV
D7_6062249_1	6062249	D1	<R>	0.007	-0.518677	0.149553	DEL/PAV
D7_6062250_3	6062250	D3	<R>	0.007	-0.518677	0.149553	DEL/PAV
DEL_449530	6062358	D	R	0.003	0.501279	0.281497	DEL/PAV
D7_6062360_316	6062360	D316	<R>	0.003	0.501279	0.281497	DEL/PAV
218394410	6062503	C	A	0.632	0.197641	0.0129433	.
218394555_1	6062648	V	R	0.595	0.11474	0.126871	indel
DEL_449531	6062674	D	R	0.014	0.677459	0.00604098	DEL/PAV
218394582_19	6062675	V	R	0.379	0.0567773	0.362665	indel
D7_6062676_19	6062676	D19	<R>	0.017	0.628421	0.00351141	DEL/PAV
D7_6062695_331	6062695	D331	<R>	0.003	0.501279	0.281497	DEL/PAV
218394612	6062705	C	T	0.633	0.193905	0.0149606	.
218394651	6062744	G	T	0.638	0.195368	0.014565	.
218394816	6062909	A	T	0.638	0.191658	0.0168919	missense
DEL_449532	6063024	D	R	0.559	0.226492	0.000777014	DEL/PAV
218394932_10	6063025	V	R	0.626	0.2086	0.00872056	indel
D7_6063026_10	6063026	D10	<R>	0.563	0.241591	0.00036912	DEL/PAV
D7_6063036_150	6063036	D150	<R>	0.003	0.501279	0.281497	DEL/PAV
DEL_449533	6063184	D	R	0.203	0.332749	7.62536e-05	DEL/PAV
D7_6063186_2	6063186	D2	<R>	0.203	0.321732	0.000106036	DEL/PAV
D7_6063188_32	6063188	D32	<R>	0.207	0.345176	3.67965e-05	DEL/PAV
D7_6063220_3	6063220	D3	<R>	0.007	0.537902	0.10634	DEL/PAV
D7_6063223_465	6063223	D465	<R>	0.003	0.501279	0.281497	DEL/PAV
218395210	6063303	T	G	0.302	0.394097	4.23944e-06	synonymous_variant
218395438	6063531	G	T	0.332	0.424827	6.27723e-07	synonymous_variant
218395761	6063854	A	T	0.305	0.41721	1.58201e-06	intron_variant
218395893_A	6063986	V	R	0.219	0.25325	0.00289233	indel
218395966	6064059	T	C	0.341	0.474797	3.38505e-08	intron_variant
218396005	6064098	C	T	0.343	0.461485	5.42627e-08	intron_variant
218396170	6064263	T	C	0.329	0.471503	4.79468e-08	intron_variant
218396210	6064303	G	A	0.336	0.445204	1.51899e-07	intron_variant
218396277	6064370	A	G	0.338	0.472624	4.20321e-08	intron_variant
218396541	6064634	C	T	0.325	0.450888	1.60267e-07	intron_variant
218396653	6064746	C	A	0.333	0.44024	2.55455e-07	intron_variant
218397001	6065094	G	A	0.33	0.4487	2.13891e-07	intron_variant
218397073	6065166	G	A	0.334	0.453853	1.20074e-07	intron_variant
218397243	6065336	A	T	0.339	0.432795	4.24402e-07	intron_variant
218397245	6065338	G	A	0.324	0.415762	2.22936e-06	intron_variant
218397780	6065873	G	A	0.338	0.456404	1.082e-07	intron_variant
218398000_1	6066093	V	R	0.236	0.312496	0.000601651	indel
218398071_4	6066164	V	R	0.351	-0.0426324	0.526966	indel
218398071_GA	6066164	V	R	0.057	0.193361	0.186186	indel
218398410	6066503	A	G	0.027	0.404366	0.123611	intron_variant
218398478_1	6066571	V	R	0.31	0.381039	4.74724e-06	indel
218398497	6066590	C	T	0.342	0.466905	6.01494e-08	intron_variant
218398610	6066703	T	G	0.332	0.409037	2.08012e-06	intron_variant
218399762	6067855	A	G	0.349	0.475199	3.76308e-08	synonymous_variant
218399978_ACGCGAAAAGTCGG	6068071	V	R	0.216	0.320586	0.000130226	indel
218400185_A	6068278	V	R	0.29	0.324874	7.4943e-05	indel
218400439	6068532	G	A	0.341	0.443529	1.64443e-07	intron_variant
218401036_GCGGCGGCGGCG	6069129	V	R	0.038	0.14884	0.347445	indel
218401134	6069227	C	T	0.345	0.47408	4.16306e-08	3_prime_UTR_variant
218401173	6069266	C	T	0.346	0.450491	1.24366e-07	3_prime_UTR_variant
218401192_6	6069285	V	R	0.26	0.220176	0.0072768	indel
218401286	6069379	C	G	0.347	0.484425	1.53413e-08	.
218401747_A	6069840	V	R	0.292	0.366706	4.47634e-06	indel
218402038	6070131	C	T	0.346	0.488747	1.36153e-08	.
DEL_449535	6070240	D	R	0.068	0.285979	0.0131873	DEL/PAV
218402148_24	6070241	V	R	0.041	0.292162	0.0485815	indel
D7_6070242_8	6070242	D8	<R>	0.068	0.285979	0.0131873	DEL/PAV
D7_6070250_16	6070250	D16	<R>	0.068	0.285979	0.0131873	DEL/PAV
218402181	6070274	A	G	0.311	0.386072	9.75432e-06	.
218402256_T	6070349	V	R	0.281	0.27553	0.000393006	indel
218402265	6070358	T	C	0.344	0.471446	4.20738e-08	.
218402269_A	6070362	V	R	0.206	-0.0594854	0.480485	indel
218402273	6070366	T	A	0.344	0.47262	4.40748e-08	.
218402324	6070417	T	C	0.323	0.419146	1.02629e-06	.
218402325	6070418	C	T	0.343	0.478734	2.8351e-08	.
218402400_6	6070493	V	R	0.194	0.104174	0.216372	indel
218402586_T	6070679	V	R	0.188	0.163209	0.0544051	indel
218402920	6071013	T	A	0.322	0.438852	3.84814e-07	.
D7_6071259_2	6071259	D2	<R>	0.003	0.356637	0.450709	DEL/PAV
D7_6071261_2	6071261	D2	<R>	0.007	0.141833	0.698926	DEL/PAV
D7_6071263_3	6071263	D3	<R>	0.007	0.141833	0.698926	DEL/PAV
D7_6071266_1	6071266	D1	<R>	0.007	0.141833	0.698926	DEL/PAV
D7_6071267_1	6071267	D1	<R>	0.007	0.141833	0.698926	DEL/PAV
D7_6071268_2	6071268	D2	<R>	0.007	0.141833	0.698926	DEL/PAV
D7_6071270_1	6071270	D1	<R>	0.007	0.141833	0.698926	DEL/PAV
D7_6071271_2	6071271	D2	<R>	0.01	-0.112218	0.711647	DEL/PAV
218403179_1	6071272	V	R	0.263	0.289159	0.000239231	indel
D7_6071273_6	6071273	D6	<R>	0.01	-0.112218	0.711647	DEL/PAV
D7_6071279_1	6071279	D1	<R>	0.014	0.0561399	0.827145	DEL/PAV
D7_6071280_1	6071280	D1	<R>	0.014	0.0561399	0.827145	DEL/PAV
D7_6071281_2	6071281	D2	<R>	0.014	0.0561399	0.827145	DEL/PAV
D7_6071283_1	6071283	D1	<R>	0.014	0.0561399	0.827145	DEL/PAV
D7_6071284_2	6071284	D2	<R>	0.014	0.0561399	0.827145	DEL/PAV
D7_6071286_2	6071286	D2	<R>	0.017	0.0414986	0.856363	DEL/PAV
D7_6071288_3	6071288	D3	<R>	0.02	0.0768287	0.7203	DEL/PAV
D7_6071291_1	6071291	D1	<R>	0.02	0.0768287	0.7203	DEL/PAV
D7_6071292_1	6071292	D1	<R>	0.024	0.00312672	0.987297	DEL/PAV
D7_6071293_1	6071293	D1	<R>	0.031	-0.0591632	0.738141	DEL/PAV
D7_6071294_1	6071294	D1	<R>	0.031	-0.0591632	0.738141	DEL/PAV
D7_6071295_1	6071295	D1	<R>	0.031	-0.0591632	0.738141	DEL/PAV
D7_6071296_1	6071296	D1	<R>	0.037	-0.028916	0.861795	DEL/PAV
D7_6071297_1	6071297	D1	<R>	0.041	0.0220167	0.889696	DEL/PAV
D7_6071298_1	6071298	D1	<R>	0.044	0.034356	0.82033	DEL/PAV
D7_6071299_1	6071299	D1	<R>	0.047	0.0598831	0.682428	DEL/PAV
D7_6071300_1	6071300	D1	<R>	0.047	0.0598831	0.682428	DEL/PAV
D7_6071301_1	6071301	D1	<R>	0.054	0.11074	0.42737	DEL/PAV
DEL_449537	6071301	D	R	0.353	0.467069	3.32913e-08	DEL/PAV
D7_6071302_1	6071302	D1	<R>	0.054	0.11074	0.42737	DEL/PAV
D7_6071303_1	6071303	D1	<R>	0.325	0.425102	1.77402e-07	DEL/PAV
D7_6071304_3965	6071304	D3965	<R>	0.353	0.467069	3.32913e-08	DEL/PAV
D7_6075269_10	6075269	D10	<R>	0.353	0.467069	3.32913e-08	DEL/PAV
D7_6075279_456	6075279	D456	<R>	0.353	0.467069	3.32913e-08	DEL/PAV
D7_6075735_2041	6075735	D2041	<R>	0.353	0.467069	3.32913e-08	DEL/PAV
D7_6077776_85	6077776	D85	<R>	0.353	0.467069	3.32913e-08	DEL/PAV
D7_6077861_1021	6077861	D1021	<R>	0.353	0.467069	3.32913e-08	DEL/PAV
D7_6078882_4188	6078882	D4188	<R>	0.353	0.467069	3.32913e-08	DEL/PAV
D7_6083070_1	6083070	D1	<R>	0.332	0.473117	8.30722e-09	DEL/PAV
D7_6083071_1	6083071	D1	<R>	0.098	0.14833	0.162509	DEL/PAV
D7_6083072_1	6083072	D1	<R>	0.088	0.211479	0.0505036	DEL/PAV
D7_6083073_1	6083073	D1	<R>	0.085	0.183723	0.093413	DEL/PAV
D7_6083074_1	6083074	D1	<R>	0.068	0.208663	0.0819632	DEL/PAV
D7_6083075_1	6083075	D1	<R>	0.068	0.208663	0.0819632	DEL/PAV
D7_6083076_1	6083076	D1	<R>	0.068	0.208663	0.0819632	DEL/PAV
D7_6083077_1	6083077	D1	<R>	0.068	0.208663	0.0819632	DEL/PAV
D7_6083078_1	6083078	D1	<R>	0.061	0.0934911	0.453535	DEL/PAV
D7_6083079_1	6083079	D1	<R>	0.058	0.108773	0.395551	DEL/PAV
D7_6083080_1	6083080	D1	<R>	0.054	0.117372	0.375362	DEL/PAV
D7_6083081_1	6083081	D1	<R>	0.051	0.0680234	0.61748	DEL/PAV
D7_6083082_1	6083082	D1	<R>	0.051	0.0680234	0.61748	DEL/PAV
D7_6083083_1	6083083	D1	<R>	0.051	0.0680234	0.61748	DEL/PAV
D7_6083084_1	6083084	D1	<R>	0.051	0.0680234	0.61748	DEL/PAV
D7_6083085_1	6083085	D1	<R>	0.047	0.0855674	0.539419	DEL/PAV
D7_6083086_1	6083086	D1	<R>	0.044	0.0445218	0.759267	DEL/PAV
D7_6083087_2	6083087	D2	<R>	0.041	0.0392883	0.794528	DEL/PAV
D7_6083089_1	6083089	D1	<R>	0.041	0.0392883	0.794528	DEL/PAV
D7_6083090_1	6083090	D1	<R>	0.031	0.0393927	0.814692	DEL/PAV
D7_6083091_1	6083091	D1	<R>	0.027	0.00326933	0.985174	DEL/PAV
D7_6083092_2	6083092	D2	<R>	0.027	0.00326933	0.985174	DEL/PAV
D7_6083094_1	6083094	D1	<R>	0.027	0.00326933	0.985174	DEL/PAV
D7_6083095_1	6083095	D1	<R>	0.024	-0.104246	0.581233	DEL/PAV
D7_6083096_3	6083096	D3	<R>	0.024	-0.104246	0.581233	DEL/PAV
218415006_T	6083099	V	R	0.297	0.448118	4.05427e-08	indel
D7_6083099_1	6083099	D1	<R>	0.024	-0.104246	0.581233	DEL/PAV
D7_6083100_1	6083100	D1	<R>	0.02	-0.0583698	0.784889	DEL/PAV
D7_6083101_1	6083101	D1	<R>	0.017	-0.105417	0.649541	DEL/PAV
D7_6083102_2	6083102	D2	<R>	0.017	-0.105417	0.649541	DEL/PAV
D7_6083104_1	6083104	D1	<R>	0.017	-0.105417	0.649541	DEL/PAV
D7_6083105_2	6083105	D2	<R>	0.014	-0.25031	0.345591	DEL/PAV
D7_6083107_3	6083107	D3	<R>	0.014	-0.25031	0.345591	DEL/PAV
D7_6083110_1	6083110	D1	<R>	0.014	-0.25031	0.345591	DEL/PAV
218415018	6083111	G	A	0.35	0.480904	2.34568e-08	.
D7_6083111_1	6083111	D1	<R>	0.01	-0.145123	0.629599	DEL/PAV
D7_6083112_1	6083112	D1	<R>	0.01	-0.145123	0.629599	DEL/PAV
D7_6083113_1	6083113	D1	<R>	0.01	-0.145123	0.629599	DEL/PAV
D7_6083114_4	6083114	D4	<R>	0.01	-0.145123	0.629599	DEL/PAV
D7_6083118_1	6083118	D1	<R>	0.01	-0.145123	0.629599	DEL/PAV
D7_6083119_1	6083119	D1	<R>	0.01	-0.145123	0.629599	DEL/PAV
218415027	6083120	C	A	0.35	0.475116	2.8042e-08	.
D7_6083120_2	6083120	D2	<R>	0.01	-0.145123	0.629599	DEL/PAV
D7_6083122_1	6083122	D1	<R>	0.01	-0.145123	0.629599	DEL/PAV
D7_6083123_1	6083123	D1	<R>	0.01	-0.145123	0.629599	DEL/PAV
D7_6083124_1	6083124	D1	<R>	0.01	-0.145123	0.629599	DEL/PAV
D7_6083125_2	6083125	D2	<R>	0.01	-0.145123	0.629599	DEL/PAV
D7_6083127_2	6083127	D2	<R>	0.01	-0.145123	0.629599	DEL/PAV
D7_6083129_3	6083129	D3	<R>	0.01	-0.145123	0.629599	DEL/PAV
D7_6083132_1	6083132	D1	<R>	0.01	-0.145123	0.629599	DEL/PAV
D7_6083133_6	6083133	D6	<R>	0.01	-0.145123	0.629599	DEL/PAV
D7_6083139_2	6083139	D2	<R>	0.01	-0.145123	0.629599	DEL/PAV
D7_6083141_9	6083141	D9	<R>	0.01	-0.145123	0.629599	DEL/PAV
D7_6083150_2	6083150	D2	<R>	0.01	-0.145123	0.629599	DEL/PAV
D7_6083152_3	6083152	D3	<R>	0.01	-0.145123	0.629599	DEL/PAV
218415061_T	6083154	V	R	0.298	0.403455	6.09713e-07	indel
D7_6083155_1	6083155	D1	<R>	0.01	-0.145123	0.629599	DEL/PAV
D7_6083156_1	6083156	D1	<R>	0.007	-0.20507	0.566025	DEL/PAV
D7_6083157_5	6083157	D5	<R>	0.007	-0.20507	0.566025	DEL/PAV
D7_6083162_10	6083162	D10	<R>	0.003	-0.640042	0.175947	DEL/PAV
D7_6083172_1	6083172	D1	<R>	0.003	-0.640042	0.175947	DEL/PAV
D7_6083173_1	6083173	D1	<R>	0.003	-0.640042	0.175947	DEL/PAV
D7_6083174_5	6083174	D5	<R>	0.003	-0.640042	0.175947	DEL/PAV
D7_6083179_5	6083179	D5	<R>	0.003	-0.640042	0.175947	DEL/PAV
D7_6083184_8	6083184	D8	<R>	0.003	-0.640042	0.175947	DEL/PAV
D7_6083192_1	6083192	D1	<R>	0.003	-0.640042	0.175947	DEL/PAV
D7_6083193_6	6083193	D6	<R>	0.003	-0.640042	0.175947	DEL/PAV
D7_6083199_6	6083199	D6	<R>	0.003	-0.640042	0.175947	DEL/PAV
D7_6083205_3	6083205	D3	<R>	0.003	-0.640042	0.175947	DEL/PAV
D7_6083208_4	6083208	D4	<R>	0.003	-0.640042	0.175947	DEL/PAV
D7_6083212_2	6083212	D2	<R>	0.003	-0.640042	0.175947	DEL/PAV
D7_6083214_13	6083214	D13	<R>	0.003	-0.640042	0.175947	DEL/PAV
D7_6083227_1	6083227	D1	<R>	0.003	-0.640042	0.175947	DEL/PAV
218415329	6083422	G	A	0.327	0.414601	1.01156e-06	.
218415731	6083824	G	C	0.344	0.463936	7.6057e-08	.
218415874	6083967	A	G	0.327	0.387986	4.9409e-06	.
218415946	6084039	G	A	0.33	0.409515	1.60597e-06	.
218416374	6084467	T	C	0.33	0.420301	6.9943e-07	.
218416443	6084536	C	T	0.345	0.463262	1.00632e-07	.
218416453	6084546	T	G	0.326	0.38802	8.5767e-06	.
218416457	6084550	G	A	0.345	0.472307	4.82511e-08	.
218416635	6084728	C	G	0.325	0.405144	1.78593e-06	.
218416738_AA	6084831	V	R	0.314	0.368666	4.62134e-06	indel
218417057	6085150	T	G	0.344	0.472615	3.14347e-08	.
218417095_1	6085188	V	R	0.286	0.26026	0.00135538	indel
218417167	6085260	A	T	0.33	0.427246	5.16175e-07	.
218417375	6085468	T	C	0.316	0.356048	1.45217e-05	.
218417379_TATTAAA	6085472	V	R	0.106	0.270505	0.00921098	indel
218417477	6085570	A	G	0.324	0.398833	3.90977e-06	.
218417559	6085652	A	G	0.33	0.432156	4.92058e-07	.
218417579	6085672	A	G	0.325	0.404922	1.93154e-06	.
218417597	6085690	G	A	0.336	0.443144	1.52505e-07	.
218417649	6085742	G	T	0.313	0.370885	9.20159e-06	.
218417656	6085749	T	C	0.312	0.409034	1.28885e-06	.
218417670	6085763	C	T	0.327	0.475156	2.87222e-08	.
218417741	6085834	A	G	0.312	0.360369	1.339e-05	.
218417981_1	6086074	V	R	0.176	0.258309	0.00410152	indel
218418124	6086217	T	C	0.346	0.413692	1.30079e-06	.
218418241	6086334	C	T	0.33	0.342085	4.99272e-05	.
218418321	6086414	T	A	0.349	0.451497	1.4594e-07	.
218418332	6086425	C	T	0.329	0.397389	3.72321e-06	.
218418349_GAC	6086442	V	R	0.243	0.253851	0.00243468	indel
218418360	6086453	A	G	0.33	0.417154	7.32735e-07	.
218418396_1	6086489	V	R	0.244	0.279776	0.000625336	indel
218418633	6086726	C	T	0.324	0.440045	2.1211e-07	.
218418830_CT	6086923	V	R	0.276	0.353129	7.38712e-06	indel
218418905	6086998	T	C	0.338	0.515115	2.94246e-09	.
218418929	6087022	G	A	0.336	0.48656	1.75675e-08	.
218418987_1	6087080	V	R	0.258	0.392794	1.63053e-06	indel
218419014	6087107	A	C	0.314	0.416089	1.95911e-06	.
218419015	6087108	G	T	0.334	0.47829	5.63011e-08	.
218419018	6087111	C	T	0.316	0.421538	1.40106e-06	.
218419019	6087112	T	C	0.316	0.421538	1.40106e-06	.
218419105	6087198	C	A	0.345	0.456949	1.03621e-07	.
218419423	6087516	G	A	0.341	0.479039	2.55085e-08	.
218419433_1	6087526	V	R	0.272	0.434308	1.87763e-07	indel
218419480	6087573	A	G	0.345	0.469375	3.61615e-08	.
218419507	6087600	A	C	0.345	0.465261	4.73238e-08	.
218419550	6087643	T	C	0.34	0.487775	2.19851e-08	.
218419580	6087673	G	A	0.344	0.479665	2.33661e-08	.
218419605	6087698	A	G	0.342	0.476054	3.80406e-08	.
218419608	6087701	G	A	0.347	0.482855	1.82129e-08	.
218419618	6087711	C	T	0.341	0.478469	3.52263e-08	.
218419645	6087738	T	G	0.344	0.491914	9.88298e-09	.
218419655	6087748	A	C	0.348	0.477024	2.50887e-08	.
218419668	6087761	G	A	0.345	0.49804	6.94557e-09	.
218419733	6087826	A	G	0.342	0.498361	7.2332e-09	.
218419741	6087834	C	T	0.34	0.496406	7.51336e-09	.
218419789	6087882	C	A	0.344	0.489681	1.37027e-08	.
218419857_1	6087950	V	R	0.3	0.407645	8.31206e-07	indel
218419875_T	6087968	V	R	0.315	0.449568	3.70102e-08	indel
218419893	6087986	G	A	0.347	0.476309	2.96296e-08	.
218419905	6087998	T	C	0.347	0.476309	2.96296e-08	.
218419937	6088030	G	A	0.347	0.498378	7.04688e-09	.
218419953	6088046	A	G	0.332	0.455244	2.4024e-07	.
218419976	6088069	G	A	0.344	0.46535	2.73483e-07	.
218420035	6088128	A	G	0.325	0.475295	2.33068e-08	.
218420045	6088138	T	C	0.326	0.466501	5.0943e-08	.
218420058	6088151	A	G	0.326	0.465513	4.64366e-08	.
218420266	6088359	T	G	0.337	0.413007	9.17075e-07	.
218420292	6088385	C	A	0.324	0.419754	8.78644e-07	.
218420316	6088409	A	T	0.088	-0.118616	0.447376	.
218420464_T	6088557	V	R	0.246	0.378911	9.84901e-06	indel
218420765	6088858	A	T	0.341	0.449321	2.81132e-07	.
218420784_1	6088877	V	R	0.297	0.345599	5.67555e-05	indel
218420939	6089032	A	T	0.342	0.439514	3.74325e-07	.
218420945	6089038	G	A	0.337	0.434303	5.53785e-07	.
218420949	6089042	A	T	0.335	0.438575	4.69604e-07	.
218420960	6089053	G	A	0.345	0.443988	2.78471e-07	.
218421078	6089171	A	G	0.098	-0.0964379	0.426972	.
218421142	6089235	A	C	0.323	0.389059	6.02947e-06	.
218421191	6089284	G	C	0.342	0.450865	2.11528e-07	.
218421281_2	6089374	V	R	0.282	0.387582	5.43583e-06	indel
218421315	6089408	T	C	0.342	0.436148	4.41576e-07	.
218421322	6089415	T	C	0.323	0.356891	3.48616e-05	.
218421546	6089639	C	T	0.325	0.387823	6.91663e-06	.
218421595	6089688	G	A	0.34	0.442611	3.28213e-07	.
218421999	6090092	T	C	0.336	0.432271	6.56601e-07	missense
218422002	6090095	C	T	0.337	0.424705	9.1735e-07	missense
218422006	6090099	T	G	0.339	0.426701	7.43933e-07	synonymous_variant
218422015	6090108	A	G	0.318	0.367303	2.10371e-05	synonymous_variant
218422045	6090138	G	A	0.342	0.4535	1.14148e-07	synonymous_variant
218422228	6090321	T	C	0.323	0.382326	1.05993e-05	synonymous_variant
218422504	6090597	A	G	0.317	0.330067	0.000141351	synonymous_variant
218422605	6090698	G	C	0.306	0.355146	4.5319e-05	missense
218422608	6090701	G	C	0.322	0.383117	9.81584e-06	missense
218422676	6090769	C	T	0.337	0.437761	7.05607e-07	missense
218422900	6090993	G	C	0.34	0.452371	1.78779e-07	missense
218423044	6091137	T	C	0.325	0.387823	6.91663e-06	.
218423128	6091221	A	C	0.342	0.450865	2.11528e-07	.
218423180	6091273	G	A	0.342	0.450865	2.11528e-07	.
218423192_1	6091285	V	R	0.286	0.312242	0.000131582	indel
218423259	6091352	G	A	0.335	0.430366	6.20471e-07	.
218423273	6091366	G	A	0.338	0.439858	3.45867e-07	.
218423436	6091529	A	G	0.323	0.408233	2.49429e-06	.
218423503_A	6091596	V	R	0.298	0.37603	8.85997e-06	indel
218423712_1	6091805	V	R	0.328	0.451264	9.66397e-08	indel
218423779	6091872	T	G	0.325	0.387823	6.91663e-06	.
218423838	6091931	G	A	0.33	0.388424	6.18054e-06	.
218423859	6091952	T	C	0.337	0.45806	1.32609e-07	.
218424098	6092191	G	A	0.34	0.471212	6.70921e-08	.
218424280_A	6092373	V	R	0.272	0.279903	0.000819971	indel
218424327	6092420	A	G	0.316	0.370054	2.31936e-05	.
218424974_TATA	6093067	V	R	0.264	0.272413	0.000654824	indel
218425033	6093126	G	A	0.341	0.436885	4.46022e-07	.
218425292	6093385	G	A	0.324	0.392518	6.16625e-06	.
218425487	6093580	A	G	0.326	0.369163	1.25785e-05	.
218425578	6093671	T	G	0.33	0.396147	3.42617e-06	.
218425815	6093908	T	A	0.33	0.392054	4.21584e-06	.
218425823	6093916	T	C	0.341	0.461687	9.82103e-08	.
218425830	6093923	G	A	0.338	0.457352	1.37381e-07	.
DEL_449543	6094341	D	R	0.173	0.309488	0.000605314	DEL/PAV
218426249_27	6094342	V	R	0.034	-0.10029	0.544148	indel
D7_6094343_4	6094343	D4	<R>	0.173	0.309488	0.000605314	DEL/PAV
D7_6094347_23	6094347	D23	<R>	0.173	0.309488	0.000605314	DEL/PAV
218426303	6094396	C	T	0.337	0.434252	5.22394e-07	.
218426389	6094482	G	A	0.25	0.414361	7.66901e-05	.
218426412_1	6094505	V	R	0.063	-0.000640045	0.996873	indel
DEL_449545	6094627	D	R	0.278	0.389256	4.60524e-06	DEL/PAV
218426535_11	6094628	V	R	0.305	0.408391	1.42051e-06	indel
D7_6094629_11	6094629	D11	<R>	0.278	0.389256	4.60524e-06	DEL/PAV
DEL_449547	6094672	D	R	0.003	0.0135222	0.97801	DEL/PAV
D7_6094674_4	6094674	D4	<R>	0.003	0.0135222	0.97801	DEL/PAV
D7_6094678_21	6094678	D21	<R>	0.003	0.0135222	0.97801	DEL/PAV
218426600	6094693	G	A	0.326	0.470994	1.4583e-07	.
DEL_449548	6094697	D	R	0.003	0.878602	0.093732	DEL/PAV
D7_6094699_18	6094699	D18	<R>	0.007	0.410627	0.247596	DEL/PAV
DEL_449549	6094715	D	R	0.254	0.267805	0.00119051	DEL/PAV
218426623_18	6094716	V	R	0.25	0.289543	0.000830508	indel
D7_6094717_2	6094717	D2	<R>	0.261	0.292049	0.000386509	DEL/PAV
D7_6094719_15	6094719	D15	<R>	0.258	0.265595	0.00120576	DEL/PAV
D7_6094734_1	6094734	D1	<R>	0.254	0.267805	0.00119051	DEL/PAV
218426708	6094801	C	A	0.342	0.450865	2.11528e-07	.
218426802	6094895	C	G	0.342	0.450865	2.11528e-07	.
218426844	6094937	T	G	0.341	0.454931	1.72324e-07	.
218426871	6094964	C	A	0.34	0.450018	2.72179e-07	.
DEL_449550	6095003	D	R	0.007	0.0931155	0.791421	DEL/PAV
D7_6095005_16	6095005	D16	<R>	0.007	0.0931155	0.791421	DEL/PAV
DEL_449551	6095042	D	R	0.007	0.912771	0.0197864	DEL/PAV
D7_6095044_17	6095044	D17	<R>	0.007	0.912771	0.0197864	DEL/PAV
218426973_1	6095066	V	R	0.029	0.244671	0.18262	indel
218427055	6095148	T	G	0.324	0.381955	9.53791e-06	.
218427073	6095166	A	G	0.341	0.445118	3.05059e-07	.
218427231	6095324	A	C	0.344	0.458282	1.57431e-07	.
218427263_1	6095356	V	R	0.337	0.453315	1.98166e-07	indel
218427321	6095414	A	T	0.327	0.393726	4.60658e-06	.
DEL_449552	6095483	D	R	0.2	0.351621	4.40688e-05	DEL/PAV
218427391_16	6095484	V	R	0.186	0.20954	0.0156387	indel
D7_6095485_16	6095485	D16	<R>	0.2	0.351621	4.40688e-05	DEL/PAV
218427760	6095853	A	C	0.33	0.386753	6.91718e-06	.
218428180	6096273	A	T	0.352	0.443993	3.42501e-07	.
218428213	6096306	G	A	0.332	0.402135	4.46341e-06	.
218428220_1	6096313	V	R	0.327	0.39097	9.34855e-06	indel
218428266	6096359	C	T	0.344	0.449044	3.35948e-07	.
218428392	6096485	C	T	0.352	0.457779	1.82884e-07	.
218428404_1	6096497	V	R	0.32	0.40279	2.97413e-06	indel
218428416_A	6096509	V	R	0.274	0.323737	8.06748e-05	indel
218428419	6096512	T	C	0.328	0.408096	4.15152e-06	.
218428428	6096521	G	C	0.343	0.465448	1.37943e-07	.
218428430	6096523	T	C	0.326	0.402059	4.6622e-06	.
218428454	6096547	C	T	0.349	0.465028	1.24052e-07	.
218428487	6096580	T	C	0.343	0.480522	6.37605e-08	.
218428519	6096612	T	A	0.345	0.463753	1.26872e-07	.
218428578	6096671	A	G	0.331	0.386063	1.00404e-05	.
218428586	6096679	A	G	0.33	0.391108	1.04679e-05	.
218428589	6096682	A	C	0.334	0.392682	6.35626e-06	.
218428615_ATA	6096708	V	R	0.277	0.349451	3.85366e-05	indel
218428716	6096809	T	A	0.335	0.412424	1.34635e-06	.
218428946_3	6097039	V	R	0.024	-0.148309	0.53272	indel
218429014_T	6097107	V	R	0.217	0.163808	0.0671072	indel
218429181	6097274	C	A	0.346	0.476185	8.05992e-08	.
218429200	6097293	G	C	0.341	0.434709	1.21184e-06	.
218429302_1	6097395	V	R	0.27	0.32714	7.55981e-05	indel
218429398	6097491	A	T	0.34	0.437595	7.48187e-07	.
218429411	6097504	G	A	0.343	0.449581	2.71048e-07	.
218429413	6097506	A	C	0.34	0.443599	4.40993e-07	.
218429503_GT	6097596	V	R	0.194	0.152428	0.0756701	indel
218429521	6097614	T	G	0.338	0.440551	6.73631e-07	.
218429580_T	6097673	V	R	0.186	0.247482	0.00389003	indel
218429587	6097680	T	A	0.337	0.443709	6.34948e-07	.
218429743_1	6097836	V	R	0.178	0.174354	0.0482016	indel
218429771_1	6097864	V	R	0.144	0.213585	0.0186814	indel
218429880	6097973	T	C	0.048	-0.161266	0.327749	.
218429919_1	6098012	V	R	0.292	0.33895	6.92227e-05	indel
218430061	6098154	G	A	0.353	0.440298	4.17724e-07	.
218430159	6098252	A	G	0.346	0.447962	4.27528e-07	.
218430184	6098277	A	G	0.35	0.450513	3.3332e-07	.
218430193	6098286	G	C	0.332	0.390064	8.32067e-06	.
218430236	6098329	A	G	0.347	0.444093	4.13116e-07	.
218430293	6098386	C	T	0.349	0.452381	3.06331e-07	.
218430759	6098852	G	A	0.347	0.41047	2.42827e-06	.
218430761	6098854	A	G	0.058	0.0833977	0.606346	.
DEL_449555	6098970	D	R	0.007	0.224329	0.586142	DEL/PAV
D7_6098972_33	6098972	D33	<R>	0.007	0.224329	0.586142	DEL/PAV
218430957	6099050	T	C	0.35	0.460859	1.15288e-07	.
218431133_4	6099226	V	R	0.322	0.380232	4.04963e-06	indel
218431165	6099258	A	G	0.351	0.436367	4.24358e-07	.
218431239_AG	6099332	V	R	0.321	0.341981	5.0528e-05	indel
218431501	6099594	A	G	0.326	0.35604	5.54186e-05	.
218431593	6099686	T	C	0.335	0.384177	9.00188e-06	.
218431632	6099725	T	A	0.335	0.38494	8.80222e-06	.
218431946_T	6100039	V	R	0.304	0.359455	2.73088e-05	indel
218432344	6100437	C	A	0.332	0.359066	3.90421e-05	.
218432422	6100515	A	T	0.349	0.435142	6.21622e-07	.
218432561	6100654	A	G	0.347	0.453731	1.77384e-07	.
218432814	6100907	G	T	0.352	0.445986	2.22628e-07	.
218432897	6100990	A	C	0.348	0.440532	3.46254e-07	.
218433564	6101657	A	T	0.352	0.449082	2.64653e-07	.
218434067_AA	6102160	V	R	0.245	0.197347	0.0203592	indel
218434068	6102161	A	T	0.282	0.453877	5.8189e-07	.
218434100	6102193	C	G	0.031	-0.0699511	0.740658	.
218434269	6102362	A	C	0.35	0.414342	2.17288e-06	.
218434358_1	6102451	V	R	0.297	0.325068	0.000125372	indel
218434358_A	6102451	V	R	0.019	0.282889	0.253356	indel
218434427	6102520	G	A	0.349	0.42645	7.53345e-07	.
218434499	6102592	A	G	0.298	0.286052	0.0014598	.
218434503	6102596	G	A	0.353	0.445323	3.07567e-07	.
218434514	6102607	G	A	0.356	0.453579	1.95496e-07	.
218434518	6102611	T	C	0.356	0.447001	2.8146e-07	.
218434545	6102638	T	C	0.304	0.317017	0.000475726	.
218434600	6102693	T	C	0.305	0.331779	0.000265277	.
218434604	6102697	A	G	0.027	0.403898	0.124189	.
218434642	6102735	C	T	0.299	0.317181	0.000356047	.
218434794_G	6102887	V	R	0.219	0.333116	0.000118034	indel
218434810	6102903	T	G	0.296	0.333265	0.000240727	.
218434829	6102922	G	A	0.348	0.455858	2.36752e-07	.
218435081_1	6103174	V	R	0.26	0.249327	0.00239808	indel
218435370	6103463	G	A	0.303	0.315683	0.000483567	.
218435593_ATTTTATAGA	6103686	V	R	0.137	0.156609	0.101426	indel
218435713	6103806	G	A	0.31	0.310454	0.000567324	.
218435806_A	6103899	V	R	0.059	0.258159	0.160663	indel
218435806_AA	6103899	V	R	0.2	0.34276	6.236e-05	indel
218436023	6104116	T	G	0.286	0.243897	0.00507221	.
218436135	6104228	G	A	0.336	0.442318	3.21765e-07	.
218436277	6104370	G	A	0.337	0.433289	5.15775e-07	.
218436330	6104423	G	A	0.337	0.41924	1.78643e-06	.
218436338	6104431	A	T	0.303	0.292643	0.00109818	.
218436489_AAGG	6104582	V	R	0.143	0.235685	0.0132181	indel
218436510_3	6104603	V	R	0.166	0.0724823	0.421962	indel
218436523	6104616	A	C	0.34	0.442441	5.68108e-07	.
218436574	6104667	T	C	0.298	0.274091	0.00180766	.
218436636_1	6104729	V	R	0.277	0.281518	0.0005261	indel
218436669	6104762	A	G	0.342	0.44089	4.6247e-07	.
218436692	6104785	A	G	0.291	0.27189	0.00223982	.
218436710	6104803	C	T	0.348	0.437516	3.19016e-07	.
218436742	6104835	G	A	0.33	0.357973	2.89859e-05	.
218436861	6104954	A	G	0.347	0.459892	1.3981e-07	.
218436927	6105020	T	C	0.339	0.461517	5.37957e-08	.
218436983	6105076	C	T	0.27	0.254903	0.00412277	.
218436995	6105088	A	G	0.255	0.243139	0.00728974	.
218437004	6105097	G	A	0.326	0.432842	1.11841e-06	.
218437087	6105180	T	C	0.336	0.447181	2.65184e-07	.
218437119	6105212	A	C	0.344	0.45585	1.531e-07	.
218437188	6105281	T	G	0.35	0.443968	3.86242e-07	.
218437211	6105304	T	C	0.349	0.446223	3.53721e-07	.
218437218_2	6105311	V	R	0.204	0.166046	0.0526881	indel
218437222	6105315	G	A	0.323	0.358032	4.26476e-05	.
218437240	6105333	A	T	0.285	0.418116	1.09935e-05	.
218437241	6105334	T	A	0.289	0.398693	2.35082e-05	.
218437365	6105458	T	C	0.31	0.310454	0.000567324	.
218437386	6105479	A	T	0.352	0.45404	2.28734e-07	.
218437387	6105480	A	C	0.353	0.459305	1.54045e-07	.
218437399	6105492	A	T	0.348	0.479762	5.14289e-08	.
218438041	6106134	C	T	0.336	0.403617	3.13284e-06	.
218438186	6106279	C	T	0.35	0.442177	4.51542e-07	.
218438314	6106407	G	A	0.352	0.435408	6.8696e-07	.
218438625_2	6106718	V	R	0.32	0.364308	1.82263e-05	indel
218438830	6106923	G	A	0.349	0.441997	4.25836e-07	.
218439255	6107348	G	A	0.349	0.448905	2.6005e-07	.
218439294	6107387	T	C	0.352	0.447725	2.85155e-07	.
218440180_A	6108273	V	R	0.3	0.31788	0.000292615	indel
218440561	6108654	T	A	0.349	0.443729	3.61814e-07	synonymous_variant
218441022	6109115	A	C	0.308	0.307946	0.000585112	intron_variant
218441027	6109120	T	C	0.351	0.450565	2.45878e-07	intron_variant
218441322	6109415	A	C	0.347	0.444823	4.60638e-07	intron_variant
218441350	6109443	T	C	0.35	0.470147	7.96475e-08	intron_variant
218441388_AA	6109481	V	R	0.312	0.29409	0.000361988	indel
218441769	6109862	T	A	0.288	0.384031	3.7801e-05	intron_variant
218441773	6109866	A	G	0.351	0.450565	2.45878e-07	intron_variant
218441775	6109868	T	A	0.341	0.396081	3.38431e-06	intron_variant
218441823	6109916	A	G	0.306	0.292496	0.00118635	intron_variant
218442197	6110290	C	A	0.347	0.464975	9.19164e-08	intron_variant
218442238	6110331	C	T	0.304	0.295526	0.00104953	intron_variant
218442313	6110406	A	T	0.345	0.405303	3.2418e-06	intron_variant
218442348	6110441	T	A	0.349	0.446454	3.63109e-07	intron_variant
218442884	6110977	C	G	0.353	0.456981	1.61528e-07	intron_variant
218442907	6111000	C	A	0.352	0.453125	2.01977e-07	intron_variant
218443090	6111183	T	C	0.31	0.301834	0.000806844	intron_variant
218443276	6111369	C	A	0.31	0.310454	0.000567324	intron_variant
218443777	6111870	C	T	0.311	0.314347	0.000486484	intron_variant
218444040	6112133	G	C	0.351	0.450565	2.45878e-07	intron_variant
218444383	6112476	C	T	0.35	0.449296	2.68338e-07	intron_variant
218444663_A	6112756	V	R	0.027	0.533211	0.00717393	indel
218444731	6112824	A	C	0.349	0.439565	4.44499e-07	intron_variant
218445079	6113172	T	A	0.351	0.450565	2.45878e-07	intron_variant
218445155	6113248	C	T	0.351	0.450565	2.45878e-07	intron_variant
218445304	6113397	G	A	0.346	0.44902	3.02195e-07	synonymous_variant
218445399	6113492	T	A	0.308	0.314052	0.000460363	intron_variant
218445475	6113568	G	A	0.31	0.310454	0.000567324	intron_variant
218445614	6113707	C	T	0.351	0.450565	2.45878e-07	intron_variant
218445940	6114033	C	A	0.349	0.464589	1.14489e-07	intron_variant
218445947	6114040	G	A	0.347	0.453558	2.50577e-07	intron_variant
218446693	6114786	T	A	0.308	0.314052	0.000460363	intron_variant
218446975	6115068	C	T	0.35	0.440904	4.13812e-07	intron_variant
218447018_2	6115111	R	V	0.193	0.0137299	0.852209	indel
218447391	6115484	G	A	0.319	0.35004	9.56152e-05	5_prime_UTR_variant
218447464_CGGGAT	6115557	V	R	0.057	-0.000443287	0.997381	indel
218447971	6116064	C	T	0.322	0.423325	8.96086e-07	.
218448060	6116153	G	A	0.329	0.382279	1.06827e-05	.
218448090	6116183	A	G	0.304	0.316438	0.000344415	.
218448102	6116195	G	A	0.315	0.354383	8.27118e-05	.
218448169	6116262	A	G	0.28	0.229451	0.0122737	.
218448271	6116364	C	A	0.274	0.228302	0.0134355	.
218448479_A	6116572	V	R	0.226	0.189701	0.0277843	indel
218448514	6116607	G	A	0.349	0.443714	4.21459e-07	.
218448529	6116622	A	T	0.309	0.295734	0.00107808	.
218448531	6116624	A	C	0.305	0.270416	0.0028574	.
218448577	6116670	A	T	0.348	0.442739	3.93618e-07	.
218448702	6116795	A	G	0.325	0.401753	4.13049e-06	.
218448729	6116822	A	G	0.328	0.376682	1.34941e-05	.
218448788	6116881	A	G	0.326	0.385972	6.51963e-06	.
218448828	6116921	T	C	0.307	0.322428	0.000290195	.
218448858	6116951	A	T	0.332	0.402483	3.32654e-06	.
218448874	6116967	A	G	0.352	0.443933	3.78447e-07	.
218448907	6117000	T	C	0.334	0.387392	7.84347e-06	.
218448983	6117076	A	G	0.308	0.299665	0.000925392	.
218448991	6117084	A	T	0.347	0.448737	3.0116e-07	.
218449011	6117104	T	C	0.332	0.377553	1.44602e-05	.
218449173	6117266	G	A	0.334	0.387392	7.84347e-06	.
218449475	6117568	C	T	0.332	0.385978	8.52869e-06	.
218449734	6117827	A	G	0.332	0.377974	1.2589e-05	3_prime_UTR_variant
218449827	6117920	C	T	0.351	0.450565	2.45878e-07	3_prime_UTR_variant
218449858	6117951	C	T	0.347	0.44696	3.82122e-07	3_prime_UTR_variant
218449902_T	6117995	V	R	0.294	0.24366	0.00350629	indel
218449964	6118057	C	G	0.351	0.450565	2.45878e-07	3_prime_UTR_variant
218450297	6118390	C	G	0.351	0.450565	2.45878e-07	missense
218451062	6119155	C	T	0.351	0.450565	2.45878e-07	synonymous_variant
218451352_AAG	6119445	V	R	0.324	0.41893	4.32264e-07	indel
218451754	6119847	C	G	0.334	0.387392	7.84347e-06	splice_region_variant
218451757	6119850	A	C	0.351	0.450565	2.45878e-07	intron_variant
218451959	6120052	C	A	0.352	0.458182	1.48779e-07	intron_variant
218452000	6120093	A	G	0.349	0.440049	4.42646e-07	intron_variant
218452765	6120858	C	T	0.334	0.422957	1.72424e-06	synonymous_variant
218453536	6121629	C	A	0.353	0.400806	3.16422e-06	missense
218453546	6121639	A	G	0.318	0.298597	0.00101193	missense
218453556_1	6121649	V	R	0.189	0.21006	0.0120299	indel
218453676	6121769	T	G	0.259	0.332869	0.000248056	5_prime_UTR_variant
218453810_1	6121903	V	R	0.148	0.130755	0.154	indel
218453854_5	6121947	V	R	0.193	0.188865	0.0272513	indel
218453882_T	6121975	V	R	0.032	0.422334	0.0284628	indel
218453882_TT	6121975	V	R	0.195	0.199039	0.0232155	indel
218453899	6121992	C	T	0.356	0.473091	6.83064e-08	.
218453911	6122004	C	A	0.347	0.460987	1.28613e-07	.
218453912	6122005	C	A	0.306	0.302856	0.000791634	.
218453914	6122007	G	A	0.308	0.29757	0.00103208	.
218453978_1	6122071	V	R	0.233	0.207127	0.016304	indel
218454032_AATTTTTTT	6122125	V	R	0.065	0.0178489	0.892995	indel
218454070	6122163	G	A	0.332	0.411691	2.84547e-06	.
DEL_449559	6122190	D	R	0.047	0.099254	0.48969	DEL/PAV
218454098_11	6122191	V	R	0.157	0.237729	0.00729064	indel
D7_6122192_11	6122192	D11	<R>	0.047	0.099254	0.48969	DEL/PAV
218454123	6122216	C	T	0.342	0.449997	4.43507e-07	.
218454140	6122233	C	T	0.345	0.472381	1.57177e-07	.
218454219_1	6122312	V	R	0.216	0.198339	0.0197854	indel
218454250	6122343	T	C	0.34	0.431064	8.76482e-07	.
218454263	6122356	C	T	0.345	0.44793	3.33419e-07	.
218454275	6122368	T	C	0.343	0.451132	3.64912e-07	.
218454310	6122403	A	G	0.3	0.34095	0.000134577	.
218454369	6122462	T	C	0.302	0.32895	0.000247079	.
218454406	6122499	G	T	0.334	0.451388	2.48941e-07	.
218454455	6122548	G	A	0.332	0.444343	3.22675e-07	.
218454506	6122599	A	C	0.335	0.463361	2.94954e-07	.
218454526	6122619	T	C	0.321	0.383748	1.36329e-05	.
218454540	6122633	G	A	0.335	0.450061	3.49916e-07	.
218454599	6122692	T	C	0.334	0.439256	1.09655e-06	.
218454603_A	6122696	V	R	0.308	-0.063469	0.385242	indel
218454604_C	6122697	V	R	0.195	0.17737	0.0424533	indel
218454606	6122699	C	A	0.309	0.368734	4.80147e-05	.
218454617	6122710	G	A	0.347	0.435727	6.60836e-07	.
218454622	6122715	G	A	0.345	0.45013	3.24892e-07	.
218454643	6122736	C	T	0.345	0.448386	2.76719e-07	.
218454684	6122777	C	G	0.345	0.468253	7.18099e-08	.
218454702_A	6122795	V	R	0.146	0.214243	0.0220848	indel
218454703	6122796	A	T	0.204	0.368384	4.42185e-05	.
218454703_A	6122796	V	R	0.108	0.0640836	0.621112	indel
218454745_1	6122838	V	R	0.245	0.362924	2.0659e-05	indel
218454828_4	6122921	V	R	0.28	0.339141	4.98e-05	indel
218454874_1	6122967	V	R	0.296	0.371686	1.03355e-05	indel
218454956	6123049	G	C	0.346	0.430055	5.57428e-07	.
218455147	6123240	A	C	0.314	0.316971	0.00039482	.
218455332	6123425	C	T	0.034	0.527987	0.0033092	.
218455375	6123468	T	C	0.342	0.39704	6.47092e-06	.
218455376	6123469	A	G	0.342	0.39704	6.47092e-06	.
218455378	6123471	A	G	0.34	0.401412	4.98196e-06	.
218455421	6123514	A	G	0.034	0.530055	0.00318348	.
218455429	6123522	C	T	0.034	0.523885	0.00355916	.
218455450	6123543	G	A	0.344	0.44664	3.02978e-07	.
218455452	6123545	G	C	0.344	0.44664	3.02978e-07	.
218455455	6123548	T	C	0.352	0.454515	1.87267e-07	.
218455468	6123561	G	A	0.35	0.447081	2.90391e-07	.
218455478	6123571	C	T	0.347	0.438107	6.0369e-07	.
218455486	6123579	C	A	0.344	0.444659	3.00421e-07	.
218455518	6123611	A	G	0.308	0.311488	0.000454064	.
218455527	6123620	C	A	0.345	0.436006	5.3088e-07	.
218455529	6123622	C	T	0.346	0.458396	1.40089e-07	.
218455534	6123627	G	A	0.349	0.447969	2.65514e-07	.
218455562	6123655	A	G	0.34	0.417739	1.5109e-06	.
218455579	6123672	A	G	0.236	0.23716	0.00910458	.
218455581	6123674	C	T	0.268	0.384325	8.77555e-06	.
218455617	6123710	G	T	0.269	0.349153	7.64686e-05	.
218455708	6123801	A	G	0.328	0.404517	5.44037e-06	.
218455727	6123820	T	C	0.313	0.425612	2.03137e-06	.
218455756	6123849	T	C	0.293	0.408032	8.86945e-06	.
218455788	6123881	A	G	0.31	0.393628	1.11362e-05	.
218455849	6123942	T	G	0.332	0.39295	1.17413e-05	.
218455867	6123960	A	G	0.36	0.427874	9.5904e-07	.
218455879	6123972	G	C	0.302	0.418118	9.56304e-06	.
218455987	6124080	G	A	0.347	0.44234	3.50689e-07	.
218456016	6124109	C	T	0.245	0.323332	0.000372032	.
218456024	6124117	T	C	0.189	0.260472	0.00836291	.
218456051	6124144	C	T	0.336	0.434213	1.2469e-06	.
218456099	6124192	A	G	0.034	0.531466	0.00309955	.
218456189	6124282	A	G	0.305	0.374491	3.46934e-05	.
218456206	6124299	T	C	0.305	0.346281	9.12418e-05	.
218456236	6124329	G	A	0.329	0.421465	1.26651e-06	.
218456271	6124364	T	A	0.352	0.453125	2.01977e-07	.
218456292	6124385	A	G	0.285	0.245278	0.0097787	.
218456320	6124413	C	T	0.28	0.400445	5.99329e-05	.
218456364	6124457	C	T	0.555	-0.34966	4.97879e-05	.
218456406	6124499	T	C	0.178	0.288691	0.00316081	.
218456497	6124590	T	G	0.317	0.4336	2.45106e-06	.
218456507	6124600	G	A	0.323	0.381957	1.7634e-05	.
218456620	6124713	T	C	0.258	-0.228521	0.0168839	.
218456625	6124718	T	G	0.314	0.418423	3.13576e-06	.
218456651	6124744	T	C	0.329	0.436547	1.19089e-06	.
218456673	6124766	C	T	0.324	0.425515	3.7958e-06	.
218456699	6124792	T	A	0.307	0.406514	1.16588e-05	.
218457000	6125093	A	G	0.275	0.457715	8.15349e-07	synonymous_variant
218457039_TCA	6125132	V	R	0.166	0.232972	0.0237453	indel
218457040	6125133	G	A	0.269	0.473309	4.63056e-07	missense
218457042	6125135	T	G	0.272	0.467632	4.5607e-07	missense
218457446	6125539	T	C	0.169	0.22817	0.0338601	intron_variant
218457583	6125676	A	G	0.171	0.243736	0.0178541	intron_variant
218457724	6125817	C	G	0.306	0.35895	5.54248e-05	intron_variant
218457726	6125819	A	G	0.267	0.247808	0.00632539	intron_variant
218457749	6125842	G	C	0.288	0.389837	2.39075e-05	intron_variant
218458327	6126420	T	G	0.251	0.490713	1.71426e-06	stop_gained
218458335	6126428	T	C	0.34	0.394734	9.9002e-06	synonymous_variant
218458362	6126455	G	A	0.246	0.290841	0.00150798	synonymous_variant
218458436	6126529	C	A	0.203	0.299535	0.00149479	missense
218458693	6126786	A	G	0.275	0.391989	1.15027e-05	intron_variant
218458794	6126887	G	A	0.249	0.354548	0.000153597	intron_variant
218458940	6127033	T	C	0.298	0.403253	1.35807e-05	intron_variant
218459310	6127403	A	G	0.297	0.337356	9.61382e-05	missense
218459410	6127503	T	C	0.272	0.283369	0.00171872	missense
218459422	6127515	C	T	0.283	0.400132	4.14053e-06	missense
218459432	6127525	G	A	0.281	0.419017	1.14032e-06	synonymous_variant
218459650	6127743	A	G	0.297	0.29371	0.00160032	missense
218459686	6127779	A	G	0.054	-0.151709	0.315211	missense
218459691	6127784	T	C	0.351	0.450565	2.45878e-07	missense
218459705	6127798	G	A	0.351	0.450565	2.45878e-07	synonymous_variant
218459730	6127823	A	G	0.347	0.447797	2.59913e-07	missense
218459744	6127837	T	C	0.037	0.517033	0.00235694	synonymous_variant
218459747	6127840	C	T	0.332	0.398809	5.93996e-06	synonymous_variant
218459753	6127846	A	G	0.306	0.387262	2.09725e-05	synonymous_variant
218459869	6127962	C	T	0.297	0.353568	6.17646e-05	.
218459870	6127963	A	G	0.214	0.291611	0.00311951	.
218460087	6128180	T	C	0.335	0.427398	1.63987e-06	.
218460154	6128247	T	C	0.22	0.340102	0.000299469	.
218460189	6128282	G	A	0.297	0.404137	8.40803e-06	missense
218460201	6128294	T	C	0.301	0.395651	8.9808e-06	stop_gained
218460268	6128361	C	T	0.325	0.398481	1.29852e-05	missense
218460286	6128379	C	T	0.69	-0.328455	0.000282414	missense
218460393_2	6128486	V	R	0.199	0.405905	0.000782065	indel
218460507	6128600	A	G	0.294	0.34606	0.000241453	missense
218460516	6128609	G	A	0.26	0.340302	0.00076957	missense
218460580	6128673	G	T	0.264	0.331306	0.000218002	missense
218460705	6128798	T	C	0.232	0.551562	1.2713e-06	stop_gained
218461006	6129099	T	C	0.259	0.5357	5.57464e-07	missense
218461057	6129150	G	A	0.232	0.348532	0.00159414	splice_region_variant
218461086	6129179	C	T	0.34	0.432701	1.4107e-06	intron_variant
218461358	6129451	A	G	0.227	0.347313	0.000609743	synonymous_variant
218461511	6129604	A	G	0.293	0.439834	7.09008e-06	.
218461604	6129697	G	A	0.344	0.425775	1.80823e-06	.
218461689	6129782	C	G	0.107	-0.185155	0.143039	.
218461707	6129800	A	G	0.309	0.395758	4.3627e-06	.
218461712	6129805	C	T	0.335	0.38911	6.32347e-06	.
218461721_A	6129814	V	R	0.194	0.2006	0.0346448	indel
218461733_G	6129826	V	R	0.026	0.535506	0.0143217	indel
218461795	6129888	T	C	0.358	0.413016	2.9537e-06	.
DEL_449561	6129896	D	R	0.034	-0.299644	0.117907	DEL/PAV
218461804_17	6129897	V	R	0.054	-0.136293	0.425346	indel
D7_6129898_17	6129898	D17	<R>	0.034	-0.299644	0.117907	DEL/PAV
218461837	6129930	T	C	0.037	0.517033	0.00235694	.
218461846	6129939	G	A	0.322	0.40214	4.65496e-06	.
218461850	6129943	C	G	0.326	0.408609	2.40568e-06	.
218461893	6129986	C	T	0.348	0.45356	1.83002e-07	.
218461894	6129987	A	G	0.346	0.453161	1.66331e-07	.
218461899	6129992	T	C	0.304	0.319585	0.00034164	.
218461962	6130055	A	G	0.346	0.462195	1.19347e-07	.
218462013	6130106	A	G	0.347	0.438971	4.33768e-07	.
218462034	6130127	C	A	0.345	0.460649	1.95584e-07	.
218462044	6130137	T	C	0.034	0.530055	0.00318348	.
218462050	6130143	A	T	0.308	0.314402	0.000528675	.
218462135	6130228	T	C	0.351	0.450565	2.45878e-07	.
218462160	6130253	G	A	0.303	0.324648	0.000270198	.
218462244	6130337	C	T	0.352	0.446888	3.21556e-07	.
218462257_T	6130350	V	R	0.303	0.244188	0.00434409	indel
218462519	6130612	G	C	0.311	0.315732	0.000428591	.
218462555_1	6130648	V	R	0.262	0.301235	0.000322544	indel
218462556_1	6130649	R	V	0.171	0.0304646	0.750009	indel
218462571	6130664	C	G	0.348	0.427783	1.24196e-06	.
218462671	6130764	T	C	0.346	0.479581	3.75579e-08	.
218462782	6130875	C	T	0.34	0.429658	5.51685e-07	.
218462794_1	6130887	V	R	0.221	0.282934	0.000888426	indel
218462841_TT	6130934	V	R	0.031	0.354152	0.0551003	indel
218462841_TTT	6130934	V	R	0.18	0.103736	0.258971	indel
218462867	6130960	G	C	0.31	0.372157	6.00747e-05	.
218462902_A	6130995	V	R	0.244	0.215983	0.0107974	indel
218463021	6131114	G	A	0.345	0.423024	9.84184e-07	.
218463023	6131116	T	A	0.337	0.422522	6.85614e-07	.
218463064	6131157	T	C	0.034	0.456193	0.0101308	.
218463087	6131180	A	C	0.034	0.458164	0.00978031	.
218463091	6131184	A	C	0.034	0.457562	0.00986723	.
218463119	6131212	C	G	0.322	0.407715	3.07296e-06	.
218463135	6131228	C	T	0.327	0.389247	7.50952e-06	.
218463146	6131239	C	T	0.329	0.405103	3.86703e-06	.
218463158	6131251	A	G	0.034	0.459875	0.00953487	.
218463163	6131256	A	G	0.034	0.463352	0.00899984	.
218463169_C	6131262	V	R	0.119	0.137518	0.168676	indel
218463203	6131296	T	C	0.315	0.329149	0.000279971	.
218463223	6131316	C	T	0.306	0.29498	0.000999256	.
218463224_2	6131317	V	R	0.031	0.493806	0.00706691	indel
218463235	6131328	T	C	0.032	0.490076	0.00727247	.
218463258	6131351	C	T	0.314	0.416395	5.20115e-06	.
218463316_A	6131409	V	R	0.192	0.261673	0.00234778	indel
218463319	6131412	A	C	0.317	0.359989	8.52678e-05	.
218463339	6131432	G	A	0.341	0.445941	3.50212e-07	.
218463374_2	6131467	V	R	0.242	0.10261	0.234953	indel
218463382	6131475	C	T	0.325	0.41472	7.79554e-06	.
218463394	6131487	C	T	0.327	0.437754	2.06647e-06	.
218463395	6131488	G	A	0.314	0.396389	2.00337e-05	.
218463400	6131493	G	A	0.327	0.432654	2.64911e-06	.
218463440	6131533	T	C	0.274	0.342317	0.000217051	.
218463447	6131540	T	C	0.252	0.309556	0.000801765	.
218463478	6131571	C	T	0.23	0.311617	0.00083118	.
218463503	6131596	A	G	0.247	0.386269	1.64313e-05	.
218463522	6131615	A	G	0.273	0.32655	0.000403714	.
218463549	6131642	A	G	0.291	0.344236	0.000250744	.
218463627	6131720	A	G	0.334	0.282164	0.00168678	.
218463653	6131746	C	T	0.362	0.41567	2.82776e-06	.
218463682	6131775	A	T	0.313	0.319798	0.000438939	.
218463690	6131783	G	T	0.351	0.422408	1.38814e-06	.
218463720	6131813	G	C	0.312	0.360717	8.24325e-05	.
218463755_1	6131848	V	R	0.227	0.305595	0.000188858	indel
218463808	6131901	G	A	0.319	0.427056	1.42602e-06	.
218463825	6131918	G	A	0.296	0.436317	2.18412e-06	.
218463844	6131937	G	A	0.301	0.413128	7.33474e-06	.
218463881	6131974	T	G	0.327	0.492357	4.25721e-08	.
218463886	6131979	A	C	0.331	0.488223	4.52351e-08	.
218463911	6132004	G	A	0.034	0.456533	0.0100455	.
218463921	6132014	C	A	0.344	0.473071	7.68581e-08	.
218463930	6132023	A	G	0.034	0.45544	0.010236	.
218463934	6132027	C	T	0.314	0.36853	5.9031e-05	.
218463977_TATGT	6132070	V	R	0.027	0.498171	0.0109764	indel
218463981_TTTTATAT	6132074	V	R	0.146	0.222905	0.0187548	indel
218463996	6132089	C	T	0.316	0.366557	5.49848e-05	.
218464030_18	6132123	V	R	0.085	0.127826	0.248333	indel
218464049	6132142	T	A	0.28	0.318374	0.000697174	.
218464049_TT	6132142	V	R	0.032	0.500303	0.00636778	indel
218464071	6132164	G	C	0.034	0.458912	0.00966793	.
218464080	6132173	C	G	0.034	0.459188	0.00963425	.
218464096_C	6132189	V	R	0.031	0.490133	0.00747545	indel
218464111	6132204	A	T	0.315	0.352295	8.37676e-05	.
218464120	6132213	G	T	0.35	0.442192	3.26498e-07	.
218464129	6132222	C	G	0.034	0.456761	0.0100393	.
218464156	6132249	G	A	0.306	0.352111	0.000105778	.
218464175	6132268	A	C	0.034	0.453997	0.0104618	.
218464201	6132294	T	C	0.305	0.33457	0.000238612	.
218464214	6132307	C	T	0.349	0.462694	9.74416e-08	.
218464231	6132324	A	G	0.033	0.473747	0.0106768	.
218464233_5	6132326	V	R	0.244	0.312948	0.000221711	indel
218464233_6	6132326	V	R	0.031	0.486447	0.00794006	indel
218464337	6132430	G	A	0.345	0.464247	1.21443e-07	.
218464346	6132439	G	A	0.343	0.47096	1.00227e-07	.
218464389	6132482	T	C	0.304	0.362291	8.62975e-05	.
218464394	6132487	C	A	0.034	0.456193	0.0101308	.
218464401	6132494	T	C	0.307	0.354682	0.000105886	.
218464422	6132515	A	G	0.308	0.322645	0.000508211	.
218464459	6132552	T	C	0.307	0.317537	0.000682224	.
218464470	6132563	C	T	0.345	0.433347	1.27294e-06	.
218464515	6132608	T	A	0.345	0.423301	1.2566e-06	.
218464517	6132610	T	C	0.309	0.340054	0.00018262	.
218464522	6132615	T	C	0.032	0.498766	0.00657858	.
218464523	6132616	A	G	0.308	0.322313	0.000385178	.
218464525	6132618	G	A	0.349	0.454074	1.99507e-07	.
218464561	6132654	A	T	0.349	0.445126	3.8011e-07	.
218464573	6132666	A	T	0.034	0.467466	0.00842315	.
218464599	6132692	C	T	0.034	0.459188	0.00963425	.
218464627	6132720	T	C	0.034	0.459188	0.00963425	.
218464639_1	6132732	V	R	0.058	0.300698	0.0306801	indel
218464703	6132796	G	T	0.356	0.426131	1.23055e-06	.
218464710	6132803	G	A	0.034	0.459188	0.00963425	.
218464779	6132872	A	G	0.315	0.35731	7.4821e-05	.
218464799	6132892	C	T	0.317	0.349855	0.000103429	.
218464877	6132970	G	A	0.366	0.430516	1.01216e-06	missense
218464960_1	6133053	V	R	0.027	0.216741	0.392101	indel
218464983_1	6133076	V	R	0.034	0.459188	0.00963425	indel
218465234	6133327	A	G	0.114	-0.181914	0.206359	missense
218465258	6133351	G	A	0.315	0.339079	0.000178844	missense
218465301	6133394	A	G	0.774	-0.370198	0.000193205	.
218465381	6133474	T	C	0.034	0.459188	0.00963425	.
218465393	6133486	C	A	0.034	0.459188	0.00963425	.
218465415	6133508	C	T	0.034	0.459188	0.00963425	.
218465423	6133516	C	T	0.35	0.448355	3.33022e-07	.
218465452	6133545	A	G	0.312	0.356682	7.40661e-05	.
218465465	6133558	G	A	0.35	0.431285	6.19342e-07	.
218465503	6133596	T	C	0.034	0.459188	0.00963425	.
218465504	6133597	T	C	0.034	0.459188	0.00963425	.
218465522	6133615	C	A	0.344	0.457074	2.20048e-07	.
218465536_1	6133629	V	R	0.034	0.462981	0.0090077	indel
218465536_A	6133629	V	R	0.212	0.298786	0.00037389	indel
218465548	6133641	G	C	0.313	0.363779	6.77739e-05	.
218465556	6133649	T	C	0.034	0.45844	0.00975154	.
218465565	6133658	T	C	0.311	0.366287	6.09811e-05	.
218465584	6133677	T	C	0.349	0.471898	7.52267e-08	.
218465602	6133695	C	T	0.034	0.456193	0.0101308	.
218465617_1	6133710	V	R	0.313	0.377807	9.11727e-06	indel
218465657	6133750	T	C	0.311	0.362641	7.28343e-05	.
218465694	6133787	A	G	0.034	0.461195	0.00931389	.
DEL_449566	6133802	D	R	0.125	0.0133054	0.889598	DEL/PAV
D7_6133804_22	6133804	D22	<R>	0.125	0.0133054	0.889598	DEL/PAV
DEL_449567	6133824	D	R	0.003	0.400227	0.456911	DEL/PAV
218465733_1	6133826	V	R	0.034	0.383229	0.0864698	indel
D7_6133826_17	6133826	D17	<R>	0.129	0.0253326	0.789512	DEL/PAV
D7_6133843_17	6133843	D17	<R>	0.125	0.0133054	0.889598	DEL/PAV
D7_6133860_1	6133860	D1	<R>	0.031	0.0555115	0.745233	DEL/PAV
218465834	6133927	T	C	0.307	0.314509	0.00046197	.
218465851	6133944	T	C	0.308	0.313436	0.000481495	.
218465857	6133950	G	T	0.034	0.456229	0.0101351	.
218466032	6134125	C	T	0.339	0.377252	1.53496e-05	synonymous_variant
218466533	6134626	A	G	0.311	0.339956	0.000188875	synonymous_variant
218466637	6134730	A	G	0.317	0.349855	0.000103429	synonymous_variant
218466661	6134754	G	C	0.034	0.459188	0.00963425	synonymous_variant
218466751	6134844	G	C	0.034	0.459188	0.00963425	intron_variant
218466759	6134852	G	T	0.034	0.459188	0.00963425	intron_variant
218466764_3	6134857	V	R	0.031	0.438193	0.0183475	indel
218466791	6134884	G	C	0.034	0.45844	0.00975154	intron_variant
218466794	6134887	C	T	0.033	0.507275	0.00526349	intron_variant
218466800_4	6134893	V	R	0.027	0.535642	0.00530871	indel
218466816_8	6134909	V	R	0.027	0.540692	0.00488546	indel
218467071_T	6135164	V	R	0.236	0.384671	7.62845e-06	indel
DEL_449568	6135262	D	R	0.058	0.122368	0.355466	DEL/PAV
218467170_16	6135263	V	R	0.134	0.184172	0.0596129	indel
D7_6135264_16	6135264	D16	<R>	0.058	0.122368	0.355466	DEL/PAV
218467278_T	6135371	V	R	0.229	0.413532	2.59327e-06	indel
218467400	6135493	C	T	0.034	0.462077	0.00921635	synonymous_variant
218467454	6135547	C	A	0.034	0.461052	0.00937123	synonymous_variant
218467469	6135562	T	C	0.034	0.459211	0.00966259	synonymous_variant
218467482	6135575	C	G	0.034	0.462396	0.0091345	missense
218467505	6135598	T	C	0.034	0.46104	0.00935124	synonymous_variant
218467735	6135828	C	G	0.323	0.392076	2.36502e-05	intron_variant
218467750	6135843	A	T	0.326	0.405183	1.18499e-05	intron_variant
218467761	6135854	A	G	0.326	0.405183	1.18499e-05	intron_variant
218467791	6135884	T	C	0.262	-0.169521	0.0772828	intron_variant
218467828	6135921	A	G	0.323	0.389713	2.6107e-05	intron_variant
218467829	6135922	A	G	0.326	0.396712	1.64489e-05	intron_variant
218467875_1	6135968	V	R	0.357	-0.0772691	0.326016	indel
218467875_TT	6135968	V	R	0.261	0.398821	5.6521e-06	indel
218467910	6136003	G	A	0.326	0.408594	7.39601e-06	intron_variant
218467922	6136015	A	T	0.326	0.408594	7.39601e-06	intron_variant
218467926	6136019	C	T	0.326	0.408594	7.39601e-06	intron_variant
218468104	6136197	G	A	0.328	0.407095	9.14117e-06	intron_variant
218468143_T	6136236	V	R	0.272	0.300674	0.000303887	indel
218468151_1	6136244	V	R	0.021	0.563635	0.010019	indel
218468160	6136253	T	G	0.034	0.458643	0.00971672	intron_variant
DEL_449569	6136270	D	R	0.007	0.2586	0.432864	DEL/PAV
218468178	6136271	C	T	0.034	0.462529	0.00912829	intron_variant
218468178_11	6136271	V	R	0.247	0.19492	0.0237816	indel
D7_6136272_11	6136272	D11	<R>	0.007	0.2586	0.432864	DEL/PAV
218468205	6136298	T	C	0.034	0.459188	0.00963425	synonymous_variant
218468292	6136385	T	G	0.034	0.457297	0.00993877	synonymous_variant
218468415	6136508	A	G	0.034	0.462529	0.00912829	3_prime_UTR_variant
218468463_2	6136556	V	R	0.031	0.421685	0.0255937	indel
218468469	6136562	T	G	0.034	0.461182	0.0093208	3_prime_UTR_variant
218468474	6136567	T	C	0.351	0.450565	2.45878e-07	3_prime_UTR_variant
218468483	6136576	A	T	0.034	0.459188	0.00963425	3_prime_UTR_variant
218468517_TA	6136610	V	R	0.031	0.466517	0.0133352	indel
218468528	6136621	T	A	0.351	0.450565	2.45878e-07	3_prime_UTR_variant
218468575	6136668	C	G	0.034	0.457297	0.00993877	3_prime_UTR_variant
218468583	6136676	C	T	0.314	0.383443	2.36018e-05	3_prime_UTR_variant
218468665	6136758	A	C	0.034	0.459188	0.00963425	3_prime_UTR_variant
218468799_T	6136892	V	R	0.296	0.357776	6.71599e-05	indel
218468817_G	6136910	V	R	0.02	0.521562	0.0182593	indel
218468964	6137057	C	G	0.034	0.460796	0.0093752	3_prime_UTR_variant
218469027	6137120	G	C	0.034	0.458591	0.00971922	3_prime_UTR_variant
218469101_CA	6137194	V	R	0.305	0.317372	0.000288089	indel
218469101_CGCA	6137194	V	R	0.034	0.459188	0.00963425	indel
DEL_449570	6137308	D	R	0.193	0.146277	0.107788	DEL/PAV
D7_6137310_32	6137310	D32	<R>	0.193	0.146277	0.107788	DEL/PAV
218469271_T	6137364	V	R	0.031	0.553258	0.00246777	indel
218469392_CT	6137485	V	R	0.032	0.443274	0.0178644	indel
218469494	6137587	T	C	0.034	0.459188	0.00963425	synonymous_variant
218469512	6137605	C	A	0.034	0.459188	0.00963425	synonymous_variant
218469635	6137728	A	G	0.034	0.459019	0.00964986	synonymous_variant
218469698	6137791	G	C	0.034	0.459188	0.00963425	splice_region_variant
218469700	6137793	T	C	0.034	0.459188	0.00963425	intron_variant
218469723	6137816	T	A	0.034	0.459188	0.00963425	intron_variant
218469733	6137826	A	C	0.034	0.459188	0.00963425	intron_variant
218469735_A	6137828	V	R	0.034	0.462197	0.00917789	indel
218469744	6137837	A	G	0.034	0.457497	0.0098945	intron_variant
218469758	6137851	C	A	0.034	0.459188	0.00963425	intron_variant
218469784	6137877	A	C	0.034	0.458265	0.00977377	intron_variant
218469822	6137915	A	G	0.034	0.458265	0.00977377	intron_variant
218469832_A	6137925	V	R	0.034	0.459188	0.00963425	indel
218469870	6137963	G	A	0.034	0.459188	0.00963425	intron_variant
218469950	6138043	G	T	0.034	0.459188	0.00963425	intron_variant
218469957	6138050	G	T	0.032	0.446911	0.0169391	intron_variant
218469980	6138073	T	G	0.034	0.459188	0.00963425	intron_variant
218469999	6138092	A	G	0.034	0.459019	0.00964986	intron_variant
218470003	6138096	T	C	0.034	0.459019	0.00964986	intron_variant
218470017	6138110	G	A	0.034	0.459019	0.00964986	intron_variant
218470029	6138122	G	A	0.034	0.459019	0.00964986	intron_variant
218470117_GAGTACTAGAA	6138210	V	R	0.024	0.47261	0.0241113	indel
218470128	6138221	G	A	0.034	0.459188	0.00963425	intron_variant
218470146	6138239	A	T	0.034	0.458265	0.00977377	intron_variant
218470151	6138244	C	T	0.034	0.458265	0.00977377	intron_variant
218470209	6138302	C	T	0.034	0.459188	0.00963425	intron_variant
218470210	6138303	A	G	0.034	0.459188	0.00963425	intron_variant
218470240	6138333	C	G	0.034	0.459188	0.00963425	intron_variant
218470250_4	6138343	V	R	0.031	0.421685	0.0255937	indel
218470269	6138362	T	G	0.317	0.349855	0.000103429	intron_variant
218470281_GTA	6138374	V	R	0.032	0.496889	0.00678158	indel
218470291	6138384	G	C	0.314	0.343677	0.000152237	intron_variant
218470309_A	6138402	V	R	0.268	0.278623	0.00238224	indel
218470356	6138449	C	G	0.034	0.456277	0.0101036	intron_variant
218470363	6138456	C	T	0.034	0.459188	0.00963425	intron_variant
218470429	6138522	T	C	0.034	0.459188	0.00963425	intron_variant
218470441	6138534	G	T	0.034	0.459188	0.00963425	intron_variant
218470461	6138554	G	A	0.034	0.462536	0.00913437	intron_variant
218470479	6138572	T	A	0.034	0.460415	0.00946869	intron_variant
218470504	6138597	G	A	0.034	0.461052	0.00937123	intron_variant
218470575	6138668	C	A	0.034	0.459188	0.00963425	intron_variant
218470624	6138717	G	A	0.034	0.459188	0.00963425	intron_variant
DEL_449571	6138723	D	R	0.02	0.626332	0.00291127	DEL/PAV
D7_6138725_23	6138725	D23	<R>	0.02	0.626332	0.00291127	DEL/PAV
218470661	6138754	A	T	0.034	0.461815	0.00923286	intron_variant
218470702	6138795	G	A	0.034	0.459188	0.00963425	synonymous_variant
218470783	6138876	G	A	0.034	0.458436	0.00977411	splice_region_variant
218470809	6138902	A	G	0.034	0.462317	0.00914936	intron_variant
218470813	6138906	C	G	0.034	0.459188	0.00963425	intron_variant
218470831	6138924	C	T	0.312	0.350082	9.50561e-05	intron_variant
218470833	6138926	T	C	0.034	0.458436	0.00977411	intron_variant
218470841	6138934	G	T	0.034	0.458436	0.00977411	intron_variant
218470886	6138979	A	G	0.034	0.450931	0.0110235	intron_variant
218470923_TCCTGAC	6139016	V	R	0.034	0.458931	0.00966852	indel
DEL_449573	6139148	D	R	0.017	0.758483	0.00137149	DEL/PAV
218471056_15	6139149	V	R	0.024	0.60192	0.0029644	indel
D7_6139150_15	6139150	D15	<R>	0.017	0.758483	0.00137149	DEL/PAV
218471084	6139177	A	G	0.034	0.45748	0.00989979	intron_variant
218471123	6139216	T	C	0.034	0.45748	0.00989979	intron_variant
218471160	6139253	T	G	0.351	0.450565	2.45878e-07	intron_variant
218471183	6139276	A	G	0.034	0.459188	0.00963425	intron_variant
218471216	6139309	C	A	0.034	0.459188	0.00963425	intron_variant
218471231	6139324	T	A	0.034	0.459188	0.00963425	synonymous_variant
218471369	6139462	T	C	0.034	0.457329	0.00992989	intron_variant
218471434	6139527	C	G	0.034	0.45748	0.00989979	intron_variant
218471457	6139550	C	T	0.034	0.45748	0.00989979	intron_variant
218471459_ATAAGT	6139552	V	R	0.031	0.438193	0.0183475	indel
218471588	6139681	G	A	0.034	0.459188	0.00963425	intron_variant
218471669	6139762	T	A	0.034	0.455647	0.0102113	intron_variant
218471699	6139792	G	T	0.034	0.455647	0.0102113	intron_variant
218471708	6139801	A	G	0.315	0.337829	0.000178289	intron_variant
218471795	6139888	G	A	0.032	0.497483	0.00671857	intron_variant
218471841	6139934	G	C	0.034	0.457794	0.00985356	intron_variant
218471857	6139950	C	T	0.034	0.459188	0.00963425	intron_variant
218471859_2	6139952	V	R	0.031	0.421685	0.0255937	indel
218471866	6139959	A	T	0.034	0.457573	0.00990269	intron_variant
218471893	6139986	A	C	0.034	0.459188	0.00963425	intron_variant
218471906_CTA	6139999	V	R	0.034	0.453603	0.0105606	indel
218471911_1	6140004	V	R	0.034	0.459188	0.00963425	indel
218471948	6140041	C	T	0.034	0.459188	0.00963425	intron_variant
218471997	6140090	C	T	0.317	0.349855	0.000103429	intron_variant
218472015	6140108	G	A	0.034	0.455647	0.0102113	intron_variant
218472049	6140142	A	C	0.034	0.451669	0.0108912	intron_variant
218472074_AA	6140167	V	R	0.166	0.18953	0.0376497	indel
218472094	6140187	T	C	0.311	0.338037	0.000159924	intron_variant
218472096	6140189	A	C	0.034	0.459188	0.00963425	intron_variant
218472099_1	6140192	V	R	0.031	0.490497	0.00743486	indel
218472142	6140235	T	A	0.032	0.513588	0.00471607	intron_variant
218472170	6140263	G	A	0.347	0.475595	4.18847e-08	intron_variant
218472254_C	6140347	V	R	0.031	0.436329	0.0188829	indel
218472310_A	6140403	V	R	0.034	0.459188	0.00963425	indel
218472368	6140461	C	T	0.034	0.456725	0.0100936	intron_variant
218472383_AT	6140476	V	R	0.034	0.459188	0.00963425	indel
218472395	6140488	C	T	0.034	0.457192	0.00992643	intron_variant
218472427_5	6140520	V	R	0.034	0.459188	0.00963425	indel
218472473_2	6140566	V	R	0.031	0.466301	0.0105864	indel
218472479	6140572	C	T	0.034	0.459188	0.00963425	intron_variant
218472530	6140623	T	C	0.034	0.458265	0.00977377	intron_variant
218472618_3	6140711	V	R	0.031	0.551867	0.00252839	indel
218472752	6140845	T	C	0.349	0.456321	1.48163e-07	5_prime_UTR_variant
218472774	6140867	C	T	0.034	0.455158	0.0102857	5_prime_UTR_variant
218472864	6140957	A	G	0.034	0.459188	0.00963425	5_prime_UTR_variant
218472870	6140963	T	A	0.034	0.459188	0.00963425	5_prime_UTR_variant
218472871	6140964	T	G	0.316	0.333611	0.000200432	5_prime_UTR_variant
218472871_GA	6140964	V	R	0.024	0.345835	0.11253	indel
218472878_1	6140971	V	R	0.02	0.486752	0.0331541	indel
218472882	6140975	T	G	0.034	0.459188	0.00963425	5_prime_UTR_variant
218472888	6140981	A	C	0.034	0.459188	0.00963425	5_prime_UTR_variant
218472942_TC	6141035	V	R	0.031	0.424631	0.0245659	indel
218472975	6141068	G	A	0.034	0.459188	0.00963425	5_prime_UTR_variant
DEL_449574	6141068	D	R	0.075	0.154013	0.196394	DEL/PAV
D7_6141070_12	6141070	D12	<R>	0.075	0.154013	0.196394	DEL/PAV
218472981_12	6141074	V	R	0.29	0.326136	0.000223124	indel
218472992_1	6141085	V	R	0.05	0.540248	0.00265766	indel
218472995	6141088	C	T	0.349	0.446714	2.97048e-07	5_prime_UTR_variant
218473030_2	6141123	V	R	0.303	0.308823	0.000502514	indel
218473059	6141152	G	C	0.034	0.452988	0.010662	5_prime_UTR_variant
218473106	6141199	G	C	0.034	0.459112	0.00963623	.
218473126	6141219	A	C	0.034	0.459188	0.00963425	.
218473127_1	6141220	V	R	0.034	0.459188	0.00963425	indel
218473134	6141227	C	T	0.034	0.459188	0.00963425	.
218473166	6141259	A	T	0.034	0.459188	0.00963425	.
218473167	6141260	T	G	0.034	0.459188	0.00963425	.
218473168	6141261	T	C	0.034	0.459188	0.00963425	.
218473179	6141272	G	C	0.034	0.459188	0.00963425	.
218473234	6141327	T	C	0.034	0.460747	0.00939787	.
218473236	6141329	T	G	0.034	0.459188	0.00963425	.
218473243	6141336	A	G	0.034	0.457273	0.00993194	.
218473244	6141337	T	G	0.034	0.461617	0.00925538	.
218473307	6141400	G	A	0.034	0.458615	0.00974677	.
218473319	6141412	T	C	0.312	0.352867	8.4965e-05	.
218473344	6141437	G	A	0.034	0.45819	0.00978993	.
DEL_449576	6141446	D	R	0.003	-0.265607	0.510527	DEL/PAV
D7_6141448_21	6141448	D21	<R>	0.003	-0.265607	0.510527	DEL/PAV
218473358	6141451	A	G	0.034	0.453123	0.0106268	.
218473366_10	6141459	V	R	0.034	0.459793	0.00952727	indel
D7_6141469_22	6141469	D22	<R>	0.003	-0.265607	0.510527	DEL/PAV
218473389	6141482	T	C	0.344	0.435624	4.4187e-07	.
218473396	6141489	A	G	0.034	0.455796	0.0101695	.
D7_6141491_2	6141491	D2	<R>	0.003	-0.265607	0.510527	DEL/PAV
D7_6141493_4	6141493	D4	<R>	0.007	0.112405	0.726135	DEL/PAV
D7_6141497_2	6141497	D2	<R>	0.007	0.112405	0.726135	DEL/PAV
D7_6141499_1	6141499	D1	<R>	0.007	0.112405	0.726135	DEL/PAV
D7_6141500_1	6141500	D1	<R>	0.003	0.742153	0.155269	DEL/PAV
D7_6141501_1	6141501	D1	<R>	0.003	0.742153	0.155269	DEL/PAV
D7_6141502_3	6141502	D3	<R>	0.003	0.742153	0.155269	DEL/PAV
218473411	6141504	T	C	0.311	0.358594	7.94431e-05	.
D7_6141505_7	6141505	D7	<R>	0.003	0.742153	0.155269	DEL/PAV
D7_6141512_2	6141512	D2	<R>	0.003	0.742153	0.155269	DEL/PAV
D7_6141514_1	6141514	D1	<R>	0.003	0.742153	0.155269	DEL/PAV
D7_6141515_1	6141515	D1	<R>	0.003	0.742153	0.155269	DEL/PAV
D7_6141516_6	6141516	D6	<R>	0.003	0.742153	0.155269	DEL/PAV
218473429	6141522	C	A	0.034	0.455234	0.0102758	.
D7_6141522_17	6141522	D17	<R>	0.003	0.742153	0.155269	DEL/PAV
218473432	6141525	G	T	0.034	0.456427	0.0100684	.
218473444	6141537	C	T	0.034	0.455234	0.0102758	.
D7_6141539_1	6141539	D1	<R>	0.003	0.742153	0.155269	DEL/PAV
D7_6141540_1	6141540	D1	<R>	0.003	0.742153	0.155269	DEL/PAV
D7_6141541_1	6141541	D1	<R>	0.003	0.742153	0.155269	DEL/PAV
D7_6141542_4	6141542	D4	<R>	0.003	0.742153	0.155269	DEL/PAV
D7_6141546_3	6141546	D3	<R>	0.003	0.742153	0.155269	DEL/PAV
218473455	6141548	C	T	0.034	0.455234	0.0102758	.
D7_6141549_1	6141549	D1	<R>	0.003	0.742153	0.155269	DEL/PAV
218473457	6141550	G	T	0.034	0.455234	0.0102758	.
D7_6141550_1	6141550	D1	<R>	0.003	0.742153	0.155269	DEL/PAV
D7_6141551_4	6141551	D4	<R>	0.007	0.403595	0.294845	DEL/PAV
218473461	6141554	T	G	0.314	0.343677	0.000152237	.
D7_6141555_2	6141555	D2	<R>	0.007	0.403595	0.294845	DEL/PAV
D7_6141557_1	6141557	D1	<R>	0.007	0.403595	0.294845	DEL/PAV
D7_6141558_1	6141558	D1	<R>	0.007	0.403595	0.294845	DEL/PAV
D7_6141559_1	6141559	D1	<R>	0.007	0.403595	0.294845	DEL/PAV
D7_6141560_1	6141560	D1	<R>	0.007	0.403595	0.294845	DEL/PAV
D7_6141561_1	6141561	D1	<R>	0.01	0.240309	0.442315	DEL/PAV
D7_6141562_1	6141562	D1	<R>	0.01	0.240309	0.442315	DEL/PAV
D7_6141563_1	6141563	D1	<R>	0.024	0.560284	0.00658708	DEL/PAV
D7_6141564_1	6141564	D1	<R>	0.024	0.560284	0.00658708	DEL/PAV
218473472	6141565	T	C	0.32	0.373951	5.00735e-05	.
D7_6141565_4	6141565	D4	<R>	0.024	0.560284	0.00658708	DEL/PAV
D7_6141569_1	6141569	D1	<R>	0.024	0.560284	0.00658708	DEL/PAV
D7_6141570_4	6141570	D4	<R>	0.024	0.560284	0.00658708	DEL/PAV
DEL_449577	6141573	D	R	0.034	0.459188	0.00963425	DEL/PAV
D7_6141574_1	6141574	D1	<R>	0.024	0.560284	0.00658708	DEL/PAV
D7_6141575_1	6141575	D1	<R>	0.024	0.560284	0.00658708	DEL/PAV
D7_6141576_1	6141576	D1	<R>	0.024	0.560284	0.00658708	DEL/PAV
D7_6141577_1	6141577	D1	<R>	0.024	0.560284	0.00658708	DEL/PAV
D7_6141578_1	6141578	D1	<R>	0.024	0.560284	0.00658708	DEL/PAV
D7_6141579_1	6141579	D1	<R>	0.024	0.560284	0.00658708	DEL/PAV
D7_6141580_1	6141580	D1	<R>	0.024	0.560284	0.00658708	DEL/PAV
D7_6141581_1	6141581	D1	<R>	0.024	0.560284	0.00658708	DEL/PAV
D7_6141582_1	6141582	D1	<R>	0.024	0.560284	0.00658708	DEL/PAV
D7_6141583_1	6141583	D1	<R>	0.024	0.560284	0.00658708	DEL/PAV
D7_6141584_1	6141584	D1	<R>	0.034	0.459188	0.00963425	DEL/PAV
D7_6141585_993	6141585	D993	<R>	0.034	0.459188	0.00963425	DEL/PAV
218473504	6141597	T	G	0.034	0.460519	0.00941741	.
218473512	6141605	C	T	0.315	0.351821	0.000111177	.
218473514	6141607	C	G	0.034	0.459188	0.00963425	.
218473523	6141616	T	A	0.034	0.459188	0.00963425	.
218473628	6141721	A	G	0.309	0.370181	8.19442e-05	.
[truncated: 7,792 more rows]

## Sheet: selected-120
Variant_ID	Position	Allelel1	Allele2_Ref	AF	beta	P_value	Variant_Effect	start	stop	locus	strand	annotation	logP
218422900	6090993	G	C	0.34	0.452371	1.78779e-07	missense	6089992	6091035	LOC_Os07g11050	+	IPP transferase, putative, expressed	6.74768
218450297	6118390	C	G	0.351	0.450565	2.45878e-07	missense	6117818	6121772	LOC_Os07g11070	-	DUF630/DUF632 domains containing protein, putative, expressed	6.60928
218451352_AAG	6119445	V	R	0.324	0.41893	4.32264e-07	indel	6117818	6121772	LOC_Os07g11070	-	DUF630/DUF632 domains containing protein, putative, expressed	6.36425
218421999	6090092	T	C	0.336	0.432271	6.56601e-07	missense	6089992	6091035	LOC_Os07g11050	+	IPP transferase, putative, expressed	6.1827
218422676	6090769	C	T	0.337	0.437761	7.05607e-07	missense	6089992	6091035	LOC_Os07g11050	+	IPP transferase, putative, expressed	6.15144
218422002	6090095	C	T	0.337	0.424705	9.1735e-07	missense	6089992	6091035	LOC_Os07g11050	+	IPP transferase, putative, expressed	6.03746
218464877	6132970	G	A	0.366	0.430516	1.01216e-06	missense	6132917	6133364	LOC_Os07g11100	-	hypothetical protein	5.99475
218467278_T	6135371	V	R	0.229	0.413532	2.59327e-06	indel	6134015	6136780	LOC_Os07g11110	+	NAD dependent epimerase/dehydratase family protein, putative, expressed	5.58615
218764938	6433031	G	A	0.464	0.408072	2.65463e-06	missense	6432376	6433170	LOC_Os07g11650	-	LTPL164 - Protease inhibitor/seed storage/LTP family protein precursor, expressed	5.576
218453536	6121629	C	A	0.353	0.400806	3.16422e-06	missense	6117818	6121772	LOC_Os07g11070	-	DUF630/DUF632 domains containing protein, putative, expressed	5.49973
DEL_449984	6373949	D	R	0.468	0.399557	3.30195e-06	large_del	6372667	6374745	LOC_Os07g11560	-	expressed protein	5.48123
D7_6373955_1065	6373955	D1065	<R>	0.468	0.399557	3.30195e-06	PAV	6372667	6374745	LOC_Os07g11560	-	expressed protein	5.48123
218748205	6416298	C	G	0.428	0.411492	3.34644e-06	missense	6416019	6416720	LOC_Os07g11630	-	LTPL163 - Protease inhibitor/seed storage/LTP family protein precursor, expressed	5.47542
218398478_1	6066571	V	R	0.31	0.381039	4.74724e-06	indel	6062889	6069317	LOC_Os07g11020	+	rc - bHLH transcription factor regulating proanthocyanidin production in seeds, expressed	5.32356
218748386	6416479	C	G	0.449	0.384458	4.76725e-06	missense	6416019	6416720	LOC_Os07g11630	-	LTPL163 - Protease inhibitor/seed storage/LTP family protein precursor, expressed	5.32173
218467875_TT	6135968	V	R	0.261	0.398821	5.6521e-06	indel	6134015	6136780	LOC_Os07g11110	+	NAD dependent epimerase/dehydratase family protein, putative, expressed	5.24779
218568619	6236712	A	C	0.465	0.394649	6.06794e-06	start_gain	6234811	6236853	LOC_Os07g11300	-	expressed protein	5.21696
D7_6373954_1	6373954	D1	<R>	0.444	0.374647	6.82793e-06	PAV	6372667	6374745	LOC_Os07g11560	-	expressed protein	5.16571
218467071_T	6135164	V	R	0.236	0.384671	7.62845e-06	indel	6134015	6136780	LOC_Os07g11110	+	NAD dependent epimerase/dehydratase family protein, putative, expressed	5.11756
218748203	6416296	T	C	0.425	0.396566	8.1376e-06	missense	6416019	6416720	LOC_Os07g11630	-	LTPL163 - Protease inhibitor/seed storage/LTP family protein precursor, expressed	5.0895
218422608	6090701	G	C	0.322	0.383117	9.81584e-06	missense	6089992	6091035	LOC_Os07g11050	+	IPP transferase, putative, expressed	5.00807
D7_6349223_59	6349223	D59	<R>	0.478	0.373861	1.71313e-05	PAV	6349272	6349724	LOC_Os07g11530	+	latency associated nuclear antigen, putative, expressed	4.76621
D7_6349282_89	6349282	D89	<R>	0.478	0.373861	1.71313e-05	PAV	6349272	6349724	LOC_Os07g11530	+	latency associated nuclear antigen, putative, expressed	4.76621
D7_6349371_394	6349371	D394	<R>	0.478	0.373861	1.71313e-05	PAV	6349272	6349724	LOC_Os07g11530	+	latency associated nuclear antigen, putative, expressed	4.76621
218748395	6416488	G	T	0.45	0.364971	1.80948e-05	missense	6416019	6416720	LOC_Os07g11630	-	LTPL163 - Protease inhibitor/seed storage/LTP family protein precursor, expressed	4.74245
D7_6373953_1	6373953	D1	<R>	0.441	0.351887	1.98771e-05	PAV	6372667	6374745	LOC_Os07g11560	-	expressed protein	4.70165
218573352	6241445	C	T	0.467	0.369337	2.08241e-05	missense	6241368	6241999	LOC_Os07g11320	-	RAL1 - Seed allergenic protein RA5/RA14/RA17 precursor, expressed	4.68143
218573438	6241531	A	T	0.469	0.366839	2.32517e-05	missense	6241368	6241999	LOC_Os07g11320	-	RAL1 - Seed allergenic protein RA5/RA14/RA17 precursor, expressed	4.63355
218573439	6241532	G	T	0.469	0.366839	2.32517e-05	missense	6241368	6241999	LOC_Os07g11320	-	RAL1 - Seed allergenic protein RA5/RA14/RA17 precursor, expressed	4.63355
218576281	6244374	G	A	0.464	0.367641	2.35204e-05	missense	6244130	6244880	LOC_Os07g11330	-	RAL2 - Seed allergenic protein RA5/RA14/RA17 precursor, expressed	4.62856
218573541	6241634	A	C	0.473	0.371557	2.41595e-05	missense	6241368	6241999	LOC_Os07g11320	-	RAL1 - Seed allergenic protein RA5/RA14/RA17 precursor, expressed	4.61691
218586855_3	6254948	V	R	0.446	0.343809	2.60497e-05	indel	6254861	6255627	LOC_Os07g11360	-	RAL3 - Seed allergenic protein RA5/RA14/RA17 precursor, expressed	4.5842
218576575	6244668	T	C	0.478	0.370657	2.77292e-05	missense	6244130	6244880	LOC_Os07g11330	-	RAL2 - Seed allergenic protein RA5/RA14/RA17 precursor, expressed	4.55706
218576191	6244284	A	G	0.474	0.365483	3.00963e-05	missense	6244130	6244880	LOC_Os07g11330	-	RAL2 - Seed allergenic protein RA5/RA14/RA17 precursor, expressed	4.52149
218576192	6244285	T	C	0.474	0.365483	3.00963e-05	missense	6244130	6244880	LOC_Os07g11330	-	RAL2 - Seed allergenic protein RA5/RA14/RA17 precursor, expressed	4.52149
218764511	6432604	G	C	0.426	0.355779	3.14298e-05	missense	6432376	6433170	LOC_Os07g11650	-	LTPL164 - Protease inhibitor/seed storage/LTP family protein precursor, expressed	4.50266
218565969	6234062	C	G	0.483	0.363822	3.17063e-05	missense	6232593	6234546	LOC_Os07g11290	+	expressed protein	4.49885
218748461	6416554	T	A	0.437	0.349905	3.33767e-05	missense	6416019	6416720	LOC_Os07g11630	-	LTPL163 - Protease inhibitor/seed storage/LTP family protein precursor, expressed	4.47656
218587254	6255347	T	C	0.48	0.364301	3.34218e-05	missense	6254861	6255627	LOC_Os07g11360	-	RAL3 - Seed allergenic protein RA5/RA14/RA17 precursor, expressed	4.47597
218565922	6234015	G	A	0.481	0.362895	3.72237e-05	missense	6232593	6234546	LOC_Os07g11290	+	expressed protein	4.42918
218573658	6241751	C	T	0.481	0.362895	3.72237e-05	missense	6241368	6241999	LOC_Os07g11320	-	RAL1 - Seed allergenic protein RA5/RA14/RA17 precursor, expressed	4.42918
218587288	6255381	C	T	0.48	0.360453	3.81656e-05	missense	6254861	6255627	LOC_Os07g11360	-	RAL3 - Seed allergenic protein RA5/RA14/RA17 precursor, expressed	4.41833
218588831	6256924	A	T	0.496	0.350441	3.82411e-05	missense	6256550	6256969	LOC_Os07g11370	+	expressed protein	4.41747
218764951	6433044	G	C	0.359	0.385553	3.83799e-05	missense	6432376	6433170	LOC_Os07g11650	-	LTPL164 - Protease inhibitor/seed storage/LTP family protein precursor, expressed	4.4159
218576197	6244290	C	T	0.476	0.361044	3.90368e-05	missense	6244130	6244880	LOC_Os07g11330	-	RAL2 - Seed allergenic protein RA5/RA14/RA17 precursor, expressed	4.40853
218573498	6241591	T	C	0.467	0.356368	4.13578e-05	missense	6241368	6241999	LOC_Os07g11320	-	RAL1 - Seed allergenic protein RA5/RA14/RA17 precursor, expressed	4.38344
218422605	6090698	G	C	0.306	0.355146	4.5319e-05	missense	6089992	6091035	LOC_Os07g11050	+	IPP transferase, putative, expressed	4.34372
218573648	6241741	G	A	0.48	0.35917	4.5457e-05	missense	6241368	6241999	LOC_Os07g11320	-	RAL1 - Seed allergenic protein RA5/RA14/RA17 precursor, expressed	4.3424
218573705	6241798	G	A	0.48	0.355277	4.63511e-05	missense	6241368	6241999	LOC_Os07g11320	-	RAL1 - Seed allergenic protein RA5/RA14/RA17 precursor, expressed	4.33394
218573363	6241456	T	C	0.467	0.353309	4.64352e-05	missense	6241368	6241999	LOC_Os07g11320	-	RAL1 - Seed allergenic protein RA5/RA14/RA17 precursor, expressed	4.33315
218573300	6241393	G	T	0.476	0.356269	4.79158e-05	missense	6241368	6241999	LOC_Os07g11320	-	RAL1 - Seed allergenic protein RA5/RA14/RA17 precursor, expressed	4.31952
218747978_C	6416071	V	R	0.252	0.310931	4.79486e-05	indel	6416019	6416720	LOC_Os07g11630	-	LTPL163 - Protease inhibitor/seed storage/LTP family protein precursor, expressed	4.31922
218573340_3	6241433	V	R	0.369	0.308214	4.88474e-05	indel	6241368	6241999	LOC_Os07g11320	-	RAL1 - Seed allergenic protein RA5/RA14/RA17 precursor, expressed	4.31116
218573697	6241790	T	C	0.476	0.35791	5.29539e-05	missense	6241368	6241999	LOC_Os07g11320	-	RAL1 - Seed allergenic protein RA5/RA14/RA17 precursor, expressed	4.2761
218573313	6241406	T	C	0.473	0.352833	5.52196e-05	missense	6241368	6241999	LOC_Os07g11320	-	RAL1 - Seed allergenic protein RA5/RA14/RA17 precursor, expressed	4.25791
218573312	6241405	T	C	0.475	0.352128	5.82766e-05	missense	6241368	6241999	LOC_Os07g11320	-	RAL1 - Seed allergenic protein RA5/RA14/RA17 precursor, expressed	4.23451
218573550	6241643	G	A	0.471	0.351467	5.90724e-05	missense	6241368	6241999	LOC_Os07g11320	-	RAL1 - Seed allergenic protein RA5/RA14/RA17 precursor, expressed	4.22862
218573892	6241985	G	C	0.467	0.353104	5.91365e-05	missense	6241368	6241999	LOC_Os07g11320	-	RAL1 - Seed allergenic protein RA5/RA14/RA17 precursor, expressed	4.22814
D7_6613394_101	6613394	D101	<R>	0.353	0.306336	5.93875e-05	PAV	6613131	6613762	LOC_Os07g11920	-	PROLM22 - Prolamin precursor, expressed	4.2263
D7_6613495_8	6613495	D8	<R>	0.353	0.306336	5.93875e-05	PAV	6613131	6613762	LOC_Os07g11920	-	PROLM22 - Prolamin precursor, expressed	4.2263
218573495	6241588	A	C	0.467	0.353007	6.03741e-05	missense	6241368	6241999	LOC_Os07g11320	-	RAL1 - Seed allergenic protein RA5/RA14/RA17 precursor, expressed	4.21915
218573547	6241640	C	T	0.474	0.351431	6.0482e-05	missense	6241368	6241999	LOC_Os07g11320	-	RAL1 - Seed allergenic protein RA5/RA14/RA17 precursor, expressed	4.21837
218576339	6244432	C	T	0.476	0.353264	6.18348e-05	missense	6244130	6244880	LOC_Os07g11330	-	RAL2 - Seed allergenic protein RA5/RA14/RA17 precursor, expressed	4.20877
218573690	6241783	T	C	0.483	0.353052	6.23663e-05	missense	6241368	6241999	LOC_Os07g11320	-	RAL1 - Seed allergenic protein RA5/RA14/RA17 precursor, expressed	4.20505
218576540	6244633	T	C	0.48	0.350048	6.23777e-05	missense	6244130	6244880	LOC_Os07g11330	-	RAL2 - Seed allergenic protein RA5/RA14/RA17 precursor, expressed	4.20497
218573702	6241795	A	G	0.476	0.34899	6.60579e-05	missense	6241368	6241999	LOC_Os07g11320	-	RAL1 - Seed allergenic protein RA5/RA14/RA17 precursor, expressed	4.18008
218765038_T	6433131	V	R	0.435	0.320178	6.68604e-05	indel	6432376	6433170	LOC_Os07g11650	-	LTPL164 - Protease inhibitor/seed storage/LTP family protein precursor, expressed	4.17483
D7_6613503_63	6613503	D63	<R>	0.346	0.303654	6.6904e-05	PAV	6613131	6613762	LOC_Os07g11920	-	PROLM22 - Prolamin precursor, expressed	4.17455
D7_6613566_83	6613566	D83	<R>	0.346	0.303654	6.6904e-05	PAV	6613131	6613762	LOC_Os07g11920	-	PROLM22 - Prolamin precursor, expressed	4.17455
D7_6613649_115	6613649	D115	<R>	0.346	0.303654	6.6904e-05	PAV	6613131	6613762	LOC_Os07g11920	-	PROLM22 - Prolamin precursor, expressed	4.17455
218573556	6241649	G	C	0.469	0.348804	6.7968e-05	missense	6241368	6241999	LOC_Os07g11320	-	RAL1 - Seed allergenic protein RA5/RA14/RA17 precursor, expressed	4.1677
218573279	6241372	T	C	0.48	0.351159	6.86435e-05	missense	6241368	6241999	LOC_Os07g11320	-	RAL1 - Seed allergenic protein RA5/RA14/RA17 precursor, expressed	4.1634
218573289	6241382	T	C	0.48	0.351159	6.86435e-05	missense	6241368	6241999	LOC_Os07g11320	-	RAL1 - Seed allergenic protein RA5/RA14/RA17 precursor, expressed	4.1634
218573336	6241429	G	A	0.467	0.344859	6.88481e-05	missense	6241368	6241999	LOC_Os07g11320	-	RAL1 - Seed allergenic protein RA5/RA14/RA17 precursor, expressed	4.16211
218573643_A	6241736	V	R	0.466	0.346446	7.09689e-05	indel	6241368	6241999	LOC_Os07g11320	-	RAL1 - Seed allergenic protein RA5/RA14/RA17 precursor, expressed	4.14893
D7_6373952_1	6373952	D1	<R>	0.431	0.32043	7.13113e-05	PAV	6372667	6374745	LOC_Os07g11560	-	expressed protein	4.14684
218576337	6244430	A	T	0.474	0.34776	7.33611e-05	missense	6244130	6244880	LOC_Os07g11330	-	RAL2 - Seed allergenic protein RA5/RA14/RA17 precursor, expressed	4.13453
218576645	6244738	T	C	0.471	0.342991	7.46134e-05	missense	6244130	6244880	LOC_Os07g11330	-	RAL2 - Seed allergenic protein RA5/RA14/RA17 precursor, expressed	4.12718
218400185_A	6068278	V	R	0.29	0.324874	7.4943e-05	indel	6062889	6069317	LOC_Os07g11020	+	rc - bHLH transcription factor regulating proanthocyanidin production in seeds, expressed	4.12527
218748036_TAC	6416129	V	R	0.408	0.31688	7.54223e-05	indel	6416019	6416720	LOC_Os07g11630	-	LTPL163 - Protease inhibitor/seed storage/LTP family protein precursor, expressed	4.1225
218573450	6241543	G	A	0.456	0.340753	8.9182e-05	missense	6241368	6241999	LOC_Os07g11320	-	RAL1 - Seed allergenic protein RA5/RA14/RA17 precursor, expressed	4.04972
218576333	6244426	T	G	0.476	0.345351	9.00951e-05	missense	6244130	6244880	LOC_Os07g11330	-	RAL2 - Seed allergenic protein RA5/RA14/RA17 precursor, expressed	4.0453
218533807	6201900	C	T	0.479	0.341609	9.07791e-05	missense	6201094	6201952	LOC_Os07g11250	+	expressed protein	4.04201
D7_6613070_144	6613070	D144	<R>	0.349	0.297462	9.90086e-05	PAV	6613131	6613762	LOC_Os07g11920	-	PROLM22 - Prolamin precursor, expressed	4.00433
D7_6613214_180	6613214	D180	<R>	0.349	0.297462	9.90086e-05	PAV	6613131	6613762	LOC_Os07g11920	-	PROLM22 - Prolamin precursor, expressed	4.00433
218576653	6244746	G	A	0.449	0.334407	0.000103135	missense	6244130	6244880	LOC_Os07g11330	-	RAL2 - Seed allergenic protein RA5/RA14/RA17 precursor, expressed	3.98659
218571137	6239230	G	A	0.453	0.334373	0.000105359	missense	6238911	6239615	LOC_Os07g11310	-	LTPL166 - Protease inhibitor/seed storage/LTP family protein precursor, expressed	3.97733
218591480	6259573	G	A	0.483	0.340049	0.000119494	missense	6258913	6259695	LOC_Os07g11380	-	RAL4 - Seed allergenic protein RA5/RA14/RA17 precursor, expressed	3.92265
218591481	6259574	C	T	0.483	0.340049	0.000119494	missense	6258913	6259695	LOC_Os07g11380	-	RAL4 - Seed allergenic protein RA5/RA14/RA17 precursor, expressed	3.92265
218573627	6241720	C	T	0.473	0.341394	0.000125209	missense	6241368	6241999	LOC_Os07g11320	-	RAL1 - Seed allergenic protein RA5/RA14/RA17 precursor, expressed	3.90236
218399978_ACGCGAAAAGTCGG	6068071	V	R	0.216	0.320586	0.000130226	indel	6062889	6069317	LOC_Os07g11020	+	rc - bHLH transcription factor regulating proanthocyanidin production in seeds, expressed	3.8853
218573563	6241656	T	C	0.466	0.336415	0.000134383	missense	6241368	6241999	LOC_Os07g11320	-	RAL1 - Seed allergenic protein RA5/RA14/RA17 precursor, expressed	3.87165
D7_6611275_222	6611275	D222	<R>	0.349	0.295513	0.000135255	PAV	6611125	6611758	LOC_Os07g11910	-	PROLM20 - Prolamin precursor, expressed	3.86885
218748217	6416310	C	G	0.379	0.350386	0.000145205	missense	6416019	6416720	LOC_Os07g11630	-	LTPL163 - Protease inhibitor/seed storage/LTP family protein precursor, expressed	3.83802
218764985_1	6433078	V	R	0.423	0.302588	0.000156016	indel	6432376	6433170	LOC_Os07g11650	-	LTPL164 - Protease inhibitor/seed storage/LTP family protein precursor, expressed	3.80683
218465258	6133351	G	A	0.315	0.339079	0.000178844	missense	6132917	6133364	LOC_Os07g11100	-	hypothetical protein	3.74753
218588724	6256817	A	G	0.469	0.336141	0.000186381	missense	6256550	6256969	LOC_Os07g11370	+	expressed protein	3.7296
218573394	6241487	T	G	0.463	0.323314	0.000187389	missense	6241368	6241999	LOC_Os07g11320	-	RAL1 - Seed allergenic protein RA5/RA14/RA17 precursor, expressed	3.72726
D7_6611497_63	6611497	D63	<R>	0.353	0.290394	0.000205082	PAV	6611125	6611758	LOC_Os07g11910	-	PROLM20 - Prolamin precursor, expressed	3.68807
D7_6611560_198	6611560	D198	<R>	0.353	0.290394	0.000205082	PAV	6611125	6611758	LOC_Os07g11910	-	PROLM20 - Prolamin precursor, expressed	3.68807
D7_6611758_116	6611758	D116	<R>	0.353	0.290394	0.000205082	PAV	6611125	6611758	LOC_Os07g11910	-	PROLM20 - Prolamin precursor, expressed	3.68807
D7_6611022_147	6611022	D147	<R>	0.339	0.287004	0.000220116	PAV	6611125	6611758	LOC_Os07g11910	-	PROLM20 - Prolamin precursor, expressed	3.65735
D7_6611169_38	6611169	D38	<R>	0.339	0.287004	0.000220116	PAV	6611125	6611758	LOC_Os07g11910	-	PROLM20 - Prolamin precursor, expressed	3.65735
D7_6611207_68	6611207	D68	<R>	0.339	0.287004	0.000220116	PAV	6611125	6611758	LOC_Os07g11910	-	PROLM20 - Prolamin precursor, expressed	3.65735
218472981_12	6141074	V	R	0.29	0.326136	0.000223124	indel	6137056	6141197	LOC_Os07g11120	-	hydrolase, NUDIX family, domain containing protein, expressed	3.65145
218573597	6241690	G	A	0.469	0.32412	0.000228642	missense	6241368	6241999	LOC_Os07g11320	-	RAL1 - Seed allergenic protein RA5/RA14/RA17 precursor, expressed	3.64084
DEL_450184	6609489	D	R	0.271	0.282969	0.000242882	large_del	6609124	6609689	LOC_Os07g11900	-	PROLM19 - Prolamin precursor, putative, expressed	3.6146
218469101_CA	6137194	V	R	0.305	0.317372	0.000288089	indel	6137056	6141197	LOC_Os07g11120	-	hydrolase, NUDIX family, domain containing protein, expressed	3.54047
218440180_A	6108273	V	R	0.3	0.31788	0.000292615	indel	6108034	6115547	LOC_Os07g11060	-	expressed protein	3.5337
218468143_T	6136236	V	R	0.272	0.300674	0.000303887	indel	6134015	6136780	LOC_Os07g11110	+	NAD dependent epimerase/dehydratase family protein, putative, expressed	3.51729
218588721	6256814	G	A	0.465	0.323466	0.000359631	missense	6256550	6256969	LOC_Os07g11370	+	expressed protein	3.44414
218441388_AA	6109481	V	R	0.312	0.29409	0.000361988	indel	6108034	6115547	LOC_Os07g11060	-	expressed protein	3.44131
218588734	6256827	C	T	0.441	0.315155	0.000420116	missense	6256550	6256969	LOC_Os07g11370	+	expressed protein	3.37663
218573400	6241493	C	G	0.44	0.302185	0.000424477	missense	6241368	6241999	LOC_Os07g11320	-	RAL1 - Seed allergenic protein RA5/RA14/RA17 precursor, expressed	3.37215
218649768	6317861	A	G	0.432	0.321439	0.000436561	start_gain	6315705	6318057	LOC_Os07g11490	-	expressed protein	3.35996
218573412	6241505	A	C	0.44	0.301921	0.000480985	missense	6241368	6241999	LOC_Os07g11320	-	RAL1 - Seed allergenic protein RA5/RA14/RA17 precursor, expressed	3.31787
218473030_2	6141123	V	R	0.303	0.308823	0.000502514	indel	6137056	6141197	LOC_Os07g11120	-	hydrolase, NUDIX family, domain containing protein, expressed	3.29885
218533212	6201305	G	C	0.467	0.301388	0.000557764	missense	6201094	6201952	LOC_Os07g11250	+	expressed protein	3.25355
218398000_1	6066093	V	R	0.236	0.312496	0.000601651	indel	6062889	6069317	LOC_Os07g11020	+	rc - bHLH transcription factor regulating proanthocyanidin production in seeds, expressed	3.22066
D7_6416410_1	6416410	D1	<R>	0.071	0.380902	0.000693629	PAV	6416019	6416720	LOC_Os07g11630	-	LTPL163 - Protease inhibitor/seed storage/LTP family protein precursor, expressed	3.15887
