# Supplementary material for: Enriched-GWAS and Transcriptome Analysis to Refine and Characterize a Major QTL for Anaerobic Germination Tolerance in Rice
Source: Int J Mol Sci. 2021 Apr 24;22(9):4445. doi: 10.3390/ijms22094445 (PMC8123023; doi:10.3390/ijms22094445)
Supplement: Supplementary file 1 [file ijms-22-04445-s001.zip › Suppl_File8.xlsx]

## Sheet: META
	Supplementary File 8. Modeling phenotype by haplotype groups using binomial GLM
Sheets	Description
GLM	P-values from binomial generalized linear model run in each haplotype block inside the peak
SanpleInfo	Sample data that was used for the GLM, including 1) haplotypes in the 6 regions (columns R1- R6), phenotype, and PCA scores.	Data in columns Country,Region,SubpopK9 are taken from Wang et al 2018 ; SubpopK15 is taken from Zhou et al 2020.
Sample_5groups	Assignment of samples to 5 haplotype groups in Figure 4.

## Sheet: GLM
RegionID	Chr	start_Mb	end_Mb	estimate_of_effect	std.error	statistic	glm_pvalue	glm_logP	glmmTMB_pvalue	glmmTMB_logP
R1	7	6.065	6.083	1.20684	0.134731	8.95744	3.32299e-19	18.4785	5.17262e-16	15.2863
R2	7	6.083	6.145	1.20744	0.140901	8.56944	1.03994e-17	16.983	2.68288e-14	13.5714
R3	7	6.145	6.26	1.17077	0.146393	7.99745	1.27025e-15	14.8961	1.59155e-13	12.7982
R4	7	6.26	6.35	1.1703	0.147294	7.94536	1.93631e-15	14.713	1.92072e-13	12.7165
R5	7	6.35	6.45	1.18959	0.142663	8.33849	7.5244e-17	16.1235	9.56291e-15	14.0194
R6	7	6.45	6.62	0.929991	0.130208	7.14235	9.17492e-13	12.0374	8.66513e-12	11.0622

## Sheet: SampleInfo
Table 1
ID	R1	R2	R3	R4	R5	R6	Mean21	logit	Country	Region	SubpopK9	SubpopK15	PC1	PC2	PC3	PC4	PC5
IRIS_313-10007	H0	H0	H54	H18	H15	H28	0.0222222	-3.78419	Nepal	SAC	indx	indx	-0.00796627	-0.0543061	0.0146735	0.0389415	-0.0137776
IRIS_313-10016	H0	H0	H0	H0	H0	H0	0.0314815	-3.42637	Iran	WAS	indx	indx	-0.0196216	0.0101607	-0.0125308	-0.112107	-0.0111402
IRIS_313-10047	H0	H0	H0	H0	H0	H0	0.15	-1.7346	Nigeria	WAF	ind1A	ind1A	-0.0339773	0.0619776	-0.0154817	-0.10257	-0.0483015
IRIS_313-10054	H0	H0	H0	H0	H0	H0	0	NA	Panama	CAM	indx	ind1B-1	0.00802912	-0.0219325	-0.0914725	-0.10269	-0.0838078
IRIS_313-10154	H0	H0	H0	H0	H0	H0	0.00740741	-4.89784	China	EAS	ind1A	ind1A	-0.0399091	0.0741007	0.0194737	0.0442714	-0.0264787
IRIS_313-10168	H0	H0	H54	H18	H15	H28	0.00555556	-5.18739	China	EAS	indx	indx	-0.0330496	0.00749257	0.0696795	0.0555359	-0.0719861
IRIS_313-10171	H0	H0	H0	H0	H0	H0	0.0166667	-4.07754	China	EAS	ind1A	ind1A	-0.0296441	0.0559494	0.0153452	0.0294546	-0.0409222
IRIS_313-10178	H2	H16	H54	H18	H15	H28	0.0796296	-2.44739	China	EAS	ind1A	ind1A	-0.0261388	0.0584623	0.00749801	0.00561947	0.052816
IRIS_313-10189	H0	H0	H0	H0	H0	H0	0.0222222	-3.78419	China	EAS	ind1A	ind1A	-0.0301611	0.0454091	0.0058589	0.0105725	0.019462
IRIS_313-10190	H0	H0	H0	H0	H0	H0	0.0166667	-4.07754	China	EAS	ind1A	ind1A	-0.0205796	0.0528701	-0.00927655	-0.0286292	0.0530373
IRIS_313-10191	H0	H0	H0	H0	H0	H0	0.0203704	-3.87309	China	EAS	ind1A	ind1A	-0.0277068	0.0345567	0.0163645	0.000272584	0.00229263
IRIS_313-10211	H0	H0	H0	H0	H0	H0	0.112963	-2.06083	China	EAS	ind1A	ind1A	-0.04041	0.0771916	0.0216723	0.0685185	-0.00689023
IRIS_313-10221	H2	H16	H54	H18	H15	H28	0.0759259	-2.49903	China	EAS	indx	ind3B-2	-0.0144516	-0.0233766	-0.00918158	-0.0349329	0.151712
IRIS_313-10224	H2	H16	H54	H18	H15	H0	0.125926	-1.93747	China	EAS	ind1A	ind1A	-0.0290193	0.0598985	-0.00283794	-0.0146565	0.0440726
IRIS_313-10226	H0	H16	H54	H18	H15	H28	0.0833333	-2.3979	China	EAS	indx	ind3B-2	-0.0102862	-0.0271498	0.00948052	-0.0548053	0.169609
IRIS_313-10239	H2	H16	H54	H18	H15	H0	0.146296	-1.76395	China	EAS	indx	ind3B-2	-0.00978876	-0.0147371	-0.00390134	-0.0339519	0.140965
IRIS_313-10257	H0	H0	H0	H0	H0	H0	0.0111111	-4.48864	Nicaragua	CAM	indx	indx	0.00235222	-0.0356664	-0.0467271	-0.108059	-0.0630946
IRIS_313-10268	H0	H0	H0	H0	H0	H0	0.00555556	-5.18739	Venezuela	SAM	indx	indx	0.0140468	-0.0348401	-0.0571639	-0.156746	-0.104828
IRIS_313-10271	H0	H0	H0	H0	H0	H0	0.00555556	-5.18739	Cuba	CAM	indx	indx	-0.0151803	-0.0324042	0.00983371	-0.089669	-0.0370012
IRIS_313-10289	H0	H0	H0	H0	H0	H0	0.00925926	-4.67283	Venezuela	SAM	ind1B	indx	-0.00747584	-0.0252428	-0.0611397	-0.110042	-0.0768503
IRIS_313-10314	H0	H0	H0	H0	H0	H0	0	NA	Ecuador	SAM	indx	indx	-0.0142359	-0.0170714	-0.0457455	-0.12214	-0.0971139
IRIS_313-10359	H0	H0	H0	H0	H0	H0	0.012963	-4.33261	Philippines	SER-IRRI	indx	indx	0.0558294	-0.00316363	-0.0615998	-0.0745849	-0.0653215
IRIS_313-10371	H0	H0	H0	H0	H0	H0	0	NA	Philippines	SER-IRRI	indx	indx	0.0356738	-0.0121724	-0.0605824	-0.0765804	-0.0722726
IRIS_313-10380	H2	H16	H54	H18	H15	H28	0.174074	-1.55702	Philippines	SER-IRRI	aus	aus1	0.139382	0.0308097	0.00887749	-0.0400165	0.00135379
IRIS_313-10449	H0	H0	H0	H0	H0	H0	0	NA	China	EAS	ind1A	ind1A	-0.00545308	0.0536604	0.0108461	0.0126152	0.0141893
IRIS_313-10450	H0	H0	H0	H0	H0	H0	0.0462963	-3.02529	China	EAS	ind1A	ind1A	-0.0368606	0.0752842	0.017185	0.0140384	0.0119456
IRIS_313-10452	H2	H16	H54	H18	H15	H28	0.0148148	-4.1972	China	EAS	ind1A	ind1A	-0.0323537	0.0559142	0.00592408	-0.0281085	0.034842
IRIS_313-10458	H2	H16	H54	H18	H15	H28	0.125926	-1.93747	China	EAS	ind1A	ind1A	-0.0312722	0.0528006	0.0195145	0.0361364	0.00248871
IRIS_313-10476	H2	H16	H54	H18	H15	H28	0.0166667	-4.07754	Sri Lanka	IOC	ind2	ind2B	0.017005	-0.0274782	-0.150343	0.111543	-0.00666915
IRIS_313-10497	H0	H0	H0	H0	H0	H0	0.0333333	-3.3673	China	EAS	ind1A	ind1A	-0.0345949	0.0666474	0.00417871	-0.0491909	0.0236368
IRIS_313-10502	H0	H0	H0	H0	H0	H0	0.0537037	-2.86907	China	EAS	ind1A	ind1A	-0.030221	0.0551103	0.00727989	0.00684504	0.0123962
IRIS_313-10503	H0	H0	H0	H0	H0	H0	0.00925926	-4.67283	China	EAS	ind1A	indx	-0.0243979	0.0341956	-0.0066661	0.00188411	0.0290216
IRIS_313-10504	H0	H0	H0	H0	H0	H0	0.00925926	-4.67283	China	EAS	ind1A	ind1A	-0.0369863	0.0719204	0.0228329	0.0708534	0.0253834
IRIS_313-10515	H0	H0	H0	H0	H0	H0	0.107407	-2.1175	Taiwan	EAR	ind1A	ind1A	-0.0362335	0.0632602	-0.00122089	-0.0560442	0.0064605
IRIS_313-10518	H0	H0	H54	H18	H15	H28	0.0277778	-3.55535	Myanmar	SEA	indx	indx	-0.011715	-0.043765	0.0116916	0.039898	-0.0092222
IRIS_313-10534	H2	H16	H54	H18	H15	H0	0.0425926	-3.11255	India	SAC	aus	aus2	0.211121	0.0562231	0.0553228	0.000469969	0.00624452
IRIS_313-10544	H2	H16	H54	H18	H15	H28	0.0925926	-2.28238	India	SAC	ind2	ind2B	0.0104747	-0.0262281	-0.0961741	0.0902589	-0.00936753
IRIS_313-10560	H0	H0	H0	H0	H0	H0	0.0314815	-3.42637	China	EAS	ind1A	ind1A	-0.0264548	0.0699277	-0.0026929	-0.0584489	0.0357512
IRIS_313-10561	H0	H0	H0	H0	H0	H0	0.0388889	-3.20738	China	EAS	ind1A	ind1A	-0.0451164	0.0901944	0.0480676	0.0724572	-0.0664181
IRIS_313-10614	H2	H16	H54	H18	H15	H0	0.05	-2.94444	Hong Kong	EAS	indx	ind3B-2	0.00189814	-0.0104931	-0.00943178	-0.0683543	0.160197
IRIS_313-10623	H2	H16	H54	H18	H15	H0	0.0166667	-4.07754	Nepal	SAC	aus	aus2	0.20157	0.0499305	0.0372465	-0.000481796	-0.0156023
IRIS_313-10651	H0	H0	H54	H18	H15	H28	0.0222222	-3.78419	Lao People's Democratic Republic	SEA	indx	ind3B-1	-0.0140336	-0.0649014	0.0732596	0.0410094	-0.0337689
IRIS_313-10662	H2	H16	H54	H18	H15	H28	0.05	-2.94444	Sri Lanka	IOC	ind2	ind2B	0.0187273	-0.0306877	-0.145208	0.108545	-0.013221
IRIS_313-10666	H0	H0	H54	H18	H15	H28	0.0333333	-3.3673	India	SAC	indx	ind3B-1	-0.0155234	-0.0576764	0.0521445	0.0293057	-0.0170891
IRIS_313-10671	H2	H16	H54	H18	H15	H28	0.0888889	-2.32728	India	SAC	indx	indx	0.0375077	-0.000839197	-0.011422	0.0368255	0.00408417
IRIS_313-10673	H2	H16	H54	H18	H15	H28	0.0611111	-2.732	India	SAC	aus	aus2	0.215966	0.0549728	0.0628742	0.0078798	-0.00956408
IRIS_313-10674	H2	H16	H54	H18	H0	H0	0.0314815	-3.42637	India	SAC	indx	indx	-0.00568266	-0.0467438	-0.011918	0.034435	-0.0150998
IRIS_313-10675	H2	H16	H54	H18	H15	H0	0.0481481	-2.98413	India	SAC	indx	indx	0.0172814	-0.0198629	-0.0143287	0.0362849	0.000142259
IRIS_313-10681	H0	H0	H54	H18	H15	H28	0.00555556	-5.18739	Lao People's Democratic Republic	SEA	ind3	ind3B-1	-0.0166194	-0.0788949	0.103844	0.0169887	-0.0424965
IRIS_313-10715	H2	H16	H54	H18	H15	H28	0	NA	Sri Lanka	IOC	ind2	ind2B	0.0277838	-0.0235017	-0.0903716	0.0674716	0.00197201
IRIS_313-10716	H2	H16	H54	H18	H15	H28	0	NA	Sri Lanka	IOC	ind2	ind2B	0.0188847	-0.0279134	-0.130137	0.0873193	-0.0196821
IRIS_313-10717	H2	H16	H54	H18	H15	H28	0	NA	Sri Lanka	IOC	ind2	ind2B	0.0254378	-0.0249288	-0.108396	0.0920182	-0.00151866
IRIS_313-10748	H0	H16	H54	H18	H15	H0	0.0388889	-3.20738	Viet Nam	SEA	indx	ind3B-2	-0.0142749	-0.0287738	-0.0126062	-0.0224035	0.102291
IRIS_313-10751	H2	H16	H54	H18	H15	H0	0.0277778	-3.55535	Viet Nam	SEA	indx	indx	-0.00104043	-0.022751	0.00703743	-0.0529692	0.0942085
IRIS_313-10754	H0	H0	H0	H0	H0	H0	0.0111111	-4.48864	India	SAC	indx	indx	-0.0211883	0.0121288	-0.0312685	-0.119385	-0.0719795
IRIS_313-10762	H0	H0	H0	H0	H0	H0	0.168519	-1.59616	Indonesia	SER	ind3	ind3A	-0.00579148	-0.0459269	-0.0040134	-0.040364	0.0470121
IRIS_313-10822	H0	H0	H54	H18	H0	H0	0.0666667	-2.63906	Indonesia	SER	ind3	ind3A	0.00277754	-0.0551206	0.00013244	-0.0629257	0.0249301
IRIS_313-10835	H2	H16	H54	H18	H15	H28	0.466667	-0.133531	India	SAC	ind2	ind2B	0.0115375	-0.0246904	-0.117205	0.0620973	-0.0184745
IRIS_313-10847	H0	H0	H0	H0	H0	H0	0.0166667	-4.07754	India	SAC	indx	ind2A	-0.00729436	-0.0378579	-0.0253998	0.026106	-0.00660927
IRIS_313-10857	H2	H16	H54	H18	H15	H28	0.137037	-1.84012	India	SAC	admix	indx	0.0654226	0.00492532	-0.00904577	0.035852	0.0172643
IRIS_313-10859	H2	H16	H54	H18	H15	H28	0.0518519	-2.90612	India	SAC	indx	indx	0.0442114	-0.0113238	-0.0118106	0.0292998	0.0196675
IRIS_313-10863	H2	H16	H54	H18	H15	H28	0	NA	India	SAC	ind2	indx	-0.000114728	-0.0397944	-0.0600423	0.0465436	-0.0206828
IRIS_313-10881	H2	H16	H54	H18	H15	H0	0.00555556	-5.18739	India	SAC	admix	admix	0.11308	0.0157862	-0.0108985	-0.108507	0.0437204
IRIS_313-10917	H2	H16	H54	H18	H15	H0	0.087037	-2.35036	Philippines	SER	indx	indx	-0.00822019	-0.0119256	0.00460207	0.0381884	0.0141344
IRIS_313-10927	H2	H16	H54	H18	H15	H28	0.214815	-1.29614	Nepal	SAC	aus	aus2	0.200551	0.0433436	0.0391744	0.00290237	-0.0132823
IRIS_313-10932	H0	H0	H0	H0	H0	H0	0.0481481	-2.98413	China	EAS	ind1A	ind1A	-0.0458445	0.0903199	0.0482268	0.0738898	-0.0672096
IRIS_313-10942	H0	H0	H54	H18	H0	H0	0.0166667	-4.07754	Indonesia	SER	ind3	ind3A	-0.00230645	-0.0565638	0.00409011	-0.0522766	0.00477219
IRIS_313-10968	H0	H0	H0	H0	H0	H0	0.0962963	-2.23907	Brazil	SAM	ind1A	ind1A	-0.0413262	0.0858956	0.0252102	0.0833335	-0.00439433
IRIS_313-10977	H2	H16	H54	H18	H15	H28	0.0166667	-4.07754	Bangladesh	SAE	ind2	ind2A	0.016577	-0.0353897	-0.0410844	0.0226702	0.0123608
IRIS_313-11015	H2	H16	H54	H18	H15	H28	0.0222222	-3.78419	Bangladesh	SAE	aus	aus2	0.207638	0.0557872	0.0522442	-0.00239367	0.00819483
IRIS_313-11018	H2	H16	H54	H18	H15	H0	0.0444444	-3.06805	Bangladesh	SAE	aus	ausx	0.184608	0.0430916	0.0392174	0.0062343	-0.00213223
IRIS_313-11019	H0	H16	H54	H18	H15	H28	0.105556	-2.13697	Bangladesh	SAE	aus	aus2	0.217023	0.0574984	0.062465	0.000446225	-0.00961316
IRIS_313-11038	H0	H0	H0	H0	H0	H0	0.0981481	-2.21797	China	EAS	ind1A	ind1A	-0.0460768	0.090686	0.0482238	0.0744782	-0.0678181
IRIS_313-11039	H0	H0	H0	H0	H0	H0	0.0555556	-2.83321	China	EAS	ind1A	ind1A	-0.0465828	0.0926693	0.0355178	0.0371266	-0.075587
IRIS_313-11050	H2	H16	H54	H18	H15	H28	0	NA	Bangladesh	SAE	aus	aus2	0.216623	0.0600567	0.0572518	-0.0038701	0.00370146
IRIS_313-11052	H2	H16	H54	H18	H15	H28	0.0037037	-5.59471	Bangladesh	SAE	aus	ausx	0.186463	0.0485436	0.0374026	-0.0108997	-0.000626287
IRIS_313-11055	H2	H16	H54	H18	H15	H28	0	NA	Bangladesh	SAE	aus	aus2	0.205235	0.0507603	0.0388663	-0.0045041	-0.00776722
IRIS_313-11056	H2	H16	H54	H18	H15	H28	0.0111111	-4.48864	Bangladesh	SAE	aus	aus2	0.217115	0.056695	0.0546798	0.00599734	-0.0125194
IRIS_313-11076	H2	H16	H54	H18	H15	H28	0.0222222	-3.78419	Lao People's Democratic Republic	SEA	ind3	ind3B-1	-0.0120833	-0.0819843	0.0944067	0.0100522	-0.036134
IRIS_313-11081	H0	H0	H54	H18	H15	H28	0.0166667	-4.07754	Lao People's Democratic Republic	SEA	ind3	ind3B-1	-0.014535	-0.0925941	0.115965	0.0172468	-0.0398434
IRIS_313-11113	H2	H16	H54	H18	H15	H28	0.0259259	-3.62624	Bangladesh	SAE	ind2	indx	0.0171906	-0.048841	-0.0517041	0.0457579	0.0173869
IRIS_313-11115	H2	H16	H54	H18	H15	H28	0	NA	Bangladesh	SAE	ind2	ind2A	0.0198426	-0.0438179	-0.0398457	0.0161209	0.0121677
IRIS_313-11137	H2	H16	H54	H18	H15	H28	0.209259	-1.3294	Myanmar	SEA	indx	indx	-0.00661469	-0.0264992	-0.0194062	0.0404422	0.0260759
IRIS_313-11152	H0	H0	H0	H0	H0	H0	0.0407407	-3.15893	India	SAC	ind1A	ind1A	-0.0343411	0.0720399	0.00161318	-0.0781878	0.00213573
IRIS_313-11157	H0	H0	H0	H0	H0	H0	0.0277778	-3.55535	Taiwan	EAR	ind1A	ind1A	-0.0308912	0.0718918	0.00157589	-0.0849284	0.0143788
IRIS_313-11158	H0	H0	H0	H0	H0	H0	0.109259	-2.09833	China	EAS	ind1A	ind1A	-0.0403188	0.0922228	0.0118939	-0.00677962	-0.0353955
IRIS_313-11232	H2	H16	H54	H18	H15	H0	0.0888889	-2.32728	India	SAC	aus	aus1	0.15238	0.0324488	0.0129899	-0.0358357	0.00179587
IRIS_313-11260	H2	H16	H54	H18	H15	H28	0.0592593	-2.76475	India	SAC	indx	indx	0.0216027	-0.0343789	0.0248873	0.0116664	0.00330502
IRIS_313-11263	H0	H0	H0	H0	H0	H0	0	NA	India	SAC	indx	indx	0.0300885	-0.0513653	-0.0234716	-0.07789	-0.0152864
IRIS_313-11272	H2	H16	H54	H18	H15	H28	0.0222222	-3.78419	India	SAC	aus	aus2	0.209354	0.0536164	0.0516775	-0.00120542	-0.0099674
IRIS_313-11275	H2	H16	H54	H18	H15	H28	0.298148	-0.856132	India	SAC	indx	indx	0.0140062	-0.0151466	0.00219495	0.0432002	0.0152109
IRIS_313-11288	H0	H0	H0	H0	H0	H0	0.0111111	-4.48864	India	SAC	indx	indx	0.0156861	-0.0319369	-0.0297199	-0.0130809	-0.00579721
IRIS_313-11295	H2	H16	H54	H18	H15	H0	0.0277778	-3.55535	India	SAC	admix	admix	0.0611622	0.000706728	-0.00878627	-0.0094237	0.0406344
IRIS_313-11302	H2	H16	H54	H18	H15	H0	0.22963	-1.2104	India	SAC	indx	admix	0.0527043	-0.0214009	0.0220089	0.0169681	-0.00760431
IRIS_313-11309	H0	H0	H0	H0	H0	H0	0.0203704	-3.87309	India	SAC	indx	indx	-0.0143476	-0.0314807	0.0126276	0.0352463	0.00821357
IRIS_313-11317	H2	H16	H54	H18	H15	H28	0.0166667	-4.07754	Indonesia	SER	ind3	ind3A	0.00116525	-0.0587324	0.00454931	-0.078928	-0.00175556
IRIS_313-11321	H2	H16	H54	H18	H15	H28	0.00555556	-5.18739	Bangladesh	SAE	ind2	ind2A	0.00466279	-0.0443661	-0.040564	0.00654868	0.00567126
IRIS_313-11338	H0	H0	H0	H0	H0	H0	0	NA	Philippines	SER	indx	ind3B-2	-0.00821434	-0.0427623	0.014714	-0.0323727	0.0996432
IRIS_313-11341	H0	H0	H0	H0	H0	H0	0	NA	Philippines	SER	ind3	ind3B-1	-0.00498098	-0.0615385	0.0344218	-0.0217971	0.0459856
IRIS_313-11345	H0	H0	H0	H0	H0	H0	0.0203704	-3.87309	Philippines	SER	indx	ind3B-2	-0.0078772	-0.0392977	0.0139198	-0.028771	0.111425
IRIS_313-11347	H2	H16	H54	H18	H15	H28	0.0555556	-2.83321	Philippines	SER	indx	ind3B-2	-0.0104302	-0.0396202	0.0151627	-0.0260591	0.103178
IRIS_313-11355	H0	H0	H0	H0	H0	H0	0.0240741	-3.70225	India	SAC	indx	indx	0.0422674	0.0597466	-0.00372861	-0.0811289	-0.0457834
IRIS_313-11357	H0	H0	H0	H0	H0	H0	0	NA	India	SAC	ind1B	ind1B-1	-0.0113208	-0.00835216	-0.0870647	-0.0913261	-0.112698
IRIS_313-11363	H0	H0	H0	H0	H0	H0	0.0185185	-3.97029	India	SAC	ind2	indx	0.00447358	-0.0439821	-0.0563291	0.0357636	-0.00529099
IRIS_313-11383	H0	H0	H0	H0	H0	H0	0.00555556	-5.18739	Viet Nam	SEA	indx	indx	0.000258142	-0.0179721	0.0103905	-0.0585989	0.116081
IRIS_313-11384	H0	H0	H0	H0	H0	H0	0	NA	Viet Nam	SEA	indx	indx	0.00137074	-0.0132237	0.0123617	-0.067599	0.124934
IRIS_313-11390	H0	H0	H54	H18	H15	H28	0	NA	Thailand	SEA	ind3	ind3B-1	-0.017926	-0.0977789	0.128081	0.0265083	-0.0569339
IRIS_313-11399	H0	H16	H54	H18	H15	H28	0.0444444	-3.06805	Bangladesh	SAE	indx	ind2A	0.00248044	-0.0554912	-0.0257973	0.00327381	0.015259
IRIS_313-11403	H0	H0	H54	H0	H0	H0	0.00555556	-5.18739	India	SAC	indx	indx	-0.00275741	-0.0452176	0.0428124	0.0361405	-0.0111371
IRIS_313-11411	H2	H16	H54	H18	H15	H28	0	NA	Brazil	SAM	ind2	ind2B	0.0161961	-0.0254677	-0.106216	0.0693352	-0.00568065
IRIS_313-11433	H0	H0	H0	H0	H0	H0	0.037037	-3.2581	India	SAC	ind1A	indx	-0.0223272	0.0441	-0.0343154	-0.0879951	-0.0384629
IRIS_313-11443	H0	H0	H54	H18	H15	H28	0.05	-2.94444	India	SAC	indx	indx	-0.00816161	-0.0511989	0.022369	0.0363099	-0.0189191
IRIS_313-11446	H0	H0	H54	H18	H15	H28	0.00555556	-5.18739	India	SAC	ind2	ind2B	0.00653496	-0.0351505	-0.0950503	0.0730824	-0.0171891
IRIS_313-11458	H2	H16	H54	H18	H15	H28	0.127778	-1.92075	India	SAC	aus	aus2	0.220524	0.0544495	0.0504269	0.00580446	-0.0115619
IRIS_313-11461	H2	H16	H54	H18	H15	H28	0.125926	-1.93747	India	SAC	ind2	ind2B	0.00393145	-0.0227626	-0.108154	0.0844576	0.0106696
IRIS_313-11463	H2	H16	H54	H18	H15	H28	0.0166667	-4.07754	Philippines	SER	indx	ind3B-2	-0.0107514	-0.0362149	0.0139083	-0.0372658	0.0994295
IRIS_313-11478	H0	H0	H54	H18	H15	H28	0.0111111	-4.48864	India	SAC	ind2	ind2B	0.0627438	-0.00962805	-0.0876501	0.064547	-0.00784262
IRIS_313-11493	H0	H0	H0	H0	H0	H0	0.0555556	-2.83321	India	SAC	indx	indx	-0.00722129	-0.0478688	0.0038264	-0.0412042	-0.0107051
IRIS_313-11505	H2	H16	H54	H18	H15	H28	0.0888889	-2.32728	India	SAC	ind2	ind2B	0.00256128	-0.0261549	-0.113111	0.081565	0.00798718
IRIS_313-11510	H0	H0	H0	H0	H0	H0	0.00555556	-5.18739	Sri Lanka	IOC	indx	indx	-0.00225003	-0.0281954	-0.0598501	-0.0466433	-0.0489011
IRIS_313-11513	H0	H0	H0	H0	H0	H0	0.0277778	-3.55535	Ecuador	SAM	ind1B	ind1B-2	-0.0282863	0.0131446	-0.0379226	-0.140937	-0.103904
IRIS_313-11516	H0	H0	H0	H0	H0	H0	0.0111111	-4.48864	Philippines	SER-IRRI	indx	indx	-0.00447766	-0.0411204	-0.0807431	-0.0959158	-0.0794287
IRIS_313-11528	H0	H0	H0	H0	H0	H0	0.0185185	-3.97029	Cote d'Ivoire	WAF	ind3	ind3B-1	-0.0118018	-0.0610728	0.028334	-0.000174094	0.00421811
IRIS_313-11541	H0	H0	H54	H18	H15	H0	0	NA	Myanmar	SEA	indx	indx	-0.0151092	-0.0454254	0.0238187	0.0372283	-0.0050385
IRIS_313-11546	H0	H0	H0	H0	H0	H0	0.0148148	-4.1972	Myanmar	SEA	indx	indx	-0.0169179	-0.0336596	0.00863544	0.0454723	-0.00209263
IRIS_313-11548	H0	H0	H0	H0	H0	H0	0.00555556	-5.18739	Myanmar	SEA	indx	indx	-0.0106659	-0.037084	0.0157158	0.0358297	-0.00444747
IRIS_313-11557	H2	H16	H54	H18	H15	H28	0.0314815	-3.42637	Bangladesh	SAE	aus	aus2	0.204203	0.0512106	0.0496362	0.00587343	-0.00875616
IRIS_313-11561	H2	H16	H54	H18	H15	H28	0.0277778	-3.55535	Nepal	SAC	ind2	indx	0.0229439	-0.0346728	-0.0591564	0.046182	-0.00494309
IRIS_313-11568	H0	H0	H0	H0	H0	H0	0.12037	-1.98893	Nepal	SAC	ind1A	ind1A	-0.0390302	0.0664436	0.0249159	0.0498197	-0.0226347
IRIS_313-11570	H0	H0	H0	H0	H0	H0	0.0407407	-3.15893	China	EAS	indx	indx	-0.0129143	0.0305832	0.00310852	-0.0408542	-0.0269563
IRIS_313-11573	H2	H16	H54	H18	H15	H28	0.324074	-0.735111	China	EAS	indx	indx	-0.0192032	0.00836104	0.000693452	-0.0326685	0.0896287
IRIS_313-11577	H2	H16	H54	H18	H15	H28	0.285185	-0.918885	China	EAS	ind1A	indx	-0.0201917	0.0138146	0.004284	-0.0348079	0.0815733
IRIS_313-11579	H0	H0	H0	H0	H0	H0	0.0259259	-3.62624	China	EAS	ind1A	ind1A	-0.0301801	0.0662649	-0.00342421	-0.0796291	0.0195833
IRIS_313-11580	H0	H0	H0	H18	H15	H28	0.0259259	-3.62624	China	EAS	indx	ind3B-2	-0.00879482	-0.0154559	-0.0114458	-0.0578473	0.172418
IRIS_313-11596	H0	H0	H0	H0	H0	H0	0.0166667	-4.07754	India	SAC	indx	admix	0.0466214	0.0622078	-0.00367348	-0.0808641	-0.0221848
IRIS_313-11607	H2	H16	H54	H18	H15	H28	0.0111111	-4.48864	India	SAC	ind2	indx	0.00474201	-0.039479	-0.0736386	0.0558123	-0.00278123
IRIS_313-11622	H0	H0	H0	H0	H0	H0	0.0222222	-3.78419	China	EAS	ind1A	ind1A	-0.0377473	0.0722158	0.0163069	0.0209173	-0.0589715
IRIS_313-11624	H0	H0	H0	H0	H0	H0	0.190741	-1.4452	Nepal	SAC	ind1A	ind1A	-0.0410114	0.0757924	0.0163896	0.046872	-0.00832721
IRIS_313-11640	H2	H16	H54	H18	H15	H28	0.0333333	-3.3673	India	SAC	ind2	ind2B	0.0100908	-0.0384437	-0.0859964	0.0683684	-0.0133431
IRIS_313-11641	H0	H0	H54	H18	H15	H0	0.05	-2.94444	India	SAC	ind2	indx	0.00288815	-0.0368872	-0.0716791	0.0530675	-0.000489279
IRIS_313-11645	H0	H0	H54	H18	H15	H28	0.037037	-3.2581	India	SAC	ind2	ind2B	0.0149941	-0.0321072	-0.11972	0.0908633	-0.00466734
IRIS_313-11650	H0	H0	H54	H0	H0	H0	0.00555556	-5.18739	India	SAC	ind2	indx	0.0305288	-0.0363475	-0.0642529	0.0255226	-0.00494954
IRIS_313-11656	H0	H0	H0	H0	H0	H0	0	NA	Indonesia	SER	indx	indx	0.00217506	-0.0490268	-0.0358358	-0.134299	-0.0634933
IRIS_313-11664	H0	H0	H0	H0	H0	H0	0.0259259	-3.62624	China	EAS	indx	indx	-0.029277	-0.0146498	0.0875883	0.0463593	-0.0608514
IRIS_313-11665	H0	H0	H0	H0	H0	H0	0.0925926	-2.28238	China	EAS	ind1A	ind1A	-0.0392622	0.0615044	0.0310189	0.040339	-0.0480621
IRIS_313-11667	H0	H0	H54	H18	H15	H28	0.0444444	-3.06805	China	EAS	ind1A	ind1A	-0.038625	0.0395318	0.0461196	0.0183802	-0.0746151
IRIS_313-11668	H0	H0	H0	H0	H0	H0	0.181481	-1.50634	China	EAS	ind1A	ind1A	-0.0358421	0.0692596	0.0255847	0.0323915	-0.0625698
IRIS_313-11676	H0	H0	H54	H18	H15	H28	0	NA	Thailand	SEA	ind3	ind3B-1	-0.01311	-0.0913489	0.114412	0.010593	-0.0453736
IRIS_313-11677	H0	H0	H0	H0	H0	H0	0.00555556	-5.18739	Thailand	SEA	ind3	ind3B-1	-0.00351469	-0.0643012	0.040047	0.00108734	0.0127344
IRIS_313-11685	H0	H0	H0	H0	H0	H0	0	NA	Thailand	SEA	ind3	ind3B-1	-0.0184697	-0.0673769	0.0690869	0.0290299	-0.0175699
IRIS_313-11692	H0	H0	H0	H0	H0	H0	0.0981481	-2.21797	Taiwan	EAR	ind1A	ind1A	-0.0373222	0.0630782	0.00541203	-0.0517955	-0.00479198
IRIS_313-11694	H0	H0	H0	H0	H0	H0	0.0518519	-2.90612	Taiwan	EAR	indx	ind3B-2	-0.00608206	-0.00838316	-0.0199631	-0.057578	0.172366
IRIS_313-11695	H0	H0	H0	H0	H0	H0	0.0314815	-3.42637	Taiwan	EAR	ind1A	indx	-0.0254454	0.0227413	0.0043872	-0.0253535	0.0849826
IRIS_313-11700	H0	H0	H54	H18	H15	H28	0.0166667	-4.07754	Thailand	SEA	ind3	ind3B-1	-0.0190773	-0.0844554	0.103769	0.0224316	-0.0455398
IRIS_313-11716	H0	H0	H0	H0	H0	H0	0.0037037	-5.59471	Guinea	WAF	ind3	indx	0.00608116	-0.0490975	0.0170465	-0.026267	0.0495247
IRIS_313-11717	H0	H0	H0	H0	H0	H0	0.0037037	-5.59471	Indonesia	SER	indx	indx	-0.00725163	-0.0625512	-0.0409482	-0.109935	-0.0606679
IRIS_313-11719	H0	H0	H54	H18	H15	H28	0.0111111	-4.48864	Thailand	SEA	ind3	ind3B-1	-0.0183093	-0.0986376	0.129344	0.0268323	-0.0575113
IRIS_313-11720	H0	H0	H0	H0	H0	H0	0	NA	Thailand	SEA	ind3	ind3B-1	-0.0169912	-0.0819289	0.0784274	0.00172396	-0.00353091
IRIS_313-11721	H0	H0	H0	H0	H0	H0	0.0166667	-4.07754	Thailand	SEA	ind3	ind3B-1	-0.016443	-0.0807848	0.0855404	0.00837865	-0.0358062
IRIS_313-11723	H0	H0	H54	H18	H15	H28	0	NA	Guinea	WAF	ind2	ind2A	0.00813172	-0.0435426	-0.0470014	0.0265072	-0.0214197
IRIS_313-11724	H2	H16	H54	H18	H15	H28	0.0259259	-3.62624	Guinea	WAF	ind3	indx	-0.00175328	-0.0586609	-0.00748126	0.0039413	0.0315446
IRIS_313-11727	H0	H0	H0	H0	H0	H0	0.122222	-1.97155	China	EAS	ind1A	ind1A	-0.0377806	0.0674639	0.0107811	0.0192307	-0.0527305
IRIS_313-11728	H0	H0	H0	H0	H0	H0	0.0148148	-4.1972	China	EAS	ind3	indx	-0.0173584	-0.0483787	0.0186654	-0.00710192	0.0554583
IRIS_313-11730	H0	H0	H0	H0	H0	H0	0.0277778	-3.55535	China	EAS	indx	indx	-0.0144751	-0.0119225	-0.0217561	-0.0977143	0.0212601
IRIS_313-11731	H0	H0	H0	H0	H0	H0	0	NA	China	EAS	indx	indx	-0.026093	0.0183316	-0.00365347	-0.0532868	-0.0331788
IRIS_313-11732	H0	H0	H0	H0	H0	H0	0.0111111	-4.48864	China	EAS	ind1A	ind1A	-0.0380376	0.0690161	0.0113937	0.00593769	-0.0529383
IRIS_313-11734	H0	H0	H0	H0	H0	H0	0.0277778	-3.55535	China	EAS	ind1A	ind1A	-0.03016	0.0439767	0.00873748	-0.0434244	-0.0319689
IRIS_313-11735	H0	H0	H0	H0	H0	H0	0.0944444	-2.26054	China	EAS	indx	ind3B-2	-0.00622772	-0.0173993	-0.0304498	-0.0330619	0.135833
IRIS_313-11740	H0	H0	H0	H0	H0	H0	0	NA	Ghana	WAF	indx	ind3B-2	-0.0124294	-0.0407422	0.016262	-0.0266835	0.0881844
IRIS_313-11741	H2	H16	H54	H18	H15	H28	0.0148148	-4.1972	Sri Lanka	IOC	ind2	ind2B	0.0138962	-0.025055	-0.133148	0.106788	-0.00841749
IRIS_313-11742	H2	H16	H54	H18	H15	H28	0.0537037	-2.86907	India	SAC	aus	aus2	0.205012	0.053617	0.0412252	-0.00165797	-0.0154468
IRIS_313-11744	H0	H0	H0	H0	H0	H0	0.162963	-1.63635	China	EAS	indx	ind3B-2	-0.0142329	-0.0115423	-0.00921131	-0.0537647	0.170141
IRIS_313-11745	H0	H0	H0	H0	H0	H0	0.0222222	-3.78419	China	EAS	ind1A	ind1A	-0.0311719	0.0477665	0.000757864	0.030445	0.0443676
IRIS_313-11746	H0	H0	H0	H0	H0	H0	0.0388889	-3.20738	China	EAS	ind1A	ind1A	-0.038445	0.047021	0.056977	0.0393774	-0.0594121
IRIS_313-11747	H0	H0	H54	H18	H15	H28	0.00740741	-4.89784	China	EAS	indx	indx	-0.0292861	0.0370706	0.00380294	0.0212481	-0.0637628
IRIS_313-11748	H0	H16	H54	H18	H15	H28	0.0648148	-2.66921	China	EAS	indx	ind3B-2	-0.0141314	-0.0107755	0.00575847	-0.0418266	0.163712
IRIS_313-11752	H0	H0	H0	H0	H0	H0	0.151852	-1.72015	China	EAS	ind1A	ind1A	-0.0391576	0.056866	0.0496817	0.0432431	-0.0725184
IRIS_313-11753	H0	H0	H0	H0	H0	H0	0.0388889	-3.20738	China	EAS	ind1A	ind1A	-0.0320001	0.0669365	0.025653	0.0418945	-0.00726279
IRIS_313-11763	H0	H0	H0	H0	H0	H0	0.0111111	-4.48864	Cameroon	WAF	indx	indx	-0.0210864	0.00789467	-0.0482155	-0.134494	-0.0836805
IRIS_313-11764	H0	H0	H0	H0	H0	H0	0.0222222	-3.78419	Liberia	WAF	ind3	indx	-0.00791947	-0.0526133	-0.00163893	-0.0125834	0.0236062
IRIS_313-11786	H0	H0	H0	H0	H0	H0	0	NA	Gambia	WAF	ind3	ind3B-1	-0.016797	-0.0669624	0.0352494	-0.00599581	0.0233319
IRIS_313-11795	H0	H0	H0	H0	H0	H0	0.0166667	-4.07754	China	EAS	ind1A	ind1A	-0.0404203	0.0723185	0.0106182	-0.00226851	-0.0194109
IRIS_313-11796	H2	H0	H0	H0	H15	H28	0.331481	-0.701492	China	EAS	ind1A	ind1A	-0.0331894	0.066947	0.000942376	-0.000483362	0.0215001
IRIS_313-11797	H0	H0	H0	H0	H0	H0	0.164815	-1.62283	China	EAS	ind1A	ind1A	-0.0277107	0.0433495	0.00857179	0.0541893	-0.05649
IRIS_313-11798	H0	H0	H0	H0	H0	H0	0	NA	China	EAS	ind1B	indx	-0.00753052	-0.0530429	-0.0362378	-0.0991295	-0.105344
IRIS_313-11799	H0	H0	H0	H0	H0	H0	0.0555556	-2.83321	China	EAS	ind1A	ind1A	-0.0443154	0.081439	0.021646	0.0435375	-0.0199947
IRIS_313-11802	H2	H16	H54	H18	H15	H28	0.211111	-1.31824	China	EAS	ind1A	ind1A	-0.0327652	0.0588634	0.0114309	0.0272945	0.0154102
IRIS_313-11805	H0	H0	H0	H0	H0	H0	0.148148	-1.7492	China	EAS	ind1A	ind1A	-0.0377005	0.0614101	0.0205586	0.0379846	0.021418
IRIS_313-11806	H0	H0	H0	H0	H0	H0	0.0388889	-3.20738	China	EAS	ind1A	ind1A	-0.0392119	0.0852459	0.0167936	-0.015959	-0.0265668
IRIS_313-11807	H0	H0	H0	H0	H0	H0	0	NA	Colombia	SAM	indx	indx	-0.00506132	-0.00157929	-0.0772426	-0.117225	-0.091528
IRIS_313-11816	H0	H0	H0	H0	H0	H0	0.0222222	-3.78419	Myanmar	SEA	indx	indx	-0.00282821	-0.0273358	-0.0091646	0.0149072	0.0408651
IRIS_313-11818	H2	H16	H54	H18	H15	H0	0.0222222	-3.78419	Myanmar	SEA	indx	indx	0.00568391	-0.0286581	-0.0145208	0.0115609	0.0413431
IRIS_313-11820	H0	H0	H0	H0	H0	H0	0.0148148	-4.1972	Myanmar	SEA	ind3	ind3B-1	-0.00855722	-0.0876827	0.0753613	-0.00947092	-0.0219982
IRIS_313-11828	H0	H0	H54	H18	H15	H28	0.101852	-2.17682	India	SAC	ind2	ind2B	0.00971355	-0.0385063	-0.0833784	0.0720452	-0.0124928
IRIS_313-11835	H0	H0	H54	H18	H15	H28	0	NA	Thailand	SEA	indx	ind3B-1	-0.0228728	-0.0238755	0.0300655	-0.0062069	0.00843728
IRIS_313-11841	H0	H0	H54	H18	H15	H28	0.00555556	-5.18739	Thailand	SEA	ind3	ind3B-1	-0.0153816	-0.0907731	0.0902896	0.00208086	-0.039299
IRIS_313-11853	H0	H0	H0	H0	H0	H0	0.0314815	-3.42637	China	EAS	ind1A	ind1A	-0.0215547	0.0365589	-0.00418243	-0.0086789	0.0644933
IRIS_313-11854	H0	H0	H0	H0	H0	H0	0.0796296	-2.44739	China	EAS	ind1A	ind1A	-0.0307741	0.0401228	-0.00114996	-0.00974735	0.0234169
IRIS_313-11855	H0	H0	H0	H0	H15	H28	0.0481481	-2.98413	China	EAS	ind1A	ind1A	-0.0247797	0.0477586	-0.00177482	-0.0450185	0.0548464
IRIS_313-11856	H0	H0	H0	H0	H0	H0	0.0166667	-4.07754	China	EAS	ind1A	ind1A	-0.0250431	0.0413643	0.00347679	-0.0264187	0.0566041
IRIS_313-11857	H0	H0	H0	H0	H0	H0	0.127778	-1.92075	China	EAS	ind1A	ind1A	-0.0305589	0.0555116	0.00934471	-0.00165706	0.027487
IRIS_313-11858	H0	H0	H0	H0	H0	H0	0.0777778	-2.47293	China	EAS	ind1A	ind1A	-0.0370228	0.0541931	0.00594131	0.0187911	0.0225444
IRIS_313-11859	H0	H0	H0	H0	H0	H0	0.0648148	-2.66921	China	EAS	ind1A	ind1A	-0.0367103	0.0716644	0.0124716	0.0414226	0.0255234
IRIS_313-11860	H0	H0	H0	H0	H0	H0	0.0240741	-3.70225	China	EAS	ind1A	ind1A	-0.0370094	0.0639175	0.00956801	-0.00583208	0.00340414
IRIS_313-11862	H0	H0	H0	H0	H0	H0	0.0759259	-2.49903	China	EAS	ind1A	ind1A	-0.0344696	0.0705348	0.014703	0.0173731	0.019012
IRIS_313-11866	H0	H0	H0	H0	H0	H0	0.0351852	-3.31131	China	EAS	ind1A	ind1A	-0.0407661	0.0843796	0.0143462	-0.0188526	-0.0260344
IRIS_313-11867	H0	H0	H0	H0	H0	H0	0.0481481	-2.98413	China	EAS	ind1A	ind1A	-0.0287413	0.0454646	-5.49795e-05	-0.0096801	0.0456496
IRIS_313-11869	H0	H0	H0	H0	H0	H0	0.0388889	-3.20738	China	EAS	ind1A	ind1A	-0.0362431	0.0657199	0.0044628	-0.0467043	0.0221556
IRIS_313-11876	H0	H0	H0	H0	H0	H0	0.00555556	-5.18739	China	EAS	ind1A	indx	0.00134136	0.0359276	-0.0215365	-0.0465976	0.106625
IRIS_313-11877	H0	H0	H0	H0	H0	H0	0.0944444	-2.26054	China	EAS	ind1A	ind1A	-0.0418752	0.0817814	0.0227022	0.0686234	0.00716984
IRIS_313-11878	H0	H0	H0	H0	H0	H0	0	NA	China	EAS	ind1A	ind1A	-0.0266634	0.0555105	0.00274831	0.00870468	0.0563976
IRIS_313-11881	H2	H16	H54	H18	H15	H0	0.164815	-1.62283	China	EAS	ind1A	ind1A	-0.0340411	0.0792791	0.0173961	0.0479347	0.0333616
IRIS_313-11882	H0	H0	H0	H0	H0	H0	0.15	-1.7346	China	EAS	ind1A	ind1A	-0.0355205	0.0758145	0.0134877	0.0208471	0.0179137
IRIS_313-11884	H0	H0	H0	H0	H0	H0	0.164815	-1.62283	China	EAS	ind1A	ind1A	-0.0407904	0.0846168	0.0264534	0.0647838	0.0100168
IRIS_313-11885	H0	H0	H0	H0	H0	H0	0.168519	-1.59616	China	EAS	ind1A	ind1A	-0.0399031	0.0846208	0.0229266	0.0836567	0.00399328
IRIS_313-11893	H0	H0	H0	H0	H0	H0	0.00555556	-5.18739	Viet Nam	SEA	indx	indx	-0.00484801	-0.0232278	0.00606194	-0.0438258	0.10135
IRIS_313-11899	H2	H16	H54	H18	H15	H0	0	NA	Thailand	SEA	indx	indx	-0.00212898	-0.0505885	0.0092935	0.00575072	0.0348028
IRIS_313-11910	H2	H16	H54	H18	H15	H28	0.140741	-1.80915	China	EAS	indx	ind3B-2	-0.00891436	-0.0142807	-0.0168426	-0.0408004	0.144993
IRIS_313-11911	H2	H16	H54	H18	H15	H28	0.231481	-1.19996	China	EAS	ind1A	ind1A	-0.0262519	0.0456842	-5.74789e-05	0.0192181	0.0139821
IRIS_313-11916	H2	H16	H54	H18	H15	H28	0.0481481	-2.98413	Sri Lanka	IOC	ind2	indx	0.0248621	-0.0248291	-0.0816185	0.0605962	0.00185711
IRIS_313-11920	H0	H0	H0	H0	H0	H0	0.0111111	-4.48864	Thailand	SEA	indx	ind2A	-0.0033127	-0.0536116	-0.0151004	0.0115716	0.0105153
IRIS_313-11927	H0	H0	H54	H18	H15	H28	0	NA	Thailand	SEA	ind3	ind3B-1	-0.0143991	-0.0973346	0.121711	0.0144525	-0.042726
IRIS_313-11939	H0	H0	H0	H0	H0	H0	0.00925926	-4.67283	Burkina Faso	WAF	ind3	ind3B-1	-0.0131875	-0.0662173	0.0397987	0.0111146	0.00714427
IRIS_313-11943	H0	H0	H0	H0	H0	H0	0.144444	-1.77886	Nepal	SAC	ind1A	ind1A	-0.0390425	0.0708451	0.0186908	0.0406517	-0.00823702
IRIS_313-11944	H0	H0	H0	H0	H0	H0	0.240741	-1.14862	Nepal	SAC	ind1A	ind1A	-0.0403051	0.0756786	0.0161259	0.046484	-0.00792226
IRIS_313-11948	H0	H0	H0	H0	H0	H0	0.0407407	-3.15893	China	EAS	ind1A	ind1A	-0.0282399	0.0571103	0.0217748	0.0242697	0.0270682
IRIS_313-11949	H0	H0	H0	H0	H0	H0	0.0592593	-2.76475	China	EAS	ind1A	ind1A	-0.039272	0.0845205	0.032502	0.0874744	0.000665176
IRIS_313-11950	H0	H0	H0	H0	H0	H0	0.0166667	-4.07754	China	EAS	ind1A	ind1A	-0.0292341	0.0425418	-0.00110811	0.0181674	0.0555597
IRIS_313-11951	H0	H0	H0	H0	H0	H0	0.0351852	-3.31131	China	EAS	ind1A	ind1A	-0.0323995	0.0592598	0.00522289	0.0108845	0.036136
IRIS_313-11953	H2	H16	H54	H18	H15	H28	0.17963	-1.51886	China	EAS	ind1A	ind1A	-0.0210314	0.0506472	0.00840527	-0.0402178	0.0738463
IRIS_313-11955	H0	H0	H0	H0	H0	H0	0.0166667	-4.07754	China	EAS	ind1A	ind1A	-0.0286494	0.0448885	0.0101579	-0.0512499	0.0514804
IRIS_313-11957	H0	H0	H54	H18	H15	H28	0.0240741	-3.70225	Thailand	SEA	indx	indx	-0.00982318	-0.022101	0.0283075	0.0387374	-0.0145584
IRIS_313-11961	H0	H0	H54	H18	H15	H0	0.00555556	-5.18739	Thailand	SEA	ind3	ind3B-1	-0.0153849	-0.0949127	0.11742	0.0126717	-0.043599
IRIS_313-11963	H2	H16	H54	H18	H15	H28	0.157407	-1.67765	India	SAC	aus	aus2	0.216752	0.0539436	0.0502918	0.00541983	-0.0122252
IRIS_313-11965	H0	H0	H0	H0	H0	H0	0.15	-1.7346	China	EAS	ind1A	ind1A	-0.0433265	0.0906207	0.0158977	-0.00818451	-0.0402269
IRIS_313-11966	H2	H16	H54	H18	H15	H28	0.318519	-0.760588	China	EAS	ind1A	ind1A	-0.0322155	0.0465718	0.0105287	0.0205096	0.0399399
IRIS_313-11968	H0	H0	H0	H0	H0	H0	0.0388889	-3.20738	China	EAS	ind1A	ind1A	-0.0454217	0.0842746	0.0274059	0.0176874	-0.0693791
IRIS_313-11980	H0	H0	H0	H0	H0	H0	0.1	-2.19722	Taiwan	EAR	ind1A	ind1A	-0.0366642	0.0689596	-0.00143919	-0.0914199	-0.00205889
IRIS_313-11986	H0	H0	H0	H0	H0	H0	0.0777778	-2.47293	China	EAS	ind1A	ind1A	-0.0442351	0.0892617	0.0348745	0.0390347	-0.0688771
IRIS_313-11991	H0	H0	H0	H0	H0	H0	0.00925926	-4.67283	Lao People's Democratic Republic	SEA	ind3	ind3B-1	-0.0100862	-0.0685402	0.0408558	0.00140137	0.02027
IRIS_313-12010	H2	H16	H54	H18	H15	H28	0.316667	-0.769133	China	EAS	ind1A	ind1A	-0.0361214	0.0646645	0.0107014	0.00686554	0.021302
IRIS_313-12012	H0	H0	H0	H0	H0	H0	0.144444	-1.77886	China	EAS	ind1A	ind1A	-0.0311539	0.0519903	0.0160163	-0.00159583	0.0128387
IRIS_313-12015	H2	H16	H54	H18	H15	H28	0.0037037	-5.59471	Nigeria	WAF	ind2	ind2A	0.0206009	-0.0419993	-0.0690999	0.051102	-0.00911076
IRIS_313-12033	H2	H16	H54	H18	H15	H28	0.185185	-1.4816	China	EAS	ind1A	ind1A	-0.0320425	0.0568188	0.00381819	-0.0289515	0.0299956
IRIS_313-12057	H2	H16	H54	H18	H15	H28	0.303704	-0.829723	China	EAS	indx	ind3B-2	-0.00689185	0.00742044	0.00484775	-0.0604321	0.161384
IRIS_313-12130	H0	H0	H54	H18	H15	H28	0	NA	Lao People's Democratic Republic	SEA	ind3	ind3B-1	-0.0170119	-0.0821946	0.101856	0.0242515	-0.0412989
IRIS_313-12133	H0	H0	H54	H18	H15	H28	0.0166667	-4.07754	Lao People's Democratic Republic	SEA	ind3	ind3B-1	-0.0170082	-0.0755566	0.0920097	0.0147564	-0.0425286
IRIS_313-12161	H0	H0	H54	H18	H0	H0	0	NA	Cambodia	SEA	ind3	ind3B-1	-0.0063351	-0.067073	0.0281248	-0.029649	0.0312723
IRIS_313-12207	H0	H0	H54	H18	H15	H28	0.277778	-0.955511	Lao People's Democratic Republic	SEA	indx	indx	-0.0150783	-0.0190791	0.0211292	0.0370962	-0.00997672
IRIS_313-12210	H2	H16	H54	H18	H15	H28	0.0222222	-3.78419	Viet Nam	SEA	indx	ind3B-2	-0.0103582	-0.0343824	0.00834256	-0.0247501	0.0762933
IRIS_313-12224	H0	H0	H54	H18	H15	H28	0.0111111	-4.48864	Lao People's Democratic Republic	SEA	ind3	ind3B-1	-0.0170668	-0.0978195	0.128631	0.0254319	-0.0561085
IRIS_313-12231	H0	H0	H54	H18	H15	H0	0	NA	Lao People's Democratic Republic	SEA	ind3	ind3B-1	-0.0148591	-0.0969653	0.114288	0.0154591	-0.0466262
IRIS_313-12232	H0	H0	H0	H0	H0	H0	0.0444444	-3.06805	China	EAS	indx	indx	-0.0209741	0.0258921	-0.0231475	-0.102783	-0.0410524
IRIS_313-12237	H0	H0	H0	H0	H0	H0	0.12963	-1.90424	China	EAS	ind1A	ind1A	-0.0324917	0.0588122	0.00633602	0.0151945	0.014195
IRIS_313-12249	H0	H0	H0	H0	H0	H0	0	NA	Cambodia	SEA	ind3	ind3B-1	-0.00325513	-0.066606	0.0368024	0.00134839	0.0128027
IRIS_313-12259	H0	H0	H54	H18	H15	H0	0	NA	Lao People's Democratic Republic	SEA	ind3	ind3B-1	-0.0171141	-0.0835493	0.0991379	0.0043123	-0.0274226
IRIS_313-12260	H0	H0	H54	H18	H15	H0	0.00555556	-5.18739	Lao People's Democratic Republic	SEA	ind3	ind3B-1	-0.0152061	-0.0961854	0.124505	0.0212203	-0.054022
IRIS_313-12263	H0	H0	H54	H18	H15	H0	0.0185185	-3.97029	Lao People's Democratic Republic	SEA	ind3	ind3B-1	-0.0168253	-0.080947	0.0971155	0.012564	-0.0405151
IRIS_313-12268	H0	H0	H54	H18	H15	H28	0.062963	-2.70018	Myanmar	SEA	indx	indx	-0.0153617	-0.0427725	0.0243653	0.0449383	-0.00800485
IRIS_313-12269	H2	H16	H54	H18	H15	H0	0.00555556	-5.18739	Myanmar	SEA	indx	indx	-0.000679277	-0.0541168	-0.0176563	-0.0194574	0.0305129
IRIS_313-12270	H0	H0	H54	H18	H15	H28	0.0166667	-4.07754	Myanmar	SEA	indx	indx	-0.0105145	-0.0482874	0.0186283	0.038307	-0.0113062
IRIS_313-12273	H0	H0	H0	H0	H0	H0	0.0518519	-2.90612	China	EAS	ind1A	ind1A	-0.0328121	0.0552956	0.0182089	0.0182446	-0.0322371
IRIS_313-12297	H2	H16	H54	H18	H15	H0	0.0703704	-2.58101	Lao People's Democratic Republic	SEA	indx	indx	-0.00743628	-0.0252991	-0.013891	0.0125573	0.0276784
IRIS_313-12300	H2	H16	H54	H18	H15	H28	0.17963	-1.51886	Lao People's Democratic Republic	SEA	indx	indx	-0.0153014	-0.0251294	0.01572	0.0202138	0.0180551
IRIS_313-12302	H0	H0	H54	H18	H15	H28	0.00555556	-5.18739	Lao People's Democratic Republic	SEA	ind3	ind3B-1	-0.015713	-0.068379	0.0822595	0.0331355	-0.0379504
IRIS_313-12303	H0	H0	H54	H18	H15	H28	0.00555556	-5.18739	Lao People's Democratic Republic	SEA	indx	indx	-0.0166651	-0.0571771	0.0534003	0.0428383	-0.0207136
IRIS_313-12355	H0	H0	H54	H18	H15	H28	0.00555556	-5.18739	Lao People's Democratic Republic	SEA	indx	indx	-0.0212829	-0.0344904	0.0348266	-0.0466427	-0.0582507
IRIS_313-15897	H0	H0	H0	H0	H0	H0	0	NA	China	EAS	indx	indx	-0.0156293	-0.00617998	-0.0229693	-0.0754509	-0.0530291
IRIS_313-7684	H0	H0	H0	H0	H0	H0	0.0388889	-3.20738	Philippines	SER-IRRI	indx	ind1B-1	-0.00234256	-0.00865241	-0.110299	-0.071006	-0.108466
IRIS_313-7685	H0	H0	H0	H0	H0	H0	0.0222222	-3.78419	Philippines	SER-IRRI	ind1B	ind1B-1	0.00295372	-0.0256333	-0.108526	-0.0748024	-0.100132
IRIS_313-7690	H0	H0	H0	H0	H0	H0	0.0518519	-2.90612	Philippines	SER-IRRI	indx	indx	0.00530922	-0.00709351	-0.0784834	0.00415143	-0.0360807
IRIS_313-7770	H0	H0	H0	H0	H0	H0	0.00925926	-4.67283	Mali	WAF	ind1B	indx	-0.0198438	0.00753628	-0.0565005	-0.124338	-0.088667
IRIS_313-7778	H0	H0	H0	H0	H0	H0	0.00555556	-5.18739	Viet Nam	SEA	indx	ind3B-2	-0.016007	-0.028748	-0.0012363	-0.0297185	0.113302
IRIS_313-7824	H0	H0	H0	H0	H0	H0	0.087037	-2.35036	Senegal	WAF	ind1B	ind1B-1	0.000233489	-0.0171795	-0.0807597	-0.0813696	-0.102282
IRIS_313-7826	H0	H0	H0	H0	H0	H0	0.0907407	-2.30462	Senegal	WAF	ind1B	ind1B-1	-0.00975888	-0.0198349	-0.0727279	-0.11131	-0.0979634
IRIS_313-8215	H0	H0	H0	H0	H0	H0	0.0333333	-3.3673	France	EUR	indx	indx	-0.0224244	0.0263166	-0.0156855	-0.0509204	-0.0764116
IRIS_313-8244	H2	H16	H54	H18	H15	H0	0.00555556	-5.18739	Sri Lanka	IOC	ind2	ind2B	0.0142386	-0.0307264	-0.132145	0.0968522	0.00754076
IRIS_313-8265	H0	H0	H0	H0	H0	H0	0.0333333	-3.3673	India	SAC	indx	indx	0.00147854	-0.00685064	-0.0998013	0.0194576	-0.0572196
IRIS_313-8332	H2	H16	H54	H18	H15	H28	0.0166667	-4.07754	India	SAC	indx	indx	-0.00795883	-0.0325683	0.0268871	0.0313603	-0.014433
IRIS_313-8341	H2	H16	H54	H18	H15	H28	0.122222	-1.97155	Viet Nam	SEA	indx	ind3B-2	-0.0152567	-0.0213465	-0.00924449	-0.0206176	0.116713
IRIS_313-8380	H0	H0	H0	H0	H0	H0	0.0351852	-3.31131	China	EAS	ind1A	ind1A	-0.0307403	0.0425074	0.00675727	0.0225654	0.0254468
IRIS_313-8398	H2	H16	H54	H18	H15	H0	0.203704	-1.3633	Pakistan	SAW	aus	aus2	0.224459	0.0546067	0.0533922	-0.0103715	0.00317517
IRIS_313-8433	H0	H0	H0	H0	H0	H0	0.0444444	-3.06805	China	EAS	ind1A	ind1A	-0.0447033	0.081464	0.0181697	-0.00487497	-0.0521888
IRIS_313-8453	H2	H16	H54	H18	H15	H0	0.0611111	-2.732	India	SAC	indx	indx	-0.00850136	-0.0364939	-0.00243526	0.0251783	0.00360252
IRIS_313-8454	H0	H0	H0	H0	H0	H0	0.0333333	-3.3673	Taiwan	EAR	ind1A	ind1A	-0.0404616	0.0670252	0.0277639	0.0519218	-0.010398
IRIS_313-8571	H0	H0	H0	H0	H0	H0	0	NA	Tanzania	EAF	ind3	ind3B-1	-0.00712806	-0.0875966	0.075264	-0.0103341	-0.0213196
IRIS_313-8585	H0	H0	H54	H18	H15	H28	0.0314815	-3.42637	India	SAC	indx	indx	-0.0130337	-0.0433503	0.0228698	0.0481815	-0.00422785
IRIS_313-8586	H0	H0	H54	H18	H15	H28	0	NA	Thailand	SEA	ind3	ind3B-1	-0.0162357	-0.0935955	0.110383	0.0130087	-0.0336175
IRIS_313-8622	H2	H16	H54	H18	H15	H28	0.0277778	-3.55535	India	SAC	ind2	ind2B	0.0319548	-0.0200883	-0.0994689	0.0696453	0.00428024
IRIS_313-8638	H0	H0	H54	H18	H15	H0	0	NA	Lao People's Democratic Republic	SEA	ind3	ind3B-1	-0.0181018	-0.0844883	0.110905	0.0265943	-0.0479895
IRIS_313-8645	H0	H0	H0	H0	H0	H0	0.0203704	-3.87309	China	EAS	ind1A	ind1A	-0.036164	0.0707244	0.0225179	0.0696269	0.0270483
IRIS_313-8647	H2	H16	H54	H18	H15	H0	0.0351852	-3.31131	India	SAC	ind2	ind2B	0.0155174	-0.0217939	-0.126364	0.0809905	-0.0192473
IRIS_313-8697	H0	H0	H0	H0	H0	H0	0.0148148	-4.1972	Myanmar	SEA	ind3	ind3B-1	-0.0102266	-0.0674506	0.0375852	-0.00173458	0.0153476
IRIS_313-8717	H2	H16	H54	H18	H15	H0	0.00555556	-5.18739	Bangladesh	SAE	indx	ind2A	0.0117028	-0.045342	-0.0396884	0.0257588	0.0101553
IRIS_313-8727	H2	H16	H54	H18	H15	H28	0.0703704	-2.58101	India	SAC	ind2	ind2B	0.0122219	-0.0259427	-0.105473	0.0802582	0.0134288
IRIS_313-8833	H2	H16	H54	H18	H15	H0	0.00555556	-5.18739	Indonesia	SER	ind3	ind3A	-0.00222509	-0.0574478	0.00794502	-0.0553006	0.0178458
IRIS_313-8925	H2	H16	H54	H18	H15	H28	0	NA	Sri Lanka	IOC	ind2	ind2B	0.0124923	-0.0277457	-0.108066	0.0835045	-0.00944991
IRIS_313-8932	H0	H0	H0	H0	H0	H0	0.0203704	-3.87309	Bangladesh	SAE	ind3	ind3A	-0.00410647	-0.0422155	-0.00615205	-0.0747493	0.047092
IRIS_313-8940	H0	H0	H0	H0	H0	H0	0.0462963	-3.02529	China	EAS	ind1A	ind1A	-0.0433654	0.0783145	0.0171191	0.00927651	-0.0464828
IRIS_313-8968	H2	H16	H54	H18	H15	H28	0.0166667	-4.07754	Sri Lanka	IOC	ind2	ind2B	0.0165513	-0.0271761	-0.131851	0.102267	-0.00370102
IRIS_313-8982	H2	H16	H54	H18	H15	H28	0.0388889	-3.20738	India	SAC	indx	indx	0.0214251	-0.01012	-0.00985727	0.038562	0.0103751
IRIS_313-8985	H0	H0	H54	H18	H0	H0	0	NA	Thailand	SEA	ind3	ind3B-1	-0.00750902	-0.0656693	0.02347	-0.0275537	0.029273
IRIS_313-8986	H2	H16	H54	H18	H15	H28	0.0648148	-2.66921	India	SAC	indx	indx	0.0414497	-0.00336034	-0.00316051	0.0375691	0.00961323
IRIS_313-8988	H0	H0	H54	H18	H15	H28	0	NA	India	SAC	ind2	ind2B	0.00778915	-0.0356831	-0.0861769	0.0665584	-0.0162661
IRIS_313-8996	H0	H0	H0	H0	H0	H0	0	NA	Viet Nam	SEA	ind3	ind3B-1	-0.0102125	-0.0685644	0.0353464	-0.0049856	0.0214774
IRIS_313-9006	H0	H0	H54	H18	H15	H28	0	NA	Thailand	SEA	ind3	ind3B-1	-0.0176917	-0.0860817	0.106117	0.017324	-0.0511401
IRIS_313-9019	H0	H0	H54	H18	H15	H28	0	NA	Thailand	SEA	ind3	ind3B-1	-0.015795	-0.0906415	0.0898629	0.00306093	-0.0361079
IRIS_313-9020	H0	H0	H54	H18	H0	H0	0.0203704	-3.87309	Thailand	SEA	ind3	ind3B-1	-0.00634461	-0.0719396	0.0350021	-0.0160146	0.022552
IRIS_313-9039	H2	H16	H54	H18	H15	H28	0.0166667	-4.07754	Sri Lanka	IOC	ind2	ind2B	0.0125469	-0.0347223	-0.113936	0.0838642	-0.00677712
IRIS_313-9062	H0	H0	H54	H18	H15	H0	0	NA	Thailand	SEA	ind3	ind3B-1	-0.0147814	-0.0898108	0.109041	0.0213806	-0.0457632
IRIS_313-9065	H0	H0	H0	H0	H0	H0	0.0481481	-2.98413	China	EAS	ind1A	ind1A	-0.0416918	0.091622	0.0113848	-0.0060417	-0.0356359
IRIS_313-9067	H2	H16	H54	H18	H15	H28	0.00555556	-5.18739	Bangladesh	SAE	ind2	ind2A	0.0175722	-0.0456348	-0.0394366	0.0115274	0.0154056
IRIS_313-9148	H0	H0	H54	H18	H15	H28	0	NA	Bangladesh	SAE	ind2	indx	0.0277063	-0.0264216	-0.0555969	0.0493869	0.00299783
IRIS_313-9182	H2	H16	H54	H18	H15	H28	0.0611111	-2.732	Myanmar	SEA	indx	indx	-0.0028174	-0.048461	0.0179407	0.00201001	0.0300844
IRIS_313-9184	H2	H16	H54	H18	H15	H0	0.185185	-1.4816	China	EAS	indx	ind3B-2	-0.0108269	-0.0114131	-0.00945196	-0.0608902	0.172304
IRIS_313-9204	H0	H0	H0	H0	H0	H0	0.0425926	-3.11255	China	EAS	ind1A	ind1A	-0.0286955	0.0554913	0.0122672	0.0149869	0.0439094
IRIS_313-9253	H0	H0	H0	H0	H0	H0	0.0166667	-4.07754	China	EAS	ind1A	ind1A	-0.0340068	0.089347	0.0217293	-0.0181711	-0.0613392
IRIS_313-9262	H0	H0	H0	H0	H0	H0	0	NA	Bangladesh	SAE	ind2	ind2A	0.0062472	-0.0512353	-0.0444723	0.0255253	-0.00538311
IRIS_313-9313	H2	H16	H54	H18	H15	H28	0.181481	-1.50634	India	SAC	indx	indx	0.0477205	-0.00305807	-0.00619426	0.0436188	0.0155193
IRIS_313-9324	H0	H0	H0	H0	H0	H0	0.0111111	-4.48864	China	EAS	ind1A	ind1A	-0.0319393	0.0487269	-0.00657186	0.0138685	0.0128257
IRIS_313-9372	H0	H0	H0	H0	H0	H0	0.00925926	-4.67283	China	EAS	ind1A	ind1A	-0.0326453	0.0501487	0.000335599	0.0299396	-0.0169478
IRIS_313-9391	H2	H16	H54	H18	H15	H28	0.0259259	-3.62624	Bangladesh	SAE	ind2	ind2A	-0.00424255	-0.0546865	-0.0457472	0.014936	0.0109635
IRIS_313-9424	H2	H16	H54	H18	H15	H28	0.0351852	-3.31131	India	SAC	indx	indx	-0.00921299	-0.0382355	-0.00921402	0.0287013	-0.0251749
IRIS_313-9429	H0	H0	H0	H0	H0	H0	0.0333333	-3.3673	Viet Nam	SEA	indx	ind3B-2	-0.0141123	-0.015051	-0.0121648	-0.021943	0.0965783
IRIS_313-9451	H0	H0	H54	H18	H0	H0	0.0037037	-5.59471	Thailand	SEA	indx	indx	-0.0186297	-0.0222215	0.031472	0.014409	0.0152534
IRIS_313-9469	H0	H0	H0	H0	H0	H0	0	NA	China	EAS	ind1A	ind1A	-0.0382081	0.0639896	0.0169802	0.029156	0.0199143
IRIS_313-9505	H0	H0	H0	H0	H0	H0	0	NA	Philippines	SER	ind1A	ind1A	-0.0358361	0.075159	0.00883738	0.0434666	0.0107789
IRIS_313-9555	H2	H16	H54	H18	H15	H28	0.062963	-2.70018	China	EAS	indx	ind3B-2	-0.0132205	-0.0265446	-0.00239912	-0.0301846	0.135629
IRIS_313-9560	H0	H0	H54	H18	H15	H28	0.0166667	-4.07754	India	SAC	indx	indx	-0.0107156	-0.0426331	0.00966155	0.0373442	-0.0152275
IRIS_313-9570	H0	H0	H0	H0	H0	H0	0.00555556	-5.18739	China	EAS	indx	indx	-0.0139562	0.018835	-0.00466749	-0.0610626	-0.0630786
IRIS_313-9594	H0	H0	H0	H0	H0	H0	0.00555556	-5.18739	Bangladesh	SAE	indx	ind2A	-0.0032217	-0.0615087	-0.0248007	0.0061554	0.017776
IRIS_313-9604	H0	H0	H0	H0	H0	H0	0.0592593	-2.76475	India	SAC	indx	indx	0.00124758	0.0158141	-0.0678942	-0.0391141	-0.0433363
IRIS_313-9609	H2	H16	H54	H18	H15	H0	0.0111111	-4.48864	India	SAC	indx	indx	-0.00738375	-0.0138537	0.00459907	0.0430092	0.0157543
IRIS_313-9617	H2	H16	H54	H18	H15	H0	0.0203704	-3.87309	Bangladesh	SAE	ind2	indx	0.0106617	-0.052631	-0.0499464	0.0357792	0.00403935
IRIS_313-9696	H0	H16	H54	H18	H15	H0	0.0111111	-4.48864	Bangladesh	SAE	indx	indx	-0.00143911	-0.0547216	-0.061921	-0.0712207	-0.0423494
IRIS_313-9705	H0	H0	H0	H0	H0	H0	0.0185185	-3.97029	Taiwan	EAR	ind1A	ind1A	-0.0376682	0.0621069	0.00198531	-0.0632241	-6.43902e-05
IRIS_313-9706	H0	H0	H0	H0	H0	H0	0.0277778	-3.55535	Taiwan	EAR	ind1A	ind1A	-0.0323341	0.058446	-0.00388102	-0.0613686	0.00549747
IRIS_313-9723	H2	H16	H54	H18	H15	H0	0.346296	-0.635359	China	EAS	ind1A	ind1A	-0.0320332	0.0671871	0.0096343	0.00421585	0.0191924
IRIS_313-9727	H0	H0	H0	H0	H0	H0	0.0444444	-3.06805	China	EAS	ind1A	ind1A	0.0322308	0.0721012	0.0228206	0.0314908	-0.0708478
IRIS_313-9730	H0	H0	H0	H0	H0	H0	0.012963	-4.33261	China	EAS	ind1A	ind1A	-0.0396156	0.085762	0.025373	0.0820005	-0.00709983
IRIS_313-9758	H0	H0	H0	H0	H0	H0	0.0555556	-2.83321	Taiwan	EAR	ind1A	ind1A	-0.0322966	0.0717969	0.00175781	-0.0829094	0.0127221
IRIS_313-9791	H0	H0	H0	H0	H0	H0	0.00555556	-5.18739	Malawi	EAF	indx	indx	-0.0101715	0.0120949	-0.0303693	-0.0222638	-0.00957461
IRIS_313-9831	H2	H16	H54	H18	H15	H0	0.0166667	-4.07754	Sri Lanka	IOC	indx	indx	0.00023197	-0.000862054	-0.0682732	0.0730643	-0.0149505
IRIS_313-9862	H2	H16	H54	H18	H15	H0	0.0166667	-4.07754	Sri Lanka	IOC	ind2	ind2B	0.0188219	-0.0243494	-0.103948	0.0795996	-0.0141419
IRIS_313-9917	H0	H0	H0	H0	H0	H0	0.0333333	-3.3673	Sri Lanka	IOC	ind1B	indx	0.00225233	-0.0399491	-0.0943281	-0.101176	-0.105986
IRIS_313-9922	H0	H0	H0	H0	H0	H0	0.00555556	-5.18739	Korea, Republic of	EAR	ind1B	ind1B-2	-0.0065483	-0.0134187	-0.0603995	-0.166448	-0.109852
IRIS_313-9924	H0	H0	H0	H0	H0	H0	0	NA	Korea, Republic of	EAR	indx	indx	-0.0179843	-0.00389265	-0.0402856	-0.126942	-0.0754519
IRIS_313-9944	H2	H16	H54	H18	H15	H28	0	NA	Solomon Islands	OCE	indx	indx	0.0135528	-0.0347814	-0.0918827	0.0716915	-0.00574384
IRIS_313-9968	H0	H0	H54	H18	H15	H28	0	NA	Sri Lanka	IOC	indx	indx	-0.025215	0.0151665	0.0439473	0.0506279	-0.056396
IRIS_313-9970	H2	H16	H54	H18	H15	H28	0.0222222	-3.78419	Sri Lanka	IOC	ind2	ind2B	0.0147145	-0.0277411	-0.150575	0.114786	-0.00838139
IRIS_313-9976	H0	H0	H0	H0	H0	H0	0.00555556	-5.18739	Korea, Republic of	EAR	ind1A	ind1A	-0.0382173	0.0702859	0.000540179	-0.0504576	-0.00181505

## Sheet: Sample_5groups
Sample	HaplotypeGroup
IRIS_313-11920	Grp5
IRIS_313-11383	Grp5
IRIS_313-10502	Grp5
IRIS_313-11893	Grp5
IRIS_313-11570	Grp5
IRIS_313-10371	Grp5
IRIS_313-10154	Grp5
IRIS_313-7826	Grp5
IRIS_313-12237	Grp5
IRIS_313-11622	Grp5
IRIS_313-11968	Grp5
IRIS_313-10359	Grp5
IRIS_313-10561	Grp5
IRIS_313-11885	Grp5
IRIS_313-10211	Grp5
IRIS_313-11944	Grp5
IRIS_313-11857	Grp5
IRIS_313-11949	Grp5
IRIS_313-11884	Grp5
IRIS_313-7690	Grp5
IRIS_313-10191	Grp5
IRIS_313-10054	Grp5
IRIS_313-9570	Grp5
IRIS_313-10268	Grp5
IRIS_313-9324	Grp5
IRIS_313-9372	Grp5
IRIS_313-10503	Grp5
IRIS_313-11745	Grp5
IRIS_313-11668	Grp5
IRIS_313-9917	Grp5
IRIS_313-11807	Grp5
IRIS_313-11665	Grp5
IRIS_313-11797	Grp5
IRIS_313-11656	Grp5
IRIS_313-11038	Grp5
IRIS_313-11752	Grp5
IRIS_313-11727	Grp5
IRIS_313-10171	Grp5
IRIS_313-11854	Grp5
IRIS_313-11798	Grp5
IRIS_313-11734	Grp5
IRIS_313-11685	Grp5
IRIS_313-11746	Grp5
IRIS_313-11664	Grp5
IRIS_313-10847	Grp5
IRIS_313-7824	Grp5
IRIS_313-11991	Grp5
IRIS_313-10932	Grp5
IRIS_313-11858	Grp5
IRIS_313-8940	Grp5
IRIS_313-11948	Grp5
IRIS_313-10450	Grp5
IRIS_313-11568	Grp5
IRIS_313-11546	Grp5
IRIS_313-11882	Grp5
IRIS_313-11624	Grp5
IRIS_313-11867	Grp5
IRIS_313-11877	Grp5
IRIS_313-10968	Grp5
IRIS_313-11859	Grp5
IRIS_313-7685	Grp5
IRIS_313-11943	Grp5
IRIS_313-11728	Grp5
IRIS_313-11548	Grp5
IRIS_313-11866	Grp5
IRIS_313-11799	Grp5
IRIS_313-11795	Grp5
IRIS_313-11950	Grp5
IRIS_313-11692	Grp5
IRIS_313-7770	Grp5
IRIS_313-11878	Grp5
IRIS_313-11753	Grp5
IRIS_313-11856	Grp5
IRIS_313-11853	Grp5
IRIS_313-11510	Grp5
IRIS_313-10190	Grp5
IRIS_313-11341	Grp5
IRIS_313-12012	Grp5
IRIS_313-8380	Grp5
IRIS_313-11862	Grp5
IRIS_313-9730	Grp5
IRIS_313-9706	Grp5
IRIS_313-9204	Grp5
IRIS_313-7684	Grp5
IRIS_313-11951	Grp5
IRIS_313-11860	Grp5
IRIS_313-9505	Grp5
IRIS_313-8645	Grp5
IRIS_313-11876	Grp5
IRIS_313-10504	Grp5
IRIS_313-9727	Grp5
IRIS_313-12273	Grp5
IRIS_313-10189	Grp5
IRIS_313-11805	Grp5
IRIS_313-8454	Grp5
IRIS_313-10449	Grp5
IRIS_313-11357	Grp5
IRIS_313-9469	Grp5
IRIS_313-11384	Grp5
IRIS_313-8215	Grp5
IRIS_313-8265	Grp5
IRIS_313-11695	Grp5
IRIS_313-8433	Grp5
IRIS_313-11288	Grp5
IRIS_313-9429	Grp5
IRIS_313-15897	Grp5
IRIS_313-11955	Grp5
IRIS_313-10560	Grp5
IRIS_313-11513	Grp5
IRIS_313-11338	Grp5
IRIS_313-11806	Grp5
IRIS_313-11039	Grp5
IRIS_313-11345	Grp5
IRIS_313-11740	Grp5
IRIS_313-11732	Grp5
IRIS_313-11309	Grp5
IRIS_313-10289	Grp5
IRIS_313-11980	Grp5
IRIS_313-11579	Grp5
IRIS_313-9758	Grp5
IRIS_313-9924	Grp5
IRIS_313-11869	Grp5
IRIS_313-11965	Grp5
IRIS_313-9976	Grp5
IRIS_313-10016	Grp5
IRIS_313-11157	Grp5
IRIS_313-10497	Grp5
IRIS_313-11152	Grp5
IRIS_313-10047	Grp5
IRIS_313-10754	Grp5
IRIS_313-9253	Grp5
IRIS_313-9065	Grp5
IRIS_313-11355	Grp5
IRIS_313-10515	Grp5
IRIS_313-11158	Grp5
IRIS_313-9705	Grp5
IRIS_313-11596	Grp5
IRIS_313-11433	Grp5
IRIS_313-9791	Grp5
IRIS_313-11986	Grp5
IRIS_313-11763	Grp5
IRIS_313-9922	Grp5
IRIS_313-9604	Grp5
IRIS_313-11735	Grp5
IRIS_313-11694	Grp5
IRIS_313-11744	Grp5
IRIS_313-11720	Grp5
IRIS_313-11528	Grp5
IRIS_313-11786	Grp5
IRIS_313-12232	Grp5
IRIS_313-11363	Grp5
IRIS_313-9262	Grp5
IRIS_313-8996	Grp5
IRIS_313-8932	Grp5
IRIS_313-11939	Grp5
IRIS_313-8697	Grp5
IRIS_313-11816	Grp5
IRIS_313-11730	Grp5
IRIS_313-11716	Grp5
IRIS_313-12249	Grp5
IRIS_313-10257	Grp5
IRIS_313-9594	Grp5
IRIS_313-11516	Grp5
IRIS_313-8571	Grp5
IRIS_313-11717	Grp5
IRIS_313-11263	Grp5
IRIS_313-11721	Grp5
IRIS_313-10271	Grp5
IRIS_313-11764	Grp5
IRIS_313-11677	Grp5
IRIS_313-11731	Grp5
IRIS_313-11493	Grp5
IRIS_313-11820	Grp5
IRIS_313-10762	Grp5
IRIS_313-7778	Grp5
IRIS_313-10314	Grp5
IRIS_313-11580	Grp5
IRIS_313-11796	Grp5
IRIS_313-11855	Grp5
IRIS_313-11835	Grp4
IRIS_313-10681	Grp4
IRIS_313-12268	Grp4
IRIS_313-11957	Grp4
IRIS_313-11700	Grp4
IRIS_313-11723	Grp4
IRIS_313-11667	Grp4
IRIS_313-12224	Grp4
IRIS_313-11645	Grp4
IRIS_313-11676	Grp4
IRIS_313-11719	Grp4
IRIS_313-11828	Grp4
IRIS_313-11446	Grp4
IRIS_313-10518	Grp4
IRIS_313-8988	Grp4
IRIS_313-12355	Grp4
IRIS_313-10666	Grp4
IRIS_313-9148	Grp4
IRIS_313-11927	Grp4
IRIS_313-11478	Grp4
IRIS_313-11747	Grp4
IRIS_313-9968	Grp4
IRIS_313-12303	Grp4
IRIS_313-12130	Grp4
IRIS_313-8585	Grp4
IRIS_313-9006	Grp4
IRIS_313-9560	Grp4
IRIS_313-11390	Grp4
IRIS_313-12270	Grp4
IRIS_313-10651	Grp4
IRIS_313-10007	Grp4
IRIS_313-12207	Grp4
IRIS_313-11841	Grp4
IRIS_313-11081	Grp4
IRIS_313-11443	Grp4
IRIS_313-12133	Grp4
IRIS_313-10168	Grp4
IRIS_313-8586	Grp4
IRIS_313-9019	Grp4
IRIS_313-11650	Grp3
IRIS_313-11403	Grp3
IRIS_313-10822	Grp3
IRIS_313-10942	Grp3
IRIS_313-9020	Grp3
IRIS_313-8985	Grp3
IRIS_313-12161	Grp3
IRIS_313-9451	Grp3
IRIS_313-12302	Grp3
IRIS_313-12263	Grp3
IRIS_313-12260	Grp3
IRIS_313-11961	Grp3
IRIS_313-11541	Grp3
IRIS_313-8638	Grp3
IRIS_313-9062	Grp3
IRIS_313-11641	Grp3
IRIS_313-12231	Grp3
IRIS_313-12259	Grp3
IRIS_313-10748	Grp2
IRIS_313-8398	Grp2
IRIS_313-10881	Grp2
IRIS_313-9184	Grp2
IRIS_313-10614	Grp2
IRIS_313-10674	Grp2
IRIS_313-10623	Grp2
IRIS_313-8717	Grp2
IRIS_313-10534	Grp2
IRIS_313-11018	Grp2
IRIS_313-10751	Grp2
IRIS_313-8647	Grp2
IRIS_313-9862	Grp2
IRIS_313-12269	Grp2
IRIS_313-9609	Grp2
IRIS_313-10239	Grp2
IRIS_313-8453	Grp2
IRIS_313-11899	Grp2
IRIS_313-9617	Grp2
IRIS_313-9831	Grp2
IRIS_313-11302	Grp2
IRIS_313-10675	Grp2
IRIS_313-11295	Grp2
IRIS_313-11818	Grp2
IRIS_313-11232	Grp2
IRIS_313-9723	Grp2
IRIS_313-11881	Grp2
IRIS_313-8244	Grp2
IRIS_313-10224	Grp2
IRIS_313-8833	Grp2
IRIS_313-12297	Grp2
IRIS_313-10917	Grp2
IRIS_313-9696	Grp2
IRIS_313-11076	Grp1
IRIS_313-10863	Grp1
IRIS_313-10221	Grp1
IRIS_313-11966	Grp1
IRIS_313-12300	Grp1
IRIS_313-8341	Grp1
IRIS_313-11015	Grp1
IRIS_313-9313	Grp1
IRIS_313-11916	Grp1
IRIS_313-11321	Grp1
IRIS_313-12210	Grp1
IRIS_313-11802	Grp1
IRIS_313-11050	Grp1
IRIS_313-9944	Grp1
IRIS_313-10835	Grp1
IRIS_313-9039	Grp1
IRIS_313-11113	Grp1
IRIS_313-11461	Grp1
IRIS_313-11607	Grp1
IRIS_313-11137	Grp1
IRIS_313-10715	Grp1
IRIS_313-9555	Grp1
IRIS_313-10458	Grp1
IRIS_313-11052	Grp1
IRIS_313-12033	Grp1
IRIS_313-8332	Grp1
IRIS_313-8925	Grp1
IRIS_313-9182	Grp1
IRIS_313-11640	Grp1
IRIS_313-11741	Grp1
IRIS_313-11056	Grp1
IRIS_313-11724	Grp1
IRIS_313-10380	Grp1
IRIS_313-11911	Grp1
IRIS_313-9424	Grp1
IRIS_313-11742	Grp1
IRIS_313-10671	Grp1
IRIS_313-11561	Grp1
IRIS_313-11458	Grp1
IRIS_313-10544	Grp1
IRIS_313-11275	Grp1
IRIS_313-11963	Grp1
IRIS_313-10857	Grp1
IRIS_313-8986	Grp1
IRIS_313-8982	Grp1
IRIS_313-11910	Grp1
IRIS_313-11055	Grp1
IRIS_313-11411	Grp1
IRIS_313-11557	Grp1
IRIS_313-10859	Grp1
IRIS_313-12010	Grp1
IRIS_313-12057	Grp1
IRIS_313-9067	Grp1
IRIS_313-11953	Grp1
IRIS_313-11463	Grp1
IRIS_313-11505	Grp1
IRIS_313-11347	Grp1
IRIS_313-11573	Grp1
IRIS_313-12015	Grp1
IRIS_313-8622	Grp1
IRIS_313-10716	Grp1
IRIS_313-11577	Grp1
IRIS_313-8968	Grp1
IRIS_313-10717	Grp1
IRIS_313-10673	Grp1
IRIS_313-9391	Grp1
IRIS_313-11317	Grp1
IRIS_313-11260	Grp1
IRIS_313-11748	Grp1
IRIS_313-10226	Grp1
IRIS_313-9970	Grp1
IRIS_313-11019	Grp1
IRIS_313-11399	Grp1
IRIS_313-11272	Grp1
IRIS_313-10977	Grp1
IRIS_313-10927	Grp1
IRIS_313-10452	Grp1
IRIS_313-10662	Grp1
IRIS_313-10476	Grp1
IRIS_313-8727	Grp1
IRIS_313-11115	Grp1
IRIS_313-10178	Grp1
