# Supplementary material for: Enriched-GWAS and Transcriptome Analysis to Refine and Characterize a Major QTL for Anaerobic Germination Tolerance in Rice
Source: Int J Mol Sci. 2021 Apr 24;22(9):4445. doi: 10.3390/ijms22094445 (PMC8123023; doi:10.3390/ijms22094445)
Supplement: Supplementary file 1 [file ijms-22-04445-s001.zip › Suppl_File9.xlsx]

## Sheet: RNASeq data_assembly
Supplementary File 9. Summary of RNA seq data and the sequence assembly
	IR42_1	IR42_2	IR42_3	IR42_4	IR64_1	IR64_2	IR64_3	IR64_4	Kharsu_1	Kharsu_2	Kharsu_3	Kharsu_4	KHO_1	KHO_2	KHO_3	KHO_4	MR-1	MR-2	MR-3	MR-4	Nanhi-1	Nanhi-2	Nanhi-3	Nanhi-4
Total reads	18245698	18468860	18354844	16226414	17622380	17870593	17026410	15712172	18831706	19480984	18263409	19778436	19233360	18783849	18477658	18968018	19647641	17559117	17721441	21241257	18239441	20651690	21835532	19130374
aligned concordantly 0 times	1475651	1536967	1458740	1420236	1447435	1521551	1486890	1302867	2420950	1787346	1858743	1896728	1782372	2172149	1581063	2247871	1733254	1572362	2096314	2018982	1978948	1662492	1757993	1556140
aligned concordantly exactly 1 time	13726420	13762564	13907986	12049251	13122727	13212239	12660110	11724572	6754293	13322999	11760803	13237192	14039161	9742466	13519700	10194701	14064489	12352845	9447593	14146677	10697625	15123154	16263293	14262174
aligned concordantly > 1 times	3043627	3169329	2988118	2756927	3052218	3136803	2879410	2684733	9656463	4370639	4643863	4644516	3411827	6869234	3376895	6525446	3849898	3633910	6177534	5075598	5562868	3866044	3814246	3312060
overall alignment	0.9501	0.9491	0.9525	0.9471	0.9495	0.9459	0.9447	0.9484	89.21%	0.9374	0.9297	0.9343	0.9412	0.9104	0.9451	0.9105	0.9442	94.10%	0.9086	0.9347	91.75%	0.9485	0.9492	94.94%
