# Supplementary material for: Enriched-GWAS and Transcriptome Analysis to Refine and Characterize a Major QTL for Anaerobic Germination Tolerance in Rice
Source: Int J Mol Sci. 2021 Apr 24;22(9):4445. doi: 10.3390/ijms22094445 (PMC8123023; doi:10.3390/ijms22094445)
Supplement: Supplementary file 1 [file ijms-22-04445-s001.zip › Suppl_File10.xlsx]

## Sheet: KHARSUvsIR42
Supplementary File 10. List of DEGs in pairwise comparison in each tolerant variety using each susceptible variety as reference
rap	MSU	baseMean	log2FoldChange	lfcSE	pvalue	padj	GO	GO category	function
ENSRNA049464904	None	11.8839	2.65856	0.969469	0.000613885	0.00579009	None	None	None
ENSRNA049465109	None	165.691	6.84788	0.980839	1.89e-13	8.61e-12	None	None	None
ENSRNA049465125	None	166.274	12.7323	3.13363	9.41e-24	1.26e-21	None	None	None
ENSRNA049465687	None	21.2395	5.82483	0.948846	4.01e-10	1.23e-08	None	None	None
ENSRNA049466338	None	345.479	6.82982	0.931233	1.16e-14	6.03e-13	None	None	None
ENSRNA049466512	None	6.57312	7.01021	2.8424	1.42e-05	0.000213486	None	None	None
ENSRNA049468369	None	14.591	5.33597	1.61883	7.8e-05	0.000977335	None	None	None
ENSRNA049471043	None	14867.4	4.68892	0.800548	3.18e-10	9.89e-09	None	None	None
ENSRNA049471090	None	179.168	0.314087	1.08643	3.55e-13	1.58e-11	None	None	None
ENSRNA049471356	None	2.50531	4.97196	2.80233	0.00122626	0.0102695	None	None	None
ENSRNA049471707	None	6.98383	6.21501	3.59593	0.00156307	0.0124444	None	None	None
ENSRNA049471772	None	3557.83	6.78544	0.701812	2.39e-23	2.98e-21	None	None	None
ENSRNA049471778	None	6618.47	5.81047	0.712854	2.25e-17	1.53e-15	None	None	None
ENSRNA049471882	None	267.466	13.4075	3.29596	6.46e-19	5.15e-17	None	None	None
ENSRNA049472543	None	10.707	-2.37467	0.709726	0.000136798	0.00160365	None	None	None
ENSRNA049472799	None	121.073	-0.445996	1.16852	0.000497305	0.00487489	None	None	None
ENSRNA049474050	None	274.622	5.75378	0.753635	1.3e-15	7.41e-14	None	None	None
ENSRNA049474126	None	2.25072	4.49814	2.95226	0.00325019	0.0223978	None	None	None
ENSRNA049475944	None	1075.24	6.35377	0.778275	1.82e-17	1.25e-15	None	None	None
ENSRNA049476444	None	194.104	7.34724	0.976784	3.68e-15	2.01e-13	None	None	None
ENSRNA049476447	None	61.7597	6.06602	1.12861	5.08e-09	1.35e-07	None	None	None
ENSRNA049476452	None	58.57	5.97657	1.14084	1.05e-08	2.67e-07	None	None	None
EPlOSAG00000000169	None	2.85373	5.30419	2.76244	0.0005801	0.00552518	None	None	None
EPlOSAG00000000170	None	2.4369	4.78116	2.86368	0.00189019	0.0144988	None	None	None
EPlOSAG00000000395	None	3.08418	-4.77545	2.75554	0.00142736	0.0115748	None	None	None
EPlOSAG00000000924	None	2.64304	-4.08984	2.98598	0.00551025	0.0338378	None	None	None
EPlOSAG00000001065	None	7.27585	3.97354	1.1708	9.27e-05	0.0011354	None	None	None
EPlOSAG00000001076	None	5.43693	3.98994	1.29594	0.000309505	0.00323114	None	None	None
EPlOSAG00000001099	None	7.75082	3.58554	2.33707	0.00457983	0.0294059	None	None	None
EPlOSAG00000001110	None	11.9006	5.36626	1.19166	1.75e-06	3.14e-05	None	None	None
EPlOSAG00000001121	None	7.63738	4.63645	1.1984	2.39e-05	0.000340862	None	None	None
EPlOSAG00000001602	None	5.10662	5.89407	3.29286	0.00128977	0.0106682	None	None	None
EPlOSAG00000001731	None	36.3758	-9.22756	3.32551	1.44e-06	2.63e-05	None	None	None
EPlOSAG00000001753	None	5.10662	5.89407	3.29286	0.00128977	0.0106682	None	None	None
EPlOSAG00000001976	None	3.7654	5.81325	2.81527	0.000265396	0.0028341	None	None	None
EPlOSAG00000002156	None	5.13212	-6.09116	2.64339	2.11e-05	0.000306277	None	None	None
EPlOSAG00000002824	None	2.94297	-4.71443	2.71809	0.00140138	0.011406	None	None	None
EPlOSAG00000003215	None	5.8955	6.98964	2.70492	2e-06	3.56e-05	None	None	None
EPlOSAG00000003289	None	8.96941	-1.97914	0.860815	0.00289076	0.0203939	None	None	None
EPlOSAG00000003326	None	3.46968	5.72169	2.76786	0.000248853	0.00268822	None	None	None
EPlOSAG00000003367	None	7.76151	-1.73782	0.740141	0.0042236	0.0276043	None	None	None
EPlOSAG00000003819	None	12.1801	-2.98271	1.07787	0.000443151	0.00442018	None	None	None
EPlOSAG00000003861	None	41.425	10.4559	2.92914	1.02e-15	5.87e-14	None	None	None
EPlOSAG00000003986	None	4.21063	5.1478	3.60054	0.00370323	0.024846	None	None	None
EPlOSAG00000004406	None	6.67796	-2.29546	0.892242	0.00167854	0.0131702	None	None	None
EPlOSAG00000004572	None	29.4801	-1.98104	1.07318	0.00788526	0.0443079	None	None	None
EPlOSAG00000004660	None	4.91134	-5.70838	2.84063	0.000336156	0.00347051	None	None	None
EPlOSAG00000005531	None	9.98447	-5.39859	1.3774	9.49e-07	1.8e-05	None	None	None
EPlOSAG00000005747	None	9.98447	-5.39859	1.3774	9.49e-07	1.8e-05	None	None	None
EPlOSAG00000006543	None	37.65	2.24179	0.843073	0.000980929	0.00851881	None	None	None
EPlOSAG00000006827	None	66.1697	-1.40225	0.586787	0.00505799	0.0317296	None	None	None
EPlOSAG00000006911	None	9.87157	5.57372	1.7721	3.32e-05	0.000457439	None	None	None
EPlOSAG00000006912	None	19.4765	5.11805	1.11797	4.69e-07	9.45e-06	None	None	None
EPlOSAG00000006913	None	18.403	5.00105	1.15351	1.34e-06	2.47e-05	None	None	None
EPlOSAG00000006914	None	13.3179	4.78464	1.31725	2.48e-05	0.000352588	None	None	None
EPlOSAG00000007323	None	19.2303	4.36352	1.25824	3.32e-05	0.000457152	None	None	None
EPlOSAG00000007324	None	15.5882	4.64952	0.826104	3.82e-09	1.03e-07	None	None	None
EPlOSAG00000007447	None	3.96419	3.18699	1.52245	0.00350785	0.0238117	None	None	None
EPlOSAG00000007851	None	3.43852	5.80992	2.71987	0.000149991	0.00173469	None	None	None
EPlOSAG00000008023	None	6.37368	2.82716	1.17712	0.00152395	0.0121967	None	None	None
EPlOSAG00000008053	None	37.2137	10.2684	2.92112	8.25e-15	4.34e-13	None	None	None
EPlOSAG00000008064	None	37.2137	10.2684	2.92112	8.25e-15	4.34e-13	None	None	None
EPlOSAG00000008086	None	11.7712	-7.6823	2.765	3.96e-08	9.37e-07	None	None	None
EPlOSAG00000008089	None	4.60891	6.43513	2.69266	1.6e-05	0.000238464	None	None	None
EPlOSAG00000008105	None	4.60891	6.43513	2.69266	1.6e-05	0.000238464	None	None	None
EPlOSAG00000008114	None	3.83956	-4.88483	3.04379	0.00245342	0.0179515	None	None	None
EPlOSAG00000008128	None	4.5229	-2.45078	1.36731	0.00866502	0.047497	None	None	None
EPlOSAG00000008157	None	4.49878	5.72767	3.15194	0.00108493	0.00926385	None	None	None
EPlOSAG00000008158	None	4.6599	5.65818	3.27883	0.00155499	0.0123978	None	None	None
EPlOSAG00000008159	None	3.04934	-4.74086	2.75714	0.00151704	0.0121558	None	None	None
EPlOSAG00000008217	None	28.187	-6.18163	1.05325	2.34e-10	7.41e-09	None	None	None
EPlOSAG00000008218	None	28.6921	1.28276	0.394613	0.000443527	0.00442262	None	None	None
EPlOSAG00000008235	None	15.8912	-4.79119	0.95629	1.13e-07	2.5e-06	None	None	None
EPlOSAG00000008417	None	2.2638	-3.65431	3.04262	0.00883868	0.0481972	None	None	None
EPlOSAG00000008468	None	3.76122	2.74654	1.20286	0.00282457	0.020011	None	None	None
EPlOSAG00000008496	None	194.799	12.8785	3.27029	8.35e-17	5.4e-15	None	None	None
EPlOSAG00000008501	None	29.5177	9.79864	2.93986	1.16e-11	4.32e-10	None	None	None
EPlOSAG00000008503	None	228.415	4.96467	1.15856	8.87e-07	1.69e-05	None	None	None
EPlOSAG00000008504	None	622.955	3.29231	1.61946	0.0017893	0.0138739	None	None	None
EPlOSAG00000008507	None	249.299	3.22971	0.848508	1.12e-05	0.000173219	None	None	None
EPlOSAG00000008508	None	305.86	3.69366	1.05004	2.68e-05	0.000377275	None	None	None
EPlOSAG00000008509	None	237.274	4.15426	3.51185	0.00239289	0.0176066	None	None	None
EPlOSAG00000008513	None	23.5133	9.17629	3.12383	2.9e-07	6.03e-06	None	None	None
EPlOSAG00000008514	None	44.1877	0.702601	1.43543	0.000251337	0.00271156	None	None	None
EPlOSAG00000008517	None	54.5389	5.8747	1.12874	1.29e-08	3.23e-07	None	None	None
EPlOSAG00000008518	None	57.6279	5.96711	1.11706	6.2e-09	1.62e-07	None	None	None
EPlOSAG00000008519	None	179.004	7.23096	0.967246	5.31e-15	2.86e-13	None	None	None
EPlOSAG00000008521	None	484.893	2.94492	0.488466	1.78e-10	5.71e-09	None	None	None
EPlOSAG00000008528	None	4.9455	4.16291	1.97722	0.0011143	0.00945929	None	None	None
EPlOSAG00000008535	None	5.09705	3.78674	1.4043	0.000825957	0.00739091	None	None	None
EPlOSAG00000008543	None	132.822	4.13413	2.11143	0.00121541	0.0101945	None	None	None
EPlOSAG00000008547	None	170415	12.0915	1.81061	8.41e-13	3.58e-11	None	None	None
EPlOSAG00000008548	None	16810.5	5.16133	1.59229	4.26e-05	0.000573068	None	None	None
EPlOSAG00000008549	None	19774.1	5.94406	0.631542	3.18e-22	3.56e-20	None	None	None
EPlOSAG00000008550	None	48859.2	5.94357	0.631269	2.96e-22	3.33e-20	None	None	None
EPlOSAG00000008551	None	79661.1	5.16183	2.27222	0.00051408	0.00500426	None	None	None
EPlOSAG00000008552	None	63133.6	8.01181	1.4391	1.07e-09	3.14e-08	None	None	None
EPlOSAG00000008553	None	6.62862	4.85317	1.82666	0.000214767	0.00238287	None	None	None
EPlOSAG00000008554	None	122.654	4.53389	1.02367	5.33e-07	1.06e-05	None	None	None
EPlOSAG00000008557	None	22289.2	0.448052	1.16709	0.00273728	0.019541	None	None	None
EPlOSAG00000008558	None	125.583	12.2672	3.10133	3.18e-21	3.19e-19	None	None	None
EPlOSAG00000008560	None	544.336	14.3046	3.63827	1.23e-12	5.09e-11	None	None	None
EPlOSAG00000008561	None	4.88491	5.62213	3.48893	0.00235806	0.0174114	None	None	None
EPlOSAG00000008562	None	66.9409	0.310341	1.08449	4.12e-12	1.6e-10	None	None	None
EPlOSAG00000008564	None	217.76	12.6836	3.65602	6.24e-09	1.63e-07	None	None	None
EPlOSAG00000008565	None	727.304	3.4071	0.988283	3.91e-05	0.000528321	None	None	None
EPlOSAG00000008567	None	42.6357	3.52069	1.00948	3.27e-05	0.000451375	None	None	None
EPlOSAG00000008568	None	109.716	7.51974	0.976443	1.9e-15	1.05e-13	None	None	None
EPlOSAG00000008569	None	450.335	7.07817	1.50431	9e-08	2.02e-06	None	None	None
EPlOSAG00000008592	None	38.1389	10.3297	2.894	1.71e-16	1.06e-14	None	None	None
EPlOSAG00000008962	None	6.46021	7.1772	2.6853	4.87e-07	9.76e-06	None	None	None
EPlOSAG00000009004	None	10.2795	-2.44669	0.740877	0.000150644	0.00174044	None	None	None
EPlOSAG00000009034	None	10.707	-2.37467	0.709726	0.000136798	0.00160365	None	None	None
EPlOSAG00000009054	None	16.0622	2.79107	0.71783	1.17e-05	0.000179496	None	None	None
EPlOSAG00000009133	None	11.8357	1.43912	0.628977	0.00629529	0.0375281	None	None	None
EPlOSAG00000009875	None	41.7661	-1.17025	0.512306	0.00907431	0.0491309	None	None	None
EPlOSAG00000009893	None	16.9028	-1.71555	0.554452	0.000443085	0.00442018	None	None	None
EPlOSAG00000009966	None	2.38634	4.77767	2.85102	0.00187325	0.0143853	None	None	None
EPlOSAG00000010031	None	2.75304	5.20494	2.77124	0.000723238	0.00662357	None	None	None
EPlOSAG00000010431	None	6.60882	7.20111	2.68743	4.37e-07	8.82e-06	None	None	None
EPlOSAG00000010451	None	3.4182	3.68523	1.80194	0.00154899	0.0123618	None	None	None
EPlOSAG00000010535	None	15.5271	-1.46746	0.638822	0.00535793	0.0331712	None	None	None
EPlOSAG00000010604	None	2.07441	4.26102	2.99235	0.00445248	0.0287478	None	None	None
EPlOSAG00000010674	None	20.2549	4.58257	1.09894	2.38e-06	4.17e-05	None	None	None
EPlOSAG00000011131	None	7.77235	-1.79732	0.783456	0.00423166	0.0276462	None	None	None
EPlOSAG00000011224	None	6.10853	6.92089	2.77826	8.33e-06	0.000131913	None	None	None
EPlOSAG00000011376	None	5.42882	6.1541	3.1785	0.000699153	0.00644341	None	None	None
EPlOSAG00000011469	None	18.083	-8.50286	2.80305	9.21e-11	3.08e-09	None	None	None
EPlOSAG00000011983	None	2.75652	3.23743	1.79985	0.00306271	0.0213291	None	None	None
EPlOSAG00000011996	None	17.2306	3.01763	0.790486	1.28e-05	0.00019507	None	None	None
EPlOSAG00000012400	None	6.70861	5.0173	1.65138	5.12e-05	0.000672607	None	None	None
EPlOSAG00000012767	None	5.04642	6.47484	2.79298	4.24e-05	0.000570001	None	None	None
EPlOSAG00000012768	None	2.58524	3.05792	1.90146	0.00480709	0.0305264	None	None	None
EPlOSAG00000012769	None	2.39485	2.89269	1.91515	0.00612948	0.0367353	None	None	None
EPlOSAG00000012798	None	4.41199	6.28113	2.78049	7.09e-05	0.000897752	None	None	None
EPlOSAG00000012844	None	2.26171	4.6039	2.89368	0.00260181	0.0187534	None	None	None
EPlOSAG00000012955	None	3.68557	5.84963	2.74972	0.000159229	0.0018258	None	None	None
EPlOSAG00000013105	None	51.4868	-1.39617	0.357855	3.09e-05	0.000429093	None	None	None
EPlOSAG00000013199	None	8.22562	-1.89668	0.804215	0.00367831	0.0247292	None	None	None
EPlOSAG00000013385	None	3.59697	-3.16497	1.82578	0.00467317	0.0298755	None	None	None
EPlOSAG00000013406	None	9.78939	-5.36077	1.41754	2.23e-06	3.92e-05	None	None	None
EPlOSAG00000013467	None	3.41748	2.94194	1.44233	0.00445428	0.0287482	None	None	None
EPlOSAG00000014221	None	6.74351	-1.8489	0.822606	0.00503201	0.031608	None	None	None
EPlOSAG00000015367	None	1.99878	4.17715	3.00025	0.00492627	0.0310876	None	None	None
EPlOSAG00000016604	None	2.81779	-4.49386	2.80144	0.00251295	0.0182856	None	None	None
EPlOSAG00000016654	None	6.65547	3.82602	1.13869	0.000105138	0.00127009	None	None	None
EPlOSAG00000016783	None	6.52478	-2.35862	1.09967	0.00411222	0.0269861	None	None	None
EPlOSAG00000016807	None	3.13933	-4.89981	2.69666	0.000913419	0.00803177	None	None	None
EPlOSAG00000016822	None	6.74082	3.34303	1.14151	0.000343335	0.00353107	None	None	None
EPlOSAG00000016824	None	12.1594	6.23545	1.41936	4.09e-08	9.65e-07	None	None	None
EPlOSAG00000016878	None	6.91935	-3.90081	1.16796	8.25e-05	0.00102875	None	None	None
EPlOSAG00000016942	None	4.9536	-6.00679	2.66553	3.39e-05	0.000464353	None	None	None
EPlOSAG00000016953	None	4.64232	-5.85733	2.65113	5.52e-05	0.000718405	None	None	None
EPlOSAG00000016971	None	6.85165	2.24165	0.885862	0.00160783	0.0127314	None	None	None
EPlOSAG00000016976	None	3.82484	-5.39413	2.67011	0.000259342	0.00278095	None	None	None
EPlOSAG00000017020	None	4.0092	-5.30404	2.80303	0.000645055	0.00601752	None	None	None
EPlOSAG00000017113	None	66.4661	1.15308	0.371918	0.000891062	0.00787484	None	None	None
EPlOSAG00000017618	None	8.65067	-4.69722	1.96062	0.000663372	0.00616612	None	None	None
EPlOSAG00000017842	None	14.3562	-1.94525	0.53685	6.18e-05	0.000794686	None	None	None
EPlOSAG00000018051	None	2.19376	-3.67675	2.96139	0.00820145	0.045566	None	None	None
EPlOSAG00000018356	None	3.93579	-5.46986	2.66238	0.000200695	0.0022468	None	None	None
EPlOSAG00000018916	None	15.4132	-8.2007	2.78461	1.01e-09	2.98e-08	None	None	None
EPlOSAG00000018941	None	2.1751	4.48334	2.91018	0.00309231	0.0214938	None	None	None
EPlOSAG00000019095	None	5.68544	-6.17589	2.73878	4.59e-05	0.000611353	None	None	None
EPlOSAG00000019241	None	10.3318	-2.5677	1.53895	0.00636681	0.0378335	None	None	None
EPlOSAG00000019843	None	754.74	15.159	3.311	2.46e-37	1.01e-34	None	None	None
EPlOSAG00000019866	None	782.169	4.47506	0.931932	9.41e-08	2.11e-06	None	None	None
EPlOSAG00000019966	None	8.56516	7.0246	3.24632	0.000245612	0.0026631	None	None	None
EPlOSAG00000019988	None	17.6587	8.88393	2.90127	5.01e-09	1.33e-07	None	None	None
EPlOSAG00000020010	None	101.142	11.9303	3.05513	2.72e-21	2.74e-19	None	None	None
EPlOSAG00000020032	None	527.04	14.2567	3.63771	1.47e-12	6e-11	None	None	None
EPlOSAG00000020066	None	1.95544	3.98951	3.08452	0.00628357	0.0374715	None	None	None
EPlOSAG00000020077	None	1277.46	15.1835	4.27519	3.36e-08	8e-07	None	None	None
EPlOSAG00000020088	None	28.0673	0.558171	1.26221	0.00145201	0.0117356	None	None	None
EPlOSAG00000020099	None	160.534	1.07773	2.15504	0.00545431	0.0335636	None	None	None
EPlOSAG00000020121	None	16.4017	8.55142	3.06797	1.33e-06	2.45e-05	None	None	None
EPlOSAG00000020279	None	6.13611	1.93088	0.97061	0.00716174	0.0413213	None	None	None
EPlOSAG00000020535	None	2.86817	-4.30659	2.97262	0.0043055	0.0279978	None	None	None
EPlOSAG00000020581	None	5.95422	-3.69985	1.24208	0.00032155	0.00333717	None	None	None
EPlOSAG00000020773	None	5.43422	6.82897	2.68142	2.71e-06	4.69e-05	None	None	None
EPlOSAG00000020872	None	5.42579	-3.52309	2.22889	0.00466704	0.0298661	None	None	None
EPlOSAG00000021027	None	2.46617	4.86433	2.84302	0.00161736	0.0127888	None	None	None
EPlOSAG00000021164	None	3.3656	-4.8743	2.82408	0.0014902	0.0119751	None	None	None
EPlOSAG00000021889	None	3.84788	5.9585	2.75847	0.000132004	0.00155506	None	None	None
EPlOSAG00000022598	None	5.41043	-3.31332	1.50281	0.00238476	0.0175583	None	None	None
EPlOSAG00000022837	None	7.17023	-2.99622	1.00244	0.000408493	0.0041173	None	None	None
EPlOSAG00000022894	None	18.4234	-1.68858	0.678594	0.00251661	0.0183004	None	None	None
EPlOSAG00000023247	None	2.63828	5.03823	2.81858	0.00114513	0.00969307	None	None	None
EPlOSAG00000023742	None	120.567	8.02835	2.39987	2.27e-05	0.000325372	None	None	None
EPlOSAG00000023750	None	129.493	5.79136	0.872018	1.76e-12	7.14e-11	None	None	None
EPlOSAG00000023751	None	26.4596	6.07505	1.06173	2.35e-09	6.56e-08	None	None	None
EPlOSAG00000023752	None	243.744	5.95673	0.875043	5.4e-13	2.36e-11	None	None	None
EPlOSAG00000023753	None	14.1269	4.65329	1.5681	0.000178629	0.00202157	None	None	None
EPlOSAG00000023754	None	370.941	5.73484	0.85228	9.49e-13	4e-11	None	None	None
EPlOSAG00000023756	None	27.9237	5.97712	1.325	5.99e-07	1.18e-05	None	None	None
EPlOSAG00000023757	None	5.42042	3.56432	1.64667	0.00230748	0.0171056	None	None	None
EPlOSAG00000023758	None	12.5053	2.31152	1.29826	0.00614122	0.0367925	None	None	None
EPlOSAG00000023814	None	7.24522	5.23073	1.59003	1.81e-05	0.000266968	None	None	None
EPlOSAG00000023815	None	4.43854	4.16261	1.81053	0.000711712	0.00653048	None	None	None
EPlOSAG00000023816	None	3.68618	3.6478	1.93565	0.00213206	0.0160246	None	None	None
EPlOSAG00000023915	None	3.17905	5.4021	2.82779	0.000621557	0.00584215	None	None	None
EPlOSAG00000023916	None	3.04882	3.37245	1.88894	0.00300408	0.0210079	None	None	None
EPlOSAG00000023931	None	9.19902	-1.70686	0.875146	0.00906188	0.0490995	None	None	None
EPlOSAG00000023976	None	12.6298	-3.3175	1.49505	0.00149009	0.0119751	None	None	None
EPlOSAG00000023985	None	10.2503	-1.81152	0.942755	0.00746156	0.0426163	None	None	None
EPlOSAG00000024379	None	18.348	-3.66605	1.98597	0.00282315	0.0200051	None	None	None
EPlOSAG00000024386	None	10.7003	-2.93881	1.27711	0.00162313	0.0128223	None	None	None
EPlOSAG00000024648	None	28.741	1.14583	0.434341	0.00377427	0.0252375	None	None	None
EPlOSAG00000025446	None	11.2421	4.46163	0.885519	1.12e-07	2.47e-06	None	None	None
EPlOSAG00000025540	None	5.71642	0.814627	1.58165	0.00842054	0.0465356	None	None	None
EPlOSAG00000027130	None	2.87471	-2.79465	1.81782	0.00860568	0.0472619	None	None	None
EPlOSAG00000027651	None	2.87471	-2.79465	1.81782	0.00860568	0.0472619	None	None	None
EPlOSAG00000027744	None	6.42438	1.94452	1.00581	0.00757954	0.0431387	None	None	None
EPlOSAG00000028184	None	2.77095	3.99594	4.10303	0.00922245	0.0496687	None	None	None
EPlOSAG00000028665	None	16.1433	-8.2786	2.79446	7.76e-10	2.31e-08	None	None	None
EPlOSAG00000030410	None	2.74343	-2.81372	1.72457	0.00747274	0.0426482	None	None	None
EPlOSAG00000031115	None	10.2243	-3.34601	1.72199	0.00291677	0.0205342	None	None	None
EPlOSAG00000031212	None	16.8681	-1.99068	0.544867	4.7e-05	0.000625009	None	None	None
EPlOSAG00000031508	None	3.70453	6.00567	2.68807	6.58e-05	0.000840243	None	None	None
EPlOSAG00000031627	None	2.74343	-2.81372	1.72457	0.00747274	0.0426482	None	None	None
EPlOSAG00000032177	None	10.4787	2.4108	0.88485	0.000809632	0.00727391	None	None	None
EPlOSAG00000032383	None	37.4401	-2.85787	0.842858	6.83e-05	0.00086971	None	None	None
EPlOSAG00000032647	None	2.6823	5.01769	2.92757	0.0017164	0.0134178	None	None	None
EPlOSAG00000032802	None	15.4378	-4.74209	0.962161	1.68e-07	3.63e-06	None	None	None
EPlOSAG00000032837	None	2.6823	5.01769	2.92757	0.0017164	0.0134178	None	None	None
EPlOSAG00000032844	None	23.0041	-3.19027	1.2755	0.00081249	0.00729568	None	None	None
EPlOSAG00000033774	None	9.17649	-7.1733	2.76262	9.43e-07	1.79e-05	None	None	None
EPlOSAG00000034335	None	15.2224	-7.92769	2.97857	1.29e-06	2.39e-05	None	None	None
EPlOSAG00000034812	None	9.17649	-7.1733	2.76262	9.43e-07	1.79e-05	None	None	None
EPlOSAG00000034843	None	163.69	0.313422	1.08592	0.0014846	0.0119473	None	None	None
EPlOSAG00000035029	None	2.87978	-3.90423	3.32321	0.00823317	0.0456818	None	None	None
EPlOSAG00000035580	None	4.65602	6.51527	2.68332	1.09e-05	0.000168769	None	None	None
EPlOSAG00000035926	None	5.00593	5.8424	3.30041	0.00138582	0.011308	None	None	None
EPlOSAG00000036178	None	4.65602	6.51527	2.68332	1.09e-05	0.000168769	None	None	None
EPlOSAG00000036399	None	12.9397	4.09742	2.13774	0.00202289	0.0153113	None	None	None
EPlOSAG00000036495	None	3.45303	5.75841	2.73344	0.000181944	0.00205608	None	None	None
EPlOSAG00000036596	None	5.00593	5.8424	3.30041	0.00138582	0.011308	None	None	None
EPlOSAG00000037619	None	2.6007	-4.28002	2.81618	0.00347847	0.0236697	None	None	None
EPlOSAG00000037887	None	69.7173	-0.939961	0.377153	0.00689811	0.0401306	None	None	None
EPlOSAG00000038754	None	7.7199	-6.7699	2.78758	9.28e-06	0.000145491	None	None	None
EPlOSAG00000039476	None	12.52	-2.668	1.28044	0.00252466	0.018343	None	None	None
EPlOSAG00000039489	None	2.6007	-4.28002	2.81618	0.00347847	0.0236697	None	None	None
EPlOSAG00000039696	None	6.14134	6.94529	2.8028	1.12e-05	0.000171888	None	None	None
EPlOSAG00000040001	None	3.80712	-5.18682	2.80533	0.000816583	0.00732264	None	None	None
EPlOSAG00000040107	None	6.14134	6.94529	2.8028	1.12e-05	0.000171888	None	None	None
EPlOSAG00000040737	None	8.32919	3.14741	1.32481	0.00126354	0.0104927	None	None	None
EPlOSAG00000041426	None	4.04104	-2.79705	1.28089	0.0029437	0.0206715	None	None	None
EPlOSAG00000043508	None	13.6786	-7.92172	2.81628	3.37e-08	8.01e-07	None	None	None
EPlOSAG00000044112	None	9.57549	-2.07158	0.679345	0.00047078	0.00465429	None	None	None
EPlOSAG00000044472	None	7.50802	-3.10406	0.951386	0.000175387	0.00199135	None	None	None
EPlOSAG00000045110	None	3.32368	2.76056	1.58606	0.00751506	0.0428342	None	None	None
EPlOSAG00000045176	None	8.09856	3.25903	1.17233	0.000462088	0.00458456	None	None	None
EPlOSAG00000045221	None	11.1736	4.35261	0.969784	1.14e-06	2.13e-05	None	None	None
EPlOSAG00000045243	None	4.68124	3.59837	1.37905	0.0010665	0.00912503	None	None	None
EPlOSAG00000045265	None	7.66003	4.54793	1.26783	5.48e-05	0.000713703	None	None	None
EPlOSAG00000045287	None	7.96813	4.15665	1.0853	2.06e-05	0.000299525	None	None	None
EPlOSAG00000045354	None	12.6998	2.71568	1.02704	0.000755176	0.00686922	None	None	None
EPlOSAG00000045387	None	22.4275	1.42339	0.519724	0.00191012	0.014618	None	None	None
EPlOSAG00000045454	None	17.2205	4.23453	1.15475	1.69e-05	0.000250041	None	None	None
EPlOSAG00000045543	None	15.4244	3.07727	0.982847	0.000147408	0.00171071	None	None	None
EPlOSAG00000045565	None	21.9169	4.07412	1.03924	6.03e-06	9.78e-05	None	None	None
EPlOSAG00000045576	None	23.4075	4.74237	0.815971	7.09e-10	2.12e-08	None	None	None
EPlOSAG00000045598	None	8.54125	3.18704	1.33046	0.00118366	0.00996994	None	None	None
EPlOSAG00000045609	None	13.4299	4.78924	1.33767	2.94e-05	0.000410696	None	None	None
EPlOSAG00000045643	None	6.75267	7.03571	2.84161	1.24e-05	0.000189584	None	None	None
EPlOSAG00000045665	None	11.4706	5.19229	1.291	9.48e-06	0.000148359	None	None	None
EPlOSAG00000045676	None	4.17605	3.15921	1.63183	0.00434058	0.0281551	None	None	None
EPlOSAG00000045687	None	12.8082	4.63994	1.39874	6.81e-05	0.000868396	None	None	None
EPlOSAG00000045709	None	4.80496	3.26901	1.7208	0.00403425	0.0265945	None	None	None
EPlOSAG00000045765	None	7.85543	2.05744	0.975126	0.00476621	0.0303357	None	None	None
EPlOSAG00000045787	None	7.25681	3.84874	1.24225	0.000202494	0.00226467	None	None	None
EPlOSAG00000045820	None	9.39781	3.68127	0.958649	1.36e-05	0.000205371	None	None	None
EPlOSAG00000045831	None	3.71904	5.8693	2.76709	0.000174485	0.00198515	None	None	None
EPlOSAG00000045842	None	12.7135	6.27201	1.44516	5.91e-08	1.36e-06	None	None	None
EPlOSAG00000045898	None	15.8678	2.65937	0.859637	0.000208774	0.0023233	None	None	None
EPlOSAG00000045942	None	2.96058	5.27862	2.82483	0.000780583	0.00705066	None	None	None
EPlOSAG00000045966	None	3.06127	5.42056	2.77803	0.00049148	0.00482625	None	None	None
EPlOSAG00000045977	None	2.85003	4.99156	2.9835	0.00191396	0.014641	None	None	None
EPlOSAG00000046032	None	6.33445	3.28533	1.11742	0.000357886	0.00366331	None	None	None
EPlOSAG00000046054	None	4.12416	2.70508	1.40382	0.00518778	0.0323745	None	None	None
EPlOSAG00000046057	None	8.56389	7.73013	2.69589	1.73e-08	4.25e-07	None	None	None
EPlOSAG00000046099	None	7.13372	3.87939	1.21086	0.0001572	0.00180686	None	None	None
EPlOSAG00000046110	None	24.4473	9.52574	2.87757	5.22e-12	2.01e-10	None	None	None
EPlOSAG00000046165	None	5.51598	2.62699	5.26674	0.00792379	0.0444574	None	None	None
EPlOSAG00000046176	None	4.19416	5.27435	3.47153	0.00301532	0.0210615	None	None	None
EPlOSAG00000046210	None	7.94322	5.52109	1.45959	1.57e-06	2.84e-05	None	None	None
EPlOSAG00000046254	None	2.6357	4.61857	3.15726	0.00384676	0.0256252	None	None	None
EPlOSAG00000046321	None	12.9524	4.90418	1.12741	1.95e-06	3.48e-05	None	None	None
EPlOSAG00000046332	None	4.20613	4.08834	1.784	0.000744353	0.00678358	None	None	None
EPlOSAG00000046343	None	10.9281	4.61981	1.14507	7.31e-06	0.00011644	None	None	None
EPlOSAG00000046354	None	1.94934	4.0828	3.09028	0.00610295	0.036609	None	None	None
EPlOSAG00000046365	None	9.78016	4.39926	1.19684	2.75e-05	0.000386294	None	None	None
EPlOSAG00000046421	None	5.18685	6.67232	2.70116	7.21e-06	0.000115081	None	None	None
EPlOSAG00000046454	None	13.5545	5.00516	1.12343	1.34e-06	2.46e-05	None	None	None
EPlOSAG00000046465	None	8.30188	7.42948	2.86394	4.08e-06	6.81e-05	None	None	None
EPlOSAG00000046487	None	6.5706	3.61997	1.34071	0.000642575	0.00599939	None	None	None
EPlOSAG00000046498	None	1.98359	3.90865	3.18833	0.00725172	0.0416567	None	None	None
EPlOSAG00000046665	None	2.64136	5.00666	2.83156	0.00124024	0.0103539	None	None	None
EPlOSAG00000046676	None	4.41371	6.22854	2.76316	6.54e-05	0.000836507	None	None	None
EPlOSAG00000046687	None	3.11458	3.65602	1.6848	0.00118478	0.0099769	None	None	None
EPlOSAG00000046698	None	9.96354	5.9525	1.40238	1.03e-07	2.3e-06	None	None	None
EPlOSAG00000046731	None	3.41542	5.69327	2.76161	0.000255537	0.00274717	None	None	None
EPlOSAG00000046743	None	3.70541	4.46743	4.1897	0.00705733	0.0408251	None	None	None
EPlOSAG00000046754	None	2.33011	4.70219	2.90448	0.00241015	0.0176948	None	None	None
EPlOSAG00000046798	None	8.28906	5.54092	1.51128	2.97e-06	5.1e-05	None	None	None
EPlOSAG00000046809	None	5.24576	4.00745	2.21337	0.00203754	0.0154038	None	None	None
EPlOSAG00000046842	None	6.6174	5.12171	1.56903	2.08e-05	0.000302239	None	None	None
EPlOSAG00000046965	None	1.78025	3.74571	3.14385	0.00822237	0.0456294	None	None	None
EPlOSAG00000046976	None	11.9238	7.76532	3.17267	3.86e-05	0.00052177	None	None	None
EPlOSAG00000046987	None	11.1131	4.9813	1.49511	8.44e-05	0.0010485	None	None	None
EPlOSAG00000046998	None	7.05456	4.7788	2.01694	0.000500753	0.00490011	None	None	None
EPlOSAG00000047076	None	22.8834	-2.49569	1.1057	0.00235127	0.0173689	None	None	None
EPlOSAG00000047462	None	2.8277	-4.6139	2.72331	0.00169639	0.0132979	None	None	None
EPlOSAG00000047686	None	457.853	3.0891	0.363861	2.23e-18	1.68e-16	None	None	None
EPlOSAG00000047829	None	6.40768	-6.52896	2.67948	5.18e-06	8.49e-05	None	None	None
EPlOSAG00000047842	None	10.7043	8.00292	2.80944	8.83e-08	1.99e-06	None	None	None
EPlOSAG00000048841	None	4.54322	6.43244	2.68799	1.55e-05	0.000231648	None	None	None
EPlOSAG00000048905	None	3.76496	6.01799	2.68643	6.11e-05	0.000786776	None	None	None
EPlOSAG00000049092	None	3.96484	4.22973	1.59969	0.000259291	0.00278095	None	None	None
EPlOSAG00000049209	None	10.857	-2.01029	0.94131	0.00483333	0.0306525	None	None	None
EPlOSAG00000049543	None	4.17821	2.01944	0.9769	0.00641612	0.038052	None	None	None
EPlOSAG00000049606	None	113.897	-1.2855	0.345054	7.44e-05	0.000937621	None	None	None
EPlOSAG00000049636	None	29.1757	-2.38124	0.757505	0.000231529	0.002537	None	None	None
EPlOSAG00000049962	None	144.772	-1.55288	0.485268	0.000376331	0.00383342	None	None	None
EPlOSAG00000050096	None	34.3205	-3.75752	0.55591	3.88e-12	1.51e-10	None	None	None
EPlOSAG00000050109	None	15.3646	2.49225	1.14956	0.00254007	0.0184412	None	None	None
EPlOSAG00000050286	None	3.8163	5.7258	2.87526	0.000418933	0.00420612	None	None	None
EPlOSAG00000050364	None	6.22506	4.06979	1.42886	0.000475252	0.00469022	None	None	None
EPlOSAG00000050410	None	14.1604	5.56807	1.26124	2e-06	3.55e-05	None	None	None
EPlOSAG00000050454	None	11.5783	2.97025	1.29309	0.00150402	0.0120631	None	None	None
EPlOSAG00000050793	None	2.91378	5.2779	2.85226	0.000909834	0.00800492	None	None	None
EPlOSAG00000051075	None	60.3639	-1.02413	0.378738	0.00345047	0.0235173	None	None	None
EPlOSAG00000051081	None	292.265	-3.109	0.350469	7.96e-20	6.79e-18	None	None	None
EPlOSAG00000051227	None	2.50531	4.97196	2.80233	0.00122626	0.0102695	None	None	None
EPlOSAG00000051233	None	20.699	-1.94667	0.855151	0.00356757	0.0241291	None	None	None
EPlOSAG00000051236	None	5.73928	-2.5867	0.996415	0.00145732	0.0117701	None	None	None
EPlOSAG00000051237	None	2.50531	4.97196	2.80233	0.00122626	0.0102695	None	None	None
EPlOSAG00000051298	None	2.59365	2.92854	2.0813	0.00724836	0.0416567	None	None	None
EPlOSAG00000051309	None	10.0573	3.86848	1.30333	0.000220404	0.00243897	None	None	None
EPlOSAG00000051466	None	5.83355	-6.32004	2.6793	1.33e-05	0.000201639	None	None	None
EPlOSAG00000051531	None	39.2496	-7.58845	1.32662	1.47e-12	6.01e-11	None	None	None
EPlOSAG00000051551	None	15.0822	-2.0295	1.12884	0.00810558	0.0452205	None	None	None
EPlOSAG00000052116	None	14.3692	-6.01233	1.36366	4.93e-08	1.15e-06	None	None	None
EPlOSAG00000052670	None	3.18404	3.70957	1.69082	0.00110945	0.00943003	None	None	None
EPlOSAG00000052681	None	3.0547	-4.78209	2.7316	0.00129945	0.0107299	None	None	None
EPlOSAG00000052775	None	13.9782	2.09628	0.951843	0.00356827	0.0241291	None	None	None
EPlOSAG00000053143	None	2.75802	4.73929	3.07625	0.00292575	0.0205802	None	None	None
EPlOSAG00000053254	None	2.21227	4.49823	2.98176	0.00355608	0.0240759	None	None	None
EPlOSAG00000053304	None	2.55598	-4.0147	2.98076	0.00591543	0.035701	None	None	None
OS01G0101150	LOC_Os01g01115	32.037	10.0439	2.87772	4e-15	2.18e-13	GO:0008150	P	biological_process
OS01G0103400	None	17.1545	-8.39568	2.80143	3.05e-10	9.51e-09	None	None	None
OS01G0105300	LOC_Os01g01560	25.9064	-3.02174	0.577272	3.13e-08	7.47e-07	None	None	None
OS01G0105400	LOC_Os01g01570	844.96	-0.879711	0.158997	2.06e-08	5e-07	None	None	None
OS01G0105700	LOC_Os01g01600	141.297	-2.36288	0.292113	1.04e-16	6.63e-15	GO:0005634	C	nucleus
OS01G0105700	LOC_Os01g01600	141.297	-2.36288	0.292113	1.04e-16	6.63e-15	GO:0009058	P	biosynthetic process
OS01G0105700	LOC_Os01g01600	141.297	-2.36288	0.292113	1.04e-16	6.63e-15	GO:0006139	P	nucleobase, nucleoside, nucleotide and nucleic acid metabolic process
OS01G0105700	LOC_Os01g01600	141.297	-2.36288	0.292113	1.04e-16	6.63e-15	GO:0003700	F	sequence-specific DNA binding transcription factor activity
OS01G0105900	LOC_Os01g01620	1653.7	-0.947851	0.329872	0.00234537	0.017338	GO:0005575	C	cellular_component
OS01G0105900	LOC_Os01g01620	1653.7	-0.947851	0.329872	0.00234537	0.017338	GO:0008152	P	metabolic process
OS01G0105900	LOC_Os01g01620	1653.7	-0.947851	0.329872	0.00234537	0.017338	GO:0009987	P	cellular process
OS01G0105900	LOC_Os01g01620	1653.7	-0.947851	0.329872	0.00234537	0.017338	GO:0005975	P	carbohydrate metabolic process
OS01G0105900	LOC_Os01g01620	1653.7	-0.947851	0.329872	0.00234537	0.017338	GO:0009056	P	catabolic process
OS01G0105900	LOC_Os01g01620	1653.7	-0.947851	0.329872	0.00234537	0.017338	GO:0016301	F	kinase activity
OS01G0106600	LOC_Os01g01680	126.085	0.962081	0.356316	0.00389591	0.0259012	GO:0003824	F	catalytic activity
OS01G0106600	LOC_Os01g01680	126.085	0.962081	0.356316	0.00389591	0.0259012	GO:0008152	P	metabolic process
OS01G0106600	LOC_Os01g01680	126.085	0.962081	0.356316	0.00389591	0.0259012	GO:0009536	C	plastid
OS01G0107700	LOC_Os01g01780	297.606	-0.558231	0.212655	0.00703605	0.0407405	GO:0003674	F	molecular_function
OS01G0107700	LOC_Os01g01780	297.606	-0.558231	0.212655	0.00703605	0.0407405	GO:0016020	C	membrane
OS01G0107700	LOC_Os01g01780	297.606	-0.558231	0.212655	0.00703605	0.0407405	GO:0008150	P	biological_process
OS01G0108600	LOC_Os01g01870	994.36	-1.80872	0.749923	0.00272021	0.0194521	GO:0005634	C	nucleus
OS01G0108600	LOC_Os01g01870	994.36	-1.80872	0.749923	0.00272021	0.0194521	GO:0009058	P	biosynthetic process
OS01G0108600	LOC_Os01g01870	994.36	-1.80872	0.749923	0.00272021	0.0194521	GO:0006139	P	nucleobase, nucleoside, nucleotide and nucleic acid metabolic process
OS01G0108600	LOC_Os01g01870	994.36	-1.80872	0.749923	0.00272021	0.0194521	GO:0003700	F	sequence-specific DNA binding transcription factor activity
OS01G0108600	LOC_Os01g01870	994.36	-1.80872	0.749923	0.00272021	0.0194521	GO:0005737	C	cytoplasm
OS01G0110200	LOC_Os01g02010	45.1153	5.77006	1.22536	1.64e-07	3.55e-06	None	None	None
OS01G0110800	LOC_Os01g02060	3219.49	-1.23506	0.552653	0.00904	0.0490084	GO:0008150	P	biological_process
OS01G0110800	LOC_Os01g02060	3219.49	-1.23506	0.552653	0.00904	0.0490084	GO:0007165	P	signal transduction
OS01G0110800	LOC_Os01g02060	3219.49	-1.23506	0.552653	0.00904	0.0490084	GO:0009607	P	response to biotic stimulus
OS01G0110800	LOC_Os01g02060	3219.49	-1.23506	0.552653	0.00904	0.0490084	GO:0005886	C	plasma membrane
OS01G0110800	LOC_Os01g02060	3219.49	-1.23506	0.552653	0.00904	0.0490084	GO:0009536	C	plastid
OS01G0110800	LOC_Os01g02060	3219.49	-1.23506	0.552653	0.00904	0.0490084	GO:0008150	P	biological_process
OS01G0110800	LOC_Os01g02060	3219.49	-1.23506	0.552653	0.00904	0.0490084	GO:0007165	P	signal transduction
OS01G0110800	LOC_Os01g02060	3219.49	-1.23506	0.552653	0.00904	0.0490084	GO:0009607	P	response to biotic stimulus
OS01G0110800	LOC_Os01g02060	3219.49	-1.23506	0.552653	0.00904	0.0490084	GO:0005886	C	plasma membrane
OS01G0110800	LOC_Os01g02060	3219.49	-1.23506	0.552653	0.00904	0.0490084	GO:0009536	C	plastid
OS01G0111100	LOC_Os01g02080	83.8322	2.33409	0.462677	7.22e-08	1.65e-06	GO:0019538	P	protein metabolic process
OS01G0111100	LOC_Os01g02080	83.8322	2.33409	0.462677	7.22e-08	1.65e-06	GO:0009987	P	cellular process
OS01G0111100	LOC_Os01g02080	83.8322	2.33409	0.462677	7.22e-08	1.65e-06	GO:0003824	F	catalytic activity
OS01G0111100	LOC_Os01g02080	83.8322	2.33409	0.462677	7.22e-08	1.65e-06	GO:0009536	C	plastid
OS01G0111100	LOC_Os01g02080	83.8322	2.33409	0.462677	7.22e-08	1.65e-06	GO:0009579	C	thylakoid
OS01G0111100	LOC_Os01g02080	83.8322	2.33409	0.462677	7.22e-08	1.65e-06	GO:0006464	P	protein modification process
OS01G0111600	LOC_Os01g02120	1063.11	4.02723	0.406101	3e-24	4.3e-22	GO:0005634	C	nucleus
OS01G0111600	LOC_Os01g02120	1063.11	4.02723	0.406101	3e-24	4.3e-22	GO:0009791	P	post-embryonic development
OS01G0111600	LOC_Os01g02120	1063.11	4.02723	0.406101	3e-24	4.3e-22	GO:0008289	F	lipid binding
OS01G0111600	LOC_Os01g02120	1063.11	4.02723	0.406101	3e-24	4.3e-22	GO:0009719	P	response to endogenous stimulus
OS01G0111800	LOC_Os01g02139	1765	0.987479	0.311335	0.000826346	0.00739242	None	None	None
OS01G0111900	LOC_Os01g02150	3004.07	1.22449	0.326169	7.66e-05	0.000960839	None	None	None
OS01G0112050	LOC_Os01g02170	33.9106	-1.46811	0.596404	0.00384522	0.0256207	GO:0003674	F	molecular_function
OS01G0112050	LOC_Os01g02170	33.9106	-1.46811	0.596404	0.00384522	0.0256207	GO:0005730	C	nucleolus
OS01G0112050	LOC_Os01g02170	33.9106	-1.46811	0.596404	0.00384522	0.0256207	GO:0008150	P	biological_process
OS01G0112050	LOC_Os01g02170	33.9106	-1.46811	0.596404	0.00384522	0.0256207	GO:0003674	F	molecular_function
OS01G0112050	LOC_Os01g02170	33.9106	-1.46811	0.596404	0.00384522	0.0256207	GO:0005730	C	nucleolus
OS01G0112050	LOC_Os01g02170	33.9106	-1.46811	0.596404	0.00384522	0.0256207	GO:0008150	P	biological_process
OS01G0112300	LOC_Os01g02180	822.484	-0.509222	0.153566	0.000778998	0.00704013	GO:0003674	F	molecular_function
OS01G0112300	LOC_Os01g02180	822.484	-0.509222	0.153566	0.000778998	0.00704013	GO:0005575	C	cellular_component
OS01G0112300	LOC_Os01g02180	822.484	-0.509222	0.153566	0.000778998	0.00704013	GO:0008150	P	biological_process
OS01G0112300	LOC_Os01g02180	822.484	-0.509222	0.153566	0.000778998	0.00704013	GO:0003674	F	molecular_function
OS01G0112300	LOC_Os01g02180	822.484	-0.509222	0.153566	0.000778998	0.00704013	GO:0005575	C	cellular_component
OS01G0112300	LOC_Os01g02180	822.484	-0.509222	0.153566	0.000778998	0.00704013	GO:0008150	P	biological_process
OS01G0113000	LOC_Os01g02270	36.2113	-3.46449	0.507591	1.11e-12	4.63e-11	None	None	None
OS01G0113400	LOC_Os01g02320	99.1154	2.50616	0.288489	5.25e-19	4.23e-17	GO:0005975	P	carbohydrate metabolic process
OS01G0113400	LOC_Os01g02320	99.1154	2.50616	0.288489	5.25e-19	4.23e-17	GO:0009987	P	cellular process
OS01G0113400	LOC_Os01g02320	99.1154	2.50616	0.288489	5.25e-19	4.23e-17	GO:0008152	P	metabolic process
OS01G0113400	LOC_Os01g02320	99.1154	2.50616	0.288489	5.25e-19	4.23e-17	GO:0006950	P	response to stress
OS01G0113400	LOC_Os01g02320	99.1154	2.50616	0.288489	5.25e-19	4.23e-17	GO:0016301	F	kinase activity
OS01G0113400	LOC_Os01g02320	99.1154	2.50616	0.288489	5.25e-19	4.23e-17	GO:0016787	F	hydrolase activity
OS01G0113450	None	6.23609	7.04488	2.74345	3.08e-06	5.27e-05	None	None	None
OS01G0113500	None	120.754	-6.7482	0.615344	2.33e-28	4.85e-26	None	None	None
OS01G0113600	LOC_Os01g02334	500.779	-1.22031	0.35036	0.000208478	0.00232077	None	None	None
OS01G0113650	None	137.176	-2.54843	0.920004	0.00053266	0.00514021	None	None	None
OS01G0113700	LOC_Os01g02350	286.117	-1.25166	0.287914	5.68e-06	9.26e-05	GO:0005623	C	cell
OS01G0113700	LOC_Os01g02350	286.117	-1.25166	0.287914	5.68e-06	9.26e-05	GO:0008152	P	metabolic process
OS01G0113700	LOC_Os01g02350	286.117	-1.25166	0.287914	5.68e-06	9.26e-05	GO:0009987	P	cellular process
OS01G0113700	LOC_Os01g02350	286.117	-1.25166	0.287914	5.68e-06	9.26e-05	GO:0016301	F	kinase activity
OS01G0113700	LOC_Os01g02350	286.117	-1.25166	0.287914	5.68e-06	9.26e-05	GO:0000166	F	nucleotide binding
OS01G0113700	LOC_Os01g02350	286.117	-1.25166	0.287914	5.68e-06	9.26e-05	GO:0006464	P	protein modification process
OS01G0113800	LOC_Os01g02360	111.688	-1.94777	0.502605	1.97e-05	0.000287812	GO:0005623	C	cell
OS01G0113800	LOC_Os01g02360	111.688	-1.94777	0.502605	1.97e-05	0.000287812	GO:0008152	P	metabolic process
OS01G0113800	LOC_Os01g02360	111.688	-1.94777	0.502605	1.97e-05	0.000287812	GO:0009987	P	cellular process
OS01G0113800	LOC_Os01g02360	111.688	-1.94777	0.502605	1.97e-05	0.000287812	GO:0016301	F	kinase activity
OS01G0113800	LOC_Os01g02360	111.688	-1.94777	0.502605	1.97e-05	0.000287812	GO:0000166	F	nucleotide binding
OS01G0113800	LOC_Os01g02360	111.688	-1.94777	0.502605	1.97e-05	0.000287812	GO:0006464	P	protein modification process
OS01G0114100	LOC_Os01g02390	565.77	0.398622	0.147714	0.00635611	0.0377833	GO:0005623	C	cell
OS01G0114100	LOC_Os01g02390	565.77	0.398622	0.147714	0.00635611	0.0377833	GO:0008152	P	metabolic process
OS01G0114100	LOC_Os01g02390	565.77	0.398622	0.147714	0.00635611	0.0377833	GO:0009987	P	cellular process
OS01G0114100	LOC_Os01g02390	565.77	0.398622	0.147714	0.00635611	0.0377833	GO:0016301	F	kinase activity
OS01G0114100	LOC_Os01g02390	565.77	0.398622	0.147714	0.00635611	0.0377833	GO:0006464	P	protein modification process
OS01G0114100	LOC_Os01g02390	565.77	0.398622	0.147714	0.00635611	0.0377833	GO:0005623	C	cell
OS01G0114100	LOC_Os01g02390	565.77	0.398622	0.147714	0.00635611	0.0377833	GO:0008152	P	metabolic process
OS01G0114100	LOC_Os01g02390	565.77	0.398622	0.147714	0.00635611	0.0377833	GO:0009987	P	cellular process
OS01G0114100	LOC_Os01g02390	565.77	0.398622	0.147714	0.00635611	0.0377833	GO:0016301	F	kinase activity
OS01G0114100	LOC_Os01g02390	565.77	0.398622	0.147714	0.00635611	0.0377833	GO:0006464	P	protein modification process
OS01G0114700	LOC_Os01g02440	27.5916	1.97509	0.933229	0.00481808	0.0305731	GO:0008152	P	metabolic process
OS01G0114700	LOC_Os01g02440	27.5916	1.97509	0.933229	0.00481808	0.0305731	GO:0009987	P	cellular process
OS01G0114700	LOC_Os01g02440	27.5916	1.97509	0.933229	0.00481808	0.0305731	GO:0007165	P	signal transduction
OS01G0114700	LOC_Os01g02440	27.5916	1.97509	0.933229	0.00481808	0.0305731	GO:0009607	P	response to biotic stimulus
OS01G0114700	LOC_Os01g02440	27.5916	1.97509	0.933229	0.00481808	0.0305731	GO:0005575	C	cellular_component
OS01G0114700	LOC_Os01g02440	27.5916	1.97509	0.933229	0.00481808	0.0305731	GO:0016301	F	kinase activity
OS01G0114700	LOC_Os01g02440	27.5916	1.97509	0.933229	0.00481808	0.0305731	GO:0006464	P	protein modification process
OS01G0114700	LOC_Os01g02440	27.5916	1.97509	0.933229	0.00481808	0.0305731	GO:0004872	F	receptor activity
OS01G0114700	LOC_Os01g02440	27.5916	1.97509	0.933229	0.00481808	0.0305731	GO:0004871	F	signal transducer activity
OS01G0115600	LOC_Os01g02560	38.4044	-0.992675	0.357975	0.00290881	0.0204911	GO:0005623	C	cell
OS01G0115600	LOC_Os01g02560	38.4044	-0.992675	0.357975	0.00290881	0.0204911	GO:0008152	P	metabolic process
OS01G0115600	LOC_Os01g02560	38.4044	-0.992675	0.357975	0.00290881	0.0204911	GO:0009987	P	cellular process
OS01G0115600	LOC_Os01g02560	38.4044	-0.992675	0.357975	0.00290881	0.0204911	GO:0016301	F	kinase activity
OS01G0115600	LOC_Os01g02560	38.4044	-0.992675	0.357975	0.00290881	0.0204911	GO:0000166	F	nucleotide binding
OS01G0115600	LOC_Os01g02560	38.4044	-0.992675	0.357975	0.00290881	0.0204911	GO:0006464	P	protein modification process
OS01G0115700	LOC_Os01g02570	12.7855	8.38935	2.78445	2.62e-09	7.25e-08	GO:0005623	C	cell
OS01G0115700	LOC_Os01g02570	12.7855	8.38935	2.78445	2.62e-09	7.25e-08	GO:0008152	P	metabolic process
OS01G0115700	LOC_Os01g02570	12.7855	8.38935	2.78445	2.62e-09	7.25e-08	GO:0009987	P	cellular process
OS01G0115700	LOC_Os01g02570	12.7855	8.38935	2.78445	2.62e-09	7.25e-08	GO:0016301	F	kinase activity
OS01G0115700	LOC_Os01g02570	12.7855	8.38935	2.78445	2.62e-09	7.25e-08	GO:0000166	F	nucleotide binding
OS01G0115700	LOC_Os01g02570	12.7855	8.38935	2.78445	2.62e-09	7.25e-08	GO:0006464	P	protein modification process
OS01G0115750	LOC_Os01g02580	34.3563	4.971	1.42445	2.46e-05	0.000349972	GO:0005623	C	cell
OS01G0115750	LOC_Os01g02580	34.3563	4.971	1.42445	2.46e-05	0.000349972	GO:0008152	P	metabolic process
OS01G0115750	LOC_Os01g02580	34.3563	4.971	1.42445	2.46e-05	0.000349972	GO:0009987	P	cellular process
OS01G0115750	LOC_Os01g02580	34.3563	4.971	1.42445	2.46e-05	0.000349972	GO:0016301	F	kinase activity
OS01G0115750	LOC_Os01g02580	34.3563	4.971	1.42445	2.46e-05	0.000349972	GO:0006464	P	protein modification process
OS01G0115900	LOC_Os01g02600	65.4186	1.57622	0.349109	1.84e-06	3.29e-05	GO:0005623	C	cell
OS01G0115900	LOC_Os01g02600	65.4186	1.57622	0.349109	1.84e-06	3.29e-05	GO:0008152	P	metabolic process
OS01G0115900	LOC_Os01g02600	65.4186	1.57622	0.349109	1.84e-06	3.29e-05	GO:0009987	P	cellular process
OS01G0115900	LOC_Os01g02600	65.4186	1.57622	0.349109	1.84e-06	3.29e-05	GO:0016301	F	kinase activity
OS01G0115900	LOC_Os01g02600	65.4186	1.57622	0.349109	1.84e-06	3.29e-05	GO:0006464	P	protein modification process
OS01G0116400	LOC_Os01g02700	298.533	-3.24872	0.200489	5.37e-60	6.22e-57	GO:0005623	C	cell
OS01G0116400	LOC_Os01g02700	298.533	-3.24872	0.200489	5.37e-60	6.22e-57	GO:0008152	P	metabolic process
OS01G0116400	LOC_Os01g02700	298.533	-3.24872	0.200489	5.37e-60	6.22e-57	GO:0009987	P	cellular process
OS01G0116400	LOC_Os01g02700	298.533	-3.24872	0.200489	5.37e-60	6.22e-57	GO:0016301	F	kinase activity
OS01G0116400	LOC_Os01g02700	298.533	-3.24872	0.200489	5.37e-60	6.22e-57	GO:0000166	F	nucleotide binding
OS01G0116400	LOC_Os01g02700	298.533	-3.24872	0.200489	5.37e-60	6.22e-57	GO:0006464	P	protein modification process
OS01G0116650	None	34.2731	-9.54114	2.97543	1.29e-11	4.77e-10	None	None	None
OS01G0116800	LOC_Os01g02730	46.9895	2.33933	0.39877	7.83e-10	2.33e-08	GO:0005623	C	cell
OS01G0116800	LOC_Os01g02730	46.9895	2.33933	0.39877	7.83e-10	2.33e-08	GO:0008152	P	metabolic process
OS01G0116800	LOC_Os01g02730	46.9895	2.33933	0.39877	7.83e-10	2.33e-08	GO:0009987	P	cellular process
OS01G0116800	LOC_Os01g02730	46.9895	2.33933	0.39877	7.83e-10	2.33e-08	GO:0016301	F	kinase activity
OS01G0116800	LOC_Os01g02730	46.9895	2.33933	0.39877	7.83e-10	2.33e-08	GO:0006464	P	protein modification process
OS01G0117000	LOC_Os01g02760	11.8037	3.90982	0.899606	1.84e-06	3.29e-05	GO:0005623	C	cell
OS01G0117000	LOC_Os01g02760	11.8037	3.90982	0.899606	1.84e-06	3.29e-05	GO:0008152	P	metabolic process
OS01G0117000	LOC_Os01g02760	11.8037	3.90982	0.899606	1.84e-06	3.29e-05	GO:0009987	P	cellular process
OS01G0117000	LOC_Os01g02760	11.8037	3.90982	0.899606	1.84e-06	3.29e-05	GO:0016301	F	kinase activity
OS01G0117000	LOC_Os01g02760	11.8037	3.90982	0.899606	1.84e-06	3.29e-05	GO:0000166	F	nucleotide binding
OS01G0117000	LOC_Os01g02760	11.8037	3.90982	0.899606	1.84e-06	3.29e-05	GO:0006464	P	protein modification process
OS01G0117025	None	9.05811	2.57133	1.05385	0.0014637	0.0118074	None	None	None
OS01G0118100	LOC_Os01g02884	1585.88	-1.02207	0.401532	0.00547929	0.0336864	None	None	None
OS01G0118300	LOC_Os01g02890	828.099	-0.761357	0.235153	0.000841481	0.00750382	GO:0016740	F	transferase activity
OS01G0118300	LOC_Os01g02890	828.099	-0.761357	0.235153	0.000841481	0.00750382	GO:0005634	C	nucleus
OS01G0118300	LOC_Os01g02890	828.099	-0.761357	0.235153	0.000841481	0.00750382	GO:0009058	P	biosynthetic process
OS01G0118300	LOC_Os01g02890	828.099	-0.761357	0.235153	0.000841481	0.00750382	GO:0009987	P	cellular process
OS01G0118300	LOC_Os01g02890	828.099	-0.761357	0.235153	0.000841481	0.00750382	GO:0006629	P	lipid metabolic process
OS01G0118300	LOC_Os01g02890	828.099	-0.761357	0.235153	0.000841481	0.00750382	GO:0016020	C	membrane
OS01G0118300	LOC_Os01g02890	828.099	-0.761357	0.235153	0.000841481	0.00750382	GO:0005783	C	endoplasmic reticulum
OS01G0119500	LOC_Os01g02960	648.455	-1.59925	0.471763	0.00017919	0.00202699	None	None	None
OS01G0119800	None	158.404	-3.12394	0.612268	2.83e-08	6.77e-07	None	None	None
OS01G0120300	LOC_Os01g03020	1647.88	3.81075	0.157389	1.66e-130	1.86e-126	GO:0003824	F	catalytic activity
OS01G0120300	LOC_Os01g03020	1647.88	3.81075	0.157389	1.66e-130	1.86e-126	GO:0008152	P	metabolic process
OS01G0120300	LOC_Os01g03020	1647.88	3.81075	0.157389	1.66e-130	1.86e-126	GO:0000166	F	nucleotide binding
OS01G0120300	LOC_Os01g03020	1647.88	3.81075	0.157389	1.66e-130	1.86e-126	GO:0006412	P	translation
OS01G0120300	LOC_Os01g03020	1647.88	3.81075	0.157389	1.66e-130	1.86e-126	GO:0006139	P	nucleobase, nucleoside, nucleotide and nucleic acid metabolic process
OS01G0120300	LOC_Os01g03020	1647.88	3.81075	0.157389	1.66e-130	1.86e-126	GO:0005739	C	mitochondrion
OS01G0120300	LOC_Os01g03020	1647.88	3.81075	0.157389	1.66e-130	1.86e-126	GO:0000003	P	reproduction
OS01G0120300	LOC_Os01g03020	1647.88	3.81075	0.157389	1.66e-130	1.86e-126	GO:0009791	P	post-embryonic development
OS01G0120300	LOC_Os01g03020	1647.88	3.81075	0.157389	1.66e-130	1.86e-126	GO:0009790	P	embryo development
OS01G0120300	LOC_Os01g03020	1647.88	3.81075	0.157389	1.66e-130	1.86e-126	GO:0009536	C	plastid
OS01G0120300	LOC_Os01g03020	1647.88	3.81075	0.157389	1.66e-130	1.86e-126	GO:0003824	F	catalytic activity
OS01G0120300	LOC_Os01g03020	1647.88	3.81075	0.157389	1.66e-130	1.86e-126	GO:0008152	P	metabolic process
OS01G0120300	LOC_Os01g03020	1647.88	3.81075	0.157389	1.66e-130	1.86e-126	GO:0000166	F	nucleotide binding
OS01G0120300	LOC_Os01g03020	1647.88	3.81075	0.157389	1.66e-130	1.86e-126	GO:0006412	P	translation
OS01G0120300	LOC_Os01g03020	1647.88	3.81075	0.157389	1.66e-130	1.86e-126	GO:0006139	P	nucleobase, nucleoside, nucleotide and nucleic acid metabolic process
OS01G0120300	LOC_Os01g03020	1647.88	3.81075	0.157389	1.66e-130	1.86e-126	GO:0005739	C	mitochondrion
OS01G0120300	LOC_Os01g03020	1647.88	3.81075	0.157389	1.66e-130	1.86e-126	GO:0000003	P	reproduction
OS01G0120300	LOC_Os01g03020	1647.88	3.81075	0.157389	1.66e-130	1.86e-126	GO:0009791	P	post-embryonic development
OS01G0120300	LOC_Os01g03020	1647.88	3.81075	0.157389	1.66e-130	1.86e-126	GO:0009790	P	embryo development
OS01G0120300	LOC_Os01g03020	1647.88	3.81075	0.157389	1.66e-130	1.86e-126	GO:0009536	C	plastid
OS01G0120600	LOC_Os01g03050	348.692	-2.1345	0.659182	0.000176888	0.00200465	GO:0005488	F	binding
OS01G0120600	LOC_Os01g03050	348.692	-2.1345	0.659182	0.000176888	0.00200465	GO:0009536	C	plastid
OS01G0120600	LOC_Os01g03050	348.692	-2.1345	0.659182	0.000176888	0.00200465	GO:0008152	P	metabolic process
OS01G0120600	LOC_Os01g03050	348.692	-2.1345	0.659182	0.000176888	0.00200465	GO:0009579	C	thylakoid
OS01G0120600	LOC_Os01g03050	348.692	-2.1345	0.659182	0.000176888	0.00200465	GO:0003824	F	catalytic activity
OS01G0121100	LOC_Os01g03090	1294.9	-0.513858	0.178968	0.00347379	0.02365	GO:0005634	C	nucleus
OS01G0121100	LOC_Os01g03090	1294.9	-0.513858	0.178968	0.00347379	0.02365	GO:0005829	C	cytosol
OS01G0121100	LOC_Os01g03090	1294.9	-0.513858	0.178968	0.00347379	0.02365	GO:0005634	C	nucleus
OS01G0121100	LOC_Os01g03090	1294.9	-0.513858	0.178968	0.00347379	0.02365	GO:0005829	C	cytosol
OS01G0121300	LOC_Os01g03110	1589.37	-1.51054	0.44332	0.000186422	0.00210313	GO:0005623	C	cell
OS01G0121300	LOC_Os01g03110	1589.37	-1.51054	0.44332	0.000186422	0.00210313	GO:0003674	F	molecular_function
OS01G0121300	LOC_Os01g03110	1589.37	-1.51054	0.44332	0.000186422	0.00210313	GO:0008150	P	biological_process
OS01G0121500	LOC_Os01g03130	187.806	-1.76234	0.924858	0.00893546	0.0485907	GO:0003674	F	molecular_function
OS01G0121500	LOC_Os01g03130	187.806	-1.76234	0.924858	0.00893546	0.0485907	GO:0008150	P	biological_process
OS01G0121600	LOC_Os01g03144	758.192	-2.9544	0.979189	0.00018718	0.00210956	GO:0006810	P	transport
OS01G0121600	LOC_Os01g03144	758.192	-2.9544	0.979189	0.00018718	0.00210956	GO:0009987	P	cellular process
OS01G0121600	LOC_Os01g03144	758.192	-2.9544	0.979189	0.00018718	0.00210956	GO:0016787	F	hydrolase activity
OS01G0121600	LOC_Os01g03144	758.192	-2.9544	0.979189	0.00018718	0.00210956	GO:0005215	F	transporter activity
OS01G0121600	LOC_Os01g03144	758.192	-2.9544	0.979189	0.00018718	0.00210956	GO:0009056	P	catabolic process
OS01G0121600	LOC_Os01g03144	758.192	-2.9544	0.979189	0.00018718	0.00210956	GO:0006139	P	nucleobase, nucleoside, nucleotide and nucleic acid metabolic process
OS01G0121600	LOC_Os01g03144	758.192	-2.9544	0.979189	0.00018718	0.00210956	GO:0009536	C	plastid
OS01G0123500	LOC_Os01g03270	6.28878	-6.24028	2.8505	9.94e-05	0.00120748	GO:0005634	C	nucleus
OS01G0123500	LOC_Os01g03270	6.28878	-6.24028	2.8505	9.94e-05	0.00120748	GO:0019538	P	protein metabolic process
OS01G0123500	LOC_Os01g03270	6.28878	-6.24028	2.8505	9.94e-05	0.00120748	GO:0009056	P	catabolic process
OS01G0123500	LOC_Os01g03270	6.28878	-6.24028	2.8505	9.94e-05	0.00120748	GO:0009987	P	cellular process
OS01G0123500	LOC_Os01g03270	6.28878	-6.24028	2.8505	9.94e-05	0.00120748	GO:0007275	P	multicellular organismal development
OS01G0123500	LOC_Os01g03270	6.28878	-6.24028	2.8505	9.94e-05	0.00120748	GO:0006464	P	protein modification process
OS01G0123500	LOC_Os01g03270	6.28878	-6.24028	2.8505	9.94e-05	0.00120748	GO:0005488	F	binding
OS01G0123500	LOC_Os01g03270	6.28878	-6.24028	2.8505	9.94e-05	0.00120748	GO:0003824	F	catalytic activity
OS01G0124900	LOC_Os01g03400	9.37719	7.83599	2.75716	5.97e-08	1.37e-06	GO:0005634	C	nucleus
OS01G0124900	LOC_Os01g03400	9.37719	7.83599	2.75716	5.97e-08	1.37e-06	GO:0019538	P	protein metabolic process
OS01G0124900	LOC_Os01g03400	9.37719	7.83599	2.75716	5.97e-08	1.37e-06	GO:0009056	P	catabolic process
OS01G0124900	LOC_Os01g03400	9.37719	7.83599	2.75716	5.97e-08	1.37e-06	GO:0009987	P	cellular process
OS01G0124900	LOC_Os01g03400	9.37719	7.83599	2.75716	5.97e-08	1.37e-06	GO:0007275	P	multicellular organismal development
OS01G0124900	LOC_Os01g03400	9.37719	7.83599	2.75716	5.97e-08	1.37e-06	GO:0006464	P	protein modification process
OS01G0124900	LOC_Os01g03400	9.37719	7.83599	2.75716	5.97e-08	1.37e-06	GO:0005488	F	binding
OS01G0124900	LOC_Os01g03400	9.37719	7.83599	2.75716	5.97e-08	1.37e-06	GO:0005622	C	intracellular
OS01G0124900	LOC_Os01g03400	9.37719	7.83599	2.75716	5.97e-08	1.37e-06	GO:0003824	F	catalytic activity
OS01G0124900	LOC_Os01g03410	9.37719	7.83599	2.75716	5.97e-08	1.37e-06	GO:0005634	C	nucleus
OS01G0124900	LOC_Os01g03410	9.37719	7.83599	2.75716	5.97e-08	1.37e-06	GO:0019538	P	protein metabolic process
OS01G0124900	LOC_Os01g03410	9.37719	7.83599	2.75716	5.97e-08	1.37e-06	GO:0009056	P	catabolic process
OS01G0124900	LOC_Os01g03410	9.37719	7.83599	2.75716	5.97e-08	1.37e-06	GO:0009987	P	cellular process
OS01G0124900	LOC_Os01g03410	9.37719	7.83599	2.75716	5.97e-08	1.37e-06	GO:0007275	P	multicellular organismal development
OS01G0124900	LOC_Os01g03410	9.37719	7.83599	2.75716	5.97e-08	1.37e-06	GO:0006464	P	protein modification process
OS01G0124900	LOC_Os01g03410	9.37719	7.83599	2.75716	5.97e-08	1.37e-06	GO:0005488	F	binding
OS01G0124900	LOC_Os01g03410	9.37719	7.83599	2.75716	5.97e-08	1.37e-06	GO:0005622	C	intracellular
OS01G0124900	LOC_Os01g03410	9.37719	7.83599	2.75716	5.97e-08	1.37e-06	GO:0003824	F	catalytic activity
OS01G0126100	LOC_Os01g03530	2110.25	-1.42082	0.467087	0.000697273	0.00642786	GO:0009991	P	response to extracellular stimulus
OS01G0126100	LOC_Os01g03530	2110.25	-1.42082	0.467087	0.000697273	0.00642786	GO:0007154	P	cell communication
OS01G0126100	LOC_Os01g03530	2110.25	-1.42082	0.467087	0.000697273	0.00642786	GO:0006950	P	response to stress
OS01G0126100	LOC_Os01g03530	2110.25	-1.42082	0.467087	0.000697273	0.00642786	GO:0005783	C	endoplasmic reticulum
OS01G0126100	LOC_Os01g03530	2110.25	-1.42082	0.467087	0.000697273	0.00642786	GO:0003824	F	catalytic activity
OS01G0126100	LOC_Os01g03530	2110.25	-1.42082	0.467087	0.000697273	0.00642786	GO:0009628	P	response to abiotic stimulus
OS01G0126100	LOC_Os01g03530	2110.25	-1.42082	0.467087	0.000697273	0.00642786	GO:0005488	F	binding
OS01G0126100	LOC_Os01g03530	2110.25	-1.42082	0.467087	0.000697273	0.00642786	GO:0008152	P	metabolic process
OS01G0126100	LOC_Os01g03530	2110.25	-1.42082	0.467087	0.000697273	0.00642786	GO:0007275	P	multicellular organismal development
OS01G0126100	LOC_Os01g03530	2110.25	-1.42082	0.467087	0.000697273	0.00642786	GO:0009991	P	response to extracellular stimulus
OS01G0126100	LOC_Os01g03530	2110.25	-1.42082	0.467087	0.000697273	0.00642786	GO:0007154	P	cell communication
OS01G0126100	LOC_Os01g03530	2110.25	-1.42082	0.467087	0.000697273	0.00642786	GO:0006950	P	response to stress
OS01G0126100	LOC_Os01g03530	2110.25	-1.42082	0.467087	0.000697273	0.00642786	GO:0005783	C	endoplasmic reticulum
OS01G0126100	LOC_Os01g03530	2110.25	-1.42082	0.467087	0.000697273	0.00642786	GO:0003824	F	catalytic activity
OS01G0126100	LOC_Os01g03530	2110.25	-1.42082	0.467087	0.000697273	0.00642786	GO:0009628	P	response to abiotic stimulus
OS01G0126100	LOC_Os01g03530	2110.25	-1.42082	0.467087	0.000697273	0.00642786	GO:0005488	F	binding
OS01G0126100	LOC_Os01g03530	2110.25	-1.42082	0.467087	0.000697273	0.00642786	GO:0008152	P	metabolic process
OS01G0126100	LOC_Os01g03530	2110.25	-1.42082	0.467087	0.000697273	0.00642786	GO:0007275	P	multicellular organismal development
OS01G0126200	LOC_Os01g03549	108.446	2.10344	0.362489	1.25e-09	3.61e-08	GO:0009991	P	response to extracellular stimulus
OS01G0126200	LOC_Os01g03549	108.446	2.10344	0.362489	1.25e-09	3.61e-08	GO:0007154	P	cell communication
OS01G0126200	LOC_Os01g03549	108.446	2.10344	0.362489	1.25e-09	3.61e-08	GO:0006950	P	response to stress
OS01G0126200	LOC_Os01g03549	108.446	2.10344	0.362489	1.25e-09	3.61e-08	GO:0005783	C	endoplasmic reticulum
OS01G0126200	LOC_Os01g03549	108.446	2.10344	0.362489	1.25e-09	3.61e-08	GO:0003824	F	catalytic activity
OS01G0126200	LOC_Os01g03549	108.446	2.10344	0.362489	1.25e-09	3.61e-08	GO:0009628	P	response to abiotic stimulus
OS01G0126200	LOC_Os01g03549	108.446	2.10344	0.362489	1.25e-09	3.61e-08	GO:0005488	F	binding
OS01G0126200	LOC_Os01g03549	108.446	2.10344	0.362489	1.25e-09	3.61e-08	GO:0008152	P	metabolic process
OS01G0126200	LOC_Os01g03549	108.446	2.10344	0.362489	1.25e-09	3.61e-08	GO:0007275	P	multicellular organismal development
OS01G0127600	LOC_Os01g03680	607.673	-2.0608	0.818649	0.00160625	0.0127219	None	None	None
OS01G0127700	LOC_Os01g03690	161.959	-1.943	0.450246	3.03e-06	5.19e-05	GO:0005623	C	cell
OS01G0127700	LOC_Os01g03690	161.959	-1.943	0.450246	3.03e-06	5.19e-05	GO:0016301	F	kinase activity
OS01G0127700	LOC_Os01g03690	161.959	-1.943	0.450246	3.03e-06	5.19e-05	GO:0000166	F	nucleotide binding
OS01G0127700	LOC_Os01g03690	161.959	-1.943	0.450246	3.03e-06	5.19e-05	GO:0006464	P	protein modification process
OS01G0128200	LOC_Os01g03730	241.219	1.27742	0.284816	3.02e-06	5.18e-05	GO:0005623	C	cell
OS01G0128200	LOC_Os01g03730	241.219	1.27742	0.284816	3.02e-06	5.18e-05	GO:0009056	P	catabolic process
OS01G0128200	LOC_Os01g03730	241.219	1.27742	0.284816	3.02e-06	5.18e-05	GO:0006259	P	DNA metabolic process
OS01G0128200	LOC_Os01g03730	241.219	1.27742	0.284816	3.02e-06	5.18e-05	GO:0004518	F	nuclease activity
OS01G0128200	LOC_Os01g03730	241.219	1.27742	0.284816	3.02e-06	5.18e-05	GO:0003676	F	nucleic acid binding
OS01G0128400	LOC_Os01g03760	6435.91	-0.558742	0.201203	0.00466571	0.0298659	GO:0003674	F	molecular_function
OS01G0128400	LOC_Os01g03760	6435.91	-0.558742	0.201203	0.00466571	0.0298659	GO:0016020	C	membrane
OS01G0128400	LOC_Os01g03760	6435.91	-0.558742	0.201203	0.00466571	0.0298659	GO:0005773	C	vacuole
OS01G0128400	LOC_Os01g03760	6435.91	-0.558742	0.201203	0.00466571	0.0298659	GO:0005634	C	nucleus
OS01G0128400	LOC_Os01g03760	6435.91	-0.558742	0.201203	0.00466571	0.0298659	GO:0005783	C	endoplasmic reticulum
OS01G0128400	LOC_Os01g03760	6435.91	-0.558742	0.201203	0.00466571	0.0298659	GO:0005575	C	cellular_component
OS01G0128400	LOC_Os01g03760	6435.91	-0.558742	0.201203	0.00466571	0.0298659	GO:0005886	C	plasma membrane
OS01G0128400	LOC_Os01g03760	6435.91	-0.558742	0.201203	0.00466571	0.0298659	GO:0003674	F	molecular_function
OS01G0128400	LOC_Os01g03760	6435.91	-0.558742	0.201203	0.00466571	0.0298659	GO:0016020	C	membrane
OS01G0128400	LOC_Os01g03760	6435.91	-0.558742	0.201203	0.00466571	0.0298659	GO:0008150	P	biological_process
OS01G0128700	LOC_Os01g03810	133.401	-1.12434	0.307264	0.000117898	0.00140366	None	None	None
OS01G0128800	LOC_Os01g03820	2473.73	-1.09053	0.209686	9.74e-08	2.18e-06	GO:0003674	F	molecular_function
OS01G0128800	LOC_Os01g03820	2473.73	-1.09053	0.209686	9.74e-08	2.18e-06	GO:0008150	P	biological_process
OS01G0130500	None	58.2111	-1.56191	0.565974	0.00157309	0.0125006	None	None	None
OS01G0132000	LOC_Os01g04050	2086.29	-1.64316	0.35475	9.54e-07	1.8e-05	None	None	None
OS01G0133832	None	135.863	0.85057	0.346096	0.00887822	0.0483735	None	None	None
OS01G0134200	LOC_Os01g04250	17.6107	-4.93414	1.08057	8.44e-07	1.62e-05	None	None	None
OS01G0134700	LOC_Os01g04280	649.947	-1.78147	0.654667	0.00126005	0.0104689	GO:0005575	C	cellular_component
OS01G0134700	LOC_Os01g04280	649.947	-1.78147	0.654667	0.00126005	0.0104689	GO:0005515	F	protein binding
OS01G0134700	LOC_Os01g04280	649.947	-1.78147	0.654667	0.00126005	0.0104689	GO:0008150	P	biological_process
OS01G0135600	LOC_Os01g04324	31.4543	1.45965	0.536209	0.00195612	0.0149057	None	None	None
OS01G0135900	LOC_Os01g04350	131.113	2.36752	1.20963	0.00419743	0.0274493	GO:0006950	P	response to stress
OS01G0135900	LOC_Os01g04350	131.113	2.36752	1.20963	0.00419743	0.0274493	GO:0009628	P	response to abiotic stimulus
OS01G0136100	LOC_Os01g04370	200.549	2.08795	0.365005	2e-09	5.63e-08	GO:0009628	P	response to abiotic stimulus
OS01G0136100	LOC_Os01g04370	200.549	2.08795	0.365005	2e-09	5.63e-08	GO:0006950	P	response to stress
OS01G0136200	LOC_Os01g04380	61.1815	1.59131	0.568461	0.00130894	0.0107897	GO:0009628	P	response to abiotic stimulus
OS01G0136200	LOC_Os01g04380	61.1815	1.59131	0.568461	0.00130894	0.0107897	GO:0006950	P	response to stress
OS01G0136450	None	38.3748	-1.12749	0.461947	0.00619712	0.0370679	None	None	None
OS01G0136500	None	32.1104	4.55511	0.626781	5.96e-14	2.86e-12	None	None	None
OS01G0136600	None	2.93836	-4.69622	2.72833	0.00149627	0.0120123	None	None	None
OS01G0137250	LOC_Os01g04480	18.8235	-8.54012	2.83468	3.32e-10	1.03e-08	GO:0005975	P	carbohydrate metabolic process
OS01G0137250	LOC_Os01g04480	18.8235	-8.54012	2.83468	3.32e-10	1.03e-08	GO:0009987	P	cellular process
OS01G0137250	LOC_Os01g04480	18.8235	-8.54012	2.83468	3.32e-10	1.03e-08	GO:0008152	P	metabolic process
OS01G0137250	LOC_Os01g04480	18.8235	-8.54012	2.83468	3.32e-10	1.03e-08	GO:0006950	P	response to stress
OS01G0137250	LOC_Os01g04480	18.8235	-8.54012	2.83468	3.32e-10	1.03e-08	GO:0016301	F	kinase activity
OS01G0137250	LOC_Os01g04480	18.8235	-8.54012	2.83468	3.32e-10	1.03e-08	GO:0016787	F	hydrolase activity
OS01G0137300	LOC_Os01g04500	74.4781	-7.23089	0.898433	7.42e-16	4.28e-14	None	None	None
OS01G0137500	LOC_Os01g04520	8.87482	-7.15441	2.72098	4.18e-07	8.46e-06	GO:0005623	C	cell
OS01G0137500	LOC_Os01g04520	8.87482	-7.15441	2.72098	4.18e-07	8.46e-06	GO:0008152	P	metabolic process
OS01G0137500	LOC_Os01g04520	8.87482	-7.15441	2.72098	4.18e-07	8.46e-06	GO:0009987	P	cellular process
OS01G0137500	LOC_Os01g04520	8.87482	-7.15441	2.72098	4.18e-07	8.46e-06	GO:0016301	F	kinase activity
OS01G0137500	LOC_Os01g04520	8.87482	-7.15441	2.72098	4.18e-07	8.46e-06	GO:0000166	F	nucleotide binding
OS01G0137500	LOC_Os01g04520	8.87482	-7.15441	2.72098	4.18e-07	8.46e-06	GO:0006464	P	protein modification process
OS01G0137550	None	4.77225	-4.69375	3.66091	0.00538684	0.0332826	None	None	None
OS01G0138500	LOC_Os01g04590	297.251	-3.94681	1.19226	4.6e-05	0.000613615	GO:0003674	F	molecular_function
OS01G0138500	LOC_Os01g04590	297.251	-3.94681	1.19226	4.6e-05	0.000613615	GO:0008150	P	biological_process
OS01G0139200	LOC_Os01g04650	5440.16	0.605147	0.202518	0.0023133	0.0171374	GO:0005634	C	nucleus
OS01G0139200	LOC_Os01g04650	5440.16	0.605147	0.202518	0.0023133	0.0171374	GO:0005829	C	cytosol
OS01G0139700	LOC_Os01g04670	411.52	-3.77998	1.05276	1.88e-05	0.000275671	None	None	None
OS01G0140100	LOC_Os01g04710	1844.58	1.2047	0.208947	3.75e-09	1.01e-07	GO:0005623	C	cell
OS01G0140100	LOC_Os01g04710	1844.58	1.2047	0.208947	3.75e-09	1.01e-07	GO:0019538	P	protein metabolic process
OS01G0140100	LOC_Os01g04710	1844.58	1.2047	0.208947	3.75e-09	1.01e-07	GO:0016787	F	hydrolase activity
OS01G0140500	LOC_Os01g04730	3500.86	0.768851	0.264551	0.00255498	0.0185032	GO:0016020	C	membrane
OS01G0140500	LOC_Os01g04730	3500.86	0.768851	0.264551	0.00255498	0.0185032	GO:0005634	C	nucleus
OS01G0140500	LOC_Os01g04730	3500.86	0.768851	0.264551	0.00255498	0.0185032	GO:0005840	C	ribosome
OS01G0140500	LOC_Os01g04730	3500.86	0.768851	0.264551	0.00255498	0.0185032	GO:0006950	P	response to stress
OS01G0140500	LOC_Os01g04730	3500.86	0.768851	0.264551	0.00255498	0.0185032	GO:0009628	P	response to abiotic stimulus
OS01G0140500	LOC_Os01g04730	3500.86	0.768851	0.264551	0.00255498	0.0185032	GO:0005829	C	cytosol
OS01G0140500	LOC_Os01g04730	3500.86	0.768851	0.264551	0.00255498	0.0185032	GO:0005773	C	vacuole
OS01G0140500	LOC_Os01g04730	3500.86	0.768851	0.264551	0.00255498	0.0185032	GO:0005730	C	nucleolus
OS01G0140500	LOC_Os01g04730	3500.86	0.768851	0.264551	0.00255498	0.0185032	GO:0006412	P	translation
OS01G0140500	LOC_Os01g04730	3500.86	0.768851	0.264551	0.00255498	0.0185032	GO:0005198	F	structural molecule activity
OS01G0140500	LOC_Os01g04730	3500.86	0.768851	0.264551	0.00255498	0.0185032	GO:0005886	C	plasma membrane
OS01G0140500	LOC_Os01g04730	3500.86	0.768851	0.264551	0.00255498	0.0185032	GO:0009536	C	plastid
OS01G0140700	LOC_Os01g04750	92.6773	-1.67401	0.492645	0.000176453	0.00200075	GO:0009058	P	biosynthetic process
OS01G0140700	LOC_Os01g04750	92.6773	-1.67401	0.492645	0.000176453	0.00200075	GO:0006139	P	nucleobase, nucleoside, nucleotide and nucleic acid metabolic process
OS01G0140700	LOC_Os01g04750	92.6773	-1.67401	0.492645	0.000176453	0.00200075	GO:0003677	F	DNA binding
OS01G0140700	LOC_Os01g04750	92.6773	-1.67401	0.492645	0.000176453	0.00200075	GO:0003700	F	sequence-specific DNA binding transcription factor activity
OS01G0140700	LOC_Os01g04750	92.6773	-1.67401	0.492645	0.000176453	0.00200075	GO:0009536	C	plastid
OS01G0141000	LOC_Os01g04800	5134.96	1.45068	0.638467	0.00665698	0.0390805	GO:0003677	F	DNA binding
OS01G0141000	LOC_Os01g04800	5134.96	1.45068	0.638467	0.00665698	0.0390805	GO:0009719	P	response to endogenous stimulus
OS01G0141000	LOC_Os01g04800	5134.96	1.45068	0.638467	0.00665698	0.0390805	GO:0007165	P	signal transduction
OS01G0141000	LOC_Os01g04800	5134.96	1.45068	0.638467	0.00665698	0.0390805	GO:0009058	P	biosynthetic process
OS01G0141000	LOC_Os01g04800	5134.96	1.45068	0.638467	0.00665698	0.0390805	GO:0006139	P	nucleobase, nucleoside, nucleotide and nucleic acid metabolic process
OS01G0141000	LOC_Os01g04800	5134.96	1.45068	0.638467	0.00665698	0.0390805	GO:0003700	F	sequence-specific DNA binding transcription factor activity
OS01G0141000	LOC_Os01g04800	5134.96	1.45068	0.638467	0.00665698	0.0390805	GO:0000003	P	reproduction
OS01G0141000	LOC_Os01g04800	5134.96	1.45068	0.638467	0.00665698	0.0390805	GO:0009791	P	post-embryonic development
OS01G0141000	LOC_Os01g04800	5134.96	1.45068	0.638467	0.00665698	0.0390805	GO:0009628	P	response to abiotic stimulus
OS01G0141000	LOC_Os01g04800	5134.96	1.45068	0.638467	0.00665698	0.0390805	GO:0009536	C	plastid
OS01G0141600	LOC_Os01g04860	125.416	1.55448	0.632685	0.00351606	0.0238529	GO:0003674	F	molecular_function
OS01G0141600	LOC_Os01g04860	125.416	1.55448	0.632685	0.00351606	0.0238529	GO:0005575	C	cellular_component
OS01G0141600	LOC_Os01g04860	125.416	1.55448	0.632685	0.00351606	0.0238529	GO:0008150	P	biological_process
OS01G0142100	LOC_Os01g04900	198.281	1.21439	0.487766	0.00518321	0.032358	GO:0016020	C	membrane
OS01G0142100	LOC_Os01g04900	198.281	1.21439	0.487766	0.00518321	0.032358	GO:0009536	C	plastid
OS01G0142100	LOC_Os01g04900	198.281	1.21439	0.487766	0.00518321	0.032358	GO:0009579	C	thylakoid
OS01G0142100	LOC_Os01g04900	198.281	1.21439	0.487766	0.00518321	0.032358	GO:0019538	P	protein metabolic process
OS01G0142100	LOC_Os01g04900	198.281	1.21439	0.487766	0.00518321	0.032358	GO:0016787	F	hydrolase activity
OS01G0142100	LOC_Os01g04900	198.281	1.21439	0.487766	0.00518321	0.032358	GO:0016020	C	membrane
OS01G0142100	LOC_Os01g04900	198.281	1.21439	0.487766	0.00518321	0.032358	GO:0009536	C	plastid
OS01G0142100	LOC_Os01g04900	198.281	1.21439	0.487766	0.00518321	0.032358	GO:0009579	C	thylakoid
OS01G0142100	LOC_Os01g04900	198.281	1.21439	0.487766	0.00518321	0.032358	GO:0019538	P	protein metabolic process
OS01G0142100	LOC_Os01g04900	198.281	1.21439	0.487766	0.00518321	0.032358	GO:0016787	F	hydrolase activity
OS01G0142100	LOC_Os01g04900	198.281	1.21439	0.487766	0.00518321	0.032358	GO:0016020	C	membrane
OS01G0142100	LOC_Os01g04900	198.281	1.21439	0.487766	0.00518321	0.032358	GO:0009536	C	plastid
OS01G0142100	LOC_Os01g04900	198.281	1.21439	0.487766	0.00518321	0.032358	GO:0009579	C	thylakoid
OS01G0142100	LOC_Os01g04900	198.281	1.21439	0.487766	0.00518321	0.032358	GO:0019538	P	protein metabolic process
OS01G0142100	LOC_Os01g04900	198.281	1.21439	0.487766	0.00518321	0.032358	GO:0016787	F	hydrolase activity
OS01G0142300	LOC_Os01g04920	585.519	-1.09151	0.46468	0.00842684	0.0465539	GO:0009991	P	response to extracellular stimulus
OS01G0142300	LOC_Os01g04920	585.519	-1.09151	0.46468	0.00842684	0.0465539	GO:0007154	P	cell communication
OS01G0142300	LOC_Os01g04920	585.519	-1.09151	0.46468	0.00842684	0.0465539	GO:0006950	P	response to stress
OS01G0142300	LOC_Os01g04920	585.519	-1.09151	0.46468	0.00842684	0.0465539	GO:0009058	P	biosynthetic process
OS01G0142300	LOC_Os01g04920	585.519	-1.09151	0.46468	0.00842684	0.0465539	GO:0009987	P	cellular process
OS01G0142300	LOC_Os01g04920	585.519	-1.09151	0.46468	0.00842684	0.0465539	GO:0006629	P	lipid metabolic process
OS01G0142300	LOC_Os01g04920	585.519	-1.09151	0.46468	0.00842684	0.0465539	GO:0008152	P	metabolic process
OS01G0142300	LOC_Os01g04920	585.519	-1.09151	0.46468	0.00842684	0.0465539	GO:0016740	F	transferase activity
OS01G0142300	LOC_Os01g04920	585.519	-1.09151	0.46468	0.00842684	0.0465539	GO:0009536	C	plastid
OS01G0142300	LOC_Os01g04920	585.519	-1.09151	0.46468	0.00842684	0.0465539	GO:0009991	P	response to extracellular stimulus
OS01G0142300	LOC_Os01g04920	585.519	-1.09151	0.46468	0.00842684	0.0465539	GO:0007154	P	cell communication
OS01G0142300	LOC_Os01g04920	585.519	-1.09151	0.46468	0.00842684	0.0465539	GO:0006950	P	response to stress
OS01G0142300	LOC_Os01g04920	585.519	-1.09151	0.46468	0.00842684	0.0465539	GO:0009058	P	biosynthetic process
OS01G0142300	LOC_Os01g04920	585.519	-1.09151	0.46468	0.00842684	0.0465539	GO:0009987	P	cellular process
OS01G0142300	LOC_Os01g04920	585.519	-1.09151	0.46468	0.00842684	0.0465539	GO:0006629	P	lipid metabolic process
OS01G0142300	LOC_Os01g04920	585.519	-1.09151	0.46468	0.00842684	0.0465539	GO:0008152	P	metabolic process
OS01G0142300	LOC_Os01g04920	585.519	-1.09151	0.46468	0.00842684	0.0465539	GO:0016740	F	transferase activity
OS01G0142300	LOC_Os01g04920	585.519	-1.09151	0.46468	0.00842684	0.0465539	GO:0009536	C	plastid
OS01G0142300	LOC_Os01g04920	585.519	-1.09151	0.46468	0.00842684	0.0465539	GO:0009991	P	response to extracellular stimulus
OS01G0142300	LOC_Os01g04920	585.519	-1.09151	0.46468	0.00842684	0.0465539	GO:0007154	P	cell communication
OS01G0142300	LOC_Os01g04920	585.519	-1.09151	0.46468	0.00842684	0.0465539	GO:0006950	P	response to stress
OS01G0142300	LOC_Os01g04920	585.519	-1.09151	0.46468	0.00842684	0.0465539	GO:0009058	P	biosynthetic process
OS01G0142300	LOC_Os01g04920	585.519	-1.09151	0.46468	0.00842684	0.0465539	GO:0009987	P	cellular process
OS01G0142300	LOC_Os01g04920	585.519	-1.09151	0.46468	0.00842684	0.0465539	GO:0006629	P	lipid metabolic process
OS01G0142300	LOC_Os01g04920	585.519	-1.09151	0.46468	0.00842684	0.0465539	GO:0008152	P	metabolic process
OS01G0142300	LOC_Os01g04920	585.519	-1.09151	0.46468	0.00842684	0.0465539	GO:0016740	F	transferase activity
OS01G0142300	LOC_Os01g04920	585.519	-1.09151	0.46468	0.00842684	0.0465539	GO:0009536	C	plastid
OS01G0143100	LOC_Os01g04990	756.285	0.538521	0.211532	0.00918153	0.0495198	GO:0006810	P	transport
OS01G0143100	LOC_Os01g04990	756.285	0.538521	0.211532	0.00918153	0.0495198	GO:0016020	C	membrane
OS01G0143100	LOC_Os01g04990	756.285	0.538521	0.211532	0.00918153	0.0495198	GO:0009987	P	cellular process
OS01G0143100	LOC_Os01g04990	756.285	0.538521	0.211532	0.00918153	0.0495198	GO:0005739	C	mitochondrion
OS01G0143100	LOC_Os01g04990	756.285	0.538521	0.211532	0.00918153	0.0495198	GO:0005488	F	binding
OS01G0143100	LOC_Os01g04990	756.285	0.538521	0.211532	0.00918153	0.0495198	GO:0005215	F	transporter activity
OS01G0143100	LOC_Os01g04990	756.285	0.538521	0.211532	0.00918153	0.0495198	GO:0006810	P	transport
OS01G0143100	LOC_Os01g04990	756.285	0.538521	0.211532	0.00918153	0.0495198	GO:0016020	C	membrane
OS01G0143100	LOC_Os01g04990	756.285	0.538521	0.211532	0.00918153	0.0495198	GO:0009987	P	cellular process
OS01G0143100	LOC_Os01g04990	756.285	0.538521	0.211532	0.00918153	0.0495198	GO:0005739	C	mitochondrion
OS01G0143100	LOC_Os01g04990	756.285	0.538521	0.211532	0.00918153	0.0495198	GO:0005488	F	binding
OS01G0143100	LOC_Os01g04990	756.285	0.538521	0.211532	0.00918153	0.0495198	GO:0005215	F	transporter activity
OS01G0143400	LOC_Os01g05020	6.95227	3.54165	1.46487	0.00114915	0.00971827	GO:0003674	F	molecular_function
OS01G0143400	LOC_Os01g05020	6.95227	3.54165	1.46487	0.00114915	0.00971827	GO:0008150	P	biological_process
OS01G0143400	LOC_Os01g05020	6.95227	3.54165	1.46487	0.00114915	0.00971827	GO:0005886	C	plasma membrane
OS01G0143800	LOC_Os01g05060	527.058	0.866341	0.301251	0.00254666	0.0184708	GO:0003674	F	molecular_function
OS01G0143800	LOC_Os01g05060	527.058	0.866341	0.301251	0.00254666	0.0184708	GO:0005739	C	mitochondrion
OS01G0143800	LOC_Os01g05060	527.058	0.866341	0.301251	0.00254666	0.0184708	GO:0008150	P	biological_process
OS01G0143900	LOC_Os01g05064	243.635	1.43501	0.448978	0.000452968	0.00450473	None	None	None
OS01G0144100	LOC_Os01g05080	68.0022	4.56699	0.876218	1.26e-08	3.17e-07	GO:0003674	F	molecular_function
OS01G0144100	LOC_Os01g05080	68.0022	4.56699	0.876218	1.26e-08	3.17e-07	GO:0009579	C	thylakoid
OS01G0144100	LOC_Os01g05080	68.0022	4.56699	0.876218	1.26e-08	3.17e-07	GO:0016020	C	membrane
OS01G0144100	LOC_Os01g05080	68.0022	4.56699	0.876218	1.26e-08	3.17e-07	GO:0009536	C	plastid
OS01G0144100	LOC_Os01g05080	68.0022	4.56699	0.876218	1.26e-08	3.17e-07	GO:0005515	F	protein binding
OS01G0144100	LOC_Os01g05080	68.0022	4.56699	0.876218	1.26e-08	3.17e-07	GO:0003674	F	molecular_function
OS01G0144100	LOC_Os01g05080	68.0022	4.56699	0.876218	1.26e-08	3.17e-07	GO:0009579	C	thylakoid
OS01G0144100	LOC_Os01g05080	68.0022	4.56699	0.876218	1.26e-08	3.17e-07	GO:0016020	C	membrane
OS01G0144100	LOC_Os01g05080	68.0022	4.56699	0.876218	1.26e-08	3.17e-07	GO:0009536	C	plastid
OS01G0144100	LOC_Os01g05080	68.0022	4.56699	0.876218	1.26e-08	3.17e-07	GO:0005515	F	protein binding
OS01G0144200	LOC_Os01g05090	448.627	6.57658	0.739658	4.09e-20	3.61e-18	None	None	None
OS01G0144300	LOC_Os01g05100	10.4128	2.92321	0.748341	1.19e-05	0.000182624	None	None	None
OS01G0144900	None	169.638	2.20308	0.221123	4.13e-24	5.83e-22	None	None	None
OS01G0145200	LOC_Os01g05180	114.233	1.65672	0.463403	9.05e-05	0.00111209	None	None	None
OS01G0145600	None	103.168	2.69212	0.499092	8.63e-09	2.21e-07	None	None	None
OS01G0147250	None	116.083	-1.13806	0.295319	5.58e-05	0.000725748	None	None	None
OS01G0149200	LOC_Os01g05585	215.405	-6.59477	0.496027	1.23e-41	6.65e-39	GO:0019725	P	cellular homeostasis
OS01G0149200	LOC_Os01g05585	215.405	-6.59477	0.496027	1.23e-41	6.65e-39	GO:0005488	F	binding
OS01G0149400	LOC_Os01g05610	422.264	1.69241	0.305898	8.5e-09	2.17e-07	GO:0003677	F	DNA binding
OS01G0149400	LOC_Os01g05610	422.264	1.69241	0.305898	8.5e-09	2.17e-07	GO:0005634	C	nucleus
OS01G0149400	LOC_Os01g05610	422.264	1.69241	0.305898	8.5e-09	2.17e-07	GO:0005515	F	protein binding
OS01G0149400	LOC_Os01g05610	422.264	1.69241	0.305898	8.5e-09	2.17e-07	GO:0005730	C	nucleolus
OS01G0149400	LOC_Os01g05610	422.264	1.69241	0.305898	8.5e-09	2.17e-07	GO:0016043	P	cellular component organization
OS01G0149400	LOC_Os01g05610	422.264	1.69241	0.305898	8.5e-09	2.17e-07	GO:0006259	P	DNA metabolic process
OS01G0149500	LOC_Os01g05620	33.6965	-1.27197	0.552385	0.00750226	0.0427787	GO:0000166	F	nucleotide binding
OS01G0149500	LOC_Os01g05620	33.6965	-1.27197	0.552385	0.00750226	0.0427787	GO:0006950	P	response to stress
OS01G0149600	LOC_Os01g05630	756.889	-1.87096	0.177892	1.86e-26	3.22e-24	GO:0003677	F	DNA binding
OS01G0149600	LOC_Os01g05630	756.889	-1.87096	0.177892	1.86e-26	3.22e-24	GO:0005634	C	nucleus
OS01G0149600	LOC_Os01g05630	756.889	-1.87096	0.177892	1.86e-26	3.22e-24	GO:0005515	F	protein binding
OS01G0149600	LOC_Os01g05630	756.889	-1.87096	0.177892	1.86e-26	3.22e-24	GO:0005730	C	nucleolus
OS01G0149600	LOC_Os01g05630	756.889	-1.87096	0.177892	1.86e-26	3.22e-24	GO:0016043	P	cellular component organization
OS01G0149600	LOC_Os01g05630	756.889	-1.87096	0.177892	1.86e-26	3.22e-24	GO:0006259	P	DNA metabolic process
OS01G0149800	LOC_Os01g05650	3381.81	-0.726604	0.261096	0.00381146	0.0254327	GO:0019725	P	cellular homeostasis
OS01G0149800	LOC_Os01g05650	3381.81	-0.726604	0.261096	0.00381146	0.0254327	GO:0005488	F	binding
OS01G0150950	LOC_Os01g05770	4.35232	-5.6163	2.72035	0.000203986	0.00227907	None	None	None
OS01G0152000	LOC_Os01g05870	54.7817	-1.48317	0.580611	0.0029726	0.0208268	GO:0007165	P	signal transduction
OS01G0152000	LOC_Os01g05870	54.7817	-1.48317	0.580611	0.0029726	0.0208268	GO:0016301	F	kinase activity
OS01G0152000	LOC_Os01g05870	54.7817	-1.48317	0.580611	0.0029726	0.0208268	GO:0000166	F	nucleotide binding
OS01G0152000	LOC_Os01g05870	54.7817	-1.48317	0.580611	0.0029726	0.0208268	GO:0006464	P	protein modification process
OS01G0152000	LOC_Os01g05870	54.7817	-1.48317	0.580611	0.0029726	0.0208268	GO:0005886	C	plasma membrane
OS01G0152300	LOC_Os01g05900	605.217	-2.04024	0.187444	2.73e-28	5.66e-26	GO:0003677	F	DNA binding
OS01G0152300	LOC_Os01g05900	605.217	-2.04024	0.187444	2.73e-28	5.66e-26	GO:0005634	C	nucleus
OS01G0152300	LOC_Os01g05900	605.217	-2.04024	0.187444	2.73e-28	5.66e-26	GO:0005515	F	protein binding
OS01G0152300	LOC_Os01g05900	605.217	-2.04024	0.187444	2.73e-28	5.66e-26	GO:0005730	C	nucleolus
OS01G0152300	LOC_Os01g05900	605.217	-2.04024	0.187444	2.73e-28	5.66e-26	GO:0016043	P	cellular component organization
OS01G0152300	LOC_Os01g05900	605.217	-2.04024	0.187444	2.73e-28	5.66e-26	GO:0006259	P	DNA metabolic process
OS01G0152600	LOC_Os01g05940	237.287	-1.12794	0.291162	5.14e-05	0.000674553	GO:0007165	P	signal transduction
OS01G0152600	LOC_Os01g05940	237.287	-1.12794	0.291162	5.14e-05	0.000674553	GO:0016301	F	kinase activity
OS01G0152600	LOC_Os01g05940	237.287	-1.12794	0.291162	5.14e-05	0.000674553	GO:0000166	F	nucleotide binding
OS01G0152600	LOC_Os01g05940	237.287	-1.12794	0.291162	5.14e-05	0.000674553	GO:0006464	P	protein modification process
OS01G0152600	LOC_Os01g05940	237.287	-1.12794	0.291162	5.14e-05	0.000674553	GO:0005886	C	plasma membrane
OS01G0154950	None	3.2896	5.49479	2.81477	0.00049449	0.00485155	None	None	None
OS01G0158200	LOC_Os01g06490	582.378	1.39898	0.199489	9.09e-13	3.85e-11	GO:0019538	P	protein metabolic process
OS01G0158200	LOC_Os01g06490	582.378	1.39898	0.199489	9.09e-13	3.85e-11	GO:0016787	F	hydrolase activity
OS01G0158200	LOC_Os01g06490	582.378	1.39898	0.199489	9.09e-13	3.85e-11	GO:0005773	C	vacuole
OS01G0158200	LOC_Os01g06490	582.378	1.39898	0.199489	9.09e-13	3.85e-11	GO:0019538	P	protein metabolic process
OS01G0158200	LOC_Os01g06490	582.378	1.39898	0.199489	9.09e-13	3.85e-11	GO:0016787	F	hydrolase activity
OS01G0158200	LOC_Os01g06490	582.378	1.39898	0.199489	9.09e-13	3.85e-11	GO:0005773	C	vacuole
OS01G0158500	LOC_Os01g06510	106.178	12.0235	3.05379	2.03e-22	2.33e-20	GO:0008152	P	metabolic process
OS01G0158500	LOC_Os01g06510	106.178	12.0235	3.05379	2.03e-22	2.33e-20	GO:0000166	F	nucleotide binding
OS01G0158500	LOC_Os01g06510	106.178	12.0235	3.05379	2.03e-22	2.33e-20	GO:0003824	F	catalytic activity
OS01G0158500	LOC_Os01g06510	106.178	12.0235	3.05379	2.03e-22	2.33e-20	GO:0005739	C	mitochondrion
OS01G0158500	LOC_Os01g06510	106.178	12.0235	3.05379	2.03e-22	2.33e-20	GO:0006412	P	translation
OS01G0158500	LOC_Os01g06510	106.178	12.0235	3.05379	2.03e-22	2.33e-20	GO:0006139	P	nucleobase, nucleoside, nucleotide and nucleic acid metabolic process
OS01G0158500	LOC_Os01g06510	106.178	12.0235	3.05379	2.03e-22	2.33e-20	GO:0000003	P	reproduction
OS01G0158500	LOC_Os01g06510	106.178	12.0235	3.05379	2.03e-22	2.33e-20	GO:0009791	P	post-embryonic development
OS01G0158500	LOC_Os01g06510	106.178	12.0235	3.05379	2.03e-22	2.33e-20	GO:0009790	P	embryo development
OS01G0158500	LOC_Os01g06510	106.178	12.0235	3.05379	2.03e-22	2.33e-20	GO:0009536	C	plastid
OS01G0158566	None	19.8265	9.21888	2.80328	1.24e-12	5.14e-11	None	None	None
OS01G0158600	LOC_Os01g06520	28.8081	9.86382	2.85402	7.09e-15	3.77e-13	GO:0016020	C	membrane
OS01G0158600	LOC_Os01g06520	28.8081	9.86382	2.85402	7.09e-15	3.77e-13	GO:0007165	P	signal transduction
OS01G0158600	LOC_Os01g06520	28.8081	9.86382	2.85402	7.09e-15	3.77e-13	GO:0006950	P	response to stress
OS01G0162200	LOC_Os01g06870	3.60092	4.67344	3.77893	0.00562823	0.0343818	GO:0005623	C	cell
OS01G0162200	LOC_Os01g06870	3.60092	4.67344	3.77893	0.00562823	0.0343818	GO:0008152	P	metabolic process
OS01G0162200	LOC_Os01g06870	3.60092	4.67344	3.77893	0.00562823	0.0343818	GO:0009987	P	cellular process
OS01G0162200	LOC_Os01g06870	3.60092	4.67344	3.77893	0.00562823	0.0343818	GO:0007165	P	signal transduction
OS01G0162200	LOC_Os01g06870	3.60092	4.67344	3.77893	0.00562823	0.0343818	GO:0006950	P	response to stress
OS01G0162200	LOC_Os01g06870	3.60092	4.67344	3.77893	0.00562823	0.0343818	GO:0016301	F	kinase activity
OS01G0162500	LOC_Os01g06890	25.115	1.47716	0.492034	0.000832783	0.00744009	GO:0005623	C	cell
OS01G0162500	LOC_Os01g06890	25.115	1.47716	0.492034	0.000832783	0.00744009	GO:0008152	P	metabolic process
OS01G0162500	LOC_Os01g06890	25.115	1.47716	0.492034	0.000832783	0.00744009	GO:0009987	P	cellular process
OS01G0162500	LOC_Os01g06890	25.115	1.47716	0.492034	0.000832783	0.00744009	GO:0007165	P	signal transduction
OS01G0162500	LOC_Os01g06890	25.115	1.47716	0.492034	0.000832783	0.00744009	GO:0006950	P	response to stress
OS01G0162500	LOC_Os01g06890	25.115	1.47716	0.492034	0.000832783	0.00744009	GO:0016301	F	kinase activity
OS01G0162701	None	28.9335	9.85173	2.88978	2.2e-13	9.92e-12	None	None	None
OS01G0162900	None	20.42	8.89606	3.12633	8.95e-07	1.71e-05	None	None	None
OS01G0163000	LOC_Os01g06920	17.4086	4.00007	0.940951	1.85e-06	3.31e-05	GO:0005623	C	cell
OS01G0163000	LOC_Os01g06920	17.4086	4.00007	0.940951	1.85e-06	3.31e-05	GO:0007165	P	signal transduction
OS01G0163000	LOC_Os01g06920	17.4086	4.00007	0.940951	1.85e-06	3.31e-05	GO:0006950	P	response to stress
OS01G0164300	LOC_Os01g07060	8.14207	4.18072	1.12735	3e-05	0.000417978	GO:0005623	C	cell
OS01G0164300	LOC_Os01g07060	8.14207	4.18072	1.12735	3e-05	0.000417978	GO:0003674	F	molecular_function
OS01G0164300	LOC_Os01g07060	8.14207	4.18072	1.12735	3e-05	0.000417978	GO:0008150	P	biological_process
OS01G0165800	LOC_Os01g07170	467.362	-1.16251	0.264518	5.12e-06	8.4e-05	GO:0016043	P	cellular component organization
OS01G0165800	LOC_Os01g07170	467.362	-1.16251	0.264518	5.12e-06	8.4e-05	GO:0007049	P	cell cycle
OS01G0165800	LOC_Os01g07170	467.362	-1.16251	0.264518	5.12e-06	8.4e-05	GO:0003677	F	DNA binding
OS01G0165800	LOC_Os01g07170	467.362	-1.16251	0.264518	5.12e-06	8.4e-05	GO:0005634	C	nucleus
OS01G0166300	LOC_Os01g07212	324.662	-0.926414	0.254763	0.000166906	0.00190472	GO:0005575	C	cellular_component
OS01G0166300	LOC_Os01g07212	324.662	-0.926414	0.254763	0.000166906	0.00190472	GO:0008152	P	metabolic process
OS01G0166300	LOC_Os01g07212	324.662	-0.926414	0.254763	0.000166906	0.00190472	GO:0009058	P	biosynthetic process
OS01G0166300	LOC_Os01g07212	324.662	-0.926414	0.254763	0.000166906	0.00190472	GO:0006464	P	protein modification process
OS01G0166300	LOC_Os01g07212	324.662	-0.926414	0.254763	0.000166906	0.00190472	GO:0003676	F	nucleic acid binding
OS01G0166300	LOC_Os01g07212	324.662	-0.926414	0.254763	0.000166906	0.00190472	GO:0004518	F	nuclease activity
OS01G0166300	LOC_Os01g07212	324.662	-0.926414	0.254763	0.000166906	0.00190472	GO:0016787	F	hydrolase activity
OS01G0166700	LOC_Os01g07250	943.647	1.62355	0.405343	1.82e-05	0.000268305	GO:0003674	F	molecular_function
OS01G0166700	LOC_Os01g07250	943.647	1.62355	0.405343	1.82e-05	0.000268305	GO:0006629	P	lipid metabolic process
OS01G0166700	LOC_Os01g07250	943.647	1.62355	0.405343	1.82e-05	0.000268305	GO:0005773	C	vacuole
OS01G0168100	LOC_Os01g07370	3456.69	-1.73656	0.615525	0.000888034	0.00785606	None	None	None
OS01G0168800	LOC_Os01g07420	116.895	2.66982	0.414548	1.51e-11	5.53e-10	GO:0005575	C	cellular_component
OS01G0168800	LOC_Os01g07420	116.895	2.66982	0.414548	1.51e-11	5.53e-10	GO:0008152	P	metabolic process
OS01G0168800	LOC_Os01g07420	116.895	2.66982	0.414548	1.51e-11	5.53e-10	GO:0016787	F	hydrolase activity
OS01G0168800	LOC_Os01g07420	116.895	2.66982	0.414548	1.51e-11	5.53e-10	GO:0008150	P	biological_process
OS01G0169800	LOC_Os01g07500	959.232	-1.74643	0.573737	0.000496089	0.0048644	GO:0016740	F	transferase activity
OS01G0169800	LOC_Os01g07500	959.232	-1.74643	0.573737	0.000496089	0.0048644	GO:0009628	P	response to abiotic stimulus
OS01G0169800	LOC_Os01g07500	959.232	-1.74643	0.573737	0.000496089	0.0048644	GO:0009606	P	tropism
OS01G0169800	LOC_Os01g07500	959.232	-1.74643	0.573737	0.000496089	0.0048644	GO:0009719	P	response to endogenous stimulus
OS01G0169800	LOC_Os01g07500	959.232	-1.74643	0.573737	0.000496089	0.0048644	GO:0007275	P	multicellular organismal development
OS01G0169800	LOC_Os01g07500	959.232	-1.74643	0.573737	0.000496089	0.0048644	GO:0005623	C	cell
OS01G0169800	LOC_Os01g07500	959.232	-1.74643	0.573737	0.000496089	0.0048644	GO:0008150	P	biological_process
OS01G0169800	LOC_Os01g07500	959.232	-1.74643	0.573737	0.000496089	0.0048644	GO:0008152	P	metabolic process
OS01G0169800	LOC_Os01g07500	959.232	-1.74643	0.573737	0.000496089	0.0048644	GO:0000003	P	reproduction
OS01G0169800	LOC_Os01g07500	959.232	-1.74643	0.573737	0.000496089	0.0048644	GO:0009791	P	post-embryonic development
OS01G0169800	LOC_Os01g07500	959.232	-1.74643	0.573737	0.000496089	0.0048644	GO:0009790	P	embryo development
OS01G0169800	LOC_Os01g07500	959.232	-1.74643	0.573737	0.000496089	0.0048644	GO:0009908	P	flower development
OS01G0169800	LOC_Os01g07500	959.232	-1.74643	0.573737	0.000496089	0.0048644	GO:0009058	P	biosynthetic process
OS01G0169800	LOC_Os01g07500	959.232	-1.74643	0.573737	0.000496089	0.0048644	GO:0009987	P	cellular process
OS01G0169800	LOC_Os01g07500	959.232	-1.74643	0.573737	0.000496089	0.0048644	GO:0003824	F	catalytic activity
OS01G0169800	LOC_Os01g07500	959.232	-1.74643	0.573737	0.000496089	0.0048644	GO:0009653	P	anatomical structure morphogenesis
OS01G0169800	LOC_Os01g07500	959.232	-1.74643	0.573737	0.000496089	0.0048644	GO:0030154	P	cell differentiation
OS01G0170000	LOC_Os01g07530	351.053	-2.78674	1.7754	0.00457898	0.0294059	GO:0009058	P	biosynthetic process
OS01G0170000	LOC_Os01g07530	351.053	-2.78674	1.7754	0.00457898	0.0294059	GO:0005975	P	carbohydrate metabolic process
OS01G0170000	LOC_Os01g07530	351.053	-2.78674	1.7754	0.00457898	0.0294059	GO:0009987	P	cellular process
OS01G0170000	LOC_Os01g07530	351.053	-2.78674	1.7754	0.00457898	0.0294059	GO:0008152	P	metabolic process
OS01G0170000	LOC_Os01g07530	351.053	-2.78674	1.7754	0.00457898	0.0294059	GO:0006950	P	response to stress
OS01G0170000	LOC_Os01g07530	351.053	-2.78674	1.7754	0.00457898	0.0294059	GO:0009628	P	response to abiotic stimulus
OS01G0170000	LOC_Os01g07530	351.053	-2.78674	1.7754	0.00457898	0.0294059	GO:0016740	F	transferase activity
OS01G0170000	LOC_Os01g07530	351.053	-2.78674	1.7754	0.00457898	0.0294059	GO:0009719	P	response to endogenous stimulus
OS01G0170000	LOC_Os01g07530	351.053	-2.78674	1.7754	0.00457898	0.0294059	GO:0016787	F	hydrolase activity
OS01G0170000	LOC_Os01g07530	351.053	-2.78674	1.7754	0.00457898	0.0294059	GO:0009536	C	plastid
OS01G0170051	None	451.55	-2.38037	2.32542	0.00929839	0.0499622	None	None	None
OS01G0170500	LOC_Os01g07570	2564.02	-0.985592	0.350144	0.0027857	0.0198192	GO:0005623	C	cell
OS01G0170500	LOC_Os01g07570	2564.02	-0.985592	0.350144	0.0027857	0.0198192	GO:0003674	F	molecular_function
OS01G0170500	LOC_Os01g07570	2564.02	-0.985592	0.350144	0.0027857	0.0198192	GO:0008150	P	biological_process
OS01G0173600	LOC_Os01g07850	2244.63	3.57555	0.452267	2.4e-16	1.47e-14	GO:0003824	F	catalytic activity
OS01G0173600	LOC_Os01g07850	2244.63	3.57555	0.452267	2.4e-16	1.47e-14	GO:0005975	P	carbohydrate metabolic process
OS01G0173900	LOC_Os01g07870	2782.36	-1.45011	0.654963	0.00689788	0.0401306	GO:0006810	P	transport
OS01G0173900	LOC_Os01g07870	2782.36	-1.45011	0.654963	0.00689788	0.0401306	GO:0009987	P	cellular process
OS01G0173900	LOC_Os01g07870	2782.36	-1.45011	0.654963	0.00689788	0.0401306	GO:0005576	C	extracellular region
OS01G0173900	LOC_Os01g07870	2782.36	-1.45011	0.654963	0.00689788	0.0401306	GO:0005575	C	cellular_component
OS01G0173900	LOC_Os01g07870	2782.36	-1.45011	0.654963	0.00689788	0.0401306	GO:0016787	F	hydrolase activity
OS01G0173900	LOC_Os01g07870	2782.36	-1.45011	0.654963	0.00689788	0.0401306	GO:0005215	F	transporter activity
OS01G0173900	LOC_Os01g07870	2782.36	-1.45011	0.654963	0.00689788	0.0401306	GO:0016020	C	membrane
OS01G0173900	LOC_Os01g07870	2782.36	-1.45011	0.654963	0.00689788	0.0401306	GO:0005773	C	vacuole
OS01G0173900	LOC_Os01g07870	2782.36	-1.45011	0.654963	0.00689788	0.0401306	GO:0009056	P	catabolic process
OS01G0173900	LOC_Os01g07870	2782.36	-1.45011	0.654963	0.00689788	0.0401306	GO:0006139	P	nucleobase, nucleoside, nucleotide and nucleic acid metabolic process
OS01G0174900	LOC_Os01g07950	335.038	1.2751	0.39124	0.000441697	0.00441092	GO:0005488	F	binding
OS01G0174900	LOC_Os01g07950	335.038	1.2751	0.39124	0.000441697	0.00441092	GO:0005739	C	mitochondrion
OS01G0174900	LOC_Os01g07950	335.038	1.2751	0.39124	0.000441697	0.00441092	GO:0019725	P	cellular homeostasis
OS01G0175400	LOC_Os01g08000	104.092	-1.63572	0.35468	1.01e-06	1.91e-05	GO:0005575	C	cellular_component
OS01G0175400	LOC_Os01g08000	104.092	-1.63572	0.35468	1.01e-06	1.91e-05	GO:0008150	P	biological_process
OS01G0175400	LOC_Os01g08000	104.092	-1.63572	0.35468	1.01e-06	1.91e-05	GO:0005488	F	binding
OS01G0175600	LOC_Os01g08020	3.44541	4.7589	3.62107	0.00508129	0.0318282	GO:0006810	P	transport
OS01G0175600	LOC_Os01g08020	3.44541	4.7589	3.62107	0.00508129	0.0318282	GO:0009987	P	cellular process
OS01G0175600	LOC_Os01g08020	3.44541	4.7589	3.62107	0.00508129	0.0318282	GO:0009991	P	response to extracellular stimulus
OS01G0175600	LOC_Os01g08020	3.44541	4.7589	3.62107	0.00508129	0.0318282	GO:0007154	P	cell communication
OS01G0175600	LOC_Os01g08020	3.44541	4.7589	3.62107	0.00508129	0.0318282	GO:0005215	F	transporter activity
OS01G0175600	LOC_Os01g08020	3.44541	4.7589	3.62107	0.00508129	0.0318282	GO:0005886	C	plasma membrane
OS01G0175850	None	156.841	-4.04785	1.1952	3.41e-05	0.000467465	None	None	None
OS01G0177500	None	78.4899	-1.25381	0.525457	0.00631516	0.0375982	None	None	None
OS01G0180400	LOC_Os01g08520	488.824	-0.978654	0.312377	0.000952922	0.00831862	GO:0003674	F	molecular_function
OS01G0183000	LOC_Os01g08760	529.437	-0.625482	0.243377	0.00789139	0.0443295	GO:0006950	P	response to stress
OS01G0183000	LOC_Os01g08760	529.437	-0.625482	0.243377	0.00789139	0.0443295	GO:0008152	P	metabolic process
OS01G0183000	LOC_Os01g08760	529.437	-0.625482	0.243377	0.00789139	0.0443295	GO:0009987	P	cellular process
OS01G0183000	LOC_Os01g08760	529.437	-0.625482	0.243377	0.00789139	0.0443295	GO:0009058	P	biosynthetic process
OS01G0183000	LOC_Os01g08760	529.437	-0.625482	0.243377	0.00789139	0.0443295	GO:0006629	P	lipid metabolic process
OS01G0183000	LOC_Os01g08760	529.437	-0.625482	0.243377	0.00789139	0.0443295	GO:0016301	F	kinase activity
OS01G0183600	LOC_Os01g08810	11.5506	4.77065	1.07456	1.59e-06	2.88e-05	GO:0005623	C	cell
OS01G0183600	LOC_Os01g08810	11.5506	4.77065	1.07456	1.59e-06	2.88e-05	GO:0003674	F	molecular_function
OS01G0183600	LOC_Os01g08810	11.5506	4.77065	1.07456	1.59e-06	2.88e-05	GO:0005488	F	binding
OS01G0183600	LOC_Os01g08810	11.5506	4.77065	1.07456	1.59e-06	2.88e-05	GO:0003824	F	catalytic activity
OS01G0183600	LOC_Os01g08810	11.5506	4.77065	1.07456	1.59e-06	2.88e-05	GO:0008152	P	metabolic process
OS01G0183850	None	290.978	-4.1447	0.992263	1.67e-06	3.01e-05	None	None	None
OS01G0184900	LOC_Os01g08970	4085.8	-0.414795	0.155108	0.0067184	0.0393379	GO:0005634	C	nucleus
OS01G0184900	LOC_Os01g08970	4085.8	-0.414795	0.155108	0.0067184	0.0393379	GO:0009058	P	biosynthetic process
OS01G0184900	LOC_Os01g08970	4085.8	-0.414795	0.155108	0.0067184	0.0393379	GO:0006139	P	nucleobase, nucleoside, nucleotide and nucleic acid metabolic process
OS01G0184900	LOC_Os01g08970	4085.8	-0.414795	0.155108	0.0067184	0.0393379	GO:0005654	C	nucleoplasm
OS01G0184900	LOC_Os01g08970	4085.8	-0.414795	0.155108	0.0067184	0.0393379	GO:0003700	F	sequence-specific DNA binding transcription factor activity
OS01G0184900	LOC_Os01g08970	4085.8	-0.414795	0.155108	0.0067184	0.0393379	GO:0000003	P	reproduction
OS01G0184900	LOC_Os01g08970	4085.8	-0.414795	0.155108	0.0067184	0.0393379	GO:0009791	P	post-embryonic development
OS01G0184900	LOC_Os01g08970	4085.8	-0.414795	0.155108	0.0067184	0.0393379	GO:0005634	C	nucleus
OS01G0184900	LOC_Os01g08970	4085.8	-0.414795	0.155108	0.0067184	0.0393379	GO:0009058	P	biosynthetic process
OS01G0184900	LOC_Os01g08970	4085.8	-0.414795	0.155108	0.0067184	0.0393379	GO:0006139	P	nucleobase, nucleoside, nucleotide and nucleic acid metabolic process
OS01G0184900	LOC_Os01g08970	4085.8	-0.414795	0.155108	0.0067184	0.0393379	GO:0005654	C	nucleoplasm
OS01G0184900	LOC_Os01g08970	4085.8	-0.414795	0.155108	0.0067184	0.0393379	GO:0003700	F	sequence-specific DNA binding transcription factor activity
OS01G0184900	LOC_Os01g08970	4085.8	-0.414795	0.155108	0.0067184	0.0393379	GO:0000003	P	reproduction
OS01G0184900	LOC_Os01g08970	4085.8	-0.414795	0.155108	0.0067184	0.0393379	GO:0009791	P	post-embryonic development
OS01G0185250	None	142.325	-1.8047	0.733214	0.00251431	0.0182876	None	None	None
OS01G0185350	None	135.733	-1.85428	0.753902	0.00231275	0.0171371	None	None	None
OS01G0185400	LOC_Os01g09020	2205.31	-0.956597	0.374821	0.00551574	0.0338548	GO:0005622	C	intracellular
OS01G0185400	LOC_Os01g09020	2205.31	-0.956597	0.374821	0.00551574	0.0338548	GO:0000166	F	nucleotide binding
OS01G0186700	LOC_Os01g09200	5302.99	-1.57927	0.5927	0.00186714	0.0143482	GO:0005575	C	cellular_component
OS01G0186700	LOC_Os01g09200	5302.99	-1.57927	0.5927	0.00186714	0.0143482	GO:0008152	P	metabolic process
OS01G0186700	LOC_Os01g09200	5302.99	-1.57927	0.5927	0.00186714	0.0143482	GO:0009987	P	cellular process
OS01G0186700	LOC_Os01g09200	5302.99	-1.57927	0.5927	0.00186714	0.0143482	GO:0016301	F	kinase activity
OS01G0186700	LOC_Os01g09200	5302.99	-1.57927	0.5927	0.00186714	0.0143482	GO:0006464	P	protein modification process
OS01G0186900	LOC_Os01g09220	2322.54	-3.63153	1.7219	0.00108825	0.00928508	None	None	None
OS01G0187300	None	578.339	-0.93769	0.299115	0.000987257	0.00856543	None	None	None
OS01G0188400	LOC_Os01g09320	11074.9	-0.941893	0.346102	0.00363852	0.02453	GO:0016043	P	cellular component organization
OS01G0188400	LOC_Os01g09320	11074.9	-0.941893	0.346102	0.00363852	0.02453	GO:0009791	P	post-embryonic development
OS01G0188400	LOC_Os01g09320	11074.9	-0.941893	0.346102	0.00363852	0.02453	GO:0003824	F	catalytic activity
OS01G0188400	LOC_Os01g09320	11074.9	-0.941893	0.346102	0.00363852	0.02453	GO:0008152	P	metabolic process
OS01G0188400	LOC_Os01g09320	11074.9	-0.941893	0.346102	0.00363852	0.02453	GO:0005515	F	protein binding
OS01G0188400	LOC_Os01g09320	11074.9	-0.941893	0.346102	0.00363852	0.02453	GO:0005488	F	binding
OS01G0188400	LOC_Os01g09320	11074.9	-0.941893	0.346102	0.00363852	0.02453	GO:0009987	P	cellular process
OS01G0188400	LOC_Os01g09320	11074.9	-0.941893	0.346102	0.00363852	0.02453	GO:0009058	P	biosynthetic process
OS01G0188400	LOC_Os01g09320	11074.9	-0.941893	0.346102	0.00363852	0.02453	GO:0006629	P	lipid metabolic process
OS01G0188400	LOC_Os01g09320	11074.9	-0.941893	0.346102	0.00363852	0.02453	GO:0000003	P	reproduction
OS01G0188400	LOC_Os01g09320	11074.9	-0.941893	0.346102	0.00363852	0.02453	GO:0009790	P	embryo development
OS01G0188400	LOC_Os01g09320	11074.9	-0.941893	0.346102	0.00363852	0.02453	GO:0009536	C	plastid
OS01G0188525	None	14.1485	-1.68311	0.848004	0.00915288	0.0493825	None	None	None
OS01G0188900	LOC_Os01g09370	743.768	-7.75546	0.527197	2.66e-50	2.23e-47	GO:0005575	C	cellular_component
OS01G0188900	LOC_Os01g09370	743.768	-7.75546	0.527197	2.66e-50	2.23e-47	GO:0008150	P	biological_process
OS01G0188900	LOC_Os01g09370	743.768	-7.75546	0.527197	2.66e-50	2.23e-47	GO:0005488	F	binding
OS01G0189100	LOC_Os01g09384	8.45271	-7.05646	2.71776	7.31e-07	1.42e-05	GO:0005575	C	cellular_component
OS01G0189100	LOC_Os01g09384	8.45271	-7.05646	2.71776	7.31e-07	1.42e-05	GO:0008150	P	biological_process
OS01G0189100	LOC_Os01g09384	8.45271	-7.05646	2.71776	7.31e-07	1.42e-05	GO:0005488	F	binding
OS01G0189800	LOC_Os01g09420	95.6168	-1.15205	0.299634	5.57e-05	0.000725082	None	None	None
OS01G0190000	LOC_Os01g09430	88.9976	1.83436	0.536271	0.000128566	0.00151935	GO:0005634	C	nucleus
OS01G0190000	LOC_Os01g09430	88.9976	1.83436	0.536271	0.000128566	0.00151935	GO:0008152	P	metabolic process
OS01G0190000	LOC_Os01g09430	88.9976	1.83436	0.536271	0.000128566	0.00151935	GO:0003824	F	catalytic activity
OS01G0190300	LOC_Os01g09450	319.011	-1.72323	0.520866	0.000213247	0.00236758	GO:0009719	P	response to endogenous stimulus
OS01G0190300	LOC_Os01g09450	319.011	-1.72323	0.520866	0.000213247	0.00236758	GO:0005634	C	nucleus
OS01G0190300	LOC_Os01g09450	319.011	-1.72323	0.520866	0.000213247	0.00236758	GO:0009058	P	biosynthetic process
OS01G0190300	LOC_Os01g09450	319.011	-1.72323	0.520866	0.000213247	0.00236758	GO:0006139	P	nucleobase, nucleoside, nucleotide and nucleic acid metabolic process
OS01G0190300	LOC_Os01g09450	319.011	-1.72323	0.520866	0.000213247	0.00236758	GO:0003700	F	sequence-specific DNA binding transcription factor activity
OS01G0190300	LOC_Os01g09450	319.011	-1.72323	0.520866	0.000213247	0.00236758	GO:0009719	P	response to endogenous stimulus
OS01G0190300	LOC_Os01g09450	319.011	-1.72323	0.520866	0.000213247	0.00236758	GO:0005634	C	nucleus
OS01G0190300	LOC_Os01g09450	319.011	-1.72323	0.520866	0.000213247	0.00236758	GO:0009058	P	biosynthetic process
OS01G0190300	LOC_Os01g09450	319.011	-1.72323	0.520866	0.000213247	0.00236758	GO:0006139	P	nucleobase, nucleoside, nucleotide and nucleic acid metabolic process
OS01G0190300	LOC_Os01g09450	319.011	-1.72323	0.520866	0.000213247	0.00236758	GO:0003700	F	sequence-specific DNA binding transcription factor activity
OS01G0193900	LOC_Os01g09760	620.95	-0.727392	0.242977	0.00196915	0.0149779	GO:0003677	F	DNA binding
OS01G0193900	LOC_Os01g09760	620.95	-0.727392	0.242977	0.00196915	0.0149779	GO:0005515	F	protein binding
OS01G0193900	LOC_Os01g09760	620.95	-0.727392	0.242977	0.00196915	0.0149779	GO:0008150	P	biological_process
OS01G0195000	LOC_Os01g09850	1380.63	-1.48485	0.64632	0.00538461	0.0332809	GO:0009058	P	biosynthetic process
OS01G0195000	LOC_Os01g09850	1380.63	-1.48485	0.64632	0.00538461	0.0332809	GO:0006139	P	nucleobase, nucleoside, nucleotide and nucleic acid metabolic process
OS01G0195000	LOC_Os01g09850	1380.63	-1.48485	0.64632	0.00538461	0.0332809	GO:0005488	F	binding
OS01G0195000	LOC_Os01g09850	1380.63	-1.48485	0.64632	0.00538461	0.0332809	GO:0005622	C	intracellular
OS01G0195000	LOC_Os01g09850	1380.63	-1.48485	0.64632	0.00538461	0.0332809	GO:0003700	F	sequence-specific DNA binding transcription factor activity
OS01G0195000	LOC_Os01g09850	1380.63	-1.48485	0.64632	0.00538461	0.0332809	GO:0003676	F	nucleic acid binding
OS01G0195000	LOC_Os01g09850	1380.63	-1.48485	0.64632	0.00538461	0.0332809	GO:0009058	P	biosynthetic process
OS01G0195000	LOC_Os01g09850	1380.63	-1.48485	0.64632	0.00538461	0.0332809	GO:0006139	P	nucleobase, nucleoside, nucleotide and nucleic acid metabolic process
OS01G0195000	LOC_Os01g09850	1380.63	-1.48485	0.64632	0.00538461	0.0332809	GO:0005488	F	binding
OS01G0195000	LOC_Os01g09850	1380.63	-1.48485	0.64632	0.00538461	0.0332809	GO:0005622	C	intracellular
OS01G0195000	LOC_Os01g09850	1380.63	-1.48485	0.64632	0.00538461	0.0332809	GO:0003700	F	sequence-specific DNA binding transcription factor activity
OS01G0195000	LOC_Os01g09850	1380.63	-1.48485	0.64632	0.00538461	0.0332809	GO:0003676	F	nucleic acid binding
OS01G0195000	LOC_Os01g09850	1380.63	-1.48485	0.64632	0.00538461	0.0332809	GO:0009058	P	biosynthetic process
OS01G0195000	LOC_Os01g09850	1380.63	-1.48485	0.64632	0.00538461	0.0332809	GO:0006139	P	nucleobase, nucleoside, nucleotide and nucleic acid metabolic process
OS01G0195000	LOC_Os01g09850	1380.63	-1.48485	0.64632	0.00538461	0.0332809	GO:0005488	F	binding
OS01G0195000	LOC_Os01g09850	1380.63	-1.48485	0.64632	0.00538461	0.0332809	GO:0005622	C	intracellular
OS01G0195000	LOC_Os01g09850	1380.63	-1.48485	0.64632	0.00538461	0.0332809	GO:0003700	F	sequence-specific DNA binding transcription factor activity
OS01G0195000	LOC_Os01g09850	1380.63	-1.48485	0.64632	0.00538461	0.0332809	GO:0003676	F	nucleic acid binding
OS01G0195300	LOC_Os01g09870	31.0704	-2.32345	1.1646	0.00446259	0.0287963	GO:0003674	F	molecular_function
OS01G0195300	LOC_Os01g09870	31.0704	-2.32345	1.1646	0.00446259	0.0287963	GO:0005575	C	cellular_component
OS01G0195300	LOC_Os01g09870	31.0704	-2.32345	1.1646	0.00446259	0.0287963	GO:0008150	P	biological_process
OS01G0196300	LOC_Os01g09990	176.402	-1.1872	0.469404	0.00455773	0.0293088	GO:0003677	F	DNA binding
OS01G0196300	LOC_Os01g09990	176.402	-1.1872	0.469404	0.00455773	0.0293088	GO:0005634	C	nucleus
OS01G0196300	LOC_Os01g09990	176.402	-1.1872	0.469404	0.00455773	0.0293088	GO:0008150	P	biological_process
OS01G0196300	LOC_Os01g09990	176.402	-1.1872	0.469404	0.00455773	0.0293088	GO:0009058	P	biosynthetic process
OS01G0196300	LOC_Os01g09990	176.402	-1.1872	0.469404	0.00455773	0.0293088	GO:0006139	P	nucleobase, nucleoside, nucleotide and nucleic acid metabolic process
OS01G0196300	LOC_Os01g09990	176.402	-1.1872	0.469404	0.00455773	0.0293088	GO:0003700	F	sequence-specific DNA binding transcription factor activity
OS01G0196300	LOC_Os01g09990	176.402	-1.1872	0.469404	0.00455773	0.0293088	GO:0003677	F	DNA binding
OS01G0196300	LOC_Os01g09990	176.402	-1.1872	0.469404	0.00455773	0.0293088	GO:0005634	C	nucleus
OS01G0196300	LOC_Os01g09990	176.402	-1.1872	0.469404	0.00455773	0.0293088	GO:0008150	P	biological_process
OS01G0196300	LOC_Os01g09990	176.402	-1.1872	0.469404	0.00455773	0.0293088	GO:0009058	P	biosynthetic process
OS01G0196300	LOC_Os01g09990	176.402	-1.1872	0.469404	0.00455773	0.0293088	GO:0006139	P	nucleobase, nucleoside, nucleotide and nucleic acid metabolic process
OS01G0196300	LOC_Os01g09990	176.402	-1.1872	0.469404	0.00455773	0.0293088	GO:0003700	F	sequence-specific DNA binding transcription factor activity
OS01G0198000	LOC_Os01g10140	343.372	-0.724743	0.27185	0.00541118	0.0333961	GO:0040029	P	regulation of gene expression, epigenetic
OS01G0198000	LOC_Os01g10140	343.372	-0.724743	0.27185	0.00541118	0.0333961	GO:0009987	P	cellular process
OS01G0198000	LOC_Os01g10140	343.372	-0.724743	0.27185	0.00541118	0.0333961	GO:0005575	C	cellular_component
OS01G0198000	LOC_Os01g10140	343.372	-0.724743	0.27185	0.00541118	0.0333961	GO:0016740	F	transferase activity
OS01G0198000	LOC_Os01g10140	343.372	-0.724743	0.27185	0.00541118	0.0333961	GO:0040029	P	regulation of gene expression, epigenetic
OS01G0198000	LOC_Os01g10140	343.372	-0.724743	0.27185	0.00541118	0.0333961	GO:0009987	P	cellular process
OS01G0198000	LOC_Os01g10140	343.372	-0.724743	0.27185	0.00541118	0.0333961	GO:0005575	C	cellular_component
OS01G0198000	LOC_Os01g10140	343.372	-0.724743	0.27185	0.00541118	0.0333961	GO:0016740	F	transferase activity
OS01G0198100	None	170.426	-0.763554	0.215274	0.000262867	0.00281426	None	None	None
OS01G0198500	LOC_Os01g10180	419.219	-1.41225	0.570109	0.00392571	0.0260427	GO:0003674	F	molecular_function
OS01G0198500	LOC_Os01g10180	419.219	-1.41225	0.570109	0.00392571	0.0260427	GO:0005575	C	cellular_component
OS01G0198500	LOC_Os01g10180	419.219	-1.41225	0.570109	0.00392571	0.0260427	GO:0008150	P	biological_process
OS01G0198900	LOC_Os01g10210	484.859	1.32321	0.309073	7.26e-06	0.000115794	GO:0003674	F	molecular_function
OS01G0198900	LOC_Os01g10210	484.859	1.32321	0.309073	7.26e-06	0.000115794	GO:0005575	C	cellular_component
OS01G0198900	LOC_Os01g10210	484.859	1.32321	0.309073	7.26e-06	0.000115794	GO:0008150	P	biological_process
OS01G0201800	LOC_Os01g10520	308.653	2.64497	0.393659	2.33e-12	9.26e-11	None	None	None
OS01G0202500	LOC_Os01g10580	1133.03	2.57673	0.240032	1.05e-27	2.07e-25	GO:0009058	P	biosynthetic process
OS01G0202500	LOC_Os01g10580	1133.03	2.57673	0.240032	1.05e-27	2.07e-25	GO:0006139	P	nucleobase, nucleoside, nucleotide and nucleic acid metabolic process
OS01G0202500	LOC_Os01g10580	1133.03	2.57673	0.240032	1.05e-27	2.07e-25	GO:0005654	C	nucleoplasm
OS01G0202500	LOC_Os01g10580	1133.03	2.57673	0.240032	1.05e-27	2.07e-25	GO:0016043	P	cellular component organization
OS01G0202500	LOC_Os01g10580	1133.03	2.57673	0.240032	1.05e-27	2.07e-25	GO:0009987	P	cellular process
OS01G0202500	LOC_Os01g10580	1133.03	2.57673	0.240032	1.05e-27	2.07e-25	GO:0019748	P	secondary metabolic process
OS01G0202500	LOC_Os01g10580	1133.03	2.57673	0.240032	1.05e-27	2.07e-25	GO:0009628	P	response to abiotic stimulus
OS01G0202500	LOC_Os01g10580	1133.03	2.57673	0.240032	1.05e-27	2.07e-25	GO:0005488	F	binding
OS01G0202500	LOC_Os01g10580	1133.03	2.57673	0.240032	1.05e-27	2.07e-25	GO:0003700	F	sequence-specific DNA binding transcription factor activity
OS01G0202500	LOC_Os01g10580	1133.03	2.57673	0.240032	1.05e-27	2.07e-25	GO:0009791	P	post-embryonic development
OS01G0203800	LOC_Os01g10680	847.464	-1.38917	0.537912	0.00300389	0.0210079	GO:0003674	F	molecular_function
OS01G0203800	LOC_Os01g10680	847.464	-1.38917	0.537912	0.00300389	0.0210079	GO:0005575	C	cellular_component
OS01G0203800	LOC_Os01g10680	847.464	-1.38917	0.537912	0.00300389	0.0210079	GO:0008150	P	biological_process
OS01G0203800	LOC_Os01g10680	847.464	-1.38917	0.537912	0.00300389	0.0210079	GO:0003674	F	molecular_function
OS01G0203800	LOC_Os01g10680	847.464	-1.38917	0.537912	0.00300389	0.0210079	GO:0005575	C	cellular_component
OS01G0203800	LOC_Os01g10680	847.464	-1.38917	0.537912	0.00300389	0.0210079	GO:0008150	P	biological_process
OS01G0205200	LOC_Os01g10800	75.4748	0.85092	0.307878	0.00360586	0.0243588	GO:0007275	P	multicellular organismal development
OS01G0205200	LOC_Os01g10800	75.4748	0.85092	0.307878	0.00360586	0.0243588	GO:0008150	P	biological_process
OS01G0205200	LOC_Os01g10800	75.4748	0.85092	0.307878	0.00360586	0.0243588	GO:0009536	C	plastid
OS01G0205700	LOC_Os01g10840	3266.64	-0.542725	0.157387	0.000474789	0.00468702	GO:0006810	P	transport
OS01G0205700	LOC_Os01g10840	3266.64	-0.542725	0.157387	0.000474789	0.00468702	GO:0009987	P	cellular process
OS01G0205700	LOC_Os01g10840	3266.64	-0.542725	0.157387	0.000474789	0.00468702	GO:0009719	P	response to endogenous stimulus
OS01G0205700	LOC_Os01g10840	3266.64	-0.542725	0.157387	0.000474789	0.00468702	GO:0008152	P	metabolic process
OS01G0205700	LOC_Os01g10840	3266.64	-0.542725	0.157387	0.000474789	0.00468702	GO:0005515	F	protein binding
OS01G0205700	LOC_Os01g10840	3266.64	-0.542725	0.157387	0.000474789	0.00468702	GO:0016301	F	kinase activity
OS01G0205700	LOC_Os01g10840	3266.64	-0.542725	0.157387	0.000474789	0.00468702	GO:0006464	P	protein modification process
OS01G0205700	LOC_Os01g10840	3266.64	-0.542725	0.157387	0.000474789	0.00468702	GO:0007165	P	signal transduction
OS01G0205700	LOC_Os01g10840	3266.64	-0.542725	0.157387	0.000474789	0.00468702	GO:0009653	P	anatomical structure morphogenesis
OS01G0205700	LOC_Os01g10840	3266.64	-0.542725	0.157387	0.000474789	0.00468702	GO:0007275	P	multicellular organismal development
OS01G0205700	LOC_Os01g10840	3266.64	-0.542725	0.157387	0.000474789	0.00468702	GO:0016049	P	cell growth
OS01G0205700	LOC_Os01g10840	3266.64	-0.542725	0.157387	0.000474789	0.00468702	GO:0005886	C	plasma membrane
OS01G0208400	LOC_Os01g11010	31.5157	2.50426	1.68159	0.00720461	0.0414973	GO:0016020	C	membrane
OS01G0208400	LOC_Os01g11010	31.5157	2.50426	1.68159	0.00720461	0.0414973	GO:0005773	C	vacuole
OS01G0208400	LOC_Os01g11010	31.5157	2.50426	1.68159	0.00720461	0.0414973	GO:0005618	C	cell wall
OS01G0208400	LOC_Os01g11010	31.5157	2.50426	1.68159	0.00720461	0.0414973	GO:0008150	P	biological_process
OS01G0208700	LOC_Os01g11054	403.316	-5.18265	0.294022	3.07e-70	5.42e-67	GO:0006091	P	generation of precursor metabolites and energy
OS01G0208700	LOC_Os01g11054	403.316	-5.18265	0.294022	3.07e-70	5.42e-67	GO:0009056	P	catabolic process
OS01G0208700	LOC_Os01g11054	403.316	-5.18265	0.294022	3.07e-70	5.42e-67	GO:0008152	P	metabolic process
OS01G0208700	LOC_Os01g11054	403.316	-5.18265	0.294022	3.07e-70	5.42e-67	GO:0003824	F	catalytic activity
OS01G0208700	LOC_Os01g11054	403.316	-5.18265	0.294022	3.07e-70	5.42e-67	GO:0005829	C	cytosol
OS01G0208700	LOC_Os01g11054	403.316	-5.18265	0.294022	3.07e-70	5.42e-67	GO:0006091	P	generation of precursor metabolites and energy
OS01G0208700	LOC_Os01g11054	403.316	-5.18265	0.294022	3.07e-70	5.42e-67	GO:0009056	P	catabolic process
OS01G0208700	LOC_Os01g11054	403.316	-5.18265	0.294022	3.07e-70	5.42e-67	GO:0005576	C	extracellular region
OS01G0208700	LOC_Os01g11054	403.316	-5.18265	0.294022	3.07e-70	5.42e-67	GO:0009991	P	response to extracellular stimulus
OS01G0208700	LOC_Os01g11054	403.316	-5.18265	0.294022	3.07e-70	5.42e-67	GO:0007154	P	cell communication
OS01G0208700	LOC_Os01g11054	403.316	-5.18265	0.294022	3.07e-70	5.42e-67	GO:0006950	P	response to stress
OS01G0208700	LOC_Os01g11054	403.316	-5.18265	0.294022	3.07e-70	5.42e-67	GO:0005515	F	protein binding
OS01G0208700	LOC_Os01g11054	403.316	-5.18265	0.294022	3.07e-70	5.42e-67	GO:0003824	F	catalytic activity
OS01G0208700	LOC_Os01g11054	403.316	-5.18265	0.294022	3.07e-70	5.42e-67	GO:0005829	C	cytosol
OS01G0208700	LOC_Os01g11054	403.316	-5.18265	0.294022	3.07e-70	5.42e-67	GO:0016043	P	cellular component organization
OS01G0208700	LOC_Os01g11054	403.316	-5.18265	0.294022	3.07e-70	5.42e-67	GO:0006091	P	generation of precursor metabolites and energy
OS01G0208700	LOC_Os01g11054	403.316	-5.18265	0.294022	3.07e-70	5.42e-67	GO:0009056	P	catabolic process
OS01G0208700	LOC_Os01g11054	403.316	-5.18265	0.294022	3.07e-70	5.42e-67	GO:0005576	C	extracellular region
OS01G0208700	LOC_Os01g11054	403.316	-5.18265	0.294022	3.07e-70	5.42e-67	GO:0009991	P	response to extracellular stimulus
OS01G0208700	LOC_Os01g11054	403.316	-5.18265	0.294022	3.07e-70	5.42e-67	GO:0007154	P	cell communication
OS01G0208700	LOC_Os01g11054	403.316	-5.18265	0.294022	3.07e-70	5.42e-67	GO:0006950	P	response to stress
OS01G0208700	LOC_Os01g11054	403.316	-5.18265	0.294022	3.07e-70	5.42e-67	GO:0005515	F	protein binding
OS01G0208700	LOC_Os01g11054	403.316	-5.18265	0.294022	3.07e-70	5.42e-67	GO:0003824	F	catalytic activity
OS01G0208700	LOC_Os01g11054	403.316	-5.18265	0.294022	3.07e-70	5.42e-67	GO:0005829	C	cytosol
OS01G0208700	LOC_Os01g11054	403.316	-5.18265	0.294022	3.07e-70	5.42e-67	GO:0016043	P	cellular component organization
OS01G0208700	LOC_Os01g11054	403.316	-5.18265	0.294022	3.07e-70	5.42e-67	GO:0006091	P	generation of precursor metabolites and energy
OS01G0208700	LOC_Os01g11054	403.316	-5.18265	0.294022	3.07e-70	5.42e-67	GO:0009056	P	catabolic process
OS01G0208700	LOC_Os01g11054	403.316	-5.18265	0.294022	3.07e-70	5.42e-67	GO:0005576	C	extracellular region
OS01G0208700	LOC_Os01g11054	403.316	-5.18265	0.294022	3.07e-70	5.42e-67	GO:0009991	P	response to extracellular stimulus
OS01G0208700	LOC_Os01g11054	403.316	-5.18265	0.294022	3.07e-70	5.42e-67	GO:0007154	P	cell communication
OS01G0208700	LOC_Os01g11054	403.316	-5.18265	0.294022	3.07e-70	5.42e-67	GO:0006950	P	response to stress
OS01G0208700	LOC_Os01g11054	403.316	-5.18265	0.294022	3.07e-70	5.42e-67	GO:0005515	F	protein binding
OS01G0208700	LOC_Os01g11054	403.316	-5.18265	0.294022	3.07e-70	5.42e-67	GO:0003824	F	catalytic activity
OS01G0208700	LOC_Os01g11054	403.316	-5.18265	0.294022	3.07e-70	5.42e-67	GO:0005829	C	cytosol
OS01G0208700	LOC_Os01g11054	403.316	-5.18265	0.294022	3.07e-70	5.42e-67	GO:0016043	P	cellular component organization
OS01G0209200	LOC_Os01g11110	474.3	-0.990663	0.287325	0.000308918	0.00322701	GO:0005515	F	protein binding
OS01G0209400	LOC_Os01g11120	830.854	-0.754176	0.232574	0.000825517	0.00738894	GO:0005575	C	cellular_component
OS01G0209400	LOC_Os01g11120	830.854	-0.754176	0.232574	0.000825517	0.00738894	GO:0003723	F	RNA binding
OS01G0209400	LOC_Os01g11120	830.854	-0.754176	0.232574	0.000825517	0.00738894	GO:0000166	F	nucleotide binding
OS01G0209400	LOC_Os01g11120	830.854	-0.754176	0.232574	0.000825517	0.00738894	GO:0008150	P	biological_process
OS01G0209400	LOC_Os01g11120	830.854	-0.754176	0.232574	0.000825517	0.00738894	GO:0003676	F	nucleic acid binding
OS01G0210500	LOC_Os01g11230	2246.53	0.994541	0.317083	0.000966048	0.00840915	GO:0016020	C	membrane
OS01G0210500	LOC_Os01g11230	2246.53	0.994541	0.317083	0.000966048	0.00840915	GO:0005773	C	vacuole
OS01G0210500	LOC_Os01g11230	2246.53	0.994541	0.317083	0.000966048	0.00840915	GO:0008150	P	biological_process
OS01G0210500	LOC_Os01g11230	2246.53	0.994541	0.317083	0.000966048	0.00840915	GO:0005488	F	binding
OS01G0210500	LOC_Os01g11230	2246.53	0.994541	0.317083	0.000966048	0.00840915	GO:0016020	C	membrane
OS01G0210500	LOC_Os01g11230	2246.53	0.994541	0.317083	0.000966048	0.00840915	GO:0005773	C	vacuole
OS01G0210500	LOC_Os01g11230	2246.53	0.994541	0.317083	0.000966048	0.00840915	GO:0008150	P	biological_process
OS01G0210500	LOC_Os01g11230	2246.53	0.994541	0.317083	0.000966048	0.00840915	GO:0005488	F	binding
OS01G0210550	None	15.0221	1.27416	0.535661	0.00630168	0.0375528	None	None	None
OS01G0210600	LOC_Os01g11240	9727.21	-0.753309	0.250642	0.00178543	0.0138503	GO:0005575	C	cellular_component
OS01G0210600	LOC_Os01g11240	9727.21	-0.753309	0.250642	0.00178543	0.0138503	GO:0008150	P	biological_process
OS01G0210800	LOC_Os01g11260	324.639	-0.736131	0.248416	0.00219062	0.0163622	GO:0016020	C	membrane
OS01G0210800	LOC_Os01g11260	324.639	-0.736131	0.248416	0.00219062	0.0163622	GO:0006810	P	transport
OS01G0210800	LOC_Os01g11260	324.639	-0.736131	0.248416	0.00219062	0.0163622	GO:0009987	P	cellular process
OS01G0210800	LOC_Os01g11260	324.639	-0.736131	0.248416	0.00219062	0.0163622	GO:0009058	P	biosynthetic process
OS01G0210800	LOC_Os01g11260	324.639	-0.736131	0.248416	0.00219062	0.0163622	GO:0006464	P	protein modification process
OS01G0210800	LOC_Os01g11260	324.639	-0.736131	0.248416	0.00219062	0.0163622	GO:0005975	P	carbohydrate metabolic process
OS01G0210800	LOC_Os01g11260	324.639	-0.736131	0.248416	0.00219062	0.0163622	GO:0005215	F	transporter activity
OS01G0210800	LOC_Os01g11260	324.639	-0.736131	0.248416	0.00219062	0.0163622	GO:0003824	F	catalytic activity
OS01G0210800	LOC_Os01g11260	324.639	-0.736131	0.248416	0.00219062	0.0163622	GO:0006629	P	lipid metabolic process
OS01G0211600	LOC_Os01g11340	3281.91	1.58876	0.628902	0.00295232	0.0207063	GO:0008152	P	metabolic process
OS01G0211600	LOC_Os01g11340	3281.91	1.58876	0.628902	0.00295232	0.0207063	GO:0019825	F	oxygen binding
OS01G0211600	LOC_Os01g11340	3281.91	1.58876	0.628902	0.00295232	0.0207063	GO:0003824	F	catalytic activity
OS01G0214001	None	109.416	-2.11869	1.10077	0.00555896	0.034064	None	None	None
OS01G0214500	LOC_Os01g11600	141.927	-1.46461	0.674459	0.00777051	0.0438613	GO:0003674	F	molecular_function
OS01G0214500	LOC_Os01g11600	141.927	-1.46461	0.674459	0.00777051	0.0438613	GO:0008150	P	biological_process
OS01G0214600	LOC_Os01g11620	174.717	1.59859	0.416677	3.55e-05	0.000484799	GO:0005623	C	cell
OS01G0214600	LOC_Os01g11620	174.717	1.59859	0.416677	3.55e-05	0.000484799	GO:0008152	P	metabolic process
OS01G0214600	LOC_Os01g11620	174.717	1.59859	0.416677	3.55e-05	0.000484799	GO:0016787	F	hydrolase activity
OS01G0214600	LOC_Os01g11620	174.717	1.59859	0.416677	3.55e-05	0.000484799	GO:0006629	P	lipid metabolic process
OS01G0214600	LOC_Os01g11620	174.717	1.59859	0.416677	3.55e-05	0.000484799	GO:0008152	P	metabolic process
OS01G0214600	LOC_Os01g11620	174.717	1.59859	0.416677	3.55e-05	0.000484799	GO:0016787	F	hydrolase activity
OS01G0214600	LOC_Os01g11620	174.717	1.59859	0.416677	3.55e-05	0.000484799	GO:0005618	C	cell wall
OS01G0214600	LOC_Os01g11620	174.717	1.59859	0.416677	3.55e-05	0.000484799	GO:0006629	P	lipid metabolic process
OS01G0215000	LOC_Os01g11660	38.3762	10.3221	2.91433	1.78e-15	9.91e-14	GO:0005623	C	cell
OS01G0215000	LOC_Os01g11660	38.3762	10.3221	2.91433	1.78e-15	9.91e-14	GO:0008152	P	metabolic process
OS01G0215000	LOC_Os01g11660	38.3762	10.3221	2.91433	1.78e-15	9.91e-14	GO:0016787	F	hydrolase activity
OS01G0215000	LOC_Os01g11660	38.3762	10.3221	2.91433	1.78e-15	9.91e-14	GO:0006629	P	lipid metabolic process
OS01G0216500	LOC_Os01g11760	7.38664	3.29922	1.05278	0.000195045	0.00218791	GO:0008152	P	metabolic process
OS01G0216500	LOC_Os01g11760	7.38664	3.29922	1.05278	0.000195045	0.00218791	GO:0016787	F	hydrolase activity
OS01G0216500	LOC_Os01g11760	7.38664	3.29922	1.05278	0.000195045	0.00218791	GO:0005618	C	cell wall
OS01G0216500	LOC_Os01g11760	7.38664	3.29922	1.05278	0.000195045	0.00218791	GO:0006629	P	lipid metabolic process
OS01G0217000	LOC_Os01g11810	200.757	0.871427	0.272445	0.000881401	0.00780796	GO:0005623	C	cell
OS01G0217000	LOC_Os01g11810	200.757	0.871427	0.272445	0.000881401	0.00780796	GO:0008150	P	biological_process
OS01G0217000	LOC_Os01g11810	200.757	0.871427	0.272445	0.000881401	0.00780796	GO:0005623	C	cell
OS01G0217000	LOC_Os01g11810	200.757	0.871427	0.272445	0.000881401	0.00780796	GO:0008150	P	biological_process
OS01G0217500	LOC_Os01g11860	402.208	2.04799	0.291863	4.61e-13	2.03e-11	GO:0008150	P	biological_process
OS01G0217500	LOC_Os01g11860	402.208	2.04799	0.291863	4.61e-13	2.03e-11	GO:0009536	C	plastid
OS01G0217800	LOC_Os01g11880	966.821	1.12103	0.215844	1.04e-07	2.32e-06	GO:0008150	P	biological_process
OS01G0217800	LOC_Os01g11880	966.821	1.12103	0.215844	1.04e-07	2.32e-06	GO:0009536	C	plastid
OS01G0220100	LOC_Os01g12070	112.563	3.13361	0.546055	9.42e-10	2.78e-08	GO:0005623	C	cell
OS01G0220100	LOC_Os01g12070	112.563	3.13361	0.546055	9.42e-10	2.78e-08	GO:0030246	F	carbohydrate binding
OS01G0220100	LOC_Os01g12070	112.563	3.13361	0.546055	9.42e-10	2.78e-08	GO:0016787	F	hydrolase activity
OS01G0220100	LOC_Os01g12070	112.563	3.13361	0.546055	9.42e-10	2.78e-08	GO:0008152	P	metabolic process
OS01G0220100	LOC_Os01g12070	112.563	3.13361	0.546055	9.42e-10	2.78e-08	GO:0005975	P	carbohydrate metabolic process
OS01G0220100	LOC_Os01g12070	112.563	3.13361	0.546055	9.42e-10	2.78e-08	GO:0005576	C	extracellular region
OS01G0220100	LOC_Os01g12070	112.563	3.13361	0.546055	9.42e-10	2.78e-08	GO:0003824	F	catalytic activity
OS01G0221800	None	17.0343	1.48224	0.523013	0.00142216	0.0115444	None	None	None
OS01G0223000	LOC_Os01g12304	141.544	-0.663287	0.21832	0.00181242	0.0140366	GO:0005623	C	cell
OS01G0223000	LOC_Os01g12304	141.544	-0.663287	0.21832	0.00181242	0.0140366	GO:0008152	P	metabolic process
OS01G0223000	LOC_Os01g12304	141.544	-0.663287	0.21832	0.00181242	0.0140366	GO:0016787	F	hydrolase activity
OS01G0223000	LOC_Os01g12304	141.544	-0.663287	0.21832	0.00181242	0.0140366	GO:0006629	P	lipid metabolic process
OS01G0223500	LOC_Os01g12381	77.7145	1.62715	0.612265	0.00189131	0.0145041	GO:0008152	P	metabolic process
OS01G0223500	LOC_Os01g12381	77.7145	1.62715	0.612265	0.00189131	0.0145041	GO:0016787	F	hydrolase activity
OS01G0223500	LOC_Os01g12381	77.7145	1.62715	0.612265	0.00189131	0.0145041	GO:0006629	P	lipid metabolic process
OS01G0223500	LOC_Os01g12381	77.7145	1.62715	0.612265	0.00189131	0.0145041	GO:0005773	C	vacuole
OS01G0225000	LOC_Os01g12520	73.7703	-2.10099	0.765448	0.000893854	0.00789744	GO:0006810	P	transport
OS01G0225000	LOC_Os01g12520	73.7703	-2.10099	0.765448	0.000893854	0.00789744	GO:0009058	P	biosynthetic process
OS01G0225000	LOC_Os01g12520	73.7703	-2.10099	0.765448	0.000893854	0.00789744	GO:0009987	P	cellular process
OS01G0225000	LOC_Os01g12520	73.7703	-2.10099	0.765448	0.000893854	0.00789744	GO:0005215	F	transporter activity
OS01G0225000	LOC_Os01g12520	73.7703	-2.10099	0.765448	0.000893854	0.00789744	GO:0005488	F	binding
OS01G0225000	LOC_Os01g12520	73.7703	-2.10099	0.765448	0.000893854	0.00789744	GO:0006950	P	response to stress
OS01G0225000	LOC_Os01g12520	73.7703	-2.10099	0.765448	0.000893854	0.00789744	GO:0009628	P	response to abiotic stimulus
OS01G0225000	LOC_Os01g12520	73.7703	-2.10099	0.765448	0.000893854	0.00789744	GO:0016020	C	membrane
OS01G0225000	LOC_Os01g12520	73.7703	-2.10099	0.765448	0.000893854	0.00789744	GO:0005739	C	mitochondrion
OS01G0226700	LOC_Os01g12690	113.221	-2.89924	1.14569	0.000778477	0.00703744	GO:0008150	P	biological_process
OS01G0226700	LOC_Os01g12690	113.221	-2.89924	1.14569	0.000778477	0.00703744	GO:0005886	C	plasma membrane
OS01G0227100	LOC_Os01g12710	128.604	1.11202	0.384631	0.00180698	0.013998	GO:0019538	P	protein metabolic process
OS01G0227100	LOC_Os01g12710	128.604	1.11202	0.384631	0.00180698	0.013998	GO:0009056	P	catabolic process
OS01G0227100	LOC_Os01g12710	128.604	1.11202	0.384631	0.00180698	0.013998	GO:0009987	P	cellular process
OS01G0227100	LOC_Os01g12710	128.604	1.11202	0.384631	0.00180698	0.013998	GO:0003824	F	catalytic activity
OS01G0227100	LOC_Os01g12710	128.604	1.11202	0.384631	0.00180698	0.013998	GO:0008152	P	metabolic process
OS01G0227100	LOC_Os01g12710	128.604	1.11202	0.384631	0.00180698	0.013998	GO:0009536	C	plastid
OS01G0227100	LOC_Os01g12710	128.604	1.11202	0.384631	0.00180698	0.013998	GO:0019538	P	protein metabolic process
OS01G0227100	LOC_Os01g12710	128.604	1.11202	0.384631	0.00180698	0.013998	GO:0009056	P	catabolic process
OS01G0227100	LOC_Os01g12710	128.604	1.11202	0.384631	0.00180698	0.013998	GO:0009987	P	cellular process
OS01G0227100	LOC_Os01g12710	128.604	1.11202	0.384631	0.00180698	0.013998	GO:0003824	F	catalytic activity
OS01G0227100	LOC_Os01g12710	128.604	1.11202	0.384631	0.00180698	0.013998	GO:0008152	P	metabolic process
OS01G0227100	LOC_Os01g12710	128.604	1.11202	0.384631	0.00180698	0.013998	GO:0009536	C	plastid
OS01G0227200	LOC_Os01g12720	1204.67	-0.750338	0.295953	0.00774739	0.043808	GO:0006950	P	response to stress
OS01G0227200	LOC_Os01g12720	1204.67	-0.750338	0.295953	0.00774739	0.043808	GO:0009607	P	response to biotic stimulus
OS01G0227200	LOC_Os01g12720	1204.67	-0.750338	0.295953	0.00774739	0.043808	GO:0016301	F	kinase activity
OS01G0227200	LOC_Os01g12720	1204.67	-0.750338	0.295953	0.00774739	0.043808	GO:0000166	F	nucleotide binding
OS01G0227200	LOC_Os01g12720	1204.67	-0.750338	0.295953	0.00774739	0.043808	GO:0006464	P	protein modification process
OS01G0227200	LOC_Os01g12720	1204.67	-0.750338	0.295953	0.00774739	0.043808	GO:0005886	C	plasma membrane
OS01G0227500	LOC_Os01g12750	43.5829	3.99208	0.585026	7.78e-13	3.33e-11	GO:0003674	F	molecular_function
OS01G0227500	LOC_Os01g12750	43.5829	3.99208	0.585026	7.78e-13	3.33e-11	GO:0005488	F	binding
OS01G0227500	LOC_Os01g12750	43.5829	3.99208	0.585026	7.78e-13	3.33e-11	GO:0003824	F	catalytic activity
OS01G0227500	LOC_Os01g12750	43.5829	3.99208	0.585026	7.78e-13	3.33e-11	GO:0008152	P	metabolic process
OS01G0227500	LOC_Os01g12750	43.5829	3.99208	0.585026	7.78e-13	3.33e-11	GO:0019825	F	oxygen binding
OS01G0227800	LOC_Os01g12770	40.2583	4.11529	0.861219	1.29e-07	2.82e-06	GO:0003674	F	molecular_function
OS01G0227800	LOC_Os01g12770	40.2583	4.11529	0.861219	1.29e-07	2.82e-06	GO:0005488	F	binding
OS01G0227800	LOC_Os01g12770	40.2583	4.11529	0.861219	1.29e-07	2.82e-06	GO:0003824	F	catalytic activity
OS01G0227800	LOC_Os01g12770	40.2583	4.11529	0.861219	1.29e-07	2.82e-06	GO:0008152	P	metabolic process
OS01G0227800	LOC_Os01g12770	40.2583	4.11529	0.861219	1.29e-07	2.82e-06	GO:0019825	F	oxygen binding
OS01G0228400	LOC_Os01g12810	333.201	1.05539	0.365526	0.00195205	0.0148815	None	None	None
OS01G0228800	LOC_Os01g12840	1177.84	-1.48991	0.537543	0.00155256	0.0123843	GO:0008150	P	biological_process
OS01G0233000	LOC_Os01g13210	7090.36	1.03909	0.367694	0.00275229	0.0196231	GO:0006950	P	response to stress
OS01G0233000	LOC_Os01g13210	7090.36	1.03909	0.367694	0.00275229	0.0196231	GO:0009628	P	response to abiotic stimulus
OS01G0233000	LOC_Os01g13210	7090.36	1.03909	0.367694	0.00275229	0.0196231	GO:0009607	P	response to biotic stimulus
OS01G0233000	LOC_Os01g13210	7090.36	1.03909	0.367694	0.00275229	0.0196231	GO:0005773	C	vacuole
OS01G0233000	LOC_Os01g13210	7090.36	1.03909	0.367694	0.00275229	0.0196231	GO:0008289	F	lipid binding
OS01G0233000	LOC_Os01g13210	7090.36	1.03909	0.367694	0.00275229	0.0196231	GO:0009058	P	biosynthetic process
OS01G0233000	LOC_Os01g13210	7090.36	1.03909	0.367694	0.00275229	0.0196231	GO:0006464	P	protein modification process
OS01G0233000	LOC_Os01g13210	7090.36	1.03909	0.367694	0.00275229	0.0196231	GO:0005488	F	binding
OS01G0233000	LOC_Os01g13210	7090.36	1.03909	0.367694	0.00275229	0.0196231	GO:0005515	F	protein binding
OS01G0233000	LOC_Os01g13210	7090.36	1.03909	0.367694	0.00275229	0.0196231	GO:0005886	C	plasma membrane
OS01G0233000	LOC_Os01g13210	7090.36	1.03909	0.367694	0.00275229	0.0196231	GO:0009536	C	plastid
OS01G0233000	LOC_Os01g13210	7090.36	1.03909	0.367694	0.00275229	0.0196231	GO:0006950	P	response to stress
OS01G0233000	LOC_Os01g13210	7090.36	1.03909	0.367694	0.00275229	0.0196231	GO:0009628	P	response to abiotic stimulus
OS01G0233000	LOC_Os01g13210	7090.36	1.03909	0.367694	0.00275229	0.0196231	GO:0009607	P	response to biotic stimulus
OS01G0233000	LOC_Os01g13210	7090.36	1.03909	0.367694	0.00275229	0.0196231	GO:0005773	C	vacuole
OS01G0233000	LOC_Os01g13210	7090.36	1.03909	0.367694	0.00275229	0.0196231	GO:0008289	F	lipid binding
OS01G0233000	LOC_Os01g13210	7090.36	1.03909	0.367694	0.00275229	0.0196231	GO:0009058	P	biosynthetic process
OS01G0233000	LOC_Os01g13210	7090.36	1.03909	0.367694	0.00275229	0.0196231	GO:0006464	P	protein modification process
OS01G0233000	LOC_Os01g13210	7090.36	1.03909	0.367694	0.00275229	0.0196231	GO:0005488	F	binding
OS01G0233000	LOC_Os01g13210	7090.36	1.03909	0.367694	0.00275229	0.0196231	GO:0005515	F	protein binding
OS01G0233000	LOC_Os01g13210	7090.36	1.03909	0.367694	0.00275229	0.0196231	GO:0005886	C	plasma membrane
OS01G0233000	LOC_Os01g13210	7090.36	1.03909	0.367694	0.00275229	0.0196231	GO:0009536	C	plastid
OS01G0233500	LOC_Os01g13260	196.543	0.982505	0.38013	0.00527843	0.0328303	GO:0008150	P	biological_process
OS01G0233500	LOC_Os01g13260	196.543	0.982505	0.38013	0.00527843	0.0328303	GO:0008152	P	metabolic process
OS01G0233500	LOC_Os01g13260	196.543	0.982505	0.38013	0.00527843	0.0328303	GO:0009987	P	cellular process
OS01G0233500	LOC_Os01g13260	196.543	0.982505	0.38013	0.00527843	0.0328303	GO:0005634	C	nucleus
OS01G0233500	LOC_Os01g13260	196.543	0.982505	0.38013	0.00527843	0.0328303	GO:0030234	F	enzyme regulator activity
OS01G0233500	LOC_Os01g13260	196.543	0.982505	0.38013	0.00527843	0.0328303	GO:0007049	P	cell cycle
OS01G0233500	LOC_Os01g13260	196.543	0.982505	0.38013	0.00527843	0.0328303	GO:0005737	C	cytoplasm
OS01G0234800	LOC_Os01g13350	480.754	-0.573131	0.19729	0.0029998	0.0209911	GO:0006810	P	transport
OS01G0234800	LOC_Os01g13350	480.754	-0.573131	0.19729	0.0029998	0.0209911	GO:0016020	C	membrane
OS01G0234800	LOC_Os01g13350	480.754	-0.573131	0.19729	0.0029998	0.0209911	GO:0005783	C	endoplasmic reticulum
OS01G0234800	LOC_Os01g13350	480.754	-0.573131	0.19729	0.0029998	0.0209911	GO:0005794	C	Golgi apparatus
OS01G0234800	LOC_Os01g13350	480.754	-0.573131	0.19729	0.0029998	0.0209911	GO:0005886	C	plasma membrane
OS01G0234800	LOC_Os01g13350	480.754	-0.573131	0.19729	0.0029998	0.0209911	GO:0009987	P	cellular process
OS01G0234800	LOC_Os01g13350	480.754	-0.573131	0.19729	0.0029998	0.0209911	GO:0005215	F	transporter activity
OS01G0234800	LOC_Os01g13350	480.754	-0.573131	0.19729	0.0029998	0.0209911	GO:0006810	P	transport
OS01G0234800	LOC_Os01g13350	480.754	-0.573131	0.19729	0.0029998	0.0209911	GO:0016020	C	membrane
OS01G0234800	LOC_Os01g13350	480.754	-0.573131	0.19729	0.0029998	0.0209911	GO:0005783	C	endoplasmic reticulum
OS01G0234800	LOC_Os01g13350	480.754	-0.573131	0.19729	0.0029998	0.0209911	GO:0005794	C	Golgi apparatus
OS01G0234800	LOC_Os01g13350	480.754	-0.573131	0.19729	0.0029998	0.0209911	GO:0005886	C	plasma membrane
OS01G0234800	LOC_Os01g13350	480.754	-0.573131	0.19729	0.0029998	0.0209911	GO:0009987	P	cellular process
OS01G0234800	LOC_Os01g13350	480.754	-0.573131	0.19729	0.0029998	0.0209911	GO:0005215	F	transporter activity
OS01G0235100	LOC_Os01g13390	111.378	5.14075	0.455178	1.45e-30	3.79e-28	GO:0003674	F	molecular_function
OS01G0235100	LOC_Os01g13390	111.378	5.14075	0.455178	1.45e-30	3.79e-28	GO:0016020	C	membrane
OS01G0235100	LOC_Os01g13390	111.378	5.14075	0.455178	1.45e-30	3.79e-28	GO:0009536	C	plastid
OS01G0235100	LOC_Os01g13390	111.378	5.14075	0.455178	1.45e-30	3.79e-28	GO:0009579	C	thylakoid
OS01G0235100	LOC_Os01g13390	111.378	5.14075	0.455178	1.45e-30	3.79e-28	GO:0008150	P	biological_process
OS01G0235325	None	13.0985	-1.90297	0.779405	0.00273475	0.0195354	None	None	None
OS01G0236300	LOC_Os01g13520	1182.93	-1.01596	0.329704	0.00110085	0.0093759	GO:0005575	C	cellular_component
OS01G0236300	LOC_Os01g13520	1182.93	-1.01596	0.329704	0.00110085	0.0093759	GO:0009058	P	biosynthetic process
OS01G0236300	LOC_Os01g13520	1182.93	-1.01596	0.329704	0.00110085	0.0093759	GO:0006139	P	nucleobase, nucleoside, nucleotide and nucleic acid metabolic process
OS01G0236300	LOC_Os01g13520	1182.93	-1.01596	0.329704	0.00110085	0.0093759	GO:0009719	P	response to endogenous stimulus
OS01G0236300	LOC_Os01g13520	1182.93	-1.01596	0.329704	0.00110085	0.0093759	GO:0003700	F	sequence-specific DNA binding transcription factor activity
OS01G0236300	LOC_Os01g13520	1182.93	-1.01596	0.329704	0.00110085	0.0093759	GO:0005575	C	cellular_component
OS01G0236300	LOC_Os01g13520	1182.93	-1.01596	0.329704	0.00110085	0.0093759	GO:0009058	P	biosynthetic process
OS01G0236300	LOC_Os01g13520	1182.93	-1.01596	0.329704	0.00110085	0.0093759	GO:0006139	P	nucleobase, nucleoside, nucleotide and nucleic acid metabolic process
OS01G0236300	LOC_Os01g13520	1182.93	-1.01596	0.329704	0.00110085	0.0093759	GO:0009719	P	response to endogenous stimulus
OS01G0236300	LOC_Os01g13520	1182.93	-1.01596	0.329704	0.00110085	0.0093759	GO:0003700	F	sequence-specific DNA binding transcription factor activity
OS01G0236800	LOC_Os01g13550	440.247	-0.528029	0.201043	0.00722974	0.0416063	GO:0005634	C	nucleus
OS01G0236800	LOC_Os01g13550	440.247	-0.528029	0.201043	0.00722974	0.0416063	GO:0008152	P	metabolic process
OS01G0236800	LOC_Os01g13550	440.247	-0.528029	0.201043	0.00722974	0.0416063	GO:0006950	P	response to stress
OS01G0236800	LOC_Os01g13550	440.247	-0.528029	0.201043	0.00722974	0.0416063	GO:0009628	P	response to abiotic stimulus
OS01G0236800	LOC_Os01g13550	440.247	-0.528029	0.201043	0.00722974	0.0416063	GO:0005829	C	cytosol
OS01G0236800	LOC_Os01g13550	440.247	-0.528029	0.201043	0.00722974	0.0416063	GO:0016787	F	hydrolase activity
OS01G0236800	LOC_Os01g13550	440.247	-0.528029	0.201043	0.00722974	0.0416063	GO:0005975	P	carbohydrate metabolic process
OS01G0236800	LOC_Os01g13550	440.247	-0.528029	0.201043	0.00722974	0.0416063	GO:0009987	P	cellular process
OS01G0236800	LOC_Os01g13550	440.247	-0.528029	0.201043	0.00722974	0.0416063	GO:0009056	P	catabolic process
OS01G0236900	None	5.08673	-3.25634	1.36145	0.00161378	0.0127715	None	None	None
OS01G0238200	LOC_Os01g13660	1330.89	-1.29163	0.255428	1.72e-07	3.71e-06	None	None	None
OS01G0238500	LOC_Os01g13690	51.7342	1.05051	0.43418	0.00758328	0.0431527	GO:0003824	F	catalytic activity
OS01G0238500	LOC_Os01g13690	51.7342	1.05051	0.43418	0.00758328	0.0431527	GO:0008152	P	metabolic process
OS01G0238500	LOC_Os01g13690	51.7342	1.05051	0.43418	0.00758328	0.0431527	GO:0009058	P	biosynthetic process
OS01G0238500	LOC_Os01g13690	51.7342	1.05051	0.43418	0.00758328	0.0431527	GO:0009987	P	cellular process
OS01G0238500	LOC_Os01g13690	51.7342	1.05051	0.43418	0.00758328	0.0431527	GO:0009536	C	plastid
OS01G0239200	LOC_Os01g13770	1907.57	1.92389	0.49759	2.28e-05	0.000327096	GO:0016020	C	membrane
OS01G0239200	LOC_Os01g13770	1907.57	1.92389	0.49759	2.28e-05	0.000327096	GO:0006810	P	transport
OS01G0239200	LOC_Os01g13770	1907.57	1.92389	0.49759	2.28e-05	0.000327096	GO:0009987	P	cellular process
OS01G0239200	LOC_Os01g13770	1907.57	1.92389	0.49759	2.28e-05	0.000327096	GO:0009628	P	response to abiotic stimulus
OS01G0239200	LOC_Os01g13770	1907.57	1.92389	0.49759	2.28e-05	0.000327096	GO:0005215	F	transporter activity
OS01G0239200	LOC_Os01g13770	1907.57	1.92389	0.49759	2.28e-05	0.000327096	GO:0009536	C	plastid
OS01G0239200	LOC_Os01g13770	1907.57	1.92389	0.49759	2.28e-05	0.000327096	GO:0016020	C	membrane
OS01G0239200	LOC_Os01g13770	1907.57	1.92389	0.49759	2.28e-05	0.000327096	GO:0006810	P	transport
OS01G0239200	LOC_Os01g13770	1907.57	1.92389	0.49759	2.28e-05	0.000327096	GO:0009987	P	cellular process
OS01G0239200	LOC_Os01g13770	1907.57	1.92389	0.49759	2.28e-05	0.000327096	GO:0009628	P	response to abiotic stimulus
OS01G0239200	LOC_Os01g13770	1907.57	1.92389	0.49759	2.28e-05	0.000327096	GO:0005215	F	transporter activity
OS01G0239200	LOC_Os01g13770	1907.57	1.92389	0.49759	2.28e-05	0.000327096	GO:0009536	C	plastid
OS01G0239200	LOC_Os01g13770	1907.57	1.92389	0.49759	2.28e-05	0.000327096	GO:0016020	C	membrane
OS01G0239200	LOC_Os01g13770	1907.57	1.92389	0.49759	2.28e-05	0.000327096	GO:0006810	P	transport
OS01G0239200	LOC_Os01g13770	1907.57	1.92389	0.49759	2.28e-05	0.000327096	GO:0009987	P	cellular process
OS01G0239200	LOC_Os01g13770	1907.57	1.92389	0.49759	2.28e-05	0.000327096	GO:0009628	P	response to abiotic stimulus
OS01G0239200	LOC_Os01g13770	1907.57	1.92389	0.49759	2.28e-05	0.000327096	GO:0005215	F	transporter activity
OS01G0239200	LOC_Os01g13770	1907.57	1.92389	0.49759	2.28e-05	0.000327096	GO:0009536	C	plastid
OS01G0241000	LOC_Os01g13930	557.014	2.70375	0.430103	4.22e-11	1.48e-09	GO:0003674	F	molecular_function
OS01G0241000	LOC_Os01g13930	557.014	2.70375	0.430103	4.22e-11	1.48e-09	GO:0005575	C	cellular_component
OS01G0241000	LOC_Os01g13930	557.014	2.70375	0.430103	4.22e-11	1.48e-09	GO:0008150	P	biological_process
OS01G0243200	LOC_Os01g14100	417.53	-2.01128	0.587442	0.000104943	0.00126831	GO:0006810	P	transport
OS01G0243200	LOC_Os01g14100	417.53	-2.01128	0.587442	0.000104943	0.00126831	GO:0016020	C	membrane
OS01G0243200	LOC_Os01g14100	417.53	-2.01128	0.587442	0.000104943	0.00126831	GO:0005215	F	transporter activity
OS01G0243200	LOC_Os01g14100	417.53	-2.01128	0.587442	0.000104943	0.00126831	GO:0006810	P	transport
OS01G0243200	LOC_Os01g14100	417.53	-2.01128	0.587442	0.000104943	0.00126831	GO:0016020	C	membrane
OS01G0243200	LOC_Os01g14100	417.53	-2.01128	0.587442	0.000104943	0.00126831	GO:0005215	F	transporter activity
OS01G0243200	LOC_Os01g14100	417.53	-2.01128	0.587442	0.000104943	0.00126831	GO:0006810	P	transport
OS01G0243200	LOC_Os01g14100	417.53	-2.01128	0.587442	0.000104943	0.00126831	GO:0016020	C	membrane
OS01G0243200	LOC_Os01g14100	417.53	-2.01128	0.587442	0.000104943	0.00126831	GO:0005215	F	transporter activity
OS01G0243300	None	6.27829	-4.15648	1.93152	0.00142724	0.0115748	None	None	None
OS01G0246500	LOC_Os01g14420	318.655	-0.641636	0.205376	0.00137667	0.0112516	GO:0003674	F	molecular_function
OS01G0246500	LOC_Os01g14420	318.655	-0.641636	0.205376	0.00137667	0.0112516	GO:0005575	C	cellular_component
OS01G0246500	LOC_Os01g14420	318.655	-0.641636	0.205376	0.00137667	0.0112516	GO:0008150	P	biological_process
OS01G0248701	LOC_Os01g14630	79.7064	-4.46825	2.21883	0.000919411	0.00807014	GO:0009058	P	biosynthetic process
OS01G0248701	LOC_Os01g14630	79.7064	-4.46825	2.21883	0.000919411	0.00807014	GO:0009987	P	cellular process
OS01G0248701	LOC_Os01g14630	79.7064	-4.46825	2.21883	0.000919411	0.00807014	GO:0006629	P	lipid metabolic process
OS01G0248701	LOC_Os01g14630	79.7064	-4.46825	2.21883	0.000919411	0.00807014	GO:0008152	P	metabolic process
OS01G0248701	LOC_Os01g14630	79.7064	-4.46825	2.21883	0.000919411	0.00807014	GO:0016740	F	transferase activity
OS01G0248701	LOC_Os01g14630	79.7064	-4.46825	2.21883	0.000919411	0.00807014	GO:0009536	C	plastid
OS01G0248850	None	22.0221	2.61043	0.812801	0.000147711	0.00171324	None	None	None
OS01G0249200	LOC_Os01g14670	437.162	1.94577	0.658611	0.000552675	0.00530461	GO:0005618	C	cell wall
OS01G0249200	LOC_Os01g14670	437.162	1.94577	0.658611	0.000552675	0.00530461	GO:0003674	F	molecular_function
OS01G0249200	LOC_Os01g14670	437.162	1.94577	0.658611	0.000552675	0.00530461	GO:0008150	P	biological_process
OS01G0249200	LOC_Os01g14670	437.162	1.94577	0.658611	0.000552675	0.00530461	GO:0005488	F	binding
OS01G0249900	LOC_Os01g14720	137.831	3.90503	0.315004	2.62e-36	9.88e-34	GO:0009058	P	biosynthetic process
OS01G0249900	LOC_Os01g14720	137.831	3.90503	0.315004	2.62e-36	9.88e-34	GO:0006139	P	nucleobase, nucleoside, nucleotide and nucleic acid metabolic process
OS01G0252200	LOC_Os01g14870	265.517	0.583009	0.223858	0.00749094	0.0427329	GO:0005575	C	cellular_component
OS01G0252200	LOC_Os01g14870	265.517	0.583009	0.223858	0.00749094	0.0427329	GO:0005488	F	binding
OS01G0252200	LOC_Os01g14870	265.517	0.583009	0.223858	0.00749094	0.0427329	GO:0008150	P	biological_process
OS01G0252200	LOC_Os01g14870	265.517	0.583009	0.223858	0.00749094	0.0427329	GO:0003676	F	nucleic acid binding
OS01G0255700	LOC_Os01g15210	8.94452	-3.44574	1.08256	0.00022343	0.00246434	None	None	None
OS01G0255700	LOC_Os01g15220	8.94452	-3.44574	1.08256	0.00022343	0.00246434	None	None	None
OS01G0256500	LOC_Os01g15270	93278	-1.8967	0.373785	8.1e-08	1.84e-06	None	None	None
OS01G0256600	LOC_Os01g15290	735.065	-2.74625	0.297671	3.28e-21	3.27e-19	GO:0005840	C	ribosome
OS01G0256600	LOC_Os01g15290	735.065	-2.74625	0.297671	3.28e-21	3.27e-19	GO:0009987	P	cellular process
OS01G0256600	LOC_Os01g15290	735.065	-2.74625	0.297671	3.28e-21	3.27e-19	GO:0006412	P	translation
OS01G0256600	LOC_Os01g15290	735.065	-2.74625	0.297671	3.28e-21	3.27e-19	GO:0005622	C	intracellular
OS01G0256600	LOC_Os01g15290	735.065	-2.74625	0.297671	3.28e-21	3.27e-19	GO:0005198	F	structural molecule activity
OS01G0256600	LOC_Os01g15290	735.065	-2.74625	0.297671	3.28e-21	3.27e-19	GO:0005840	C	ribosome
OS01G0256600	LOC_Os01g15290	735.065	-2.74625	0.297671	3.28e-21	3.27e-19	GO:0009987	P	cellular process
OS01G0256600	LOC_Os01g15290	735.065	-2.74625	0.297671	3.28e-21	3.27e-19	GO:0006412	P	translation
OS01G0256600	LOC_Os01g15290	735.065	-2.74625	0.297671	3.28e-21	3.27e-19	GO:0005622	C	intracellular
OS01G0256600	LOC_Os01g15290	735.065	-2.74625	0.297671	3.28e-21	3.27e-19	GO:0005198	F	structural molecule activity
OS01G0256800	LOC_Os01g15300	372.394	-1.68119	0.55603	0.000568978	0.00543621	None	None	None
OS01G0257900	None	207.472	-1.64674	0.324495	1.03e-07	2.3e-06	None	None	None
OS01G0258600	LOC_Os01g15448	135.063	-4.61399	0.450419	5.06e-26	8.46e-24	GO:0003674	F	molecular_function
OS01G0258600	LOC_Os01g15448	135.063	-4.61399	0.450419	5.06e-26	8.46e-24	GO:0005575	C	cellular_component
OS01G0258600	LOC_Os01g15448	135.063	-4.61399	0.450419	5.06e-26	8.46e-24	GO:0008150	P	biological_process
OS01G0258700	LOC_Os01g15460	3469.64	-0.378545	0.143976	0.00782401	0.044067	GO:0005488	F	binding
OS01G0258700	LOC_Os01g15460	3469.64	-0.378545	0.143976	0.00782401	0.044067	GO:0008150	P	biological_process
OS01G0258700	LOC_Os01g15460	3469.64	-0.378545	0.143976	0.00782401	0.044067	GO:0003676	F	nucleic acid binding
OS01G0258700	LOC_Os01g15460	3469.64	-0.378545	0.143976	0.00782401	0.044067	GO:0005488	F	binding
OS01G0258700	LOC_Os01g15460	3469.64	-0.378545	0.143976	0.00782401	0.044067	GO:0008150	P	biological_process
OS01G0258700	LOC_Os01g15460	3469.64	-0.378545	0.143976	0.00782401	0.044067	GO:0003676	F	nucleic acid binding
OS01G0258700	LOC_Os01g15460	3469.64	-0.378545	0.143976	0.00782401	0.044067	GO:0005488	F	binding
OS01G0258700	LOC_Os01g15460	3469.64	-0.378545	0.143976	0.00782401	0.044067	GO:0008150	P	biological_process
OS01G0258700	LOC_Os01g15460	3469.64	-0.378545	0.143976	0.00782401	0.044067	GO:0003676	F	nucleic acid binding
OS01G0259933	None	97.3264	-2.96909	0.596449	6.02e-08	1.38e-06	None	None	None
OS01G0261600	None	4.19462	-5.26884	2.90211	0.000999493	0.00864425	None	None	None
OS01G0262401	None	152.143	-12.0153	3.26508	9.55e-17	6.09e-15	None	None	None
OS01G0263000	LOC_Os01g15810	29.649	1.80645	0.948279	0.0088871	0.048414	GO:0005623	C	cell
OS01G0263000	LOC_Os01g15810	29.649	1.80645	0.948279	0.0088871	0.048414	GO:0006950	P	response to stress
OS01G0263000	LOC_Os01g15810	29.649	1.80645	0.948279	0.0088871	0.048414	GO:0005488	F	binding
OS01G0263000	LOC_Os01g15810	29.649	1.80645	0.948279	0.0088871	0.048414	GO:0003824	F	catalytic activity
OS01G0263000	LOC_Os01g15810	29.649	1.80645	0.948279	0.0088871	0.048414	GO:0008152	P	metabolic process
OS01G0263300	LOC_Os01g15830	1243	0.978263	0.32462	0.00140066	0.011403	GO:0005623	C	cell
OS01G0263300	LOC_Os01g15830	1243	0.978263	0.32462	0.00140066	0.011403	GO:0006950	P	response to stress
OS01G0263300	LOC_Os01g15830	1243	0.978263	0.32462	0.00140066	0.011403	GO:0005488	F	binding
OS01G0263300	LOC_Os01g15830	1243	0.978263	0.32462	0.00140066	0.011403	GO:0003824	F	catalytic activity
OS01G0263300	LOC_Os01g15830	1243	0.978263	0.32462	0.00140066	0.011403	GO:0008152	P	metabolic process
OS01G0263600	LOC_Os01g15860	152.778	-1.59352	0.711071	0.00547929	0.0336864	GO:0005634	C	nucleus
OS01G0263600	LOC_Os01g15860	152.778	-1.59352	0.711071	0.00547929	0.0336864	GO:0006139	P	nucleobase, nucleoside, nucleotide and nucleic acid metabolic process
OS01G0263600	LOC_Os01g15860	152.778	-1.59352	0.711071	0.00547929	0.0336864	GO:0006950	P	response to stress
OS01G0263600	LOC_Os01g15860	152.778	-1.59352	0.711071	0.00547929	0.0336864	GO:0009628	P	response to abiotic stimulus
OS01G0263600	LOC_Os01g15860	152.778	-1.59352	0.711071	0.00547929	0.0336864	GO:0005488	F	binding
OS01G0266200	LOC_Os01g16124	331.4	5.42563	0.310095	1.28e-69	2.15e-66	None	None	None
OS01G0267300	LOC_Os01g16200	49.1039	1.32767	0.575604	0.00705752	0.0408251	GO:0005576	C	extracellular region
OS01G0267300	LOC_Os01g16200	49.1039	1.32767	0.575604	0.00705752	0.0408251	GO:0008152	P	metabolic process
OS01G0267300	LOC_Os01g16200	49.1039	1.32767	0.575604	0.00705752	0.0408251	GO:0030234	F	enzyme regulator activity
OS01G0267300	LOC_Os01g16200	49.1039	1.32767	0.575604	0.00705752	0.0408251	GO:0019538	P	protein metabolic process
OS01G0267300	LOC_Os01g16200	49.1039	1.32767	0.575604	0.00705752	0.0408251	GO:0008150	P	biological_process
OS01G0269550	None	19.6696	3.9723	1.05903	1.37e-05	0.000207116	None	None	None
OS01G0278900	LOC_Os01g17150	405.723	1.87006	0.525241	7.53e-05	0.000948201	None	None	None
OS01G0279100	LOC_Os01g17170	1712.6	2.53087	0.61634	5.13e-06	8.41e-05	GO:0003677	F	DNA binding
OS01G0279100	LOC_Os01g17170	1712.6	2.53087	0.61634	5.13e-06	8.41e-05	GO:0016020	C	membrane
OS01G0279100	LOC_Os01g17170	1712.6	2.53087	0.61634	5.13e-06	8.41e-05	GO:0009536	C	plastid
OS01G0279100	LOC_Os01g17170	1712.6	2.53087	0.61634	5.13e-06	8.41e-05	GO:0009579	C	thylakoid
OS01G0279100	LOC_Os01g17170	1712.6	2.53087	0.61634	5.13e-06	8.41e-05	GO:0008152	P	metabolic process
OS01G0279100	LOC_Os01g17170	1712.6	2.53087	0.61634	5.13e-06	8.41e-05	GO:0003824	F	catalytic activity
OS01G0279100	LOC_Os01g17170	1712.6	2.53087	0.61634	5.13e-06	8.41e-05	GO:0009058	P	biosynthetic process
OS01G0279100	LOC_Os01g17170	1712.6	2.53087	0.61634	5.13e-06	8.41e-05	GO:0009987	P	cellular process
OS01G0279100	LOC_Os01g17170	1712.6	2.53087	0.61634	5.13e-06	8.41e-05	GO:0015979	P	photosynthesis
OS01G0279100	LOC_Os01g17170	1712.6	2.53087	0.61634	5.13e-06	8.41e-05	GO:0003677	F	DNA binding
OS01G0279100	LOC_Os01g17170	1712.6	2.53087	0.61634	5.13e-06	8.41e-05	GO:0016020	C	membrane
OS01G0279100	LOC_Os01g17170	1712.6	2.53087	0.61634	5.13e-06	8.41e-05	GO:0009536	C	plastid
OS01G0279100	LOC_Os01g17170	1712.6	2.53087	0.61634	5.13e-06	8.41e-05	GO:0009579	C	thylakoid
OS01G0279100	LOC_Os01g17170	1712.6	2.53087	0.61634	5.13e-06	8.41e-05	GO:0008152	P	metabolic process
OS01G0279100	LOC_Os01g17170	1712.6	2.53087	0.61634	5.13e-06	8.41e-05	GO:0003824	F	catalytic activity
OS01G0279100	LOC_Os01g17170	1712.6	2.53087	0.61634	5.13e-06	8.41e-05	GO:0009058	P	biosynthetic process
OS01G0279100	LOC_Os01g17170	1712.6	2.53087	0.61634	5.13e-06	8.41e-05	GO:0009987	P	cellular process
OS01G0279100	LOC_Os01g17170	1712.6	2.53087	0.61634	5.13e-06	8.41e-05	GO:0015979	P	photosynthesis
OS01G0280200	LOC_Os01g17300	17.6473	9.00468	2.78733	6.14e-12	2.36e-10	None	None	None
OS01G0281200	LOC_Os01g17402	19.37	0.990596	0.403568	0.00744668	0.0425702	GO:0008152	P	metabolic process
OS01G0281200	LOC_Os01g17402	19.37	0.990596	0.403568	0.00744668	0.0425702	GO:0009987	P	cellular process
OS01G0281200	LOC_Os01g17402	19.37	0.990596	0.403568	0.00744668	0.0425702	GO:0006950	P	response to stress
OS01G0281200	LOC_Os01g17402	19.37	0.990596	0.403568	0.00744668	0.0425702	GO:0009628	P	response to abiotic stimulus
OS01G0281200	LOC_Os01g17402	19.37	0.990596	0.403568	0.00744668	0.0425702	GO:0030234	F	enzyme regulator activity
OS01G0281200	LOC_Os01g17402	19.37	0.990596	0.403568	0.00744668	0.0425702	GO:0007049	P	cell cycle
OS01G0281200	LOC_Os01g17402	19.37	0.990596	0.403568	0.00744668	0.0425702	GO:0005737	C	cytoplasm
OS01G0281200	LOC_Os01g17402	19.37	0.990596	0.403568	0.00744668	0.0425702	GO:0008152	P	metabolic process
OS01G0281200	LOC_Os01g17402	19.37	0.990596	0.403568	0.00744668	0.0425702	GO:0009987	P	cellular process
OS01G0281200	LOC_Os01g17402	19.37	0.990596	0.403568	0.00744668	0.0425702	GO:0006950	P	response to stress
OS01G0281200	LOC_Os01g17402	19.37	0.990596	0.403568	0.00744668	0.0425702	GO:0009628	P	response to abiotic stimulus
OS01G0281200	LOC_Os01g17402	19.37	0.990596	0.403568	0.00744668	0.0425702	GO:0030234	F	enzyme regulator activity
OS01G0281200	LOC_Os01g17402	19.37	0.990596	0.403568	0.00744668	0.0425702	GO:0007049	P	cell cycle
OS01G0281200	LOC_Os01g17402	19.37	0.990596	0.403568	0.00744668	0.0425702	GO:0005737	C	cytoplasm
OS01G0288200	LOC_Os01g18450	194.258	1.7534	0.542532	0.000276238	0.00293402	GO:0003674	F	molecular_function
OS01G0288200	LOC_Os01g18450	194.258	1.7534	0.542532	0.000276238	0.00293402	GO:0005575	C	cellular_component
OS01G0288200	LOC_Os01g18450	194.258	1.7534	0.542532	0.000276238	0.00293402	GO:0008150	P	biological_process
OS01G0293000	LOC_Os01g18860	5942.98	0.599552	0.167817	0.000289014	0.00305137	GO:0016020	C	membrane
OS01G0293000	LOC_Os01g18860	5942.98	0.599552	0.167817	0.000289014	0.00305137	GO:0008152	P	metabolic process
OS01G0293000	LOC_Os01g18860	5942.98	0.599552	0.167817	0.000289014	0.00305137	GO:0009987	P	cellular process
OS01G0293000	LOC_Os01g18860	5942.98	0.599552	0.167817	0.000289014	0.00305137	GO:0009058	P	biosynthetic process
OS01G0293000	LOC_Os01g18860	5942.98	0.599552	0.167817	0.000289014	0.00305137	GO:0008150	P	biological_process
OS01G0293000	LOC_Os01g18860	5942.98	0.599552	0.167817	0.000289014	0.00305137	GO:0005618	C	cell wall
OS01G0293000	LOC_Os01g18860	5942.98	0.599552	0.167817	0.000289014	0.00305137	GO:0005829	C	cytosol
OS01G0293000	LOC_Os01g18860	5942.98	0.599552	0.167817	0.000289014	0.00305137	GO:0006950	P	response to stress
OS01G0293000	LOC_Os01g18860	5942.98	0.599552	0.167817	0.000289014	0.00305137	GO:0009628	P	response to abiotic stimulus
OS01G0293000	LOC_Os01g18860	5942.98	0.599552	0.167817	0.000289014	0.00305137	GO:0016740	F	transferase activity
OS01G0293000	LOC_Os01g18860	5942.98	0.599552	0.167817	0.000289014	0.00305137	GO:0005886	C	plasma membrane
OS01G0293000	LOC_Os01g18860	5942.98	0.599552	0.167817	0.000289014	0.00305137	GO:0006139	P	nucleobase, nucleoside, nucleotide and nucleic acid metabolic process
OS01G0293000	LOC_Os01g18860	5942.98	0.599552	0.167817	0.000289014	0.00305137	GO:0016020	C	membrane
OS01G0293000	LOC_Os01g18860	5942.98	0.599552	0.167817	0.000289014	0.00305137	GO:0008152	P	metabolic process
OS01G0293000	LOC_Os01g18860	5942.98	0.599552	0.167817	0.000289014	0.00305137	GO:0009987	P	cellular process
OS01G0293000	LOC_Os01g18860	5942.98	0.599552	0.167817	0.000289014	0.00305137	GO:0009058	P	biosynthetic process
OS01G0293000	LOC_Os01g18860	5942.98	0.599552	0.167817	0.000289014	0.00305137	GO:0008150	P	biological_process
OS01G0293000	LOC_Os01g18860	5942.98	0.599552	0.167817	0.000289014	0.00305137	GO:0005618	C	cell wall
OS01G0293000	LOC_Os01g18860	5942.98	0.599552	0.167817	0.000289014	0.00305137	GO:0005829	C	cytosol
OS01G0293000	LOC_Os01g18860	5942.98	0.599552	0.167817	0.000289014	0.00305137	GO:0006950	P	response to stress
OS01G0293000	LOC_Os01g18860	5942.98	0.599552	0.167817	0.000289014	0.00305137	GO:0009628	P	response to abiotic stimulus
OS01G0293000	LOC_Os01g18860	5942.98	0.599552	0.167817	0.000289014	0.00305137	GO:0016740	F	transferase activity
OS01G0293000	LOC_Os01g18860	5942.98	0.599552	0.167817	0.000289014	0.00305137	GO:0005886	C	plasma membrane
OS01G0293000	LOC_Os01g18860	5942.98	0.599552	0.167817	0.000289014	0.00305137	GO:0006139	P	nucleobase, nucleoside, nucleotide and nucleic acid metabolic process
OS01G0298301	None	102.155	1.11382	0.440705	0.00525637	0.0327173	None	None	None
OS01G0302250	None	36.1232	1.43242	0.462185	0.000626963	0.0058798	None	None	None
OS01G0303000	LOC_Os01g19740	33.0505	2.93105	1.86017	0.00447107	0.0288399	GO:0009058	P	biosynthetic process
OS01G0303000	LOC_Os01g19740	33.0505	2.93105	1.86017	0.00447107	0.0288399	GO:0005975	P	carbohydrate metabolic process
OS01G0303000	LOC_Os01g19740	33.0505	2.93105	1.86017	0.00447107	0.0288399	GO:0015979	P	photosynthesis
OS01G0303000	LOC_Os01g19740	33.0505	2.93105	1.86017	0.00447107	0.0288399	GO:0003674	F	molecular_function
OS01G0303000	LOC_Os01g19740	33.0505	2.93105	1.86017	0.00447107	0.0288399	GO:0005515	F	protein binding
OS01G0303000	LOC_Os01g19740	33.0505	2.93105	1.86017	0.00447107	0.0288399	GO:0009536	C	plastid
OS01G0304400	LOC_Os01g19880	176.538	-1.10731	2.50759	7.12e-05	0.000900932	GO:0003674	F	molecular_function
OS01G0304400	LOC_Os01g19880	176.538	-1.10731	2.50759	7.12e-05	0.000900932	GO:0005575	C	cellular_component
OS01G0304400	LOC_Os01g19880	176.538	-1.10731	2.50759	7.12e-05	0.000900932	GO:0009058	P	biosynthetic process
OS01G0304400	LOC_Os01g19880	176.538	-1.10731	2.50759	7.12e-05	0.000900932	GO:0006464	P	protein modification process
OS01G0305900	LOC_Os01g19970	796.903	-1.42512	0.590195	0.00435668	0.0282322	GO:0009719	P	response to endogenous stimulus
OS01G0305900	LOC_Os01g19970	796.903	-1.42512	0.590195	0.00435668	0.0282322	GO:0003677	F	DNA binding
OS01G0305900	LOC_Os01g19970	796.903	-1.42512	0.590195	0.00435668	0.0282322	GO:0009058	P	biosynthetic process
OS01G0305900	LOC_Os01g19970	796.903	-1.42512	0.590195	0.00435668	0.0282322	GO:0006139	P	nucleobase, nucleoside, nucleotide and nucleic acid metabolic process
OS01G0305900	LOC_Os01g19970	796.903	-1.42512	0.590195	0.00435668	0.0282322	GO:0009987	P	cellular process
OS01G0305900	LOC_Os01g19970	796.903	-1.42512	0.590195	0.00435668	0.0282322	GO:0019748	P	secondary metabolic process
OS01G0305900	LOC_Os01g19970	796.903	-1.42512	0.590195	0.00435668	0.0282322	GO:0003700	F	sequence-specific DNA binding transcription factor activity
OS01G0306100	LOC_Os01g19990	35.2462	2.34033	0.559042	4.32e-06	7.18e-05	GO:0006412	P	translation
OS01G0306100	LOC_Os01g19990	35.2462	2.34033	0.559042	4.32e-06	7.18e-05	GO:0008135	F	translation factor activity, nucleic acid binding
OS01G0306100	LOC_Os01g19990	35.2462	2.34033	0.559042	4.32e-06	7.18e-05	GO:0008150	P	biological_process
OS01G0306400	LOC_Os01g20030	86.2491	-4.47472	1.13093	4.26e-06	7.09e-05	GO:0005623	C	cell
OS01G0306400	LOC_Os01g20030	86.2491	-4.47472	1.13093	4.26e-06	7.09e-05	GO:0003674	F	molecular_function
OS01G0306400	LOC_Os01g20030	86.2491	-4.47472	1.13093	4.26e-06	7.09e-05	GO:0005515	F	protein binding
OS01G0306400	LOC_Os01g20030	86.2491	-4.47472	1.13093	4.26e-06	7.09e-05	GO:0008150	P	biological_process
OS01G0307686	LOC_Os01g20206	78.3733	-3.22756	1.28955	0.000627365	0.00588027	GO:0008150	P	biological_process
OS01G0307686	LOC_Os01g20206	78.3733	-3.22756	1.28955	0.000627365	0.00588027	GO:0016740	F	transferase activity
OS01G0307686	LOC_Os01g20206	78.3733	-3.22756	1.28955	0.000627365	0.00588027	GO:0005739	C	mitochondrion
OS01G0307686	LOC_Os01g20206	78.3733	-3.22756	1.28955	0.000627365	0.00588027	GO:0008152	P	metabolic process
OS01G0307686	LOC_Os01g20206	78.3733	-3.22756	1.28955	0.000627365	0.00588027	GO:0009987	P	cellular process
OS01G0309451	None	7.79179	7.53234	2.69055	5.98e-08	1.37e-06	None	None	None
OS01G0310550	None	74.0927	-0.977027	0.41076	0.00909051	0.0491821	None	None	None
OS01G0311300	None	31.2938	9.9757	2.89939	8.72e-14	4.12e-12	None	None	None
OS01G0312500	LOC_Os01g21034	4927.72	1.17388	0.498574	0.00796972	0.0446177	GO:0005618	C	cell wall
OS01G0312500	LOC_Os01g21034	4927.72	1.17388	0.498574	0.00796972	0.0446177	GO:0008152	P	metabolic process
OS01G0312500	LOC_Os01g21034	4927.72	1.17388	0.498574	0.00796972	0.0446177	GO:0005576	C	extracellular region
OS01G0312500	LOC_Os01g21034	4927.72	1.17388	0.498574	0.00796972	0.0446177	GO:0016787	F	hydrolase activity
OS01G0312500	LOC_Os01g21034	4927.72	1.17388	0.498574	0.00796972	0.0446177	GO:0008150	P	biological_process
OS01G0312500	LOC_Os01g21034	4927.72	1.17388	0.498574	0.00796972	0.0446177	GO:0005576	C	extracellular region
OS01G0312500	LOC_Os01g21034	4927.72	1.17388	0.498574	0.00796972	0.0446177	GO:0008152	P	metabolic process
OS01G0312500	LOC_Os01g21034	4927.72	1.17388	0.498574	0.00796972	0.0446177	GO:0005618	C	cell wall
OS01G0312500	LOC_Os01g21034	4927.72	1.17388	0.498574	0.00796972	0.0446177	GO:0009607	P	response to biotic stimulus
OS01G0312500	LOC_Os01g21034	4927.72	1.17388	0.498574	0.00796972	0.0446177	GO:0016787	F	hydrolase activity
OS01G0312500	LOC_Os01g21034	4927.72	1.17388	0.498574	0.00796972	0.0446177	GO:0005886	C	plasma membrane
OS01G0312500	LOC_Os01g21034	4927.72	1.17388	0.498574	0.00796972	0.0446177	GO:0005737	C	cytoplasm
OS01G0312500	LOC_Os01g21034	4927.72	1.17388	0.498574	0.00796972	0.0446177	GO:0005576	C	extracellular region
OS01G0312500	LOC_Os01g21034	4927.72	1.17388	0.498574	0.00796972	0.0446177	GO:0008152	P	metabolic process
OS01G0312500	LOC_Os01g21034	4927.72	1.17388	0.498574	0.00796972	0.0446177	GO:0005618	C	cell wall
OS01G0312500	LOC_Os01g21034	4927.72	1.17388	0.498574	0.00796972	0.0446177	GO:0009607	P	response to biotic stimulus
OS01G0312500	LOC_Os01g21034	4927.72	1.17388	0.498574	0.00796972	0.0446177	GO:0016787	F	hydrolase activity
OS01G0312500	LOC_Os01g21034	4927.72	1.17388	0.498574	0.00796972	0.0446177	GO:0005886	C	plasma membrane
OS01G0312500	LOC_Os01g21034	4927.72	1.17388	0.498574	0.00796972	0.0446177	GO:0005737	C	cytoplasm
OS01G0313600	LOC_Os01g21135	512.93	3.98184	1.11463	1.99e-05	0.000290075	None	None	None
OS01G0314000	LOC_Os01g21144	89.4628	-0.979575	0.322875	0.00135302	0.0111005	None	None	None
OS01G0314100	LOC_Os01g21160	1759.95	-0.756639	0.27209	0.00370974	0.0248754	GO:0008152	P	metabolic process
OS01G0314100	LOC_Os01g21160	1759.95	-0.756639	0.27209	0.00370974	0.0248754	GO:0016740	F	transferase activity
OS01G0314100	LOC_Os01g21160	1759.95	-0.756639	0.27209	0.00370974	0.0248754	GO:0009628	P	response to abiotic stimulus
OS01G0314100	LOC_Os01g21160	1759.95	-0.756639	0.27209	0.00370974	0.0248754	GO:0008150	P	biological_process
OS01G0314100	LOC_Os01g21160	1759.95	-0.756639	0.27209	0.00370974	0.0248754	GO:0003824	F	catalytic activity
OS01G0314100	LOC_Os01g21160	1759.95	-0.756639	0.27209	0.00370974	0.0248754	GO:0005488	F	binding
OS01G0314100	LOC_Os01g21160	1759.95	-0.756639	0.27209	0.00370974	0.0248754	GO:0005739	C	mitochondrion
OS01G0314100	LOC_Os01g21160	1759.95	-0.756639	0.27209	0.00370974	0.0248754	GO:0008152	P	metabolic process
OS01G0314100	LOC_Os01g21160	1759.95	-0.756639	0.27209	0.00370974	0.0248754	GO:0016740	F	transferase activity
OS01G0314100	LOC_Os01g21160	1759.95	-0.756639	0.27209	0.00370974	0.0248754	GO:0009628	P	response to abiotic stimulus
OS01G0314100	LOC_Os01g21160	1759.95	-0.756639	0.27209	0.00370974	0.0248754	GO:0008150	P	biological_process
OS01G0314100	LOC_Os01g21160	1759.95	-0.756639	0.27209	0.00370974	0.0248754	GO:0003824	F	catalytic activity
OS01G0314100	LOC_Os01g21160	1759.95	-0.756639	0.27209	0.00370974	0.0248754	GO:0005488	F	binding
OS01G0314100	LOC_Os01g21160	1759.95	-0.756639	0.27209	0.00370974	0.0248754	GO:0005739	C	mitochondrion
OS01G0314100	LOC_Os01g21160	1759.95	-0.756639	0.27209	0.00370974	0.0248754	GO:0008152	P	metabolic process
OS01G0314100	LOC_Os01g21160	1759.95	-0.756639	0.27209	0.00370974	0.0248754	GO:0016740	F	transferase activity
OS01G0314100	LOC_Os01g21160	1759.95	-0.756639	0.27209	0.00370974	0.0248754	GO:0009628	P	response to abiotic stimulus
OS01G0314100	LOC_Os01g21160	1759.95	-0.756639	0.27209	0.00370974	0.0248754	GO:0008150	P	biological_process
OS01G0314100	LOC_Os01g21160	1759.95	-0.756639	0.27209	0.00370974	0.0248754	GO:0003824	F	catalytic activity
OS01G0314100	LOC_Os01g21160	1759.95	-0.756639	0.27209	0.00370974	0.0248754	GO:0005488	F	binding
OS01G0314100	LOC_Os01g21160	1759.95	-0.756639	0.27209	0.00370974	0.0248754	GO:0005739	C	mitochondrion
OS01G0314100	LOC_Os01g21160	1759.95	-0.756639	0.27209	0.00370974	0.0248754	GO:0008152	P	metabolic process
OS01G0314100	LOC_Os01g21160	1759.95	-0.756639	0.27209	0.00370974	0.0248754	GO:0016740	F	transferase activity
OS01G0314100	LOC_Os01g21160	1759.95	-0.756639	0.27209	0.00370974	0.0248754	GO:0009628	P	response to abiotic stimulus
OS01G0314100	LOC_Os01g21160	1759.95	-0.756639	0.27209	0.00370974	0.0248754	GO:0008150	P	biological_process
OS01G0314100	LOC_Os01g21160	1759.95	-0.756639	0.27209	0.00370974	0.0248754	GO:0003824	F	catalytic activity
OS01G0314100	LOC_Os01g21160	1759.95	-0.756639	0.27209	0.00370974	0.0248754	GO:0005488	F	binding
OS01G0314100	LOC_Os01g21160	1759.95	-0.756639	0.27209	0.00370974	0.0248754	GO:0005739	C	mitochondrion
OS01G0314800	LOC_Os01g21250	2659.64	-3.29342	1.77869	0.00214109	0.0160889	GO:0006950	P	response to stress
OS01G0314800	LOC_Os01g21250	2659.64	-3.29342	1.77869	0.00214109	0.0160889	GO:0003674	F	molecular_function
OS01G0314800	LOC_Os01g21250	2659.64	-3.29342	1.77869	0.00214109	0.0160889	GO:0009628	P	response to abiotic stimulus
OS01G0314800	LOC_Os01g21250	2659.64	-3.29342	1.77869	0.00214109	0.0160889	GO:0009790	P	embryo development
OS01G0314800	LOC_Os01g21250	2659.64	-3.29342	1.77869	0.00214109	0.0160889	GO:0009991	P	response to extracellular stimulus
OS01G0314800	LOC_Os01g21250	2659.64	-3.29342	1.77869	0.00214109	0.0160889	GO:0007154	P	cell communication
OS01G0316100	LOC_Os01g21380	7.03155	-2.22899	1.24977	0.00913993	0.0493271	GO:0005575	C	cellular_component
OS01G0316100	LOC_Os01g21380	7.03155	-2.22899	1.24977	0.00913993	0.0493271	GO:0003824	F	catalytic activity
OS01G0316100	LOC_Os01g21380	7.03155	-2.22899	1.24977	0.00913993	0.0493271	GO:0008152	P	metabolic process
OS01G0316100	LOC_Os01g21380	7.03155	-2.22899	1.24977	0.00913993	0.0493271	GO:0009987	P	cellular process
OS01G0316600	LOC_Os01g21420	60.5355	-0.994759	0.350782	0.00245142	0.0179429	GO:0003723	F	RNA binding
OS01G0316600	LOC_Os01g21420	60.5355	-0.994759	0.350782	0.00245142	0.0179429	GO:0005730	C	nucleolus
OS01G0316600	LOC_Os01g21420	60.5355	-0.994759	0.350782	0.00245142	0.0179429	GO:0000166	F	nucleotide binding
OS01G0316600	LOC_Os01g21420	60.5355	-0.994759	0.350782	0.00245142	0.0179429	GO:0005829	C	cytosol
OS01G0316600	LOC_Os01g21420	60.5355	-0.994759	0.350782	0.00245142	0.0179429	GO:0006139	P	nucleobase, nucleoside, nucleotide and nucleic acid metabolic process
OS01G0316600	LOC_Os01g21420	60.5355	-0.994759	0.350782	0.00245142	0.0179429	GO:0003676	F	nucleic acid binding
OS01G0317800	LOC_Os01g21560	823.684	-0.547098	0.205167	0.00633298	0.0376791	GO:0008152	P	metabolic process
OS01G0317800	LOC_Os01g21560	823.684	-0.547098	0.205167	0.00633298	0.0376791	GO:0003824	F	catalytic activity
OS01G0321900	LOC_Os01g21880	18.4949	2.78171	0.737903	1.94e-05	0.000284053	None	None	None
OS01G0322300	LOC_Os01g21900	5.14112	-2.82813	1.47756	0.00378075	0.0252758	GO:0016020	C	membrane
OS01G0322300	LOC_Os01g21900	5.14112	-2.82813	1.47756	0.00378075	0.0252758	GO:0008152	P	metabolic process
OS01G0322300	LOC_Os01g21900	5.14112	-2.82813	1.47756	0.00378075	0.0252758	GO:0016787	F	hydrolase activity
OS01G0322300	LOC_Os01g21900	5.14112	-2.82813	1.47756	0.00378075	0.0252758	GO:0009987	P	cellular process
OS01G0326000	LOC_Os01g22230	1791.34	0.8036	0.262282	0.00153256	0.0122539	GO:0005783	C	endoplasmic reticulum
OS01G0326000	LOC_Os01g22230	1791.34	0.8036	0.262282	0.00153256	0.0122539	GO:0005515	F	protein binding
OS01G0326000	LOC_Os01g22230	1791.34	0.8036	0.262282	0.00153256	0.0122539	GO:0006950	P	response to stress
OS01G0326000	LOC_Os01g22230	1791.34	0.8036	0.262282	0.00153256	0.0122539	GO:0009628	P	response to abiotic stimulus
OS01G0326000	LOC_Os01g22230	1791.34	0.8036	0.262282	0.00153256	0.0122539	GO:0003824	F	catalytic activity
OS01G0326000	LOC_Os01g22230	1791.34	0.8036	0.262282	0.00153256	0.0122539	GO:0008152	P	metabolic process
OS01G0326000	LOC_Os01g22230	1791.34	0.8036	0.262282	0.00153256	0.0122539	GO:0005783	C	endoplasmic reticulum
OS01G0326000	LOC_Os01g22230	1791.34	0.8036	0.262282	0.00153256	0.0122539	GO:0005515	F	protein binding
OS01G0326000	LOC_Os01g22230	1791.34	0.8036	0.262282	0.00153256	0.0122539	GO:0006950	P	response to stress
OS01G0326000	LOC_Os01g22230	1791.34	0.8036	0.262282	0.00153256	0.0122539	GO:0009628	P	response to abiotic stimulus
OS01G0326000	LOC_Os01g22230	1791.34	0.8036	0.262282	0.00153256	0.0122539	GO:0003824	F	catalytic activity
OS01G0326000	LOC_Os01g22230	1791.34	0.8036	0.262282	0.00153256	0.0122539	GO:0008152	P	metabolic process
OS01G0326100	LOC_Os01g22249	353.002	1.35208	0.469499	0.00138594	0.011308	GO:0005783	C	endoplasmic reticulum
OS01G0326100	LOC_Os01g22249	353.002	1.35208	0.469499	0.00138594	0.011308	GO:0005515	F	protein binding
OS01G0326100	LOC_Os01g22249	353.002	1.35208	0.469499	0.00138594	0.011308	GO:0006950	P	response to stress
OS01G0326100	LOC_Os01g22249	353.002	1.35208	0.469499	0.00138594	0.011308	GO:0009628	P	response to abiotic stimulus
OS01G0326100	LOC_Os01g22249	353.002	1.35208	0.469499	0.00138594	0.011308	GO:0003824	F	catalytic activity
OS01G0326100	LOC_Os01g22249	353.002	1.35208	0.469499	0.00138594	0.011308	GO:0008152	P	metabolic process
OS01G0326300	LOC_Os01g22249	3394.71	1.77653	0.596068	0.000625633	0.00586896	GO:0005783	C	endoplasmic reticulum
OS01G0326300	LOC_Os01g22249	3394.71	1.77653	0.596068	0.000625633	0.00586896	GO:0005515	F	protein binding
OS01G0326300	LOC_Os01g22249	3394.71	1.77653	0.596068	0.000625633	0.00586896	GO:0006950	P	response to stress
OS01G0326300	LOC_Os01g22249	3394.71	1.77653	0.596068	0.000625633	0.00586896	GO:0009628	P	response to abiotic stimulus
OS01G0326300	LOC_Os01g22249	3394.71	1.77653	0.596068	0.000625633	0.00586896	GO:0003824	F	catalytic activity
OS01G0326300	LOC_Os01g22249	3394.71	1.77653	0.596068	0.000625633	0.00586896	GO:0008152	P	metabolic process
OS01G0327100	LOC_Os01g22352	41.5863	1.95953	0.725518	0.00114192	0.00966929	GO:0005623	C	cell
OS01G0327100	LOC_Os01g22352	41.5863	1.95953	0.725518	0.00114192	0.00966929	GO:0006950	P	response to stress
OS01G0327100	LOC_Os01g22352	41.5863	1.95953	0.725518	0.00114192	0.00966929	GO:0005488	F	binding
OS01G0327100	LOC_Os01g22352	41.5863	1.95953	0.725518	0.00114192	0.00966929	GO:0003824	F	catalytic activity
OS01G0327100	LOC_Os01g22352	41.5863	1.95953	0.725518	0.00114192	0.00966929	GO:0008152	P	metabolic process
OS01G0327400	LOC_Os01g22370	832.179	1.61259	0.481137	0.000220759	0.00244129	GO:0005783	C	endoplasmic reticulum
OS01G0327400	LOC_Os01g22370	832.179	1.61259	0.481137	0.000220759	0.00244129	GO:0005515	F	protein binding
OS01G0327400	LOC_Os01g22370	832.179	1.61259	0.481137	0.000220759	0.00244129	GO:0006950	P	response to stress
OS01G0327400	LOC_Os01g22370	832.179	1.61259	0.481137	0.000220759	0.00244129	GO:0009628	P	response to abiotic stimulus
OS01G0327400	LOC_Os01g22370	832.179	1.61259	0.481137	0.000220759	0.00244129	GO:0003824	F	catalytic activity
OS01G0327400	LOC_Os01g22370	832.179	1.61259	0.481137	0.000220759	0.00244129	GO:0008152	P	metabolic process
OS01G0327900	LOC_Os01g22430	203.914	1.34327	0.218458	3.07e-10	9.57e-09	GO:0003674	F	molecular_function
OS01G0327900	LOC_Os01g22430	203.914	1.34327	0.218458	3.07e-10	9.57e-09	GO:0005575	C	cellular_component
OS01G0327900	LOC_Os01g22430	203.914	1.34327	0.218458	3.07e-10	9.57e-09	GO:0008150	P	biological_process
OS01G0328300	LOC_Os01g22480	173.337	1.63142	0.253383	3.4e-11	1.2e-09	GO:0003674	F	molecular_function
OS01G0328300	LOC_Os01g22480	173.337	1.63142	0.253383	3.4e-11	1.2e-09	GO:0005575	C	cellular_component
OS01G0328300	LOC_Os01g22480	173.337	1.63142	0.253383	3.4e-11	1.2e-09	GO:0008150	P	biological_process
OS01G0328300	LOC_Os01g22480	173.337	1.63142	0.253383	3.4e-11	1.2e-09	GO:0003674	F	molecular_function
OS01G0328300	LOC_Os01g22480	173.337	1.63142	0.253383	3.4e-11	1.2e-09	GO:0005575	C	cellular_component
OS01G0328300	LOC_Os01g22480	173.337	1.63142	0.253383	3.4e-11	1.2e-09	GO:0008150	P	biological_process
OS01G0329400	LOC_Os01g22600	1259.47	-1.80647	0.728588	0.00234511	0.017338	GO:0006810	P	transport
OS01G0329400	LOC_Os01g22600	1259.47	-1.80647	0.728588	0.00234511	0.017338	GO:0009987	P	cellular process
OS01G0329400	LOC_Os01g22600	1259.47	-1.80647	0.728588	0.00234511	0.017338	GO:0016020	C	membrane
OS01G0329400	LOC_Os01g22600	1259.47	-1.80647	0.728588	0.00234511	0.017338	GO:0005739	C	mitochondrion
OS01G0329400	LOC_Os01g22600	1259.47	-1.80647	0.728588	0.00234511	0.017338	GO:0005488	F	binding
OS01G0329800	LOC_Os01g22630	2068.92	-2.30176	0.547841	3.74e-06	6.3e-05	GO:0003674	F	molecular_function
OS01G0329800	LOC_Os01g22630	2068.92	-2.30176	0.547841	3.74e-06	6.3e-05	GO:0005575	C	cellular_component
OS01G0329800	LOC_Os01g22630	2068.92	-2.30176	0.547841	3.74e-06	6.3e-05	GO:0008150	P	biological_process
OS01G0329800	LOC_Os01g22630	2068.92	-2.30176	0.547841	3.74e-06	6.3e-05	GO:0003674	F	molecular_function
OS01G0329800	LOC_Os01g22630	2068.92	-2.30176	0.547841	3.74e-06	6.3e-05	GO:0005575	C	cellular_component
OS01G0329800	LOC_Os01g22630	2068.92	-2.30176	0.547841	3.74e-06	6.3e-05	GO:0008150	P	biological_process
OS01G0333600	LOC_Os01g23070	89.8775	1.57131	0.602759	0.00234316	0.0173318	GO:0003674	F	molecular_function
OS01G0333600	LOC_Os01g23070	89.8775	1.57131	0.602759	0.00234316	0.0173318	GO:0005575	C	cellular_component
OS01G0333600	LOC_Os01g23070	89.8775	1.57131	0.602759	0.00234316	0.0173318	GO:0008150	P	biological_process
OS01G0337500	LOC_Os01g23580	230.169	-3.6444	0.456889	1.62e-16	1.01e-14	GO:0016020	C	membrane
OS01G0337500	LOC_Os01g23580	230.169	-3.6444	0.456889	1.62e-16	1.01e-14	GO:0005768	C	endosome
OS01G0337500	LOC_Os01g23580	230.169	-3.6444	0.456889	1.62e-16	1.01e-14	GO:0006950	P	response to stress
OS01G0337500	LOC_Os01g23580	230.169	-3.6444	0.456889	1.62e-16	1.01e-14	GO:0009628	P	response to abiotic stimulus
OS01G0337500	LOC_Os01g23580	230.169	-3.6444	0.456889	1.62e-16	1.01e-14	GO:0005773	C	vacuole
OS01G0337500	LOC_Os01g23580	230.169	-3.6444	0.456889	1.62e-16	1.01e-14	GO:0006810	P	transport
OS01G0337500	LOC_Os01g23580	230.169	-3.6444	0.456889	1.62e-16	1.01e-14	GO:0009536	C	plastid
OS01G0337500	LOC_Os01g23580	230.169	-3.6444	0.456889	1.62e-16	1.01e-14	GO:0005739	C	mitochondrion
OS01G0337500	LOC_Os01g23580	230.169	-3.6444	0.456889	1.62e-16	1.01e-14	GO:0005886	C	plasma membrane
OS01G0337500	LOC_Os01g23580	230.169	-3.6444	0.456889	1.62e-16	1.01e-14	GO:0016787	F	hydrolase activity
OS01G0337500	LOC_Os01g23580	230.169	-3.6444	0.456889	1.62e-16	1.01e-14	GO:0005215	F	transporter activity
OS01G0337500	LOC_Os01g23580	230.169	-3.6444	0.456889	1.62e-16	1.01e-14	GO:0009987	P	cellular process
OS01G0337500	LOC_Os01g23580	230.169	-3.6444	0.456889	1.62e-16	1.01e-14	GO:0008152	P	metabolic process
OS01G0337500	LOC_Os01g23580	230.169	-3.6444	0.456889	1.62e-16	1.01e-14	GO:0007275	P	multicellular organismal development
OS01G0339500	LOC_Os01g23710	10.6726	1.77018	0.933813	0.00926552	0.0498434	None	None	None
OS01G0341000	LOC_Os01g23850	212.626	2.4661	0.595149	4.41e-06	7.33e-05	None	None	None
OS01G0343500	LOC_Os01g24090	45.5696	1.61429	0.679379	0.00406518	0.0267564	GO:0008150	P	biological_process
OS01G0343500	LOC_Os01g24090	45.5696	1.61429	0.679379	0.00406518	0.0267564	GO:0005488	F	binding
OS01G0343500	LOC_Os01g24090	45.5696	1.61429	0.679379	0.00406518	0.0267564	GO:0009536	C	plastid
OS01G0343500	LOC_Os01g24090	45.5696	1.61429	0.679379	0.00406518	0.0267564	GO:0008150	P	biological_process
OS01G0343500	LOC_Os01g24090	45.5696	1.61429	0.679379	0.00406518	0.0267564	GO:0005488	F	binding
OS01G0343500	LOC_Os01g24090	45.5696	1.61429	0.679379	0.00406518	0.0267564	GO:0009536	C	plastid
OS01G0347500	LOC_Os01g24550	52.4696	2.27548	0.854871	0.00093749	0.00820524	GO:0006950	P	response to stress
OS01G0347500	LOC_Os01g24550	52.4696	2.27548	0.854871	0.00093749	0.00820524	GO:0009607	P	response to biotic stimulus
OS01G0347500	LOC_Os01g24550	52.4696	2.27548	0.854871	0.00093749	0.00820524	GO:0019538	P	protein metabolic process
OS01G0347500	LOC_Os01g24550	52.4696	2.27548	0.854871	0.00093749	0.00820524	GO:0016787	F	hydrolase activity
OS01G0347500	LOC_Os01g24550	52.4696	2.27548	0.854871	0.00093749	0.00820524	GO:0007275	P	multicellular organismal development
OS01G0347500	LOC_Os01g24550	52.4696	2.27548	0.854871	0.00093749	0.00820524	GO:0005773	C	vacuole
OS01G0347500	LOC_Os01g24550	52.4696	2.27548	0.854871	0.00093749	0.00820524	GO:0009719	P	response to endogenous stimulus
OS01G0347500	LOC_Os01g24550	52.4696	2.27548	0.854871	0.00093749	0.00820524	GO:0008150	P	biological_process
OS01G0348800	LOC_Os01g24700	49372.1	2.05766	0.479391	3.09e-06	5.29e-05	None	None	None
OS01G0351100	LOC_Os01g24920	64.9839	1.86663	0.396222	5.58e-07	1.11e-05	GO:0005634	C	nucleus
OS01G0351100	LOC_Os01g24920	64.9839	1.86663	0.396222	5.58e-07	1.11e-05	GO:0016740	F	transferase activity
OS01G0351100	LOC_Os01g24920	64.9839	1.86663	0.396222	5.58e-07	1.11e-05	GO:0006464	P	protein modification process
OS01G0351100	LOC_Os01g24920	64.9839	1.86663	0.396222	5.58e-07	1.11e-05	GO:0003676	F	nucleic acid binding
OS01G0352100	LOC_Os01g25010	5.861	6.80328	2.77546	1.19e-05	0.00018233	GO:0005575	C	cellular_component
OS01G0352100	LOC_Os01g25010	5.861	6.80328	2.77546	1.19e-05	0.00018233	GO:0007275	P	multicellular organismal development
OS01G0352100	LOC_Os01g25010	5.861	6.80328	2.77546	1.19e-05	0.00018233	GO:0003824	F	catalytic activity
OS01G0352100	LOC_Os01g25010	5.861	6.80328	2.77546	1.19e-05	0.00018233	GO:0009058	P	biosynthetic process
OS01G0352100	LOC_Os01g25010	5.861	6.80328	2.77546	1.19e-05	0.00018233	GO:0009987	P	cellular process
OS01G0352100	LOC_Os01g25010	5.861	6.80328	2.77546	1.19e-05	0.00018233	GO:0019748	P	secondary metabolic process
OS01G0352100	LOC_Os01g25010	5.861	6.80328	2.77546	1.19e-05	0.00018233	GO:0008152	P	metabolic process
OS01G0353900	None	48.9676	2.42849	0.426849	1.88e-09	5.3e-08	None	None	None
OS01G0354200	LOC_Os01g25189	153.099	-1.18582	0.286422	1.53e-05	0.000228	GO:0005623	C	cell
OS01G0354200	LOC_Os01g25189	153.099	-1.18582	0.286422	1.53e-05	0.000228	GO:0016020	C	membrane
OS01G0354200	LOC_Os01g25189	153.099	-1.18582	0.286422	1.53e-05	0.000228	GO:0009058	P	biosynthetic process
OS01G0354200	LOC_Os01g25189	153.099	-1.18582	0.286422	1.53e-05	0.000228	GO:0006629	P	lipid metabolic process
OS01G0354200	LOC_Os01g25189	153.099	-1.18582	0.286422	1.53e-05	0.000228	GO:0003824	F	catalytic activity
OS01G0354200	LOC_Os01g25189	153.099	-1.18582	0.286422	1.53e-05	0.000228	GO:0008152	P	metabolic process
OS01G0354200	LOC_Os01g25189	153.099	-1.18582	0.286422	1.53e-05	0.000228	GO:0000003	P	reproduction
OS01G0354200	LOC_Os01g25189	153.099	-1.18582	0.286422	1.53e-05	0.000228	GO:0009791	P	post-embryonic development
OS01G0354200	LOC_Os01g25189	153.099	-1.18582	0.286422	1.53e-05	0.000228	GO:0009790	P	embryo development
OS01G0354200	LOC_Os01g25189	153.099	-1.18582	0.286422	1.53e-05	0.000228	GO:0005623	C	cell
OS01G0354200	LOC_Os01g25189	153.099	-1.18582	0.286422	1.53e-05	0.000228	GO:0016020	C	membrane
OS01G0354200	LOC_Os01g25189	153.099	-1.18582	0.286422	1.53e-05	0.000228	GO:0009058	P	biosynthetic process
OS01G0354200	LOC_Os01g25189	153.099	-1.18582	0.286422	1.53e-05	0.000228	GO:0006629	P	lipid metabolic process
OS01G0354200	LOC_Os01g25189	153.099	-1.18582	0.286422	1.53e-05	0.000228	GO:0003824	F	catalytic activity
OS01G0354200	LOC_Os01g25189	153.099	-1.18582	0.286422	1.53e-05	0.000228	GO:0008152	P	metabolic process
OS01G0354200	LOC_Os01g25189	153.099	-1.18582	0.286422	1.53e-05	0.000228	GO:0000003	P	reproduction
OS01G0354200	LOC_Os01g25189	153.099	-1.18582	0.286422	1.53e-05	0.000228	GO:0009791	P	post-embryonic development
OS01G0354200	LOC_Os01g25189	153.099	-1.18582	0.286422	1.53e-05	0.000228	GO:0009790	P	embryo development
OS01G0354200	LOC_Os01g25189	153.099	-1.18582	0.286422	1.53e-05	0.000228	GO:0005623	C	cell
OS01G0354200	LOC_Os01g25189	153.099	-1.18582	0.286422	1.53e-05	0.000228	GO:0016020	C	membrane
OS01G0354200	LOC_Os01g25189	153.099	-1.18582	0.286422	1.53e-05	0.000228	GO:0009058	P	biosynthetic process
OS01G0354200	LOC_Os01g25189	153.099	-1.18582	0.286422	1.53e-05	0.000228	GO:0006629	P	lipid metabolic process
OS01G0354200	LOC_Os01g25189	153.099	-1.18582	0.286422	1.53e-05	0.000228	GO:0003824	F	catalytic activity
OS01G0354200	LOC_Os01g25189	153.099	-1.18582	0.286422	1.53e-05	0.000228	GO:0008152	P	metabolic process
OS01G0354200	LOC_Os01g25189	153.099	-1.18582	0.286422	1.53e-05	0.000228	GO:0000003	P	reproduction
OS01G0354200	LOC_Os01g25189	153.099	-1.18582	0.286422	1.53e-05	0.000228	GO:0009791	P	post-embryonic development
OS01G0354200	LOC_Os01g25189	153.099	-1.18582	0.286422	1.53e-05	0.000228	GO:0009790	P	embryo development
OS01G0354200	LOC_Os01g25189	153.099	-1.18582	0.286422	1.53e-05	0.000228	GO:0005623	C	cell
OS01G0354200	LOC_Os01g25189	153.099	-1.18582	0.286422	1.53e-05	0.000228	GO:0016020	C	membrane
OS01G0354200	LOC_Os01g25189	153.099	-1.18582	0.286422	1.53e-05	0.000228	GO:0009058	P	biosynthetic process
OS01G0354200	LOC_Os01g25189	153.099	-1.18582	0.286422	1.53e-05	0.000228	GO:0006629	P	lipid metabolic process
OS01G0354200	LOC_Os01g25189	153.099	-1.18582	0.286422	1.53e-05	0.000228	GO:0003824	F	catalytic activity
OS01G0354200	LOC_Os01g25189	153.099	-1.18582	0.286422	1.53e-05	0.000228	GO:0008152	P	metabolic process
OS01G0354200	LOC_Os01g25189	153.099	-1.18582	0.286422	1.53e-05	0.000228	GO:0000003	P	reproduction
OS01G0354200	LOC_Os01g25189	153.099	-1.18582	0.286422	1.53e-05	0.000228	GO:0009791	P	post-embryonic development
OS01G0354200	LOC_Os01g25189	153.099	-1.18582	0.286422	1.53e-05	0.000228	GO:0009790	P	embryo development
OS01G0354200	LOC_Os01g25189	153.099	-1.18582	0.286422	1.53e-05	0.000228	GO:0005623	C	cell
OS01G0354200	LOC_Os01g25189	153.099	-1.18582	0.286422	1.53e-05	0.000228	GO:0016020	C	membrane
OS01G0354200	LOC_Os01g25189	153.099	-1.18582	0.286422	1.53e-05	0.000228	GO:0009058	P	biosynthetic process
OS01G0354200	LOC_Os01g25189	153.099	-1.18582	0.286422	1.53e-05	0.000228	GO:0006629	P	lipid metabolic process
OS01G0354200	LOC_Os01g25189	153.099	-1.18582	0.286422	1.53e-05	0.000228	GO:0003824	F	catalytic activity
OS01G0354200	LOC_Os01g25189	153.099	-1.18582	0.286422	1.53e-05	0.000228	GO:0008152	P	metabolic process
OS01G0354200	LOC_Os01g25189	153.099	-1.18582	0.286422	1.53e-05	0.000228	GO:0000003	P	reproduction
OS01G0354200	LOC_Os01g25189	153.099	-1.18582	0.286422	1.53e-05	0.000228	GO:0009791	P	post-embryonic development
OS01G0354200	LOC_Os01g25189	153.099	-1.18582	0.286422	1.53e-05	0.000228	GO:0009790	P	embryo development
OS01G0358300	LOC_Os01g25600	93.7194	1.27707	0.565404	0.00849549	0.0468046	GO:0016043	P	cellular component organization
OS01G0358300	LOC_Os01g25600	93.7194	1.27707	0.565404	0.00849549	0.0468046	GO:0006091	P	generation of precursor metabolites and energy
OS01G0358300	LOC_Os01g25600	93.7194	1.27707	0.565404	0.00849549	0.0468046	GO:0015979	P	photosynthesis
OS01G0358300	LOC_Os01g25600	93.7194	1.27707	0.565404	0.00849549	0.0468046	GO:0005488	F	binding
OS01G0358300	LOC_Os01g25600	93.7194	1.27707	0.565404	0.00849549	0.0468046	GO:0009536	C	plastid
OS01G0358300	LOC_Os01g25600	93.7194	1.27707	0.565404	0.00849549	0.0468046	GO:0016043	P	cellular component organization
OS01G0358300	LOC_Os01g25600	93.7194	1.27707	0.565404	0.00849549	0.0468046	GO:0006091	P	generation of precursor metabolites and energy
OS01G0358300	LOC_Os01g25600	93.7194	1.27707	0.565404	0.00849549	0.0468046	GO:0015979	P	photosynthesis
OS01G0358300	LOC_Os01g25600	93.7194	1.27707	0.565404	0.00849549	0.0468046	GO:0005488	F	binding
OS01G0358300	LOC_Os01g25600	93.7194	1.27707	0.565404	0.00849549	0.0468046	GO:0009536	C	plastid
OS01G0359400	LOC_Os01g25720	5.07698	-3.32815	1.36281	0.00147508	0.0118821	GO:0000166	F	nucleotide binding
OS01G0359400	LOC_Os01g25720	5.07698	-3.32815	1.36281	0.00147508	0.0118821	GO:0006950	P	response to stress
OS01G0359400	LOC_Os01g25720	5.07698	-3.32815	1.36281	0.00147508	0.0118821	GO:0000166	F	nucleotide binding
OS01G0359400	LOC_Os01g25720	5.07698	-3.32815	1.36281	0.00147508	0.0118821	GO:0006950	P	response to stress
OS01G0359400	LOC_Os01g25710	5.07698	-3.32815	1.36281	0.00147508	0.0118821	None	None	None
OS01G0359600	LOC_Os01g25740	16.2556	8.71838	2.90764	1.86e-08	4.55e-07	GO:0000166	F	nucleotide binding
OS01G0359600	LOC_Os01g25740	16.2556	8.71838	2.90764	1.86e-08	4.55e-07	GO:0006950	P	response to stress
OS01G0359800	LOC_Os01g25760	167.443	12.7528	3.1285	2.07e-24	3.04e-22	GO:0000166	F	nucleotide binding
OS01G0359800	LOC_Os01g25760	167.443	12.7528	3.1285	2.07e-24	3.04e-22	GO:0006950	P	response to stress
OS01G0360100	LOC_Os01g25810	11.649	8.28714	2.75137	1.62e-09	4.64e-08	GO:0000166	F	nucleotide binding
OS01G0360100	LOC_Os01g25810	11.649	8.28714	2.75137	1.62e-09	4.64e-08	GO:0006950	P	response to stress
OS01G0360600	LOC_Os01g25880	604.265	0.627581	0.203753	0.00164255	0.0129305	GO:0008152	P	metabolic process
OS01G0360600	LOC_Os01g25880	604.265	0.627581	0.203753	0.00164255	0.0129305	GO:0009987	P	cellular process
OS01G0360600	LOC_Os01g25880	604.265	0.627581	0.203753	0.00164255	0.0129305	GO:0000166	F	nucleotide binding
OS01G0360600	LOC_Os01g25880	604.265	0.627581	0.203753	0.00164255	0.0129305	GO:0016301	F	kinase activity
OS01G0360600	LOC_Os01g25880	604.265	0.627581	0.203753	0.00164255	0.0129305	GO:0005777	C	peroxisome
OS01G0360600	LOC_Os01g25880	604.265	0.627581	0.203753	0.00164255	0.0129305	GO:0006139	P	nucleobase, nucleoside, nucleotide and nucleic acid metabolic process
OS01G0360600	LOC_Os01g25880	604.265	0.627581	0.203753	0.00164255	0.0129305	GO:0009058	P	biosynthetic process
OS01G0360600	LOC_Os01g25880	604.265	0.627581	0.203753	0.00164255	0.0129305	GO:0005773	C	vacuole
OS01G0360600	LOC_Os01g25880	604.265	0.627581	0.203753	0.00164255	0.0129305	GO:0009536	C	plastid
OS01G0361000	LOC_Os01g25920	650.388	10.9374	0.839351	3.18e-37	1.26e-34	None	None	None
OS01G0361500	LOC_Os01g25990	66.7173	4.36649	0.841706	1.48e-08	3.66e-07	GO:0009536	C	plastid
OS01G0361500	LOC_Os01g25990	66.7173	4.36649	0.841706	1.48e-08	3.66e-07	GO:0008152	P	metabolic process
OS01G0361500	LOC_Os01g25990	66.7173	4.36649	0.841706	1.48e-08	3.66e-07	GO:0016740	F	transferase activity
OS01G0361500	LOC_Os01g25990	66.7173	4.36649	0.841706	1.48e-08	3.66e-07	GO:0003824	F	catalytic activity
OS01G0361500	LOC_Os01g25990	66.7173	4.36649	0.841706	1.48e-08	3.66e-07	GO:0009536	C	plastid
OS01G0361500	LOC_Os01g25990	66.7173	4.36649	0.841706	1.48e-08	3.66e-07	GO:0008152	P	metabolic process
OS01G0361500	LOC_Os01g25990	66.7173	4.36649	0.841706	1.48e-08	3.66e-07	GO:0016740	F	transferase activity
OS01G0361500	LOC_Os01g25990	66.7173	4.36649	0.841706	1.48e-08	3.66e-07	GO:0003824	F	catalytic activity
OS01G0362100	LOC_Os01g26039	819.499	0.90213	0.286238	0.00100074	0.00865282	GO:0009536	C	plastid
OS01G0362100	LOC_Os01g26039	819.499	0.90213	0.286238	0.00100074	0.00865282	GO:0008152	P	metabolic process
OS01G0362100	LOC_Os01g26039	819.499	0.90213	0.286238	0.00100074	0.00865282	GO:0016740	F	transferase activity
OS01G0362100	LOC_Os01g26039	819.499	0.90213	0.286238	0.00100074	0.00865282	GO:0003824	F	catalytic activity
OS01G0362400	LOC_Os01g26070	193.945	10.5434	1.32823	1.3e-23	1.68e-21	None	None	None
OS01G0362800	None	8.2798	5.65607	1.41589	4.97e-07	9.95e-06	None	None	None
OS01G0363300	LOC_Os01g26120	57.1767	1.17065	0.435597	0.00308828	0.0214849	GO:0003674	F	molecular_function
OS01G0363300	LOC_Os01g26120	57.1767	1.17065	0.435597	0.00308828	0.0214849	GO:0005575	C	cellular_component
OS01G0363300	LOC_Os01g26120	57.1767	1.17065	0.435597	0.00308828	0.0214849	GO:0008150	P	biological_process
OS01G0363600	None	36.2468	0.896537	0.330783	0.00402059	0.0265253	None	None	None
OS01G0364450	None	114.701	-8.34157	1.12751	4.11e-15	2.24e-13	None	None	None
OS01G0364800	LOC_Os01g26270	64.2141	-6.98277	0.914526	1.18e-14	6.1e-13	GO:0016301	F	kinase activity
OS01G0364800	LOC_Os01g26270	64.2141	-6.98277	0.914526	1.18e-14	6.1e-13	GO:0005515	F	protein binding
OS01G0364800	LOC_Os01g26270	64.2141	-6.98277	0.914526	1.18e-14	6.1e-13	GO:0006464	P	protein modification process
OS01G0364800	LOC_Os01g26270	64.2141	-6.98277	0.914526	1.18e-14	6.1e-13	GO:0005886	C	plasma membrane
OS01G0364800	LOC_Os01g26280	64.2141	-6.98277	0.914526	1.18e-14	6.1e-13	GO:0016301	F	kinase activity
OS01G0364800	LOC_Os01g26280	64.2141	-6.98277	0.914526	1.18e-14	6.1e-13	GO:0005515	F	protein binding
OS01G0364800	LOC_Os01g26280	64.2141	-6.98277	0.914526	1.18e-14	6.1e-13	GO:0006464	P	protein modification process
OS01G0364800	LOC_Os01g26280	64.2141	-6.98277	0.914526	1.18e-14	6.1e-13	GO:0005886	C	plasma membrane
OS01G0364900	LOC_Os01g26290	11.3102	3.77267	0.90177	3.2e-06	5.47e-05	None	None	None
OS01G0366100	LOC_Os01g26370	67.4812	11.2723	2.9908	3.24e-19	2.64e-17	None	None	None
OS01G0366300	LOC_Os01g26390	25.4466	9.5453	2.91776	4.36e-11	1.52e-09	GO:0008152	P	metabolic process
OS01G0366300	LOC_Os01g26390	25.4466	9.5453	2.91776	4.36e-11	1.52e-09	GO:0009987	P	cellular process
OS01G0366300	LOC_Os01g26390	25.4466	9.5453	2.91776	4.36e-11	1.52e-09	GO:0016301	F	kinase activity
OS01G0366300	LOC_Os01g26390	25.4466	9.5453	2.91776	4.36e-11	1.52e-09	GO:0005515	F	protein binding
OS01G0366300	LOC_Os01g26390	25.4466	9.5453	2.91776	4.36e-11	1.52e-09	GO:0000166	F	nucleotide binding
OS01G0366300	LOC_Os01g26390	25.4466	9.5453	2.91776	4.36e-11	1.52e-09	GO:0006464	P	protein modification process
OS01G0366300	LOC_Os01g26390	25.4466	9.5453	2.91776	4.36e-11	1.52e-09	GO:0005886	C	plasma membrane
OS01G0367100	LOC_Os01g26920	226.033	0.81309	0.329515	0.0088994	0.0484523	GO:0009536	C	plastid
OS01G0367100	LOC_Os01g26920	226.033	0.81309	0.329515	0.0088994	0.0484523	GO:0009536	C	plastid
OS01G0369600	None	3.08409	5.06314	3.05219	0.00200967	0.015224	None	None	None
OS01G0369700	LOC_Os01g27210	1891.76	-2.25149	0.720429	0.000224013	0.00246833	GO:0016740	F	transferase activity
OS01G0369700	LOC_Os01g27210	1891.76	-2.25149	0.720429	0.000224013	0.00246833	GO:0009056	P	catabolic process
OS01G0369700	LOC_Os01g27210	1891.76	-2.25149	0.720429	0.000224013	0.00246833	GO:0009987	P	cellular process
OS01G0369700	LOC_Os01g27210	1891.76	-2.25149	0.720429	0.000224013	0.00246833	GO:0019748	P	secondary metabolic process
OS01G0369700	LOC_Os01g27210	1891.76	-2.25149	0.720429	0.000224013	0.00246833	GO:0008152	P	metabolic process
OS01G0369700	LOC_Os01g27210	1891.76	-2.25149	0.720429	0.000224013	0.00246833	GO:0005737	C	cytoplasm
OS01G0369900	LOC_Os01g27230	534.949	-3.14771	0.865396	2.09e-05	0.00030254	GO:0006950	P	response to stress
OS01G0369900	LOC_Os01g27230	534.949	-3.14771	0.865396	2.09e-05	0.00030254	GO:0003824	F	catalytic activity
OS01G0369900	LOC_Os01g27230	534.949	-3.14771	0.865396	2.09e-05	0.00030254	GO:0008152	P	metabolic process
OS01G0369950	None	14.8586	-2.9384	2.01872	0.00451714	0.0290812	None	None	None
OS01G0370750	None	10.1753	7.3827	3.22975	0.000120992	0.00143641	None	None	None
OS01G0370900	LOC_Os01g27340	3.53768	5.72709	2.81799	0.000336781	0.00347589	GO:0016740	F	transferase activity
OS01G0370900	LOC_Os01g27340	3.53768	5.72709	2.81799	0.000336781	0.00347589	GO:0009056	P	catabolic process
OS01G0370900	LOC_Os01g27340	3.53768	5.72709	2.81799	0.000336781	0.00347589	GO:0009987	P	cellular process
OS01G0370900	LOC_Os01g27340	3.53768	5.72709	2.81799	0.000336781	0.00347589	GO:0019748	P	secondary metabolic process
OS01G0370900	LOC_Os01g27340	3.53768	5.72709	2.81799	0.000336781	0.00347589	GO:0008152	P	metabolic process
OS01G0370900	LOC_Os01g27340	3.53768	5.72709	2.81799	0.000336781	0.00347589	GO:0005737	C	cytoplasm
OS01G0371200	LOC_Os01g27360	704.538	-3.81573	0.402827	2.72e-22	3.08e-20	GO:0016740	F	transferase activity
OS01G0371200	LOC_Os01g27360	704.538	-3.81573	0.402827	2.72e-22	3.08e-20	GO:0009056	P	catabolic process
OS01G0371200	LOC_Os01g27360	704.538	-3.81573	0.402827	2.72e-22	3.08e-20	GO:0009987	P	cellular process
OS01G0371200	LOC_Os01g27360	704.538	-3.81573	0.402827	2.72e-22	3.08e-20	GO:0019748	P	secondary metabolic process
OS01G0371200	LOC_Os01g27360	704.538	-3.81573	0.402827	2.72e-22	3.08e-20	GO:0008152	P	metabolic process
OS01G0371200	LOC_Os01g27360	704.538	-3.81573	0.402827	2.72e-22	3.08e-20	GO:0005737	C	cytoplasm
OS01G0371400	LOC_Os01g27380	3.66296	-5.25768	2.69328	0.000417003	0.00418925	GO:0016020	C	membrane
OS01G0371400	LOC_Os01g27380	3.66296	-5.25768	2.69328	0.000417003	0.00418925	GO:0005576	C	extracellular region
OS01G0371400	LOC_Os01g27380	3.66296	-5.25768	2.69328	0.000417003	0.00418925	GO:0006950	P	response to stress
OS01G0371400	LOC_Os01g27380	3.66296	-5.25768	2.69328	0.000417003	0.00418925	GO:0009607	P	response to biotic stimulus
OS01G0371400	LOC_Os01g27380	3.66296	-5.25768	2.69328	0.000417003	0.00418925	GO:0005488	F	binding
OS01G0371400	LOC_Os01g27380	3.66296	-5.25768	2.69328	0.000417003	0.00418925	GO:0005829	C	cytosol
OS01G0371400	LOC_Os01g27380	3.66296	-5.25768	2.69328	0.000417003	0.00418925	GO:0009628	P	response to abiotic stimulus
OS01G0371400	LOC_Os01g27380	3.66296	-5.25768	2.69328	0.000417003	0.00418925	GO:0005886	C	plasma membrane
OS01G0371400	LOC_Os01g27380	3.66296	-5.25768	2.69328	0.000417003	0.00418925	GO:0009536	C	plastid
OS01G0371400	LOC_Os01g27380	3.66296	-5.25768	2.69328	0.000417003	0.00418925	GO:0016740	F	transferase activity
OS01G0371400	LOC_Os01g27380	3.66296	-5.25768	2.69328	0.000417003	0.00418925	GO:0005623	C	cell
OS01G0371400	LOC_Os01g27380	3.66296	-5.25768	2.69328	0.000417003	0.00418925	GO:0005575	C	cellular_component
OS01G0371400	LOC_Os01g27380	3.66296	-5.25768	2.69328	0.000417003	0.00418925	GO:0008152	P	metabolic process
OS01G0371400	LOC_Os01g27380	3.66296	-5.25768	2.69328	0.000417003	0.00418925	GO:0008150	P	biological_process
OS01G0371400	LOC_Os01g27380	3.66296	-5.25768	2.69328	0.000417003	0.00418925	GO:0005773	C	vacuole
OS01G0371400	LOC_Os01g27380	3.66296	-5.25768	2.69328	0.000417003	0.00418925	GO:0009056	P	catabolic process
OS01G0371400	LOC_Os01g27380	3.66296	-5.25768	2.69328	0.000417003	0.00418925	GO:0009987	P	cellular process
OS01G0371400	LOC_Os01g27380	3.66296	-5.25768	2.69328	0.000417003	0.00418925	GO:0019748	P	secondary metabolic process
OS01G0372350	None	39.4836	3.97024	0.944263	1.85e-06	3.3e-05	None	None	None
OS01G0372400	LOC_Os01g27480	11.3634	-7.57101	2.79479	1.94e-07	4.15e-06	GO:0016740	F	transferase activity
OS01G0372400	LOC_Os01g27480	11.3634	-7.57101	2.79479	1.94e-07	4.15e-06	GO:0009056	P	catabolic process
OS01G0372400	LOC_Os01g27480	11.3634	-7.57101	2.79479	1.94e-07	4.15e-06	GO:0009987	P	cellular process
OS01G0372400	LOC_Os01g27480	11.3634	-7.57101	2.79479	1.94e-07	4.15e-06	GO:0019748	P	secondary metabolic process
OS01G0372400	LOC_Os01g27480	11.3634	-7.57101	2.79479	1.94e-07	4.15e-06	GO:0008152	P	metabolic process
OS01G0372400	LOC_Os01g27480	11.3634	-7.57101	2.79479	1.94e-07	4.15e-06	GO:0005737	C	cytoplasm
OS01G0373800	None	48.8545	-1.57271	0.450874	0.000142812	0.00166427	None	None	None
OS01G0374900	LOC_Os01g27720	825.173	0.596352	0.201278	0.00248931	0.0181529	GO:0009058	P	biosynthetic process
OS01G0374900	LOC_Os01g27720	825.173	0.596352	0.201278	0.00248931	0.0181529	GO:0006464	P	protein modification process
OS01G0374900	LOC_Os01g27720	825.173	0.596352	0.201278	0.00248931	0.0181529	GO:0005488	F	binding
OS01G0374900	LOC_Os01g27720	825.173	0.596352	0.201278	0.00248931	0.0181529	GO:0005886	C	plasma membrane
OS01G0375000	LOC_Os01g27730	3829.14	-0.553899	0.17476	0.0012564	0.0104464	GO:0005575	C	cellular_component
OS01G0375000	LOC_Os01g27730	3829.14	-0.553899	0.17476	0.0012564	0.0104464	GO:0005730	C	nucleolus
OS01G0375000	LOC_Os01g27730	3829.14	-0.553899	0.17476	0.0012564	0.0104464	GO:0000166	F	nucleotide binding
OS01G0375000	LOC_Os01g27730	3829.14	-0.553899	0.17476	0.0012564	0.0104464	GO:0008150	P	biological_process
OS01G0375500	LOC_Os01g27770	58.2377	-1.95303	0.400645	2.01e-07	4.29e-06	GO:0003824	F	catalytic activity
OS01G0375500	LOC_Os01g27770	58.2377	-1.95303	0.400645	2.01e-07	4.29e-06	GO:0008152	P	metabolic process
OS01G0375500	LOC_Os01g27770	58.2377	-1.95303	0.400645	2.01e-07	4.29e-06	GO:0000003	P	reproduction
OS01G0375500	LOC_Os01g27770	58.2377	-1.95303	0.400645	2.01e-07	4.29e-06	GO:0009791	P	post-embryonic development
OS01G0375500	LOC_Os01g27770	58.2377	-1.95303	0.400645	2.01e-07	4.29e-06	GO:0009790	P	embryo development
OS01G0375500	LOC_Os01g27770	58.2377	-1.95303	0.400645	2.01e-07	4.29e-06	GO:0009987	P	cellular process
OS01G0375500	LOC_Os01g27770	58.2377	-1.95303	0.400645	2.01e-07	4.29e-06	GO:0009536	C	plastid
OS01G0376600	LOC_Os01g27860	5.30059	-5.96191	2.78249	0.0001259	0.00149152	None	None	None
OS01G0377000	LOC_Os01g27890	92.5966	1.5864	0.285333	7.84e-09	2.02e-07	GO:0005623	C	cell
OS01G0377000	LOC_Os01g27890	92.5966	1.5864	0.285333	7.84e-09	2.02e-07	GO:0003674	F	molecular_function
OS01G0377000	LOC_Os01g27890	92.5966	1.5864	0.285333	7.84e-09	2.02e-07	GO:0005488	F	binding
OS01G0377000	LOC_Os01g27890	92.5966	1.5864	0.285333	7.84e-09	2.02e-07	GO:0003824	F	catalytic activity
OS01G0377000	LOC_Os01g27890	92.5966	1.5864	0.285333	7.84e-09	2.02e-07	GO:0008152	P	metabolic process
OS01G0377000	LOC_Os01g27890	92.5966	1.5864	0.285333	7.84e-09	2.02e-07	GO:0019825	F	oxygen binding
OS01G0379400	LOC_Os01g28150	165.125	-0.760196	0.267855	0.00312068	0.021652	GO:0003674	F	molecular_function
OS01G0379400	LOC_Os01g28150	165.125	-0.760196	0.267855	0.00312068	0.021652	GO:0008150	P	biological_process
OS01G0379400	LOC_Os01g28150	165.125	-0.760196	0.267855	0.00312068	0.021652	GO:0003674	F	molecular_function
OS01G0379400	LOC_Os01g28150	165.125	-0.760196	0.267855	0.00312068	0.021652	GO:0008150	P	biological_process
OS01G0382700	LOC_Os01g28540	42.2798	1.27244	0.406837	0.000678851	0.00628218	GO:0009536	C	plastid
OS01G0382700	LOC_Os01g28540	42.2798	1.27244	0.406837	0.000678851	0.00628218	GO:0009536	C	plastid
OS01G0383700	LOC_Os01g28680	1790.18	-2.25611	0.603879	2.62e-05	0.000369649	GO:0005622	C	intracellular
OS01G0383700	LOC_Os01g28680	1790.18	-2.25611	0.603879	2.62e-05	0.000369649	GO:0000166	F	nucleotide binding
OS01G0383700	LOC_Os01g28680	1790.18	-2.25611	0.603879	2.62e-05	0.000369649	GO:0008150	P	biological_process
OS01G0383700	LOC_Os01g28680	1790.18	-2.25611	0.603879	2.62e-05	0.000369649	GO:0005622	C	intracellular
OS01G0383700	LOC_Os01g28680	1790.18	-2.25611	0.603879	2.62e-05	0.000369649	GO:0000166	F	nucleotide binding
OS01G0383700	LOC_Os01g28680	1790.18	-2.25611	0.603879	2.62e-05	0.000369649	GO:0008150	P	biological_process
OS01G0383700	LOC_Os01g28680	1790.18	-2.25611	0.603879	2.62e-05	0.000369649	GO:0005622	C	intracellular
OS01G0383700	LOC_Os01g28680	1790.18	-2.25611	0.603879	2.62e-05	0.000369649	GO:0000166	F	nucleotide binding
OS01G0383700	LOC_Os01g28680	1790.18	-2.25611	0.603879	2.62e-05	0.000369649	GO:0008150	P	biological_process
OS01G0383700	LOC_Os01g28680	1790.18	-2.25611	0.603879	2.62e-05	0.000369649	GO:0005622	C	intracellular
OS01G0383700	LOC_Os01g28680	1790.18	-2.25611	0.603879	2.62e-05	0.000369649	GO:0000166	F	nucleotide binding
OS01G0383700	LOC_Os01g28680	1790.18	-2.25611	0.603879	2.62e-05	0.000369649	GO:0008150	P	biological_process
OS01G0383700	LOC_Os01g28680	1790.18	-2.25611	0.603879	2.62e-05	0.000369649	GO:0005622	C	intracellular
OS01G0383700	LOC_Os01g28680	1790.18	-2.25611	0.603879	2.62e-05	0.000369649	GO:0000166	F	nucleotide binding
OS01G0383700	LOC_Os01g28680	1790.18	-2.25611	0.603879	2.62e-05	0.000369649	GO:0008150	P	biological_process
OS01G0383700	LOC_Os01g28680	1790.18	-2.25611	0.603879	2.62e-05	0.000369649	GO:0005622	C	intracellular
OS01G0383700	LOC_Os01g28680	1790.18	-2.25611	0.603879	2.62e-05	0.000369649	GO:0000166	F	nucleotide binding
OS01G0383700	LOC_Os01g28680	1790.18	-2.25611	0.603879	2.62e-05	0.000369649	GO:0008150	P	biological_process
OS01G0383700	LOC_Os01g28680	1790.18	-2.25611	0.603879	2.62e-05	0.000369649	GO:0005622	C	intracellular
OS01G0383700	LOC_Os01g28680	1790.18	-2.25611	0.603879	2.62e-05	0.000369649	GO:0000166	F	nucleotide binding
OS01G0383700	LOC_Os01g28680	1790.18	-2.25611	0.603879	2.62e-05	0.000369649	GO:0008150	P	biological_process
OS01G0383700	LOC_Os01g28680	1790.18	-2.25611	0.603879	2.62e-05	0.000369649	GO:0005622	C	intracellular
OS01G0383700	LOC_Os01g28680	1790.18	-2.25611	0.603879	2.62e-05	0.000369649	GO:0000166	F	nucleotide binding
OS01G0383700	LOC_Os01g28680	1790.18	-2.25611	0.603879	2.62e-05	0.000369649	GO:0008150	P	biological_process
OS01G0383700	LOC_Os01g286800	1790.18	-2.25611	0.603879	2.62e-05	0.000369649	GO:0005622	C	intracellular
OS01G0383700	LOC_Os01g286800	1790.18	-2.25611	0.603879	2.62e-05	0.000369649	GO:0000166	F	nucleotide binding
OS01G0383700	LOC_Os01g286800	1790.18	-2.25611	0.603879	2.62e-05	0.000369649	GO:0008150	P	biological_process
OS01G0383700	LOC_Os01g286802	1790.18	-2.25611	0.603879	2.62e-05	0.000369649	GO:0005622	C	intracellular
OS01G0383700	LOC_Os01g286802	1790.18	-2.25611	0.603879	2.62e-05	0.000369649	GO:0000166	F	nucleotide binding
OS01G0383700	LOC_Os01g286802	1790.18	-2.25611	0.603879	2.62e-05	0.000369649	GO:0008150	P	biological_process
OS01G0383700	LOC_Os01g286803	1790.18	-2.25611	0.603879	2.62e-05	0.000369649	GO:0005622	C	intracellular
OS01G0383700	LOC_Os01g286803	1790.18	-2.25611	0.603879	2.62e-05	0.000369649	GO:0000166	F	nucleotide binding
OS01G0383700	LOC_Os01g286803	1790.18	-2.25611	0.603879	2.62e-05	0.000369649	GO:0008150	P	biological_process
OS01G0386500	LOC_Os01g28970	6.78688	-6.65405	2.67529	2.66e-06	4.63e-05	None	None	None
OS01G0386600	LOC_Os01g28980	17.1537	-8.23739	2.92788	9.47e-08	2.12e-06	GO:0016020	C	membrane
OS01G0386600	LOC_Os01g28980	17.1537	-8.23739	2.92788	9.47e-08	2.12e-06	GO:0006810	P	transport
OS01G0386600	LOC_Os01g28980	17.1537	-8.23739	2.92788	9.47e-08	2.12e-06	GO:0005886	C	plasma membrane
OS01G0386600	LOC_Os01g28980	17.1537	-8.23739	2.92788	9.47e-08	2.12e-06	GO:0005215	F	transporter activity
OS01G0387566	None	112.057	-1.60596	0.422988	3.84e-05	0.000520111	None	None	None
OS01G0390300	LOC_Os01g29390	218.118	-2.52437	0.361256	4.84e-13	2.12e-11	GO:0003674	F	molecular_function
OS01G0390300	LOC_Os01g29390	218.118	-2.52437	0.361256	4.84e-13	2.12e-11	GO:0005575	C	cellular_component
OS01G0390300	LOC_Os01g29390	218.118	-2.52437	0.361256	4.84e-13	2.12e-11	GO:0008150	P	biological_process
OS01G0390300	LOC_Os01g29390	218.118	-2.52437	0.361256	4.84e-13	2.12e-11	GO:0003674	F	molecular_function
OS01G0390300	LOC_Os01g29390	218.118	-2.52437	0.361256	4.84e-13	2.12e-11	GO:0005575	C	cellular_component
OS01G0390300	LOC_Os01g29390	218.118	-2.52437	0.361256	4.84e-13	2.12e-11	GO:0008150	P	biological_process
OS01G0391800	None	5.77999	6.8915	2.71376	3.51e-06	5.95e-05	None	None	None
OS01G0501700	LOC_Os01g31680	300.152	1.0209	0.340759	0.00145515	0.0117565	GO:0006810	P	transport
OS01G0501700	LOC_Os01g31680	300.152	1.0209	0.340759	0.00145515	0.0117565	GO:0009987	P	cellular process
OS01G0501700	LOC_Os01g31680	300.152	1.0209	0.340759	0.00145515	0.0117565	GO:0016020	C	membrane
OS01G0501700	LOC_Os01g31680	300.152	1.0209	0.340759	0.00145515	0.0117565	GO:0009536	C	plastid
OS01G0501700	LOC_Os01g31680	300.152	1.0209	0.340759	0.00145515	0.0117565	GO:0009579	C	thylakoid
OS01G0501700	LOC_Os01g31680	300.152	1.0209	0.340759	0.00145515	0.0117565	GO:0000003	P	reproduction
OS01G0501700	LOC_Os01g31680	300.152	1.0209	0.340759	0.00145515	0.0117565	GO:0005575	C	cellular_component
OS01G0501700	LOC_Os01g31680	300.152	1.0209	0.340759	0.00145515	0.0117565	GO:0005215	F	transporter activity
OS01G0501700	LOC_Os01g31680	300.152	1.0209	0.340759	0.00145515	0.0117565	GO:0016043	P	cellular component organization
OS01G0501700	LOC_Os01g31680	300.152	1.0209	0.340759	0.00145515	0.0117565	GO:0006810	P	transport
OS01G0501700	LOC_Os01g31680	300.152	1.0209	0.340759	0.00145515	0.0117565	GO:0009987	P	cellular process
OS01G0501700	LOC_Os01g31680	300.152	1.0209	0.340759	0.00145515	0.0117565	GO:0016020	C	membrane
OS01G0501700	LOC_Os01g31680	300.152	1.0209	0.340759	0.00145515	0.0117565	GO:0009536	C	plastid
OS01G0501700	LOC_Os01g31680	300.152	1.0209	0.340759	0.00145515	0.0117565	GO:0009579	C	thylakoid
OS01G0501700	LOC_Os01g31680	300.152	1.0209	0.340759	0.00145515	0.0117565	GO:0000003	P	reproduction
OS01G0501700	LOC_Os01g31680	300.152	1.0209	0.340759	0.00145515	0.0117565	GO:0005575	C	cellular_component
OS01G0501700	LOC_Os01g31680	300.152	1.0209	0.340759	0.00145515	0.0117565	GO:0005215	F	transporter activity
OS01G0501700	LOC_Os01g31680	300.152	1.0209	0.340759	0.00145515	0.0117565	GO:0016043	P	cellular component organization
OS01G0501800	LOC_Os01g31690	1021.77	5.48935	0.788166	2e-13	9.06e-12	GO:0016020	C	membrane
OS01G0501800	LOC_Os01g31690	1021.77	5.48935	0.788166	2e-13	9.06e-12	GO:0009536	C	plastid
OS01G0501800	LOC_Os01g31690	1021.77	5.48935	0.788166	2e-13	9.06e-12	GO:0009579	C	thylakoid
OS01G0501800	LOC_Os01g31690	1021.77	5.48935	0.788166	2e-13	9.06e-12	GO:0006091	P	generation of precursor metabolites and energy
OS01G0501800	LOC_Os01g31690	1021.77	5.48935	0.788166	2e-13	9.06e-12	GO:0009628	P	response to abiotic stimulus
OS01G0501800	LOC_Os01g31690	1021.77	5.48935	0.788166	2e-13	9.06e-12	GO:0015979	P	photosynthesis
OS01G0501800	LOC_Os01g31690	1021.77	5.48935	0.788166	2e-13	9.06e-12	GO:0008152	P	metabolic process
OS01G0501800	LOC_Os01g31690	1021.77	5.48935	0.788166	2e-13	9.06e-12	GO:0005515	F	protein binding
OS01G0501800	LOC_Os01g31690	1021.77	5.48935	0.788166	2e-13	9.06e-12	GO:0016043	P	cellular component organization
OS01G0501800	LOC_Os01g31690	1021.77	5.48935	0.788166	2e-13	9.06e-12	GO:0003824	F	catalytic activity
OS01G0501800	LOC_Os01g31690	1021.77	5.48935	0.788166	2e-13	9.06e-12	GO:0006464	P	protein modification process
OS01G0501800	LOC_Os01g31690	1021.77	5.48935	0.788166	2e-13	9.06e-12	GO:0003723	F	RNA binding
OS01G0501800	LOC_Os01g31690	1021.77	5.48935	0.788166	2e-13	9.06e-12	GO:0016020	C	membrane
OS01G0501800	LOC_Os01g31690	1021.77	5.48935	0.788166	2e-13	9.06e-12	GO:0009536	C	plastid
OS01G0501800	LOC_Os01g31690	1021.77	5.48935	0.788166	2e-13	9.06e-12	GO:0009579	C	thylakoid
OS01G0501800	LOC_Os01g31690	1021.77	5.48935	0.788166	2e-13	9.06e-12	GO:0006091	P	generation of precursor metabolites and energy
OS01G0501800	LOC_Os01g31690	1021.77	5.48935	0.788166	2e-13	9.06e-12	GO:0009628	P	response to abiotic stimulus
OS01G0501800	LOC_Os01g31690	1021.77	5.48935	0.788166	2e-13	9.06e-12	GO:0015979	P	photosynthesis
OS01G0501800	LOC_Os01g31690	1021.77	5.48935	0.788166	2e-13	9.06e-12	GO:0008152	P	metabolic process
OS01G0501800	LOC_Os01g31690	1021.77	5.48935	0.788166	2e-13	9.06e-12	GO:0005515	F	protein binding
OS01G0501800	LOC_Os01g31690	1021.77	5.48935	0.788166	2e-13	9.06e-12	GO:0016043	P	cellular component organization
OS01G0501800	LOC_Os01g31690	1021.77	5.48935	0.788166	2e-13	9.06e-12	GO:0003824	F	catalytic activity
OS01G0501800	LOC_Os01g31690	1021.77	5.48935	0.788166	2e-13	9.06e-12	GO:0006464	P	protein modification process
OS01G0501800	LOC_Os01g31690	1021.77	5.48935	0.788166	2e-13	9.06e-12	GO:0003723	F	RNA binding
OS01G0503400	LOC_Os01g31870	246.392	1.04158	0.288257	0.000159645	0.00182995	GO:0006810	P	transport
OS01G0503400	LOC_Os01g31870	246.392	1.04158	0.288257	0.000159645	0.00182995	GO:0009987	P	cellular process
OS01G0503400	LOC_Os01g31870	246.392	1.04158	0.288257	0.000159645	0.00182995	GO:0005215	F	transporter activity
OS01G0503400	LOC_Os01g31870	246.392	1.04158	0.288257	0.000159645	0.00182995	GO:0005886	C	plasma membrane
OS01G0503400	LOC_Os01g31870	246.392	1.04158	0.288257	0.000159645	0.00182995	GO:0008150	P	biological_process
OS01G0503400	LOC_Os01g31870	246.392	1.04158	0.288257	0.000159645	0.00182995	GO:0019725	P	cellular homeostasis
OS01G0503400	LOC_Os01g31870	246.392	1.04158	0.288257	0.000159645	0.00182995	GO:0006810	P	transport
OS01G0503400	LOC_Os01g31870	246.392	1.04158	0.288257	0.000159645	0.00182995	GO:0009987	P	cellular process
OS01G0503400	LOC_Os01g31870	246.392	1.04158	0.288257	0.000159645	0.00182995	GO:0005215	F	transporter activity
OS01G0503400	LOC_Os01g31870	246.392	1.04158	0.288257	0.000159645	0.00182995	GO:0005886	C	plasma membrane
OS01G0503400	LOC_Os01g31870	246.392	1.04158	0.288257	0.000159645	0.00182995	GO:0008150	P	biological_process
OS01G0503400	LOC_Os01g31870	246.392	1.04158	0.288257	0.000159645	0.00182995	GO:0019725	P	cellular homeostasis
OS01G0503400	LOC_Os01g31870	246.392	1.04158	0.288257	0.000159645	0.00182995	GO:0006810	P	transport
OS01G0503400	LOC_Os01g31870	246.392	1.04158	0.288257	0.000159645	0.00182995	GO:0009987	P	cellular process
OS01G0503400	LOC_Os01g31870	246.392	1.04158	0.288257	0.000159645	0.00182995	GO:0005215	F	transporter activity
OS01G0503400	LOC_Os01g31870	246.392	1.04158	0.288257	0.000159645	0.00182995	GO:0005886	C	plasma membrane
OS01G0503400	LOC_Os01g31870	246.392	1.04158	0.288257	0.000159645	0.00182995	GO:0008150	P	biological_process
OS01G0503400	LOC_Os01g31870	246.392	1.04158	0.288257	0.000159645	0.00182995	GO:0019725	P	cellular homeostasis
OS01G0503400	LOC_Os01g31870	246.392	1.04158	0.288257	0.000159645	0.00182995	GO:0006810	P	transport
OS01G0503400	LOC_Os01g31870	246.392	1.04158	0.288257	0.000159645	0.00182995	GO:0009987	P	cellular process
OS01G0503400	LOC_Os01g31870	246.392	1.04158	0.288257	0.000159645	0.00182995	GO:0005215	F	transporter activity
OS01G0503400	LOC_Os01g31870	246.392	1.04158	0.288257	0.000159645	0.00182995	GO:0005886	C	plasma membrane
OS01G0503400	LOC_Os01g31870	246.392	1.04158	0.288257	0.000159645	0.00182995	GO:0008150	P	biological_process
OS01G0503400	LOC_Os01g31870	246.392	1.04158	0.288257	0.000159645	0.00182995	GO:0019725	P	cellular homeostasis
OS01G0503400	LOC_Os01g31870	246.392	1.04158	0.288257	0.000159645	0.00182995	GO:0006810	P	transport
OS01G0503400	LOC_Os01g31870	246.392	1.04158	0.288257	0.000159645	0.00182995	GO:0009987	P	cellular process
OS01G0503400	LOC_Os01g31870	246.392	1.04158	0.288257	0.000159645	0.00182995	GO:0005215	F	transporter activity
OS01G0503400	LOC_Os01g31870	246.392	1.04158	0.288257	0.000159645	0.00182995	GO:0005886	C	plasma membrane
OS01G0503400	LOC_Os01g31870	246.392	1.04158	0.288257	0.000159645	0.00182995	GO:0008150	P	biological_process
OS01G0503400	LOC_Os01g31870	246.392	1.04158	0.288257	0.000159645	0.00182995	GO:0019725	P	cellular homeostasis
OS01G0503400	LOC_Os01g31870	246.392	1.04158	0.288257	0.000159645	0.00182995	GO:0006810	P	transport
OS01G0503400	LOC_Os01g31870	246.392	1.04158	0.288257	0.000159645	0.00182995	GO:0009987	P	cellular process
OS01G0503400	LOC_Os01g31870	246.392	1.04158	0.288257	0.000159645	0.00182995	GO:0005215	F	transporter activity
OS01G0503400	LOC_Os01g31870	246.392	1.04158	0.288257	0.000159645	0.00182995	GO:0005886	C	plasma membrane
OS01G0503400	LOC_Os01g31870	246.392	1.04158	0.288257	0.000159645	0.00182995	GO:0008150	P	biological_process
OS01G0503400	LOC_Os01g31870	246.392	1.04158	0.288257	0.000159645	0.00182995	GO:0019725	P	cellular homeostasis
OS01G0503400	LOC_Os01g31870	246.392	1.04158	0.288257	0.000159645	0.00182995	GO:0006810	P	transport
OS01G0503400	LOC_Os01g31870	246.392	1.04158	0.288257	0.000159645	0.00182995	GO:0009987	P	cellular process
OS01G0503400	LOC_Os01g31870	246.392	1.04158	0.288257	0.000159645	0.00182995	GO:0005215	F	transporter activity
OS01G0503400	LOC_Os01g31870	246.392	1.04158	0.288257	0.000159645	0.00182995	GO:0005886	C	plasma membrane
OS01G0503400	LOC_Os01g31870	246.392	1.04158	0.288257	0.000159645	0.00182995	GO:0008150	P	biological_process
OS01G0503400	LOC_Os01g31870	246.392	1.04158	0.288257	0.000159645	0.00182995	GO:0019725	P	cellular homeostasis
OS01G0503400	LOC_Os01g31870	246.392	1.04158	0.288257	0.000159645	0.00182995	GO:0006810	P	transport
OS01G0503400	LOC_Os01g31870	246.392	1.04158	0.288257	0.000159645	0.00182995	GO:0009987	P	cellular process
OS01G0503400	LOC_Os01g31870	246.392	1.04158	0.288257	0.000159645	0.00182995	GO:0005215	F	transporter activity
OS01G0503400	LOC_Os01g31870	246.392	1.04158	0.288257	0.000159645	0.00182995	GO:0005886	C	plasma membrane
OS01G0503400	LOC_Os01g31870	246.392	1.04158	0.288257	0.000159645	0.00182995	GO:0008150	P	biological_process
OS01G0503400	LOC_Os01g31870	246.392	1.04158	0.288257	0.000159645	0.00182995	GO:0019725	P	cellular homeostasis
OS01G0504500	LOC_Os01g31980	1420.11	-1.8988	0.29602	3.06e-11	1.09e-09	GO:0006810	P	transport
[truncated: 28,048 more rows]

## Sheet: common DEGs_pairwise comparison
rap	MSU	GO	GO category	function	average log2FoldChange
ENSRNA049465109	None	None	None	None	6.26047
ENSRNA049465125	None	None	None	None	12.6518
ENSRNA049465687	None	None	None	None	5.04905
ENSRNA049466338	None	None	None	None	7.04124
ENSRNA049471707	None	None	None	None	5.11712
ENSRNA049471772	None	None	None	None	5.38713
ENSRNA049471778	None	None	None	None	4.96456
ENSRNA049472543	None	None	None	None	-3.44984
EPlOSAG00000001076	None	None	None	None	3.6103
EPlOSAG00000001110	None	None	None	None	4.06463
EPlOSAG00000006911	None	None	None	None	5.66827
EPlOSAG00000007324	None	None	None	None	3.74323
EPlOSAG00000008496	None	None	None	None	5.8691
EPlOSAG00000008503	None	None	None	None	3.76933
EPlOSAG00000008504	None	None	None	None	4.55591
EPlOSAG00000008548	None	None	None	None	4.48551
EPlOSAG00000008549	None	None	None	None	4.57667
EPlOSAG00000008550	None	None	None	None	4.50711
EPlOSAG00000008553	None	None	None	None	4.77729
EPlOSAG00000008560	None	None	None	None	14.5415
EPlOSAG00000008562	None	None	None	None	0.308794
EPlOSAG00000008567	None	None	None	None	3.87535
EPlOSAG00000008568	None	None	None	None	7.33226
EPlOSAG00000008569	None	None	None	None	7.61541
EPlOSAG00000009004	None	None	None	None	-3.42278
EPlOSAG00000009034	None	None	None	None	-3.44984
EPlOSAG00000009133	None	None	None	None	2.27247
EPlOSAG00000010431	None	None	None	None	4.88098
EPlOSAG00000010451	None	None	None	None	4.05746
EPlOSAG00000011469	None	None	None	None	-6.86396
EPlOSAG00000012767	None	None	None	None	4.90757
EPlOSAG00000013406	None	None	None	None	-6.75383
EPlOSAG00000016824	None	None	None	None	6.74993
EPlOSAG00000016878	None	None	None	None	-4.44387
EPlOSAG00000019843	None	None	None	None	8.64558
EPlOSAG00000019866	None	None	None	None	3.1854
EPlOSAG00000020032	None	None	None	None	14.495
EPlOSAG00000023750	None	None	None	None	6.24401
EPlOSAG00000023751	None	None	None	None	5.93095
EPlOSAG00000023752	None	None	None	None	6.46356
EPlOSAG00000023754	None	None	None	None	6.52527
EPlOSAG00000028184	None	None	None	None	4.47414
EPlOSAG00000045176	None	None	None	None	3.04506
EPlOSAG00000045221	None	None	None	None	4.38536
EPlOSAG00000045287	None	None	None	None	3.23858
EPlOSAG00000045454	None	None	None	None	4.41083
EPlOSAG00000045543	None	None	None	None	3.42311
EPlOSAG00000045565	None	None	None	None	2.92302
EPlOSAG00000045576	None	None	None	None	4.21806
EPlOSAG00000045598	None	None	None	None	2.69868
EPlOSAG00000045643	None	None	None	None	5.9925
EPlOSAG00000045665	None	None	None	None	3.7786
EPlOSAG00000045787	None	None	None	None	4.07803
EPlOSAG00000045842	None	None	None	None	6.48698
EPlOSAG00000046110	None	None	None	None	5.95317
EPlOSAG00000046165	None	None	None	None	3.57466
EPlOSAG00000046254	None	None	None	None	3.053
EPlOSAG00000046321	None	None	None	None	4.50048
EPlOSAG00000046343	None	None	None	None	4.54982
EPlOSAG00000046354	None	None	None	None	4.85218
EPlOSAG00000046365	None	None	None	None	4.36037
EPlOSAG00000046421	None	None	None	None	6.05373
EPlOSAG00000046454	None	None	None	None	4.12136
EPlOSAG00000046487	None	None	None	None	2.99732
EPlOSAG00000046698	None	None	None	None	5.23152
EPlOSAG00000046798	None	None	None	None	5.14272
EPlOSAG00000046987	None	None	None	None	5.54994
OS01G0105400	LOC_Os01g01570	None	None	None	-1.97677
OS01G0105700	LOC_Os01g01600	GO:0005634	C	nucleus	-1.7244
OS01G0105700	LOC_Os01g01600	GO:0009058	P	biosynthetic process	-1.7244
OS01G0105700	LOC_Os01g01600	GO:0006139	P	nucleobase, nucleoside, nucleotide and nucleic acid metabolic process	-1.7244
OS01G0105700	LOC_Os01g01600	GO:0003700	F	sequence-specific DNA binding transcription factor activity	-1.7244
OS01G0113000	LOC_Os01g02270	None	None	None	-3.86816
OS01G0117000	LOC_Os01g02760	GO:0005623	C	cell	3.45177
OS01G0117000	LOC_Os01g02760	GO:0008152	P	metabolic process	3.45177
OS01G0117000	LOC_Os01g02760	GO:0009987	P	cellular process	3.45177
OS01G0117000	LOC_Os01g02760	GO:0016301	F	kinase activity	3.45177
OS01G0117000	LOC_Os01g02760	GO:0000166	F	nucleotide binding	3.45177
OS01G0117000	LOC_Os01g02760	GO:0006464	P	protein modification process	3.45177
OS01G0149200	LOC_Os01g05585	GO:0019725	P	cellular homeostasis	-4.84169
OS01G0149200	LOC_Os01g05585	GO:0005488	F	binding	-4.84169
OS01G0149600	LOC_Os01g05630	GO:0003677	F	DNA binding	-1.57064
OS01G0149600	LOC_Os01g05630	GO:0005634	C	nucleus	-1.57064
OS01G0149600	LOC_Os01g05630	GO:0005515	F	protein binding	-1.57064
OS01G0149600	LOC_Os01g05630	GO:0005730	C	nucleolus	-1.57064
OS01G0149600	LOC_Os01g05630	GO:0016043	P	cellular component organization	-1.57064
OS01G0149600	LOC_Os01g05630	GO:0006259	P	DNA metabolic process	-1.57064
OS01G0188900	LOC_Os01g09370	GO:0005575	C	cellular_component	-5.4816
OS01G0188900	LOC_Os01g09370	GO:0008150	P	biological_process	-5.4816
OS01G0188900	LOC_Os01g09370	GO:0005488	F	binding	-5.4816
OS01G0208700	LOC_Os01g11054	GO:0006091	P	generation of precursor metabolites and energy	-3.01132
OS01G0208700	LOC_Os01g11054	GO:0009056	P	catabolic process	-3.01132
OS01G0208700	LOC_Os01g11054	GO:0008152	P	metabolic process	-3.01132
OS01G0208700	LOC_Os01g11054	GO:0003824	F	catalytic activity	-3.01132
OS01G0208700	LOC_Os01g11054	GO:0005829	C	cytosol	-3.01132
OS01G0208700	LOC_Os01g11054	GO:0006091	P	generation of precursor metabolites and energy	-3.01132
OS01G0208700	LOC_Os01g11054	GO:0009056	P	catabolic process	-3.01132
OS01G0208700	LOC_Os01g11054	GO:0005576	C	extracellular region	-3.01132
OS01G0208700	LOC_Os01g11054	GO:0009991	P	response to extracellular stimulus	-3.01132
OS01G0208700	LOC_Os01g11054	GO:0007154	P	cell communication	-3.01132
OS01G0208700	LOC_Os01g11054	GO:0006950	P	response to stress	-3.01132
OS01G0208700	LOC_Os01g11054	GO:0005515	F	protein binding	-3.01132
OS01G0208700	LOC_Os01g11054	GO:0003824	F	catalytic activity	-3.01132
OS01G0208700	LOC_Os01g11054	GO:0005829	C	cytosol	-3.01132
OS01G0208700	LOC_Os01g11054	GO:0016043	P	cellular component organization	-3.01132
OS01G0208700	LOC_Os01g11054	GO:0006091	P	generation of precursor metabolites and energy	-3.01132
OS01G0208700	LOC_Os01g11054	GO:0009056	P	catabolic process	-3.01132
OS01G0208700	LOC_Os01g11054	GO:0005576	C	extracellular region	-3.01132
OS01G0208700	LOC_Os01g11054	GO:0009991	P	response to extracellular stimulus	-3.01132
OS01G0208700	LOC_Os01g11054	GO:0007154	P	cell communication	-3.01132
OS01G0208700	LOC_Os01g11054	GO:0006950	P	response to stress	-3.01132
OS01G0208700	LOC_Os01g11054	GO:0005515	F	protein binding	-3.01132
OS01G0208700	LOC_Os01g11054	GO:0003824	F	catalytic activity	-3.01132
OS01G0208700	LOC_Os01g11054	GO:0005829	C	cytosol	-3.01132
OS01G0208700	LOC_Os01g11054	GO:0016043	P	cellular component organization	-3.01132
OS01G0208700	LOC_Os01g11054	GO:0006091	P	generation of precursor metabolites and energy	-3.01132
OS01G0208700	LOC_Os01g11054	GO:0009056	P	catabolic process	-3.01132
OS01G0208700	LOC_Os01g11054	GO:0005576	C	extracellular region	-3.01132
OS01G0208700	LOC_Os01g11054	GO:0009991	P	response to extracellular stimulus	-3.01132
OS01G0208700	LOC_Os01g11054	GO:0007154	P	cell communication	-3.01132
OS01G0208700	LOC_Os01g11054	GO:0006950	P	response to stress	-3.01132
OS01G0208700	LOC_Os01g11054	GO:0005515	F	protein binding	-3.01132
OS01G0208700	LOC_Os01g11054	GO:0003824	F	catalytic activity	-3.01132
OS01G0208700	LOC_Os01g11054	GO:0005829	C	cytosol	-3.01132
OS01G0208700	LOC_Os01g11054	GO:0016043	P	cellular component organization	-3.01132
OS01G0210600	LOC_Os01g11240	GO:0005575	C	cellular_component	-0.71311
OS01G0210600	LOC_Os01g11240	GO:0008150	P	biological_process	-0.71311
OS01G0214600	LOC_Os01g11620	GO:0005623	C	cell	1.48359
OS01G0214600	LOC_Os01g11620	GO:0008152	P	metabolic process	1.48359
OS01G0214600	LOC_Os01g11620	GO:0016787	F	hydrolase activity	1.48359
OS01G0214600	LOC_Os01g11620	GO:0006629	P	lipid metabolic process	1.48359
OS01G0214600	LOC_Os01g11620	GO:0008152	P	metabolic process	1.48359
OS01G0214600	LOC_Os01g11620	GO:0016787	F	hydrolase activity	1.48359
OS01G0214600	LOC_Os01g11620	GO:0005618	C	cell wall	1.48359
OS01G0214600	LOC_Os01g11620	GO:0006629	P	lipid metabolic process	1.48359
OS01G0233000	LOC_Os01g13210	GO:0006950	P	response to stress	1.24751
OS01G0233000	LOC_Os01g13210	GO:0009628	P	response to abiotic stimulus	1.24751
OS01G0233000	LOC_Os01g13210	GO:0009607	P	response to biotic stimulus	1.24751
OS01G0233000	LOC_Os01g13210	GO:0005773	C	vacuole	1.24751
OS01G0233000	LOC_Os01g13210	GO:0008289	F	lipid binding	1.24751
OS01G0233000	LOC_Os01g13210	GO:0009058	P	biosynthetic process	1.24751
OS01G0233000	LOC_Os01g13210	GO:0006464	P	protein modification process	1.24751
OS01G0233000	LOC_Os01g13210	GO:0005488	F	binding	1.24751
OS01G0233000	LOC_Os01g13210	GO:0005515	F	protein binding	1.24751
OS01G0233000	LOC_Os01g13210	GO:0005886	C	plasma membrane	1.24751
OS01G0233000	LOC_Os01g13210	GO:0009536	C	plastid	1.24751
OS01G0233000	LOC_Os01g13210	GO:0006950	P	response to stress	1.24751
OS01G0233000	LOC_Os01g13210	GO:0009628	P	response to abiotic stimulus	1.24751
OS01G0233000	LOC_Os01g13210	GO:0009607	P	response to biotic stimulus	1.24751
OS01G0233000	LOC_Os01g13210	GO:0005773	C	vacuole	1.24751
OS01G0233000	LOC_Os01g13210	GO:0008289	F	lipid binding	1.24751
OS01G0233000	LOC_Os01g13210	GO:0009058	P	biosynthetic process	1.24751
OS01G0233000	LOC_Os01g13210	GO:0006464	P	protein modification process	1.24751
OS01G0233000	LOC_Os01g13210	GO:0005488	F	binding	1.24751
OS01G0233000	LOC_Os01g13210	GO:0005515	F	protein binding	1.24751
OS01G0233000	LOC_Os01g13210	GO:0005886	C	plasma membrane	1.24751
OS01G0233000	LOC_Os01g13210	GO:0009536	C	plastid	1.24751
OS01G0239200	LOC_Os01g13770	GO:0016020	C	membrane	1.36896
OS01G0239200	LOC_Os01g13770	GO:0006810	P	transport	1.36896
OS01G0239200	LOC_Os01g13770	GO:0009987	P	cellular process	1.36896
OS01G0239200	LOC_Os01g13770	GO:0009628	P	response to abiotic stimulus	1.36896
OS01G0239200	LOC_Os01g13770	GO:0005215	F	transporter activity	1.36896
OS01G0239200	LOC_Os01g13770	GO:0009536	C	plastid	1.36896
OS01G0239200	LOC_Os01g13770	GO:0016020	C	membrane	1.36896
OS01G0239200	LOC_Os01g13770	GO:0006810	P	transport	1.36896
OS01G0239200	LOC_Os01g13770	GO:0009987	P	cellular process	1.36896
OS01G0239200	LOC_Os01g13770	GO:0009628	P	response to abiotic stimulus	1.36896
OS01G0239200	LOC_Os01g13770	GO:0005215	F	transporter activity	1.36896
OS01G0239200	LOC_Os01g13770	GO:0009536	C	plastid	1.36896
OS01G0239200	LOC_Os01g13770	GO:0016020	C	membrane	1.36896
OS01G0239200	LOC_Os01g13770	GO:0006810	P	transport	1.36896
OS01G0239200	LOC_Os01g13770	GO:0009987	P	cellular process	1.36896
OS01G0239200	LOC_Os01g13770	GO:0009628	P	response to abiotic stimulus	1.36896
OS01G0239200	LOC_Os01g13770	GO:0005215	F	transporter activity	1.36896
OS01G0239200	LOC_Os01g13770	GO:0009536	C	plastid	1.36896
OS01G0267300	LOC_Os01g16200	GO:0005576	C	extracellular region	1.99987
OS01G0267300	LOC_Os01g16200	GO:0008152	P	metabolic process	1.99987
OS01G0267300	LOC_Os01g16200	GO:0030234	F	enzyme regulator activity	1.99987
OS01G0267300	LOC_Os01g16200	GO:0019538	P	protein metabolic process	1.99987
OS01G0267300	LOC_Os01g16200	GO:0008150	P	biological_process	1.99987
OS01G0326300	LOC_Os01g22249	GO:0005783	C	endoplasmic reticulum	1.60434
OS01G0326300	LOC_Os01g22249	GO:0005515	F	protein binding	1.60434
OS01G0326300	LOC_Os01g22249	GO:0006950	P	response to stress	1.60434
OS01G0326300	LOC_Os01g22249	GO:0009628	P	response to abiotic stimulus	1.60434
OS01G0326300	LOC_Os01g22249	GO:0003824	F	catalytic activity	1.60434
OS01G0326300	LOC_Os01g22249	GO:0008152	P	metabolic process	1.60434
OS01G0337500	LOC_Os01g23580	GO:0016020	C	membrane	-2.41648
OS01G0337500	LOC_Os01g23580	GO:0005768	C	endosome	-2.41648
OS01G0337500	LOC_Os01g23580	GO:0006950	P	response to stress	-2.41648
OS01G0337500	LOC_Os01g23580	GO:0009628	P	response to abiotic stimulus	-2.41648
OS01G0337500	LOC_Os01g23580	GO:0005773	C	vacuole	-2.41648
OS01G0337500	LOC_Os01g23580	GO:0006810	P	transport	-2.41648
OS01G0337500	LOC_Os01g23580	GO:0009536	C	plastid	-2.41648
OS01G0337500	LOC_Os01g23580	GO:0005739	C	mitochondrion	-2.41648
OS01G0337500	LOC_Os01g23580	GO:0005886	C	plasma membrane	-2.41648
OS01G0337500	LOC_Os01g23580	GO:0016787	F	hydrolase activity	-2.41648
OS01G0337500	LOC_Os01g23580	GO:0005215	F	transporter activity	-2.41648
OS01G0337500	LOC_Os01g23580	GO:0009987	P	cellular process	-2.41648
OS01G0337500	LOC_Os01g23580	GO:0008152	P	metabolic process	-2.41648
OS01G0337500	LOC_Os01g23580	GO:0007275	P	multicellular organismal development	-2.41648
OS01G0501800	LOC_Os01g31690	GO:0016020	C	membrane	4.18342
OS01G0501800	LOC_Os01g31690	GO:0009536	C	plastid	4.18342
OS01G0501800	LOC_Os01g31690	GO:0009579	C	thylakoid	4.18342
OS01G0501800	LOC_Os01g31690	GO:0006091	P	generation of precursor metabolites and energy	4.18342
OS01G0501800	LOC_Os01g31690	GO:0009628	P	response to abiotic stimulus	4.18342
OS01G0501800	LOC_Os01g31690	GO:0015979	P	photosynthesis	4.18342
OS01G0501800	LOC_Os01g31690	GO:0008152	P	metabolic process	4.18342
OS01G0501800	LOC_Os01g31690	GO:0005515	F	protein binding	4.18342
OS01G0501800	LOC_Os01g31690	GO:0016043	P	cellular component organization	4.18342
OS01G0501800	LOC_Os01g31690	GO:0003824	F	catalytic activity	4.18342
OS01G0501800	LOC_Os01g31690	GO:0006464	P	protein modification process	4.18342
OS01G0501800	LOC_Os01g31690	GO:0003723	F	RNA binding	4.18342
OS01G0501800	LOC_Os01g31690	GO:0016020	C	membrane	4.18342
OS01G0501800	LOC_Os01g31690	GO:0009536	C	plastid	4.18342
OS01G0501800	LOC_Os01g31690	GO:0009579	C	thylakoid	4.18342
OS01G0501800	LOC_Os01g31690	GO:0006091	P	generation of precursor metabolites and energy	4.18342
OS01G0501800	LOC_Os01g31690	GO:0009628	P	response to abiotic stimulus	4.18342
OS01G0501800	LOC_Os01g31690	GO:0015979	P	photosynthesis	4.18342
OS01G0501800	LOC_Os01g31690	GO:0008152	P	metabolic process	4.18342
OS01G0501800	LOC_Os01g31690	GO:0005515	F	protein binding	4.18342
OS01G0501800	LOC_Os01g31690	GO:0016043	P	cellular component organization	4.18342
OS01G0501800	LOC_Os01g31690	GO:0003824	F	catalytic activity	4.18342
OS01G0501800	LOC_Os01g31690	GO:0006464	P	protein modification process	4.18342
OS01G0501800	LOC_Os01g31690	GO:0003723	F	RNA binding	4.18342
OS01G0508300	LOC_Os01g32439	None	None	None	-4.44389
OS01G0510600	LOC_Os01g32730	GO:0016020	C	membrane	1.44224
OS01G0510600	LOC_Os01g32730	GO:0009536	C	plastid	1.44224
OS01G0510600	LOC_Os01g32730	GO:0009579	C	thylakoid	1.44224
OS01G0510600	LOC_Os01g32730	GO:0005488	F	binding	1.44224
OS01G0510600	LOC_Os01g32730	GO:0005515	F	protein binding	1.44224
OS01G0510600	LOC_Os01g32730	GO:0006950	P	response to stress	1.44224
OS01G0510600	LOC_Os01g32730	GO:0009058	P	biosynthetic process	1.44224
OS01G0510600	LOC_Os01g32730	GO:0009987	P	cellular process	1.44224
OS01G0510600	LOC_Os01g32730	GO:0006629	P	lipid metabolic process	1.44224
OS01G0510600	LOC_Os01g32730	GO:0016020	C	membrane	1.44224
OS01G0510600	LOC_Os01g32730	GO:0009536	C	plastid	1.44224
OS01G0510600	LOC_Os01g32730	GO:0009579	C	thylakoid	1.44224
OS01G0510600	LOC_Os01g32730	GO:0005488	F	binding	1.44224
OS01G0510600	LOC_Os01g32730	GO:0005515	F	protein binding	1.44224
OS01G0510600	LOC_Os01g32730	GO:0006950	P	response to stress	1.44224
OS01G0510600	LOC_Os01g32730	GO:0009058	P	biosynthetic process	1.44224
OS01G0510600	LOC_Os01g32730	GO:0009987	P	cellular process	1.44224
OS01G0510600	LOC_Os01g32730	GO:0006629	P	lipid metabolic process	1.44224
OS01G0511600	LOC_Os01g32830	GO:0016020	C	membrane	-2.56639
OS01G0511600	LOC_Os01g32830	GO:0009536	C	plastid	-2.56639
OS01G0552500	None	None	None	None	-6.66735
OS01G0555200	LOC_Os01g37470	GO:0003824	F	catalytic activity	1.62356
OS01G0555200	LOC_Os01g37470	GO:0008152	P	metabolic process	1.62356
OS01G0555200	LOC_Os01g37470	GO:0009987	P	cellular process	1.62356
OS01G0555200	LOC_Os01g37470	GO:0009536	C	plastid	1.62356
OS01G0555200	LOC_Os01g37470	GO:0003824	F	catalytic activity	1.62356
OS01G0555200	LOC_Os01g37470	GO:0008152	P	metabolic process	1.62356
OS01G0555200	LOC_Os01g37470	GO:0009987	P	cellular process	1.62356
OS01G0555200	LOC_Os01g37470	GO:0009536	C	plastid	1.62356
OS01G0566500	LOC_Os01g38580	GO:0009653	P	anatomical structure morphogenesis	-5.12157
OS01G0566500	LOC_Os01g38580	GO:0007275	P	multicellular organismal development	-5.12157
OS01G0566500	LOC_Os01g38580	GO:0003824	F	catalytic activity	-5.12157
OS01G0566500	LOC_Os01g38580	GO:0009719	P	response to endogenous stimulus	-5.12157
OS01G0566500	LOC_Os01g38580	GO:0008152	P	metabolic process	-5.12157
OS01G0566500	LOC_Os01g38580	GO:0009056	P	catabolic process	-5.12157
OS01G0566500	LOC_Os01g38580	GO:0009987	P	cellular process	-5.12157
OS01G0566500	LOC_Os01g38580	GO:0006629	P	lipid metabolic process	-5.12157
OS01G0566500	LOC_Os01g38580	GO:0006810	P	transport	-5.12157
OS01G0566500	LOC_Os01g38580	GO:0009536	C	plastid	-5.12157
OS01G0566500	LOC_Os01g38580	GO:0009653	P	anatomical structure morphogenesis	-5.12157
OS01G0566500	LOC_Os01g38580	GO:0007275	P	multicellular organismal development	-5.12157
OS01G0566500	LOC_Os01g38580	GO:0003824	F	catalytic activity	-5.12157
OS01G0566500	LOC_Os01g38580	GO:0009719	P	response to endogenous stimulus	-5.12157
OS01G0566500	LOC_Os01g38580	GO:0008152	P	metabolic process	-5.12157
OS01G0566500	LOC_Os01g38580	GO:0009056	P	catabolic process	-5.12157
OS01G0566500	LOC_Os01g38580	GO:0009987	P	cellular process	-5.12157
OS01G0566500	LOC_Os01g38580	GO:0006629	P	lipid metabolic process	-5.12157
OS01G0566500	LOC_Os01g38580	GO:0006810	P	transport	-5.12157
OS01G0566500	LOC_Os01g38580	GO:0009536	C	plastid	-5.12157
OS01G0568400	LOC_Os01g38900	GO:0008152	P	metabolic process	-6.92454
OS01G0568400	LOC_Os01g38900	GO:0009987	P	cellular process	-6.92454
OS01G0568400	LOC_Os01g38900	GO:0016301	F	kinase activity	-6.92454
OS01G0568400	LOC_Os01g38900	GO:0005515	F	protein binding	-6.92454
OS01G0568400	LOC_Os01g38900	GO:0000166	F	nucleotide binding	-6.92454
OS01G0568400	LOC_Os01g38900	GO:0006464	P	protein modification process	-6.92454
OS01G0568400	LOC_Os01g38900	GO:0005886	C	plasma membrane	-6.92454
OS01G0589200	LOC_Os01g40660	GO:0005575	C	cellular_component	-2.62972
OS01G0589200	LOC_Os01g40660	GO:0008152	P	metabolic process	-2.62972
OS01G0589200	LOC_Os01g40660	GO:0016740	F	transferase activity	-2.62972
OS01G0589200	LOC_Os01g40660	GO:0009987	P	cellular process	-2.62972
OS01G0609000	LOC_Os01g42350	GO:0016020	C	membrane	-2.31578
OS01G0609000	LOC_Os01g42350	GO:0006950	P	response to stress	-2.31578
OS01G0609000	LOC_Os01g42350	GO:0009607	P	response to biotic stimulus	-2.31578
OS01G0609000	LOC_Os01g42350	GO:0005975	P	carbohydrate metabolic process	-2.31578
OS01G0609000	LOC_Os01g42350	GO:0009056	P	catabolic process	-2.31578
OS01G0609000	LOC_Os01g42350	GO:0009987	P	cellular process	-2.31578
OS01G0609000	LOC_Os01g42350	GO:0019748	P	secondary metabolic process	-2.31578
OS01G0609000	LOC_Os01g42350	GO:0009536	C	plastid	-2.31578
OS01G0609000	LOC_Os01g42350	GO:0005739	C	mitochondrion	-2.31578
OS01G0609000	LOC_Os01g42350	GO:0005886	C	plasma membrane	-2.31578
OS01G0609000	LOC_Os01g42350	GO:0006810	P	transport	-2.31578
OS01G0609000	LOC_Os01g42350	GO:0009719	P	response to endogenous stimulus	-2.31578
OS01G0609000	LOC_Os01g42350	GO:0016787	F	hydrolase activity	-2.31578
OS01G0609000	LOC_Os01g42350	GO:0005215	F	transporter activity	-2.31578
OS01G0609000	LOC_Os01g42350	GO:0005773	C	vacuole	-2.31578
OS01G0609000	LOC_Os01g42350	GO:0006139	P	nucleobase, nucleoside, nucleotide and nucleic acid metabolic process	-2.31578
OS01G0642200	LOC_Os01g45470	None	None	None	2.06205
OS01G0678600	LOC_Os01g48690	GO:0005840	C	ribosome	1.18811
OS01G0678600	LOC_Os01g48690	GO:0016020	C	membrane	1.18811
OS01G0678600	LOC_Os01g48690	GO:0003723	F	RNA binding	1.18811
OS01G0678600	LOC_Os01g48690	GO:0009987	P	cellular process	1.18811
OS01G0678600	LOC_Os01g48690	GO:0006412	P	translation	1.18811
OS01G0678600	LOC_Os01g48690	GO:0005198	F	structural molecule activity	1.18811
OS01G0678600	LOC_Os01g48690	GO:0009536	C	plastid	1.18811
OS01G0678600	LOC_Os01g48690	GO:0005840	C	ribosome	1.18811
OS01G0678600	LOC_Os01g48690	GO:0016020	C	membrane	1.18811
OS01G0678600	LOC_Os01g48690	GO:0003723	F	RNA binding	1.18811
OS01G0678600	LOC_Os01g48690	GO:0009987	P	cellular process	1.18811
OS01G0678600	LOC_Os01g48690	GO:0006412	P	translation	1.18811
OS01G0678600	LOC_Os01g48690	GO:0005198	F	structural molecule activity	1.18811
OS01G0678600	LOC_Os01g48690	GO:0009536	C	plastid	1.18811
OS01G0688000	LOC_Os01g49370	None	None	None	5.43691
OS01G0690800	LOC_Os01g49614	GO:0005623	C	cell	3.65244
OS01G0690800	LOC_Os01g49614	GO:0008152	P	metabolic process	3.65244
OS01G0690800	LOC_Os01g49614	GO:0009987	P	cellular process	3.65244
OS01G0690800	LOC_Os01g49614	GO:0016301	F	kinase activity	3.65244
OS01G0690800	LOC_Os01g49614	GO:0000166	F	nucleotide binding	3.65244
OS01G0690800	LOC_Os01g49614	GO:0006464	P	protein modification process	3.65244
OS01G0690800	LOC_Os01g49614	GO:0008152	P	metabolic process	3.65244
OS01G0690800	LOC_Os01g49614	GO:0009987	P	cellular process	3.65244
OS01G0690800	LOC_Os01g49614	GO:0016301	F	kinase activity	3.65244
OS01G0690800	LOC_Os01g49614	GO:0000166	F	nucleotide binding	3.65244
OS01G0690800	LOC_Os01g49614	GO:0006464	P	protein modification process	3.65244
OS01G0690800	LOC_Os01g49614	GO:0005886	C	plasma membrane	3.65244
OS01G0690800	LOC_Os01g49614	GO:0008152	P	metabolic process	3.65244
OS01G0690800	LOC_Os01g49614	GO:0009987	P	cellular process	3.65244
OS01G0690800	LOC_Os01g49614	GO:0016301	F	kinase activity	3.65244
OS01G0690800	LOC_Os01g49614	GO:0000166	F	nucleotide binding	3.65244
OS01G0690800	LOC_Os01g49614	GO:0006464	P	protein modification process	3.65244
OS01G0690800	LOC_Os01g49614	GO:0005886	C	plasma membrane	3.65244
OS01G0690900	LOC_Os01g49614	GO:0005623	C	cell	9.13479
OS01G0690900	LOC_Os01g49614	GO:0008152	P	metabolic process	9.13479
OS01G0690900	LOC_Os01g49614	GO:0009987	P	cellular process	9.13479
OS01G0690900	LOC_Os01g49614	GO:0016301	F	kinase activity	9.13479
OS01G0690900	LOC_Os01g49614	GO:0000166	F	nucleotide binding	9.13479
OS01G0690900	LOC_Os01g49614	GO:0006464	P	protein modification process	9.13479
OS01G0690900	LOC_Os01g49614	GO:0008152	P	metabolic process	9.13479
OS01G0690900	LOC_Os01g49614	GO:0009987	P	cellular process	9.13479
OS01G0690900	LOC_Os01g49614	GO:0016301	F	kinase activity	9.13479
OS01G0690900	LOC_Os01g49614	GO:0000166	F	nucleotide binding	9.13479
OS01G0690900	LOC_Os01g49614	GO:0006464	P	protein modification process	9.13479
OS01G0690900	LOC_Os01g49614	GO:0005886	C	plasma membrane	9.13479
OS01G0690900	LOC_Os01g49614	GO:0008152	P	metabolic process	9.13479
OS01G0690900	LOC_Os01g49614	GO:0009987	P	cellular process	9.13479
OS01G0690900	LOC_Os01g49614	GO:0016301	F	kinase activity	9.13479
OS01G0690900	LOC_Os01g49614	GO:0000166	F	nucleotide binding	9.13479
OS01G0690900	LOC_Os01g49614	GO:0006464	P	protein modification process	9.13479
OS01G0690900	LOC_Os01g49614	GO:0005886	C	plasma membrane	9.13479
OS01G0693466	None	None	None	None	-7.96043
OS01G0733801	LOC_Os01g53255	None	None	None	-8.61815
OS01G0737401	LOC_Os01g53560	GO:0003677	F	DNA binding	1.78611
OS01G0737401	LOC_Os01g53560	GO:0008152	P	metabolic process	1.78611
OS01G0737401	LOC_Os01g53560	GO:0005488	F	binding	1.78611
OS01G0737401	LOC_Os01g53560	GO:0003824	F	catalytic activity	1.78611
OS01G0737500	LOC_Os01g53570	GO:0008150	P	biological_process	-6.56812
OS01G0753800	LOC_Os01g55000	None	None	None	1.73402
OS01G0776300	LOC_Os01g56850	None	None	None	-5.01345
OS01G0781700	LOC_Os01g57310	GO:0005515	F	protein binding	-2.61304
OS01G0781700	LOC_Os01g57310	GO:0006950	P	response to stress	-2.61304
OS01G0781700	LOC_Os01g57310	GO:0005515	F	protein binding	-2.61304
OS01G0781700	LOC_Os01g57310	GO:0006950	P	response to stress	-2.61304
OS01G0789000	LOC_Os01g57920	GO:0003674	F	molecular_function	-4.12368
OS01G0789000	LOC_Os01g57920	GO:0005575	C	cellular_component	-4.12368
OS01G0789000	LOC_Os01g57920	GO:0008150	P	biological_process	-4.12368
OS01G0791033	None	None	None	None	8.8905
OS01G0794400	LOC_Os01g58194	GO:0009856	P	pollination	2.53507
OS01G0794400	LOC_Os01g58194	GO:0009605	P	response to external stimulus	2.53507
OS01G0794400	LOC_Os01g58194	GO:0007275	P	multicellular organismal development	2.53507
OS01G0794400	LOC_Os01g58194	GO:0008152	P	metabolic process	2.53507
OS01G0794400	LOC_Os01g58194	GO:0016043	P	cellular component organization	2.53507
OS01G0794400	LOC_Os01g58194	GO:0009653	P	anatomical structure morphogenesis	2.53507
OS01G0794400	LOC_Os01g58194	GO:0030154	P	cell differentiation	2.53507
OS01G0794400	LOC_Os01g58194	GO:0016049	P	cell growth	2.53507
OS01G0794400	LOC_Os01g58194	GO:0003674	F	molecular_function	2.53507
OS01G0794400	LOC_Os01g58194	GO:0008150	P	biological_process	2.53507
OS01G0794400	LOC_Os01g58194	GO:0005829	C	cytosol	2.53507
OS01G0794400	LOC_Os01g58194	GO:0003824	F	catalytic activity	2.53507
OS01G0795000	LOC_Os01g58240	GO:0016787	F	hydrolase activity	-2.29515
OS01G0795000	LOC_Os01g58240	GO:0005576	C	extracellular region	-2.29515
OS01G0795000	LOC_Os01g58240	GO:0019538	P	protein metabolic process	-2.29515
OS01G0795000	LOC_Os01g58240	GO:0008152	P	metabolic process	-2.29515
OS01G0795000	LOC_Os01g58240	GO:0005618	C	cell wall	-2.29515
OS01G0795000	LOC_Os01g58240	GO:0005515	F	protein binding	-2.29515
OS01G0805000	LOC_Os01g59060	GO:0005840	C	ribosome	1.4256
OS01G0805000	LOC_Os01g59060	GO:0009987	P	cellular process	1.4256
OS01G0805000	LOC_Os01g59060	GO:0006412	P	translation	1.4256
OS01G0805000	LOC_Os01g59060	GO:0005622	C	intracellular	1.4256
OS01G0805000	LOC_Os01g59060	GO:0005198	F	structural molecule activity	1.4256
OS01G0805000	LOC_Os01g59060	GO:0009536	C	plastid	1.4256
OS01G0827600	LOC_Os01g61190	GO:0005576	C	extracellular region	1.01607
OS01G0827600	LOC_Os01g61190	GO:0005737	C	cytoplasm	1.01607
OS01G0827600	LOC_Os01g61190	GO:0005829	C	cytosol	1.01607
OS01G0827600	LOC_Os01g61190	GO:0006810	P	transport	1.01607
OS01G0827600	LOC_Os01g61190	GO:0009987	P	cellular process	1.01607
OS01G0827600	LOC_Os01g61190	GO:0005886	C	plasma membrane	1.01607
OS01G0843500	None	None	None	None	1.46755
OS01G0871600	LOC_Os01g65110	GO:0016020	C	membrane	2.26272
OS01G0871600	LOC_Os01g65110	GO:0006810	P	transport	2.26272
OS01G0871600	LOC_Os01g65110	GO:0005215	F	transporter activity	2.26272
OS01G0872300	LOC_Os01g65190	GO:0016020	C	membrane	-2.95239
OS01G0872300	LOC_Os01g65190	GO:0006810	P	transport	-2.95239
OS01G0872300	LOC_Os01g65190	GO:0005215	F	transporter activity	-2.95239
OS01G0883100	LOC_Os01g66030	GO:0003677	F	DNA binding	-1.47839
OS01G0883100	LOC_Os01g66030	GO:0005634	C	nucleus	-1.47839
OS01G0883100	LOC_Os01g66030	GO:0009058	P	biosynthetic process	-1.47839
OS01G0883100	LOC_Os01g66030	GO:0006139	P	nucleobase, nucleoside, nucleotide and nucleic acid metabolic process	-1.47839
OS01G0883100	LOC_Os01g66030	GO:0003700	F	sequence-specific DNA binding transcription factor activity	-1.47839
OS01G0883100	LOC_Os01g66030	GO:0005737	C	cytoplasm	-1.47839
OS01G0883100	LOC_Os01g66030	GO:0003677	F	DNA binding	-1.47839
OS01G0883100	LOC_Os01g66030	GO:0005634	C	nucleus	-1.47839
OS01G0883100	LOC_Os01g66030	GO:0009058	P	biosynthetic process	-1.47839
OS01G0883100	LOC_Os01g66030	GO:0006139	P	nucleobase, nucleoside, nucleotide and nucleic acid metabolic process	-1.47839
OS01G0883100	LOC_Os01g66030	GO:0003700	F	sequence-specific DNA binding transcription factor activity	-1.47839
OS01G0883100	LOC_Os01g66030	GO:0005737	C	cytoplasm	-1.47839
OS01G0899387	LOC_Os01g67364	None	None	None	4.58454
OS01G0908600	LOC_Os01g68050	GO:0006810	P	transport	2.59607
OS01G0908600	LOC_Os01g68050	GO:0005215	F	transporter activity	2.59607
OS01G0908600	LOC_Os01g68050	GO:0016020	C	membrane	2.59607
OS01G0908600	LOC_Os01g68050	GO:0009987	P	cellular process	2.59607
OS01G0908600	LOC_Os01g68050	GO:0005886	C	plasma membrane	2.59607
OS01G0908600	LOC_Os01g68050	GO:0006810	P	transport	2.59607
OS01G0908600	LOC_Os01g68050	GO:0005215	F	transporter activity	2.59607
OS01G0908600	LOC_Os01g68050	GO:0016020	C	membrane	2.59607
OS01G0908600	LOC_Os01g68050	GO:0009987	P	cellular process	2.59607
OS01G0908600	LOC_Os01g68050	GO:0005886	C	plasma membrane	2.59607
OS01G0924000	LOC_Os01g69950	GO:0005840	C	ribosome	0.806758
OS01G0924000	LOC_Os01g69950	GO:0006412	P	translation	0.806758
OS01G0924000	LOC_Os01g69950	GO:0005198	F	structural molecule activity	0.806758
OS01G0924000	LOC_Os01g69950	GO:0009579	C	thylakoid	0.806758
OS01G0924000	LOC_Os01g69950	GO:0009536	C	plastid	0.806758
OS01G0944000	LOC_Os01g71620	None	None	None	5.84219
OS01G0958500	LOC_Os01g72834	GO:0003723	F	RNA binding	1.15831
OS01G0958500	LOC_Os01g72834	GO:0000166	F	nucleotide binding	1.15831
OS01G0958500	LOC_Os01g72834	GO:0008150	P	biological_process	1.15831
OS01G0958500	LOC_Os01g72834	GO:0003676	F	nucleic acid binding	1.15831
OS01G0960500	LOC_Os01g73000	GO:0005575	C	cellular_component	1.0336
OS01G0960500	LOC_Os01g73000	GO:0005488	F	binding	1.0336
OS01G0960500	LOC_Os01g73000	GO:0008150	P	biological_process	1.0336
OS01G0960500	LOC_Os01g73000	GO:0005575	C	cellular_component	1.0336
OS01G0960500	LOC_Os01g73000	GO:0005488	F	binding	1.0336
OS01G0960500	LOC_Os01g73000	GO:0008150	P	biological_process	1.0336
OS01G0960600	LOC_Os01g73005	None	None	None	-4.61037
OS01G0960900	None	None	None	None	5.02806
OS01G0961000	LOC_Os01g73024	None	None	None	9.09259
OS01G0969200	LOC_Os01g73800	None	None	None	1.20268
OS01G0971000	LOC_Os01g73940	None	None	None	1.48951
OS01G0973000	LOC_Os01g74152	GO:0008152	P	metabolic process	-1.55765
OS01G0973000	LOC_Os01g74152	GO:0016787	F	hydrolase activity	-1.55765
OS01G0973000	LOC_Os01g74152	GO:0003824	F	catalytic activity	-1.55765
OS01G0974200	LOC_Os01g74300	None	None	None	2.58505
OS02G0104100	LOC_Os02g01355	GO:0005634	C	nucleus	-2.55037
OS02G0104100	LOC_Os02g01355	GO:0009058	P	biosynthetic process	-2.55037
OS02G0104100	LOC_Os02g01355	GO:0006139	P	nucleobase, nucleoside, nucleotide and nucleic acid metabolic process	-2.55037
OS02G0104100	LOC_Os02g01355	GO:0006950	P	response to stress	-2.55037
OS02G0104100	LOC_Os02g01355	GO:0009628	P	response to abiotic stimulus	-2.55037
OS02G0104100	LOC_Os02g01355	GO:0009719	P	response to endogenous stimulus	-2.55037
OS02G0104100	LOC_Os02g01355	GO:0006810	P	transport	-2.55037
OS02G0104100	LOC_Os02g01355	GO:0009987	P	cellular process	-2.55037
OS02G0104100	LOC_Os02g01355	GO:0005737	C	cytoplasm	-2.55037
OS02G0104100	LOC_Os02g01355	GO:0009908	P	flower development	-2.55037
OS02G0104100	LOC_Os02g01355	GO:0030154	P	cell differentiation	-2.55037
OS02G0104100	LOC_Os02g01355	GO:0007275	P	multicellular organismal development	-2.55037
OS02G0104100	LOC_Os02g01355	GO:0005515	F	protein binding	-2.55037
OS02G0104100	LOC_Os02g01355	GO:0003700	F	sequence-specific DNA binding transcription factor activity	-2.55037
OS02G0104100	LOC_Os02g01365	GO:0005634	C	nucleus	-2.55037
OS02G0104100	LOC_Os02g01365	GO:0009058	P	biosynthetic process	-2.55037
OS02G0104100	LOC_Os02g01365	GO:0006139	P	nucleobase, nucleoside, nucleotide and nucleic acid metabolic process	-2.55037
OS02G0104100	LOC_Os02g01365	GO:0006950	P	response to stress	-2.55037
OS02G0104100	LOC_Os02g01365	GO:0009628	P	response to abiotic stimulus	-2.55037
OS02G0104100	LOC_Os02g01365	GO:0009719	P	response to endogenous stimulus	-2.55037
OS02G0104100	LOC_Os02g01365	GO:0006810	P	transport	-2.55037
OS02G0104100	LOC_Os02g01365	GO:0009987	P	cellular process	-2.55037
OS02G0104100	LOC_Os02g01365	GO:0005737	C	cytoplasm	-2.55037
OS02G0104100	LOC_Os02g01365	GO:0009908	P	flower development	-2.55037
OS02G0104100	LOC_Os02g01365	GO:0030154	P	cell differentiation	-2.55037
OS02G0104100	LOC_Os02g01365	GO:0007275	P	multicellular organismal development	-2.55037
OS02G0104100	LOC_Os02g01365	GO:0005515	F	protein binding	-2.55037
OS02G0104100	LOC_Os02g01365	GO:0003700	F	sequence-specific DNA binding transcription factor activity	-2.55037
OS02G0108302	None	None	None	None	-4.39007
OS02G0120600	LOC_Os02g02830	GO:0019538	P	protein metabolic process	2.71006
OS02G0120600	LOC_Os02g02830	GO:0009056	P	catabolic process	2.71006
OS02G0120600	LOC_Os02g02830	GO:0009987	P	cellular process	2.71006
OS02G0120600	LOC_Os02g02830	GO:0006464	P	protein modification process	2.71006
OS02G0120600	LOC_Os02g02830	GO:0005886	C	plasma membrane	2.71006
OS02G0120600	LOC_Os02g02830	GO:0003824	F	catalytic activity	2.71006
OS02G0120600	LOC_Os02g02830	GO:0019538	P	protein metabolic process	2.71006
OS02G0120600	LOC_Os02g02830	GO:0009056	P	catabolic process	2.71006
OS02G0120600	LOC_Os02g02830	GO:0009987	P	cellular process	2.71006
OS02G0120600	LOC_Os02g02830	GO:0006464	P	protein modification process	2.71006
OS02G0120600	LOC_Os02g02830	GO:0005886	C	plasma membrane	2.71006
OS02G0120600	LOC_Os02g02830	GO:0003824	F	catalytic activity	2.71006
OS02G0140200	LOC_Os02g04730	GO:0007275	P	multicellular organismal development	1.96034
OS02G0140200	LOC_Os02g04730	GO:0003824	F	catalytic activity	1.96034
OS02G0140200	LOC_Os02g04730	GO:0016043	P	cellular component organization	1.96034
OS02G0140200	LOC_Os02g04730	GO:0009987	P	cellular process	1.96034
OS02G0140200	LOC_Os02g04730	GO:0009058	P	biosynthetic process	1.96034
OS02G0140200	LOC_Os02g04730	GO:0006629	P	lipid metabolic process	1.96034
OS02G0140200	LOC_Os02g04730	GO:0005773	C	vacuole	1.96034
OS02G0156100	LOC_Os02g06170	None	None	None	-2.97508
OS02G0211500	None	None	None	None	2.47327
OS02G0212500	LOC_Os02g12090	None	None	None	-2.14567
OS02G0223700	LOC_Os02g13060	GO:0003674	F	molecular_function	1.50413
OS02G0223700	LOC_Os02g13060	GO:0005575	C	cellular_component	1.50413
OS02G0223700	LOC_Os02g13060	GO:0008150	P	biological_process	1.50413
OS02G0257300	LOC_Os02g15750	GO:0006091	P	generation of precursor metabolites and energy	1.95658
OS02G0257300	LOC_Os02g15750	GO:0015979	P	photosynthesis	1.95658
OS02G0257300	LOC_Os02g15750	GO:0016020	C	membrane	1.95658
OS02G0257300	LOC_Os02g15750	GO:0009536	C	plastid	1.95658
OS02G0257300	LOC_Os02g15750	GO:0009579	C	thylakoid	1.95658
OS02G0257300	LOC_Os02g15750	GO:0005515	F	protein binding	1.95658
OS02G0257300	LOC_Os02g15750	GO:0006950	P	response to stress	1.95658
OS02G0257300	LOC_Os02g15750	GO:0009607	P	response to biotic stimulus	1.95658
OS02G0259600	LOC_Os02g15900	GO:0005840	C	ribosome	1.51606
OS02G0259600	LOC_Os02g15900	GO:0003723	F	RNA binding	1.51606
OS02G0259600	LOC_Os02g15900	GO:0005634	C	nucleus	1.51606
OS02G0259600	LOC_Os02g15900	GO:0006950	P	response to stress	1.51606
OS02G0259600	LOC_Os02g15900	GO:0009628	P	response to abiotic stimulus	1.51606
OS02G0259600	LOC_Os02g15900	GO:0006412	P	translation	1.51606
OS02G0259600	LOC_Os02g15900	GO:0005198	F	structural molecule activity	1.51606
OS02G0259600	LOC_Os02g15900	GO:0009536	C	plastid	1.51606
OS02G0302700	LOC_Os02g19970	GO:0009056	P	catabolic process	-1.61898
OS02G0302700	LOC_Os02g19970	GO:0009987	P	cellular process	-1.61898
OS02G0302700	LOC_Os02g19970	GO:0008152	P	metabolic process	-1.61898
OS02G0302700	LOC_Os02g19970	GO:0005829	C	cytosol	-1.61898
OS02G0302700	LOC_Os02g19970	GO:0016740	F	transferase activity	-1.61898
OS02G0302700	LOC_Os02g19970	GO:0009056	P	catabolic process	-1.61898
OS02G0302700	LOC_Os02g19970	GO:0009987	P	cellular process	-1.61898
OS02G0302700	LOC_Os02g19970	GO:0008152	P	metabolic process	-1.61898
OS02G0302700	LOC_Os02g19970	GO:0005829	C	cytosol	-1.61898
OS02G0302700	LOC_Os02g19970	GO:0016740	F	transferase activity	-1.61898
OS02G0304900	LOC_Os02g20170	GO:0006950	P	response to stress	-0.251591
OS02G0304900	LOC_Os02g20170	GO:0009628	P	response to abiotic stimulus	-0.251591
OS02G0435200	None	None	None	None	-2.98357
OS02G0494400	LOC_Os02g29210	GO:0005575	C	cellular_component	-1.65387
OS02G0494400	LOC_Os02g29210	GO:0008150	P	biological_process	-1.65387
OS02G0494400	LOC_Os02g29210	GO:0005488	F	binding	-1.65387
OS02G0494400	LOC_Os02g29210	GO:0005575	C	cellular_component	-1.65387
OS02G0494400	LOC_Os02g29210	GO:0008150	P	biological_process	-1.65387
OS02G0494400	LOC_Os02g29210	GO:0005488	F	binding	-1.65387
OS02G0494400	LOC_Os02g29210	GO:0005575	C	cellular_component	-1.65387
OS02G0494400	LOC_Os02g29210	GO:0008150	P	biological_process	-1.65387
OS02G0494400	LOC_Os02g29210	GO:0005488	F	binding	-1.65387
OS02G0494400	LOC_Os02g29210	GO:0005575	C	cellular_component	-1.65387
OS02G0494400	LOC_Os02g29210	GO:0008150	P	biological_process	-1.65387
OS02G0494400	LOC_Os02g29210	GO:0005488	F	binding	-1.65387
OS02G0498100	LOC_Os02g29500	None	None	None	4.82562
OS02G0503900	LOC_Os02g30100	GO:0005623	C	cell	-0.360559
OS02G0503900	LOC_Os02g30100	GO:0003674	F	molecular_function	-0.360559
OS02G0503900	LOC_Os02g30100	GO:0005488	F	binding	-0.360559
OS02G0503900	LOC_Os02g30100	GO:0003824	F	catalytic activity	-0.360559
OS02G0503900	LOC_Os02g30100	GO:0008152	P	metabolic process	-0.360559
OS02G0503900	LOC_Os02g30100	GO:0019825	F	oxygen binding	-0.360559
OS02G0505700	None	None	None	None	-6.43293
OS02G0512000	LOC_Os02g30810	GO:0003674	F	molecular_function	1.38504
OS02G0512000	LOC_Os02g30810	GO:0009719	P	response to endogenous stimulus	1.38504
OS02G0555700	LOC_Os02g35000	GO:0019538	P	protein metabolic process	-1.07974
OS02G0555700	LOC_Os02g35000	GO:0009987	P	cellular process	-1.07974
OS02G0555700	LOC_Os02g35000	GO:0005575	C	cellular_component	-1.07974
OS02G0555700	LOC_Os02g35000	GO:0005515	F	protein binding	-1.07974
OS02G0595700	LOC_Os02g38210	GO:0016020	C	membrane	1.40485
OS02G0595700	LOC_Os02g38210	GO:0005576	C	extracellular region	1.40485
OS02G0595700	LOC_Os02g38210	GO:0009536	C	plastid	1.40485
OS02G0595700	LOC_Os02g38210	GO:0009579	C	thylakoid	1.40485
OS02G0595700	LOC_Os02g38210	GO:0008135	F	translation factor activity, nucleic acid binding	1.40485
OS02G0595700	LOC_Os02g38210	GO:0006412	P	translation	1.40485
OS02G0595700	LOC_Os02g38210	GO:0005515	F	protein binding	1.40485
OS02G0595700	LOC_Os02g38210	GO:0005730	C	nucleolus	1.40485
OS02G0595700	LOC_Os02g38210	GO:0005634	C	nucleus	1.40485
OS02G0595700	LOC_Os02g38210	GO:0009056	P	catabolic process	1.40485
OS02G0595700	LOC_Os02g38210	GO:0006139	P	nucleobase, nucleoside, nucleotide and nucleic acid metabolic process	1.40485
OS02G0595700	LOC_Os02g38210	GO:0016787	F	hydrolase activity	1.40485
OS02G0595700	LOC_Os02g38210	GO:0006464	P	protein modification process	1.40485
OS02G0595700	LOC_Os02g38210	GO:0000166	F	nucleotide binding	1.40485
OS02G0595700	LOC_Os02g38210	GO:0005622	C	intracellular	1.40485
OS02G0612900	LOC_Os02g39930	GO:0006810	P	transport	2.93183
OS02G0612900	LOC_Os02g39930	GO:0005783	C	endoplasmic reticulum	2.93183
OS02G0612900	LOC_Os02g39930	GO:0005575	C	cellular_component	2.93183
OS02G0612900	LOC_Os02g39930	GO:0006950	P	response to stress	2.93183
OS02G0612900	LOC_Os02g39930	GO:0009628	P	response to abiotic stimulus	2.93183
OS02G0612900	LOC_Os02g39930	GO:0005488	F	binding	2.93183
OS02G0612900	LOC_Os02g39930	GO:0005773	C	vacuole	2.93183
OS02G0612900	LOC_Os02g39930	GO:0016020	C	membrane	2.93183
OS02G0612900	LOC_Os02g39930	GO:0005739	C	mitochondrion	2.93183
OS02G0612900	LOC_Os02g39930	GO:0005886	C	plasma membrane	2.93183
OS02G0612900	LOC_Os02g39930	GO:0005215	F	transporter activity	2.93183
OS02G0652600	LOC_Os02g43600	GO:0005840	C	ribosome	1.06229
OS02G0652600	LOC_Os02g43600	GO:0016020	C	membrane	1.06229
OS02G0652600	LOC_Os02g43600	GO:0009987	P	cellular process	1.06229
OS02G0652600	LOC_Os02g43600	GO:0006412	P	translation	1.06229
OS02G0652600	LOC_Os02g43600	GO:0005198	F	structural molecule activity	1.06229
OS02G0652600	LOC_Os02g43600	GO:0009536	C	plastid	1.06229
OS02G0801255	LOC_Os02g55670	GO:0008152	P	metabolic process	6.15207
OS02G0801255	LOC_Os02g55670	GO:0009987	P	cellular process	6.15207
OS02G0801255	LOC_Os02g55670	GO:0005634	C	nucleus	6.15207
OS02G0801255	LOC_Os02g55670	GO:0005515	F	protein binding	6.15207
OS02G0801255	LOC_Os02g55670	GO:0030234	F	enzyme regulator activity	6.15207
OS02G0801255	LOC_Os02g55670	GO:0007049	P	cell cycle	6.15207
OS02G0801255	LOC_Os02g55770	GO:0008152	P	metabolic process	6.15207
OS02G0801255	LOC_Os02g55770	GO:0009987	P	cellular process	6.15207
OS02G0801255	LOC_Os02g55770	GO:0005634	C	nucleus	6.15207
OS02G0801255	LOC_Os02g55770	GO:0005515	F	protein binding	6.15207
OS02G0801255	LOC_Os02g55770	GO:0030234	F	enzyme regulator activity	6.15207
OS02G0801255	LOC_Os02g55770	GO:0007049	P	cell cycle	6.15207
OS02G0801255	LOC_Os02g55770	GO:0008152	P	metabolic process	6.15207
OS02G0801255	LOC_Os02g55770	GO:0009987	P	cellular process	6.15207
OS02G0801255	LOC_Os02g55770	GO:0005634	C	nucleus	6.15207
OS02G0801255	LOC_Os02g55770	GO:0005515	F	protein binding	6.15207
OS02G0801255	LOC_Os02g55770	GO:0030234	F	enzyme regulator activity	6.15207
OS02G0801255	LOC_Os02g55770	GO:0007049	P	cell cycle	6.15207
OS02G0815200	LOC_Os02g57010	GO:0003723	F	RNA binding	2.58346
OS02G0815200	LOC_Os02g57010	GO:0000166	F	nucleotide binding	2.58346
OS02G0815200	LOC_Os02g57010	GO:0008150	P	biological_process	2.58346
OS02G0815200	LOC_Os02g57010	GO:0003676	F	nucleic acid binding	2.58346
OS02G0815200	LOC_Os02g57010	GO:0009536	C	plastid	2.58346
OS03G0121700	LOC_Os03g02960	GO:0005575	C	cellular_component	2.40765
OS03G0121700	LOC_Os03g02960	GO:0005829	C	cytosol	2.40765
OS03G0121700	LOC_Os03g02960	GO:0006950	P	response to stress	2.40765
OS03G0121700	LOC_Os03g02960	GO:0009628	P	response to abiotic stimulus	2.40765
OS03G0121700	LOC_Os03g02960	GO:0005840	C	ribosome	2.40765
OS03G0122200	LOC_Os03g03020	GO:0005840	C	ribosome	1.38638
OS03G0122200	LOC_Os03g03020	GO:0016020	C	membrane	1.38638
OS03G0122200	LOC_Os03g03020	GO:0005829	C	cytosol	1.38638
OS03G0122200	LOC_Os03g03020	GO:0009987	P	cellular process	1.38638
OS03G0122200	LOC_Os03g03020	GO:0006412	P	translation	1.38638
OS03G0122200	LOC_Os03g03020	GO:0005198	F	structural molecule activity	1.38638
OS03G0122200	LOC_Os03g03020	GO:0009536	C	plastid	1.38638
OS03G0129300	LOC_Os03g03720	GO:0016020	C	membrane	5.05225
OS03G0129300	LOC_Os03g03720	GO:0005576	C	extracellular region	5.05225
OS03G0129300	LOC_Os03g03720	GO:0009536	C	plastid	5.05225
OS03G0129300	LOC_Os03g03720	GO:0009579	C	thylakoid	5.05225
OS03G0129300	LOC_Os03g03720	GO:0009628	P	response to abiotic stimulus	5.05225
OS03G0129300	LOC_Os03g03720	GO:0005975	P	carbohydrate metabolic process	5.05225
OS03G0129300	LOC_Os03g03720	GO:0006091	P	generation of precursor metabolites and energy	5.05225
OS03G0129300	LOC_Os03g03720	GO:0009056	P	catabolic process	5.05225
OS03G0129300	LOC_Os03g03720	GO:0008152	P	metabolic process	5.05225
OS03G0129300	LOC_Os03g03720	GO:0005515	F	protein binding	5.05225
OS03G0129300	LOC_Os03g03720	GO:0006950	P	response to stress	5.05225
OS03G0129300	LOC_Os03g03720	GO:0008150	P	biological_process	5.05225
OS03G0129300	LOC_Os03g03720	GO:0003824	F	catalytic activity	5.05225
OS03G0129300	LOC_Os03g03720	GO:0009058	P	biosynthetic process	5.05225
OS03G0129300	LOC_Os03g03720	GO:0015979	P	photosynthesis	5.05225
OS03G0129300	LOC_Os03g03720	GO:0016020	C	membrane	5.05225
OS03G0129300	LOC_Os03g03720	GO:0005576	C	extracellular region	5.05225
OS03G0129300	LOC_Os03g03720	GO:0009536	C	plastid	5.05225
OS03G0129300	LOC_Os03g03720	GO:0009579	C	thylakoid	5.05225
OS03G0129300	LOC_Os03g03720	GO:0009628	P	response to abiotic stimulus	5.05225
OS03G0129300	LOC_Os03g03720	GO:0005975	P	carbohydrate metabolic process	5.05225
OS03G0129300	LOC_Os03g03720	GO:0006091	P	generation of precursor metabolites and energy	5.05225
OS03G0129300	LOC_Os03g03720	GO:0009056	P	catabolic process	5.05225
OS03G0129300	LOC_Os03g03720	GO:0008152	P	metabolic process	5.05225
OS03G0129300	LOC_Os03g03720	GO:0005515	F	protein binding	5.05225
OS03G0129300	LOC_Os03g03720	GO:0006950	P	response to stress	5.05225
OS03G0129300	LOC_Os03g03720	GO:0008150	P	biological_process	5.05225
OS03G0129300	LOC_Os03g03720	GO:0003824	F	catalytic activity	5.05225
OS03G0129300	LOC_Os03g03720	GO:0009058	P	biosynthetic process	5.05225
OS03G0129300	LOC_Os03g03720	GO:0015979	P	photosynthesis	5.05225
OS03G0165400	LOC_Os03g06940	GO:0005623	C	cell	-0.947644
OS03G0165400	LOC_Os03g06940	GO:0008152	P	metabolic process	-0.947644
OS03G0165400	LOC_Os03g06940	GO:0005515	F	protein binding	-0.947644
OS03G0165400	LOC_Os03g06940	GO:0016787	F	hydrolase activity	-0.947644
OS03G0165400	LOC_Os03g06940	GO:0005975	P	carbohydrate metabolic process	-0.947644
OS03G0165400	LOC_Os03g06940	GO:0009987	P	cellular process	-0.947644
OS03G0165400	LOC_Os03g06940	GO:0009056	P	catabolic process	-0.947644
OS03G0165400	LOC_Os03g06940	GO:0005623	C	cell	-0.947644
OS03G0165400	LOC_Os03g06940	GO:0008152	P	metabolic process	-0.947644
OS03G0165400	LOC_Os03g06940	GO:0005515	F	protein binding	-0.947644
OS03G0165400	LOC_Os03g06940	GO:0016787	F	hydrolase activity	-0.947644
OS03G0165400	LOC_Os03g06940	GO:0005975	P	carbohydrate metabolic process	-0.947644
OS03G0165400	LOC_Os03g06940	GO:0009987	P	cellular process	-0.947644
OS03G0165400	LOC_Os03g06940	GO:0009056	P	catabolic process	-0.947644
OS03G0170200	LOC_Os03g07410	None	None	None	2.90919
OS03G0173500	LOC_Os03g07739	None	None	None	-1.1813
OS03G0223301	LOC_Os03g12280	None	None	None	-9.36495
OS03G0223400	LOC_Os03g12290	GO:0008152	P	metabolic process	1.62877
OS03G0223400	LOC_Os03g12290	GO:0003824	F	catalytic activity	1.62877
OS03G0223400	LOC_Os03g12290	GO:0005575	C	cellular_component	1.62877
OS03G0223400	LOC_Os03g12290	GO:0005618	C	cell wall	1.62877
OS03G0223400	LOC_Os03g12290	GO:0005515	F	protein binding	1.62877
OS03G0223400	LOC_Os03g12290	GO:0005829	C	cytosol	1.62877
OS03G0223400	LOC_Os03g12290	GO:0005488	F	binding	1.62877
OS03G0223400	LOC_Os03g12290	GO:0005886	C	plasma membrane	1.62877
OS03G0223400	LOC_Os03g12290	GO:0005840	C	ribosome	1.62877
OS03G0259900	LOC_Os03g15410	GO:0005623	C	cell	1.91772
OS03G0259900	LOC_Os03g15410	GO:0003674	F	molecular_function	1.91772
OS03G0259900	LOC_Os03g15410	GO:0008150	P	biological_process	1.91772
OS03G0271500	LOC_Os03g16470	None	None	None	1.21871
OS03G0278900	LOC_Os03g17070	GO:0016020	C	membrane	1.3672
OS03G0278900	LOC_Os03g17070	GO:0009536	C	plastid	1.3672
OS03G0278900	LOC_Os03g17070	GO:0009579	C	thylakoid	1.3672
OS03G0278900	LOC_Os03g17070	GO:0006810	P	transport	1.3672
OS03G0278900	LOC_Os03g17070	GO:0009987	P	cellular process	1.3672
OS03G0278900	LOC_Os03g17070	GO:0006950	P	response to stress	1.3672
OS03G0278900	LOC_Os03g17070	GO:0009607	P	response to biotic stimulus	1.3672
OS03G0278900	LOC_Os03g17070	GO:0005215	F	transporter activity	1.3672
OS03G0293100	LOC_Os03g18200	GO:0019538	P	protein metabolic process	3.06121
OS03G0293100	LOC_Os03g18200	GO:0009987	P	cellular process	3.06121
OS03G0293100	LOC_Os03g18200	GO:0005783	C	endoplasmic reticulum	3.06121
OS03G0293100	LOC_Os03g18200	GO:0005575	C	cellular_component	3.06121
OS03G0293100	LOC_Os03g18200	GO:0006950	P	response to stress	3.06121
OS03G0293100	LOC_Os03g18200	GO:0009628	P	response to abiotic stimulus	3.06121
OS03G0293100	LOC_Os03g18200	GO:0008152	P	metabolic process	3.06121
OS03G0293100	LOC_Os03g18200	GO:0009856	P	pollination	3.06121
OS03G0293100	LOC_Os03g18200	GO:0016043	P	cellular component organization	3.06121
OS03G0293100	LOC_Os03g18200	GO:0009653	P	anatomical structure morphogenesis	3.06121
OS03G0293100	LOC_Os03g18200	GO:0030154	P	cell differentiation	3.06121
OS03G0293100	LOC_Os03g18200	GO:0016049	P	cell growth	3.06121
OS03G0293100	LOC_Os03g18200	GO:0007275	P	multicellular organismal development	3.06121
OS03G0293100	LOC_Os03g18200	GO:0003824	F	catalytic activity	3.06121
OS03G0293100	LOC_Os03g18200	GO:0019538	P	protein metabolic process	3.06121
OS03G0293100	LOC_Os03g18200	GO:0009987	P	cellular process	3.06121
OS03G0293100	LOC_Os03g18200	GO:0005783	C	endoplasmic reticulum	3.06121
OS03G0293100	LOC_Os03g18200	GO:0005575	C	cellular_component	3.06121
OS03G0293100	LOC_Os03g18200	GO:0006950	P	response to stress	3.06121
OS03G0293100	LOC_Os03g18200	GO:0009628	P	response to abiotic stimulus	3.06121
OS03G0293100	LOC_Os03g18200	GO:0008152	P	metabolic process	3.06121
OS03G0293100	LOC_Os03g18200	GO:0009856	P	pollination	3.06121
OS03G0293100	LOC_Os03g18200	GO:0016043	P	cellular component organization	3.06121
OS03G0293100	LOC_Os03g18200	GO:0009653	P	anatomical structure morphogenesis	3.06121
OS03G0293100	LOC_Os03g18200	GO:0030154	P	cell differentiation	3.06121
OS03G0293100	LOC_Os03g18200	GO:0016049	P	cell growth	3.06121
OS03G0293100	LOC_Os03g18200	GO:0007275	P	multicellular organismal development	3.06121
OS03G0293100	LOC_Os03g18200	GO:0003824	F	catalytic activity	3.06121
OS03G0306800	LOC_Os03g19380	GO:0009058	P	biosynthetic process	4.17151
OS03G0306800	LOC_Os03g19380	GO:0005975	P	carbohydrate metabolic process	4.17151
OS03G0306800	LOC_Os03g19380	GO:0015979	P	photosynthesis	4.17151
OS03G0306800	LOC_Os03g19380	GO:0003674	F	molecular_function	4.17151
OS03G0306800	LOC_Os03g19380	GO:0005515	F	protein binding	4.17151
OS03G0306800	LOC_Os03g19380	GO:0009536	C	plastid	4.17151
OS03G0315800	LOC_Os03g20100	GO:0016020	C	membrane	1.21031
OS03G0315800	LOC_Os03g20100	GO:0003723	F	RNA binding	1.21031
OS03G0315800	LOC_Os03g20100	GO:0009579	C	thylakoid	1.21031
OS03G0315800	LOC_Os03g20100	GO:0009536	C	plastid	1.21031
OS03G0343900	LOC_Os03g22370	None	None	None	5.27195
OS03G0344400	None	None	None	None	-7.27923
OS03G0379500	LOC_Os03g26229	GO:0016020	C	membrane	-4.68263
OS03G0379500	LOC_Os03g26229	GO:0005575	C	cellular_component	-4.68263
OS03G0379500	LOC_Os03g26229	GO:0005773	C	vacuole	-4.68263
OS03G0379500	LOC_Os03g26229	GO:0005618	C	cell wall	-4.68263
OS03G0379500	LOC_Os03g26229	GO:0005730	C	nucleolus	-4.68263
OS03G0379500	LOC_Os03g26229	GO:0005829	C	cytosol	-4.68263
OS03G0379500	LOC_Os03g26229	GO:0006412	P	translation	-4.68263
OS03G0379500	LOC_Os03g26229	GO:0005840	C	ribosome	-4.68263
OS03G0379500	LOC_Os03g26229	GO:0005198	F	structural molecule activity	-4.68263
OS03G0379500	LOC_Os03g26229	GO:0009536	C	plastid	-4.68263
OS03G0563300	LOC_Os03g36540	GO:0009536	C	plastid	1.00783
OS03G0563300	LOC_Os03g36540	GO:0003824	F	catalytic activity	1.00783
OS03G0563300	LOC_Os03g36540	GO:0009056	P	catabolic process	1.00783
OS03G0563300	LOC_Os03g36540	GO:0006139	P	nucleobase, nucleoside, nucleotide and nucleic acid metabolic process	1.00783
OS03G0563300	LOC_Os03g36540	GO:0009058	P	biosynthetic process	1.00783
OS03G0563300	LOC_Os03g36540	GO:0009987	P	cellular process	1.00783
OS03G0563300	LOC_Os03g36540	GO:0016787	F	hydrolase activity	1.00783
OS03G0563300	LOC_Os03g36540	GO:0009536	C	plastid	1.00783
OS03G0563300	LOC_Os03g36540	GO:0003824	F	catalytic activity	1.00783
OS03G0563300	LOC_Os03g36540	GO:0009056	P	catabolic process	1.00783
OS03G0563300	LOC_Os03g36540	GO:0006139	P	nucleobase, nucleoside, nucleotide and nucleic acid metabolic process	1.00783
OS03G0563300	LOC_Os03g36540	GO:0009058	P	biosynthetic process	1.00783
OS03G0563300	LOC_Os03g36540	GO:0009987	P	cellular process	1.00783
OS03G0563300	LOC_Os03g36540	GO:0016787	F	hydrolase activity	1.00783
OS03G0582900	None	None	None	None	9.97219
OS03G0598002	None	None	None	None	10.1214
OS03G0599000	LOC_Os03g40194	GO:0005515	F	protein binding	1.668
OS03G0599000	LOC_Os03g40194	GO:0006950	P	response to stress	1.668
OS03G0608700	LOC_Os03g41200	None	None	None	-13.4174
OS03G0638800	LOC_Os03g43760	GO:0008152	P	metabolic process	0.661564
OS03G0638800	LOC_Os03g43760	GO:0009987	P	cellular process	0.661564
OS03G0638800	LOC_Os03g43760	GO:0016301	F	kinase activity	0.661564
OS03G0638800	LOC_Os03g43760	GO:0005515	F	protein binding	0.661564
OS03G0638800	LOC_Os03g43760	GO:0000166	F	nucleotide binding	0.661564
OS03G0638800	LOC_Os03g43760	GO:0006464	P	protein modification process	0.661564
OS03G0638800	LOC_Os03g43760	GO:0005886	C	plasma membrane	0.661564
OS03G0643433	None	None	None	None	7.10661
OS03G0643700	LOC_Os03g44170	GO:0016740	F	transferase activity	-9.19409
OS03G0643700	LOC_Os03g44170	GO:0009056	P	catabolic process	-9.19409
OS03G0643700	LOC_Os03g44170	GO:0009987	P	cellular process	-9.19409
OS03G0643700	LOC_Os03g44170	GO:0019748	P	secondary metabolic process	-9.19409
OS03G0643700	LOC_Os03g44170	GO:0008152	P	metabolic process	-9.19409
OS03G0643700	LOC_Os03g44170	GO:0005488	F	binding	-9.19409
OS03G0643700	LOC_Os03g44170	GO:0005737	C	cytoplasm	-9.19409
OS03G0643900	LOC_Os03g44190	None	None	None	10.5508
OS03G0661800	LOC_Os03g45970	None	None	None	-6.81406
OS03G0663100	LOC_Os03g46040	None	None	None	-3.50923
OS03G0665200	LOC_Os03g46260	GO:0003674	F	molecular_function	-0.905925
OS03G0665200	LOC_Os03g46260	GO:0003674	F	molecular_function	-0.905925
OS03G0665200	LOC_Os03g46260	GO:0003674	F	molecular_function	-0.905925
OS03G0667300	LOC_Os03g46454	GO:0019725	P	cellular homeostasis	11.3349
OS03G0667300	LOC_Os03g46454	GO:0006810	P	transport	11.3349
OS03G0667300	LOC_Os03g46454	GO:0009987	P	cellular process	11.3349
OS03G0667300	LOC_Os03g46454	GO:0009719	P	response to endogenous stimulus	11.3349
OS03G0667300	LOC_Os03g46454	GO:0005215	F	transporter activity	11.3349
OS03G0667300	LOC_Os03g46454	GO:0006950	P	response to stress	11.3349
OS03G0667300	LOC_Os03g46454	GO:0009628	P	response to abiotic stimulus	11.3349
OS03G0667300	LOC_Os03g46454	GO:0005886	C	plasma membrane	11.3349
OS03G0667300	LOC_Os03g46454	GO:0005794	C	Golgi apparatus	11.3349
OS03G0667300	LOC_Os03g46454	GO:0009607	P	response to biotic stimulus	11.3349
OS03G0673700	None	None	None	None	4.7342
OS03G0680200	LOC_Os03g47650	GO:0005575	C	cellular_component	-2.15336
OS03G0680200	LOC_Os03g47650	GO:0008150	P	biological_process	-2.15336
OS03G0680200	LOC_Os03g47650	GO:0005488	F	binding	-2.15336
OS03G0699950	LOC_Os03g49280	None	None	None	-5.51669
OS03G0721900	LOC_Os03g51200	GO:0003677	F	DNA binding	-0.479023
OS03G0721900	LOC_Os03g51200	GO:0005634	C	nucleus	-0.479023
OS03G0721900	LOC_Os03g51200	GO:0005730	C	nucleolus	-0.479023
OS03G0721900	LOC_Os03g51200	GO:0016043	P	cellular component organization	-0.479023
OS03G0721900	LOC_Os03g51200	GO:0006259	P	DNA metabolic process	-0.479023
OS03G0724100	LOC_Os03g51430	GO:0006810	P	transport	-1.74204
OS03G0724100	LOC_Os03g51430	GO:0005215	F	transporter activity	-1.74204
OS03G0724100	LOC_Os03g51430	GO:0006810	P	transport	-1.74204
OS03G0724100	LOC_Os03g51430	GO:0005215	F	transporter activity	-1.74204
OS03G0751400	LOC_Os03g54040	GO:0016020	C	membrane	1.66424
OS03G0751400	LOC_Os03g54040	GO:0005840	C	ribosome	1.66424
OS03G0751400	LOC_Os03g54040	GO:0006412	P	translation	1.66424
OS03G0751400	LOC_Os03g54040	GO:0009536	C	plastid	1.66424
OS03G0751400	LOC_Os03g54040	GO:0005198	F	structural molecule activity	1.66424
OS03G0751400	LOC_Os03g54040	GO:0003723	F	RNA binding	1.66424
OS03G0751400	LOC_Os03g54040	GO:0000003	P	reproduction	1.66424
OS03G0751400	LOC_Os03g54040	GO:0009791	P	post-embryonic development	1.66424
OS03G0751400	LOC_Os03g54040	GO:0009790	P	embryo development	1.66424
OS03G0767900	LOC_Os03g55870	GO:0003674	F	molecular_function	1.33913
OS03G0767900	LOC_Os03g55870	GO:0016020	C	membrane	1.33913
OS03G0767900	LOC_Os03g55870	GO:0008150	P	biological_process	1.33913
OS03G0767900	LOC_Os03g55870	GO:0003674	F	molecular_function	1.33913
OS03G0767900	LOC_Os03g55870	GO:0016020	C	membrane	1.33913
OS03G0767900	LOC_Os03g55870	GO:0008150	P	biological_process	1.33913
OS03G0768450	None	None	None	None	6.07018
OS03G0778100	LOC_Os03g56670	GO:0016020	C	membrane	2.60696
OS03G0778100	LOC_Os03g56670	GO:0009536	C	plastid	2.60696
OS03G0778100	LOC_Os03g56670	GO:0009579	C	thylakoid	2.60696
OS03G0778100	LOC_Os03g56670	GO:0003674	F	molecular_function	2.60696
OS03G0778100	LOC_Os03g56670	GO:0015979	P	photosynthesis	2.60696
OS03G0778100	LOC_Os03g56670	GO:0016020	C	membrane	2.60696
OS03G0778100	LOC_Os03g56670	GO:0009536	C	plastid	2.60696
OS03G0778100	LOC_Os03g56670	GO:0009579	C	thylakoid	2.60696
OS03G0778100	LOC_Os03g56670	GO:0003674	F	molecular_function	2.60696
OS03G0778100	LOC_Os03g56670	GO:0015979	P	photosynthesis	2.60696
OS03G0815400	LOC_Os03g60100	GO:0005840	C	ribosome	1.70589
OS03G0815400	LOC_Os03g60100	GO:0006412	P	translation	1.70589
OS03G0815400	LOC_Os03g60100	GO:0005198	F	structural molecule activity	1.70589
OS03G0815400	LOC_Os03g60100	GO:0009536	C	plastid	1.70589
OS03G0844900	LOC_Os03g62780	GO:0003723	F	RNA binding	4.57897
OS03G0844900	LOC_Os03g62780	GO:0005634	C	nucleus	4.57897
OS03G0844900	LOC_Os03g62780	GO:0006950	P	response to stress	4.57897
OS03G0844900	LOC_Os03g62780	GO:0009628	P	response to abiotic stimulus	4.57897
OS03G0844900	LOC_Os03g62780	GO:0009536	C	plastid	4.57897
OS03G0844900	LOC_Os03g62780	GO:0003723	F	RNA binding	4.57897
OS03G0844900	LOC_Os03g62780	GO:0005634	C	nucleus	4.57897
OS03G0844900	LOC_Os03g62780	GO:0006950	P	response to stress	4.57897
OS03G0844900	LOC_Os03g62780	GO:0009628	P	response to abiotic stimulus	4.57897
OS03G0844900	LOC_Os03g62780	GO:0009536	C	plastid	4.57897
OS03G0847500	LOC_Os03g63010	GO:0009628	P	response to abiotic stimulus	4.54753
OS03G0847500	LOC_Os03g63010	GO:0016043	P	cellular component organization	4.54753
OS03G0847500	LOC_Os03g63010	GO:0009987	P	cellular process	4.54753
OS03G0847500	LOC_Os03g63010	GO:0008152	P	metabolic process	4.54753
OS03G0847500	LOC_Os03g63010	GO:0009579	C	thylakoid	4.54753
OS03G0847500	LOC_Os03g63010	GO:0009058	P	biosynthetic process	4.54753
OS03G0847500	LOC_Os03g63010	GO:0006629	P	lipid metabolic process	4.54753
OS03G0847500	LOC_Os03g63010	GO:0003824	F	catalytic activity	4.54753
OS03G0847500	LOC_Os03g63010	GO:0009628	P	response to abiotic stimulus	4.54753
OS03G0847500	LOC_Os03g63010	GO:0016043	P	cellular component organization	4.54753
OS03G0847500	LOC_Os03g63010	GO:0009987	P	cellular process	4.54753
OS03G0847500	LOC_Os03g63010	GO:0008152	P	metabolic process	4.54753
OS03G0847500	LOC_Os03g63010	GO:0009579	C	thylakoid	4.54753
OS03G0847500	LOC_Os03g63010	GO:0009058	P	biosynthetic process	4.54753
OS03G0847500	LOC_Os03g63010	GO:0006629	P	lipid metabolic process	4.54753
OS03G0847500	LOC_Os03g63010	GO:0003824	F	catalytic activity	4.54753
OS03G0853200	LOC_Os03g63620	GO:0003674	F	molecular_function	-3.49249
OS03G0853200	LOC_Os03g63620	GO:0005575	C	cellular_component	-3.49249
OS03G0853200	LOC_Os03g63620	GO:0005886	C	plasma membrane	-3.49249
OS03G0853200	LOC_Os03g63620	GO:0008150	P	biological_process	-3.49249
OS03G0858800	LOC_Os03g64150	GO:0006810	P	transport	2.49271
OS03G0858800	LOC_Os03g64150	GO:0016020	C	membrane	2.49271
OS03G0858800	LOC_Os03g64150	GO:0009987	P	cellular process	2.49271
OS03G0858800	LOC_Os03g64150	GO:0005215	F	transporter activity	2.49271
OS04G0105700	LOC_Os04g01540	GO:0003674	F	molecular_function	1.76044
OS04G0105700	LOC_Os04g01540	GO:0008150	P	biological_process	1.76044
OS04G0105700	LOC_Os04g01540	GO:0009536	C	plastid	1.76044
OS04G0111350	None	None	None	None	-6.21807
OS04G0114950	None	None	None	None	-10.0578
OS04G0115200	LOC_Os04g02490	None	None	None	0.357942
OS04G0118100	LOC_Os04g02780	GO:0008152	P	metabolic process	1.54853
OS04G0118100	LOC_Os04g02780	GO:0009058	P	biosynthetic process	1.54853
OS04G0118100	LOC_Os04g02780	GO:0009987	P	cellular process	1.54853
OS04G0118100	LOC_Os04g02780	GO:0005829	C	cytosol	1.54853
OS04G0118100	LOC_Os04g02780	GO:0016787	F	hydrolase activity	1.54853
OS04G0118100	LOC_Os04g02780	GO:0005737	C	cytoplasm	1.54853
OS04G0160600	LOC_Os04g07830	GO:0016043	P	cellular component organization	-0.885016
OS04G0160600	LOC_Os04g07830	GO:0009987	P	cellular process	-0.885016
OS04G0160600	LOC_Os04g07830	GO:0005654	C	nucleoplasm	-0.885016
OS04G0185100	LOC_Os04g10650	GO:0005634	C	nucleus	-1.84225
OS04G0185100	LOC_Os04g10650	GO:0009058	P	biosynthetic process	-1.84225
OS04G0185100	LOC_Os04g10650	GO:0006259	P	DNA metabolic process	-1.84225
OS04G0185100	LOC_Os04g10650	GO:0006464	P	protein modification process	-1.84225
OS04G0185100	LOC_Os04g10650	GO:0016043	P	cellular component organization	-1.84225
OS04G0185100	LOC_Os04g10650	GO:0009987	P	cellular process	-1.84225
OS04G0185100	LOC_Os04g10650	GO:0005515	F	protein binding	-1.84225
OS04G0185100	LOC_Os04g10650	GO:0016301	F	kinase activity	-1.84225
OS04G0185100	LOC_Os04g10650	GO:0007049	P	cell cycle	-1.84225
OS04G0185100	LOC_Os04g10650	GO:0009536	C	plastid	-1.84225
OS04G0218350	None	None	None	None	-9.39928
OS04G0219000	None	None	None	None	-3.44162
OS04G0220501	LOC_Os04g14340	None	None	None	-9.98453
OS04G0234600	LOC_Os04g16680	GO:0005576	C	extracellular region	3.37789
OS04G0234600	LOC_Os04g16680	GO:0009058	P	biosynthetic process	3.37789
OS04G0234600	LOC_Os04g16680	GO:0005975	P	carbohydrate metabolic process	3.37789
OS04G0234600	LOC_Os04g16680	GO:0009987	P	cellular process	3.37789
OS04G0234600	LOC_Os04g16680	GO:0006950	P	response to stress	3.37789
OS04G0234600	LOC_Os04g16680	GO:0009607	P	response to biotic stimulus	3.37789
OS04G0234600	LOC_Os04g16680	GO:0016787	F	hydrolase activity	3.37789
OS04G0234600	LOC_Os04g16680	GO:0009579	C	thylakoid	3.37789
OS04G0234600	LOC_Os04g16680	GO:0005515	F	protein binding	3.37789
OS04G0234600	LOC_Os04g16680	GO:0015979	P	photosynthesis	3.37789
OS04G0234600	LOC_Os04g16680	GO:0009536	C	plastid	3.37789
OS04G0234600	LOC_Os04g16680	GO:0008152	P	metabolic process	3.37789
OS04G0269700	LOC_Os04g20180	None	None	None	-2.55324
OS04G0288100	LOC_Os04g22080	None	None	None	-9.96741
OS04G0290000	LOC_Os04g22270	None	None	None	-5.64665
OS04G0290450	None	None	None	None	-5.94594
OS04G0308400	LOC_Os04g24310	None	None	None	-6.84717
OS04G0308400	LOC_Os04g24319	None	None	None	-6.84717
OS04G0308500	LOC_Os04g24328	None	None	None	-5.47905
OS04G0310100	LOC_Os04g24469	None	None	None	-5.99595
OS04G0310200	LOC_Os04g24478	None	None	None	-5.78671
OS04G0325300	LOC_Os04g25900	GO:0005515	F	protein binding	11.6202
OS04G0325300	LOC_Os04g25900	GO:0006950	P	response to stress	11.6202
OS04G0325300	LOC_Os04g25900	GO:0000166	F	nucleotide binding	11.6202
OS04G0325300	LOC_Os04g25900	GO:0006950	P	response to stress	11.6202
OS04G0343050	None	None	None	None	4.60868
OS04G0363700	LOC_Os04g29424	None	None	None	2.5404
OS04G0367400	LOC_Os04g29920	GO:0003674	F	molecular_function	1.30571
OS04G0367400	LOC_Os04g29920	GO:0005783	C	endoplasmic reticulum	1.30571
OS04G0367400	LOC_Os04g29920	GO:0008150	P	biological_process	1.30571
OS04G0367800	None	None	None	None	9.1342
OS04G0370300	LOC_Os04g30180	GO:0005575	C	cellular_component	9.17054
OS04G0370300	LOC_Os04g30180	GO:0019538	P	protein metabolic process	9.17054
OS04G0370300	LOC_Os04g30180	GO:0009056	P	catabolic process	9.17054
OS04G0370300	LOC_Os04g30180	GO:0009987	P	cellular process	9.17054
OS04G0370300	LOC_Os04g30180	GO:0006464	P	protein modification process	9.17054
OS04G0370300	LOC_Os04g30180	GO:0003824	F	catalytic activity	9.17054
OS04G0384200	LOC_Os04g31524	None	None	None	3.16627
OS04G0429450	None	None	None	None	10.8095
OS04G0459500	LOC_Os04g38600	GO:0005975	P	carbohydrate metabolic process	5.78328
OS04G0459500	LOC_Os04g38600	GO:0009987	P	cellular process	5.78328
OS04G0459500	LOC_Os04g38600	GO:0016020	C	membrane	5.78328
OS04G0459500	LOC_Os04g38600	GO:0005576	C	extracellular region	5.78328
OS04G0459500	LOC_Os04g38600	GO:0006091	P	generation of precursor metabolites and energy	5.78328
OS04G0459500	LOC_Os04g38600	GO:0009056	P	catabolic process	5.78328
OS04G0459500	LOC_Os04g38600	GO:0000166	F	nucleotide binding	5.78328
OS04G0459500	LOC_Os04g38600	GO:0008152	P	metabolic process	5.78328
OS04G0459500	LOC_Os04g38600	GO:0009536	C	plastid	5.78328
OS04G0459500	LOC_Os04g38600	GO:0005975	P	carbohydrate metabolic process	5.78328
OS04G0459500	LOC_Os04g38600	GO:0009987	P	cellular process	5.78328
OS04G0459500	LOC_Os04g38600	GO:0016020	C	membrane	5.78328
OS04G0459500	LOC_Os04g38600	GO:0005576	C	extracellular region	5.78328
OS04G0459500	LOC_Os04g38600	GO:0006091	P	generation of precursor metabolites and energy	5.78328
OS04G0459500	LOC_Os04g38600	GO:0009056	P	catabolic process	5.78328
OS04G0459500	LOC_Os04g38600	GO:0000166	F	nucleotide binding	5.78328
OS04G0459500	LOC_Os04g38600	GO:0008152	P	metabolic process	5.78328
OS04G0459500	LOC_Os04g38600	GO:0009536	C	plastid	5.78328
OS04G0459500	LOC_Os04g38600	GO:0005975	P	carbohydrate metabolic process	5.78328
OS04G0459500	LOC_Os04g38600	GO:0009987	P	cellular process	5.78328
OS04G0459500	LOC_Os04g38600	GO:0016020	C	membrane	5.78328
OS04G0459500	LOC_Os04g38600	GO:0005576	C	extracellular region	5.78328
OS04G0459500	LOC_Os04g38600	GO:0006091	P	generation of precursor metabolites and energy	5.78328
OS04G0459500	LOC_Os04g38600	GO:0009056	P	catabolic process	5.78328
OS04G0459500	LOC_Os04g38600	GO:0000166	F	nucleotide binding	5.78328
OS04G0459500	LOC_Os04g38600	GO:0008152	P	metabolic process	5.78328
OS04G0459500	LOC_Os04g38600	GO:0009536	C	plastid	5.78328
OS04G0459500	LOC_Os04g38600	GO:0016020	C	membrane	5.78328
OS04G0459500	LOC_Os04g38600	GO:0005576	C	extracellular region	5.78328
OS04G0459500	LOC_Os04g38600	GO:0009536	C	plastid	5.78328
OS04G0459500	LOC_Os04g38600	GO:0009579	C	thylakoid	5.78328
OS04G0459500	LOC_Os04g38600	GO:0006950	P	response to stress	5.78328
OS04G0459500	LOC_Os04g38600	GO:0009628	P	response to abiotic stimulus	5.78328
OS04G0459500	LOC_Os04g38600	GO:0005975	P	carbohydrate metabolic process	5.78328
OS04G0459500	LOC_Os04g38600	GO:0006091	P	generation of precursor metabolites and energy	5.78328
OS04G0459500	LOC_Os04g38600	GO:0009056	P	catabolic process	5.78328
OS04G0459500	LOC_Os04g38600	GO:0008152	P	metabolic process	5.78328
OS04G0459500	LOC_Os04g38600	GO:0006464	P	protein modification process	5.78328
OS04G0459500	LOC_Os04g38600	GO:0008150	P	biological_process	5.78328
OS04G0459500	LOC_Os04g38600	GO:0005515	F	protein binding	5.78328
OS04G0459500	LOC_Os04g38600	GO:0009058	P	biosynthetic process	5.78328
OS04G0459500	LOC_Os04g38600	GO:0015979	P	photosynthesis	5.78328
OS04G0467000	LOC_Os04g39230	None	None	None	-2.27202
OS04G0554800	LOC_Os04g46830	GO:0005623	C	cell	4.38396
OS04G0554800	LOC_Os04g46830	GO:0008289	F	lipid binding	4.38396
OS04G0554800	LOC_Os04g46830	GO:0006810	P	transport	4.38396
OS04G0554800	LOC_Os04g46830	GO:0005623	C	cell	4.38396
OS04G0554800	LOC_Os04g46830	GO:0008289	F	lipid binding	4.38396
OS04G0554800	LOC_Os04g46830	GO:0006810	P	transport	4.38396
OS04G0598500	LOC_Os04g51009	None	None	None	6.80701
OS04G0602100	LOC_Os04g51300	GO:0005488	F	binding	2.51699
OS04G0602100	LOC_Os04g51300	GO:0016020	C	membrane	2.51699
OS04G0602100	LOC_Os04g51300	GO:0009536	C	plastid	2.51699
OS04G0602100	LOC_Os04g51300	GO:0009579	C	thylakoid	2.51699
OS04G0602100	LOC_Os04g51300	GO:0005634	C	nucleus	2.51699
OS04G0602100	LOC_Os04g51300	GO:0008152	P	metabolic process	2.51699
OS04G0602100	LOC_Os04g51300	GO:0005737	C	cytoplasm	2.51699
OS04G0602100	LOC_Os04g51300	GO:0006950	P	response to stress	2.51699
OS04G0602100	LOC_Os04g51300	GO:0005515	F	protein binding	2.51699
OS04G0602100	LOC_Os04g51300	GO:0003824	F	catalytic activity	2.51699
OS04G0613600	LOC_Os04g52361	GO:0016020	C	membrane	-2.87315
OS04G0613600	LOC_Os04g52361	GO:0006412	P	translation	-2.87315
OS04G0613600	LOC_Os04g52361	GO:0005840	C	ribosome	-2.87315
OS04G0613600	LOC_Os04g52361	GO:0005829	C	cytosol	-2.87315
OS04G0613600	LOC_Os04g52361	GO:0005198	F	structural molecule activity	-2.87315
OS04G0619000	LOC_Os04g52810	GO:0000003	P	reproduction	2.39974
OS04G0619000	LOC_Os04g52810	GO:0009653	P	anatomical structure morphogenesis	2.39974
OS04G0619000	LOC_Os04g52810	GO:0009791	P	post-embryonic development	2.39974
OS04G0619000	LOC_Os04g52810	GO:0009790	P	embryo development	2.39974
OS04G0619000	LOC_Os04g52810	GO:0009058	P	biosynthetic process	2.39974
OS04G0619000	LOC_Os04g52810	GO:0006139	P	nucleobase, nucleoside, nucleotide and nucleic acid metabolic process	2.39974
OS04G0619000	LOC_Os04g52810	GO:0007275	P	multicellular organismal development	2.39974
OS04G0619000	LOC_Os04g52810	GO:0009719	P	response to endogenous stimulus	2.39974
OS04G0619000	LOC_Os04g52810	GO:0007165	P	signal transduction	2.39974
OS04G0619000	LOC_Os04g52810	GO:0003700	F	sequence-specific DNA binding transcription factor activity	2.39974
OS04G0626450	LOC_Os04g53496	GO:0005515	F	protein binding	-4.52384
OS04G0626450	LOC_Os04g53496	GO:0006950	P	response to stress	-4.52384
OS04G0629300	LOC_Os04g53720	None	None	None	2.45431
OS04G0639700	LOC_Os04g54670	None	None	None	-5.53008
OS04G0639800	LOC_Os04g54680	None	None	None	-5.34987
OS04G0658300	LOC_Os04g56320	GO:0016020	C	membrane	1.65695
OS04G0658300	LOC_Os04g56320	GO:0009536	C	plastid	1.65695
OS04G0658300	LOC_Os04g56320	GO:0009579	C	thylakoid	1.65695
OS04G0658300	LOC_Os04g56320	GO:0000166	F	nucleotide binding	1.65695
OS04G0658300	LOC_Os04g56320	GO:0009056	P	catabolic process	1.65695
OS04G0658300	LOC_Os04g56320	GO:0006139	P	nucleobase, nucleoside, nucleotide and nucleic acid metabolic process	1.65695
OS04G0658300	LOC_Os04g56320	GO:0016787	F	hydrolase activity	1.65695
OS04G0659200	LOC_Os04g56420	None	None	None	3.44947
OS04G0664600	LOC_Os04g56910	GO:0016740	F	transferase activity	-1.77495
OS04G0664600	LOC_Os04g56910	GO:0008152	P	metabolic process	-1.77495
OS04G0664600	LOC_Os04g56910	GO:0009058	P	biosynthetic process	-1.77495
OS04G0664600	LOC_Os04g56910	GO:0009987	P	cellular process	-1.77495
OS04G0664600	LOC_Os04g56910	GO:0019748	P	secondary metabolic process	-1.77495
OS04G0664600	LOC_Os04g56910	GO:0005829	C	cytosol	-1.77495
OS04G0664600	LOC_Os04g56910	GO:0008150	P	biological_process	-1.77495
OS04G0672300	LOC_Os04g57650	GO:0005575	C	cellular_component	-0.919049
OS04G0684100	LOC_Os04g58734	None	None	None	2.10316
OS04G0691600	LOC_Os04g59494	GO:0005634	C	nucleus	1.30742
OS04G0691600	LOC_Os04g59494	GO:0016020	C	membrane	1.30742
OS04G0691600	LOC_Os04g59494	GO:0005635	C	nuclear envelope	1.30742
OS04G0691600	LOC_Os04g59494	GO:0005215	F	transporter activity	1.30742
OS04G0691600	LOC_Os04g59494	GO:0006810	P	transport	1.30742
OS04G0691600	LOC_Os04g59494	GO:0009987	P	cellular process	1.30742
OS04G0691600	LOC_Os04g59494	GO:0005737	C	cytoplasm	1.30742
OS04G0691600	LOC_Os04g59494	GO:0005515	F	protein binding	1.30742
OS04G0691600	LOC_Os04g59494	GO:0005829	C	cytosol	1.30742
OS04G0691600	LOC_Os04g59494	GO:0016043	P	cellular component organization	1.30742
OS04G0691600	LOC_Os04g59494	GO:0005634	C	nucleus	1.30742
OS04G0691600	LOC_Os04g59494	GO:0016020	C	membrane	1.30742
OS04G0691600	LOC_Os04g59494	GO:0005635	C	nuclear envelope	1.30742
OS04G0691600	LOC_Os04g59494	GO:0005215	F	transporter activity	1.30742
OS04G0691600	LOC_Os04g59494	GO:0006810	P	transport	1.30742
OS04G0691600	LOC_Os04g59494	GO:0009987	P	cellular process	1.30742
OS04G0691600	LOC_Os04g59494	GO:0005737	C	cytoplasm	1.30742
OS04G0691600	LOC_Os04g59494	GO:0005515	F	protein binding	1.30742
OS04G0691600	LOC_Os04g59494	GO:0005829	C	cytosol	1.30742
OS04G0691600	LOC_Os04g59494	GO:0016043	P	cellular component organization	1.30742
OS04G0691600	LOC_Os04g59494	GO:0005634	C	nucleus	1.30742
OS04G0691600	LOC_Os04g59494	GO:0016020	C	membrane	1.30742
OS04G0691600	LOC_Os04g59494	GO:0005635	C	nuclear envelope	1.30742
OS04G0691600	LOC_Os04g59494	GO:0005215	F	transporter activity	1.30742
OS04G0691600	LOC_Os04g59494	GO:0006810	P	transport	1.30742
OS04G0691600	LOC_Os04g59494	GO:0009987	P	cellular process	1.30742
OS04G0691600	LOC_Os04g59494	GO:0005737	C	cytoplasm	1.30742
OS04G0691600	LOC_Os04g59494	GO:0005515	F	protein binding	1.30742
OS04G0691600	LOC_Os04g59494	GO:0005829	C	cytosol	1.30742
OS04G0691600	LOC_Os04g59494	GO:0016043	P	cellular component organization	1.30742
OS05G0110300	LOC_Os05g01970	GO:0005576	C	extracellular region	1.37813
OS05G0110300	LOC_Os05g01970	GO:0005488	F	binding	1.37813
OS05G0110300	LOC_Os05g01970	GO:0006950	P	response to stress	1.37813
OS05G0110300	LOC_Os05g01970	GO:0009607	P	response to biotic stimulus	1.37813
OS05G0110300	LOC_Os05g01970	GO:0009579	C	thylakoid	1.37813
OS05G0110300	LOC_Os05g01970	GO:0009536	C	plastid	1.37813
OS05G0110300	LOC_Os05g01970	GO:0005576	C	extracellular region	1.37813
OS05G0110300	LOC_Os05g01970	GO:0005488	F	binding	1.37813
OS05G0110300	LOC_Os05g01970	GO:0006950	P	response to stress	1.37813
OS05G0110300	LOC_Os05g01970	GO:0009607	P	response to biotic stimulus	1.37813
OS05G0110300	LOC_Os05g01970	GO:0009579	C	thylakoid	1.37813
OS05G0110300	LOC_Os05g01970	GO:0009536	C	plastid	1.37813
OS05G0110300	LOC_Os05g01970	GO:0005576	C	extracellular region	1.37813
OS05G0110300	LOC_Os05g01970	GO:0005488	F	binding	1.37813
OS05G0110300	LOC_Os05g01970	GO:0006950	P	response to stress	1.37813
OS05G0110300	LOC_Os05g01970	GO:0009607	P	response to biotic stimulus	1.37813
OS05G0110300	LOC_Os05g01970	GO:0009579	C	thylakoid	1.37813
OS05G0110300	LOC_Os05g01970	GO:0009536	C	plastid	1.37813
OS05G0110300	LOC_Os05g01970	GO:0005576	C	extracellular region	1.37813
OS05G0110300	LOC_Os05g01970	GO:0005488	F	binding	1.37813
OS05G0110300	LOC_Os05g01970	GO:0006950	P	response to stress	1.37813
OS05G0110300	LOC_Os05g01970	GO:0009607	P	response to biotic stimulus	1.37813
OS05G0110300	LOC_Os05g01970	GO:0009579	C	thylakoid	1.37813
OS05G0110300	LOC_Os05g01970	GO:0009536	C	plastid	1.37813
OS05G0110300	LOC_Os05g01970	GO:0005576	C	extracellular region	1.37813
OS05G0110300	LOC_Os05g01970	GO:0005488	F	binding	1.37813
OS05G0110300	LOC_Os05g01970	GO:0006950	P	response to stress	1.37813
OS05G0110300	LOC_Os05g01970	GO:0009607	P	response to biotic stimulus	1.37813
OS05G0110300	LOC_Os05g01970	GO:0009579	C	thylakoid	1.37813
OS05G0110300	LOC_Os05g01970	GO:0009536	C	plastid	1.37813
OS05G0124600	LOC_Os05g03390	None	None	None	-3.12458
OS05G0147100	LOC_Os05g05440	GO:0003674	F	molecular_function	1.5934
OS05G0147100	LOC_Os05g05440	GO:0005622	C	intracellular	1.5934
OS05G0147100	LOC_Os05g05440	GO:0008150	P	biological_process	1.5934
OS05G0161500	LOC_Os05g06920	GO:0008152	P	metabolic process	-3.23721
OS05G0161500	LOC_Os05g06920	GO:0006139	P	nucleobase, nucleoside, nucleotide and nucleic acid metabolic process	-3.23721
OS05G0161500	LOC_Os05g06920	GO:0005488	F	binding	-3.23721
OS05G0161500	LOC_Os05g06920	GO:0016740	F	transferase activity	-3.23721
OS05G0161500	LOC_Os05g06920	GO:0009536	C	plastid	-3.23721
OS05G0186000	LOC_Os05g09400	GO:0005840	C	ribosome	1.06122
OS05G0186000	LOC_Os05g09400	GO:0006412	P	translation	1.06122
OS05G0186000	LOC_Os05g09400	GO:0005198	F	structural molecule activity	1.06122
OS05G0186000	LOC_Os05g09400	GO:0009536	C	plastid	1.06122
OS05G0186000	LOC_Os05g09400	GO:0005840	C	ribosome	1.06122
OS05G0186000	LOC_Os05g09400	GO:0006412	P	translation	1.06122
OS05G0186000	LOC_Os05g09400	GO:0005198	F	structural molecule activity	1.06122
OS05G0186000	LOC_Os05g09400	GO:0009536	C	plastid	1.06122
OS05G0186000	LOC_Os05g09400	GO:0005840	C	ribosome	1.06122
OS05G0186000	LOC_Os05g09400	GO:0006412	P	translation	1.06122
OS05G0186000	LOC_Os05g09400	GO:0005198	F	structural molecule activity	1.06122
OS05G0186000	LOC_Os05g09400	GO:0009536	C	plastid	1.06122
OS05G0202550	None	None	None	None	-4.18329
OS05G0202800	LOC_Os05g11320	GO:0005575	C	cellular_component	3.25265
OS05G0202800	LOC_Os05g11320	GO:0019725	P	cellular homeostasis	3.25265
OS05G0202800	LOC_Os05g11320	GO:0005488	F	binding	3.25265
OS05G0273800	LOC_Os05g19150	GO:0008152	P	metabolic process	-1.43424
OS05G0273800	LOC_Os05g19150	GO:0016787	F	hydrolase activity	-1.43424
OS05G0273800	LOC_Os05g19150	GO:0003824	F	catalytic activity	-1.43424
OS05G0273800	LOC_Os05g19150	GO:0005777	C	peroxisome	-1.43424
OS05G0369300	LOC_Os05g30640	GO:0005737	C	cytoplasm	-11.9975
OS05G0369300	LOC_Os05g30640	GO:0006810	P	transport	-11.9975
OS05G0369300	LOC_Os05g30640	GO:0009987	P	cellular process	-11.9975
OS05G0369800	LOC_Os05g30695	None	None	None	-6.37971
OS05G0369900	LOC_Os05g30700	None	None	None	-5.05376
OS05G0372300	LOC_Os05g30890	GO:0005623	C	cell	-4.37389
OS05G0372300	LOC_Os05g30890	GO:0003674	F	molecular_function	-4.37389
OS05G0372300	LOC_Os05g30890	GO:0005488	F	binding	-4.37389
OS05G0372300	LOC_Os05g30890	GO:0003824	F	catalytic activity	-4.37389
OS05G0372300	LOC_Os05g30890	GO:0008152	P	metabolic process	-4.37389
OS05G0372300	LOC_Os05g30890	GO:0019825	F	oxygen binding	-4.37389
OS05G0380200	None	None	None	None	-5.58728
OS05G0380250	None	None	None	None	-7.45859
OS05G0382550	LOC_Os05g31744	None	None	None	-7.83043
OS05G0390800	LOC_Os05g32460	GO:0005515	F	protein binding	-1.92229
OS05G0390800	LOC_Os05g32460	GO:0008150	P	biological_process	-1.92229
OS05G0390800	LOC_Os05g32460	GO:0005488	F	binding	-1.92229
OS05G0390800	LOC_Os05g32460	GO:0009536	C	plastid	-1.92229
OS05G0392900	LOC_Os05g32640	None	None	None	5.97499
OS05G0415400	LOC_Os05g34310	GO:0005575	C	cellular_component	2.58308
OS05G0415400	LOC_Os05g34310	GO:0009058	P	biosynthetic process	2.58308
OS05G0415400	LOC_Os05g34310	GO:0006139	P	nucleobase, nucleoside, nucleotide and nucleic acid metabolic process	2.58308
OS05G0415400	LOC_Os05g34310	GO:0007275	P	multicellular organismal development	2.58308
OS05G0415400	LOC_Os05g34310	GO:0003700	F	sequence-specific DNA binding transcription factor activity	2.58308
OS05G0523100	LOC_Os05g44786	None	None	None	-2.60364
OS05G0523100	LOC_Os05g44792	GO:0003677	F	DNA binding	-2.60364
OS05G0523100	LOC_Os05g44792	GO:0005634	C	nucleus	-2.60364
OS05G0523100	LOC_Os05g44792	GO:0009058	P	biosynthetic process	-2.60364
OS05G0523100	LOC_Os05g44792	GO:0006259	P	DNA metabolic process	-2.60364
OS05G0523100	LOC_Os05g44792	GO:0005488	F	binding	-2.60364
OS05G0523100	LOC_Os05g44792	GO:0003676	F	nucleic acid binding	-2.60364
OS05G0547800	LOC_Os05g47442	None	None	None	-7.01818
OS05G0560000	LOC_Os05g48630	GO:0016020	C	membrane	3.96815
OS05G0560000	LOC_Os05g48630	GO:0009536	C	plastid	3.96815
OS05G0560000	LOC_Os05g48630	GO:0009579	C	thylakoid	3.96815
OS05G0560000	LOC_Os05g48630	GO:0003674	F	molecular_function	3.96815
OS05G0560000	LOC_Os05g48630	GO:0015979	P	photosynthesis	3.96815
OS05G0561800	LOC_Os05g48770	None	None	None	-8.05164
OS05G0573200	LOC_Os05g49760	GO:0005576	C	extracellular region	-5.52612
OS05G0573200	LOC_Os05g49760	GO:0006139	P	nucleobase, nucleoside, nucleotide and nucleic acid metabolic process	-5.52612
OS05G0573200	LOC_Os05g49760	GO:0008152	P	metabolic process	-5.52612
OS05G0573200	LOC_Os05g49760	GO:0005575	C	cellular_component	-5.52612
OS05G0573200	LOC_Os05g49760	GO:0006950	P	response to stress	-5.52612
OS05G0573200	LOC_Os05g49760	GO:0009607	P	response to biotic stimulus	-5.52612
OS05G0573200	LOC_Os05g49760	GO:0008150	P	biological_process	-5.52612
OS05G0573200	LOC_Os05g49760	GO:0003824	F	catalytic activity	-5.52612
OS05G0573200	LOC_Os05g49760	GO:0005515	F	protein binding	-5.52612
OS05G0573200	LOC_Os05g49760	GO:0005829	C	cytosol	-5.52612
OS05G0573200	LOC_Os05g49760	GO:0005488	F	binding	-5.52612
OS05G0573200	LOC_Os05g49760	GO:0009987	P	cellular process	-5.52612
OS05G0573200	LOC_Os05g49760	GO:0009628	P	response to abiotic stimulus	-5.52612
OS05G0573200	LOC_Os05g49760	GO:0005886	C	plasma membrane	-5.52612
OS05G0580200	LOC_Os05g50390	None	None	None	-4.19524
OS05G0580550	LOC_Os05g50420	None	None	None	-8.95286
OS05G0581000	None	None	None	None	7.71472
OS06G0101600	LOC_Os06g01210	GO:0008150	P	biological_process	2.93499
OS06G0101600	LOC_Os06g01210	GO:0003674	F	molecular_function	2.93499
OS06G0101600	LOC_Os06g01210	GO:0009628	P	response to abiotic stimulus	2.93499
OS06G0101600	LOC_Os06g01210	GO:0009579	C	thylakoid	2.93499
OS06G0101600	LOC_Os06g01210	GO:0006412	P	translation	2.93499
OS06G0101600	LOC_Os06g01210	GO:0009536	C	plastid	2.93499
OS06G0101600	LOC_Os06g01210	GO:0005488	F	binding	2.93499
OS06G0118600	LOC_Os06g02770	None	None	None	-7.30355
OS06G0122600	LOC_Os06g03180	None	None	None	-3.98095
OS06G0151100	LOC_Os06g05790	GO:0008152	P	metabolic process	1.33628
OS06G0151100	LOC_Os06g05790	GO:0003824	F	catalytic activity	1.33628
OS06G0151100	LOC_Os06g05790	GO:0005488	F	binding	1.33628
OS06G0151100	LOC_Os06g05790	GO:0016740	F	transferase activity	1.33628
OS06G0151100	LOC_Os06g05790	GO:0009536	C	plastid	1.33628
OS06G0152800	LOC_Os06g05950	GO:0003674	F	molecular_function	2.35133
OS06G0152800	LOC_Os06g05950	GO:0005575	C	cellular_component	2.35133
OS06G0152800	LOC_Os06g05950	GO:0008150	P	biological_process	2.35133
OS06G0152800	LOC_Os06g05950	GO:0003674	F	molecular_function	2.35133
OS06G0152800	LOC_Os06g05950	GO:0005575	C	cellular_component	2.35133
OS06G0152800	LOC_Os06g05950	GO:0008150	P	biological_process	2.35133
OS06G0152800	LOC_Os06g05950	GO:0003674	F	molecular_function	2.35133
OS06G0152800	LOC_Os06g05950	GO:0005575	C	cellular_component	2.35133
OS06G0152800	LOC_Os06g05950	GO:0008150	P	biological_process	2.35133
OS06G0163900	LOC_Os06g06860	GO:0005575	C	cellular_component	-3.1342
OS06G0163900	LOC_Os06g06860	GO:0000166	F	nucleotide binding	-3.1342
OS06G0163900	LOC_Os06g06860	GO:0006950	P	response to stress	-3.1342
OS06G0274300	LOC_Os06g16300	GO:0008152	P	metabolic process	0.124403
OS06G0274300	LOC_Os06g16300	GO:0009987	P	cellular process	0.124403
OS06G0274300	LOC_Os06g16300	GO:0005515	F	protein binding	0.124403
OS06G0274300	LOC_Os06g16300	GO:0016301	F	kinase activity	0.124403
OS06G0274300	LOC_Os06g16300	GO:0006950	P	response to stress	0.124403
OS06G0274300	LOC_Os06g16300	GO:0009607	P	response to biotic stimulus	0.124403
OS06G0274300	LOC_Os06g16300	GO:0005886	C	plasma membrane	0.124403
OS06G0274300	LOC_Os06g16300	GO:0008152	P	metabolic process	0.124403
OS06G0274300	LOC_Os06g16300	GO:0009987	P	cellular process	0.124403
OS06G0274300	LOC_Os06g16300	GO:0005515	F	protein binding	0.124403
OS06G0274300	LOC_Os06g16300	GO:0016301	F	kinase activity	0.124403
OS06G0274300	LOC_Os06g16300	GO:0006950	P	response to stress	0.124403
OS06G0274300	LOC_Os06g16300	GO:0009607	P	response to biotic stimulus	0.124403
OS06G0274300	LOC_Os06g16300	GO:0005886	C	plasma membrane	0.124403
OS06G0295900	LOC_Os06g19200	None	None	None	3.63711
OS06G0310801	None	None	None	None	-2.3403
OS06G0332800	LOC_Os06g22690	GO:0019538	P	protein metabolic process	1.18394
OS06G0332800	LOC_Os06g22690	GO:0009987	P	cellular process	1.18394
OS06G0332800	LOC_Os06g22690	GO:0005515	F	protein binding	1.18394
OS06G0332800	LOC_Os06g22690	GO:0009536	C	plastid	1.18394
OS06G0354600	LOC_Os06g24711	None	None	None	-6.9987
OS06G0361750	LOC_Os06g25605	None	None	None	-1.19791
OS06G0363000	LOC_Os06g25770	None	None	None	-5.88522
OS06G0498000	LOC_Os06g30250	None	None	None	-1.12086
OS06G0534800	LOC_Os06g34390	GO:0005623	C	cell	2.57356
OS06G0534800	LOC_Os06g34390	GO:0005488	F	binding	2.57356
OS06G0553200	LOC_Os06g35970	GO:0005576	C	extracellular region	1.87794
OS06G0553200	LOC_Os06g35970	GO:0005576	C	extracellular region	1.87794
OS06G0601500	LOC_Os06g39960	GO:0007165	P	signal transduction	-2.76884
OS06G0601500	LOC_Os06g39960	GO:0009628	P	response to abiotic stimulus	-2.76884
OS06G0601500	LOC_Os06g39960	GO:0003677	F	DNA binding	-2.76884
OS06G0601500	LOC_Os06g39960	GO:0009058	P	biosynthetic process	-2.76884
OS06G0601500	LOC_Os06g39960	GO:0006139	P	nucleobase, nucleoside, nucleotide and nucleic acid metabolic process	-2.76884
OS06G0601500	LOC_Os06g39960	GO:0009791	P	post-embryonic development	-2.76884
OS06G0601500	LOC_Os06g39960	GO:0005515	F	protein binding	-2.76884
OS06G0601500	LOC_Os06g39960	GO:0009987	P	cellular process	-2.76884
OS06G0601500	LOC_Os06g39960	GO:0019748	P	secondary metabolic process	-2.76884
OS06G0601500	LOC_Os06g39960	GO:0003700	F	sequence-specific DNA binding transcription factor activity	-2.76884
OS06G0601500	LOC_Os06g39960	GO:0009719	P	response to endogenous stimulus	-2.76884
OS06G0601500	LOC_Os06g39960	GO:0005634	C	nucleus	-2.76884
OS06G0601500	LOC_Os06g39960	GO:0008150	P	biological_process	-2.76884
OS06G0699050	None	None	None	None	-4.55959
OS06G0699800	LOC_Os06g48630	GO:0005515	F	protein binding	-3.23056
OS06G0699800	LOC_Os06g48630	GO:0006810	P	transport	-3.23056
OS06G0699800	LOC_Os06g48630	GO:0016043	P	cellular component organization	-3.23056
OS06G0699800	LOC_Os06g48630	GO:0009987	P	cellular process	-3.23056
OS06G0699800	LOC_Os06g48630	GO:0009058	P	biosynthetic process	-3.23056
OS06G0699800	LOC_Os06g48630	GO:0006464	P	protein modification process	-3.23056
OS06G0699800	LOC_Os06g48630	GO:0008289	F	lipid binding	-3.23056
OS06G0699800	LOC_Os06g48630	GO:0005488	F	binding	-3.23056
OS07G0110650	None	None	None	None	-7.01065
OS07G0111600	LOC_Os07g02090	GO:0005488	F	binding	0.556924
OS07G0111600	LOC_Os07g02090	GO:0008152	P	metabolic process	0.556924
OS07G0111600	LOC_Os07g02090	GO:0016787	F	hydrolase activity	0.556924
OS07G0111600	LOC_Os07g02090	GO:0009987	P	cellular process	0.556924
OS07G0111600	LOC_Os07g02090	GO:0008150	P	biological_process	0.556924
OS07G0111600	LOC_Os07g02090	GO:0009536	C	plastid	0.556924
OS07G0111700	LOC_Os07g02100	GO:0000166	F	nucleotide binding	-0.652079
OS07G0111700	LOC_Os07g02100	GO:0005575	C	cellular_component	-0.652079
OS07G0111700	LOC_Os07g02100	GO:0005488	F	binding	-0.652079
OS07G0111700	LOC_Os07g02100	GO:0003824	F	catalytic activity	-0.652079
OS07G0111700	LOC_Os07g02100	GO:0008152	P	metabolic process	-0.652079
OS07G0111700	LOC_Os07g02100	GO:0000166	F	nucleotide binding	-0.652079
OS07G0111700	LOC_Os07g02100	GO:0005575	C	cellular_component	-0.652079
OS07G0111700	LOC_Os07g02100	GO:0005488	F	binding	-0.652079
OS07G0111700	LOC_Os07g02100	GO:0003824	F	catalytic activity	-0.652079
OS07G0111700	LOC_Os07g02100	GO:0008152	P	metabolic process	-0.652079
OS07G0116900	LOC_Os07g02570	GO:0000166	F	nucleotide binding	-1.70086
OS07G0116900	LOC_Os07g02570	GO:0006950	P	response to stress	-1.70086
OS07G0116900	LOC_Os07g02580	GO:0006091	P	generation of precursor metabolites and energy	-1.70086
OS07G0116900	LOC_Os07g02580	GO:0016020	C	membrane	-1.70086
OS07G0116900	LOC_Os07g02580	GO:0005739	C	mitochondrion	-1.70086
OS07G0116900	LOC_Os07g02580	GO:0005488	F	binding	-1.70086
OS07G0116900	LOC_Os07g02580	GO:0008152	P	metabolic process	-1.70086
OS07G0116900	LOC_Os07g02580	GO:0003824	F	catalytic activity	-1.70086
OS07G0117400	LOC_Os07g02630	GO:0005515	F	protein binding	-9.02954
OS07G0117400	LOC_Os07g02630	GO:0006950	P	response to stress	-9.02954
OS07G0117400	LOC_Os07g02630	GO:0005515	F	protein binding	-9.02954
OS07G0117400	LOC_Os07g02630	GO:0006950	P	response to stress	-9.02954
OS07G0118200	LOC_Os07g02690	GO:0005576	C	extracellular region	-2.89981
OS07G0118200	LOC_Os07g02690	GO:0005515	F	protein binding	-2.89981
OS07G0118200	LOC_Os07g02690	GO:0008150	P	biological_process	-2.89981
OS07G0119600	LOC_Os07g02820	None	None	None	-7.38455
OS07G0121500	None	None	None	None	-4.46742
OS07G0121800	LOC_Os07g03030	None	None	None	-5.70666
OS07G0122000	LOC_Os07g03040	None	None	None	4.42278
OS07G0122100	LOC_Os07g03040	None	None	None	4.46564
OS07G0129100	None	None	None	None	-9.57629
OS07G0130100	LOC_Os07g03810	GO:0008150	P	biological_process	1.22899
OS07G0130100	LOC_Os07g03810	GO:0008152	P	metabolic process	1.22899
OS07G0130100	LOC_Os07g03810	GO:0009987	P	cellular process	1.22899
OS07G0130100	LOC_Os07g03810	GO:0016301	F	kinase activity	1.22899
OS07G0130100	LOC_Os07g03810	GO:0005886	C	plasma membrane	1.22899
OS07G0136500	LOC_Os07g04350	None	None	None	-5.6967
OS07G0137600	LOC_Os07g04500	None	None	None	-6.26907
OS07G0140232	LOC_Os07g04730	GO:0005623	C	cell	-6.51523
OS07G0140232	LOC_Os07g04730	GO:0003674	F	molecular_function	-6.51523
OS07G0140232	LOC_Os07g04730	GO:0009607	P	response to biotic stimulus	-6.51523
OS07G0140566	None	None	None	None	10.0759
OS07G0140633	None	None	None	None	9.06891
OS07G0141400	LOC_Os07g04840	GO:0005576	C	extracellular region	3.85085
OS07G0141400	LOC_Os07g04840	GO:0016020	C	membrane	3.85085
OS07G0141400	LOC_Os07g04840	GO:0009579	C	thylakoid	3.85085
OS07G0141400	LOC_Os07g04840	GO:0009536	C	plastid	3.85085
OS07G0141400	LOC_Os07g04840	GO:0006950	P	response to stress	3.85085
OS07G0141400	LOC_Os07g04840	GO:0009607	P	response to biotic stimulus	3.85085
OS07G0141400	LOC_Os07g04840	GO:0006091	P	generation of precursor metabolites and energy	3.85085
OS07G0141400	LOC_Os07g04840	GO:0015979	P	photosynthesis	3.85085
OS07G0141400	LOC_Os07g04840	GO:0005515	F	protein binding	3.85085
OS07G0141400	LOC_Os07g04840	GO:0003723	F	RNA binding	3.85085
OS07G0144732	LOC_Os07g05145	None	None	None	6.90088
OS07G0151650	None	None	None	None	-5.62135
OS07G0151700	LOC_Os07g05690	None	None	None	-5.06806
OS07G0180800	LOC_Os07g08320	GO:0003723	F	RNA binding	-1.02081
OS07G0180800	LOC_Os07g08320	GO:0000166	F	nucleotide binding	-1.02081
OS07G0180800	LOC_Os07g08320	GO:0003676	F	nucleic acid binding	-1.02081
OS07G0190900	LOC_Os07g09320	GO:0003674	F	molecular_function	1.55487
OS07G0190900	LOC_Os07g09320	GO:0005575	C	cellular_component	1.55487
OS07G0190900	LOC_Os07g09320	GO:0000003	P	reproduction	1.55487
OS07G0190900	LOC_Os07g09320	GO:0009791	P	post-embryonic development	1.55487
OS07G0190900	LOC_Os07g09320	GO:0009790	P	embryo development	1.55487
OS07G0219250	LOC_Os07g11900	None	None	None	10.8963
OS07G0219300	LOC_Os07g11910	None	None	None	10.3742
OS07G0219400	LOC_Os07g11920	None	None	None	10.5107
OS07G0220000	None	None	None	None	11.9717
OS07G0228300	None	None	None	None	-3.70725
OS07G0256866	None	None	None	None	-7.0591
OS07G0290200	LOC_Os07g18990	GO:0007165	P	signal transduction	2.87209
OS07G0290200	LOC_Os07g18990	GO:0006950	P	response to stress	2.87209
OS07G0290200	LOC_Os07g18990	GO:0009607	P	response to biotic stimulus	2.87209
OS07G0290200	LOC_Os07g18990	GO:0006810	P	transport	2.87209
OS07G0290200	LOC_Os07g18990	GO:0008289	F	lipid binding	2.87209
OS07G0290200	LOC_Os07g18990	GO:0005215	F	transporter activity	2.87209
OS07G0290200	LOC_Os07g18990	GO:0005623	C	cell	2.87209
OS07G0290200	LOC_Os07g18990	GO:0005488	F	binding	2.87209
OS07G0422000	LOC_Os07g23990	GO:0005488	F	binding	1.05513
OS07G0422000	LOC_Os07g23990	GO:0005488	F	binding	1.05513
OS07G0435300	LOC_Os07g25430	GO:0009536	C	plastid	3.51921
OS07G0435300	LOC_Os07g25430	GO:0016020	C	membrane	3.51921
OS07G0435300	LOC_Os07g25430	GO:0009579	C	thylakoid	3.51921
OS07G0435300	LOC_Os07g25430	GO:0003824	F	catalytic activity	3.51921
OS07G0435300	LOC_Os07g25430	GO:0015979	P	photosynthesis	3.51921
OS07G0442000	LOC_Os07g26000	GO:0003674	F	molecular_function	-6.887
OS07G0442000	LOC_Os07g26000	GO:0005575	C	cellular_component	-6.887
OS07G0442000	LOC_Os07g26000	GO:0008150	P	biological_process	-6.887
OS07G0442800	LOC_Os07g26100	None	None	None	0.657241
OS07G0469200	LOC_Os07g28614	GO:0005623	C	cell	2.90437
OS07G0469200	LOC_Os07g28614	GO:0003674	F	molecular_function	2.90437
OS07G0469200	LOC_Os07g28614	GO:0006091	P	generation of precursor metabolites and energy	2.90437
OS07G0472300	LOC_Os07g28920	GO:0003674	F	molecular_function	-1.49923
OS07G0472300	LOC_Os07g28920	GO:0008150	P	biological_process	-1.49923
OS07G0492100	LOC_Os07g30980	None	None	None	-2.65709
OS07G0504601	LOC_Os07g32129	None	None	None	-5.92015
OS07G0523100	LOC_Os07g33860	GO:0005840	C	ribosome	-1.86247
OS07G0523100	LOC_Os07g33860	GO:0005829	C	cytosol	-1.86247
OS07G0523100	LOC_Os07g33860	GO:0006412	P	translation	-1.86247
OS07G0523100	LOC_Os07g33860	GO:0005198	F	structural molecule activity	-1.86247
OS07G0539100	LOC_Os07g35480	GO:0005488	F	binding	2.57214
OS07G0539100	LOC_Os07g35480	GO:0016787	F	hydrolase activity	2.57214
OS07G0539100	LOC_Os07g35480	GO:0008152	P	metabolic process	2.57214
OS07G0539100	LOC_Os07g35480	GO:0005975	P	carbohydrate metabolic process	2.57214
OS07G0539100	LOC_Os07g35480	GO:0003824	F	catalytic activity	2.57214
OS07G0539100	LOC_Os07g35480	GO:0005488	F	binding	2.57214
OS07G0539100	LOC_Os07g35480	GO:0016787	F	hydrolase activity	2.57214
OS07G0539100	LOC_Os07g35480	GO:0008152	P	metabolic process	2.57214
OS07G0539100	LOC_Os07g35480	GO:0005975	P	carbohydrate metabolic process	2.57214
OS07G0539100	LOC_Os07g35480	GO:0003824	F	catalytic activity	2.57214
OS07G0539100	LOC_Os07g35480	GO:0005488	F	binding	2.57214
OS07G0539100	LOC_Os07g35480	GO:0016787	F	hydrolase activity	2.57214
OS07G0539100	LOC_Os07g35480	GO:0008152	P	metabolic process	2.57214
OS07G0539100	LOC_Os07g35480	GO:0005975	P	carbohydrate metabolic process	2.57214
OS07G0539100	LOC_Os07g35480	GO:0003824	F	catalytic activity	2.57214
OS07G0545500	LOC_Os07g36150	GO:0005515	F	protein binding	-0.769326
OS07G0545500	LOC_Os07g36150	GO:0005737	C	cytoplasm	-0.769326
OS07G0545500	LOC_Os07g36150	GO:0005618	C	cell wall	-0.769326
OS07G0545500	LOC_Os07g36150	GO:0000003	P	reproduction	-0.769326
OS07G0545500	LOC_Os07g36150	GO:0009653	P	anatomical structure morphogenesis	-0.769326
OS07G0545500	LOC_Os07g36150	GO:0009791	P	post-embryonic development	-0.769326
OS07G0545500	LOC_Os07g36150	GO:0016043	P	cellular component organization	-0.769326
OS07G0545500	LOC_Os07g36150	GO:0009987	P	cellular process	-0.769326
OS07G0565000	None	None	None	None	-1.82458
OS07G0608450	None	None	None	None	-1.03832
OS07G0642100	LOC_Os07g44770	None	None	None	7.54878
OS07G0654900	LOC_Os07g46090	GO:0005575	C	cellular_component	-7.35312
OS07G0654900	LOC_Os07g46090	GO:0008150	P	biological_process	-7.35312
OS07G0654900	LOC_Os07g46090	GO:0005488	F	binding	-7.35312
OS07G0656200	LOC_Os07g46280	GO:0016787	F	hydrolase activity	-2.95687
OS07G0656200	LOC_Os07g46280	GO:0008152	P	metabolic process	-2.95687
OS07G0656200	LOC_Os07g46280	GO:0005618	C	cell wall	-2.95687
OS07G0656200	LOC_Os07g46280	GO:0005975	P	carbohydrate metabolic process	-2.95687
OS07G0656200	LOC_Os07g46280	GO:0005840	C	ribosome	-2.95687
OS07G0656200	LOC_Os07g46280	GO:0005829	C	cytosol	-2.95687
OS07G0656200	LOC_Os07g46280	GO:0016787	F	hydrolase activity	-2.95687
OS07G0656200	LOC_Os07g46280	GO:0008152	P	metabolic process	-2.95687
OS07G0656200	LOC_Os07g46280	GO:0005618	C	cell wall	-2.95687
OS07G0656200	LOC_Os07g46280	GO:0005975	P	carbohydrate metabolic process	-2.95687
OS07G0656200	LOC_Os07g46280	GO:0005840	C	ribosome	-2.95687
OS07G0656200	LOC_Os07g46280	GO:0005829	C	cytosol	-2.95687
OS07G0656200	LOC_Os07g46280	GO:0016787	F	hydrolase activity	-2.95687
OS07G0656200	LOC_Os07g46280	GO:0008152	P	metabolic process	-2.95687
OS07G0656200	LOC_Os07g46280	GO:0005618	C	cell wall	-2.95687
OS07G0656200	LOC_Os07g46280	GO:0005975	P	carbohydrate metabolic process	-2.95687
OS07G0656200	LOC_Os07g46280	GO:0005840	C	ribosome	-2.95687
OS07G0656200	LOC_Os07g46280	GO:0005829	C	cytosol	-2.95687
OS07G0659900	LOC_Os07g46570	GO:0003824	F	catalytic activity	1.50902
OS07G0659900	LOC_Os07g46570	GO:0003674	F	molecular_function	1.50902
OS07G0659900	LOC_Os07g46570	GO:0008152	P	metabolic process	1.50902
OS07G0659900	LOC_Os07g46570	GO:0019725	P	cellular homeostasis	1.50902
OS07G0662800	LOC_Os07g46780	GO:0016020	C	membrane	2.73505
OS07G0662800	LOC_Os07g46780	GO:0006810	P	transport	2.73505
OS07G0662800	LOC_Os07g46780	GO:0009987	P	cellular process	2.73505
OS07G0662800	LOC_Os07g46780	GO:0005215	F	transporter activity	2.73505
OS07G0662800	LOC_Os07g46780	GO:0016020	C	membrane	2.73505
OS07G0662800	LOC_Os07g46780	GO:0006810	P	transport	2.73505
OS07G0662800	LOC_Os07g46780	GO:0009987	P	cellular process	2.73505
OS07G0662800	LOC_Os07g46780	GO:0005215	F	transporter activity	2.73505
OS07G0662800	LOC_Os07g46780	GO:0016020	C	membrane	2.73505
OS07G0662800	LOC_Os07g46780	GO:0006810	P	transport	2.73505
OS07G0662800	LOC_Os07g46780	GO:0009987	P	cellular process	2.73505
OS07G0662800	LOC_Os07g46780	GO:0005215	F	transporter activity	2.73505
OS07G0665300	LOC_Os07g47000	None	None	None	-3.70893
OS07G0681300	LOC_Os07g48330	GO:0005623	C	cell	4.04437
OS07G0681300	LOC_Os07g48330	GO:0003674	F	molecular_function	4.04437
OS07G0681300	LOC_Os07g48330	GO:0005488	F	binding	4.04437
OS07G0681300	LOC_Os07g48330	GO:0003824	F	catalytic activity	4.04437
OS07G0681300	LOC_Os07g48330	GO:0008152	P	metabolic process	4.04437
OS07G0681300	LOC_Os07g48330	GO:0019825	F	oxygen binding	4.04437
OS08G0104600	LOC_Os08g01380	GO:0003674	F	molecular_function	3.96471
OS08G0104600	LOC_Os08g01380	GO:0005488	F	binding	3.96471
OS08G0104600	LOC_Os08g01380	GO:0005515	F	protein binding	3.96471
OS08G0104600	LOC_Os08g01380	GO:0006091	P	generation of precursor metabolites and energy	3.96471
OS08G0104600	LOC_Os08g01380	GO:0015979	P	photosynthesis	3.96471
OS08G0104600	LOC_Os08g01380	GO:0009628	P	response to abiotic stimulus	3.96471
OS08G0104600	LOC_Os08g01380	GO:0009536	C	plastid	3.96471
OS08G0104600	LOC_Os08g01380	GO:0003674	F	molecular_function	3.96471
OS08G0104600	LOC_Os08g01380	GO:0005488	F	binding	3.96471
OS08G0104600	LOC_Os08g01380	GO:0005515	F	protein binding	3.96471
OS08G0104600	LOC_Os08g01380	GO:0006091	P	generation of precursor metabolites and energy	3.96471
OS08G0104600	LOC_Os08g01380	GO:0015979	P	photosynthesis	3.96471
OS08G0104600	LOC_Os08g01380	GO:0009628	P	response to abiotic stimulus	3.96471
OS08G0104600	LOC_Os08g01380	GO:0009536	C	plastid	3.96471
OS08G0131300	LOC_Os08g03700	GO:0008152	P	metabolic process	-3.4307
OS08G0131300	LOC_Os08g03700	GO:0016740	F	transferase activity	-3.4307
OS08G0163100	LOC_Os08g06600	GO:0003674	F	molecular_function	-3.61043
OS08G0163100	LOC_Os08g06600	GO:0016020	C	membrane	-3.61043
OS08G0163100	LOC_Os08g06600	GO:0005773	C	vacuole	-3.61043
OS08G0163100	LOC_Os08g06600	GO:0005886	C	plasma membrane	-3.61043
OS08G0163100	LOC_Os08g06600	GO:0016043	P	cellular component organization	-3.61043
OS08G0163100	LOC_Os08g06600	GO:0007049	P	cell cycle	-3.61043
OS08G0169800	LOC_Os08g07300	GO:0005575	C	cellular_component	-1.3305
OS08G0169800	LOC_Os08g07300	GO:0008152	P	metabolic process	-1.3305
OS08G0169800	LOC_Os08g07300	GO:0016787	F	hydrolase activity	-1.3305
OS08G0169800	LOC_Os08g07300	GO:0009987	P	cellular process	-1.3305
OS08G0169800	LOC_Os08g07300	GO:0003824	F	catalytic activity	-1.3305
OS08G0169800	LOC_Os08g07300	GO:0005575	C	cellular_component	-1.3305
OS08G0169800	LOC_Os08g07300	GO:0008152	P	metabolic process	-1.3305
OS08G0169800	LOC_Os08g07300	GO:0016787	F	hydrolase activity	-1.3305
OS08G0169800	LOC_Os08g07300	GO:0009987	P	cellular process	-1.3305
OS08G0169800	LOC_Os08g07300	GO:0003824	F	catalytic activity	-1.3305
OS08G0170700	LOC_Os08g07380	None	None	None	4.02999
OS08G0170800	LOC_Os08g07390	None	None	None	3.94037
OS08G0174750	None	None	None	None	-2.70521
OS08G0174800	LOC_Os08g07774	GO:0005623	C	cell	-5.75031
OS08G0174800	LOC_Os08g07774	GO:0000166	F	nucleotide binding	-5.75031
OS08G0174800	LOC_Os08g07774	GO:0006950	P	response to stress	-5.75031
OS08G0174800	LOC_Os08g07774	GO:0008152	P	metabolic process	-5.75031
OS08G0174800	LOC_Os08g07774	GO:0009987	P	cellular process	-5.75031
OS08G0174800	LOC_Os08g07774	GO:0005102	F	receptor binding	-5.75031
OS08G0174800	LOC_Os08g07774	GO:0016301	F	kinase activity	-5.75031
OS08G0174800	LOC_Os08g07774	GO:0006464	P	protein modification process	-5.75031
OS08G0174800	LOC_Os08g07774	GO:0007275	P	multicellular organismal development	-5.75031
OS08G0174800	LOC_Os08g07774	GO:0005886	C	plasma membrane	-5.75031
OS08G0174800	LOC_Os08g07774	GO:0007049	P	cell cycle	-5.75031
OS08G0178700	LOC_Os08g08110	GO:0016301	F	kinase activity	0.797876
OS08G0178700	LOC_Os08g08110	GO:0007165	P	signal transduction	0.797876
OS08G0178700	LOC_Os08g08110	GO:0006464	P	protein modification process	0.797876
OS08G0180950	None	None	None	None	5.12248
OS08G0184300	LOC_Os08g08570	None	None	None	7.40077
OS08G0184600	LOC_Os08g08586	None	None	None	-3.25872
OS08G0185701	None	None	None	None	11.6392
OS08G0185900	LOC_Os08g08700	GO:0016020	C	membrane	9.80734
OS08G0185900	LOC_Os08g08700	GO:0005773	C	vacuole	9.80734
OS08G0185900	LOC_Os08g08700	GO:0019538	P	protein metabolic process	9.80734
OS08G0185900	LOC_Os08g08700	GO:0009056	P	catabolic process	9.80734
OS08G0185900	LOC_Os08g08700	GO:0009987	P	cellular process	9.80734
OS08G0185900	LOC_Os08g08700	GO:0006464	P	protein modification process	9.80734
OS08G0185900	LOC_Os08g08700	GO:0005730	C	nucleolus	9.80734
OS08G0185900	LOC_Os08g08700	GO:0005618	C	cell wall	9.80734
OS08G0185900	LOC_Os08g08700	GO:0005622	C	intracellular	9.80734
OS08G0186200	LOC_Os08g08710	None	None	None	8.26825
OS08G0191700	LOC_Os08g09250	GO:0003824	F	catalytic activity	0.296732
OS08G0191700	LOC_Os08g09250	GO:0008152	P	metabolic process	0.296732
OS08G0191700	LOC_Os08g09250	GO:0005777	C	peroxisome	0.296732
OS08G0191700	LOC_Os08g09250	GO:0005773	C	vacuole	0.296732
OS08G0191700	LOC_Os08g09250	GO:0005488	F	binding	0.296732
OS08G0191700	LOC_Os08g09250	GO:0008150	P	biological_process	0.296732
OS08G0191700	LOC_Os08g09250	GO:0005829	C	cytosol	0.296732
OS08G0191700	LOC_Os08g09250	GO:0005975	P	carbohydrate metabolic process	0.296732
OS08G0191700	LOC_Os08g09250	GO:0009536	C	plastid	0.296732
OS08G0191700	LOC_Os08g09250	GO:0005886	C	plasma membrane	0.296732
OS08G0191700	LOC_Os08g09250	GO:0003824	F	catalytic activity	0.296732
OS08G0191700	LOC_Os08g09250	GO:0008152	P	metabolic process	0.296732
OS08G0191700	LOC_Os08g09250	GO:0005777	C	peroxisome	0.296732
OS08G0191700	LOC_Os08g09250	GO:0005773	C	vacuole	0.296732
OS08G0191700	LOC_Os08g09250	GO:0005488	F	binding	0.296732
OS08G0191700	LOC_Os08g09250	GO:0008150	P	biological_process	0.296732
OS08G0191700	LOC_Os08g09250	GO:0005829	C	cytosol	0.296732
OS08G0191700	LOC_Os08g09250	GO:0005975	P	carbohydrate metabolic process	0.296732
OS08G0191700	LOC_Os08g09250	GO:0009536	C	plastid	0.296732
OS08G0191700	LOC_Os08g09250	GO:0005886	C	plasma membrane	0.296732
OS08G0191700	LOC_Os08g09250	GO:0003824	F	catalytic activity	0.296732
OS08G0191700	LOC_Os08g09250	GO:0008152	P	metabolic process	0.296732
OS08G0191700	LOC_Os08g09250	GO:0006950	P	response to stress	0.296732
OS08G0191700	LOC_Os08g09250	GO:0009628	P	response to abiotic stimulus	0.296732
OS08G0191700	LOC_Os08g09250	GO:0009579	C	thylakoid	0.296732
OS08G0191700	LOC_Os08g09250	GO:0005488	F	binding	0.296732
OS08G0191700	LOC_Os08g09250	GO:0005975	P	carbohydrate metabolic process	0.296732
OS08G0191700	LOC_Os08g09250	GO:0009536	C	plastid	0.296732
OS08G0194900	LOC_Os08g09570	GO:0003674	F	molecular_function	-4.63119
OS08G0194900	LOC_Os08g09570	GO:0005575	C	cellular_component	-4.63119
OS08G0194900	LOC_Os08g09570	GO:0008150	P	biological_process	-4.63119
OS08G0196200	LOC_Os08g09670	GO:0003674	F	molecular_function	-1.4535
OS08G0196200	LOC_Os08g09670	GO:0005575	C	cellular_component	-1.4535
OS08G0196200	LOC_Os08g09670	GO:0008150	P	biological_process	-1.4535
OS08G0198800	LOC_Os08g09890	None	None	None	-3.63684
OS08G0199400	LOC_Os08g09950	GO:0003824	F	catalytic activity	-2.09922
OS08G0199400	LOC_Os08g09950	GO:0009987	P	cellular process	-2.09922
OS08G0199400	LOC_Os08g09950	GO:0006629	P	lipid metabolic process	-2.09922
OS08G0199400	LOC_Os08g09950	GO:0005488	F	binding	-2.09922
OS08G0199400	LOC_Os08g09950	GO:0009058	P	biosynthetic process	-2.09922
OS08G0199400	LOC_Os08g09950	GO:0008152	P	metabolic process	-2.09922
OS08G0199400	LOC_Os08g09950	GO:0009536	C	plastid	-2.09922
OS08G0199400	LOC_Os08g09950	GO:0003824	F	catalytic activity	-2.09922
OS08G0199400	LOC_Os08g09950	GO:0009987	P	cellular process	-2.09922
OS08G0199400	LOC_Os08g09950	GO:0006629	P	lipid metabolic process	-2.09922
OS08G0199400	LOC_Os08g09950	GO:0005488	F	binding	-2.09922
OS08G0199400	LOC_Os08g09950	GO:0009058	P	biosynthetic process	-2.09922
OS08G0199400	LOC_Os08g09950	GO:0008152	P	metabolic process	-2.09922
OS08G0199400	LOC_Os08g09950	GO:0009536	C	plastid	-2.09922
OS08G0200300	LOC_Os08g10020	GO:0003674	F	molecular_function	6.92236
OS08G0200300	LOC_Os08g10020	GO:0016020	C	membrane	6.92236
OS08G0200300	LOC_Os08g10020	GO:0009536	C	plastid	6.92236
OS08G0200300	LOC_Os08g10020	GO:0009579	C	thylakoid	6.92236
OS08G0200300	LOC_Os08g10020	GO:0016043	P	cellular component organization	6.92236
OS08G0200300	LOC_Os08g10020	GO:0006091	P	generation of precursor metabolites and energy	6.92236
OS08G0200300	LOC_Os08g10020	GO:0015979	P	photosynthesis	6.92236
OS08G0200300	LOC_Os08g10020	GO:0003674	F	molecular_function	6.92236
OS08G0200300	LOC_Os08g10020	GO:0016020	C	membrane	6.92236
OS08G0200300	LOC_Os08g10020	GO:0009536	C	plastid	6.92236
OS08G0200300	LOC_Os08g10020	GO:0009579	C	thylakoid	6.92236
OS08G0200300	LOC_Os08g10020	GO:0016043	P	cellular component organization	6.92236
OS08G0200300	LOC_Os08g10020	GO:0006091	P	generation of precursor metabolites and energy	6.92236
OS08G0200300	LOC_Os08g10020	GO:0015979	P	photosynthesis	6.92236
OS08G0200300	LOC_Os08g10020	GO:0003674	F	molecular_function	6.92236
OS08G0200300	LOC_Os08g10020	GO:0016020	C	membrane	6.92236
OS08G0200300	LOC_Os08g10020	GO:0009536	C	plastid	6.92236
OS08G0200300	LOC_Os08g10020	GO:0009579	C	thylakoid	6.92236
OS08G0200300	LOC_Os08g10020	GO:0016043	P	cellular component organization	6.92236
OS08G0200300	LOC_Os08g10020	GO:0006091	P	generation of precursor metabolites and energy	6.92236
OS08G0200300	LOC_Os08g10020	GO:0015979	P	photosynthesis	6.92236
OS08G0204632	LOC_Os08g10400	GO:0003674	F	molecular_function	4.47117
OS08G0204632	LOC_Os08g10400	GO:0008150	P	biological_process	4.47117
OS08G0205150	LOC_Os08g10440	GO:0005623	C	cell	-1.64745
OS08G0205150	LOC_Os08g10440	GO:0000166	F	nucleotide binding	-1.64745
OS08G0205150	LOC_Os08g10440	GO:0006950	P	response to stress	-1.64745
OS08G0207800	LOC_Os08g10670	GO:0019538	P	protein metabolic process	6.80803
OS08G0207800	LOC_Os08g10670	GO:0016787	F	hydrolase activity	6.80803
OS08G0207800	LOC_Os08g10670	GO:0019538	P	protein metabolic process	6.80803
OS08G0207800	LOC_Os08g10670	GO:0016787	F	hydrolase activity	6.80803
OS08G0209000	None	None	None	None	4.13591
OS08G0229200	None	None	None	None	2.92473
OS08G0236900	LOC_Os08g13910	None	None	None	10.9437
OS08G0236900	LOC_Os08g13880	None	None	None	10.9437
OS08G0237000	LOC_Os08g13920	GO:0005623	C	cell	0.961794
OS08G0237000	LOC_Os08g13920	GO:0005576	C	extracellular region	0.961794
OS08G0237000	LOC_Os08g13920	GO:0016740	F	transferase activity	0.961794
OS08G0237000	LOC_Os08g13920	GO:0008152	P	metabolic process	0.961794
OS08G0237000	LOC_Os08g13920	GO:0005618	C	cell wall	0.961794
OS08G0237000	LOC_Os08g13920	GO:0009987	P	cellular process	0.961794
OS08G0237000	LOC_Os08g13920	GO:0016787	F	hydrolase activity	0.961794
OS08G0268000	LOC_Os08g16720	None	None	None	-1.29368
OS08G0282700	None	None	None	None	4.01087
OS08G0285200	LOC_Os08g18880	GO:0005622	C	intracellular	-2.08171
OS08G0285200	LOC_Os08g18880	GO:0006950	P	response to stress	-2.08171
OS08G0285200	LOC_Os08g18880	GO:0009628	P	response to abiotic stimulus	-2.08171
OS08G0285200	LOC_Os08g18880	GO:0000166	F	nucleotide binding	-2.08171
OS08G0285200	LOC_Os08g18880	GO:0009719	P	response to endogenous stimulus	-2.08171
OS08G0290500	LOC_Os08g19374	GO:0005488	F	binding	-5.23902
OS08G0290500	LOC_Os08g19374	GO:0005488	F	binding	-5.23902
OS08G0290500	LOC_Os08g19374	GO:0005488	F	binding	-5.23902
OS08G0290500	LOC_Os08g19374	GO:0005488	F	binding	-5.23902
OS08G0297800	LOC_Os08g20130	GO:0005575	C	cellular_component	-1.70073
OS08G0297800	LOC_Os08g20130	GO:0008152	P	metabolic process	-1.70073
OS08G0297800	LOC_Os08g20130	GO:0016740	F	transferase activity	-1.70073
OS08G0297800	LOC_Os08g20130	GO:0009719	P	response to endogenous stimulus	-1.70073
OS08G0298700	LOC_Os08g20200	GO:0006950	P	response to stress	-4.12005
OS08G0298700	LOC_Os08g20200	GO:0003824	F	catalytic activity	-4.12005
OS08G0298700	LOC_Os08g20200	GO:0008152	P	metabolic process	-4.12005
OS08G0298700	LOC_Os08g20200	GO:0009058	P	biosynthetic process	-4.12005
OS08G0298700	LOC_Os08g20200	GO:0009987	P	cellular process	-4.12005
OS08G0298700	LOC_Os08g20200	GO:0006629	P	lipid metabolic process	-4.12005
OS08G0298700	LOC_Os08g20200	GO:0019748	P	secondary metabolic process	-4.12005
OS08G0298700	LOC_Os08g20200	GO:0007275	P	multicellular organismal development	-4.12005
OS08G0298700	LOC_Os08g20200	GO:0007049	P	cell cycle	-4.12005
OS08G0298700	LOC_Os08g20200	GO:0009628	P	response to abiotic stimulus	-4.12005
OS08G0298700	LOC_Os08g20200	GO:0009536	C	plastid	-4.12005
OS08G0298700	LOC_Os08g20200	GO:0006950	P	response to stress	-4.12005
OS08G0298700	LOC_Os08g20200	GO:0003824	F	catalytic activity	-4.12005
OS08G0298700	LOC_Os08g20200	GO:0008152	P	metabolic process	-4.12005
OS08G0298700	LOC_Os08g20200	GO:0009058	P	biosynthetic process	-4.12005
OS08G0298700	LOC_Os08g20200	GO:0009987	P	cellular process	-4.12005
OS08G0298700	LOC_Os08g20200	GO:0006629	P	lipid metabolic process	-4.12005
OS08G0298700	LOC_Os08g20200	GO:0019748	P	secondary metabolic process	-4.12005
OS08G0298700	LOC_Os08g20200	GO:0007275	P	multicellular organismal development	-4.12005
OS08G0298700	LOC_Os08g20200	GO:0007049	P	cell cycle	-4.12005
OS08G0298700	LOC_Os08g20200	GO:0009628	P	response to abiotic stimulus	-4.12005
OS08G0298700	LOC_Os08g20200	GO:0009536	C	plastid	-4.12005
OS08G0299801	None	None	None	None	-7.12023
OS08G0316900	LOC_Os08g22604	None	None	None	-1.79203
OS08G0326400	LOC_Os08g23710	GO:0016020	C	membrane	-0.973476
OS08G0326400	LOC_Os08g23710	GO:0005773	C	vacuole	-0.973476
OS08G0326400	LOC_Os08g23710	GO:0005829	C	cytosol	-0.973476
OS08G0326400	LOC_Os08g23710	GO:0005840	C	ribosome	-0.973476
OS08G0326400	LOC_Os08g23710	GO:0006412	P	translation	-0.973476
OS08G0326400	LOC_Os08g23710	GO:0005198	F	structural molecule activity	-0.973476
OS08G0347500	LOC_Os08g25900	GO:0016020	C	membrane	6.27855
OS08G0347500	LOC_Os08g25900	GO:0009579	C	thylakoid	6.27855
OS08G0347500	LOC_Os08g25900	GO:0009536	C	plastid	6.27855
OS08G0347500	LOC_Os08g25900	GO:0005488	F	binding	6.27855
OS08G0347500	LOC_Os08g25900	GO:0015979	P	photosynthesis	6.27855
OS08G0347500	LOC_Os08g25890	GO:0016020	C	membrane	6.27855
OS08G0347500	LOC_Os08g25890	GO:0009536	C	plastid	6.27855
OS08G0347500	LOC_Os08g25890	GO:0009579	C	thylakoid	6.27855
OS08G0347500	LOC_Os08g25890	GO:0016043	P	cellular component organization	6.27855
OS08G0347500	LOC_Os08g25890	GO:0006091	P	generation of precursor metabolites and energy	6.27855
OS08G0347500	LOC_Os08g25890	GO:0015979	P	photosynthesis	6.27855
OS08G0347500	LOC_Os08g25890	GO:0005488	F	binding	6.27855
OS08G0356500	LOC_Os08g26820	GO:0005623	C	cell	1.47829
OS08G0356500	LOC_Os08g26820	GO:0003674	F	molecular_function	1.47829
OS08G0356500	LOC_Os08g26820	GO:0008150	P	biological_process	1.47829
OS08G0356500	LOC_Os08g26820	GO:0005739	C	mitochondrion	1.47829
OS08G0356500	LOC_Os08g26820	GO:0008150	P	biological_process	1.47829
OS08G0356800	LOC_Os08g26850	GO:0005623	C	cell	2.73284
OS08G0356800	LOC_Os08g26850	GO:0003674	F	molecular_function	2.73284
OS08G0356800	LOC_Os08g26850	GO:0008150	P	biological_process	2.73284
OS08G0363000	LOC_Os08g27540	None	None	None	13.2275
OS08G0363800	LOC_Os08g27630	None	None	None	5.51783
OS08G0391300	None	None	None	None	-5.34701
OS08G0394000	None	None	None	None	-2.1555
OS08G0528100	LOC_Os08g41630	GO:0016787	F	hydrolase activity	-6.13565
OS08G0528100	LOC_Os08g41630	GO:0005622	C	intracellular	-6.13565
OS08G0528100	LOC_Os08g41630	GO:0019538	P	protein metabolic process	-6.13565
OS08G0528100	LOC_Os08g41630	GO:0009056	P	catabolic process	-6.13565
OS08G0528100	LOC_Os08g41630	GO:0009987	P	cellular process	-6.13565
OS08G0528100	LOC_Os08g41630	GO:0008152	P	metabolic process	-6.13565
OS08G0528100	LOC_Os08g41630	GO:0009536	C	plastid	-6.13565
OS08G0528700	LOC_Os08g41690	GO:0003674	F	molecular_function	-10.3706
OS08G0528700	LOC_Os08g41690	GO:0005739	C	mitochondrion	-10.3706
OS08G0528700	LOC_Os08g41690	GO:0008150	P	biological_process	-10.3706
OS08G0547900	LOC_Os08g43440	GO:0005623	C	cell	-1.54608
OS08G0547900	LOC_Os08g43440	GO:0003674	F	molecular_function	-1.54608
OS08G0547900	LOC_Os08g43440	GO:0005488	F	binding	-1.54608
OS08G0547900	LOC_Os08g43440	GO:0003824	F	catalytic activity	-1.54608
OS08G0547900	LOC_Os08g43440	GO:0008152	P	metabolic process	-1.54608
OS08G0547900	LOC_Os08g43440	GO:0019825	F	oxygen binding	-1.54608
OS08G0562100	LOC_Os08g44810	GO:0005576	C	extracellular region	1.11291
OS08G0562100	LOC_Os08g44810	GO:0005975	P	carbohydrate metabolic process	1.11291
OS08G0562100	LOC_Os08g44810	GO:0006091	P	generation of precursor metabolites and energy	1.11291
OS08G0562100	LOC_Os08g44810	GO:0009056	P	catabolic process	1.11291
OS08G0562100	LOC_Os08g44810	GO:0008152	P	metabolic process	1.11291
OS08G0562100	LOC_Os08g44810	GO:0009536	C	plastid	1.11291
OS08G0562100	LOC_Os08g44810	GO:0005739	C	mitochondrion	1.11291
OS08G0562100	LOC_Os08g44810	GO:0003824	F	catalytic activity	1.11291
OS08G0562100	LOC_Os08g44810	GO:0009987	P	cellular process	1.11291
OS08G0562100	LOC_Os08g44810	GO:0009579	C	thylakoid	1.11291
OS08G0562100	LOC_Os08g44810	GO:0005488	F	binding	1.11291
OS09G0244600	LOC_Os09g06950	None	None	None	-12.964
OS09G0256100	LOC_Os09g08190	GO:0005575	C	cellular_component	-6.3465
OS09G0256100	LOC_Os09g08190	GO:0008152	P	metabolic process	-6.3465
OS09G0256100	LOC_Os09g08190	GO:0016740	F	transferase activity	-6.3465
OS09G0256100	LOC_Os09g08190	GO:0009719	P	response to endogenous stimulus	-6.3465
OS09G0256100	LOC_Os09g08190	GO:0009987	P	cellular process	-6.3465
OS09G0256100	LOC_Os09g08190	GO:0006629	P	lipid metabolic process	-6.3465
OS09G0263474	None	None	None	None	2.30932
OS09G0269400	None	None	None	None	-12.4703
OS09G0273600	None	None	None	None	-1.95339
OS09G0336600	None	None	None	None	12.2952
OS09G0337300	LOC_Os09g16760	GO:0008150	P	biological_process	12.511
OS09G0344650	None	None	None	None	9.18569
OS09G0347300	LOC_Os09g17810	GO:0005737	C	cytoplasm	-2.84487
OS09G0347300	LOC_Os09g17810	GO:0005829	C	cytosol	-2.84487
OS09G0347300	LOC_Os09g17810	GO:0006810	P	transport	-2.84487
OS09G0347300	LOC_Os09g17810	GO:0009987	P	cellular process	-2.84487
OS09G0347300	LOC_Os09g17810	GO:0005886	C	plasma membrane	-2.84487
OS09G0353400	LOC_Os09g18390	GO:0005575	C	cellular_component	8.67655
OS09G0353400	LOC_Os09g18390	GO:0007275	P	multicellular organismal development	8.67655
OS09G0353400	LOC_Os09g18390	GO:0003824	F	catalytic activity	8.67655
OS09G0353400	LOC_Os09g18390	GO:0009058	P	biosynthetic process	8.67655
OS09G0353400	LOC_Os09g18390	GO:0009987	P	cellular process	8.67655
OS09G0353400	LOC_Os09g18390	GO:0019748	P	secondary metabolic process	8.67655
OS09G0353400	LOC_Os09g18390	GO:0008152	P	metabolic process	8.67655
OS09G0356300	LOC_Os09g19170	None	None	None	-1.21404
OS09G0365300	LOC_Os09g20030	GO:0005515	F	protein binding	-1.90651
OS09G0365300	LOC_Os09g20030	GO:0006950	P	response to stress	-1.90651
OS09G0369400	LOC_Os09g20390	GO:0016787	F	hydrolase activity	13.1506
OS09G0369400	LOC_Os09g20390	GO:0009058	P	biosynthetic process	13.1506
OS09G0369400	LOC_Os09g20390	GO:0005975	P	carbohydrate metabolic process	13.1506
OS09G0369400	LOC_Os09g20390	GO:0009987	P	cellular process	13.1506
OS09G0369400	LOC_Os09g20390	GO:0008152	P	metabolic process	13.1506
OS09G0369400	LOC_Os09g20390	GO:0003824	F	catalytic activity	13.1506
OS09G0369400	LOC_Os09g20390	GO:0016787	F	hydrolase activity	13.1506
OS09G0369400	LOC_Os09g20390	GO:0009058	P	biosynthetic process	13.1506
OS09G0369400	LOC_Os09g20390	GO:0005975	P	carbohydrate metabolic process	13.1506
OS09G0369400	LOC_Os09g20390	GO:0009987	P	cellular process	13.1506
OS09G0369400	LOC_Os09g20390	GO:0008152	P	metabolic process	13.1506
OS09G0369400	LOC_Os09g20390	GO:0003824	F	catalytic activity	13.1506
OS09G0369400	LOC_Os09g20390	GO:0016787	F	hydrolase activity	13.1506
OS09G0369400	LOC_Os09g20390	GO:0009058	P	biosynthetic process	13.1506
OS09G0369400	LOC_Os09g20390	GO:0005975	P	carbohydrate metabolic process	13.1506
OS09G0369400	LOC_Os09g20390	GO:0009987	P	cellular process	13.1506
OS09G0369400	LOC_Os09g20390	GO:0008152	P	metabolic process	13.1506
OS09G0369400	LOC_Os09g20390	GO:0003824	F	catalytic activity	13.1506
OS09G0369400	LOC_Os09g20390	GO:0009536	C	plastid	13.1506
OS09G0434600	LOC_Os09g26430	None	None	None	-5.21109
OS09G0434600	LOC_Os09g26440	GO:0005575	C	cellular_component	-5.21109
OS09G0434600	LOC_Os09g26440	GO:0016740	F	transferase activity	-5.21109
OS09G0434600	LOC_Os09g26440	GO:0009058	P	biosynthetic process	-5.21109
OS09G0478300	LOC_Os09g30130	GO:0016740	F	transferase activity	-3.17611
OS09G0478300	LOC_Os09g30130	GO:0005783	C	endoplasmic reticulum	-3.17611
OS09G0478300	LOC_Os09g30130	GO:0009058	P	biosynthetic process	-3.17611
OS09G0478300	LOC_Os09g30130	GO:0005975	P	carbohydrate metabolic process	-3.17611
OS09G0478300	LOC_Os09g30130	GO:0009987	P	cellular process	-3.17611
OS09G0478300	LOC_Os09g30130	GO:0005886	C	plasma membrane	-3.17611
OS09G0478300	LOC_Os09g30130	GO:0016740	F	transferase activity	-3.17611
OS09G0478300	LOC_Os09g30130	GO:0005783	C	endoplasmic reticulum	-3.17611
OS09G0478300	LOC_Os09g30130	GO:0009058	P	biosynthetic process	-3.17611
OS09G0478300	LOC_Os09g30130	GO:0005975	P	carbohydrate metabolic process	-3.17611
OS09G0478300	LOC_Os09g30130	GO:0009987	P	cellular process	-3.17611
OS09G0478300	LOC_Os09g30130	GO:0005886	C	plasma membrane	-3.17611
OS09G0482860	LOC_Os09g30510	GO:0016740	F	transferase activity	3.58492
OS09G0482860	LOC_Os09g30510	GO:0008152	P	metabolic process	3.58492
OS09G0482860	LOC_Os09g30510	GO:0005829	C	cytosol	3.58492
OS09G0537700	LOC_Os09g36680	GO:0005623	C	cell	-4.26031
OS09G0537700	LOC_Os09g36680	GO:0004518	F	nuclease activity	-4.26031
OS09G0537700	LOC_Os09g36680	GO:0003723	F	RNA binding	-4.26031
OS09G0537700	LOC_Os09g36680	GO:0008152	P	metabolic process	-4.26031
OS09G0537700	LOC_Os09g36680	GO:0008150	P	biological_process	-4.26031
OS10G0129200	LOC_Os10g03950	GO:0005623	C	cell	-7.41457
OS10G0129200	LOC_Os10g03950	GO:0008152	P	metabolic process	-7.41457
OS10G0129200	LOC_Os10g03950	GO:0009987	P	cellular process	-7.41457
OS10G0129200	LOC_Os10g03950	GO:0016301	F	kinase activity	-7.41457
OS10G0129200	LOC_Os10g03950	GO:0006464	P	protein modification process	-7.41457
OS10G0130701	LOC_Os10g04074	None	None	None	-2.64452
OS10G0132800	None	None	None	None	-6.38924
OS10G0141500	LOC_Os10g05190	None	None	None	-3.14958
OS10G0150600	LOC_Os10g05980	GO:0005618	C	cell wall	3.57193
OS10G0150800	LOC_Os10g06000	GO:0005618	C	cell wall	2.63256
OS10G0195000	LOC_Os10g11860	GO:0006810	P	transport	-1.88411
OS10G0195000	LOC_Os10g11860	GO:0016020	C	membrane	-1.88411
OS10G0195000	LOC_Os10g11860	GO:0009987	P	cellular process	-1.88411
OS10G0195000	LOC_Os10g11860	GO:0005215	F	transporter activity	-1.88411
OS10G0195250	LOC_Os10g11889	None	None	None	-6.65177
OS10G0317300	LOC_Os10g16930	None	None	None	1.93205
OS10G0336600	None	None	None	None	-3.64648
OS10G0351500	LOC_Os10g21090	GO:0005623	C	cell	-3.11537
OS10G0351500	LOC_Os10g21090	GO:0000166	F	nucleotide binding	-3.11537
OS10G0351500	LOC_Os10g21090	GO:0016301	F	kinase activity	-3.11537
OS10G0351500	LOC_Os10g21090	GO:0006464	P	protein modification process	-3.11537
OS10G0355800	LOC_Os10g21266	GO:0016020	C	membrane	5.724
OS10G0355800	LOC_Os10g21266	GO:0006950	P	response to stress	5.724
OS10G0355800	LOC_Os10g21266	GO:0009607	P	response to biotic stimulus	5.724
OS10G0355800	LOC_Os10g21266	GO:0009536	C	plastid	5.724
OS10G0355800	LOC_Os10g21266	GO:0009579	C	thylakoid	5.724
OS10G0355800	LOC_Os10g21266	GO:0005739	C	mitochondrion	5.724
OS10G0355800	LOC_Os10g21266	GO:0005488	F	binding	5.724
OS10G0355800	LOC_Os10g21266	GO:0005215	F	transporter activity	5.724
OS10G0355800	LOC_Os10g21266	GO:0009628	P	response to abiotic stimulus	5.724
OS10G0355800	LOC_Os10g21266	GO:0006810	P	transport	5.724
OS10G0355800	LOC_Os10g21266	GO:0009058	P	biosynthetic process	5.724
OS10G0355800	LOC_Os10g21266	GO:0006139	P	nucleobase, nucleoside, nucleotide and nucleic acid metabolic process	5.724
OS10G0355800	LOC_Os10g21266	GO:0005618	C	cell wall	5.724
OS10G0355800	LOC_Os10g21264	GO:0016020	C	membrane	5.724
OS10G0355800	LOC_Os10g21264	GO:0009536	C	plastid	5.724
OS10G0355800	LOC_Os10g21264	GO:0009579	C	thylakoid	5.724
OS10G0355800	LOC_Os10g21264	GO:0006810	P	transport	5.724
OS10G0355800	LOC_Os10g21264	GO:0006139	P	nucleobase, nucleoside, nucleotide and nucleic acid metabolic process	5.724
OS10G0355800	LOC_Os10g21264	GO:0009058	P	biosynthetic process	5.724
OS10G0355800	LOC_Os10g21264	GO:0006091	P	generation of precursor metabolites and energy	5.724
OS10G0355800	LOC_Os10g21264	GO:0005622	C	intracellular	5.724
OS10G0355800	LOC_Os10g21264	GO:0005215	F	transporter activity	5.724
OS10G0396300	LOC_Os10g25674	GO:0007275	P	multicellular organismal development	1.44222
OS10G0396300	LOC_Os10g25674	GO:0007049	P	cell cycle	1.44222
OS10G0396300	LOC_Os10g25674	GO:0005634	C	nucleus	1.44222
OS10G0396300	LOC_Os10g25674	GO:0007275	P	multicellular organismal development	1.44222
OS10G0396300	LOC_Os10g25674	GO:0007049	P	cell cycle	1.44222
OS10G0396300	LOC_Os10g25674	GO:0005634	C	nucleus	1.44222
OS10G0409400	LOC_Os10g26940	GO:0005623	C	cell	3.77615
OS10G0409400	LOC_Os10g26940	GO:0008152	P	metabolic process	3.77615
OS10G0409400	LOC_Os10g26940	GO:0008150	P	biological_process	3.77615
OS10G0409400	LOC_Os10g26940	GO:0016787	F	hydrolase activity	3.77615
OS10G0413101	LOC_Os10g27310	None	None	None	-7.87788
OS10G0490900	LOC_Os10g34920	GO:0005623	C	cell	3.24349
OS10G0490900	LOC_Os10g34920	GO:0006950	P	response to stress	3.24349
OS10G0495200	LOC_Os10g35240	GO:0003723	F	RNA binding	-2.49496
OS10G0495200	LOC_Os10g35240	GO:0006139	P	nucleobase, nucleoside, nucleotide and nucleic acid metabolic process	-2.49496
OS10G0495200	LOC_Os10g35240	GO:0005739	C	mitochondrion	-2.49496
OS10G0495200	LOC_Os10g35240	GO:0003723	F	RNA binding	-2.49496
OS10G0495200	LOC_Os10g35240	GO:0006139	P	nucleobase, nucleoside, nucleotide and nucleic acid metabolic process	-2.49496
OS10G0495200	LOC_Os10g35240	GO:0005739	C	mitochondrion	-2.49496
OS10G0496900	LOC_Os10g35370	GO:0016020	C	membrane	3.51474
OS10G0496900	LOC_Os10g35370	GO:0009536	C	plastid	3.51474
OS10G0496900	LOC_Os10g35370	GO:0009579	C	thylakoid	3.51474
OS10G0496900	LOC_Os10g35370	GO:0008152	P	metabolic process	3.51474
OS10G0496900	LOC_Os10g35370	GO:0009719	P	response to endogenous stimulus	3.51474
OS10G0496900	LOC_Os10g35370	GO:0003824	F	catalytic activity	3.51474
OS10G0496900	LOC_Os10g35370	GO:0009058	P	biosynthetic process	3.51474
OS10G0496900	LOC_Os10g35370	GO:0009987	P	cellular process	3.51474
OS10G0496900	LOC_Os10g35370	GO:0008152	P	metabolic process	3.51474
OS10G0496900	LOC_Os10g35370	GO:0009719	P	response to endogenous stimulus	3.51474
OS10G0496900	LOC_Os10g35370	GO:0003824	F	catalytic activity	3.51474
OS10G0496900	LOC_Os10g35370	GO:0009058	P	biosynthetic process	3.51474
OS10G0496900	LOC_Os10g35370	GO:0009987	P	cellular process	3.51474
OS10G0496900	LOC_Os10g35370	GO:0009536	C	plastid	3.51474
OS10G0497300	LOC_Os10g35436	GO:0003723	F	RNA binding	-1.93025
OS10G0497300	LOC_Os10g35436	GO:0006139	P	nucleobase, nucleoside, nucleotide and nucleic acid metabolic process	-1.93025
OS10G0497300	LOC_Os10g35436	GO:0005739	C	mitochondrion	-1.93025
OS10G0536100	LOC_Os10g39130	GO:0005634	C	nucleus	-2.89066
OS10G0536100	LOC_Os10g39130	GO:0007275	P	multicellular organismal development	-2.89066
OS10G0536100	LOC_Os10g39130	GO:0005515	F	protein binding	-2.89066
OS10G0536100	LOC_Os10g39130	GO:0009058	P	biosynthetic process	-2.89066
OS10G0536100	LOC_Os10g39130	GO:0006139	P	nucleobase, nucleoside, nucleotide and nucleic acid metabolic process	-2.89066
OS10G0536100	LOC_Os10g39130	GO:0006950	P	response to stress	-2.89066
OS10G0536100	LOC_Os10g39130	GO:0009628	P	response to abiotic stimulus	-2.89066
OS10G0536100	LOC_Os10g39130	GO:0003700	F	sequence-specific DNA binding transcription factor activity	-2.89066
OS10G0536100	LOC_Os10g39130	GO:0003677	F	DNA binding	-2.89066
OS10G0536100	LOC_Os10g39130	GO:0005634	C	nucleus	-2.89066
OS10G0536100	LOC_Os10g39130	GO:0005515	F	protein binding	-2.89066
OS10G0536100	LOC_Os10g39130	GO:0009058	P	biosynthetic process	-2.89066
OS10G0536100	LOC_Os10g39130	GO:0006139	P	nucleobase, nucleoside, nucleotide and nucleic acid metabolic process	-2.89066
OS10G0536100	LOC_Os10g39130	GO:0003700	F	sequence-specific DNA binding transcription factor activity	-2.89066
OS10G0545100	LOC_Os10g39800	GO:0003674	F	molecular_function	1.78726
OS10G0545100	LOC_Os10g39800	GO:0007275	P	multicellular organismal development	1.78726
OS10G0545100	LOC_Os10g39800	GO:0009536	C	plastid	1.78726
OS11G0100100	LOC_Os11g01010	GO:0003824	F	catalytic activity	-5.4129
OS11G0100100	LOC_Os11g01010	GO:0016787	F	hydrolase activity	-5.4129
OS11G0100100	LOC_Os11g01010	GO:0009056	P	catabolic process	-5.4129
OS11G0100100	LOC_Os11g01010	GO:0009987	P	cellular process	-5.4129
OS11G0100100	LOC_Os11g01010	GO:0005515	F	protein binding	-5.4129
OS11G0100100	LOC_Os11g01010	GO:0005737	C	cytoplasm	-5.4129
OS11G0100100	LOC_Os11g01010	GO:0005773	C	vacuole	-5.4129
OS11G0146000	LOC_Os11g04894	None	None	None	5.21412
OS11G0146100	LOC_Os11g04900	None	None	None	4.70112
OS11G0146200	LOC_Os11g04910	None	None	None	9.85182
OS11G0171300	LOC_Os11g07020	GO:0016020	C	membrane	5.03356
OS11G0171300	LOC_Os11g07020	GO:0009536	C	plastid	5.03356
OS11G0171300	LOC_Os11g07020	GO:0005576	C	extracellular region	5.03356
OS11G0171300	LOC_Os11g07020	GO:0008152	P	metabolic process	5.03356
OS11G0171300	LOC_Os11g07020	GO:0003824	F	catalytic activity	5.03356
OS11G0171300	LOC_Os11g07020	GO:0009579	C	thylakoid	5.03356
OS11G0171300	LOC_Os11g07020	GO:0009719	P	response to endogenous stimulus	5.03356
OS11G0171300	LOC_Os11g07020	GO:0008150	P	biological_process	5.03356
OS11G0171300	LOC_Os11g07020	GO:0005975	P	carbohydrate metabolic process	5.03356
OS11G0171300	LOC_Os11g07020	GO:0006139	P	nucleobase, nucleoside, nucleotide and nucleic acid metabolic process	5.03356
OS11G0171300	LOC_Os11g07020	GO:0009056	P	catabolic process	5.03356
OS11G0171300	LOC_Os11g07020	GO:0009536	C	plastid	5.03356
OS11G0171300	LOC_Os11g07020	GO:0005576	C	extracellular region	5.03356
OS11G0171300	LOC_Os11g07020	GO:0008152	P	metabolic process	5.03356
OS11G0171300	LOC_Os11g07020	GO:0003824	F	catalytic activity	5.03356
OS11G0171300	LOC_Os11g07020	GO:0009579	C	thylakoid	5.03356
OS11G0171300	LOC_Os11g07020	GO:0008150	P	biological_process	5.03356
OS11G0171300	LOC_Os11g07020	GO:0005975	P	carbohydrate metabolic process	5.03356
OS11G0171300	LOC_Os11g07020	GO:0006139	P	nucleobase, nucleoside, nucleotide and nucleic acid metabolic process	5.03356
OS11G0171300	LOC_Os11g07020	GO:0009056	P	catabolic process	5.03356
OS11G0171300	LOC_Os11g07020	GO:0005840	C	ribosome	5.03356
OS11G0171300	LOC_Os11g07020	GO:0005829	C	cytosol	5.03356
OS11G0171300	LOC_Os11g07020	GO:0016020	C	membrane	5.03356
OS11G0171300	LOC_Os11g07020	GO:0009536	C	plastid	5.03356
OS11G0171300	LOC_Os11g07020	GO:0005576	C	extracellular region	5.03356
OS11G0171300	LOC_Os11g07020	GO:0008152	P	metabolic process	5.03356
OS11G0171300	LOC_Os11g07020	GO:0003824	F	catalytic activity	5.03356
OS11G0171300	LOC_Os11g07020	GO:0009579	C	thylakoid	5.03356
OS11G0171300	LOC_Os11g07020	GO:0009719	P	response to endogenous stimulus	5.03356
OS11G0171300	LOC_Os11g07020	GO:0008150	P	biological_process	5.03356
OS11G0171300	LOC_Os11g07020	GO:0005975	P	carbohydrate metabolic process	5.03356
OS11G0171300	LOC_Os11g07020	GO:0006139	P	nucleobase, nucleoside, nucleotide and nucleic acid metabolic process	5.03356
OS11G0171300	LOC_Os11g07020	GO:0009056	P	catabolic process	5.03356
OS11G0171300	LOC_Os11g07020	GO:0016020	C	membrane	5.03356
OS11G0171300	LOC_Os11g07020	GO:0009536	C	plastid	5.03356
OS11G0171300	LOC_Os11g07020	GO:0005576	C	extracellular region	5.03356
OS11G0171300	LOC_Os11g07020	GO:0008152	P	metabolic process	5.03356
OS11G0171300	LOC_Os11g07020	GO:0003824	F	catalytic activity	5.03356
OS11G0171300	LOC_Os11g07020	GO:0009579	C	thylakoid	5.03356
OS11G0171300	LOC_Os11g07020	GO:0009719	P	response to endogenous stimulus	5.03356
OS11G0171300	LOC_Os11g07020	GO:0008150	P	biological_process	5.03356
OS11G0171300	LOC_Os11g07020	GO:0005975	P	carbohydrate metabolic process	5.03356
OS11G0171300	LOC_Os11g07020	GO:0006139	P	nucleobase, nucleoside, nucleotide and nucleic acid metabolic process	5.03356
OS11G0171300	LOC_Os11g07020	GO:0009056	P	catabolic process	5.03356
OS11G0171300	LOC_Os11g07020	GO:0016020	C	membrane	5.03356
OS11G0171300	LOC_Os11g07020	GO:0009536	C	plastid	5.03356
OS11G0171300	LOC_Os11g07020	GO:0005576	C	extracellular region	5.03356
OS11G0171300	LOC_Os11g07020	GO:0008152	P	metabolic process	5.03356
OS11G0171300	LOC_Os11g07020	GO:0003824	F	catalytic activity	5.03356
OS11G0171300	LOC_Os11g07020	GO:0009579	C	thylakoid	5.03356
OS11G0171300	LOC_Os11g07020	GO:0009719	P	response to endogenous stimulus	5.03356
OS11G0171300	LOC_Os11g07020	GO:0008150	P	biological_process	5.03356
OS11G0171300	LOC_Os11g07020	GO:0005975	P	carbohydrate metabolic process	5.03356
OS11G0171300	LOC_Os11g07020	GO:0006139	P	nucleobase, nucleoside, nucleotide and nucleic acid metabolic process	5.03356
OS11G0171300	LOC_Os11g07020	GO:0009056	P	catabolic process	5.03356
OS11G0189600	LOC_Os11g08569	GO:0007275	P	multicellular organismal development	4.67433
OS11G0189600	LOC_Os11g08569	GO:0003824	F	catalytic activity	4.67433
OS11G0189600	LOC_Os11g08569	GO:0016043	P	cellular component organization	4.67433
OS11G0189600	LOC_Os11g08569	GO:0009987	P	cellular process	4.67433
OS11G0189600	LOC_Os11g08569	GO:0009058	P	biosynthetic process	4.67433
OS11G0189600	LOC_Os11g08569	GO:0006629	P	lipid metabolic process	4.67433
OS11G0189600	LOC_Os11g08569	GO:0005773	C	vacuole	4.67433
OS11G0224040	None	None	None	None	-4.85933
OS11G0229000	None	None	None	None	-7.95569
OS11G0252400	LOC_Os11g14570	GO:0005575	C	cellular_component	4.60065
OS11G0252400	LOC_Os11g14570	GO:0008150	P	biological_process	4.60065
OS11G0252400	LOC_Os11g14570	GO:0005575	C	cellular_component	4.60065
OS11G0252400	LOC_Os11g14570	GO:0008150	P	biological_process	4.60065
OS11G0269700	LOC_Os11g16924	None	None	None	-2.04032
OS11G0278300	LOC_Os11g17720	GO:0008150	P	biological_process	-6.41638
OS11G0278300	LOC_Os11g17720	GO:0005886	C	plasma membrane	-6.41638
OS11G0282700	LOC_Os11g17954	None	None	None	-12.3505
OS11G0440866	None	None	None	None	-0.0667654
OS11G0452400	LOC_Os11g26594	None	None	None	-1.47913
OS11G0460700	LOC_Os11g27250	GO:0006139	P	nucleobase, nucleoside, nucleotide and nucleic acid metabolic process	8.25122
OS11G0460700	LOC_Os11g27250	GO:0009536	C	plastid	8.25122
OS11G0485900	LOC_Os11g29520	GO:0005515	F	protein binding	9.60693
OS11G0485900	LOC_Os11g29520	GO:0006950	P	response to stress	9.60693
OS11G0503400	LOC_Os11g30790	GO:0005575	C	cellular_component	9.28265
OS11G0503400	LOC_Os11g30790	GO:0008150	P	biological_process	9.28265
OS11G0503400	LOC_Os11g30790	GO:0005488	F	binding	9.28265
OS11G0539600	LOC_Os11g33310	GO:0003674	F	molecular_function	-10.8832
OS11G0539600	LOC_Os11g33310	GO:0005575	C	cellular_component	-10.8832
OS11G0539600	LOC_Os11g33310	GO:0008150	P	biological_process	-10.8832
OS11G0539700	LOC_Os11g33320	GO:0003674	F	molecular_function	-3.72162
OS11G0539700	LOC_Os11g33320	GO:0008150	P	biological_process	-3.72162
OS11G0539901	None	None	None	None	5.1392
OS11G0540100	None	None	None	None	4.87015
OS11G0547800	None	None	None	None	-8.10728
OS11G0548600	LOC_Os11g34570	GO:0003674	F	molecular_function	-7.27978
OS11G0548600	LOC_Os11g34570	GO:0005575	C	cellular_component	-7.27978
OS11G0548600	LOC_Os11g34570	GO:0009056	P	catabolic process	-7.27978
OS11G0548600	LOC_Os11g34570	GO:0005886	C	plasma membrane	-7.27978
OS11G0548600	LOC_Os11g34570	GO:0016020	C	membrane	-7.27978
OS11G0549665	LOC_Os11g34790	None	None	None	-1.25413
OS11G0549680	LOC_Os11g34820	GO:0003674	F	molecular_function	-9.46387
OS11G0549680	LOC_Os11g34820	GO:0005829	C	cytosol	-9.46387
OS11G0549680	LOC_Os11g34820	GO:0008150	P	biological_process	-9.46387
OS11G0550300	LOC_Os11g34910	None	None	None	9.15409
OS11G0550800	LOC_Os11g34940	GO:0006412	P	translation	3.51653
OS11G0550800	LOC_Os11g34940	GO:0005198	F	structural molecule activity	3.51653
OS11G0550800	LOC_Os11g34940	GO:0003723	F	RNA binding	3.51653
OS11G0550800	LOC_Os11g34940	GO:0009536	C	plastid	3.51653
OS11G0576975	None	None	None	None	8.8242
OS11G0594700	LOC_Os11g38210	GO:0005576	C	extracellular region	-2.5663
OS11G0594700	LOC_Os11g38210	GO:0005515	F	protein binding	-2.5663
OS11G0594700	LOC_Os11g38210	GO:0008150	P	biological_process	-2.5663
OS11G0594800	LOC_Os11g38220	GO:0005575	C	cellular_component	6.03699
OS11G0594800	LOC_Os11g38220	GO:0008150	P	biological_process	6.03699
OS11G0611600	None	None	None	None	3.07317
OS11G0615800	LOC_Os11g40150	GO:0003677	F	DNA binding	-1.75814
OS11G0615800	LOC_Os11g40150	GO:0005634	C	nucleus	-1.75814
OS11G0615800	LOC_Os11g40150	GO:0008152	P	metabolic process	-1.75814
OS11G0615800	LOC_Os11g40150	GO:0006950	P	response to stress	-1.75814
OS11G0615800	LOC_Os11g40150	GO:0006259	P	DNA metabolic process	-1.75814
OS11G0615800	LOC_Os11g40150	GO:0000166	F	nucleotide binding	-1.75814
OS11G0615800	LOC_Os11g40150	GO:0009058	P	biosynthetic process	-1.75814
OS11G0615800	LOC_Os11g40150	GO:0006139	P	nucleobase, nucleoside, nucleotide and nucleic acid metabolic process	-1.75814
OS11G0615800	LOC_Os11g40150	GO:0009628	P	response to abiotic stimulus	-1.75814
OS11G0615800	LOC_Os11g40150	GO:0005515	F	protein binding	-1.75814
OS11G0615800	LOC_Os11g40150	GO:0016787	F	hydrolase activity	-1.75814
OS11G0615800	LOC_Os11g40150	GO:0009056	P	catabolic process	-1.75814
OS11G0639100	LOC_Os11g42010	GO:0000166	F	nucleotide binding	8.69621
OS11G0639100	LOC_Os11g42010	GO:0006950	P	response to stress	8.69621
OS11G0655000	LOC_Os11g43404	None	None	None	-3.61814
OS11G0664800	LOC_Os11g44340	GO:0005575	C	cellular_component	5.15675
OS11G0664800	LOC_Os11g44340	GO:0005515	F	protein binding	5.15675
OS11G0664800	LOC_Os11g44340	GO:0008150	P	biological_process	5.15675
OS11G0671000	LOC_Os11g44810	GO:0005575	C	cellular_component	0.775418
OS11G0671000	LOC_Os11g44810	GO:0005575	C	cellular_component	0.775418
OS11G0671000	LOC_Os11g44810	GO:0008150	P	biological_process	0.775418
OS11G0671000	LOC_Os11g44810	GO:0003674	F	molecular_function	0.775418
OS11G0671000	LOC_Os11g44810	GO:0005575	C	cellular_component	0.775418
OS11G0678200	LOC_Os11g45290	None	None	None	-1.68703
OS11G0678301	LOC_Os11g45295	None	None	None	-1.87094
[truncated: 223 more rows]

## Sheet: KHARSUvsIR64
rap	MSU	baseMean	log2FoldChange	lfcSE	pvalue	padj	GO	GO category	function
ENSRNA049464904	None	11.6247	2.92579	0.995386	0.0002668	0.0017738	None	None	None
ENSRNA049465109	None	165.344	6.35273	1.11017	5.21e-10	1.13e-08	None	None	None
ENSRNA049465125	None	165.287	12.7488	3.11652	8.55e-25	7.97e-23	None	None	None
ENSRNA049465687	None	21.3286	5.18599	0.767917	4.57e-12	1.25e-10	None	None	None
ENSRNA049466338	None	342.614	7.57695	0.607034	1.09e-36	2.36e-34	None	None	None
ENSRNA049466512	None	6.53762	7.05265	2.8158	8.56e-06	8.61e-05	None	None	None
ENSRNA049467868	None	20.5156	4.99172	1.00145	6.83e-08	1.06e-06	None	None	None
ENSRNA049468369	None	14.6064	4.84693	1.45343	5.72e-05	0.000467991	None	None	None
ENSRNA049469250	None	6.21086	2.30068	0.906307	0.00136414	0.0071138	None	None	None
ENSRNA049471043	None	14787	4.69131	0.895322	9.26e-09	1.65e-07	None	None	None
ENSRNA049471090	None	178.668	0.259431	0.978801	4.45e-13	1.39e-11	None	None	None
ENSRNA049471707	None	6.96436	6.31137	3.51576	0.00118831	0.0063213	None	None	None
ENSRNA049471772	None	3580.17	5.53808	0.538931	5.83e-26	5.99e-24	None	None	None
ENSRNA049471778	None	6639.26	5.16444	0.851459	7.46e-11	1.79e-09	None	None	None
ENSRNA049472419	None	4.58315	1.3201	3.0168	0.00984352	0.0364097	None	None	None
ENSRNA049472543	None	12.5926	-2.64735	0.723218	3.27e-05	0.000284929	None	None	None
ENSRNA049474050	None	271.858	6.23798	0.513835	4.87e-35	9.69e-33	None	None	None
ENSRNA049474126	None	2.23681	4.55317	2.90938	0.00253647	0.0119059	None	None	None
ENSRNA049475944	None	1061.66	7.85432	0.410924	2e-82	2.32e-79	None	None	None
ENSRNA049476444	None	193.598	6.4161	0.795912	4.66e-17	2.16e-15	None	None	None
ENSRNA049476447	None	61.8827	5.37274	0.964209	1.57e-09	3.17e-08	None	None	None
ENSRNA049476502	None	64.3868	7.69988	2.93279	0.000116138	0.000863044	None	None	None
ENSRNA049476508	None	25.2975	0.252905	0.975683	0.0126824	0.0445073	None	None	None
ENSRNA049476514	None	23.2876	4.81255	1.82058	0.000292402	0.00192161	None	None	None
EPlOSAG00000000169	None	2.83283	5.34887	2.72702	0.000412406	0.00259124	None	None	None
EPlOSAG00000000170	None	2.41931	4.82967	2.82329	0.00143469	0.00740365	None	None	None
EPlOSAG00000000811	None	2.94179	-2.79632	1.79107	0.00666198	0.0265981	None	None	None
EPlOSAG00000001065	None	7.43165	3.20846	1.14133	0.000422169	0.00264325	None	None	None
EPlOSAG00000001076	None	5.40728	4.01632	1.27544	0.000249534	0.00167322	None	None	None
EPlOSAG00000001087	None	2.80163	2.13006	1.31319	0.0119267	0.0424532	None	None	None
EPlOSAG00000001099	None	7.80703	3.17588	2.07835	0.0046428	0.019676	None	None	None
EPlOSAG00000001110	None	11.9477	4.88146	1.0349	4.95e-07	6.61e-06	None	None	None
EPlOSAG00000001121	None	7.70032	4.15606	1.04145	1.16e-05	0.000112533	None	None	None
EPlOSAG00000001365	None	1.67506	3.31565	3.50602	0.0108934	0.0394984	None	None	None
EPlOSAG00000001504	None	12.0665	-7.76531	2.73822	8.86e-09	1.59e-07	None	None	None
EPlOSAG00000001602	None	5.5618	2.15532	1.55304	0.0112717	0.0406421	None	None	None
EPlOSAG00000001753	None	5.5618	2.15532	1.55304	0.0112717	0.0406421	None	None	None
EPlOSAG00000001976	None	3.83554	4.00954	1.71414	0.000624498	0.00368704	None	None	None
EPlOSAG00000002156	None	4.76612	-5.89359	2.64875	4.54e-05	0.000380348	None	None	None
EPlOSAG00000002161	None	1.85178	3.33127	3.8723	0.0114254	0.041082	None	None	None
EPlOSAG00000002279	None	2.08807	-3.52394	2.98577	0.00833827	0.0318397	None	None	None
EPlOSAG00000002498	None	1.67506	3.31565	3.50602	0.0108934	0.0394984	None	None	None
EPlOSAG00000003182	None	6.63972	-2.72054	1.03413	0.000935646	0.00518674	None	None	None
EPlOSAG00000003194	None	10.047	-1.36689	0.670999	0.0101615	0.0373763	None	None	None
EPlOSAG00000003215	None	5.86197	7.02609	2.68304	1.1e-06	1.36e-05	None	None	None
EPlOSAG00000003326	None	4.14018	1.65933	0.951876	0.013408	0.0465776	None	None	None
EPlOSAG00000003370	None	11.4859	2.45173	1.29261	0.00407416	0.0176759	None	None	None
EPlOSAG00000003433	None	9.19259	3.7908	1.32323	0.000304127	0.0019874	None	None	None
EPlOSAG00000003441	None	5.62245	2.75255	1.03388	0.000785357	0.00447648	None	None	None
EPlOSAG00000003507	None	14.8219	-1.75647	0.656428	0.00145133	0.00747578	None	None	None
EPlOSAG00000003861	None	41.2633	10.4823	2.9187	2.69e-16	1.17e-14	None	None	None
EPlOSAG00000003975	None	7.75838	1.46913	0.687452	0.00745072	0.0291521	None	None	None
EPlOSAG00000003986	None	4.16624	5.24093	3.50139	0.00292635	0.0134231	None	None	None
EPlOSAG00000005531	None	13.5494	-5.92409	1.33514	3.62e-08	5.89e-07	None	None	None
EPlOSAG00000005747	None	13.5494	-5.92409	1.33514	3.62e-08	5.89e-07	None	None	None
EPlOSAG00000006199	None	2.54943	1.43628	4.21312	0.0115362	0.0413828	None	None	None
EPlOSAG00000006543	None	37.9019	2.35317	0.489962	2.01e-07	2.9e-06	None	None	None
EPlOSAG00000006911	None	9.73004	7.66611	2.94919	5.62e-06	5.86e-05	None	None	None
EPlOSAG00000006912	None	19.2645	5.57412	1.14555	1.81e-07	2.63e-06	None	None	None
EPlOSAG00000006913	None	18.0051	6.77072	1.58222	1.14e-07	1.71e-06	None	None	None
EPlOSAG00000006914	None	13.1234	5.38988	1.36693	1.1e-05	0.000107134	None	None	None
EPlOSAG00000007169	None	1.96146	2.11865	2.16846	0.0146137	0.049916	None	None	None
EPlOSAG00000007323	None	18.9558	4.9219	1.35278	1.75e-05	0.00016406	None	None	None
EPlOSAG00000007324	None	15.6063	4.40907	0.793061	4.34e-09	8.2e-08	None	None	None
EPlOSAG00000007447	None	3.74673	5.79241	2.8384	0.000296475	0.00194609	None	None	None
EPlOSAG00000007479	None	34.9991	1.07726	0.414323	0.00383616	0.0167993	None	None	None
EPlOSAG00000007851	None	3.41794	5.85335	2.68957	9.95e-05	0.000755054	None	None	None
EPlOSAG00000008023	None	6.63684	2.28579	0.977744	0.00204941	0.00999483	None	None	None
EPlOSAG00000008053	None	37.0539	10.2946	2.9091	2.24e-15	8.8e-14	None	None	None
EPlOSAG00000008064	None	37.0539	10.2946	2.9091	2.24e-15	8.8e-14	None	None	None
EPlOSAG00000008114	None	3.69728	-5.33351	2.64529	0.000239553	0.00161596	None	None	None
EPlOSAG00000008128	None	8.08631	-3.71366	1.08682	9.87e-05	0.000750128	None	None	None
EPlOSAG00000008157	None	4.45278	5.76811	3.11238	0.000862521	0.00484004	None	None	None
EPlOSAG00000008158	None	4.61029	5.70087	3.23585	0.00126667	0.00668843	None	None	None
EPlOSAG00000008202	None	5.99078	1.89224	0.772756	0.00228457	0.0109263	None	None	None
EPlOSAG00000008207	None	12.2183	1.46033	0.503697	0.00102193	0.00557552	None	None	None
EPlOSAG00000008217	None	34.2263	-6.52201	1.01977	8.38e-12	2.21e-10	None	None	None
EPlOSAG00000008218	None	25.9006	1.84003	0.443492	6.39e-06	6.6e-05	None	None	None
EPlOSAG00000008235	None	16.6184	-4.88921	0.926828	3.27e-08	5.38e-07	None	None	None
EPlOSAG00000008413	None	4.32086	-5.70304	2.63935	7.85e-05	0.000616311	None	None	None
EPlOSAG00000008468	None	3.42671	5.82622	2.68773	0.000103026	0.000778464	None	None	None
EPlOSAG00000008492	None	37.0513	3.93902	1.17663	4.24e-05	0.000357637	None	None	None
EPlOSAG00000008496	None	197.849	4.44138	1.99975	0.000617248	0.00365	None	None	None
EPlOSAG00000008501	None	29.3218	9.82433	2.92178	3.5e-12	9.66e-11	None	None	None
EPlOSAG00000008502	None	188.626	2.28848	0.440069	2.7e-08	4.5e-07	None	None	None
EPlOSAG00000008503	None	225.512	5.68994	1.08986	8.46e-09	1.52e-07	None	None	None
EPlOSAG00000008504	None	605.068	4.84397	1.09474	4.67e-07	6.27e-06	None	None	None
EPlOSAG00000008507	None	237.813	4.5584	0.381533	6.1e-34	1.12e-31	None	None	None
EPlOSAG00000008508	None	294.504	4.91764	0.942852	9.73e-09	1.74e-07	None	None	None
EPlOSAG00000008509	None	232.649	13.2812	3.19596	2.6e-24	2.33e-22	None	None	None
EPlOSAG00000008513	None	23.3772	0.688849	1.37966	0.000448765	0.00278335	None	None	None
EPlOSAG00000008514	None	44.0833	0.555523	1.20174	0.000247442	0.00166019	None	None	None
EPlOSAG00000008518	None	57.7732	5.27336	0.953578	2.02e-09	4.03e-08	None	None	None
EPlOSAG00000008519	None	178.606	6.2991	0.787591	7.88e-17	3.61e-15	None	None	None
EPlOSAG00000008528	None	5.02062	3.44721	1.67793	0.00268959	0.0125077	None	None	None
EPlOSAG00000008535	None	4.87461	6.58473	2.71157	1.2e-05	0.000116196	None	None	None
EPlOSAG00000008543	None	130.184	5.65421	1.67838	2.31e-05	0.000210861	None	None	None
EPlOSAG00000008547	None	169912	12.1077	1.80449	6.57e-13	2.01e-11	None	None	None
EPlOSAG00000008548	None	16850.6	4.52322	1.77738	0.000335996	0.00216537	None	None	None
EPlOSAG00000008549	None	19911.8	5.04617	0.754826	1.37e-12	4.01e-11	None	None	None
EPlOSAG00000008550	None	49187.6	5.00082	0.843257	1.86e-10	4.26e-09	None	None	None
EPlOSAG00000008551	None	80029.5	4.71276	1.59601	0.000121048	0.000895771	None	None	None
EPlOSAG00000008552	None	62935.6	7.55209	1.06814	7.86e-14	2.66e-12	None	None	None
EPlOSAG00000008553	None	6.88158	3.12483	1.45989	0.00206082	0.0100432	None	None	None
EPlOSAG00000008554	None	121.274	4.77152	1.21146	3.7e-06	4.05e-05	None	None	None
EPlOSAG00000008558	None	124.813	12.2893	3.08529	3.1e-22	2.27e-20	None	None	None
EPlOSAG00000008560	None	542.246	14.3256	3.64185	1.19e-12	3.54e-11	None	None	None
EPlOSAG00000008561	None	4.83957	5.70952	3.4071	0.0018224	0.00908256	None	None	None
EPlOSAG00000008562	None	66.7391	0.256349	0.977373	4.01e-12	1.1e-10	None	None	None
EPlOSAG00000008564	None	215.89	12.6936	3.65369	5.85e-09	1.08e-07	None	None	None
EPlOSAG00000008565	None	712.14	3.9002	0.86166	3.73e-07	5.08e-06	None	None	None
EPlOSAG00000008567	None	41.9131	4.0962	0.630137	6.73e-12	1.8e-10	None	None	None
EPlOSAG00000008568	None	109.042	7.57846	0.916991	3.09e-17	1.45e-15	None	None	None
EPlOSAG00000008569	None	446.047	8.2769	1.11586	6.35e-15	2.39e-13	None	None	None
EPlOSAG00000008592	None	38.0115	8.1068	1.31322	1.09e-14	4.01e-13	None	None	None
EPlOSAG00000008962	None	6.42236	7.20887	2.66573	2.56e-07	3.61e-06	None	None	None
EPlOSAG00000009004	None	12.0694	-2.71905	0.750574	3.62e-05	0.000311695	None	None	None
EPlOSAG00000009027	None	4.67316	-2.09852	1.63319	0.00889354	0.0334924	None	None	None
EPlOSAG00000009034	None	12.5926	-2.64735	0.723218	3.27e-05	0.000284929	None	None	None
EPlOSAG00000009044	None	24.4635	1.4749	0.681963	0.00669778	0.0267157	None	None	None
EPlOSAG00000009133	None	10.8108	1.87049	0.836944	0.00354904	0.0157615	None	None	None
EPlOSAG00000009637	None	2.63601	2.28077	1.64403	0.0143427	0.0491153	None	None	None
EPlOSAG00000009893	None	14.4529	-1.42828	0.534997	0.00194985	0.00960114	None	None	None
EPlOSAG00000009966	None	2.36984	4.83048	2.80986	0.00140772	0.0072958	None	None	None
EPlOSAG00000010031	None	2.73338	5.25055	2.73503	0.000519773	0.00315174	None	None	None
EPlOSAG00000010431	None	6.56434	7.2289	2.6669	2.3e-07	3.27e-06	None	None	None
EPlOSAG00000010451	None	3.29368	5.55254	2.8213	0.000440546	0.00274046	None	None	None
EPlOSAG00000010604	None	2.0629	4.31997	2.94834	0.00351214	0.0156306	None	None	None
EPlOSAG00000010674	None	20.0441	4.62084	1.0813	1.52e-06	1.83e-05	None	None	None
EPlOSAG00000011131	None	9.12193	-2.14141	0.747068	0.000577081	0.00344152	None	None	None
EPlOSAG00000011224	None	6.08549	6.95775	2.7559	5.15e-06	5.43e-05	None	None	None
EPlOSAG00000011376	None	5.66928	3.03845	1.67139	0.00404345	0.0175653	None	None	None
EPlOSAG00000011469	None	15.821	-8.25163	2.78377	6.49e-10	1.38e-08	None	None	None
EPlOSAG00000011983	None	2.63325	5.05232	2.79252	0.000918022	0.00510719	None	None	None
EPlOSAG00000011996	None	17.4529	2.86751	0.526926	6.33e-09	1.17e-07	None	None	None
EPlOSAG00000012400	None	6.85713	3.60524	1.43545	0.000876685	0.0049097	None	None	None
EPlOSAG00000012767	None	5.11407	4.60134	1.63679	0.000123989	0.000914516	None	None	None
EPlOSAG00000012798	None	4.38513	6.32454	2.75214	4.63e-05	0.000386659	None	None	None
EPlOSAG00000012844	None	2.34286	2.95003	1.85034	0.00470862	0.0199123	None	None	None
EPlOSAG00000012934	None	4.57672	1.60621	0.907185	0.0130875	0.0456719	None	None	None
EPlOSAG00000012955	None	3.75478	4.04556	1.63662	0.000419711	0.0026308	None	None	None
EPlOSAG00000013105	None	62.0508	-1.79728	0.302803	5.04e-10	1.09e-08	None	None	None
EPlOSAG00000013243	None	58.3172	-1.4054	0.668539	0.00825536	0.0315912	None	None	None
EPlOSAG00000013310	None	12.5645	2.54307	0.926379	0.000563841	0.00337632	None	None	None
EPlOSAG00000013385	None	3.67858	-3.37937	1.67053	0.00216271	0.0104429	None	None	None
EPlOSAG00000013406	None	12.4445	-5.78156	1.37477	1.79e-07	2.6e-06	None	None	None
EPlOSAG00000013467	None	3.47426	2.13032	1.59211	0.0142388	0.0488286	None	None	None
EPlOSAG00000014188	None	7.90356	2.49175	0.924758	0.000740254	0.00426127	None	None	None
EPlOSAG00000014457	None	3.2203	-4.87339	2.74736	0.00106499	0.00577488	None	None	None
EPlOSAG00000014866	None	34.4405	-1.30916	0.509035	0.00291037	0.0133608	None	None	None
EPlOSAG00000015123	None	2.57415	-4.36082	2.72882	0.00230515	0.0110028	None	None	None
EPlOSAG00000015367	None	1.98844	4.23891	2.9558	0.00388879	0.017001	None	None	None
EPlOSAG00000016535	None	2.16544	3.56583	3.85481	0.00958504	0.0355827	None	None	None
EPlOSAG00000016604	None	2.98217	-4.79961	2.67041	0.000912311	0.00507878	None	None	None
EPlOSAG00000016612	None	22.1124	-1.77087	0.597961	0.000576362	0.00343845	None	None	None
EPlOSAG00000016654	None	6.89853	2.99325	0.912811	0.000121899	0.000901673	None	None	None
EPlOSAG00000016783	None	5.77127	-2.06916	1.14333	0.00826235	0.0316144	None	None	None
EPlOSAG00000016807	None	2.54827	-4.07443	2.92704	0.00464165	0.0196736	None	None	None
EPlOSAG00000016822	None	6.27835	7.07721	2.69563	1.01e-06	1.27e-05	None	None	None
EPlOSAG00000016824	None	11.9618	8.33131	2.74458	8.61e-10	1.8e-08	None	None	None
EPlOSAG00000016878	None	3.07765	-2.16165	1.37391	0.0113503	0.0408729	None	None	None
EPlOSAG00000016942	None	4.91331	-5.99678	2.63483	2.67e-05	0.000238839	None	None	None
EPlOSAG00000016953	None	4.62337	-5.86772	2.63024	4.09e-05	0.000346413	None	None	None
EPlOSAG00000016971	None	6.97256	2.08341	0.739981	0.00074057	0.00426148	None	None	None
EPlOSAG00000016976	None	4.74979	-5.94672	2.6161	2.58e-05	0.000232054	None	None	None
EPlOSAG00000017020	None	2.4974	-4.24833	2.75919	0.0028918	0.0132864	None	None	None
EPlOSAG00000017113	None	63.9753	1.31281	0.369079	0.000126487	0.000931311	None	None	None
EPlOSAG00000017842	None	14.9152	-2.0281	0.521752	1.8e-05	0.000168048	None	None	None
EPlOSAG00000018038	None	38.3587	0.978997	0.304937	0.000665285	0.00389165	None	None	None
EPlOSAG00000018118	None	1.66792	3.52887	3.23072	0.00877334	0.0331473	None	None	None
EPlOSAG00000018296	None	6.02374	-2.64239	0.953809	0.000754683	0.0043289	None	None	None
EPlOSAG00000018315	None	19.7335	4.51192	1.47825	0.000108662	0.000815234	None	None	None
EPlOSAG00000018356	None	4.7436	-5.92737	2.62768	3.19e-05	0.000279308	None	None	None
EPlOSAG00000018916	None	8.12661	-7.04897	2.65746	1.71e-07	2.49e-06	None	None	None
EPlOSAG00000018941	None	2.16235	4.5397	2.86741	0.0023859	0.0113219	None	None	None
EPlOSAG00000019203	None	2.68175	-4.46033	2.72487	0.00196677	0.00966462	None	None	None
EPlOSAG00000019387	None	2.18898	4.17856	3.16873	0.00506801	0.0211556	None	None	None
EPlOSAG00000019621	None	1.82166	3.1151	4.13843	0.0126542	0.0444178	None	None	None
EPlOSAG00000019843	None	773.055	3.30064	2.85093	0.003868	0.0169299	None	None	None
EPlOSAG00000019866	None	772.285	4.79402	1.13266	1.09e-06	1.35e-05	None	None	None
EPlOSAG00000019966	None	8.51783	7.09481	3.19425	0.00016488	0.0011764	None	None	None
EPlOSAG00000019988	None	17.5843	8.91733	2.88256	2.14e-09	4.24e-08	None	None	None
EPlOSAG00000020010	None	100.495	11.9499	3.04451	3.98e-22	2.89e-20	None	None	None
EPlOSAG00000020032	None	525.028	14.2728	3.63758	1.43e-12	4.17e-11	None	None	None
EPlOSAG00000020066	None	1.9406	4.04759	3.03902	0.00505411	0.0211107	None	None	None
EPlOSAG00000020077	None	1271.46	15.1988	4.27494	3.25e-08	5.36e-07	None	None	None
EPlOSAG00000020088	None	28.0106	0.450758	1.0987	0.00142861	0.00738246	None	None	None
EPlOSAG00000020099	None	156.448	12.637	3.14524	1.34e-21	9.25e-20	None	None	None
EPlOSAG00000020121	None	16.3149	8.61232	3.02663	5.32e-07	7.06e-06	None	None	None
EPlOSAG00000020581	None	5.69232	-3.60213	1.26738	0.000452276	0.00280203	None	None	None
EPlOSAG00000020773	None	5.39993	6.86266	2.65924	1.51e-06	1.82e-05	None	None	None
EPlOSAG00000020872	None	7.61733	-4.91564	1.419	1.02e-05	0.0001003	None	None	None
EPlOSAG00000021027	None	2.54738	3.1832	1.79288	0.00311092	0.0141234	None	None	None
EPlOSAG00000021889	None	3.82814	5.99858	2.72979	8.98e-05	0.000690904	None	None	None
EPlOSAG00000022598	None	3.92813	-2.80887	1.41357	0.00440256	0.0188344	None	None	None
EPlOSAG00000022683	None	4.33212	-5.72615	2.62711	6.48e-05	0.000521469	None	None	None
EPlOSAG00000022694	None	5.32701	-2.38373	0.978654	0.00201053	0.00983658	None	None	None
EPlOSAG00000022813	None	2.57188	-2.33725	1.74021	0.00946567	0.0352368	None	None	None
EPlOSAG00000023192	None	15.0033	-2.57219	1.39472	0.00375899	0.0165173	None	None	None
EPlOSAG00000023231	None	5.72969	-1.76906	0.932964	0.00883201	0.0333278	None	None	None
EPlOSAG00000023280	None	5.42295	-2.41415	0.981292	0.00185159	0.0092008	None	None	None
EPlOSAG00000023306	None	5.32701	-2.38373	0.978654	0.00201053	0.00983658	None	None	None
EPlOSAG00000023403	None	4.5361	2.67204	1.15821	0.00215743	0.0104268	None	None	None
EPlOSAG00000023742	None	120.349	0.433698	1.0838	0.00195222	0.00961138	None	None	None
EPlOSAG00000023746	None	4.72255	5.25354	3.81192	0.00370021	0.0163122	None	None	None
EPlOSAG00000023750	None	127.707	7.00521	0.751161	1.49e-21	1.02e-19	None	None	None
EPlOSAG00000023751	None	26.1862	6.63708	1.17189	6.13e-09	1.13e-07	None	None	None
EPlOSAG00000023752	None	239.86	7.93734	0.770452	1.06e-25	1.07e-23	None	None	None
EPlOSAG00000023753	None	13.8454	6.02769	1.92956	3.51e-05	0.000302901	None	None	None
EPlOSAG00000023754	None	364.965	7.49921	0.617776	6e-35	1.18e-32	None	None	None
EPlOSAG00000023756	None	27.8382	6.56951	1.42484	5.65e-07	7.47e-06	None	None	None
EPlOSAG00000023757	None	5.17032	6.43049	2.85691	7.77e-05	0.00061069	None	None	None
EPlOSAG00000023758	None	11.7537	3.59987	1.18318	0.000152574	0.00109956	None	None	None
EPlOSAG00000023814	None	7.19992	5.279	1.56629	1.25e-05	0.000120062	None	None	None
EPlOSAG00000023815	None	4.41061	4.22692	1.78178	0.000554733	0.00333365	None	None	None
EPlOSAG00000023816	None	3.6595	3.71018	1.91094	0.0017552	0.00878934	None	None	None
EPlOSAG00000023832	None	9.02656	1.79379	1.01751	0.00973808	0.0360593	None	None	None
EPlOSAG00000023915	None	3.25025	3.63553	1.75545	0.00135807	0.00709092	None	None	None
EPlOSAG00000023916	None	2.92928	5.2067	2.88954	0.00103318	0.00562777	None	None	None
EPlOSAG00000023931	None	13.0933	-2.54944	0.732418	4.97e-05	0.000412199	None	None	None
EPlOSAG00000024322	None	3.69763	2.03089	1.01906	0.00631632	0.0254689	None	None	None
EPlOSAG00000024638	None	725.122	-0.525877	0.181163	0.00302965	0.0138085	None	None	None
EPlOSAG00000024648	None	26.7654	1.41729	0.531445	0.00207886	0.010115	None	None	None
EPlOSAG00000024837	None	7.50129	-1.56917	0.718016	0.00654582	0.0262371	None	None	None
EPlOSAG00000024879	None	8.31287	-2.0534	0.857566	0.00250508	0.0117832	None	None	None
EPlOSAG00000025446	None	11.1714	4.48906	0.866909	5.66e-08	8.95e-07	None	None	None
EPlOSAG00000025540	None	5.69523	0.709016	1.39006	0.00665156	0.0265676	None	None	None
EPlOSAG00000025671	None	2.05414	4.1633	3.1202	0.00512291	0.0213318	None	None	None
EPlOSAG00000026003	None	80.665	1.3681	0.400125	0.000189514	0.00132353	None	None	None
EPlOSAG00000026138	None	30.5928	1.51593	0.324649	8.59e-07	1.09e-05	None	None	None
EPlOSAG00000026650	None	5.89947	2.42157	0.925635	0.00105767	0.00574074	None	None	None
EPlOSAG00000026652	None	6.21086	2.30068	0.906307	0.00136414	0.0071138	None	None	None
EPlOSAG00000028070	None	3.50735	1.78445	1.08879	0.0140038	0.04817	None	None	None
EPlOSAG00000028184	None	2.76868	4.17461	3.88278	0.00732455	0.0287621	None	None	None
EPlOSAG00000028254	None	61.0204	5.46095	1.18836	2.14e-07	3.07e-06	None	None	None
EPlOSAG00000028665	None	8.29834	-7.06488	2.67992	2.76e-07	3.86e-06	None	None	None
EPlOSAG00000028767	None	8.19354	-4.29536	1.15322	2.19e-05	0.000201034	None	None	None
EPlOSAG00000029872	None	1.7417	3.31421	3.52535	0.0106166	0.038703	None	None	None
EPlOSAG00000030410	None	3.48052	-3.3944	1.61315	0.00195953	0.00963186	None	None	None
EPlOSAG00000030511	None	14.1435	1.4197	0.672064	0.00827333	0.031642	None	None	None
EPlOSAG00000030622	None	20.4157	1.62165	0.970416	0.013909	0.047932	None	None	None
EPlOSAG00000031212	None	12.3223	-1.37886	0.550114	0.00328687	0.0147589	None	None	None
EPlOSAG00000031627	None	3.48052	-3.3944	1.61315	0.00195953	0.00963186	None	None	None
EPlOSAG00000031844	None	4.98302	1.94492	1.03119	0.00735559	0.0288537	None	None	None
EPlOSAG00000032177	None	10.6429	2.32937	0.721616	0.000161827	0.00115781	None	None	None
EPlOSAG00000032647	None	2.66723	5.07771	2.88567	0.00129172	0.00679404	None	None	None
EPlOSAG00000032802	None	18.7116	-5.05199	0.955592	2.6e-08	4.34e-07	None	None	None
EPlOSAG00000032837	None	2.66723	5.07771	2.88567	0.00129172	0.00679404	None	None	None
EPlOSAG00000033774	None	11.7327	-7.72354	2.7263	7.98e-09	1.44e-07	None	None	None
EPlOSAG00000033831	None	6.46171	1.82543	1.11387	0.0114068	0.0410291	None	None	None
EPlOSAG00000034335	None	3.89215	-5.45197	2.64579	0.000174868	0.00123847	None	None	None
EPlOSAG00000034420	None	1.8778	-3.17057	3.0637	0.0116167	0.0416139	None	None	None
EPlOSAG00000034812	None	11.8295	-7.75185	2.73615	7.31e-09	1.33e-07	None	None	None
EPlOSAG00000034822	None	34.6653	-1.53918	0.784565	0.00892528	0.0335856	None	None	None
EPlOSAG00000034986	None	5.40185	-1.98269	1.08106	0.00866745	0.0328136	None	None	None
EPlOSAG00000035556	None	34.9509	-1.50002	0.785788	0.0104796	0.0383118	None	None	None
EPlOSAG00000035580	None	4.63069	6.55346	2.65964	6.42e-06	6.63e-05	None	None	None
EPlOSAG00000035926	None	5.46235	2.11438	1.55247	0.0120206	0.0426613	None	None	None
EPlOSAG00000036005	None	2.65634	3.01233	1.92575	0.00430571	0.018502	None	None	None
EPlOSAG00000036178	None	4.63069	6.55346	2.65964	6.42e-06	6.63e-05	None	None	None
EPlOSAG00000036399	None	13.3805	2.5027	2.11814	0.00804191	0.0309682	None	None	None
EPlOSAG00000036495	None	3.43316	5.79923	2.70334	0.00012373	0.000912807	None	None	None
EPlOSAG00000036596	None	5.46235	2.11438	1.55247	0.0120206	0.0426613	None	None	None
EPlOSAG00000036693	None	7.03062	-2.24151	1.12678	0.00439217	0.0188034	None	None	None
EPlOSAG00000037619	None	2.51914	-4.15338	2.84207	0.00377749	0.0165812	None	None	None
EPlOSAG00000037865	None	35.0123	1.12632	0.355574	0.00064135	0.00377527	None	None	None
EPlOSAG00000037903	None	4.39923	-2.98111	1.28665	0.00181782	0.00906645	None	None	None
EPlOSAG00000038376	None	70.8067	-1.23502	0.276738	3.17e-06	3.52e-05	None	None	None
EPlOSAG00000038754	None	2.69008	-4.4188	2.75977	0.00228038	0.010914	None	None	None
EPlOSAG00000039489	None	2.51914	-4.15338	2.84207	0.00377749	0.0165812	None	None	None
EPlOSAG00000039696	None	6.10938	6.98959	2.77597	6.47e-06	6.67e-05	None	None	None
EPlOSAG00000040001	None	2.18108	-3.19846	3.41052	0.0122194	0.043239	None	None	None
EPlOSAG00000040107	None	6.10938	6.98959	2.77597	6.47e-06	6.67e-05	None	None	None
EPlOSAG00000040737	None	8.63999	2.48232	1.05114	0.00158348	0.00804924	None	None	None
EPlOSAG00000042918	None	6.72648	1.96744	0.944924	0.00472157	0.0199495	None	None	None
EPlOSAG00000043508	None	6.67636	-6.63314	2.65843	2.17e-06	2.52e-05	None	None	None
EPlOSAG00000043568	None	2.0622	-3.45757	3.01987	0.00901656	0.0338609	None	None	None
EPlOSAG00000044143	None	12.4066	1.64915	0.526564	0.000392153	0.00247931	None	None	None
EPlOSAG00000044472	None	4.40949	-1.98273	1.06948	0.00909606	0.0341024	None	None	None
EPlOSAG00000045176	None	8.02902	3.26913	1.21721	0.00055113	0.00331674	None	None	None
EPlOSAG00000045221	None	11.0045	4.75782	1.01199	5.94e-07	7.78e-06	None	None	None
EPlOSAG00000045243	None	4.54391	4.40762	1.62294	0.000179137	0.00126307	None	None	None
EPlOSAG00000045265	None	7.59677	4.5916	1.24416	4e-05	0.000339777	None	None	None
EPlOSAG00000045287	None	8.3955	2.81494	0.918421	0.000215926	0.00148063	None	None	None
EPlOSAG00000045354	None	11.7376	4.72386	1.21853	1.21e-05	0.000116986	None	None	None
EPlOSAG00000045387	None	23.3942	1.15184	0.491157	0.00688909	0.0273233	None	None	None
EPlOSAG00000045454	None	16.809	5.44642	0.973974	7.3e-09	1.33e-07	None	None	None
EPlOSAG00000045465	None	13.0067	4.55935	1.56967	0.000211753	0.00145498	None	None	None
EPlOSAG00000045543	None	15.0171	3.63973	0.867766	2.38e-06	2.72e-05	None	None	None
EPlOSAG00000045565	None	21.8668	3.98988	0.980687	3.19e-06	3.55e-05	None	None	None
EPlOSAG00000045576	None	23.2653	4.77421	0.79269	2.07e-10	4.71e-09	None	None	None
EPlOSAG00000045598	None	8.57594	3.02524	1.2649	0.00116003	0.00619806	None	None	None
EPlOSAG00000045609	None	14.5772	2.46049	1.11673	0.00213629	0.0103451	None	None	None
EPlOSAG00000045643	None	6.72189	7.07238	2.81795	7.94e-06	8.04e-05	None	None	None
EPlOSAG00000045665	None	12.08	3.23247	0.893888	2.53e-05	0.000228004	None	None	None
EPlOSAG00000045687	None	12.5332	6.15994	1.59904	1.19e-06	1.46e-05	None	None	None
EPlOSAG00000045698	None	2.21165	4.40729	3.02205	0.00360892	0.0159663	None	None	None
EPlOSAG00000045709	None	4.57044	5.99838	3.01022	0.000453604	0.00280819	None	None	None
EPlOSAG00000045765	None	7.43753	2.7178	1.00566	0.000632539	0.00372797	None	None	None
EPlOSAG00000045787	None	7.00976	5.22331	1.56346	1.4e-05	0.000133228	None	None	None
EPlOSAG00000045809	None	1.89063	3.10938	4.13497	0.0122343	0.0432828	None	None	None
EPlOSAG00000045820	None	9.44208	3.34888	1.02011	8.29e-05	0.000644409	None	None	None
EPlOSAG00000045831	None	3.79447	4.06716	1.65493	0.000441613	0.00274507	None	None	None
EPlOSAG00000045842	None	12.5124	8.37643	2.76656	1.49e-09	3.03e-08	None	None	None
EPlOSAG00000045898	None	16.4835	2.17092	0.79539	0.000740736	0.00426148	None	None	None
EPlOSAG00000045942	None	2.94518	5.32526	2.79045	0.000574431	0.00342996	None	None	None
EPlOSAG00000045966	None	3.04463	5.46617	2.74542	0.000351676	0.00225648	None	None	None
EPlOSAG00000045977	None	2.93309	3.26363	1.94642	0.00345335	0.0154036	None	None	None
EPlOSAG00000046032	None	6.09847	4.15947	1.34714	0.000259315	0.0017295	None	None	None
EPlOSAG00000046054	None	4.29864	2.10744	1.19152	0.00802995	0.0309292	None	None	None
EPlOSAG00000046057	None	8.51739	7.75801	2.6797	8.25e-09	1.49e-07	None	None	None
EPlOSAG00000046077	None	4.90326	2.11051	3.26257	0.0141888	0.0486919	None	None	None
EPlOSAG00000046099	None	6.99715	4.40876	1.33168	0.000127895	0.000939416	None	None	None
EPlOSAG00000046110	None	25.0106	4.90942	0.769697	2.53e-11	6.37e-10	None	None	None
EPlOSAG00000046165	None	5.48235	2.81563	5.254	0.00680517	0.0270542	None	None	None
EPlOSAG00000046176	None	4.2701	3.38124	2.55456	0.0046655	0.0197573	None	None	None
EPlOSAG00000046210	None	7.90085	5.56088	1.43889	9.79e-07	1.23e-05	None	None	None
EPlOSAG00000046254	None	2.71999	2.90676	2.14149	0.00625647	0.025267	None	None	None
EPlOSAG00000046321	None	12.7732	5.46146	1.23951	2.3e-06	2.65e-05	None	None	None
EPlOSAG00000046332	None	4.27554	3.24135	1.62995	0.00358868	0.0158977	None	None	None
EPlOSAG00000046343	None	10.6643	5.96314	1.52705	8.47e-07	1.08e-05	None	None	None
EPlOSAG00000046354	None	1.93965	4.15597	3.0399	0.00483714	0.0203662	None	None	None
EPlOSAG00000046365	None	9.52509	5.73838	1.57776	3.53e-06	3.88e-05	None	None	None
EPlOSAG00000046387	None	1.66792	3.52887	3.23072	0.00877334	0.0331473	None	None	None
EPlOSAG00000046421	None	5.14624	6.70333	2.67663	4.23e-06	4.56e-05	None	None	None
EPlOSAG00000046454	None	13.761	4.05927	1.01286	5.41e-06	5.68e-05	None	None	None
EPlOSAG00000046465	None	8.25266	7.46355	2.84072	2.48e-06	2.82e-05	None	None	None
EPlOSAG00000046487	None	6.62442	3.25529	1.27263	0.000844294	0.00475127	None	None	None
EPlOSAG00000046498	None	1.97204	3.97026	3.1443	0.00590545	0.0240777	None	None	None
EPlOSAG00000046665	None	2.62466	5.05362	2.79397	0.000925636	0.00514105	None	None	None
EPlOSAG00000046676	None	4.58111	3.53551	1.45354	0.00148295	0.00761413	None	None	None
EPlOSAG00000046687	None	3.09237	3.70536	1.65972	0.000927977	0.0051499	None	None	None
EPlOSAG00000046698	None	9.90876	5.98843	1.38366	5.89e-08	9.28e-07	None	None	None
EPlOSAG00000046731	None	3.39872	5.73446	2.72975	0.00017826	0.00125878	None	None	None
EPlOSAG00000046743	None	3.68103	4.60473	4.00283	0.00577496	0.0236316	None	None	None
EPlOSAG00000046754	None	2.31891	4.76505	2.86062	0.00181913	0.00907166	None	None	None
EPlOSAG00000046798	None	8.34292	4.80311	1.21789	1.69e-05	0.00015878	None	None	None
EPlOSAG00000046809	None	5.30751	3.32871	1.9069	0.00433103	0.0185818	None	None	None
EPlOSAG00000046842	None	6.67781	4.40375	1.27264	8.92e-05	0.000686512	None	None	None
EPlOSAG00000046965	None	1.76737	3.81056	3.09891	0.00664523	0.0265525	None	None	None
EPlOSAG00000046976	None	11.9043	5.78973	1.91071	5.07e-05	0.00041975	None	None	None
EPlOSAG00000046987	None	10.9752	5.91257	1.6514	4.89e-06	5.18e-05	None	None	None
EPlOSAG00000046998	None	6.9683	4.84777	1.98153	0.000398236	0.00251163	None	None	None
EPlOSAG00000047009	None	2.09529	2.17695	2.2151	0.0135875	0.0470459	None	None	None
EPlOSAG00000047462	None	2.8008	-4.39414	2.8516	0.00285421	0.0131478	None	None	None
EPlOSAG00000047686	None	439.798	3.71796	0.260136	1.98e-47	7.17e-45	None	None	None
EPlOSAG00000047829	None	3.11193	-4.59684	2.88339	0.00233573	0.0111298	None	None	None
EPlOSAG00000047842	None	11.0303	4.27924	1.07334	7.35e-06	7.49e-05	None	None	None
EPlOSAG00000048068	None	2.0714	-3.59649	2.91219	0.00742772	0.0290756	None	None	None
EPlOSAG00000048557	None	2.32417	2.49863	2.21509	0.00996538	0.0367795	None	None	None
EPlOSAG00000048841	None	4.52129	6.46906	2.66418	9.5e-06	9.43e-05	None	None	None
EPlOSAG00000048905	None	3.74009	6.05512	2.65827	3.9e-05	0.000332382	None	None	None
EPlOSAG00000049092	None	4.03131	3.54658	1.29994	0.0009081	0.00506036	None	None	None
EPlOSAG00000049209	None	9.25344	-1.73152	0.90515	0.00865645	0.032783	None	None	None
EPlOSAG00000049343	None	461.591	0.980571	0.409966	0.00797723	0.0307719	None	None	None
EPlOSAG00000049543	None	4.35306	1.6426	0.895605	0.0120442	0.0427152	None	None	None
EPlOSAG00000049573	None	31.2228	-1.02877	0.334977	0.00105588	0.00573289	None	None	None
EPlOSAG00000049606	None	101.987	-1.09284	0.291073	7.34e-05	0.000580592	None	None	None
EPlOSAG00000049654	None	116.663	-1.01842	0.226891	3.55e-06	3.9e-05	None	None	None
EPlOSAG00000050096	None	29.6948	-3.53599	0.540803	1.61e-11	4.14e-10	None	None	None
EPlOSAG00000050136	None	6.94336	-2.00607	0.918203	0.00335774	0.015031	None	None	None
EPlOSAG00000050172	None	6.94336	-2.00607	0.918203	0.00335774	0.015031	None	None	None
EPlOSAG00000050286	None	3.78271	5.76188	2.84156	0.00030862	0.00201402	None	None	None
EPlOSAG00000050364	None	5.98904	6.92056	2.75856	6.2e-06	6.42e-05	None	None	None
EPlOSAG00000050386	None	3.23389	3.7942	1.70281	0.000945317	0.00522963	None	None	None
EPlOSAG00000050409	None	8.63342	3.13337	0.872498	3.56e-05	0.000306692	None	None	None
EPlOSAG00000050410	None	13.9811	6.41115	1.50842	1.16e-07	1.74e-06	None	None	None
EPlOSAG00000050454	None	11.0147	4.49917	1.33605	6.3e-05	0.000509865	None	None	None
EPlOSAG00000050793	None	2.90334	5.33167	2.81647	0.00066941	0.00390966	None	None	None
EPlOSAG00000051036	None	7.11969	7.25308	2.77326	1.96e-06	2.29e-05	None	None	None
EPlOSAG00000051075	None	54.119	-0.858306	0.268228	0.000784069	0.00447274	None	None	None
EPlOSAG00000051081	None	235.426	-2.80555	0.190128	4.99e-50	1.95e-47	None	None	None
EPlOSAG00000051128	None	31.12	1.0401	0.409482	0.00495635	0.0207823	None	None	None
EPlOSAG00000051129	None	18.7459	1.68056	0.73754	0.00395208	0.0172351	None	None	None
EPlOSAG00000051166	None	3.87095	1.93676	1.16063	0.0112899	0.0406948	None	None	None
EPlOSAG00000051171	None	21.6108	1.54236	0.605769	0.0024028	0.0113817	None	None	None
EPlOSAG00000051180	None	3.77374	2.10511	1.32817	0.0109408	0.0396489	None	None	None
EPlOSAG00000051309	None	9.69053	5.68834	1.64727	8.52e-06	8.57e-05	None	None	None
EPlOSAG00000051353	None	3.03599	2.40671	1.78988	0.0128627	0.045018	None	None	None
EPlOSAG00000051466	None	3.384	-4.94939	2.77078	0.00100934	0.00551756	None	None	None
EPlOSAG00000051531	None	21.0238	-6.62351	1.32861	6.94e-10	1.47e-08	None	None	None
EPlOSAG00000052116	None	18.2714	-6.42044	1.3219	1.9e-09	3.8e-08	None	None	None
EPlOSAG00000052524	None	4.04148	4.82282	3.97792	0.0051341	0.0213705	None	None	None
EPlOSAG00000052670	None	3.05671	5.55158	2.7219	0.000264313	0.00176074	None	None	None
EPlOSAG00000052681	None	3.45572	-5.14023	2.67411	0.000455686	0.00282004	None	None	None
EPlOSAG00000052702	None	10.4306	1.23267	0.521384	0.00596248	0.024272	None	None	None
EPlOSAG00000053115	None	56.1498	-2.21896	0.478463	5.92e-07	7.77e-06	None	None	None
EPlOSAG00000053143	None	2.73365	4.7845	3.03386	0.00235192	0.0111943	None	None	None
EPlOSAG00000053168	None	1.98689	2.38152	2.03667	0.010921	0.0395854	None	None	None
EPlOSAG00000053254	None	2.19729	4.56234	2.9347	0.00275797	0.0127762	None	None	None
OS01G0100700	LOC_Os01g01060	7831.65	-0.479588	0.133045	0.00023328	0.0015803	GO:0005840	C	ribosome
OS01G0100700	LOC_Os01g01060	7831.65	-0.479588	0.133045	0.00023328	0.0015803	GO:0016020	C	membrane
OS01G0100700	LOC_Os01g01060	7831.65	-0.479588	0.133045	0.00023328	0.0015803	GO:0005575	C	cellular_component
OS01G0100700	LOC_Os01g01060	7831.65	-0.479588	0.133045	0.00023328	0.0015803	GO:0005773	C	vacuole
OS01G0100700	LOC_Os01g01060	7831.65	-0.479588	0.133045	0.00023328	0.0015803	GO:0005618	C	cell wall
OS01G0100700	LOC_Os01g01060	7831.65	-0.479588	0.133045	0.00023328	0.0015803	GO:0005829	C	cytosol
OS01G0100700	LOC_Os01g01060	7831.65	-0.479588	0.133045	0.00023328	0.0015803	GO:0006412	P	translation
OS01G0100700	LOC_Os01g01060	7831.65	-0.479588	0.133045	0.00023328	0.0015803	GO:0005198	F	structural molecule activity
OS01G0100700	LOC_Os01g01060	7831.65	-0.479588	0.133045	0.00023328	0.0015803	GO:0005886	C	plasma membrane
OS01G0100700	LOC_Os01g01060	7831.65	-0.479588	0.133045	0.00023328	0.0015803	GO:0009536	C	plastid
OS01G0100800	LOC_Os01g01070	379.284	-1.02932	0.140136	1.09e-13	3.64e-12	GO:0005623	C	cell
OS01G0100800	LOC_Os01g01070	379.284	-1.02932	0.140136	1.09e-13	3.64e-12	GO:0003674	F	molecular_function
OS01G0100800	LOC_Os01g01070	379.284	-1.02932	0.140136	1.09e-13	3.64e-12	GO:0008150	P	biological_process
OS01G0100800	LOC_Os01g01070	379.284	-1.02932	0.140136	1.09e-13	3.64e-12	GO:0005623	C	cell
OS01G0100800	LOC_Os01g01070	379.284	-1.02932	0.140136	1.09e-13	3.64e-12	GO:0003674	F	molecular_function
OS01G0100800	LOC_Os01g01070	379.284	-1.02932	0.140136	1.09e-13	3.64e-12	GO:0008150	P	biological_process
OS01G0100800	LOC_Os01g01070	379.284	-1.02932	0.140136	1.09e-13	3.64e-12	GO:0005623	C	cell
OS01G0100800	LOC_Os01g01070	379.284	-1.02932	0.140136	1.09e-13	3.64e-12	GO:0003674	F	molecular_function
OS01G0100800	LOC_Os01g01070	379.284	-1.02932	0.140136	1.09e-13	3.64e-12	GO:0008150	P	biological_process
OS01G0101300	LOC_Os01g01130	323.178	-0.40297	0.163123	0.0119403	0.0424747	None	None	None
OS01G0101700	LOC_Os01g01160	68.1187	0.602109	0.226041	0.00595469	0.0242491	GO:0019538	P	protein metabolic process
OS01G0101700	LOC_Os01g01160	68.1187	0.602109	0.226041	0.00595469	0.0242491	GO:0009987	P	cellular process
OS01G0101700	LOC_Os01g01160	68.1187	0.602109	0.226041	0.00595469	0.0242491	GO:0005634	C	nucleus
OS01G0101700	LOC_Os01g01160	68.1187	0.602109	0.226041	0.00595469	0.0242491	GO:0005515	F	protein binding
OS01G0101700	LOC_Os01g01160	68.1187	0.602109	0.226041	0.00595469	0.0242491	GO:0006950	P	response to stress
OS01G0103000	LOC_Os01g01350	776.928	-0.694001	0.117018	2.23e-09	4.42e-08	GO:0006810	P	transport
OS01G0103000	LOC_Os01g01350	776.928	-0.694001	0.117018	2.23e-09	4.42e-08	GO:0009987	P	cellular process
OS01G0103000	LOC_Os01g01350	776.928	-0.694001	0.117018	2.23e-09	4.42e-08	GO:0006810	P	transport
OS01G0103000	LOC_Os01g01350	776.928	-0.694001	0.117018	2.23e-09	4.42e-08	GO:0009987	P	cellular process
OS01G0103050	None	85.6914	-0.689043	0.202481	0.000474513	0.0029167	None	None	None
OS01G0103400	None	48.6834	-10.2232	2.97066	3.21e-16	1.38e-14	None	None	None
OS01G0103800	LOC_Os01g01390	1173.42	-0.264516	0.104488	0.0107965	0.0392352	GO:0003674	F	molecular_function
OS01G0103800	LOC_Os01g01390	1173.42	-0.264516	0.104488	0.0107965	0.0392352	GO:0008150	P	biological_process
OS01G0103800	LOC_Os01g01390	1173.42	-0.264516	0.104488	0.0107965	0.0392352	GO:0005886	C	plasma membrane
OS01G0103800	LOC_Os01g01390	1173.42	-0.264516	0.104488	0.0107965	0.0392352	GO:0003674	F	molecular_function
OS01G0103800	LOC_Os01g01390	1173.42	-0.264516	0.104488	0.0107965	0.0392352	GO:0008150	P	biological_process
OS01G0103800	LOC_Os01g01390	1173.42	-0.264516	0.104488	0.0107965	0.0392352	GO:0005886	C	plasma membrane
OS01G0103800	LOC_Os01g01390	1173.42	-0.264516	0.104488	0.0107965	0.0392352	GO:0003674	F	molecular_function
OS01G0103800	LOC_Os01g01390	1173.42	-0.264516	0.104488	0.0107965	0.0392352	GO:0008150	P	biological_process
OS01G0103800	LOC_Os01g01390	1173.42	-0.264516	0.104488	0.0107965	0.0392352	GO:0005886	C	plasma membrane
OS01G0103800	LOC_Os01g01390	1173.42	-0.264516	0.104488	0.0107965	0.0392352	GO:0003674	F	molecular_function
OS01G0103800	LOC_Os01g01390	1173.42	-0.264516	0.104488	0.0107965	0.0392352	GO:0008150	P	biological_process
OS01G0103800	LOC_Os01g01390	1173.42	-0.264516	0.104488	0.0107965	0.0392352	GO:0005886	C	plasma membrane
OS01G0103900	LOC_Os01g01400	83.6245	-0.946485	0.377126	0.0060162	0.0244493	GO:0003674	F	molecular_function
OS01G0103900	LOC_Os01g01400	83.6245	-0.946485	0.377126	0.0060162	0.0244493	GO:0005575	C	cellular_component
OS01G0103900	LOC_Os01g01400	83.6245	-0.946485	0.377126	0.0060162	0.0244493	GO:0008150	P	biological_process
OS01G0104800	LOC_Os01g01510	1796.34	-0.840722	0.182869	2.58e-06	2.93e-05	GO:0003674	F	molecular_function
OS01G0104800	LOC_Os01g01510	1796.34	-0.840722	0.182869	2.58e-06	2.93e-05	GO:0005634	C	nucleus
OS01G0104800	LOC_Os01g01510	1796.34	-0.840722	0.182869	2.58e-06	2.93e-05	GO:0008152	P	metabolic process
OS01G0104800	LOC_Os01g01510	1796.34	-0.840722	0.182869	2.58e-06	2.93e-05	GO:0009987	P	cellular process
OS01G0104800	LOC_Os01g01510	1796.34	-0.840722	0.182869	2.58e-06	2.93e-05	GO:0003674	F	molecular_function
OS01G0104800	LOC_Os01g01510	1796.34	-0.840722	0.182869	2.58e-06	2.93e-05	GO:0005634	C	nucleus
OS01G0104800	LOC_Os01g01510	1796.34	-0.840722	0.182869	2.58e-06	2.93e-05	GO:0008152	P	metabolic process
OS01G0104800	LOC_Os01g01510	1796.34	-0.840722	0.182869	2.58e-06	2.93e-05	GO:0009987	P	cellular process
OS01G0105300	LOC_Os01g01560	16.1147	-2.19543	0.619582	7.04e-05	0.000561063	None	None	None
OS01G0105400	LOC_Os01g01570	674.887	-0.367726	0.145206	0.0102989	0.0377907	None	None	None
OS01G0105700	LOC_Os01g01600	125.994	-2.18079	0.250582	5.64e-19	3.1e-17	GO:0005634	C	nucleus
OS01G0105700	LOC_Os01g01600	125.994	-2.18079	0.250582	5.64e-19	3.1e-17	GO:0009058	P	biosynthetic process
OS01G0105700	LOC_Os01g01600	125.994	-2.18079	0.250582	5.64e-19	3.1e-17	GO:0006139	P	nucleobase, nucleoside, nucleotide and nucleic acid metabolic process
OS01G0105700	LOC_Os01g01600	125.994	-2.18079	0.250582	5.64e-19	3.1e-17	GO:0003700	F	sequence-specific DNA binding transcription factor activity
OS01G0106600	LOC_Os01g01680	130.927	0.795658	0.297227	0.00462799	0.0196207	GO:0003824	F	catalytic activity
OS01G0106600	LOC_Os01g01680	130.927	0.795658	0.297227	0.00462799	0.0196207	GO:0008152	P	metabolic process
OS01G0106600	LOC_Os01g01680	130.927	0.795658	0.297227	0.00462799	0.0196207	GO:0009536	C	plastid
OS01G0106900	LOC_Os01g01710	1322.13	-0.482931	0.165511	0.00295904	0.0135509	GO:0009058	P	biosynthetic process
OS01G0106900	LOC_Os01g01710	1322.13	-0.482931	0.165511	0.00295904	0.0135509	GO:0009987	P	cellular process
OS01G0106900	LOC_Os01g01710	1322.13	-0.482931	0.165511	0.00295904	0.0135509	GO:0006629	P	lipid metabolic process
OS01G0106900	LOC_Os01g01710	1322.13	-0.482931	0.165511	0.00295904	0.0135509	GO:0008150	P	biological_process
OS01G0106900	LOC_Os01g01710	1322.13	-0.482931	0.165511	0.00295904	0.0135509	GO:0008152	P	metabolic process
OS01G0106900	LOC_Os01g01710	1322.13	-0.482931	0.165511	0.00295904	0.0135509	GO:0005975	P	carbohydrate metabolic process
OS01G0106900	LOC_Os01g01710	1322.13	-0.482931	0.165511	0.00295904	0.0135509	GO:0003824	F	catalytic activity
OS01G0106900	LOC_Os01g01710	1322.13	-0.482931	0.165511	0.00295904	0.0135509	GO:0009536	C	plastid
OS01G0106900	LOC_Os01g01710	1322.13	-0.482931	0.165511	0.00295904	0.0135509	GO:0009058	P	biosynthetic process
OS01G0106900	LOC_Os01g01710	1322.13	-0.482931	0.165511	0.00295904	0.0135509	GO:0009987	P	cellular process
OS01G0106900	LOC_Os01g01710	1322.13	-0.482931	0.165511	0.00295904	0.0135509	GO:0006629	P	lipid metabolic process
OS01G0106900	LOC_Os01g01710	1322.13	-0.482931	0.165511	0.00295904	0.0135509	GO:0008150	P	biological_process
OS01G0106900	LOC_Os01g01710	1322.13	-0.482931	0.165511	0.00295904	0.0135509	GO:0008152	P	metabolic process
OS01G0106900	LOC_Os01g01710	1322.13	-0.482931	0.165511	0.00295904	0.0135509	GO:0005975	P	carbohydrate metabolic process
OS01G0106900	LOC_Os01g01710	1322.13	-0.482931	0.165511	0.00295904	0.0135509	GO:0003824	F	catalytic activity
OS01G0106900	LOC_Os01g01710	1322.13	-0.482931	0.165511	0.00295904	0.0135509	GO:0009536	C	plastid
OS01G0108200	LOC_Os01g01830	2123.27	-0.402936	0.124708	0.00112282	0.00603109	GO:0016787	F	hydrolase activity
OS01G0108200	LOC_Os01g01830	2123.27	-0.402936	0.124708	0.00112282	0.00603109	GO:0019538	P	protein metabolic process
OS01G0108200	LOC_Os01g01830	2123.27	-0.402936	0.124708	0.00112282	0.00603109	GO:0009536	C	plastid
OS01G0108600	LOC_Os01g01870	551.241	-0.960522	0.36574	0.00425316	0.0182991	GO:0005634	C	nucleus
OS01G0108600	LOC_Os01g01870	551.241	-0.960522	0.36574	0.00425316	0.0182991	GO:0009058	P	biosynthetic process
OS01G0108600	LOC_Os01g01870	551.241	-0.960522	0.36574	0.00425316	0.0182991	GO:0006139	P	nucleobase, nucleoside, nucleotide and nucleic acid metabolic process
OS01G0108600	LOC_Os01g01870	551.241	-0.960522	0.36574	0.00425316	0.0182991	GO:0003700	F	sequence-specific DNA binding transcription factor activity
OS01G0108600	LOC_Os01g01870	551.241	-0.960522	0.36574	0.00425316	0.0182991	GO:0005737	C	cytoplasm
OS01G0109000	None	128.203	-0.862149	0.306937	0.00278149	0.0128728	None	None	None
OS01G0110200	LOC_Os01g02010	48.482	2.85355	0.959361	0.000215294	0.0014769	None	None	None
OS01G0110400	LOC_Os01g02020	3171.84	0.285734	0.113841	0.011343	0.0408555	GO:0005575	C	cellular_component
OS01G0110400	LOC_Os01g02020	3171.84	0.285734	0.113841	0.011343	0.0408555	GO:0008152	P	metabolic process
OS01G0110400	LOC_Os01g02020	3171.84	0.285734	0.113841	0.011343	0.0408555	GO:0016740	F	transferase activity
OS01G0110400	LOC_Os01g02020	3171.84	0.285734	0.113841	0.011343	0.0408555	GO:0003824	F	catalytic activity
OS01G0110400	LOC_Os01g02020	3171.84	0.285734	0.113841	0.011343	0.0408555	GO:0005575	C	cellular_component
OS01G0110400	LOC_Os01g02020	3171.84	0.285734	0.113841	0.011343	0.0408555	GO:0008152	P	metabolic process
OS01G0110400	LOC_Os01g02020	3171.84	0.285734	0.113841	0.011343	0.0408555	GO:0016740	F	transferase activity
OS01G0110400	LOC_Os01g02020	3171.84	0.285734	0.113841	0.011343	0.0408555	GO:0003824	F	catalytic activity
OS01G0111100	LOC_Os01g02080	78.5144	3.03664	0.449345	1.45e-12	4.24e-11	GO:0019538	P	protein metabolic process
OS01G0111100	LOC_Os01g02080	78.5144	3.03664	0.449345	1.45e-12	4.24e-11	GO:0009987	P	cellular process
OS01G0111100	LOC_Os01g02080	78.5144	3.03664	0.449345	1.45e-12	4.24e-11	GO:0003824	F	catalytic activity
OS01G0111100	LOC_Os01g02080	78.5144	3.03664	0.449345	1.45e-12	4.24e-11	GO:0009536	C	plastid
OS01G0111100	LOC_Os01g02080	78.5144	3.03664	0.449345	1.45e-12	4.24e-11	GO:0009579	C	thylakoid
OS01G0111100	LOC_Os01g02080	78.5144	3.03664	0.449345	1.45e-12	4.24e-11	GO:0006464	P	protein modification process
OS01G0111600	LOC_Os01g02120	1215.95	2.15079	0.305949	3.33e-13	1.06e-11	GO:0005634	C	nucleus
OS01G0111600	LOC_Os01g02120	1215.95	2.15079	0.305949	3.33e-13	1.06e-11	GO:0009791	P	post-embryonic development
OS01G0111600	LOC_Os01g02120	1215.95	2.15079	0.305949	3.33e-13	1.06e-11	GO:0008289	F	lipid binding
OS01G0111600	LOC_Os01g02120	1215.95	2.15079	0.305949	3.33e-13	1.06e-11	GO:0009719	P	response to endogenous stimulus
OS01G0111800	LOC_Os01g02139	1907.2	0.691313	0.178977	8.09e-05	0.00063074	None	None	None
OS01G0111900	LOC_Os01g02150	3446.31	0.649575	0.222685	0.00259564	0.0121396	None	None	None
OS01G0112100	LOC_Os01g02170	442.044	-0.814393	0.283691	0.00247558	0.0116673	GO:0003674	F	molecular_function
OS01G0112100	LOC_Os01g02170	442.044	-0.814393	0.283691	0.00247558	0.0116673	GO:0005730	C	nucleolus
OS01G0112100	LOC_Os01g02170	442.044	-0.814393	0.283691	0.00247558	0.0116673	GO:0008150	P	biological_process
OS01G0112100	LOC_Os01g02170	442.044	-0.814393	0.283691	0.00247558	0.0116673	GO:0003674	F	molecular_function
OS01G0112100	LOC_Os01g02170	442.044	-0.814393	0.283691	0.00247558	0.0116673	GO:0005730	C	nucleolus
OS01G0112100	LOC_Os01g02170	442.044	-0.814393	0.283691	0.00247558	0.0116673	GO:0008150	P	biological_process
OS01G0112300	LOC_Os01g02180	828.345	-0.544692	0.12236	6.88e-06	7.06e-05	GO:0003674	F	molecular_function
OS01G0112300	LOC_Os01g02180	828.345	-0.544692	0.12236	6.88e-06	7.06e-05	GO:0005575	C	cellular_component
OS01G0112300	LOC_Os01g02180	828.345	-0.544692	0.12236	6.88e-06	7.06e-05	GO:0008150	P	biological_process
OS01G0112300	LOC_Os01g02180	828.345	-0.544692	0.12236	6.88e-06	7.06e-05	GO:0003674	F	molecular_function
OS01G0112300	LOC_Os01g02180	828.345	-0.544692	0.12236	6.88e-06	7.06e-05	GO:0005575	C	cellular_component
OS01G0112300	LOC_Os01g02180	828.345	-0.544692	0.12236	6.88e-06	7.06e-05	GO:0008150	P	biological_process
OS01G0112500	LOC_Os01g02200	556.485	0.391058	0.142837	0.00558265	0.0229255	GO:0008150	P	biological_process
OS01G0112500	LOC_Os01g02200	556.485	0.391058	0.142837	0.00558265	0.0229255	GO:0005488	F	binding
OS01G0113000	LOC_Os01g02270	23.7513	-2.7803	0.504636	4.88e-09	9.13e-08	None	None	None
OS01G0113300	LOC_Os01g02300	524.093	1.47122	0.244423	5.27e-10	1.14e-08	GO:0005623	C	cell
OS01G0113300	LOC_Os01g02300	524.093	1.47122	0.244423	5.27e-10	1.14e-08	GO:0008152	P	metabolic process
OS01G0113300	LOC_Os01g02300	524.093	1.47122	0.244423	5.27e-10	1.14e-08	GO:0009987	P	cellular process
OS01G0113300	LOC_Os01g02300	524.093	1.47122	0.244423	5.27e-10	1.14e-08	GO:0016301	F	kinase activity
OS01G0113300	LOC_Os01g02300	524.093	1.47122	0.244423	5.27e-10	1.14e-08	GO:0006464	P	protein modification process
OS01G0113325	None	44.3908	1.99364	0.547544	4.09e-05	0.000346553	None	None	None
OS01G0113350	LOC_Os01g02310	11.8272	-1.46703	0.5922	0.00339528	0.0151767	GO:0008152	P	metabolic process
OS01G0113350	LOC_Os01g02310	11.8272	-1.46703	0.5922	0.00339528	0.0151767	GO:0009987	P	cellular process
OS01G0113350	LOC_Os01g02310	11.8272	-1.46703	0.5922	0.00339528	0.0151767	GO:0007165	P	signal transduction
OS01G0113350	LOC_Os01g02310	11.8272	-1.46703	0.5922	0.00339528	0.0151767	GO:0009607	P	response to biotic stimulus
OS01G0113350	LOC_Os01g02310	11.8272	-1.46703	0.5922	0.00339528	0.0151767	GO:0005575	C	cellular_component
OS01G0113350	LOC_Os01g02310	11.8272	-1.46703	0.5922	0.00339528	0.0151767	GO:0016301	F	kinase activity
OS01G0113350	LOC_Os01g02310	11.8272	-1.46703	0.5922	0.00339528	0.0151767	GO:0006464	P	protein modification process
OS01G0113350	LOC_Os01g02310	11.8272	-1.46703	0.5922	0.00339528	0.0151767	GO:0004872	F	receptor activity
OS01G0113350	LOC_Os01g02310	11.8272	-1.46703	0.5922	0.00339528	0.0151767	GO:0004871	F	signal transducer activity
OS01G0113400	LOC_Os01g02320	98.0499	2.56193	0.242755	6.24e-27	6.8e-25	GO:0005975	P	carbohydrate metabolic process
OS01G0113400	LOC_Os01g02320	98.0499	2.56193	0.242755	6.24e-27	6.8e-25	GO:0009987	P	cellular process
OS01G0113400	LOC_Os01g02320	98.0499	2.56193	0.242755	6.24e-27	6.8e-25	GO:0008152	P	metabolic process
OS01G0113400	LOC_Os01g02320	98.0499	2.56193	0.242755	6.24e-27	6.8e-25	GO:0006950	P	response to stress
OS01G0113400	LOC_Os01g02320	98.0499	2.56193	0.242755	6.24e-27	6.8e-25	GO:0016301	F	kinase activity
OS01G0113400	LOC_Os01g02320	98.0499	2.56193	0.242755	6.24e-27	6.8e-25	GO:0016787	F	hydrolase activity
OS01G0113450	None	6.21179	7.08439	2.72104	1.73e-06	2.05e-05	None	None	None
OS01G0113500	None	93.8193	-6.37662	0.621387	3.48e-25	3.34e-23	None	None	None
OS01G0113600	LOC_Os01g02334	336.74	-0.413442	0.167398	0.0119714	0.0425494	None	None	None
OS01G0113700	LOC_Os01g02350	266.624	-1.14723	0.206121	1.09e-08	1.94e-07	GO:0005623	C	cell
OS01G0113700	LOC_Os01g02350	266.624	-1.14723	0.206121	1.09e-08	1.94e-07	GO:0008152	P	metabolic process
OS01G0113700	LOC_Os01g02350	266.624	-1.14723	0.206121	1.09e-08	1.94e-07	GO:0009987	P	cellular process
OS01G0113700	LOC_Os01g02350	266.624	-1.14723	0.206121	1.09e-08	1.94e-07	GO:0016301	F	kinase activity
OS01G0113700	LOC_Os01g02350	266.624	-1.14723	0.206121	1.09e-08	1.94e-07	GO:0000166	F	nucleotide binding
OS01G0113700	LOC_Os01g02350	266.624	-1.14723	0.206121	1.09e-08	1.94e-07	GO:0006464	P	protein modification process
OS01G0113800	LOC_Os01g02360	78.1905	-1.4102	0.291658	3.78e-07	5.14e-06	GO:0005623	C	cell
OS01G0113800	LOC_Os01g02360	78.1905	-1.4102	0.291658	3.78e-07	5.14e-06	GO:0008152	P	metabolic process
OS01G0113800	LOC_Os01g02360	78.1905	-1.4102	0.291658	3.78e-07	5.14e-06	GO:0009987	P	cellular process
OS01G0113800	LOC_Os01g02360	78.1905	-1.4102	0.291658	3.78e-07	5.14e-06	GO:0016301	F	kinase activity
OS01G0113800	LOC_Os01g02360	78.1905	-1.4102	0.291658	3.78e-07	5.14e-06	GO:0000166	F	nucleotide binding
OS01G0113800	LOC_Os01g02360	78.1905	-1.4102	0.291658	3.78e-07	5.14e-06	GO:0006464	P	protein modification process
OS01G0114100	LOC_Os01g02390	531.845	0.587769	0.141449	2.56e-05	0.000230372	GO:0005623	C	cell
OS01G0114100	LOC_Os01g02390	531.845	0.587769	0.141449	2.56e-05	0.000230372	GO:0008152	P	metabolic process
OS01G0114100	LOC_Os01g02390	531.845	0.587769	0.141449	2.56e-05	0.000230372	GO:0009987	P	cellular process
OS01G0114100	LOC_Os01g02390	531.845	0.587769	0.141449	2.56e-05	0.000230372	GO:0016301	F	kinase activity
OS01G0114100	LOC_Os01g02390	531.845	0.587769	0.141449	2.56e-05	0.000230372	GO:0006464	P	protein modification process
OS01G0114100	LOC_Os01g02390	531.845	0.587769	0.141449	2.56e-05	0.000230372	GO:0005623	C	cell
OS01G0114100	LOC_Os01g02390	531.845	0.587769	0.141449	2.56e-05	0.000230372	GO:0008152	P	metabolic process
OS01G0114100	LOC_Os01g02390	531.845	0.587769	0.141449	2.56e-05	0.000230372	GO:0009987	P	cellular process
OS01G0114100	LOC_Os01g02390	531.845	0.587769	0.141449	2.56e-05	0.000230372	GO:0016301	F	kinase activity
OS01G0114100	LOC_Os01g02390	531.845	0.587769	0.141449	2.56e-05	0.000230372	GO:0006464	P	protein modification process
OS01G0114150	None	85.3421	0.877197	0.393748	0.0139602	0.0480543	None	None	None
OS01G0114200	None	100.043	0.625824	0.203188	0.00157115	0.00799851	None	None	None
OS01G0114600	LOC_Os01g02430	61.4937	11.1635	2.96587	1.18e-19	6.77e-18	GO:0005623	C	cell
OS01G0114600	LOC_Os01g02430	61.4937	11.1635	2.96587	1.18e-19	6.77e-18	GO:0008152	P	metabolic process
OS01G0114600	LOC_Os01g02430	61.4937	11.1635	2.96587	1.18e-19	6.77e-18	GO:0009987	P	cellular process
OS01G0114600	LOC_Os01g02430	61.4937	11.1635	2.96587	1.18e-19	6.77e-18	GO:0016301	F	kinase activity
OS01G0114600	LOC_Os01g02430	61.4937	11.1635	2.96587	1.18e-19	6.77e-18	GO:0000166	F	nucleotide binding
OS01G0114600	LOC_Os01g02430	61.4937	11.1635	2.96587	1.18e-19	6.77e-18	GO:0006464	P	protein modification process
OS01G0114650	None	9.07432	7.32356	3.11749	6.87e-05	0.000548458	None	None	None
OS01G0114700	LOC_Os01g02440	23.81	5.35899	0.779828	1.88e-12	5.39e-11	GO:0008152	P	metabolic process
OS01G0114700	LOC_Os01g02440	23.81	5.35899	0.779828	1.88e-12	5.39e-11	GO:0009987	P	cellular process
OS01G0114700	LOC_Os01g02440	23.81	5.35899	0.779828	1.88e-12	5.39e-11	GO:0007165	P	signal transduction
OS01G0114700	LOC_Os01g02440	23.81	5.35899	0.779828	1.88e-12	5.39e-11	GO:0009607	P	response to biotic stimulus
OS01G0114700	LOC_Os01g02440	23.81	5.35899	0.779828	1.88e-12	5.39e-11	GO:0005575	C	cellular_component
OS01G0114700	LOC_Os01g02440	23.81	5.35899	0.779828	1.88e-12	5.39e-11	GO:0016301	F	kinase activity
OS01G0114700	LOC_Os01g02440	23.81	5.35899	0.779828	1.88e-12	5.39e-11	GO:0006464	P	protein modification process
OS01G0114700	LOC_Os01g02440	23.81	5.35899	0.779828	1.88e-12	5.39e-11	GO:0004872	F	receptor activity
OS01G0114700	LOC_Os01g02440	23.81	5.35899	0.779828	1.88e-12	5.39e-11	GO:0004871	F	signal transducer activity
OS01G0114800	LOC_Os01g02450	37.6271	1.044	0.394327	0.00343506	0.0153363	None	None	None
OS01G0115600	LOC_Os01g02560	50.7334	-1.60791	0.275504	1.25e-09	2.56e-08	GO:0005623	C	cell
OS01G0115600	LOC_Os01g02560	50.7334	-1.60791	0.275504	1.25e-09	2.56e-08	GO:0008152	P	metabolic process
OS01G0115600	LOC_Os01g02560	50.7334	-1.60791	0.275504	1.25e-09	2.56e-08	GO:0009987	P	cellular process
OS01G0115600	LOC_Os01g02560	50.7334	-1.60791	0.275504	1.25e-09	2.56e-08	GO:0016301	F	kinase activity
OS01G0115600	LOC_Os01g02560	50.7334	-1.60791	0.275504	1.25e-09	2.56e-08	GO:0000166	F	nucleotide binding
OS01G0115600	LOC_Os01g02560	50.7334	-1.60791	0.275504	1.25e-09	2.56e-08	GO:0006464	P	protein modification process
OS01G0115700	LOC_Os01g02570	12.7271	8.41688	2.76922	1.19e-09	2.46e-08	GO:0005623	C	cell
OS01G0115700	LOC_Os01g02570	12.7271	8.41688	2.76922	1.19e-09	2.46e-08	GO:0008152	P	metabolic process
OS01G0115700	LOC_Os01g02570	12.7271	8.41688	2.76922	1.19e-09	2.46e-08	GO:0009987	P	cellular process
OS01G0115700	LOC_Os01g02570	12.7271	8.41688	2.76922	1.19e-09	2.46e-08	GO:0016301	F	kinase activity
OS01G0115700	LOC_Os01g02570	12.7271	8.41688	2.76922	1.19e-09	2.46e-08	GO:0000166	F	nucleotide binding
OS01G0115700	LOC_Os01g02570	12.7271	8.41688	2.76922	1.19e-09	2.46e-08	GO:0006464	P	protein modification process
OS01G0115725	None	5.71671	0.525079	1.15965	0.0126324	0.044355	None	None	None
OS01G0115750	LOC_Os01g02580	33.7094	6.07669	2.38738	0.000320011	0.00207668	GO:0005623	C	cell
OS01G0115750	LOC_Os01g02580	33.7094	6.07669	2.38738	0.000320011	0.00207668	GO:0008152	P	metabolic process
OS01G0115750	LOC_Os01g02580	33.7094	6.07669	2.38738	0.000320011	0.00207668	GO:0009987	P	cellular process
OS01G0115750	LOC_Os01g02580	33.7094	6.07669	2.38738	0.000320011	0.00207668	GO:0016301	F	kinase activity
OS01G0115750	LOC_Os01g02580	33.7094	6.07669	2.38738	0.000320011	0.00207668	GO:0006464	P	protein modification process
OS01G0115752	None	1.80594	3.58098	3.40202	0.00905931	0.0339911	None	None	None
OS01G0115900	LOC_Os01g02600	64.9123	1.59807	0.308331	5.4e-08	8.56e-07	GO:0005623	C	cell
OS01G0115900	LOC_Os01g02600	64.9123	1.59807	0.308331	5.4e-08	8.56e-07	GO:0008152	P	metabolic process
OS01G0115900	LOC_Os01g02600	64.9123	1.59807	0.308331	5.4e-08	8.56e-07	GO:0009987	P	cellular process
OS01G0115900	LOC_Os01g02600	64.9123	1.59807	0.308331	5.4e-08	8.56e-07	GO:0016301	F	kinase activity
OS01G0115900	LOC_Os01g02600	64.9123	1.59807	0.308331	5.4e-08	8.56e-07	GO:0006464	P	protein modification process
OS01G0116400	LOC_Os01g02700	271.872	-3.11191	0.181422	7.11e-67	4.6e-64	GO:0005623	C	cell
OS01G0116400	LOC_Os01g02700	271.872	-3.11191	0.181422	7.11e-67	4.6e-64	GO:0008152	P	metabolic process
OS01G0116400	LOC_Os01g02700	271.872	-3.11191	0.181422	7.11e-67	4.6e-64	GO:0009987	P	cellular process
OS01G0116400	LOC_Os01g02700	271.872	-3.11191	0.181422	7.11e-67	4.6e-64	GO:0016301	F	kinase activity
OS01G0116400	LOC_Os01g02700	271.872	-3.11191	0.181422	7.11e-67	4.6e-64	GO:0000166	F	nucleotide binding
OS01G0116400	LOC_Os01g02700	271.872	-3.11191	0.181422	7.11e-67	4.6e-64	GO:0006464	P	protein modification process
OS01G0116650	None	29.6145	-9.36226	2.8962	5.96e-13	1.83e-11	None	None	None
OS01G0116800	LOC_Os01g02730	46.4334	2.39547	0.401906	3.61e-10	7.96e-09	GO:0005623	C	cell
OS01G0116800	LOC_Os01g02730	46.4334	2.39547	0.401906	3.61e-10	7.96e-09	GO:0008152	P	metabolic process
OS01G0116800	LOC_Os01g02730	46.4334	2.39547	0.401906	3.61e-10	7.96e-09	GO:0009987	P	cellular process
OS01G0116800	LOC_Os01g02730	46.4334	2.39547	0.401906	3.61e-10	7.96e-09	GO:0016301	F	kinase activity
OS01G0116800	LOC_Os01g02730	46.4334	2.39547	0.401906	3.61e-10	7.96e-09	GO:0006464	P	protein modification process
OS01G0117000	LOC_Os01g02760	12.2603	3.09436	0.738555	3.12e-06	3.48e-05	GO:0005623	C	cell
OS01G0117000	LOC_Os01g02760	12.2603	3.09436	0.738555	3.12e-06	3.48e-05	GO:0008152	P	metabolic process
OS01G0117000	LOC_Os01g02760	12.2603	3.09436	0.738555	3.12e-06	3.48e-05	GO:0009987	P	cellular process
OS01G0117000	LOC_Os01g02760	12.2603	3.09436	0.738555	3.12e-06	3.48e-05	GO:0016301	F	kinase activity
OS01G0117000	LOC_Os01g02760	12.2603	3.09436	0.738555	3.12e-06	3.48e-05	GO:0000166	F	nucleotide binding
OS01G0117000	LOC_Os01g02760	12.2603	3.09436	0.738555	3.12e-06	3.48e-05	GO:0006464	P	protein modification process
OS01G0117025	None	9.17257	2.46548	0.85561	0.000428124	0.00267246	None	None	None
OS01G0117900	LOC_Os01g02870	1678.06	0.683881	0.178826	9.85e-05	0.000749042	GO:0005623	C	cell
OS01G0117900	LOC_Os01g02870	1678.06	0.683881	0.178826	9.85e-05	0.000749042	GO:0003674	F	molecular_function
OS01G0117900	LOC_Os01g02870	1678.06	0.683881	0.178826	9.85e-05	0.000749042	GO:0016020	C	membrane
OS01G0118100	LOC_Os01g02884	1391.63	-0.807269	0.283645	0.00267647	0.0124635	None	None	None
OS01G0118300	LOC_Os01g02890	855.797	-0.856843	0.182233	1.54e-06	1.85e-05	GO:0016740	F	transferase activity
OS01G0118300	LOC_Os01g02890	855.797	-0.856843	0.182233	1.54e-06	1.85e-05	GO:0005634	C	nucleus
OS01G0118300	LOC_Os01g02890	855.797	-0.856843	0.182233	1.54e-06	1.85e-05	GO:0009058	P	biosynthetic process
OS01G0118300	LOC_Os01g02890	855.797	-0.856843	0.182233	1.54e-06	1.85e-05	GO:0009987	P	cellular process
OS01G0118300	LOC_Os01g02890	855.797	-0.856843	0.182233	1.54e-06	1.85e-05	GO:0006629	P	lipid metabolic process
OS01G0118300	LOC_Os01g02890	855.797	-0.856843	0.182233	1.54e-06	1.85e-05	GO:0016020	C	membrane
OS01G0118300	LOC_Os01g02890	855.797	-0.856843	0.182233	1.54e-06	1.85e-05	GO:0005783	C	endoplasmic reticulum
OS01G0118700	LOC_Os01g02920	2212.7	0.536394	0.223572	0.0134132	0.0465909	GO:0005575	C	cellular_component
OS01G0118700	LOC_Os01g02920	2212.7	0.536394	0.223572	0.0134132	0.0465909	GO:0016740	F	transferase activity
OS01G0118700	LOC_Os01g02920	2212.7	0.536394	0.223572	0.0134132	0.0465909	GO:0008152	P	metabolic process
OS01G0118700	LOC_Os01g02920	2212.7	0.536394	0.223572	0.0134132	0.0465909	GO:0008150	P	biological_process
OS01G0119500	LOC_Os01g02960	487.654	-1.19341	0.165969	2.58e-13	8.3e-12	None	None	None
OS01G0119800	None	114.413	-2.75751	0.357753	8.89e-16	3.67e-14	None	None	None
OS01G0120300	LOC_Os01g03020	1636.02	3.84185	0.122706	3.41e-216	2.29e-212	GO:0003824	F	catalytic activity
OS01G0120300	LOC_Os01g03020	1636.02	3.84185	0.122706	3.41e-216	2.29e-212	GO:0008152	P	metabolic process
OS01G0120300	LOC_Os01g03020	1636.02	3.84185	0.122706	3.41e-216	2.29e-212	GO:0000166	F	nucleotide binding
OS01G0120300	LOC_Os01g03020	1636.02	3.84185	0.122706	3.41e-216	2.29e-212	GO:0006412	P	translation
OS01G0120300	LOC_Os01g03020	1636.02	3.84185	0.122706	3.41e-216	2.29e-212	GO:0006139	P	nucleobase, nucleoside, nucleotide and nucleic acid metabolic process
OS01G0120300	LOC_Os01g03020	1636.02	3.84185	0.122706	3.41e-216	2.29e-212	GO:0005739	C	mitochondrion
OS01G0120300	LOC_Os01g03020	1636.02	3.84185	0.122706	3.41e-216	2.29e-212	GO:0000003	P	reproduction
OS01G0120300	LOC_Os01g03020	1636.02	3.84185	0.122706	3.41e-216	2.29e-212	GO:0009791	P	post-embryonic development
OS01G0120300	LOC_Os01g03020	1636.02	3.84185	0.122706	3.41e-216	2.29e-212	GO:0009790	P	embryo development
OS01G0120300	LOC_Os01g03020	1636.02	3.84185	0.122706	3.41e-216	2.29e-212	GO:0009536	C	plastid
OS01G0120300	LOC_Os01g03020	1636.02	3.84185	0.122706	3.41e-216	2.29e-212	GO:0003824	F	catalytic activity
OS01G0120300	LOC_Os01g03020	1636.02	3.84185	0.122706	3.41e-216	2.29e-212	GO:0008152	P	metabolic process
OS01G0120300	LOC_Os01g03020	1636.02	3.84185	0.122706	3.41e-216	2.29e-212	GO:0000166	F	nucleotide binding
OS01G0120300	LOC_Os01g03020	1636.02	3.84185	0.122706	3.41e-216	2.29e-212	GO:0006412	P	translation
OS01G0120300	LOC_Os01g03020	1636.02	3.84185	0.122706	3.41e-216	2.29e-212	GO:0006139	P	nucleobase, nucleoside, nucleotide and nucleic acid metabolic process
OS01G0120300	LOC_Os01g03020	1636.02	3.84185	0.122706	3.41e-216	2.29e-212	GO:0005739	C	mitochondrion
OS01G0120300	LOC_Os01g03020	1636.02	3.84185	0.122706	3.41e-216	2.29e-212	GO:0000003	P	reproduction
OS01G0120300	LOC_Os01g03020	1636.02	3.84185	0.122706	3.41e-216	2.29e-212	GO:0009791	P	post-embryonic development
OS01G0120300	LOC_Os01g03020	1636.02	3.84185	0.122706	3.41e-216	2.29e-212	GO:0009790	P	embryo development
OS01G0120300	LOC_Os01g03020	1636.02	3.84185	0.122706	3.41e-216	2.29e-212	GO:0009536	C	plastid
OS01G0120400	LOC_Os01g03030	70.5234	-1.14609	0.53838	0.0117568	0.0419908	GO:0003824	F	catalytic activity
OS01G0120400	LOC_Os01g03030	70.5234	-1.14609	0.53838	0.0117568	0.0419908	GO:0000166	F	nucleotide binding
OS01G0120400	LOC_Os01g03030	70.5234	-1.14609	0.53838	0.0117568	0.0419908	GO:0005737	C	cytoplasm
OS01G0120400	LOC_Os01g03030	70.5234	-1.14609	0.53838	0.0117568	0.0419908	GO:0003676	F	nucleic acid binding
OS01G0120400	LOC_Os01g03030	70.5234	-1.14609	0.53838	0.0117568	0.0419908	GO:0006412	P	translation
OS01G0120400	LOC_Os01g03030	70.5234	-1.14609	0.53838	0.0117568	0.0419908	GO:0006139	P	nucleobase, nucleoside, nucleotide and nucleic acid metabolic process
OS01G0120400	LOC_Os01g03030	70.5234	-1.14609	0.53838	0.0117568	0.0419908	GO:0003824	F	catalytic activity
OS01G0120400	LOC_Os01g03030	70.5234	-1.14609	0.53838	0.0117568	0.0419908	GO:0000166	F	nucleotide binding
OS01G0120400	LOC_Os01g03030	70.5234	-1.14609	0.53838	0.0117568	0.0419908	GO:0005737	C	cytoplasm
OS01G0120400	LOC_Os01g03030	70.5234	-1.14609	0.53838	0.0117568	0.0419908	GO:0003676	F	nucleic acid binding
OS01G0120400	LOC_Os01g03030	70.5234	-1.14609	0.53838	0.0117568	0.0419908	GO:0006412	P	translation
OS01G0120400	LOC_Os01g03030	70.5234	-1.14609	0.53838	0.0117568	0.0419908	GO:0006139	P	nucleobase, nucleoside, nucleotide and nucleic acid metabolic process
OS01G0120600	LOC_Os01g03050	206.692	-1.39161	0.300717	1.14e-06	1.4e-05	GO:0005488	F	binding
OS01G0120600	LOC_Os01g03050	206.692	-1.39161	0.300717	1.14e-06	1.4e-05	GO:0009536	C	plastid
OS01G0120600	LOC_Os01g03050	206.692	-1.39161	0.300717	1.14e-06	1.4e-05	GO:0008152	P	metabolic process
OS01G0120600	LOC_Os01g03050	206.692	-1.39161	0.300717	1.14e-06	1.4e-05	GO:0009579	C	thylakoid
OS01G0120600	LOC_Os01g03050	206.692	-1.39161	0.300717	1.14e-06	1.4e-05	GO:0003824	F	catalytic activity
OS01G0120800	LOC_Os01g03070	8494.29	-0.701824	0.143052	6.51e-07	8.48e-06	None	None	None
OS01G0121300	LOC_Os01g03110	1305.17	-1.1783	0.356389	0.000362907	0.00231794	GO:0005623	C	cell
OS01G0121300	LOC_Os01g03110	1305.17	-1.1783	0.356389	0.000362907	0.00231794	GO:0003674	F	molecular_function
OS01G0121300	LOC_Os01g03110	1305.17	-1.1783	0.356389	0.000362907	0.00231794	GO:0008150	P	biological_process
OS01G0121600	LOC_Os01g03144	87.5277	1.22952	0.537237	0.00712798	0.0280919	GO:0006810	P	transport
OS01G0121600	LOC_Os01g03144	87.5277	1.22952	0.537237	0.00712798	0.0280919	GO:0009987	P	cellular process
OS01G0121600	LOC_Os01g03144	87.5277	1.22952	0.537237	0.00712798	0.0280919	GO:0016787	F	hydrolase activity
OS01G0121600	LOC_Os01g03144	87.5277	1.22952	0.537237	0.00712798	0.0280919	GO:0005215	F	transporter activity
OS01G0121600	LOC_Os01g03144	87.5277	1.22952	0.537237	0.00712798	0.0280919	GO:0009056	P	catabolic process
OS01G0121600	LOC_Os01g03144	87.5277	1.22952	0.537237	0.00712798	0.0280919	GO:0006139	P	nucleobase, nucleoside, nucleotide and nucleic acid metabolic process
OS01G0121600	LOC_Os01g03144	87.5277	1.22952	0.537237	0.00712798	0.0280919	GO:0009536	C	plastid
OS01G0123500	LOC_Os01g03270	3.47553	-1.28288	2.90288	0.0139211	0.0479541	GO:0005634	C	nucleus
OS01G0123500	LOC_Os01g03270	3.47553	-1.28288	2.90288	0.0139211	0.0479541	GO:0019538	P	protein metabolic process
OS01G0123500	LOC_Os01g03270	3.47553	-1.28288	2.90288	0.0139211	0.0479541	GO:0009056	P	catabolic process
OS01G0123500	LOC_Os01g03270	3.47553	-1.28288	2.90288	0.0139211	0.0479541	GO:0009987	P	cellular process
[truncated: 52,947 more rows]

## Sheet: NANHIvsIR64
rap	MSU	baseMean	log2FoldChange	lfcSE	pvalue	padj	GO	GO category	function
[truncated: 111,120 more rows]

## Sheet: NANHIvsIR42
rap	MSU	baseMean	log2FoldChange	lfcSE	pvalue	padj	GO	GO category	function
[truncated: 54,359 more rows]

[truncated: 4 more sheets: MRvsIR64, MRvsIR42, KHOvsIR42, KHOvsIR64]
