# Supplementary material for: Enriched-GWAS and Transcriptome Analysis to Refine and Characterize a Major QTL for Anaerobic Germination Tolerance in Rice
Source: Int J Mol Sci. 2021 Apr 24;22(9):4445. doi: 10.3390/ijms22094445 (PMC8123023; doi:10.3390/ijms22094445)
Supplement: Supplementary file 1 [file ijms-22-04445-s001.zip › Suppl_File11.xlsx]

## Sheet: UnionOsIDs
genes	MSU
Os12g0641300	LOC_Os12g44370
Os12g0640000	LOC_Os12g44270
Os12g0639700	LOC_Os12g44240
Os12g0639600	LOC_Os12g44230
Os12g0639500	LOC_Os12g44220
Os12g0639200	LOC_Os12g44190
Os12g0638900	LOC_Os12g44170
Os12g0638800	LOC_Os12g44160
Os12g0638700	LOC_Os12g44150
Os12g0638100	LOC_Os12g44090
Os12g0637700	LOC_Os12g44060
Os12g0637400	LOC_Os12g44050
Os12g0637300	LOC_Os12g44040
Os12g0637200	LOC_Os12g44030
Os12g0637100	LOC_Os12g44020
Os12g0636200	LOC_Os12g43950
Os12g0636000	LOC_Os12g43930
Os12g0635700	LOC_Os12g43890
Os12g0634800	LOC_Os12g43830
Os12g0634500	LOC_Os12g43790
Os12g0634400	LOC_Os12g43780
Os12g0634000	LOC_Os12g43750
Os12g0633700	LOC_Os12g43730
Os12g0633600	LOC_Os12g43720
Os12g0633200	LOC_Os12g43670
Os12g0632800	LOC_Os12g43640
Os12g0632700	LOC_Os12g43630
Os12g0632600	LOC_Os12g43620
Os12g0632401	None
Os12g0632000	LOC_Os12g43600
Os12g0631150	None
Os12g0631100	LOC_Os12g43550
Os12g0630750	None
Os12g0630600	LOC_Os12g43510
Os12g0630500	LOC_Os12g43490
Os12g0629700	None
Os12g0629600	LOC_Os12g43410
Os12g0628400	LOC_Os12g43363
Os12g0626400	LOC_Os12g43130
Os12g0626100	LOC_Os12g43100
Os12g0625200	LOC_Os12g43000
Os12g0624400	LOC_Os12g42920
Os12g0624000	LOC_Os12g42884
Os12g0623950	None
Os12g0623900	LOC_Os12g42876
Os12g0623600	LOC_Os12g42860
Os12g0623500	LOC_Os12g42850
Os12g0623400	LOC_Os12g42840
Os12g0622850	None
Os12g0622500	LOC_Os12g42760
Os12g0621766	None
Os12g0621700	LOC_Os12g42700
Os12g0621500	LOC_Os12g42660
Os12g0621400	LOC_Os12g42650
Os12g0621300	LOC_Os12g42630
Os12g0621100	LOC_Os12g42610
Os12g0621050	None
Os12g0620866	None
Os12g0620600	LOC_Os12g42570
Os12g0620400	LOC_Os12g42550
Os12g0618800	LOC_Os12g42420
Os12g0618600	LOC_Os12g42400
Os12g0617100	LOC_Os12g42260
Os12g0617000	LOC_Os12g42250
Os12g0616900	LOC_Os12g42230
Os12g0616600	LOC_Os12g42210
Os12g0616400	LOC_Os12g42190
Os12g0616000	LOC_Os12g42160
Os12g0615500	LOC_Os12g42100
Os12g0614600	LOC_Os12g42020
Os12g0613700	LOC_Os12g41950
Os12g0613500	LOC_Os12g41930
Os12g0613300	LOC_Os12g41920
Os12g0612700	LOC_Os12g41860
Os12g0612100	LOC_Os12g41800
Os12g0611900	LOC_Os12g41780
Os12g0611150	None
Os12g0611100	LOC_Os12g41710
Os12g0611000	LOC_Os12g41700
Os12g0610800	LOC_Os12g41690
Os12g0610100	LOC_Os12g41640
Os12g0609900	LOC_Os12g41630
Os12g0609050	None
Os12g0608600	LOC_Os12g41500
Os12g0607100	LOC_Os12g41400
Os12g0607000	LOC_Os12g41390
Os12g0605500	LOC_Os12g41230
Os12g0605400	LOC_Os12g41220
Os12g0605300	LOC_Os12g41210
Os12g0604500	LOC_Os12g41160
Os12g0602200	LOC_Os12g40940
Os12g0601000	LOC_Os12g40860
Os12g0600701	LOC_Os12g40840
Os12g0600200	LOC_Os12g40790
Os12g0599550	LOC_Os12g40730
Os12g0597300	LOC_Os12g40530
Os12g0597200	LOC_Os12g40520
Os12g0595800	LOC_Os12g40419
Os12g0595000	LOC_Os12g40340
Os12g0592900	LOC_Os12g40180
Os12g0592500	LOC_Os12g40140
Os12g0590500	LOC_Os12g39980
Os12g0590400	LOC_Os12g39970
Os12g0588800	LOC_Os12g39830
Os12g0587200	LOC_Os12g39710
Os12g0586400	LOC_Os12g39650
Os12g0586000	LOC_Os12g39620
Os12g0585300	LOC_Os12g39520
Os12g0584700	None
Os12g0583700	LOC_Os12g39400
Os12g0583500	LOC_Os12g39380
Os12g0583400	LOC_Os12g39370
Os12g0582800	LOC_Os12g39320
Os12g0582700	LOC_Os12g39310
Os12g0582000	LOC_Os12g39240
Os12g0581800	LOC_Os12g39210
Os12g0581700	LOC_Os12g39200
Os12g0581350	None
Os12g0580950	None
Os12g0580900	LOC_Os12g39120
Os12g0580600	LOC_Os12g39100
Os12g0579000	LOC_Os12g38970
Os12g0578800	LOC_Os12g38960
Os12g0578400	LOC_Os12g38920
Os12g0578300	LOC_Os12g38910
Os12g0577700	LOC_Os12g38860
Os12g0577600	LOC_Os12g38850
Os12g0576750	LOC_Os12g38770
Os12g0576732	None
Os12g0576600	LOC_Os12g38750
Os12g0576300	LOC_Os12g38730
Os12g0576100	LOC_Os12g38720
Os12g0575400	LOC_Os12g38660
Os12g0575300	None
Os12g0575200	LOC_Os12g38650
Os12g0575000	LOC_Os12g38640
Os12g0574400	LOC_Os12g38590
Os12g0573900	LOC_Os12g38560
Os12g0573800	LOC_Os12g38550
Os12g0573600	None
Os12g0572300	None
Os12g0571200	LOC_Os12g38310
Os12g0571100	LOC_Os12g38300
Os12g0571000	LOC_Os12g38290
Os12g0570400	LOC_Os12g38250
Os12g0570075	None
Os12g0570000	LOC_Os12g38210
Os12g0569700	LOC_Os12g38180
Os12g0569500	LOC_Os12g38170
Os12g0569300	LOC_Os12g38150
Os12g0568800	LOC_Os12g38110
Os12g0568200	LOC_Os12g38051
Os12g0568100	LOC_Os12g38040
Os12g0567700	LOC_Os12g38000
Os12g0567300	LOC_Os12g37970
Os12g0566700	LOC_Os12g37910
Os12g0566300	LOC_Os12g37870
Os12g0566200	LOC_Os12g37860
Os12g0566100	LOC_Os12g37850
Os12g0566050	None
Os12g0566000	LOC_Os12g37840
Os12g0565300	LOC_Os12g37780
Os12g0565100	LOC_Os12g37760
Os12g0564800	LOC_Os12g37740
Os12g0564100	LOC_Os12g37690
Os12g0563600	LOC_Os12g37650
Os12g0563200	LOC_Os12g37610
Os12g0563000	LOC_Os12g37600
Os12g0562900	LOC_Os12g37590
Os12g0562400	LOC_Os12g37560
Os12g0560900	LOC_Os12g37410
Os12g0560700	LOC_Os12g37400
Os12g0560600	LOC_Os12g37390
Os12g0560400	LOC_Os12g37370
Os12g0559100	LOC_Os12g37250
Os12g0558400	LOC_Os12g37160
Os12g0557900	LOC_Os12g37110
Os12g0557400	LOC_Os12g37060
Os12g0556200	LOC_Os12g36910
Os12g0555600	LOC_Os12g36890
Os12g0555500	LOC_Os12g36880
Os12g0555400	LOC_Os12g36870
Os12g0555300	LOC_Os12g36860
Os12g0555200	LOC_Os12g36850
Os12g0555000	LOC_Os12g36830
Os12g0554800	LOC_Os12g36810
Os12g0554100	LOC_Os12g36750
Os12g0553600	LOC_Os12g36730
Os12g0553200	LOC_Os12g36720
Os12g0553050	None
Os12g0552900	LOC_Os12g36690
Os12g0552800	LOC_Os12g36680
Os12g0552550	None
Os12g0552400	LOC_Os12g36630
Os12g0551900	LOC_Os12g36580
Os12g0550800	LOC_Os12g36430
Os12g0549700	None
Os12g0548700	LOC_Os12g36240
Os12g0548501	LOC_Os12g36220
Os12g0548401	LOC_Os12g36210
Os12g0548100	LOC_Os12g36170
Os12g0547600	LOC_Os12g36110
Os12g0547500	LOC_Os12g36100
Os12g0545600	None
Os12g0541600	LOC_Os12g35640
Os12g0541500	LOC_Os12g35630
Os12g0541400	LOC_Os12g35620
Os12g0541350	None
Os12g0541200	LOC_Os12g35590
Os12g0540900	LOC_Os12g35570
Os12g0539800	LOC_Os12g35470
Os12g0539751	LOC_Os12g35465
Os12g0539750	LOC_Os12g35395
Os12g0539700	LOC_Os12g35460
Os12g0539333	None
Os12g0538700	LOC_Os12g35340
Os12g0538600	LOC_Os12g35330
Os12g0538100	LOC_Os12g35270
Os12g0537000	LOC_Os12g35120
Os12g0536000	LOC_Os12g35040
Os12g0535900	LOC_Os12g35030
Os12g0535300	LOC_Os12g34980
Os12g0534200	LOC_Os12g34890
Os12g0534100	LOC_Os12g34880
Os12g0533800	LOC_Os12g34870
Os12g0533600	LOC_Os12g34854
Os12g0533400	LOC_Os12g34840
Os12g0530100	LOC_Os12g34524
Os12g0530000	LOC_Os12g34510
Os12g0529800	None
Os12g0529400	LOC_Os12g34460
Os12g0529200	LOC_Os12g34440
Os12g0528000	LOC_Os12g34350
Os12g0527700	LOC_Os12g34320
Os12g0527500	LOC_Os12g34300
Os12g0527301	None
Os12g0524750	LOC_Os12g34045
Os12g0517200	LOC_Os12g33240
Os12g0517100	LOC_Os12g33230
Os12g0516900	LOC_Os12g33210
Os12g0516800	LOC_Os12g33194
Os12g0516700	LOC_Os12g33180
Os12g0516300	LOC_Os12g33160
Os12g0515600	LOC_Os12g33100
Os12g0515400	LOC_Os12g33080
Os12g0515300	LOC_Os12g33070
Os12g0514600	LOC_Os12g32992
Os12g0514500	LOC_Os12g32986
Os12g0514400	LOC_Os12g32980
Os12g0514300	LOC_Os12g32970
Os12g0514000	LOC_Os12g32940
Os12g0512800	LOC_Os12g32850
Os12g0512100	LOC_Os12g32760
Os12g0512000	LOC_Os12g32750
Os12g0511300	LOC_Os12g32650
Os12g0510900	LOC_Os12g32620
Os12g0509900	None
Os12g0509200	LOC_Os12g32480
Os12g0509100	LOC_Os12g32470
Os12g0508400	LOC_Os12g32390
Os12g0508300	LOC_Os12g32380
Os12g0508200	LOC_Os12g32360
Os12g0508100	LOC_Os12g32330
Os12g0507500	LOC_Os12g32280
Os12g0506500	LOC_Os12g32190
Os12g0505800	LOC_Os12g32130
Os12g0503300	LOC_Os12g31890
Os12g0503200	LOC_Os12g31880
Os12g0502800	LOC_Os12g31850
Os12g0502300	LOC_Os12g31810
Os12g0502200	LOC_Os12g31800
Os12g0502000	LOC_Os12g31780
Os12g0501900	LOC_Os12g31770
Os12g0500800	LOC_Os12g31660
Os12g0498500	LOC_Os12g31460
Os12g0498400	LOC_Os12g31450
Os12g0498300	LOC_Os12g31440
Os12g0497300	LOC_Os12g31370
Os12g0495600	LOC_Os12g31160
Os12g0489800	LOC_Os12g30590
Os12g0488600	LOC_Os12g30490
Os12g0487500	None
Os12g0486900	LOC_Os12g30180
Os12g0486800	LOC_Os12g30170
Os12g0485800	LOC_Os12g30060
Os12g0485600	LOC_Os12g30040
Os12g0485500	LOC_Os12g30030
Os12g0485400	LOC_Os12g30020
Os12g0485300	None
Os12g0485150	LOC_Os12g30000
Os12g0484900	LOC_Os12g29980
Os12g0484600	LOC_Os12g29950
Os12g0483700	None
Os12g0482700	LOC_Os12g29760
Os12g0481200	LOC_Os12g29670
Os12g0480100	LOC_Os12g29570
Os12g0480000	LOC_Os12g29560
Os12g0479900	LOC_Os12g29550
Os12g0479400	LOC_Os12g29520
Os12g0477400	LOC_Os12g29330
Os12g0477050	None
Os12g0472500	LOC_Os12g28750
Os12g0472366	None
Os12g0472300	LOC_Os12g28710
Os12g0470700	LOC_Os12g28550
Os12g0468600	LOC_Os12g28270
Os12g0468300	LOC_Os12g28250
Os12g0467300	LOC_Os12g28100
Os12g0460400	LOC_Os12g27470
Os12g0459300	LOC_Os12g27370
Os12g0455000	LOC_Os12g26960
Os12g0448900	LOC_Os12g26290
Os12g0448400	LOC_Os12g26220
Os12g0447466	None
Os12g0447000	None
Os12g0443800	LOC_Os12g25720
Os12g0443500	LOC_Os12g25690
Os12g0443000	LOC_Os12g25660
Os12g0442900	LOC_Os12g25640
Os12g0440300	None
Os12g0439201	None
Os12g0438600	LOC_Os12g25200
Os12g0438000	LOC_Os12g25120
Os12g0437800	LOC_Os12g25090
Os12g0435000	LOC_Os12g24790
Os12g0434400	LOC_Os12g24650
Os12g0433700	LOC_Os12g24580
Os12g0433500	LOC_Os12g24550
Os12g0433133	LOC_Os12g24540
Os12g0433066	None
Os12g0431700	LOC_Os12g24390
Os12g0431300	LOC_Os12g24330
Os12g0430000	LOC_Os12g24250
Os12g0429950	None
Os12g0428700	LOC_Os12g24084
Os12g0428200	LOC_Os12g24040
Os12g0428000	LOC_Os12g24020
Os12g0425800	LOC_Os12g23780
Os12g0424700	LOC_Os12g23700
Os12g0424300	LOC_Os12g23620
Os12g0424180	LOC_Os12g23610
Os12g0423484	None
Os12g0423313	None
Os12g0422971	None
Os12g0421000	LOC_Os12g23280
Os12g0420400	LOC_Os12g23200
Os12g0420200	LOC_Os12g23180
Os12g0417100	LOC_Os12g22839
Os12g0417000	LOC_Os12g22810
Os12g0416800	LOC_Os12g22800
Os12g0410150	None
Os12g0410000	None
Os12g0409800	None
Os12g0409000	LOC_Os12g22030
Os12g0408800	None
Os12g0406732	None
Os12g0406200	LOC_Os12g21798
Os12g0406000	LOC_Os12g21784
Os12g0405700	None
Os12g0405300	LOC_Os12g21734
Os12g0405100	LOC_Os12g21700
Os12g0404400	None
Os12g0299700	LOC_Os12g20410
Os12g0299300	LOC_Os12g20390
Os12g0298600	LOC_Os12g20310
Os12g0292900	LOC_Os12g19530
Os12g0292400	LOC_Os12g19470
Os12g0292301	None
Os12g0291066	None
Os12g0290600	LOC_Os12g19350
Os12g0290150	LOC_Os12g19304
Os12g0288400	LOC_Os12g19030
Os12g0287300	LOC_Os12g18900
Os12g0286600	LOC_Os12g18860
Os12g0285600	LOC_Os12g18770
Os12g0284800	None
Os12g0283800	LOC_Os12g18630
Os12g0283400	LOC_Os12g18560
Os12g0282000	LOC_Os12g18410
Os12g0281966	None
Os12g0278700	LOC_Os12g18110
Os12g0277900	LOC_Os12g17950
Os12g0277650	None
Os12g0277500	LOC_Os12g17910
Os12g0277000	LOC_Os12g17880
Os12g0276550	None
Os12g0276100	LOC_Os12g17830
Os12g0275400	LOC_Os12g17690
Os12g0274750	None
Os12g0274700	LOC_Os12g17600
Os12g0273900	LOC_Os12g17550
Os12g0273700	LOC_Os12g17530
Os12g0272800	LOC_Os12g17410
Os12g0272500	None
Os12g0271600	LOC_Os12g17310
Os12g0270900	LOC_Os12g17160
Os12g0270300	LOC_Os12g17090
Os12g0269700	LOC_Os12g17030
Os12g0269600	LOC_Os12g17010
Os12g0269100	LOC_Os12g16880
Os12g0268100	None
Os12g0268000	LOC_Os12g16720
Os12g0267800	None
Os12g0267500	LOC_Os12g16670
Os12g0267400	None
Os12g0267064	None
Os12g0265701	None
Os12g0265600	None
Os12g0265400	LOC_Os12g16480
Os12g0265100	LOC_Os12g16410
Os12g0264800	LOC_Os12g16360
Os12g0263800	LOC_Os12g16260
Os12g0263600	LOC_Os12g16250
Os12g0263100	LOC_Os12g16210
Os12g0263050	None
Os12g0263000	LOC_Os12g16200
Os12g0260500	LOC_Os12g16010
Os12g0258700	LOC_Os12g15680
Os12g0258200	LOC_Os12g15590
Os12g0257900	LOC_Os12g15550
Os12g0257600	LOC_Os12g15530
Os12g0257000	LOC_Os12g15470
Os12g0256400	None
Os12g0255850	None
Os12g0255200	LOC_Os12g15314
Os12g0254825	None
Os12g0254700	LOC_Os12g15240
Os12g0254601	None
Os12g0254400	LOC_Os12g15222
Os12g0250900	LOC_Os12g14840
Os12g0250700	None
Os12g0249100	LOC_Os12g14580
Os12g0245800	LOC_Os12g14224
Os12g0245700	LOC_Os12g14220
Os12g0245100	LOC_Os12g14150
Os12g0244500	LOC_Os12g14110
Os12g0242975	None
Os12g0242900	LOC_Os12g13950
Os12g0239200	LOC_Os12g13670
Os12g0239000	LOC_Os12g13660
Os12g0238000	LOC_Os12g13570
Os12g0237900	LOC_Os12g13550
Os12g0236400	LOC_Os12g13380
Os12g0236100	LOC_Os12g13340
Os12g0235650	None
Os12g0234800	LOC_Os12g13270
Os12g0234000	LOC_Os12g13174
Os12g0233300	LOC_Os12g13120
Os12g0232300	LOC_Os12g13030
Os12g0231700	LOC_Os12g12990
Os12g0231100	LOC_Os12g12950
Os12g0230133	LOC_Os12g12854
Os12g0230100	LOC_Os12g12850
Os12g0229100	LOC_Os12g12765
Os12g0228400	LOC_Os12g12664
Os12g0228300	LOC_Os12g12650
Os12g0225100	LOC_Os12g12360
Os12g0224500	LOC_Os12g12300
Os12g0224400	LOC_Os12g12290
Os12g0224000	LOC_Os12g12260
Os12g0221700	LOC_Os12g12010
Os12g0220866	None
Os12g0219700	LOC_Os12g11830
Os12g0218600	LOC_Os12g11690
Os12g0217400	LOC_Os12g11500
Os12g0216000	None
Os12g0212100	LOC_Os12g10900
Os12g0211900	LOC_Os12g10880
Os12g0211500	LOC_Os12g10870
Os12g0211400	LOC_Os12g10850
Os12g0211000	LOC_Os12g10810
Os12g0210800	LOC_Os12g10784
Os12g0210601	None
Os12g0210400	LOC_Os12g10740
Os12g0210300	LOC_Os12g10730
Os12g0210200	LOC_Os12g10720
Os12g0209901	LOC_Os12g10710
Os12g0209800	LOC_Os12g10710
Os12g0209700	LOC_Os12g10700
Os12g0209300	LOC_Os12g10670
Os12g0209200	LOC_Os12g10660
Os12g0207600	LOC_Os12g10580
Os12g0207500	LOC_Os12g10570
Os12g0205500	LOC_Os12g10410
Os12g0199000	LOC_Os12g09720
Os12g0197700	LOC_Os12g09590
Os12g0197400	LOC_Os12g09570
Os12g0197100	LOC_Os12g09540
Os12g0193800	LOC_Os12g09190
Os12g0190000	LOC_Os12g08810
Os12g0189700	LOC_Os12g08790
Os12g0189400	LOC_Os12g08770
Os12g0189300	LOC_Os12g08760
Os12g0188700	LOC_Os12g08730
Os12g0188566	None
Os12g0187500	LOC_Os12g08670
Os12g0183200	LOC_Os12g08270
Os12g0183100	LOC_Os12g08260
Os12g0182800	LOC_Os12g08230
Os12g0182300	LOC_Os12g08180
Os12g0181900	LOC_Os12g08140
Os12g0181600	LOC_Os12g08130
Os12g0180100	LOC_Os12g07970
Os12g0179700	LOC_Os12g07940
Os12g0178700	LOC_Os12g07880
Os12g0178200	LOC_Os12g07830
Os12g0178100	LOC_Os12g07820
Os12g0178000	LOC_Os12g07810
Os12g0175400	LOC_Os12g07640
Os12g0174100	LOC_Os12g07540
Os12g0172150	LOC_Os12g07420
Os12g0171900	None
Os12g0171801	None
Os12g0171700	LOC_Os12g07390
Os12g0171200	LOC_Os12g07350
Os12g0170600	LOC_Os12g07290
Os12g0170100	LOC_Os12g07260
Os12g0169400	LOC_Os12g07190
Os12g0168900	LOC_Os12g07140
Os12g0168800	LOC_Os12g07120
Os12g0168700	LOC_Os12g07110
Os12g0168200	LOC_Os12g07050
Os12g0168100	LOC_Os12g07030
Os12g0168000	LOC_Os12g07020
Os12g0167950	None
Os12g0167900	LOC_Os12g07010
Os12g0167700	LOC_Os12g06980
Os12g0166700	LOC_Os12g06930
Os12g0166500	LOC_Os12g06910
Os12g0165700	LOC_Os12g06850
Os12g0164450	None
Os12g0164300	LOC_Os12g06740
Os12g0163750	None
Os12g0163700	LOC_Os12g06660
Os12g0163500	LOC_Os12g06640
Os12g0163300	LOC_Os12g06620
Os12g0163200	LOC_Os12g06610
Os12g0162500	LOC_Os12g06520
Os12g0161700	LOC_Os12g06464
Os12g0161100	LOC_Os12g06410
Os12g0160500	LOC_Os12g06340
Os12g0160200	LOC_Os12g06290
Os12g0159700	LOC_Os12g06270
Os12g0158900	LOC_Os12g06210
Os12g0158700	LOC_Os12g06190
Os12g0157066	None
Os12g0157000	LOC_Os12g06080
Os12g0156500	LOC_Os12g06030
Os12g0156200	LOC_Os12g06010
Os12g0154400	LOC_Os12g05810
Os12g0153900	LOC_Os12g05770
Os12g0153433	LOC_Os12g05715
Os12g0152800	LOC_Os12g05660
Os12g0152500	LOC_Os12g05630
Os12g0151000	LOC_Os12g05540
Os12g0150100	LOC_Os12g05430
Os12g0149800	LOC_Os12g05410
Os12g0149700	LOC_Os12g05394
Os12g0149100	LOC_Os12g05370
Os12g0149000	LOC_Os12g05360
Os12g0148600	LOC_Os12g05320
Os12g0148400	LOC_Os12g05310
Os12g0147800	LOC_Os12g05260
Os12g0147500	LOC_Os12g05230
Os12g0146500	LOC_Os12g05180
Os12g0145900	LOC_Os12g05120
Os12g0145200	LOC_Os12g05060
Os12g0145100	LOC_Os12g05050
Os12g0144600	LOC_Os12g05040
Os12g0141600	LOC_Os12g04750
Os12g0141500	LOC_Os12g04740
Os12g0141100	LOC_Os12g04700
Os12g0139600	LOC_Os12g04520
Os12g0139500	LOC_Os12g04510
Os12g0139350	None
Os12g0139300	LOC_Os12g04480
Os12g0138500	LOC_Os12g04410
Os12g0137500	LOC_Os12g04290
Os12g0137200	LOC_Os12g04260
Os12g0137100	LOC_Os12g04240
Os12g0136600	LOC_Os12g04210
Os12g0136500	LOC_Os12g04204
Os12g0136100	LOC_Os12g04170
Os12g0135200	LOC_Os12g04130
Os12g0135000	LOC_Os12g04110
Os12g0133900	LOC_Os12g04010
Os12g0133850	None
Os12g0133800	LOC_Os12g04000
Os12g0133000	LOC_Os12g03870
Os12g0132400	LOC_Os12g03822
Os12g0132200	LOC_Os12g03810
Os12g0131900	LOC_Os12g03790
Os12g0131233	None
Os12g0131200	LOC_Os12g03730
Os12g0130300	LOC_Os12g03650
Os12g0130200	LOC_Os12g03640
Os12g0129700	LOC_Os12g03594
Os12g0129400	LOC_Os12g03540
Os12g0128700	LOC_Os12g03470
Os12g0128600	None
Os12g0128000	LOC_Os12g03440
Os12g0127100	LOC_Os12g03360
Os12g0126300	LOC_Os12g03290
Os12g0126000	LOC_Os12g03260
Os12g0125800	LOC_Os12g03230
Os12g0125500	LOC_Os12g03200
Os12g0125400	LOC_Os12g03190
Os12g0125000	LOC_Os12g03150
Os12g0124700	LOC_Os12g03130
Os12g0124500	LOC_Os12g03110
Os12g0124200	LOC_Os12g03090
Os12g0123900	LOC_Os12g03060
Os12g0121100	LOC_Os12g02810
Os12g0120400	LOC_Os12g02750
Os12g0120000	LOC_Os12g02710
Os12g0119000	LOC_Os12g02640
Os12g0118800	LOC_Os12g02660
Os12g0118700	LOC_Os12g02620
Os12g0118400	LOC_Os12g02589
Os12g0118200	LOC_Os12g02570
Os12g0117900	None
Os12g0117350	None
Os12g0117300	LOC_Os12g02520
Os12g0116900	LOC_Os12g02490
Os12g0116400	LOC_Os12g02420
Os12g0116200	None
Os12g0116000	LOC_Os12g02390
Os12g0115900	LOC_Os12g02380
Os12g0115801	None
Os12g0115700	LOC_Os12g02370
Os12g0115150	None
Os12g0115100	LOC_Os12g02320
Os12g0115050	LOC_Os12g02310
Os12g0115000	LOC_Os12g02310
Os12g0114200	LOC_Os12g02260
Os12g0114100	LOC_Os12g02250
Os12g0113500	LOC_Os12g02200
Os12g0112600	LOC_Os12g02130
Os12g0112500	LOC_Os12g02120
Os12g0112200	LOC_Os12g02094
Os12g0111600	LOC_Os12g02040
Os12g0111500	LOC_Os12g02030
Os12g0111000	LOC_Os12g02000
Os12g0110400	LOC_Os12g01950
Os12g0110300	LOC_Os12g01940
Os12g0109850	LOC_Os12g01910
Os12g0109750	None
Os12g0109700	LOC_Os12g01900
Os12g0109633	LOC_Os12g01890
Os12g0109600	LOC_Os12g01880
Os12g0108600	LOC_Os12g01770
Os12g0108500	LOC_Os12g01760
Os12g0108100	LOC_Os12g01740
Os12g0108000	LOC_Os12g01730
Os12g0107700	LOC_Os12g01700
Os12g0107500	LOC_Os12g01680
Os12g0106900	LOC_Os12g01620
Os12g0106500	LOC_Os12g01570
Os12g0106100	LOC_Os12g01540
Os12g0106000	LOC_Os12g01530
Os12g0105300	LOC_Os12g01449
Os12g0105200	LOC_Os12g01430
Os12g0104700	LOC_Os12g01380
Os12g0104400	LOC_Os12g01370
Os12g0103580	LOC_Os12g01290
Os12g0103540	None
Os12g0102900	LOC_Os12g01230
Os12g0102700	LOC_Os12g01220
Os12g0102600	LOC_Os12g01210
Os12g0102350	LOC_Os12g01180
Os12g0100500	LOC_Os12g01030
Os12g0100200	LOC_Os12g01020
Os12g0100100	LOC_Os12g01010
Os11g0709000	None
Os11g0707300	LOC_Os11g48000
Os11g0707000	LOC_Os11g47970
Os11g0706100	LOC_Os11g47930
Os11g0705900	LOC_Os11g47900
Os11g0704600	LOC_Os11g47820
Os11g0704000	LOC_Os11g47770
Os11g0703900	LOC_Os11g47760
Os11g0703400	LOC_Os11g47710
Os11g0703100	LOC_Os11g47680
Os11g0702250	None
Os11g0702200	LOC_Os11g47610
Os11g0702100	LOC_Os11g47600
Os11g0702000	None
Os11g0701900	LOC_Os11g47590
Os11g0701600	LOC_Os11g47570
Os11g0701500	LOC_Os11g47560
Os11g0701400	LOC_Os11g47550
Os11g0701200	LOC_Os11g47530
Os11g0701000	LOC_Os11g47510
Os11g0700900	LOC_Os11g47500
Os11g0700500	LOC_Os11g47460
Os11g0700100	LOC_Os11g47447
Os11g0698567	None
Os11g0697350	LOC_Os11g47453
Os11g0697100	None
Os11g0697001	None
Os11g0696600	LOC_Os11g47370
Os11g0696200	LOC_Os11g47330
Os11g0695800	LOC_Os11g47310
Os11g0694500	None
Os11g0694100	LOC_Os11g47140
Os11g0693900	LOC_Os11g47130
Os11g0693800	LOC_Os11g47120
Os11g0692500	LOC_Os11g47030
Os11g0692000	None
Os11g0691800	LOC_Os11g46960
Os11g0691650	LOC_Os11g46950
Os11g0691600	LOC_Os11g46950
Os11g0691100	LOC_Os11g46860
Os11g0691050	None
Os11g0689100	LOC_Os11g46210
Os11g0689000	LOC_Os11g46200
Os11g0688832	LOC_Os11g46200
Os11g0687001	None
Os11g0686900	LOC_Os11g45970
Os11g0686500	LOC_Os11g45930
Os11g0686400	LOC_Os11g45924
Os11g0685700	LOC_Os11g45850
Os11g0685600	LOC_Os11g45840
Os11g0685500	None
Os11g0684700	LOC_Os11g45790
Os11g0684400	None
Os11g0684100	LOC_Os11g45750
Os11g0684000	LOC_Os11g45740
Os11g0683800	LOC_Os11g45730
Os11g0683600	None
Os11g0683500	LOC_Os11g45710
Os11g0682600	LOC_Os11g45620
Os11g0682501	LOC_Os11g45620
Os11g0679700	LOC_Os11g45400
Os11g0678301	LOC_Os11g45295
Os11g0678200	LOC_Os11g45290
Os11g0678000	LOC_Os11g45280
Os11g0677101	LOC_Os11g45190
Os11g0677050	None
Os11g0677000	LOC_Os11g45180
Os11g0676800	LOC_Os11g45160
Os11g0676500	LOC_Os11g45130
Os11g0676200	LOC_Os11g44990
Os11g0676050	LOC_Os11g45060
Os11g0675200	LOC_Os11g45090
Os11g0674400	LOC_Os11g45050
Os11g0673900	LOC_Os11g44970
Os11g0673600	LOC_Os11g44960
Os11g0673100	LOC_Os11g44940
Os11g0673000	LOC_Os11g44930
Os11g0672400	LOC_Os11g44880
Os11g0672300	LOC_Os11g44870
Os11g0671100	None
Os11g0671000	LOC_Os11g44810
Os11g0670800	LOC_Os11g44790
Os11g0670100	LOC_Os11g44750
Os11g0669100	LOC_Os11g44680
Os11g0668650	LOC_Os11g44630
Os11g0668100	LOC_Os11g44580
Os11g0667700	LOC_Os11g44560
Os11g0667000	LOC_Os11g44500
Os11g0666200	LOC_Os11g44430
Os11g0665600	LOC_Os11g44380
Os11g0664800	LOC_Os11g44340
Os11g0664500	LOC_Os11g44310
Os11g0662950	None
Os11g0661400	LOC_Os11g43970
Os11g0661300	LOC_Os11g43960
Os11g0661101	None
Os11g0660500	LOC_Os11g43900
Os11g0660000	LOC_Os11g43860
Os11g0659500	LOC_Os11g43820
Os11g0658800	LOC_Os11g43750
Os11g0657200	LOC_Os11g43610
Os11g0657000	LOC_Os11g43590
Os11g0656400	LOC_Os11g43550
Os11g0656000	LOC_Os11g43530
Os11g0655900	LOC_Os11g43520
Os11g0655300	LOC_Os11g43420
Os11g0655200	LOC_Os11g43410
Os11g0655100	None
Os11g0655000	LOC_Os11g43404
Os11g0654800	LOC_Os11g43390
Os11g0654000	None
Os11g0652900	LOC_Os11g43200
Os11g0652100	LOC_Os11g43140
Os11g0650700	None
Os11g0650600	LOC_Os11g43040
Os11g0649600	LOC_Os11g42960
Os11g0649500	LOC_Os11g42950
Os11g0649400	LOC_Os11g42940
Os11g0649300	LOC_Os11g42930
Os11g0648800	LOC_Os11g42890
Os11g0648400	LOC_Os11g42850
Os11g0648100	LOC_Os11g42800
Os11g0646801	None
Os11g0645972	None
Os11g0645886	LOC_Os11g42590
Os11g0645800	LOC_Os11g42580
Os11g0645600	None
Os11g0644600	LOC_Os11g42490
Os11g0643800	LOC_Os11g42430
Os11g0642800	LOC_Os11g42350
Os11g0640800	LOC_Os11g42100
Os11g0640000	LOC_Os11g42060
Os11g0639600	LOC_Os11g42040
Os11g0639100	LOC_Os11g42010
Os11g0638900	LOC_Os11g41990
Os11g0638000	LOC_Os11g41910
Os11g0637800	LOC_Os11g41900
Os11g0637100	LOC_Os11g41840
Os11g0636900	LOC_Os11g41820
Os11g0636050	LOC_Os11g41770
Os11g0635400	None
Os11g0635300	LOC_Os11g41680
Os11g0634902	None
Os11g0634800	LOC_Os11g41650
Os11g0634200	LOC_Os11g41600
Os11g0633600	None
Os11g0629500	LOC_Os11g41160
Os11g0629300	LOC_Os11g41140
Os11g0629200	LOC_Os11g41130
Os11g0628000	LOC_Os11g41100
Os11g0621500	LOC_Os11g40610
Os11g0621400	LOC_Os11g40600
Os11g0621300	LOC_Os11g40590
Os11g0620100	LOC_Os11g40510
Os11g0620000	LOC_Os11g40500
Os11g0615800	LOC_Os11g40150
Os11g0615600	LOC_Os11g40130
Os11g0615300	LOC_Os11g40110
Os11g0615200	LOC_Os11g40100
Os11g0615100	LOC_Os11g40090
Os11g0614900	LOC_Os11g40070
Os11g0611600	None
Os11g0611100	LOC_Os11g39680
Os11g0610900	LOC_Os11g39670
Os11g0610700	LOC_Os11g39650
Os11g0609500	LOC_Os11g39530
Os11g0608000	LOC_Os11g39430
Os11g0607900	LOC_Os11g39420
Os11g0607200	LOC_Os11g39370
Os11g0606800	LOC_Os11g39330
Os11g0606600	None
Os11g0606500	LOC_Os11g39320
Os11g0606300	LOC_Os11g39300
Os11g0606100	LOC_Os11g39280
Os11g0605600	LOC_Os11g39230
Os11g0605100	LOC_Os11g39190
Os11g0604900	LOC_Os11g39160
Os11g0604700	LOC_Os11g39140
Os11g0603000	LOC_Os11g39000
Os11g0602800	LOC_Os11g38980
Os11g0602750	None
Os11g0602600	LOC_Os11g38959
Os11g0602550	None
Os11g0602500	None
Os11g0602400	LOC_Os11g38930
Os11g0601700	LOC_Os11g38870
Os11g0600900	LOC_Os11g38810
Os11g0599200	LOC_Os11g38650
Os11g0598800	LOC_Os11g38610
Os11g0597700	LOC_Os11g38480
Os11g0597601	None
Os11g0597500	LOC_Os11g38450
Os11g0594800	LOC_Os11g38220
Os11g0594700	LOC_Os11g38210
Os11g0594500	LOC_Os11g38190
Os11g0594200	LOC_Os11g38170
Os11g0594000	LOC_Os11g38160
Os11g0593700	LOC_Os11g38140
Os11g0593000	LOC_Os11g38050
Os11g0592900	LOC_Os11g38040
Os11g0592850	None
Os11g0592600	LOC_Os11g38010
Os11g0592500	LOC_Os11g38000
Os11g0592350	None
Os11g0592300	LOC_Os11g37980
Os11g0592200	LOC_Os11g37970
Os11g0592000	LOC_Os11g37950
Os11g0591800	LOC_Os11g37940
Os11g0591550	LOC_Os11g37920
Os11g0591300	None
Os11g0591200	LOC_Os11g37900
Os11g0591000	LOC_Os11g37880
Os11g0588300	LOC_Os11g37730
Os11g0587600	LOC_Os11g37700
Os11g0587300	LOC_Os11g37670
Os11g0586300	LOC_Os11g37560
Os11g0583200	LOC_Os11g37330
Os11g0582801	None
Os11g0582100	LOC_Os11g37230
Os11g0580800	LOC_Os11g37130
Os11g0580000	LOC_Os11g37100
Os11g0579800	LOC_Os11g37080
Os11g0578700	LOC_Os11g37010
Os11g0578100	LOC_Os11g36960
Os11g0576975	None
Os11g0576900	LOC_Os11g36830
Os11g0576400	LOC_Os11g36790
Os11g0575600	LOC_Os11g36719
Os11g0575500	LOC_Os11g36700
Os11g0575200	LOC_Os11g36679
Os11g0573000	LOC_Os11g36470
Os11g0572800	LOC_Os11g36450
Os11g0572400	LOC_Os11g36420
Os11g0572301	LOC_Os11g36410
Os11g0571900	LOC_Os11g36340
Os11g0569600	LOC_Os11g36160
Os11g0569500	LOC_Os11g36150
Os11g0569300	LOC_Os11g36140
Os11g0568800	LOC_Os11g36090
Os11g0568300	LOC_Os11g36030
Os11g0567800	LOC_Os11g36000
Os11g0567200	None
Os11g0566800	LOC_Os11g35930
Os11g0565400	LOC_Os11g35870
Os11g0562100	LOC_Os11g35710
Os11g0559533	None
Os11g0559200	LOC_Os11g35500
Os11g0558400	LOC_Os11g35410
Os11g0558300	LOC_Os11g35400
Os11g0557000	LOC_Os11g35310
Os11g0555866	None
Os11g0555600	LOC_Os11g35220
Os11g0552600	LOC_Os11g35090
Os11g0551800	LOC_Os11g35020
Os11g0551350	LOC_Os11g34980
Os11g0550800	LOC_Os11g34940
Os11g0550500	LOC_Os11g34920
Os11g0550300	LOC_Os11g34910
Os11g0550100	LOC_Os11g34880
Os11g0549700	LOC_Os11g34860
Os11g0549680	LOC_Os11g34820
Os11g0549675	LOC_Os11g34810
Os11g0549670	None
Os11g0549665	LOC_Os11g34790
Os11g0549655	LOC_Os11g34770
Os11g0549650	LOC_Os11g34760
Os11g0549620	LOC_Os11g34720
Os11g0549615	LOC_Os11g34710
Os11g0549605	LOC_Os11g34690
Os11g0549401	None
Os11g0549300	LOC_Os11g34624
Os11g0548600	LOC_Os11g34570
Os11g0547800	None
Os11g0546750	None
Os11g0546200	LOC_Os11g34364
Os11g0545300	LOC_Os11g34270
Os11g0545000	LOC_Os11g34230
Os11g0544900	LOC_Os11g34220
Os11g0543900	None
Os11g0540100	None
Os11g0539901	None
Os11g0539700	LOC_Os11g33320
Os11g0539600	LOC_Os11g33310
Os11g0539500	LOC_Os11g33300
Os11g0539200	LOC_Os11g33270
Os11g0539000	LOC_Os11g33250
Os11g0538400	LOC_Os11g33190
Os11g0537375	None
Os11g0537300	LOC_Os11g33100
Os11g0535600	LOC_Os11g33030
Os11g0535525	LOC_Os11g33000
Os11g0534100	LOC_Os11g32950
Os11g0533800	LOC_Os11g32940
Os11g0533100	LOC_Os11g32880
Os11g0532600	LOC_Os11g32810
Os11g0531700	LOC_Os11g32750
Os11g0530700	None
Os11g0530600	LOC_Os11g32650
Os11g0529900	LOC_Os11g32620
Os11g0528500	LOC_Os11g32500
Os11g0527250	None
Os11g0526800	LOC_Os11g32360
Os11g0526200	LOC_Os11g32320
Os11g0524601	LOC_Os11g32170
Os11g0524300	LOC_Os11g32160
Os11g0523700	LOC_Os11g32100
Os11g0523500	LOC_Os11g32090
Os11g0523110	LOC_Os11g32030
Os11g0522900	LOC_Os11g31980
Os11g0522000	LOC_Os11g31880
Os11g0521500	LOC_Os11g31900
Os11g0519500	LOC_Os11g31820
Os11g0518900	LOC_Os11g31770
Os11g0517400	LOC_Os11g31700
Os11g0514800	LOC_Os11g31570
Os11g0514500	LOC_Os11g31540
Os11g0514100	LOC_Os11g31500
Os11g0513000	LOC_Os11g31420
Os11g0508600	LOC_Os11g31190
Os11g0507200	LOC_Os11g31090
Os11g0503900	LOC_Os11g30810
Os11g0503400	LOC_Os11g30790
Os11g0498600	LOC_Os11g30500
Os11g0497000	LOC_Os11g30410
Os11g0496500	LOC_Os11g30360
Os11g0493100	LOC_Os11g30110
Os11g0491600	LOC_Os11g29920
Os11g0490900	LOC_Os11g29870
Os11g0490600	LOC_Os11g29840
Os11g0490300	LOC_Os11g29810
Os11g0490100	LOC_Os11g29780
Os11g0488900	LOC_Os11g29710
Os11g0488600	LOC_Os11g29700
Os11g0488500	LOC_Os11g29690
Os11g0486000	LOC_Os11g29520
Os11g0485900	LOC_Os11g29520
Os11g0485500	LOC_Os11g29500
Os11g0485200	LOC_Os11g29490
Os11g0484300	LOC_Os11g29380
Os11g0484000	LOC_Os11g29370
Os11g0483900	LOC_Os11g29350
Os11g0482901	None
Os11g0482200	LOC_Os11g29210
Os11g0482000	LOC_Os11g29190
Os11g0481200	LOC_Os11g29120
Os11g0480000	LOC_Os11g29030
Os11g0475000	LOC_Os11g28530
Os11g0474900	LOC_Os11g28530
Os11g0473350	LOC_Os11g28365
Os11g0471300	LOC_Os11g28184
Os11g0471200	None
Os11g0470550	None
Os11g0470500	LOC_Os11g28104
Os11g0466966	LOC_Os11g27799
Os11g0462900	LOC_Os11g27440
Os11g0462800	None
Os11g0462500	LOC_Os11g27430
Os11g0461200	LOC_Os11g27370
Os11g0461000	LOC_Os11g27329
Os11g0460700	LOC_Os11g27250
Os11g0460500	LOC_Os11g27240
Os11g0456100	LOC_Os11g26890
Os11g0455500	LOC_Os11g26850
Os11g0452400	LOC_Os11g26594
Os11g0450050	LOC_Os11g26350
Os11g0448700	LOC_Os11g26190
Os11g0448400	LOC_Os11g26160
Os11g0446000	LOC_Os11g25920
Os11g0444900	LOC_Os11g25780
Os11g0444800	None
Os11g0444700	LOC_Os11g25780
Os11g0444000	LOC_Os11g25720
Os11g0443700	LOC_Os11g25700
Os11g0441500	LOC_Os11g25454
Os11g0440866	None
Os11g0440200	LOC_Os11g25330
Os11g0439600	LOC_Os11g25260
Os11g0438500	None
Os11g0435800	LOC_Os11g24840
Os11g0435300	LOC_Os11g24780
Os11g0433900	LOC_Os11g24610
Os11g0433800	LOC_Os11g24590
Os11g0433200	LOC_Os11g24540
Os11g0432800	LOC_Os11g24500
Os11g0431700	LOC_Os11g24374
Os11g0430100	None
Os11g0430000	LOC_Os11g24180
Os11g0429200	None
Os11g0427800	LOC_Os11g24070
Os11g0427700	LOC_Os11g24060
Os11g0425100	LOC_Os11g23770
Os11g0423800	LOC_Os11g23170
Os11g0422100	None
Os11g0421800	LOC_Os11g22960
Os11g0417300	LOC_Os11g22396
Os11g0417266	None
Os11g0379251	None
Os11g0346016	None
Os11g0312400	None
Os11g0312220	LOC_Os11g20790
Os11g0311100	None
Os11g0307550	LOC_Os11g20179
Os11g0307300	LOC_Os11g20160
Os11g0306400	LOC_Os11g20090
Os11g0306300	LOC_Os11g20080
Os11g0304050	LOC_Os11g19880
Os11g0303701	None
Os11g0303600	LOC_Os11g19840
Os11g0302900	LOC_Os11g19764
Os11g0302700	LOC_Os11g19720
Os11g0302500	LOC_Os11g19700
Os11g0300650	None
Os11g0300400	LOC_Os11g19460
Os11g0298400	LOC_Os11g19250
Os11g0298000	LOC_Os11g19240
Os11g0297900	LOC_Os11g19220
Os11g0297800	LOC_Os11g19210
Os11g0297650	None
Os11g0297000	LOC_Os11g19149
Os11g0296500	LOC_Os11g19100
Os11g0295900	LOC_Os11g19060
Os11g0294800	LOC_Os11g18980
Os11g0284950	None
Os11g0284900	LOC_Os11g18170
Os11g0282800	LOC_Os11g17970
Os11g0282700	LOC_Os11g17954
Os11g0278300	LOC_Os11g17720
Os11g0276300	LOC_Os11g17610
Os11g0275500	LOC_Os11g17540
Os11g0275400	LOC_Os11g17530
Os11g0274100	LOC_Os11g17380
Os11g0271100	LOC_Os11g17080
Os11g0271000	LOC_Os11g17070
Os11g0270000	LOC_Os11g16970
Os11g0269700	LOC_Os11g16924
Os11g0267300	LOC_Os11g16580
Os11g0267100	LOC_Os11g16560
Os11g0267000	LOC_Os11g16550
Os11g0266800	LOC_Os11g16540
Os11g0266500	LOC_Os11g16530
Os11g0265200	LOC_Os11g16390
Os11g0265000	LOC_Os11g16370
Os11g0264700	LOC_Os11g16330
Os11g0264600	LOC_Os11g16320
Os11g0263000	LOC_Os11g15700
Os11g0262500	LOC_Os11g15620
Os11g0261500	LOC_Os11g15510
Os11g0261300	None
Os11g0258700	LOC_Os11g15210
Os11g0257800	None
Os11g0257700	LOC_Os11g15130
Os11g0256900	LOC_Os11g15040
Os11g0256050	LOC_Os11g14950
Os11g0256000	LOC_Os11g14950
Os11g0255500	LOC_Os11g14910
Os11g0255300	LOC_Os11g14900
Os11g0252400	LOC_Os11g14570
Os11g0251400	LOC_Os11g14544
Os11g0250000	LOC_Os11g14430
Os11g0249900	LOC_Os11g14420
Os11g0249800	None
Os11g0249300	LOC_Os11g14390
Os11g0248200	LOC_Os11g14300
Os11g0247500	LOC_Os11g14240
Os11g0247400	LOC_Os11g14230
Os11g0247300	LOC_Os11g14220
Os11g0247000	LOC_Os11g14190
Os11g0246900	LOC_Os11g14180
Os11g0246600	LOC_Os11g14170
Os11g0246300	LOC_Os11g14150
Os11g0246200	LOC_Os11g14140
Os11g0246166	None
Os11g0246133	None
Os11g0246100	LOC_Os11g14130
Os11g0245800	LOC_Os11g14110
Os11g0245500	LOC_Os11g14070
Os11g0245000	None
Os11g0244800	LOC_Os11g14010
Os11g0244600	LOC_Os11g14000
Os11g0244300	LOC_Os11g13990
Os11g0244100	LOC_Os11g13970
Os11g0242800	LOC_Os11g13890
Os11g0242400	LOC_Os11g13850
Os11g0242100	LOC_Os11g13810
Os11g0241000	LOC_Os11g13710
Os11g0237300	LOC_Os11g13390
Os11g0236932	None
Os11g0235200	LOC_Os11g12740
Os11g0234200	LOC_Os11g12650
Os11g0234001	LOC_Os11g12630
Os11g0233800	LOC_Os11g12620
Os11g0233400	None
Os11g0233201	LOC_Os11g12560
Os11g0232100	LOC_Os11g12530
Os11g0230700	LOC_Os11g12420
Os11g0230400	LOC_Os11g12410
Os11g0229400	LOC_Os11g12330
Os11g0229000	None
Os11g0227800	LOC_Os11g12050
Os11g0227700	LOC_Os11g12040
Os11g0227250	None
Os11g0227100	LOC_Os11g11990
Os11g0226800	LOC_Os11g11950
Os11g0226700	LOC_Os11g11940
Os11g0226550	None
Os11g0226400	LOC_Os11g11920
Os11g0226201	LOC_Os11g11890
Os11g0225300	LOC_Os11g11810
Os11g0224900	LOC_Os11g11770
Os11g0224040	None
Os11g0223400	LOC_Os11g11580
Os11g0223201	LOC_Os11g11580
Os11g0222900	LOC_Os11g11550
Os11g0222000	LOC_Os11g11490
Os11g0221000	LOC_Os11g11410
Os11g0220800	LOC_Os11g11390
Os11g0219400	LOC_Os11g11240
Os11g0219000	LOC_Os11g11210
Os11g0217300	LOC_Os11g11060
Os11g0216900	LOC_Os11g11050
Os11g0216400	LOC_Os11g11020
Os11g0216000	LOC_Os11g10980
Os11g0215100	LOC_Os11g10870
Os11g0214900	LOC_Os11g10850
Os11g0214001	LOC_Os11g10780
Os11g0213900	LOC_Os11g10780
Os11g0213700	LOC_Os11g10760
Os11g0213000	LOC_Os11g10710
Os11g0212300	LOC_Os11g10640
Os11g0211800	LOC_Os11g10590
Os11g0211700	None
Os11g0211600	LOC_Os11g10570
Os11g0211300	LOC_Os11g10550
Os11g0211200	LOC_Os11g10540
Os11g0210500	LOC_Os11g10510
Os11g0210300	LOC_Os11g10480
Os11g0210000	LOC_Os11g10434
Os11g0209900	None
Os11g0208850	None
Os11g0208100	LOC_Os11g10200
Os11g0208000	LOC_Os11g10180
Os11g0207800	LOC_Os11g10160
Os11g0207200	LOC_Os11g10100
Os11g0207000	LOC_Os11g10060
Os11g0206400	LOC_Os11g10000
Os11g0205500	LOC_Os11g09940
Os11g0203400	None
Os11g0202600	LOC_Os11g09710
Os11g0199600	LOC_Os11g09310
Os11g0199200	LOC_Os11g09280
Os11g0198100	LOC_Os11g09170
Os11g0197600	LOC_Os11g09160
Os11g0197500	LOC_Os11g09150
Os11g0197200	None
Os11g0195600	LOC_Os11g09020
Os11g0195500	LOC_Os11g09010
Os11g0195000	LOC_Os11g08970
Os11g0194900	LOC_Os11g08950
Os11g0189600	LOC_Os11g08569
Os11g0187500	LOC_Os11g08440
Os11g0186900	LOC_Os11g08380
Os11g0186800	LOC_Os11g08370
Os11g0186400	LOC_Os11g08330
Os11g0186200	LOC_Os11g08300
Os11g0185800	None
Os11g0184900	LOC_Os11g08210
Os11g0184100	LOC_Os11g08110
Os11g0183700	LOC_Os11g08080
Os11g0182900	LOC_Os11g08020
Os11g0182400	LOC_Os11g07970
Os11g0182200	LOC_Os11g07960
Os11g0182100	LOC_Os11g07950
Os11g0181400	LOC_Os11g07912
Os11g0181100	LOC_Os11g07910
Os11g0180900	LOC_Os11g07890
Os11g0180600	LOC_Os11g07870
Os11g0180300	LOC_Os11g07860
Os11g0179000	LOC_Os11g07680
Os11g0178200	LOC_Os11g07640
Os11g0177750	None
Os11g0177400	LOC_Os11g07600
Os11g0177200	LOC_Os11g07580
Os11g0176200	LOC_Os11g07500
Os11g0175800	None
Os11g0175400	LOC_Os11g07440
Os11g0173900	LOC_Os11g07270
Os11g0173800	LOC_Os11g07260
Os11g0172300	LOC_Os11g07124
Os11g0172150	LOC_Os11g07100
Os11g0171700	LOC_Os11g07050
Os11g0171400	LOC_Os11g07030
Os11g0171300	LOC_Os11g07020
Os11g0170300	LOC_Os11g06930
Os11g0170200	LOC_Os11g06910
Os11g0169900	LOC_Os11g06890
Os11g0169800	LOC_Os11g06880
Os11g0169600	LOC_Os11g06860
Os11g0169200	LOC_Os11g06820
Os11g0168300	LOC_Os11g06760
Os11g0168200	LOC_Os11g06750
Os11g0167800	LOC_Os11g06720
Os11g0166800	LOC_Os11g06650
Os11g0166100	LOC_Os11g06580
Os11g0163500	LOC_Os11g06410
Os11g0163100	LOC_Os11g06390.6
Os11g0161100	LOC_Os11g06230
Os11g0160850	None
Os11g0160600	LOC_Os11g06180
Os11g0160300	LOC_Os11g06140
Os11g0160100	LOC_Os11g06130
Os11g0159900	LOC_Os11g06100
Os11g0159000	LOC_Os11g06040
Os11g0158400	LOC_Os11g05990
Os11g0157600	LOC_Os11g05930
Os11g0157400	LOC_Os11g05880
Os11g0157200	LOC_Os11g05860
Os11g0156800	LOC_Os11g05820
Os11g0156750	None
Os11g0156700	LOC_Os11g05810
Os11g0156600	LOC_Os11g05800
Os11g0156401	LOC_Os11g05780
Os11g0156300	LOC_Os11g05770
Os11g0156000	LOC_Os11g05740
Os11g0155600	LOC_Os11g05700
Os11g0155500	LOC_Os11g05690
Os11g0155425	None
Os11g0154900	LOC_Os11g05640
Os11g0154300	LOC_Os11g05600
Os11g0153900	LOC_Os11g05570
Os11g0153800	LOC_Os11g05562
Os11g0153700	LOC_Os11g05556
Os11g0153600	LOC_Os11g05552
Os11g0153500	LOC_Os11g05550
Os11g0153300	LOC_Os11g05530
Os11g0153100	LOC_Os11g05494
Os11g0152500	LOC_Os11g05470
Os11g0152400	None
Os11g0151600	LOC_Os11g05394
Os11g0151400	LOC_Os11g05380
Os11g0151300	LOC_Os11g05370
Os11g0150632	LOC_Os11g05310
Os11g0150450	LOC_Os11g05300
Os11g0150200	LOC_Os11g05280
Os11g0149900	LOC_Os11g05240
Os11g0149200	LOC_Os11g05170
Os11g0149100	LOC_Os11g05160
Os11g0148400	LOC_Os11g05100
Os11g0147901	None
Os11g0147800	LOC_Os11g05050
Os11g0147200	LOC_Os11g05000
Os11g0147150	None
Os11g0147000	LOC_Os11g04980
Os11g0146700	LOC_Os11g04950
Os11g0146550	LOC_Os11g04935
Os11g0146200	LOC_Os11g04910
Os11g0146100	LOC_Os11g04900
Os11g0146000	LOC_Os11g04894
Os11g0145700	LOC_Os11g04890
Os11g0145000	LOC_Os11g04840
Os11g0144500	None
Os11g0143400	LOC_Os11g04730
Os11g0143300	LOC_Os11g04720
Os11g0143200	LOC_Os11g04710
Os11g0142101	None
Os11g0141900	LOC_Os11g04600
Os11g0141333	LOC_Os11g04540
Os11g0140700	LOC_Os11g04490
Os11g0140600	LOC_Os11g04480
Os11g0140400	LOC_Os11g04460
Os11g0139700	LOC_Os11g04409
Os11g0139400	LOC_Os11g04380
Os11g0139100	LOC_Os11g04370
Os11g0138300	LOC_Os11g04290
Os11g0137100	LOC_Os11g04200
Os11g0137000	LOC_Os11g04190
Os11g0135400	LOC_Os11g04070
Os11g0134700	LOC_Os11g04010
Os11g0134500	LOC_Os11g03990
Os11g0134300	LOC_Os11g03970
Os11g0134232	LOC_Os11g03970
Os11g0133850	None
Os11g0133500	LOC_Os11g03880
Os11g0133300	LOC_Os11g03860
Os11g0133001	LOC_Os11g03820
Os11g0132700	LOC_Os11g03794
Os11g0131900	LOC_Os11g03730
Os11g0130900	LOC_Os11g03650
Os11g0130600	LOC_Os11g03620
Os11g0130300	LOC_Os11g03590
Os11g0129700	LOC_Os11g03540
Os11g0129301	None
Os11g0128932	None
Os11g0128500	LOC_Os11g03440
Os11g0128300	LOC_Os11g03420
Os11g0128000	LOC_Os11g03410
Os11g0127900	LOC_Os11g03400
Os11g0127800	LOC_Os11g03390
Os11g0127700	LOC_Os11g03380
Os11g0126900	LOC_Os11g03300
Os11g0126100	LOC_Os11g03240
Os11g0125700	LOC_Os11g03220
Os11g0124900	LOC_Os11g03160
Os11g0123600	LOC_Os11g03070
Os11g0122150	LOC_Os11g02860
Os11g0121600	LOC_Os11g02840
Os11g0121500	LOC_Os11g02840
Os11g0121400	LOC_Os11g02830
Os11g0120600	LOC_Os11g02760
Os11g0120200	LOC_Os11g02740
Os11g0119900	LOC_Os11g02720
Os11g0119700	LOC_Os11g02710
Os11g0118800	LOC_Os11g02640
Os11g0118200	LOC_Os11g02600
Os11g0117700	LOC_Os11g02550
Os11g0116900	LOC_Os11g02480
Os11g0116300	LOC_Os11g02440
Os11g0116200	LOC_Os11g02424
Os11g0115800	None
Os11g0115400	LOC_Os11g02389
Os11g0115375	None
Os11g0115350	LOC_Os11g02369
Os11g0115100	LOC_Os11g02350
Os11g0114600	LOC_Os11g02305
Os11g0114300	LOC_Os11g02290
Os11g0114150	LOC_Os11g02270
Os11g0113700	LOC_Os11g02240
Os11g0113300	LOC_Os11g02200
Os11g0113100	LOC_Os11g02180
Os11g0112900	LOC_Os11g02159
Os11g0112800	LOC_Os11g02150
Os11g0112400	LOC_Os11g02130
Os11g0112050	None
Os11g0112000	LOC_Os11g02080
Os11g0110100	LOC_Os11g01890
Os11g0109666	None
Os11g0109000	LOC_Os11g01790
Os11g0108700	LOC_Os11g01730
Os11g0107700	LOC_Os11g01620
Os11g0107600	LOC_Os11g01610
Os11g0107500	LOC_Os11g01600
Os11g0107400	LOC_Os11g01590
Os11g0107266	LOC_Os11g01580
Os11g0106800	LOC_Os11g01540
Os11g0106700	LOC_Os11g01530
Os11g0105750	LOC_Os11g01439
Os11g0105400	LOC_Os11g01420
Os11g0104933	LOC_Os11g01380
Os11g0104900	LOC_Os11g01380
Os11g0104800	LOC_Os11g01370
Os11g0104400	LOC_Os11g01340
Os11g0103800	LOC_Os11g01280
Os11g0103100	LOC_Os11g01220
Os11g0102900	LOC_Os11g01200
Os11g0102700	LOC_Os11g01180
Os11g0100600	LOC_Os11g01040
Os11g0100300	LOC_Os11g01030
Os11g0100200	LOC_Os11g01020
Os11g0100100	LOC_Os11g01010
Os10g0580300	LOC_Os10g42950
Os10g0579850	None
Os10g0579800	LOC_Os10g42900
Os10g0579600	LOC_Os10g42870
Os10g0579100	LOC_Os10g42820
Os10g0578800	LOC_Os10g42780
Os10g0578200	LOC_Os10g42750
Os10g0578050	LOC_Os10g42730
Os10g0578000	LOC_Os10g42724
Os10g0577600	LOC_Os10g42690
Os10g0577400	LOC_Os10g42660
Os10g0577200	LOC_Os10g42650
Os10g0577100	LOC_Os10g42640
Os10g0576900	LOC_Os10g42620
Os10g0576600	LOC_Os10g42610
Os10g0575950	None
Os10g0574500	LOC_Os10g42400
Os10g0573800	LOC_Os10g42299
Os10g0573700	LOC_Os10g42299
Os10g0573400	LOC_Os10g42280
Os10g0573100	LOC_Os10g42250
Os10g0573000	LOC_Os10g42240
Os10g0572900	LOC_Os10g42230
Os10g0572300	LOC_Os10g42190
Os10g0571900	LOC_Os10g42160
Os10g0571600	LOC_Os10g42130
Os10g0571300	LOC_Os10g42110
Os10g0571200	LOC_Os10g42100
Os10g0570800	LOC_Os10g42066
Os10g0569800	LOC_Os10g42020
Os10g0569400	LOC_Os10g41980
Os10g0569200	LOC_Os10g41960
Os10g0569000	LOC_Os10g41940
Os10g0568900	LOC_Os10g41930
Os10g0568300	LOC_Os10g41870
Os10g0568200	None
Os10g0568000	LOC_Os10g41850
Os10g0567800	LOC_Os10g41820
Os10g0566900	LOC_Os10g41730
Os10g0566800	LOC_Os10g41720
Os10g0566400	LOC_Os10g41660
Os10g0566300	LOC_Os10g41650
Os10g0566200	LOC_Os10g41640
Os10g0566050	LOC_Os10g41620
Os10g0565500	LOC_Os10g41580
Os10g0565150	None
Os10g0565000	LOC_Os10g41534
Os10g0564900	LOC_Os10g41520
Os10g0564800	LOC_Os10g41510
Os10g0564500	LOC_Os10g41490
Os10g0564300	LOC_Os10g41470
Os10g0564200	LOC_Os10g41460
Os10g0564100	LOC_Os10g41450
Os10g0563900	LOC_Os10g41430
Os10g0563800	LOC_Os10g41420
Os10g0563600	LOC_Os10g41400
Os10g0563500	LOC_Os10g41390
Os10g0563400	LOC_Os10g41380
Os10g0562500	LOC_Os10g41290
Os10g0561400	LOC_Os10g41200
Os10g0561100	LOC_Os10g41170
Os10g0560400	LOC_Os10g41100
Os10g0560200	LOC_Os10g41083
Os10g0560000	LOC_Os10g41060
Os10g0558900	LOC_Os10g40960
Os10g0558700	LOC_Os10g40934
Os10g0557900	LOC_Os10g40830
Os10g0557700	LOC_Os10g40820
Os10g0556100	LOC_Os10g40730
Os10g0555700	LOC_Os10g40710
Os10g0555651	None
Os10g0555600	LOC_Os10g40700
Os10g0555100	LOC_Os10g40640
Os10g0554200	LOC_Os10g40600
Os10g0554100	LOC_Os10g40590
Os10g0554001	LOC_Os10g40584
Os10g0553800	LOC_Os10g40570
Os10g0552900	LOC_Os10g40540
Os10g0552600	LOC_Os10g40510
Os10g0552200	LOC_Os10g40470
Os10g0551900	LOC_Os10g40440
Os10g0550900	LOC_Os10g40360
Os10g0550200	None
Os10g0549500	LOC_Os10g40200
Os10g0548900	LOC_Os10g40130
Os10g0548600	LOC_Os10g40090
Os10g0548200	None
Os10g0547900	LOC_Os10g40020
Os10g0546900	LOC_Os10g39936
Os10g0546600	LOC_Os10g39930
Os10g0546400	LOC_Os10g39920
Os10g0546200	LOC_Os10g39900
Os10g0545600	LOC_Os10g39850
Os10g0545500	LOC_Os10g39840
Os10g0545100	LOC_Os10g39800
Os10g0545000	LOC_Os10g39790
Os10g0544500	LOC_Os10g39760
Os10g0543800	LOC_Os10g39740
Os10g0542700	LOC_Os10g39660
Os10g0542550	None
Os10g0542400	LOC_Os10g39640
Os10g0541200	LOC_Os10g39540
Os10g0540900	LOC_Os10g39510
Os10g0540800	LOC_Os10g39500
Os10g0540300	LOC_Os10g39470
Os10g0540250	None
Os10g0540100	LOC_Os10g39460
Os10g0539650	None
Os10g0537500	LOC_Os10g39220
Os10g0537300	LOC_Os10g39200
Os10g0536450	None
Os10g0536400	LOC_Os10g39140
Os10g0536100	LOC_Os10g39130
Os10g0535800	LOC_Os10g39100
Os10g0534100	LOC_Os10g38980
Os10g0533900	LOC_Os10g38970
Os10g0533000	LOC_Os10g38900
Os10g0532600	LOC_Os10g38880
Os10g0532200	LOC_Os10g38860
Os10g0532000	LOC_Os10g38834
Os10g0531900	LOC_Os10g38820
Os10g0530900	LOC_Os10g38740
Os10g0530600	LOC_Os10g38720
Os10g0529500	LOC_Os10g38600
Os10g0529400	LOC_Os10g38590
Os10g0528150	None
Os10g0528100	LOC_Os10g38470
Os10g0525800	LOC_Os10g38189
Os10g0525500	LOC_Os10g38150
Os10g0524700	LOC_Os10g38090
Os10g0524600	LOC_Os10g38080
Os10g0524400	LOC_Os10g38060
Os10g0524100	LOC_Os10g38030
Os10g0523201	None
Os10g0523100	LOC_Os10g37899
Os10g0522700	LOC_Os10g37860
Os10g0522400	LOC_Os10g37830
Os10g0522200	None
Os10g0522000	LOC_Os10g37770
Os10g0521500	LOC_Os10g37720
Os10g0521400	LOC_Os10g37710
Os10g0521100	LOC_Os10g37670
Os10g0521000	LOC_Os10g37660
Os10g0519600	LOC_Os10g37520
Os10g0518300	LOC_Os10g37430
Os10g0517800	LOC_Os10g37350
Os10g0517500	LOC_Os10g37340
Os10g0516900	LOC_Os10g37290
Os10g0516400	LOC_Os10g37230
Os10g0516100	LOC_Os10g37180
Os10g0515200	LOC_Os10g37110
Os10g0514550	None
Os10g0514500	LOC_Os10g37050
Os10g0513900	LOC_Os10g36980
Os10g0513200	LOC_Os10g36924
Os10g0512800	LOC_Os10g36880
Os10g0512500	LOC_Os10g36860
Os10g0512400	LOC_Os10g36848
Os10g0512001	None
Os10g0511200	LOC_Os10g36740
Os10g0510400	LOC_Os10g36690
Os10g0510300	LOC_Os10g36680
Os10g0510000	LOC_Os10g36650
Os10g0509900	LOC_Os10g36626
Os10g0509600	LOC_Os10g36610
Os10g0509401	LOC_Os10g36580
Os10g0509100	LOC_Os10g36550
Os10g0508700	LOC_Os10g36500
Os10g0508600	LOC_Os10g36480
Os10g0508500	LOC_Os10g36490
Os10g0508000	LOC_Os10g36390
Os10g0507700	LOC_Os10g36360
Os10g0507600	LOC_Os10g36350
Os10g0507000	LOC_Os10g36270
Os10g0506900	LOC_Os10g36260
Os10g0506800	LOC_Os10g36250
Os10g0505700	LOC_Os10g36170
Os10g0505500	LOC_Os10g36160
Os10g0503800	LOC_Os10g36000
Os10g0503600	LOC_Os10g35980
Os10g0503500	LOC_Os10g35960
Os10g0503100	LOC_Os10g35930
Os10g0502900	LOC_Os10g35920
Os10g0502000	LOC_Os10g35810
Os10g0501500	LOC_Os10g35770
Os10g0501200	LOC_Os10g35750
Os10g0500650	None
Os10g0498900	LOC_Os10g35580
Os10g0498800	LOC_Os10g35570
Os10g0498300	LOC_Os10g35530
Os10g0497800	LOC_Os10g35470
Os10g0497300	LOC_Os10g35436
Os10g0497100	LOC_Os10g35390
Os10g0496900	LOC_Os10g35370
Os10g0495500	LOC_Os10g35280
Os10g0495300	LOC_Os10g35250
Os10g0495200	LOC_Os10g35240
Os10g0495100	LOC_Os10g35230
Os10g0495075	None
Os10g0495000	LOC_Os10g35220
Os10g0494000	LOC_Os10g35150
Os10g0493900	LOC_Os10g35140
Os10g0493800	LOC_Os10g35130
Os10g0493600	LOC_Os10g35110
Os10g0492200	LOC_Os10g35020
Os10g0491900	LOC_Os10g35000
Os10g0491450	None
Os10g0490900	LOC_Os10g34920
Os10g0489900	LOC_Os10g34820
Os10g0488300	LOC_Os10g34680
Os10g0486900	LOC_Os10g34540
Os10g0486600	LOC_Os10g34520
Os10g0486100	LOC_Os10g34480
Os10g0485300	LOC_Os10g34400
Os10g0484900	LOC_Os10g34370
Os10g0484300	LOC_Os10g34310
Os10g0483500	LOC_Os10g34230
Os10g0482900	LOC_Os10g34170
Os10g0482000	LOC_Os10g34083
Os10g0481450	LOC_Os10g34030
Os10g0481200	LOC_Os10g34010
Os10g0479500	LOC_Os10g33900
Os10g0478900	LOC_Os10g33855
Os10g0478300	LOC_Os10g33810
Os10g0477600	LOC_Os10g33760
Os10g0477100	LOC_Os10g33720
Os10g0476500	LOC_Os10g33670
Os10g0476400	LOC_Os10g33660
Os10g0474800	LOC_Os10g33520
Os10g0474100	LOC_Os10g33460
Os10g0473950	LOC_Os10g33440
Os10g0472900	LOC_Os10g33370
Os10g0471300	LOC_Os10g33270
Os10g0471100	LOC_Os10g33250
Os10g0470900	LOC_Os10g33230
Os10g0470700	LOC_Os10g33210
Os10g0469700	LOC_Os10g33140
Os10g0468800	LOC_Os10g33060
Os10g0467900	LOC_Os10g32990
Os10g0467800	LOC_Os10g32980
Os10g0466300	LOC_Os10g32880
Os10g0466200	LOC_Os10g32870
Os10g0466000	LOC_Os10g32850
Os10g0465000	LOC_Os10g32770
Os10g0464800	LOC_Os10g32760
Os10g0464500	LOC_Os10g32740
Os10g0464300	LOC_Os10g32720
Os10g0464100	LOC_Os10g32710
Os10g0463800	LOC_Os10g32680
Os10g0463600	None
Os10g0462900	LOC_Os10g32550
Os10g0462800	LOC_Os10g32540
Os10g0462300	LOC_Os10g32470
Os10g0461400	LOC_Os10g32400
Os10g0461100	LOC_Os10g32348
Os10g0460900	LOC_Os10g32300
Os10g0459700	LOC_Os10g32170
Os10g0459600	LOC_Os10g32160
Os10g0459300	LOC_Os10g32110
Os10g0458900	LOC_Os10g32080
Os10g0458700	LOC_Os10g32060
Os10g0457600	LOC_Os10g31950
Os10g0457400	LOC_Os10g31930
Os10g0457200	LOC_Os10g31910
Os10g0456800	LOC_Os10g31850
Os10g0456600	LOC_Os10g31830
Os10g0456500	LOC_Os10g31820
Os10g0454300	LOC_Os10g31670
Os10g0454200	LOC_Os10g31660
Os10g0453000	LOC_Os10g31540
Os10g0452800	LOC_Os10g31520
Os10g0452700	LOC_Os10g31510
Os10g0452500	LOC_Os10g31500
Os10g0452100	LOC_Os10g31460
Os10g0451900	LOC_Os10g31440
Os10g0451700	LOC_Os10g31420
Os10g0450900	LOC_Os10g31330
Os10g0450800	LOC_Os10g31320
Os10g0450400	LOC_Os10g31290
Os10g0447400	None
Os10g0445600	LOC_Os10g30870
Os10g0445500	LOC_Os10g30860
Os10g0444850	None
Os10g0444400	LOC_Os10g30750
Os10g0443200	LOC_Os10g30640
Os10g0442800	LOC_Os10g30600
Os10g0442700	LOC_Os10g30590
Os10g0442600	LOC_Os10g30580
Os10g0442532	None
Os10g0442100	LOC_Os10g30550
Os10g0442000	LOC_Os10g30540
Os10g0439700	LOC_Os10g30380
Os10g0439682	None
Os10g0439650	None
Os10g0439600	LOC_Os10g30370
Os10g0438500	LOC_Os10g30280
Os10g0437500	LOC_Os10g30150
Os10g0437200	LOC_Os10g30100
Os10g0437100	LOC_Os10g30090
Os10g0437000	LOC_Os10g30080
Os10g0436900	LOC_Os10g30070
Os10g0436800	LOC_Os10g30054
Os10g0433200	LOC_Os10g29700
Os10g0432300	LOC_Os10g29660
Os10g0431900	LOC_Os10g29620
Os10g0426300	LOC_Os10g29090
Os10g0422800	LOC_Os10g28700
Os10g0422600	LOC_Os10g28680
Os10g0422500	LOC_Os10g28660
Os10g0422200	LOC_Os10g28630
Os10g0421800	LOC_Os10g28600
Os10g0420400	LOC_Os10g28440
Os10g0420332	None
Os10g0420000	LOC_Os10g28410
Os10g0419400	LOC_Os10g28350
Os10g0419100	LOC_Os10g28320
Os10g0418000	LOC_Os10g28230
Os10g0417800	LOC_Os10g28210
Os10g0416800	LOC_Os10g28120
Os10g0416500	LOC_Os10g28080
Os10g0416100	LOC_Os10g28050
Os10g0415800	LOC_Os10g28030
Os10g0415300	LOC_Os10g28000
Os10g0415200	LOC_Os10g27990
Os10g0414700	LOC_Os10g27470
Os10g0413500	LOC_Os10g27340
Os10g0413101	LOC_Os10g27310
Os10g0411700	LOC_Os10g27174
Os10g0409900	LOC_Os10g26990
Os10g0409400	LOC_Os10g26940
Os10g0407200	LOC_Os10g26700
Os10g0407100	LOC_Os10g26690
Os10g0407000	LOC_Os10g26680
Os10g0406800	LOC_Os10g26660
Os10g0406350	None
Os10g0406300	LOC_Os10g26620
Os10g0406200	LOC_Os10g26610
Os10g0405600	LOC_Os10g26570
Os10g0405500	LOC_Os10g26560
Os10g0405100	LOC_Os10g26520
Os10g0403700	LOC_Os10g26390
Os10g0403000	LOC_Os10g26340
Os10g0402200	LOC_Os10g26280
Os10g0401000	LOC_Os10g26150
Os10g0400800	LOC_Os10g26130
Os10g0400200	LOC_Os10g26060
Os10g0400100	LOC_Os10g26050
Os10g0398600	LOC_Os10g25900
Os10g0397800	LOC_Os10g25830
Os10g0397200	LOC_Os10g25770
Os10g0396300	LOC_Os10g25674
Os10g0396100	LOC_Os10g25660
Os10g0395200	LOC_Os10g25570
Os10g0394200	LOC_Os10g25450
Os10g0394000	LOC_Os10g25420
Os10g0393700	LOC_Os10g25380
Os10g0393100	LOC_Os10g25360
Os10g0392500	LOC_Os10g25300
Os10g0392400	LOC_Os10g25290
Os10g0391500	None
Os10g0391400	LOC_Os10g25230
Os10g0391300	LOC_Os10g25220
Os10g0391200	LOC_Os10g25210
Os10g0390900	LOC_Os10g25180
Os10g0390701	LOC_Os10g25150
Os10g0390600	LOC_Os10g25140
Os10g0390500	LOC_Os10g25130
Os10g0390000	LOC_Os10g25100
Os10g0389800	LOC_Os10g25090
Os10g0389500	LOC_Os10g25060
Os10g0389300	LOC_Os10g25040
Os10g0389100	LOC_Os10g25020
Os10g0388600	LOC_Os10g24954
Os10g0388200	LOC_Os10g24900
Os10g0387000	LOC_Os10g24810
Os10g0382400	LOC_Os10g24094
Os10g0381601	LOC_Os10g24004
Os10g0380100	LOC_Os10g23820
Os10g0379854	None
Os10g0379100	LOC_Os10g23310
Os10g0378300	LOC_Os10g23204
Os10g0377800	LOC_Os10g23120
Os10g0377300	LOC_Os10g23090
Os10g0377150	None
Os10g0376900	LOC_Os10g23050
Os10g0372800	LOC_Os10g22730
Os10g0372700	LOC_Os10g22720
Os10g0370800	LOC_Os10g22570
Os10g0370700	LOC_Os10g22560
Os10g0370600	None
Os10g0370000	LOC_Os10g22460
Os10g0365800	LOC_Os10g22100
Os10g0365200	LOC_Os10g22070
Os10g0364800	None
Os10g0363650	LOC_Os10g21940
Os10g0363300	LOC_Os10g21910
Os10g0362700	LOC_Os10g21860
Os10g0361876	LOC_Os10g21784
Os10g0361300	LOC_Os10g21700
Os10g0360900	LOC_Os10g21660
Os10g0360100	LOC_Os10g21590
Os10g0358600	LOC_Os10g21460
Os10g0358200	LOC_Os10g21400
Os10g0355800	LOC_Os10g21264
Os10g0351500	LOC_Os10g21090
Os10g0347800	LOC_Os10g20710
Os10g0345701	LOC_Os10g20510
Os10g0345650	None
Os10g0345100	LOC_Os10g20470
Os10g0344900	LOC_Os10g20450
Os10g0344800	None
Os10g0343500	None
Os10g0343200	LOC_Os10g20250
Os10g0343050	LOC_Os10g20235
Os10g0341800	None
Os10g0341750	None
Os10g0340100	LOC_Os10g19910
Os10g0339600	LOC_Os10g19880
Os10g0337500	LOC_Os10g19180
Os10g0336700	None
Os10g0336600	None
Os10g0330300	LOC_Os10g18364
Os10g0330000	LOC_Os10g18340
Os10g0328100	LOC_Os10g18090
Os10g0327800	LOC_Os10g18070
Os10g0327300	LOC_Os10g17990
Os10g0327000	LOC_Os10g17960
Os10g0323500	LOC_Os10g17650
Os10g0321700	LOC_Os10g17454
Os10g0320100	LOC_Os10g17260
Os10g0317900	LOC_Os10g16974
Os10g0317300	LOC_Os10g16930
Os10g0213966	LOC_Os10g15340
Os10g0213700	LOC_Os10g15300
Os10g0213100	LOC_Os10g15240
Os10g0209566	None
Os10g0208600	LOC_Os10g14194
Os10g0207400	LOC_Os10g14011
Os10g0204400	LOC_Os10g13700
Os10g0204300	LOC_Os10g13694
Os10g0204100	LOC_Os10g13670
Os10g0203600	LOC_Os10g13630
Os10g0203000	LOC_Os10g13550
Os10g0200000	LOC_Os10g12620
Os10g0199500	LOC_Os10g12500
Os10g0198900	LOC_Os10g12390
Os10g0198100	LOC_Os10g12290
Os10g0195250	LOC_Os10g11889
Os10g0195100	LOC_Os10g11870
Os10g0195000	LOC_Os10g11860
Os10g0191900	LOC_Os10g11580
Os10g0191300	LOC_Os10g11500
Os10g0191201	None
Os10g0190000	LOC_Os10g11260
Os10g0189600	LOC_Os10g11200
Os10g0189100	LOC_Os10g11140
Os10g0188300	LOC_Os10g11034
Os10g0188275	None
Os10g0188250	LOC_Os10g11022
Os10g0188133	None
Os10g0188100	LOC_Os10g10990
Os10g0188000	LOC_Os10g10980
Os10g0187500	LOC_Os10g10870
Os10g0187454	None
Os10g0184300	LOC_Os10g10500
Os10g0184250	None
Os10g0184200	LOC_Os10g10480
Os10g0183000	LOC_Os10g10360
Os10g0182000	LOC_Os10g10244
Os10g0181600	LOC_Os10g10180
Os10g0181200	LOC_Os10g10175
Os10g0180000	LOC_Os10g10080
Os10g0178800	LOC_Os10g10030
Os10g0178200	LOC_Os10g09930
Os10g0178101	None
Os10g0177400	LOC_Os10g09870
Os10g0171500	LOC_Os10g09110
Os10g0170200	LOC_Os10g08930
Os10g0169800	LOC_Os10g08840
Os10g0169200	LOC_Os10g08780
Os10g0168900	LOC_Os10g08754
Os10g0167600	LOC_Os10g08580
Os10g0167300	LOC_Os10g08550
Os10g0165400	None
Os10g0164500	LOC_Os10g08260
Os10g0163340	LOC_Os10g08022
Os10g0163310	LOC_Os10g08018
Os10g0163130	LOC_Os10g07998
Os10g0162980	LOC_Os10g07970
Os10g0162834	LOC_Os10g07538
Os10g0162832	LOC_Os10g07534
Os10g0162500	None
Os10g0162400	LOC_Os10g07480
Os10g0162300	LOC_Os10g07470
Os10g0162100	LOC_Os10g07450
Os10g0161800	LOC_Os10g07440
Os10g0161700	LOC_Os10g07430
Os10g0161625	None
Os10g0161400	LOC_Os10g07400
Os10g0161100	None
Os10g0160700	LOC_Os10g07380
Os10g0160600	LOC_Os10g07340
Os10g0160100	LOC_Os10g07290
Os10g0159800	LOC_Os10g07229
Os10g0159033	LOC_Os10g07114
Os10g0158700	LOC_Os10g07080
Os10g0156300	None
Os10g0155800	LOC_Os10g06760
Os10g0155700	LOC_Os10g06740
Os10g0155500	LOC_Os10g06720
Os10g0155400	LOC_Os10g06710
Os10g0155300	LOC_Os10g06700
Os10g0154600	LOC_Os10g06610
Os10g0154500	LOC_Os10g06580
Os10g0154000	LOC_Os10g06540
Os10g0153900	LOC_Os10g06510
Os10g0150800	LOC_Os10g06000
Os10g0150700	LOC_Os10g05990
Os10g0150600	LOC_Os10g05980
Os10g0150400	LOC_Os10g05970
Os10g0148800	LOC_Os10g05800
Os10g0148100	LOC_Os10g05750
Os10g0147400	LOC_Os10g05690
Os10g0147200	LOC_Os10g05660
Os10g0146200	LOC_Os10g05600
Os10g0145200	LOC_Os10g05540
Os10g0142900	LOC_Os10g05290
Os10g0141700	LOC_Os10g05210
Os10g0141500	LOC_Os10g05190
Os10g0140200	LOC_Os10g05069
Os10g0139700	LOC_Os10g05020
Os10g0139500	LOC_Os10g05000
Os10g0137700	None
Os10g0135400	LOC_Os10g04600
Os10g0135250	None
Os10g0133500	LOC_Os10g04429
Os10g0132901	None
Os10g0132800	None
Os10g0132700	LOC_Os10g04342
Os10g0132500	LOC_Os10g04290
Os10g0132400	LOC_Os10g04280
Os10g0132300	LOC_Os10g04270
Os10g0131800	LOC_Os10g04180
Os10g0131100	LOC_Os10g04120
Os10g0131000	LOC_Os10g04110
Os10g0130900	None
Os10g0130800	LOC_Os10g04090
Os10g0130701	LOC_Os10g04074
Os10g0130600	LOC_Os10g04060
Os10g0130200	LOC_Os10g04020
Os10g0129200	LOC_Os10g03950
Os10g0129100	LOC_Os10g03930
Os10g0128400	LOC_Os10g03890
Os10g0128200	LOC_Os10g03870
Os10g0126700	LOC_Os10g03750
Os10g0126600	LOC_Os10g03740
Os10g0125700	None
Os10g0125600	LOC_Os10g03669
Os10g0124700	LOC_Os10g03620
Os10g0124150	None
Os10g0124000	LOC_Os10g03540
Os10g0123200	None
Os10g0122500	LOC_Os10g03390
Os10g0122400	None
Os10g0122200	None
Os10g0122000	LOC_Os10g03320
Os10g0120300	LOC_Os10g03100
Os10g0119100	None
[truncated: 24,667 more rows]

## Sheet: Sheet1
RAP	MSU
ENsRNA049464904	NA
ENsRNA049465109	NA
ENsRNA049465125	NA
ENsRNA049465687	NA
ENsRNA049466338	NA
ENsRNA049466512	NA
ENsRNA049467117	NA
ENsRNA049467868	NA
ENsRNA049468369	NA
ENsRNA049468744	NA
ENsRNA049469250	NA
ENsRNA049471043	NA
ENsRNA049471090	NA
ENsRNA049471102	NA
ENsRNA049471251	NA
ENsRNA049471305	NA
ENsRNA049471356	NA
ENsRNA049471381	NA
ENsRNA049471707	NA
ENsRNA049471772	NA
ENsRNA049471778	NA
ENsRNA049471882	NA
ENsRNA049472419	NA
ENsRNA049472543	NA
ENsRNA049472772	NA
ENsRNA049472799	NA
ENsRNA049474050	NA
ENsRNA049474126	NA
ENsRNA049475677	NA
ENsRNA049475944	NA
ENsRNA049476430	NA
ENsRNA049476444	NA
ENsRNA049476447	NA
ENsRNA049476452	NA
ENsRNA049476502	NA
ENsRNA049476508	NA
ENsRNA049476514	NA
EPlOsAg00000000028	NA
EPlOsAg00000000029	NA
EPlOsAg00000000031	NA
EPlOsAg00000000033	NA
EPlOsAg00000000155	NA
EPlOsAg00000000169	NA
EPlOsAg00000000170	NA
EPlOsAg00000000193	NA
EPlOsAg00000000194	NA
EPlOsAg00000000225	NA
EPlOsAg00000000281	NA
EPlOsAg00000000326	NA
EPlOsAg00000000354	NA
EPlOsAg00000000395	NA
EPlOsAg00000000427	NA
EPlOsAg00000000457	NA
EPlOsAg00000000551	NA
EPlOsAg00000000569	NA
EPlOsAg00000000623	NA
EPlOsAg00000000759	NA
EPlOsAg00000000802	NA
EPlOsAg00000000811	NA
EPlOsAg00000000924	NA
EPlOsAg00000000942	NA
EPlOsAg00000000975	NA
EPlOsAg00000000996	NA
EPlOsAg00000001065	NA
EPlOsAg00000001076	NA
EPlOsAg00000001087	NA
EPlOsAg00000001099	NA
EPlOsAg00000001110	NA
EPlOsAg00000001121	NA
EPlOsAg00000001158	NA
EPlOsAg00000001365	NA
EPlOsAg00000001504	NA
EPlOsAg00000001602	NA
EPlOsAg00000001731	NA
EPlOsAg00000001753	NA
EPlOsAg00000001976	NA
EPlOsAg00000002130	NA
EPlOsAg00000002138	NA
EPlOsAg00000002147	NA
EPlOsAg00000002156	NA
EPlOsAg00000002161	NA
EPlOsAg00000002206	NA
EPlOsAg00000002272	NA
EPlOsAg00000002279	NA
EPlOsAg00000002291	NA
EPlOsAg00000002294	NA
EPlOsAg00000002308	NA
EPlOsAg00000002377	NA
EPlOsAg00000002392	NA
EPlOsAg00000002430	NA
EPlOsAg00000002498	NA
EPlOsAg00000002531	NA
EPlOsAg00000002701	NA
EPlOsAg00000002820	NA
EPlOsAg00000002824	NA
EPlOsAg00000003014	NA
EPlOsAg00000003129	NA
EPlOsAg00000003182	NA
EPlOsAg00000003184	NA
EPlOsAg00000003194	NA
EPlOsAg00000003214	NA
EPlOsAg00000003215	NA
EPlOsAg00000003235	NA
EPlOsAg00000003289	NA
EPlOsAg00000003326	NA
EPlOsAg00000003367	NA
EPlOsAg00000003370	NA
EPlOsAg00000003433	NA
EPlOsAg00000003441	NA
EPlOsAg00000003498	NA
EPlOsAg00000003507	NA
EPlOsAg00000003548	NA
EPlOsAg00000003558	NA
EPlOsAg00000003631	NA
EPlOsAg00000003679	NA
EPlOsAg00000003705	NA
EPlOsAg00000003756	NA
EPlOsAg00000003819	NA
EPlOsAg00000003860	NA
EPlOsAg00000003861	NA
EPlOsAg00000003867	NA
EPlOsAg00000003880	NA
EPlOsAg00000003900	NA
EPlOsAg00000003939	NA
EPlOsAg00000003946	NA
EPlOsAg00000003952	NA
EPlOsAg00000003963	NA
EPlOsAg00000003975	NA
EPlOsAg00000003986	NA
EPlOsAg00000004084	NA
EPlOsAg00000004093	NA
EPlOsAg00000004303	NA
EPlOsAg00000004322	NA
EPlOsAg00000004406	NA
EPlOsAg00000004429	NA
EPlOsAg00000004439	NA
EPlOsAg00000004482	NA
EPlOsAg00000004492	NA
EPlOsAg00000004499	NA
EPlOsAg00000004572	NA
EPlOsAg00000004652	NA
EPlOsAg00000004660	NA
EPlOsAg00000004661	NA
EPlOsAg00000004670	NA
EPlOsAg00000004696	NA
EPlOsAg00000004728	NA
EPlOsAg00000005110	NA
EPlOsAg00000005310	NA
EPlOsAg00000005531	NA
EPlOsAg00000005592	NA
EPlOsAg00000005747	NA
EPlOsAg00000005958	NA
EPlOsAg00000006020	NA
EPlOsAg00000006199	NA
EPlOsAg00000006543	NA
EPlOsAg00000006751	NA
EPlOsAg00000006827	NA
EPlOsAg00000006911	NA
EPlOsAg00000006912	NA
EPlOsAg00000006913	NA
EPlOsAg00000006914	NA
EPlOsAg00000007068	NA
EPlOsAg00000007077	NA
EPlOsAg00000007169	NA
EPlOsAg00000007186	NA
EPlOsAg00000007207	NA
EPlOsAg00000007268	NA
EPlOsAg00000007269	NA
EPlOsAg00000007300	NA
EPlOsAg00000007309	NA
EPlOsAg00000007323	NA
EPlOsAg00000007324	NA
EPlOsAg00000007333	NA
EPlOsAg00000007343	NA
EPlOsAg00000007344	NA
EPlOsAg00000007408	NA
EPlOsAg00000007445	NA
EPlOsAg00000007447	NA
EPlOsAg00000007479	NA
EPlOsAg00000007493	NA
EPlOsAg00000007851	NA
EPlOsAg00000007932	NA
EPlOsAg00000008023	NA
EPlOsAg00000008053	NA
EPlOsAg00000008055	NA
EPlOsAg00000008059	NA
EPlOsAg00000008064	NA
EPlOsAg00000008075	NA
EPlOsAg00000008077	NA
EPlOsAg00000008086	NA
EPlOsAg00000008089	NA
EPlOsAg00000008105	NA
EPlOsAg00000008114	NA
EPlOsAg00000008128	NA
EPlOsAg00000008157	NA
EPlOsAg00000008158	NA
EPlOsAg00000008159	NA
EPlOsAg00000008164	NA
EPlOsAg00000008199	NA
EPlOsAg00000008202	NA
EPlOsAg00000008207	NA
EPlOsAg00000008214	NA
EPlOsAg00000008216	NA
EPlOsAg00000008217	NA
EPlOsAg00000008218	NA
EPlOsAg00000008230	NA
EPlOsAg00000008235	NA
EPlOsAg00000008250	NA
EPlOsAg00000008252	NA
EPlOsAg00000008393	NA
EPlOsAg00000008412	NA
EPlOsAg00000008413	NA
EPlOsAg00000008417	NA
EPlOsAg00000008422	NA
EPlOsAg00000008463	NA
EPlOsAg00000008465	NA
EPlOsAg00000008467	NA
EPlOsAg00000008468	NA
EPlOsAg00000008492	NA
EPlOsAg00000008495	NA
EPlOsAg00000008496	NA
EPlOsAg00000008501	NA
EPlOsAg00000008502	NA
EPlOsAg00000008503	NA
EPlOsAg00000008504	NA
EPlOsAg00000008506	NA
EPlOsAg00000008507	NA
EPlOsAg00000008508	NA
EPlOsAg00000008509	NA
EPlOsAg00000008513	NA
EPlOsAg00000008514	NA
EPlOsAg00000008516	NA
EPlOsAg00000008517	NA
EPlOsAg00000008518	NA
EPlOsAg00000008519	NA
EPlOsAg00000008521	NA
EPlOsAg00000008528	NA
EPlOsAg00000008535	NA
EPlOsAg00000008541	NA
EPlOsAg00000008543	NA
EPlOsAg00000008546	NA
EPlOsAg00000008547	NA
EPlOsAg00000008548	NA
EPlOsAg00000008549	NA
EPlOsAg00000008550	NA
EPlOsAg00000008551	NA
EPlOsAg00000008552	NA
EPlOsAg00000008553	NA
EPlOsAg00000008554	NA
EPlOsAg00000008557	NA
EPlOsAg00000008558	NA
EPlOsAg00000008560	NA
EPlOsAg00000008561	NA
EPlOsAg00000008562	NA
EPlOsAg00000008564	NA
EPlOsAg00000008565	NA
EPlOsAg00000008567	NA
EPlOsAg00000008568	NA
EPlOsAg00000008569	NA
EPlOsAg00000008592	NA
EPlOsAg00000008653	NA
EPlOsAg00000008676	NA
EPlOsAg00000008921	NA
EPlOsAg00000008950	NA
EPlOsAg00000008951	NA
EPlOsAg00000008962	NA
EPlOsAg00000009004	NA
EPlOsAg00000009027	NA
EPlOsAg00000009031	NA
EPlOsAg00000009034	NA
EPlOsAg00000009044	NA
EPlOsAg00000009054	NA
EPlOsAg00000009082	NA
EPlOsAg00000009084	NA
EPlOsAg00000009133	NA
EPlOsAg00000009134	NA
EPlOsAg00000009184	NA
EPlOsAg00000009188	NA
EPlOsAg00000009216	NA
EPlOsAg00000009224	NA
EPlOsAg00000009260	NA
EPlOsAg00000009263	NA
EPlOsAg00000009304	NA
EPlOsAg00000009326	NA
EPlOsAg00000009343	NA
EPlOsAg00000009394	NA
EPlOsAg00000009433	NA
EPlOsAg00000009442	NA
EPlOsAg00000009486	NA
EPlOsAg00000009546	NA
EPlOsAg00000009637	NA
EPlOsAg00000009772	NA
EPlOsAg00000009791	NA
EPlOsAg00000009862	NA
EPlOsAg00000009875	NA
EPlOsAg00000009883	NA
EPlOsAg00000009893	NA
EPlOsAg00000009940	NA
EPlOsAg00000009946	NA
EPlOsAg00000009966	NA
EPlOsAg00000009978	NA
EPlOsAg00000010031	NA
EPlOsAg00000010038	NA
EPlOsAg00000010306	NA
EPlOsAg00000010308	NA
EPlOsAg00000010309	NA
EPlOsAg00000010343	NA
EPlOsAg00000010431	NA
EPlOsAg00000010451	NA
EPlOsAg00000010467	NA
EPlOsAg00000010472	NA
EPlOsAg00000010525	NA
EPlOsAg00000010532	NA
EPlOsAg00000010534	NA
EPlOsAg00000010535	NA
EPlOsAg00000010536	NA
EPlOsAg00000010549	NA
EPlOsAg00000010575	NA
EPlOsAg00000010604	NA
EPlOsAg00000010625	NA
EPlOsAg00000010655	NA
EPlOsAg00000010674	NA
EPlOsAg00000010681	NA
EPlOsAg00000010852	NA
EPlOsAg00000010857	NA
EPlOsAg00000011016	NA
EPlOsAg00000011021	NA
EPlOsAg00000011131	NA
EPlOsAg00000011161	NA
EPlOsAg00000011210	NA
EPlOsAg00000011224	NA
EPlOsAg00000011286	NA
EPlOsAg00000011374	NA
EPlOsAg00000011376	NA
EPlOsAg00000011386	NA
EPlOsAg00000011432	NA
EPlOsAg00000011448	NA
EPlOsAg00000011469	NA
EPlOsAg00000011585	NA
EPlOsAg00000011880	NA
EPlOsAg00000011898	NA
EPlOsAg00000011916	NA
EPlOsAg00000011983	NA
EPlOsAg00000011996	NA
EPlOsAg00000012009	NA
EPlOsAg00000012034	NA
EPlOsAg00000012068	NA
EPlOsAg00000012264	NA
EPlOsAg00000012295	NA
EPlOsAg00000012400	NA
EPlOsAg00000012461	NA
EPlOsAg00000012462	NA
EPlOsAg00000012494	NA
EPlOsAg00000012564	NA
EPlOsAg00000012580	NA
EPlOsAg00000012767	NA
EPlOsAg00000012768	NA
EPlOsAg00000012769	NA
EPlOsAg00000012798	NA
EPlOsAg00000012844	NA
EPlOsAg00000012934	NA
EPlOsAg00000012955	NA
EPlOsAg00000013037	NA
EPlOsAg00000013105	NA
EPlOsAg00000013199	NA
EPlOsAg00000013243	NA
EPlOsAg00000013310	NA
EPlOsAg00000013385	NA
EPlOsAg00000013406	NA
EPlOsAg00000013409	NA
EPlOsAg00000013411	NA
EPlOsAg00000013415	NA
EPlOsAg00000013417	NA
EPlOsAg00000013464	NA
EPlOsAg00000013467	NA
EPlOsAg00000013519	NA
EPlOsAg00000013550	NA
EPlOsAg00000013698	NA
EPlOsAg00000013933	NA
EPlOsAg00000013959	NA
EPlOsAg00000014069	NA
EPlOsAg00000014188	NA
EPlOsAg00000014216	NA
EPlOsAg00000014221	NA
EPlOsAg00000014295	NA
EPlOsAg00000014457	NA
EPlOsAg00000014458	NA
EPlOsAg00000014482	NA
EPlOsAg00000014487	NA
EPlOsAg00000014554	NA
EPlOsAg00000014687	NA
EPlOsAg00000014731	NA
EPlOsAg00000014866	NA
EPlOsAg00000014926	NA
EPlOsAg00000014974	NA
EPlOsAg00000015107	NA
EPlOsAg00000015123	NA
EPlOsAg00000015212	NA
EPlOsAg00000015218	NA
EPlOsAg00000015278	NA
EPlOsAg00000015299	NA
EPlOsAg00000015344	NA
EPlOsAg00000015360	NA
EPlOsAg00000015366	NA
EPlOsAg00000015367	NA
EPlOsAg00000015498	NA
EPlOsAg00000015595	NA
EPlOsAg00000015823	NA
EPlOsAg00000015910	NA
EPlOsAg00000015917	NA
EPlOsAg00000015978	NA
EPlOsAg00000015981	NA
EPlOsAg00000015990	NA
EPlOsAg00000015996	NA
EPlOsAg00000016034	NA
EPlOsAg00000016148	NA
EPlOsAg00000016232	NA
EPlOsAg00000016280	NA
EPlOsAg00000016294	NA
EPlOsAg00000016450	NA
EPlOsAg00000016533	NA
EPlOsAg00000016535	NA
EPlOsAg00000016604	NA
EPlOsAg00000016612	NA
EPlOsAg00000016621	NA
EPlOsAg00000016634	NA
EPlOsAg00000016654	NA
EPlOsAg00000016783	NA
EPlOsAg00000016806	NA
EPlOsAg00000016807	NA
EPlOsAg00000016822	NA
EPlOsAg00000016824	NA
EPlOsAg00000016825	NA
EPlOsAg00000016826	NA
EPlOsAg00000016827	NA
EPlOsAg00000016842	NA
EPlOsAg00000016878	NA
EPlOsAg00000016942	NA
EPlOsAg00000016953	NA
EPlOsAg00000016954	NA
EPlOsAg00000016971	NA
EPlOsAg00000016976	NA
EPlOsAg00000017020	NA
EPlOsAg00000017090	NA
EPlOsAg00000017113	NA
EPlOsAg00000017145	NA
EPlOsAg00000017188	NA
EPlOsAg00000017265	NA
EPlOsAg00000017349	NA
EPlOsAg00000017421	NA
EPlOsAg00000017618	NA
EPlOsAg00000017842	NA
EPlOsAg00000018038	NA
EPlOsAg00000018051	NA
EPlOsAg00000018109	NA
EPlOsAg00000018118	NA
EPlOsAg00000018162	NA
EPlOsAg00000018170	NA
EPlOsAg00000018248	NA
EPlOsAg00000018296	NA
EPlOsAg00000018315	NA
EPlOsAg00000018356	NA
EPlOsAg00000018418	NA
EPlOsAg00000018440	NA
EPlOsAg00000018489	NA
EPlOsAg00000018500	NA
EPlOsAg00000018644	NA
EPlOsAg00000018683	NA
EPlOsAg00000018686	NA
EPlOsAg00000018727	NA
EPlOsAg00000018795	NA
EPlOsAg00000018833	NA
EPlOsAg00000018891	NA
EPlOsAg00000018916	NA
EPlOsAg00000018941	NA
EPlOsAg00000019013	NA
EPlOsAg00000019041	NA
EPlOsAg00000019056	NA
EPlOsAg00000019073	NA
EPlOsAg00000019095	NA
EPlOsAg00000019203	NA
EPlOsAg00000019237	NA
EPlOsAg00000019241	NA
EPlOsAg00000019245	NA
EPlOsAg00000019311	NA
EPlOsAg00000019326	NA
EPlOsAg00000019387	NA
EPlOsAg00000019410	NA
EPlOsAg00000019429	NA
EPlOsAg00000019468	NA
EPlOsAg00000019472	NA
EPlOsAg00000019492	NA
EPlOsAg00000019494	NA
EPlOsAg00000019621	NA
EPlOsAg00000019699	NA
EPlOsAg00000019843	NA
EPlOsAg00000019866	NA
EPlOsAg00000019877	NA
EPlOsAg00000019888	NA
EPlOsAg00000019899	NA
EPlOsAg00000019910	NA
EPlOsAg00000019921	NA
EPlOsAg00000019932	NA
EPlOsAg00000019954	NA
EPlOsAg00000019955	NA
EPlOsAg00000019966	NA
EPlOsAg00000019988	NA
EPlOsAg00000020010	NA
EPlOsAg00000020032	NA
EPlOsAg00000020065	NA
EPlOsAg00000020066	NA
EPlOsAg00000020077	NA
EPlOsAg00000020088	NA
EPlOsAg00000020099	NA
EPlOsAg00000020121	NA
EPlOsAg00000020154	NA
EPlOsAg00000020279	NA
EPlOsAg00000020330	NA
EPlOsAg00000020420	NA
EPlOsAg00000020521	NA
EPlOsAg00000020535	NA
EPlOsAg00000020581	NA
EPlOsAg00000020608	NA
EPlOsAg00000020638	NA
EPlOsAg00000020773	NA
EPlOsAg00000020789	NA
EPlOsAg00000020815	NA
EPlOsAg00000020872	NA
EPlOsAg00000021027	NA
EPlOsAg00000021057	NA
EPlOsAg00000021095	NA
EPlOsAg00000021164	NA
EPlOsAg00000021244	NA
EPlOsAg00000021288	NA
EPlOsAg00000021387	NA
EPlOsAg00000021470	NA
EPlOsAg00000021490	NA
EPlOsAg00000021588	NA
EPlOsAg00000021633	NA
EPlOsAg00000021753	NA
EPlOsAg00000021761	NA
EPlOsAg00000021869	NA
EPlOsAg00000021889	NA
EPlOsAg00000022432	NA
EPlOsAg00000022557	NA
EPlOsAg00000022578	NA
EPlOsAg00000022598	NA
EPlOsAg00000022641	NA
EPlOsAg00000022652	NA
EPlOsAg00000022655	NA
EPlOsAg00000022670	NA
EPlOsAg00000022683	NA
EPlOsAg00000022694	NA
EPlOsAg00000022701	NA
EPlOsAg00000022713	NA
EPlOsAg00000022747	NA
EPlOsAg00000022807	NA
EPlOsAg00000022813	NA
EPlOsAg00000022837	NA
EPlOsAg00000022838	NA
EPlOsAg00000022873	NA
EPlOsAg00000022894	NA
EPlOsAg00000022988	NA
EPlOsAg00000023005	NA
EPlOsAg00000023158	NA
EPlOsAg00000023172	NA
EPlOsAg00000023192	NA
EPlOsAg00000023214	NA
EPlOsAg00000023231	NA
EPlOsAg00000023247	NA
EPlOsAg00000023268	NA
EPlOsAg00000023280	NA
EPlOsAg00000023306	NA
EPlOsAg00000023363	NA
EPlOsAg00000023392	NA
EPlOsAg00000023394	NA
EPlOsAg00000023403	NA
EPlOsAg00000023529	NA
EPlOsAg00000023627	NA
EPlOsAg00000023669	NA
EPlOsAg00000023704	NA
EPlOsAg00000023707	NA
EPlOsAg00000023738	NA
EPlOsAg00000023739	NA
EPlOsAg00000023740	NA
EPlOsAg00000023741	NA
EPlOsAg00000023742	NA
EPlOsAg00000023746	NA
EPlOsAg00000023747	NA
EPlOsAg00000023750	NA
EPlOsAg00000023751	NA
EPlOsAg00000023752	NA
EPlOsAg00000023753	NA
EPlOsAg00000023754	NA
EPlOsAg00000023756	NA
EPlOsAg00000023757	NA
EPlOsAg00000023758	NA
EPlOsAg00000023814	NA
EPlOsAg00000023815	NA
EPlOsAg00000023816	NA
EPlOsAg00000023832	NA
EPlOsAg00000023847	NA
EPlOsAg00000023915	NA
EPlOsAg00000023916	NA
EPlOsAg00000023931	NA
EPlOsAg00000023976	NA
EPlOsAg00000023985	NA
EPlOsAg00000023993	NA
EPlOsAg00000024030	NA
EPlOsAg00000024034	NA
EPlOsAg00000024068	NA
EPlOsAg00000024120	NA
EPlOsAg00000024151	NA
EPlOsAg00000024196	NA
EPlOsAg00000024200	NA
EPlOsAg00000024206	NA
EPlOsAg00000024322	NA
EPlOsAg00000024337	NA
EPlOsAg00000024356	NA
EPlOsAg00000024379	NA
EPlOsAg00000024386	NA
EPlOsAg00000024474	NA
EPlOsAg00000024491	NA
EPlOsAg00000024520	NA
EPlOsAg00000024563	NA
EPlOsAg00000024578	NA
EPlOsAg00000024623	NA
EPlOsAg00000024626	NA
EPlOsAg00000024638	NA
EPlOsAg00000024648	NA
EPlOsAg00000024675	NA
EPlOsAg00000024733	NA
EPlOsAg00000024837	NA
EPlOsAg00000024874	NA
EPlOsAg00000024879	NA
EPlOsAg00000025054	NA
EPlOsAg00000025149	NA
EPlOsAg00000025164	NA
EPlOsAg00000025314	NA
EPlOsAg00000025317	NA
EPlOsAg00000025434	NA
EPlOsAg00000025446	NA
EPlOsAg00000025461	NA
EPlOsAg00000025540	NA
EPlOsAg00000025671	NA
EPlOsAg00000026003	NA
EPlOsAg00000026100	NA
EPlOsAg00000026138	NA
EPlOsAg00000026258	NA
EPlOsAg00000026650	NA
EPlOsAg00000026652	NA
EPlOsAg00000026779	NA
EPlOsAg00000026915	NA
EPlOsAg00000026983	NA
EPlOsAg00000027130	NA
EPlOsAg00000027189	NA
EPlOsAg00000027216	NA
EPlOsAg00000027281	NA
EPlOsAg00000027445	NA
EPlOsAg00000027460	NA
EPlOsAg00000027651	NA
EPlOsAg00000027744	NA
EPlOsAg00000027843	NA
EPlOsAg00000027869	NA
EPlOsAg00000028070	NA
EPlOsAg00000028114	NA
EPlOsAg00000028184	NA
EPlOsAg00000028215	NA
EPlOsAg00000028254	NA
EPlOsAg00000028271	NA
EPlOsAg00000028349	NA
EPlOsAg00000028645	NA
EPlOsAg00000028665	NA
EPlOsAg00000028767	NA
EPlOsAg00000028846	NA
EPlOsAg00000028849	NA
EPlOsAg00000028859	NA
EPlOsAg00000029038	NA
EPlOsAg00000029086	NA
EPlOsAg00000029167	NA
EPlOsAg00000029287	NA
EPlOsAg00000029524	NA
EPlOsAg00000029649	NA
EPlOsAg00000029733	NA
EPlOsAg00000029844	NA
EPlOsAg00000029872	NA
EPlOsAg00000029939	NA
EPlOsAg00000030007	NA
EPlOsAg00000030280	NA
EPlOsAg00000030288	NA
EPlOsAg00000030410	NA
EPlOsAg00000030511	NA
EPlOsAg00000030622	NA
EPlOsAg00000030855	NA
EPlOsAg00000030923	NA
EPlOsAg00000031010	NA
EPlOsAg00000031115	NA
EPlOsAg00000031156	NA
EPlOsAg00000031183	NA
EPlOsAg00000031212	NA
EPlOsAg00000031220	NA
EPlOsAg00000031281	NA
EPlOsAg00000031283	NA
EPlOsAg00000031420	NA
EPlOsAg00000031428	NA
EPlOsAg00000031435	NA
EPlOsAg00000031455	NA
EPlOsAg00000031508	NA
EPlOsAg00000031584	NA
EPlOsAg00000031627	NA
EPlOsAg00000031751	NA
EPlOsAg00000031844	NA
EPlOsAg00000031955	NA
EPlOsAg00000032079	NA
EPlOsAg00000032151	NA
EPlOsAg00000032177	NA
EPlOsAg00000032190	NA
EPlOsAg00000032327	NA
EPlOsAg00000032359	NA
EPlOsAg00000032383	NA
EPlOsAg00000032419	NA
EPlOsAg00000032461	NA
EPlOsAg00000032510	NA
EPlOsAg00000032621	NA
EPlOsAg00000032647	NA
EPlOsAg00000032802	NA
EPlOsAg00000032818	NA
EPlOsAg00000032837	NA
EPlOsAg00000032844	NA
EPlOsAg00000033118	NA
EPlOsAg00000033251	NA
EPlOsAg00000033317	NA
EPlOsAg00000033380	NA
EPlOsAg00000033385	NA
EPlOsAg00000033501	NA
EPlOsAg00000033502	NA
EPlOsAg00000033774	NA
EPlOsAg00000033831	NA
EPlOsAg00000033998	NA
EPlOsAg00000034087	NA
EPlOsAg00000034210	NA
EPlOsAg00000034219	NA
EPlOsAg00000034332	NA
EPlOsAg00000034335	NA
EPlOsAg00000034343	NA
EPlOsAg00000034368	NA
EPlOsAg00000034386	NA
EPlOsAg00000034399	NA
EPlOsAg00000034404	NA
EPlOsAg00000034420	NA
EPlOsAg00000034573	NA
EPlOsAg00000034586	NA
EPlOsAg00000034609	NA
EPlOsAg00000034661	NA
EPlOsAg00000034687	NA
EPlOsAg00000034747	NA
EPlOsAg00000034812	NA
EPlOsAg00000034822	NA
EPlOsAg00000034843	NA
EPlOsAg00000034861	NA
EPlOsAg00000034927	NA
EPlOsAg00000034955	NA
EPlOsAg00000034986	NA
EPlOsAg00000034987	NA
EPlOsAg00000035029	NA
EPlOsAg00000035054	NA
EPlOsAg00000035423	NA
EPlOsAg00000035510	NA
EPlOsAg00000035556	NA
EPlOsAg00000035580	NA
EPlOsAg00000035586	NA
EPlOsAg00000035621	NA
EPlOsAg00000035706	NA
EPlOsAg00000035724	NA
EPlOsAg00000035732	NA
EPlOsAg00000035843	NA
EPlOsAg00000035902	NA
EPlOsAg00000035926	NA
EPlOsAg00000036005	NA
EPlOsAg00000036018	NA
EPlOsAg00000036178	NA
EPlOsAg00000036341	NA
EPlOsAg00000036399	NA
EPlOsAg00000036495	NA
EPlOsAg00000036596	NA
EPlOsAg00000036664	NA
EPlOsAg00000036693	NA
EPlOsAg00000037056	NA
EPlOsAg00000037140	NA
EPlOsAg00000037174	NA
EPlOsAg00000037226	NA
EPlOsAg00000037335	NA
EPlOsAg00000037367	NA
EPlOsAg00000037613	NA
EPlOsAg00000037619	NA
EPlOsAg00000037687	NA
EPlOsAg00000037709	NA
EPlOsAg00000037809	NA
EPlOsAg00000037865	NA
EPlOsAg00000037887	NA
EPlOsAg00000037893	NA
EPlOsAg00000037903	NA
EPlOsAg00000038059	NA
EPlOsAg00000038114	NA
EPlOsAg00000038148	NA
EPlOsAg00000038210	NA
EPlOsAg00000038218	NA
EPlOsAg00000038292	NA
EPlOsAg00000038321	NA
EPlOsAg00000038365	NA
EPlOsAg00000038376	NA
EPlOsAg00000038409	NA
EPlOsAg00000038638	NA
EPlOsAg00000038646	NA
EPlOsAg00000038754	NA
EPlOsAg00000038831	NA
EPlOsAg00000038843	NA
EPlOsAg00000038880	NA
EPlOsAg00000038945	NA
EPlOsAg00000038976	NA
EPlOsAg00000039059	NA
EPlOsAg00000039130	NA
EPlOsAg00000039316	NA
EPlOsAg00000039398	NA
EPlOsAg00000039411	NA
EPlOsAg00000039422	NA
EPlOsAg00000039454	NA
EPlOsAg00000039466	NA
EPlOsAg00000039476	NA
EPlOsAg00000039489	NA
EPlOsAg00000039696	NA
EPlOsAg00000040001	NA
EPlOsAg00000040040	NA
EPlOsAg00000040107	NA
EPlOsAg00000040201	NA
EPlOsAg00000040295	NA
EPlOsAg00000040404	NA
EPlOsAg00000040459	NA
EPlOsAg00000040553	NA
EPlOsAg00000040620	NA
EPlOsAg00000040645	NA
EPlOsAg00000040662	NA
EPlOsAg00000040737	NA
EPlOsAg00000040761	NA
EPlOsAg00000040884	NA
EPlOsAg00000041113	NA
EPlOsAg00000041249	NA
EPlOsAg00000041261	NA
EPlOsAg00000041426	NA
EPlOsAg00000041668	NA
EPlOsAg00000041705	NA
EPlOsAg00000041814	NA
EPlOsAg00000042027	NA
EPlOsAg00000042089	NA
EPlOsAg00000042196	NA
EPlOsAg00000042454	NA
EPlOsAg00000042462	NA
EPlOsAg00000042480	NA
EPlOsAg00000042569	NA
EPlOsAg00000042699	NA
EPlOsAg00000042703	NA
EPlOsAg00000042707	NA
EPlOsAg00000042918	NA
EPlOsAg00000042942	NA
EPlOsAg00000043037	NA
EPlOsAg00000043050	NA
EPlOsAg00000043069	NA
EPlOsAg00000043091	NA
EPlOsAg00000043097	NA
EPlOsAg00000043114	NA
EPlOsAg00000043204	NA
EPlOsAg00000043508	NA
EPlOsAg00000043521	NA
EPlOsAg00000043568	NA
EPlOsAg00000043611	NA
EPlOsAg00000043619	NA
EPlOsAg00000043742	NA
EPlOsAg00000043786	NA
EPlOsAg00000043873	NA
EPlOsAg00000044077	NA
EPlOsAg00000044112	NA
EPlOsAg00000044143	NA
EPlOsAg00000044158	NA
EPlOsAg00000044281	NA
EPlOsAg00000044440	NA
EPlOsAg00000044472	NA
EPlOsAg00000044789	NA
EPlOsAg00000045065	NA
EPlOsAg00000045110	NA
EPlOsAg00000045176	NA
EPlOsAg00000045188	NA
EPlOsAg00000045221	NA
EPlOsAg00000045243	NA
EPlOsAg00000045265	NA
EPlOsAg00000045287	NA
EPlOsAg00000045354	NA
EPlOsAg00000045387	NA
EPlOsAg00000045447	NA
EPlOsAg00000045454	NA
EPlOsAg00000045465	NA
EPlOsAg00000045476	NA
EPlOsAg00000045543	NA
EPlOsAg00000045565	NA
EPlOsAg00000045576	NA
EPlOsAg00000045581	NA
EPlOsAg00000045598	NA
EPlOsAg00000045609	NA
EPlOsAg00000045626	NA
EPlOsAg00000045643	NA
EPlOsAg00000045665	NA
EPlOsAg00000045676	NA
EPlOsAg00000045679	NA
EPlOsAg00000045687	NA
EPlOsAg00000045698	NA
EPlOsAg00000045709	NA
EPlOsAg00000045720	NA
EPlOsAg00000045765	NA
EPlOsAg00000045787	NA
EPlOsAg00000045809	NA
EPlOsAg00000045820	NA
EPlOsAg00000045831	NA
EPlOsAg00000045842	NA
EPlOsAg00000045854	NA
EPlOsAg00000045876	NA
EPlOsAg00000045887	NA
EPlOsAg00000045898	NA
EPlOsAg00000045942	NA
EPlOsAg00000045953	NA
EPlOsAg00000045966	NA
EPlOsAg00000045977	NA
EPlOsAg00000046016	NA
EPlOsAg00000046023	NA
EPlOsAg00000046032	NA
EPlOsAg00000046044	NA
EPlOsAg00000046046	NA
EPlOsAg00000046052	NA
EPlOsAg00000046054	NA
EPlOsAg00000046057	NA
EPlOsAg00000046077	NA
EPlOsAg00000046099	NA
EPlOsAg00000046110	NA
EPlOsAg00000046165	NA
EPlOsAg00000046176	NA
EPlOsAg00000046210	NA
EPlOsAg00000046213	NA
EPlOsAg00000046254	NA
EPlOsAg00000046321	NA
EPlOsAg00000046332	NA
EPlOsAg00000046336	NA
EPlOsAg00000046343	NA
EPlOsAg00000046354	NA
EPlOsAg00000046365	NA
EPlOsAg00000046372	NA
EPlOsAg00000046387	NA
EPlOsAg00000046410	NA
EPlOsAg00000046421	NA
EPlOsAg00000046432	NA
EPlOsAg00000046454	NA
EPlOsAg00000046465	NA
EPlOsAg00000046487	NA
EPlOsAg00000046498	NA
EPlOsAg00000046665	NA
EPlOsAg00000046676	NA
EPlOsAg00000046687	NA
EPlOsAg00000046698	NA
EPlOsAg00000046731	NA
EPlOsAg00000046743	NA
EPlOsAg00000046754	NA
EPlOsAg00000046765	NA
EPlOsAg00000046798	NA
EPlOsAg00000046809	NA
EPlOsAg00000046814	NA
EPlOsAg00000046842	NA
EPlOsAg00000046965	NA
EPlOsAg00000046976	NA
EPlOsAg00000046981	NA
EPlOsAg00000046987	NA
EPlOsAg00000046998	NA
EPlOsAg00000047009	NA
EPlOsAg00000047010	NA
EPlOsAg00000047076	NA
EPlOsAg00000047172	NA
EPlOsAg00000047195	NA
EPlOsAg00000047202	NA
EPlOsAg00000047239	NA
EPlOsAg00000047244	NA
EPlOsAg00000047361	NA
EPlOsAg00000047462	NA
EPlOsAg00000047609	NA
EPlOsAg00000047686	NA
EPlOsAg00000047690	NA
EPlOsAg00000047803	NA
EPlOsAg00000047829	NA
EPlOsAg00000047842	NA
EPlOsAg00000048068	NA
EPlOsAg00000048134	NA
EPlOsAg00000048533	NA
EPlOsAg00000048557	NA
EPlOsAg00000048690	NA
EPlOsAg00000048841	NA
EPlOsAg00000048845	NA
EPlOsAg00000048846	NA
EPlOsAg00000048905	NA
EPlOsAg00000048994	NA
EPlOsAg00000049003	NA
EPlOsAg00000049005	NA
EPlOsAg00000049007	NA
EPlOsAg00000049092	NA
EPlOsAg00000049209	NA
EPlOsAg00000049234	NA
EPlOsAg00000049264	NA
EPlOsAg00000049321	NA
EPlOsAg00000049343	NA
EPlOsAg00000049354	NA
EPlOsAg00000049434	NA
EPlOsAg00000049458	NA
EPlOsAg00000049465	NA
EPlOsAg00000049468	NA
EPlOsAg00000049473	NA
EPlOsAg00000049482	NA
EPlOsAg00000049485	NA
EPlOsAg00000049498	NA
EPlOsAg00000049535	NA
EPlOsAg00000049541	NA
EPlOsAg00000049543	NA
EPlOsAg00000049565	NA
EPlOsAg00000049573	NA
EPlOsAg00000049578	NA
EPlOsAg00000049606	NA
EPlOsAg00000049608	NA
EPlOsAg00000049636	NA
EPlOsAg00000049654	NA
EPlOsAg00000049668	NA
EPlOsAg00000049687	NA
EPlOsAg00000049701	NA
EPlOsAg00000049908	NA
EPlOsAg00000049946	NA
EPlOsAg00000049962	NA
EPlOsAg00000050096	NA
EPlOsAg00000050109	NA
EPlOsAg00000050136	NA
EPlOsAg00000050172	NA
EPlOsAg00000050249	NA
EPlOsAg00000050286	NA
EPlOsAg00000050325	NA
EPlOsAg00000050364	NA
EPlOsAg00000050386	NA
EPlOsAg00000050397	NA
EPlOsAg00000050409	NA
EPlOsAg00000050410	NA
EPlOsAg00000050432	NA
EPlOsAg00000050443	NA
EPlOsAg00000050449	NA
EPlOsAg00000050454	NA
EPlOsAg00000050465	NA
EPlOsAg00000050482	NA
EPlOsAg00000050676	NA
EPlOsAg00000050709	NA
EPlOsAg00000050793	NA
EPlOsAg00000050814	NA
EPlOsAg00000050815	NA
EPlOsAg00000050992	NA
EPlOsAg00000050994	NA
EPlOsAg00000051033	NA
EPlOsAg00000051035	NA
EPlOsAg00000051036	NA
EPlOsAg00000051052	NA
EPlOsAg00000051075	NA
EPlOsAg00000051078	NA
EPlOsAg00000051080	NA
EPlOsAg00000051081	NA
EPlOsAg00000051089	NA
EPlOsAg00000051128	NA
EPlOsAg00000051129	NA
EPlOsAg00000051160	NA
EPlOsAg00000051163	NA
EPlOsAg00000051166	NA
EPlOsAg00000051171	NA
EPlOsAg00000051178	NA
EPlOsAg00000051180	NA
EPlOsAg00000051222	NA
EPlOsAg00000051223	NA
EPlOsAg00000051227	NA
EPlOsAg00000051230	NA
EPlOsAg00000051233	NA
EPlOsAg00000051236	NA
EPlOsAg00000051237	NA
EPlOsAg00000051298	NA
EPlOsAg00000051309	NA
EPlOsAg00000051353	NA
EPlOsAg00000051377	NA
EPlOsAg00000051389	NA
EPlOsAg00000051405	NA
EPlOsAg00000051435	NA
EPlOsAg00000051466	NA
EPlOsAg00000051531	NA
EPlOsAg00000051543	NA
EPlOsAg00000051551	NA
EPlOsAg00000051673	NA
EPlOsAg00000052116	NA
EPlOsAg00000052126	NA
EPlOsAg00000052129	NA
EPlOsAg00000052134	NA
EPlOsAg00000052274	NA
EPlOsAg00000052337	NA
EPlOsAg00000052524	NA
EPlOsAg00000052544	NA
EPlOsAg00000052575	NA
EPlOsAg00000052658	NA
EPlOsAg00000052670	NA
EPlOsAg00000052676	NA
EPlOsAg00000052681	NA
EPlOsAg00000052702	NA
EPlOsAg00000052775	NA
EPlOsAg00000052808	NA
EPlOsAg00000052939	NA
EPlOsAg00000053084	NA
EPlOsAg00000053089	NA
EPlOsAg00000053115	NA
EPlOsAg00000053143	NA
EPlOsAg00000053168	NA
EPlOsAg00000053183	NA
EPlOsAg00000053220	NA
EPlOsAg00000053254	NA
EPlOsAg00000053299	NA
EPlOsAg00000053304	NA
Os01g0100100	LOC_Os01g01010.2
Os01g0100100	LOC_Os01g01010.1
Os01g0100100	LOC_Os01g01010
Os01g0100400	LOC_Os01g01030
Os01g0100400	LOC_Os01g01030.1
Os01g0100500	LOC_Os01g01040.1
Os01g0100500	LOC_Os01g01040.2
Os01g0100500	LOC_Os01g01040.4
Os01g0100500	LOC_Os01g01040
Os01g0100500	LOC_Os01g01040.3
Os01g0100700	LOC_Os01g01060
Os01g0100700	LOC_Os01g01060.1
Os01g0100800	LOC_Os01g01070.3
Os01g0100800	LOC_Os01g01070.1
Os01g0100800	LOC_Os01g01070.2
Os01g0100800	LOC_Os01g01070
Os01g0101150	LOC_Os01g01115
Os01g0101150	LOC_Os01g01115.1
Os01g0101175	None
Os01g0101200	LOC_Os01g01120
Os01g0101200	LOC_Os01g01120.1
Os01g0101300	LOC_Os01g01130
Os01g0101300	LOC_Os01g01130.1
Os01g0101600	LOC_Os01g01150.1
Os01g0101600	LOC_Os01g01150.3
Os01g0101600	LOC_Os01g01150
Os01g0101600	LOC_Os01g01150.2
Os01g0101700	LOC_Os01g01160
Os01g0101700	LOC_Os01g01160.1
Os01g0101800	LOC_Os01g01170
Os01g0101800	LOC_Os01g01170.1
Os01g0102300	LOC_Os01g01280
Os01g0102300	LOC_Os01g01280.1
Os01g0102400	LOC_Os01g01290.1
Os01g0102400	LOC_Os01g01290
Os01g0102500	LOC_Os01g01295
Os01g0102500	LOC_Os01g01295.1
Os01g0102700	LOC_Os01g01307.2
Os01g0102700	LOC_Os01g01307.1
Os01g0102700	LOC_Os01g01307
Os01g0102800	LOC_Os01g01312
Os01g0102800	LOC_Os01g01312.1
Os01g0102850	None
Os01g0102900	LOC_Os01g01340.1
Os01g0102900	LOC_Os01g01340.2
Os01g0102900	LOC_Os01g01340
Os01g0103000	LOC_Os01g01350
Os01g0103000	LOC_Os01g01350.2
Os01g0103000	LOC_Os01g01350.1
Os01g0103050	None
Os01g0103100	LOC_Os01g01360.1
Os01g0103100	LOC_Os01g01360
Os01g0103400	None
Os01g0103600	LOC_Os01g01369.1
Os01g0103600	LOC_Os01g01369
Os01g0103700	LOC_Os01g01380
Os01g0103700	LOC_Os01g01380.1
Os01g0103800	LOC_Os01g01390.1
Os01g0103800	LOC_Os01g01390.2
Os01g0103800	LOC_Os01g01390.5
Os01g0103800	LOC_Os01g01390.4
Os01g0103800	LOC_Os01g01390.3
Os01g0103800	LOC_Os01g01390
Os01g0103900	LOC_Os01g01400
Os01g0103900	LOC_Os01g01400.1
Os01g0104100	LOC_Os01g01420.1
Os01g0104100	LOC_Os01g01420.3
Os01g0104100	LOC_Os01g01420
Os01g0104100	LOC_Os01g01420.2
Os01g0104350	None
Os01g0104400	LOC_Os01g01450
Os01g0104400	LOC_Os01g01450.1
Os01g0104400	LOC_Os01g01450.2
Os01g0104500	LOC_Os01g01470
Os01g0104500	LOC_Os01g01470.1
Os01g0104600	LOC_Os01g01484.2
Os01g0104600	LOC_Os01g01484.1
Os01g0104600	LOC_Os01g01484.4
Os01g0104600	LOC_Os01g01484
Os01g0104600	LOC_Os01g01484.5
Os01g0104800	LOC_Os01g01510.1
Os01g0104800	LOC_Os01g01510.2
Os01g0104800	LOC_Os01g01510
Os01g0104900	LOC_Os01g01520
Os01g0104900	LOC_Os01g01520.1
Os01g0105300	LOC_Os01g01560
Os01g0105300	LOC_Os01g01560.1
Os01g0105400	LOC_Os01g01570
Os01g0105400	LOC_Os01g01570.1
Os01g0105700	LOC_Os01g01600
Os01g0105700	LOC_Os01g01600.1
Os01g0105800	LOC_Os01g01610.1
Os01g0105800	LOC_Os01g01610
Os01g0105900	LOC_Os01g01620.1
Os01g0105900	LOC_Os01g01620
Os01g0106200	LOC_Os01g01640
Os01g0106200	LOC_Os01g01640.1
Os01g0106300	LOC_Os01g01650
Os01g0106300	LOC_Os01g01650.1
Os01g0106400	LOC_Os01g01660.1
Os01g0106400	LOC_Os01g01660
Os01g0106500	LOC_Os01g01670.2
Os01g0106500	LOC_Os01g01670.1
Os01g0106500	LOC_Os01g01670
Os01g0106600	LOC_Os01g01680
Os01g0106600	LOC_Os01g01680.1
Os01g0106700	LOC_Os01g01689
Os01g0106700	LOC_Os01g01689.3
Os01g0106700	LOC_Os01g01689.1
Os01g0106800	LOC_Os01g01700.1
Os01g0106800	LOC_Os01g01700
Os01g0106900	LOC_Os01g01710.2
Os01g0106900	LOC_Os01g01710.1
Os01g0106900	LOC_Os01g01710
Os01g0107000	LOC_Os01g01720.2
Os01g0107000	LOC_Os01g01720
Os01g0107000	LOC_Os01g01720.1
Os01g0107700	LOC_Os01g01780
Os01g0107700	LOC_Os01g01780.1
Os01g0107750	None
Os01g0107900	LOC_Os01g01790.2
Os01g0107900	LOC_Os01g01790
Os01g0107900	LOC_Os01g01790.1
Os01g0108000	LOC_Os01g01800.2
Os01g0108000	LOC_Os01g01800
Os01g0108000	LOC_Os01g01800.1
Os01g0108200	LOC_Os01g01830.1
Os01g0108200	LOC_Os01g01830
Os01g0108400	LOC_Os01g01840
Os01g0108400	LOC_Os01g01840.1
Os01g0108600	LOC_Os01g01870
Os01g0108600	LOC_Os01g01870.1
Os01g0108800	LOC_Os01g01890.1
Os01g0108800	LOC_Os01g01890
Os01g0109000	None
Os01g0109201	None
Os01g0109300	LOC_Os01g01920
Os01g0109300	LOC_Os01g01920.1
Os01g0109300	LOC_Os01g01920.2
Os01g0109432	None
Os01g0109500	LOC_Os01g01940
Os01g0109500	LOC_Os01g01940.1
Os01g0109700	LOC_Os01g01960.1
Os01g0109700	LOC_Os01g01960
Os01g0110100	LOC_Os01g02000.1
Os01g0110100	LOC_Os01g02000
Os01g0110200	LOC_Os01g02010
Os01g0110200	LOC_Os01g02010.1
Os01g0110400	LOC_Os01g02020.3
Os01g0110400	LOC_Os01g02020
Os01g0110400	LOC_Os01g02020.1
Os01g0110500	LOC_Os01g02040.2
Os01g0110500	LOC_Os01g02040
Os01g0110500	LOC_Os01g02040.1
Os01g0110600	None
Os01g0110700	LOC_Os01g02050.1
Os01g0110700	LOC_Os01g02050
Os01g0110800	LOC_Os01g02060.2
Os01g0110800	LOC_Os01g02060
Os01g0110800	LOC_Os01g02060.1
Os01g0111100	LOC_Os01g02080.1
Os01g0111100	LOC_Os01g02080
Os01g0111300	None
Os01g0111400	LOC_Os01g02100.2
Os01g0111400	LOC_Os01g02100.3
Os01g0111400	LOC_Os01g02100.4
Os01g0111400	LOC_Os01g02100.1
Os01g0111400	LOC_Os01g02100
Os01g0111600	LOC_Os01g02120
Os01g0111600	LOC_Os01g02120.1
Os01g0111700	LOC_Os01g02130.1
Os01g0111700	LOC_Os01g02130
Os01g0111800	LOC_Os01g02139.1
Os01g0111800	LOC_Os01g02139
Os01g0111900	LOC_Os01g02150
Os01g0111900	LOC_Os01g02150.1
Os01g0112000	LOC_Os01g02160
Os01g0112000	LOC_Os01g02160.1
Os01g0112050	LOC_Os01g02170
Os01g0112050	LOC_Os01g02170.2
Os01g0112100	LOC_Os01g02170.1
Os01g0112100	LOC_Os01g02170.2
Os01g0112100	LOC_Os01g02170
Os01g0112300	LOC_Os01g02180.2
Os01g0112300	LOC_Os01g02180
Os01g0112300	LOC_Os01g02180.1
Os01g0112500	LOC_Os01g02200
Os01g0112500	LOC_Os01g02200.1
Os01g0112600	None
Os01g0112800	LOC_Os01g02250.1
Os01g0112800	LOC_Os01g02250
Os01g0113000	LOC_Os01g02270
Os01g0113000	LOC_Os01g02270.1
Os01g0113150	LOC_Os01g02280
Os01g0113150	LOC_Os01g02280.1
Os01g0113200	LOC_Os01g02290.2
Os01g0113200	LOC_Os01g02290.1
Os01g0113200	LOC_Os01g02290
Os01g0113300	LOC_Os01g02300.1
Os01g0113300	LOC_Os01g02300
Os01g0113325	None
Os01g0113350	LOC_Os01g02310.1
Os01g0113350	LOC_Os01g02310
Os01g0113400	LOC_Os01g02320.1
Os01g0113400	LOC_Os01g02320
Os01g0113450	None
Os01g0113500	None
Os01g0113600	LOC_Os01g02334.1
Os01g0113600	LOC_Os01g02334
Os01g0113650	None
Os01g0113700	LOC_Os01g02350.1
Os01g0113700	LOC_Os01g02350
Os01g0113800	LOC_Os01g02360.1
Os01g0113800	LOC_Os01g02360
Os01g0114100	LOC_Os01g02390.2
Os01g0114100	LOC_Os01g02390
Os01g0114100	LOC_Os01g02390.1
Os01g0114150	None
Os01g0114200	None
Os01g0114300	LOC_Os01g02400.1
Os01g0114300	LOC_Os01g02400.3
Os01g0114300	LOC_Os01g02400.2
Os01g0114300	LOC_Os01g02400
Os01g0114550	None
Os01g0114600	LOC_Os01g02430.1
Os01g0114600	LOC_Os01g02430
Os01g0114650	None
Os01g0114700	LOC_Os01g02440
Os01g0114700	LOC_Os01g02440.1
Os01g0114800	LOC_Os01g02450.1
Os01g0114800	LOC_Os01g02450
Os01g0114900	LOC_Os01g02460.1
Os01g0114900	LOC_Os01g02460
Os01g0115100	LOC_Os01g02490.1
Os01g0115100	LOC_Os01g02490
Os01g0115100	LOC_Os01g02490.2
Os01g0115300	None
Os01g0115600	LOC_Os01g02560.1
Os01g0115600	LOC_Os01g02560
Os01g0115700	LOC_Os01g02570
Os01g0115700	LOC_Os01g02570.1
Os01g0115725	None
Os01g0115750	LOC_Os01g02580.1
Os01g0115750	LOC_Os01g02580
Os01g0115752	None
Os01g0115800	LOC_Os01g02590.1
Os01g0115800	LOC_Os01g02590
Os01g0115900	LOC_Os01g02600.1
Os01g0115900	LOC_Os01g02600
Os01g0116000	LOC_Os01g02610.1
Os01g0116000	LOC_Os01g02610
Os01g0116400	LOC_Os01g02700.1
Os01g0116400	LOC_Os01g02700
Os01g0116600	LOC_Os01g02720.2
Os01g0116600	LOC_Os01g02720
Os01g0116600	LOC_Os01g02720.1
Os01g0116650	None
Os01g0116800	LOC_Os01g02730
Os01g0116800	LOC_Os01g02730.1
Os01g0116900	LOC_Os01g02710.1
Os01g0116900	LOC_Os01g02710
Os01g0116900	LOC_Os01g02750.1
Os01g0116901	None
Os01g0117000	LOC_Os01g02760
Os01g0117000	LOC_Os01g02760.1
Os01g0117025	None
Os01g0117050	None
Os01g0117100	LOC_Os01g02770.1
Os01g0117100	LOC_Os01g02770
Os01g0117400	LOC_Os01g02800
Os01g0117400	LOC_Os01g02800.1
Os01g0117600	LOC_Os01g02830.1
Os01g0117600	LOC_Os01g02830
Os01g0117700	LOC_Os01g02840
Os01g0117700	LOC_Os01g02840.1
Os01g0117900	LOC_Os01g02870
Os01g0117900	LOC_Os01g02870.1
Os01g0118000	LOC_Os01g02880
Os01g0118000	LOC_Os01g02880.1
Os01g0118066	None
Os01g0118100	LOC_Os01g02884.1
Os01g0118100	LOC_Os01g02884
Os01g0118300	LOC_Os01g02890
Os01g0118300	LOC_Os01g02890.1
Os01g0118350	None
Os01g0118400	LOC_Os01g02900
Os01g0118400	LOC_Os01g02900.1
Os01g0118400	LOC_Os01g02900.2
Os01g0118700	LOC_Os01g02920.1
Os01g0118700	LOC_Os01g02920
Os01g0119000	LOC_Os01g02930
Os01g0119000	LOC_Os01g02930.1
Os01g0119050	LOC_Os01g02940.3
Os01g0119050	LOC_Os01g02940.6
Os01g0119050	LOC_Os01g02940.2
Os01g0119050	LOC_Os01g02940
Os01g0119050	LOC_Os01g02940.1
Os01g0119050	LOC_Os01g02940.4
Os01g0119100	LOC_Os01g02940.1
Os01g0119100	LOC_Os01g02940
Os01g0119100	LOC_Os01g02940.4
Os01g0119100	LOC_Os01g02940.6
Os01g0119100	LOC_Os01g02940.3
Os01g0119100	LOC_Os01g02940.2
Os01g0119500	LOC_Os01g02960
Os01g0119500	LOC_Os01g02960.1
Os01g0119800	None
Os01g0120300	LOC_Os01g03020
Os01g0120300	LOC_Os01g03020.1
Os01g0120300	LOC_Os01g03020.2
Os01g0120400	LOC_Os01g03030
Os01g0120400	LOC_Os01g03030.2
Os01g0120400	LOC_Os01g03030.1
Os01g0120500	LOC_Os01g03040.1
Os01g0120500	LOC_Os01g03040
Os01g0120600	LOC_Os01g03050.1
Os01g0120600	LOC_Os01g03050
Os01g0120700	LOC_Os01g03060.3
Os01g0120700	LOC_Os01g03060.2
Os01g0120700	LOC_Os01g03060
Os01g0120700	LOC_Os01g03060.1
Os01g0120800	LOC_Os01g03070
Os01g0120800	LOC_Os01g03070.1
Os01g0120800	LOC_Os01g03070.2
Os01g0121000	LOC_Os01g03080
Os01g0121000	LOC_Os01g03080.1
Os01g0121100	LOC_Os01g03090.2
Os01g0121100	LOC_Os01g03090
Os01g0121100	LOC_Os01g03090.1
Os01g0121200	LOC_Os01g03100
Os01g0121200	LOC_Os01g03100.1
Os01g0121200	LOC_Os01g03100.2
Os01g0121300	LOC_Os01g03110.1
Os01g0121300	LOC_Os01g03110
Os01g0121500	LOC_Os01g03130
Os01g0121500	LOC_Os01g03130.1
Os01g0121600	LOC_Os01g03144
Os01g0121600	LOC_Os01g03144.1
Os01g0121700	LOC_Os01g03144
Os01g0121700	LOC_Os01g03144.1
Os01g0121800	LOC_Os01g03160.2
Os01g0121800	LOC_Os01g03160
Os01g0121800	LOC_Os01g03160.1
Os01g0123500	LOC_Os01g03270.1
Os01g0123500	LOC_Os01g03270
Os01g0123900	LOC_Os01g03310
Os01g0123900	LOC_Os01g03310.1
Os01g0124000	LOC_Os01g03320
Os01g0124000	LOC_Os01g03320.1
Os01g0124100	LOC_Os01g03330.1
Os01g0124100	LOC_Os01g03330
Os01g0124200	LOC_Os01g03340
Os01g0124200	LOC_Os01g03340.1
Os01g0124401	LOC_Os01g03360.1
Os01g0124401	LOC_Os01g03360
Os01g0124550	None
Os01g0124650	LOC_Os01g03390.1
Os01g0124650	LOC_Os01g03390
Os01g0124700	None
Os01g0124900	LOC_Os01g03400
Os01g0124900	LOC_Os01g03400.1
Os01g0124900	LOC_Os01g03410.1
Os01g0125550	LOC_Os01g03480
Os01g0125550	LOC_Os01g03480.1
Os01g0125600	LOC_Os01g03490.1
Os01g0125600	LOC_Os01g03490
Os01g0125700	LOC_Os01g03500.1
Os01g0125700	LOC_Os01g03500
Os01g0125800	LOC_Os01g03510
Os01g0125800	LOC_Os01g03510.1
Os01g0125900	LOC_Os01g03520
Os01g0125900	LOC_Os01g03520.1
Os01g0126100	LOC_Os01g03530.1
Os01g0126100	LOC_Os01g03530
Os01g0126100	LOC_Os01g03530.2
Os01g0126200	LOC_Os01g03549.1
Os01g0126200	LOC_Os01g03549
Os01g0126401	None
Os01g0126600	LOC_Os01g03570.1
Os01g0126600	LOC_Os01g03570
Os01g0126900	LOC_Os01g03620
Os01g0126900	LOC_Os01g03620.1
Os01g0127000	LOC_Os01g03630.1
Os01g0127000	LOC_Os01g03630
Os01g0127200	LOC_Os01g03640
Os01g0127200	LOC_Os01g03640.1
Os01g0127300	LOC_Os01g03650.1
Os01g0127300	LOC_Os01g03650
Os01g0127400	LOC_Os01g03660.2
Os01g0127400	LOC_Os01g03660
Os01g0127400	LOC_Os01g03660.3
Os01g0127600	LOC_Os01g03680
Os01g0127600	LOC_Os01g03680.1
Os01g0127700	LOC_Os01g03690
Os01g0127700	LOC_Os01g03690.1
Os01g0127900	LOC_Os01g03710
Os01g0127900	LOC_Os01g03710.1
Os01g0128000	LOC_Os01g03720
Os01g0128000	LOC_Os01g03720.1
Os01g0128100	LOC_Os01g03740
Os01g0128100	LOC_Os01g03740.1
Os01g0128200	LOC_Os01g03730
Os01g0128200	LOC_Os01g03730.1
Os01g0128250	None
Os01g0128300	LOC_Os01g03750
Os01g0128300	LOC_Os01g03750.1
Os01g0128400	LOC_Os01g03760.1
Os01g0128400	LOC_Os01g03760
Os01g0128400	LOC_Os01g03760.2
Os01g0128700	LOC_Os01g03810.1
Os01g0128700	LOC_Os01g03810
Os01g0128800	LOC_Os01g03820.1
Os01g0128800	LOC_Os01g03820
Os01g0129200	LOC_Os01g03840.1
Os01g0129200	LOC_Os01g03840
Os01g0129500	LOC_Os01g03870.1
Os01g0129500	LOC_Os01g03870
Os01g0129550	None
Os01g0129600	LOC_Os01g03890.1
Os01g0129600	LOC_Os01g03890
Os01g0129800	LOC_Os01g03900
Os01g0129800	LOC_Os01g03900.1
Os01g0130000	LOC_Os01g03914
Os01g0130000	LOC_Os01g03914.2
Os01g0130000	LOC_Os01g03914.1
Os01g0130000	LOC_Os01g03914.3
Os01g0130200	LOC_Os01g03940.1
Os01g0130200	LOC_Os01g03940
Os01g0130400	LOC_Os01g03950
Os01g0130400	LOC_Os01g03950.1
Os01g0130500	None
Os01g0130900	LOC_Os01g03980.1
Os01g0130900	LOC_Os01g03980
Os01g0131300	LOC_Os01g04010
Os01g0131300	LOC_Os01g04010.1
Os01g0131450	None
Os01g0131600	LOC_Os01g04020
Os01g0131600	LOC_Os01g04020.1
Os01g0131600	LOC_Os01g04020.2
Os01g0131800	LOC_Os01g04030.1
Os01g0131800	LOC_Os01g04030
Os01g0131900	LOC_Os01g04040.1
Os01g0131900	LOC_Os01g04040
Os01g0132000	LOC_Os01g04050
Os01g0132000	LOC_Os01g04050.1
Os01g0132100	LOC_Os01g04070
Os01g0132100	LOC_Os01g04070.1
Os01g0132400	LOC_Os01g04090.1
Os01g0132400	LOC_Os01g04090
Os01g0132500	LOC_Os01g04100.1
Os01g0132500	LOC_Os01g04100
Os01g0132700	LOC_Os01g04110
Os01g0132700	LOC_Os01g04110.1
Os01g0132766	LOC_Os01g04120.1
Os01g0132766	LOC_Os01g04120
Os01g0133100	LOC_Os01g04160.1
Os01g0133100	LOC_Os01g04160
Os01g0133200	LOC_Os01g04170
Os01g0133200	LOC_Os01g04170.1
Os01g0133500	LOC_Os01g04200
Os01g0133500	LOC_Os01g04200.3
Os01g0133500	LOC_Os01g04200.4
Os01g0133500	LOC_Os01g04200.1
Os01g0133500	LOC_Os01g04200.2
Os01g0133600	LOC_Os01g04210
Os01g0133600	LOC_Os01g04210.1
Os01g0133799	None
Os01g0133832	None
Os01g0133866	None
Os01g0134200	LOC_Os01g04250
Os01g0134200	LOC_Os01g04250.1
Os01g0134500	LOC_Os01g04260
Os01g0134500	LOC_Os01g04260.1
Os01g0134700	LOC_Os01g04280
Os01g0134700	LOC_Os01g04280.1
Os01g0134900	LOC_Os01g04300
Os01g0134900	LOC_Os01g04300.1
Os01g0135600	LOC_Os01g04324
Os01g0135600	LOC_Os01g04324.1
Os01g0135700	LOC_Os01g04330.1
Os01g0135700	LOC_Os01g04330
Os01g0135800	LOC_Os01g04340.1
Os01g0135800	LOC_Os01g04340
Os01g0135900	LOC_Os01g04350
Os01g0135900	LOC_Os01g04350.1
Os01g0136100	LOC_Os01g04370.1
Os01g0136100	LOC_Os01g04370
Os01g0136200	LOC_Os01g04380
Os01g0136200	LOC_Os01g04380.1
Os01g0136400	LOC_Os01g04409.1
Os01g0136400	LOC_Os01g04409
Os01g0136450	None
Os01g0136500	None
Os01g0136600	None
Os01g0136700	LOC_Os01g04440
Os01g0136700	LOC_Os01g04440.1
Os01g0137200	LOC_Os01g04480
Os01g0137200	LOC_Os01g04480.1
Os01g0137232	None
Os01g0137250	LOC_Os01g04480.1
Os01g0137250	LOC_Os01g04480
Os01g0137300	LOC_Os01g04500.1
Os01g0137300	LOC_Os01g04500
Os01g0137400	LOC_Os01g04470.1
Os01g0137400	LOC_Os01g04490.1
Os01g0137400	LOC_Os01g04470
Os01g0137500	LOC_Os01g04520
Os01g0137500	LOC_Os01g04520.1
Os01g0137550	None
Os01g0137950	LOC_Os01g04550
Os01g0137950	LOC_Os01g04550.1
Os01g0138100	None
Os01g0138300	LOC_Os01g04570.2
Os01g0138300	LOC_Os01g04570.1
Os01g0138300	LOC_Os01g04570
Os01g0138400	LOC_Os01g04580
Os01g0138400	LOC_Os01g04580.1
Os01g0138500	LOC_Os01g04590.1
Os01g0138500	LOC_Os01g04590
Os01g0138600	LOC_Os01g04600
Os01g0138600	LOC_Os01g04600.2
Os01g0138600	LOC_Os01g04600.1
Os01g0138800	LOC_Os01g04620.2
Os01g0138800	LOC_Os01g04620.1
Os01g0138800	LOC_Os01g04620.3
Os01g0138800	LOC_Os01g04620
Os01g0138900	LOC_Os01g04630.1
Os01g0138900	LOC_Os01g04630
Os01g0139200	LOC_Os01g04650.1
Os01g0139200	LOC_Os01g04650
Os01g0139600	LOC_Os01g04660.1
Os01g0139600	LOC_Os01g04660
Os01g0139600	LOC_Os01g04660.2
Os01g0139700	LOC_Os01g04670.1
Os01g0139700	LOC_Os01g04670
Os01g0139900	LOC_Os01g04690
Os01g0139900	LOC_Os01g04690.1
Os01g0140100	LOC_Os01g04710
Os01g0140100	LOC_Os01g04710.1
Os01g0140400	LOC_Os01g04720.1
Os01g0140400	LOC_Os01g04720.2
Os01g0140400	LOC_Os01g04720
Os01g0140500	LOC_Os01g04730
Os01g0140500	LOC_Os01g04730.1
Os01g0140700	LOC_Os01g04750
Os01g0140700	LOC_Os01g04750.1
Os01g0141000	LOC_Os01g04800
Os01g0141000	LOC_Os01g04800.1
Os01g0141100	LOC_Os01g04814
Os01g0141100	LOC_Os01g04814.1
Os01g0141100	LOC_Os01g04814.3
Os01g0141100	LOC_Os01g04814.4
Os01g0141600	LOC_Os01g04860.1
Os01g0141600	LOC_Os01g04860
Os01g0141700	LOC_Os01g04870
Os01g0141700	LOC_Os01g04870.1
Os01g0142100	LOC_Os01g04900
Os01g0142100	LOC_Os01g04900.3
Os01g0142100	LOC_Os01g04900.2
Os01g0142100	LOC_Os01g04900.1
Os01g0142200	LOC_Os01g04910
Os01g0142200	LOC_Os01g04910.1
Os01g0142300	LOC_Os01g04920.1
Os01g0142300	LOC_Os01g04920.3
Os01g0142300	LOC_Os01g04920.2
Os01g0142300	LOC_Os01g04920
Os01g0142500	LOC_Os01g04930.1
Os01g0142500	LOC_Os01g04930
Os01g0142600	LOC_Os01g04950.3
Os01g0142600	LOC_Os01g04950
Os01g0142800	LOC_Os01g04950.1
Os01g0142800	LOC_Os01g04950.4
Os01g0142800	LOC_Os01g04950.3
Os01g0142800	LOC_Os01g04950.2
Os01g0142800	LOC_Os01g04950
Os01g0143100	LOC_Os01g04990
Os01g0143100	LOC_Os01g04990.1
Os01g0143100	LOC_Os01g04990.2
Os01g0143300	LOC_Os01g05010.1
Os01g0143300	LOC_Os01g05010
Os01g0143350	None
Os01g0143400	LOC_Os01g05020.1
Os01g0143400	LOC_Os01g05020
Os01g0143800	LOC_Os01g05060.1
Os01g0143800	LOC_Os01g05060
Os01g0143900	LOC_Os01g05064.1
Os01g0143900	LOC_Os01g05064
Os01g0144000	LOC_Os01g05070.2
Os01g0144000	LOC_Os01g05070
Os01g0144000	LOC_Os01g05070.1
Os01g0144100	LOC_Os01g05080.1
Os01g0144100	LOC_Os01g05080.2
Os01g0144100	LOC_Os01g05080
Os01g0144200	LOC_Os01g05090
Os01g0144200	LOC_Os01g05090.1
Os01g0144300	LOC_Os01g05100
Os01g0144300	LOC_Os01g05100.1
Os01g0144500	LOC_Os01g05120.1
Os01g0144500	LOC_Os01g05120
Os01g0144600	LOC_Os01g05130.1
Os01g0144600	LOC_Os01g05130
Os01g0144700	LOC_Os01g05140
Os01g0144700	LOC_Os01g05140.1
Os01g0144900	None
Os01g0145200	LOC_Os01g05180
Os01g0145200	LOC_Os01g05180.1
Os01g0145600	None
Os01g0146200	LOC_Os01g05310.1
Os01g0146200	LOC_Os01g05310
Os01g0147200	LOC_Os01g05420.1
Os01g0147200	LOC_Os01g05420
Os01g0147250	None
Os01g0147300	LOC_Os01g05430.1
Os01g0147300	LOC_Os01g05430
Os01g0147600	LOC_Os01g05460.1
Os01g0147600	LOC_Os01g05450
Os01g0147600	LOC_Os01g05450.1
Os01g0147650	None
Os01g0147800	LOC_Os01g05480.3
Os01g0147800	LOC_Os01g05480.2
Os01g0147800	LOC_Os01g05480.1
Os01g0147800	LOC_Os01g05480
Os01g0147900	LOC_Os01g05490.2
Os01g0147900	LOC_Os01g05490.1
Os01g0147900	LOC_Os01g05490
Os01g0147950	None
Os01g0148000	LOC_Os01g05500.2
Os01g0148000	LOC_Os01g05500
Os01g0148000	LOC_Os01g05500.1
Os01g0148050	LOC_Os01g05500
Os01g0148050	LOC_Os01g05500.2
Os01g0148050	LOC_Os01g05500.1
Os01g0148100	LOC_Os01g05510.4
Os01g0148100	LOC_Os01g05510
Os01g0148100	LOC_Os01g05510.3
Os01g0148100	LOC_Os01g05510.2
Os01g0148100	LOC_Os01g05510.1
Os01g0148100	LOC_Os01g05510.5
Os01g0148400	LOC_Os01g05530
Os01g0148400	LOC_Os01g05530.1
Os01g0148500	LOC_Os01g05540
Os01g0148500	LOC_Os01g05540.1
Os01g0148700	LOC_Os01g05560
Os01g0148700	LOC_Os01g05560.1
Os01g0149200	LOC_Os01g05585.1
Os01g0149200	LOC_Os01g05585
Os01g0149350	LOC_Os01g05600
Os01g0149350	LOC_Os01g05600.1
Os01g0149400	LOC_Os01g05610.1
Os01g0149400	LOC_Os01g05610
Os01g0149500	LOC_Os01g05620.1
Os01g0149500	LOC_Os01g05620
Os01g0149600	LOC_Os01g05630.1
Os01g0149600	LOC_Os01g05630
Os01g0149750	None
Os01g0149800	LOC_Os01g05650.1
Os01g0149800	LOC_Os01g05650
Os01g0149900	LOC_Os01g05660.1
Os01g0149900	LOC_Os01g05660.3
Os01g0149900	LOC_Os01g05660
Os01g0149900	LOC_Os01g05660.2
Os01g0150000	LOC_Os01g05670.1
Os01g0150000	LOC_Os01g05670
Os01g0150100	LOC_Os01g05680.1
Os01g0150100	LOC_Os01g05680
Os01g0150200	LOC_Os01g05694
Os01g0150200	LOC_Os01g05694.1
Os01g0150400	LOC_Os01g05710
Os01g0150400	LOC_Os01g05710.1
Os01g0150700	LOC_Os01g05730
Os01g0150700	LOC_Os01g05730.1
Os01g0150800	LOC_Os01g05744
Os01g0150800	LOC_Os01g05744.1
Os01g0150950	LOC_Os01g05770
Os01g0150950	LOC_Os01g05770.1
Os01g0151100	LOC_Os01g05790.1
Os01g0151100	LOC_Os01g05790
Os01g0151200	LOC_Os01g05800.1
Os01g0151200	LOC_Os01g05800
Os01g0151200	LOC_Os01g05800.2
Os01g0151400	LOC_Os01g05810.1
Os01g0151400	LOC_Os01g05810
Os01g0151500	LOC_Os01g05820.1
Os01g0151500	LOC_Os01g05820
Os01g0151700	LOC_Os01g05840.1
Os01g0151700	LOC_Os01g05840.2
Os01g0151700	LOC_Os01g05840
Os01g0151900	LOC_Os01g05860
Os01g0151900	LOC_Os01g05860.1
Os01g0152000	LOC_Os01g05870.1
Os01g0152000	LOC_Os01g05870
Os01g0152200	LOC_Os01g05890
Os01g0152200	LOC_Os01g05890.1
Os01g0152300	LOC_Os01g05900.1
Os01g0152300	LOC_Os01g05900
Os01g0152600	LOC_Os01g05940.1
Os01g0152600	LOC_Os01g05940
Os01g0152800	LOC_Os01g05960
Os01g0152800	LOC_Os01g05960.1
Os01g0152900	LOC_Os01g05970.1
Os01g0152900	LOC_Os01g05970
Os01g0152950	None
Os01g0153000	LOC_Os01g05980
Os01g0153000	LOC_Os01g05980.1
Os01g0153100	LOC_Os01g05970.1
Os01g0153100	LOC_Os01g05970
Os01g0153150	None
Os01g0153200	LOC_Os01g06000
Os01g0153200	LOC_Os01g06000.1
Os01g0153250	LOC_Os01g06000
Os01g0153250	LOC_Os01g06000.1
Os01g0153300	LOC_Os01g06010
Os01g0153300	LOC_Os01g06010.1
Os01g0153400	LOC_Os01g06020.1
Os01g0153400	LOC_Os01g06020
Os01g0153700	LOC_Os01g06050.2
Os01g0153700	LOC_Os01g06050.1
Os01g0153700	LOC_Os01g06050
Os01g0153800	LOC_Os01g06060.1
Os01g0153800	LOC_Os01g06060
Os01g0154600	LOC_Os01g06150
Os01g0154600	LOC_Os01g06150.1
Os01g0154950	None
Os01g0155000	LOC_Os01g06220
Os01g0155000	LOC_Os01g06220.1
Os01g0155500	LOC_Os01g06280.2
Os01g0155500	LOC_Os01g06280
Os01g0155500	LOC_Os01g06280.1
Os01g0155600	LOC_Os01g06290
Os01g0155600	LOC_Os01g06290.2
Os01g0155600	LOC_Os01g06290.1
Os01g0155600	LOC_Os01g06290.4
Os01g0155600	LOC_Os01g06290.3
Os01g0156300	LOC_Os01g06340.1
Os01g0156300	LOC_Os01g06340
Os01g0157500	LOC_Os01g06430
Os01g0157500	LOC_Os01g06430.1
Os01g0157600	LOC_Os01g06440.1
Os01g0157600	LOC_Os01g06440
Os01g0157700	LOC_Os01g06450.1
Os01g0157700	LOC_Os01g06450
Os01g0157800	LOC_Os01g06454
Os01g0157800	LOC_Os01g06454.1
Os01g0157900	LOC_Os01g06460
Os01g0157900	LOC_Os01g06460.1
Os01g0158100	None
Os01g0158200	LOC_Os01g06490.1
Os01g0158200	LOC_Os01g06490.2
Os01g0158200	LOC_Os01g06490
Os01g0158400	LOC_Os01g06500.1
Os01g0158400	LOC_Os01g06500.2
Os01g0158400	LOC_Os01g06500
Os01g0158500	LOC_Os01g06510
Os01g0158500	LOC_Os01g06510.1
Os01g0158533	None
Os01g0158566	None
Os01g0158600	LOC_Os01g06520
Os01g0158600	LOC_Os01g06520.1
Os01g0159000	LOC_Os01g06560.1
Os01g0159000	LOC_Os01g06560.2
Os01g0159000	LOC_Os01g06560
Os01g0159200	LOC_Os01g06580
Os01g0159200	LOC_Os01g06580.1
Os01g0159250	None
Os01g0159300	LOC_Os01g06590
Os01g0159300	LOC_Os01g06590.3
Os01g0159300	LOC_Os01g06590.1
Os01g0159300	LOC_Os01g06590.2
Os01g0159400	LOC_Os01g06600.2
Os01g0159400	LOC_Os01g06600.1
Os01g0159400	LOC_Os01g06600
Os01g0159800	LOC_Os01g06640.1
Os01g0159800	LOC_Os01g06640
Os01g0159800	LOC_Os01g06640.2
Os01g0159800	LOC_Os01g06640.3
Os01g0160100	LOC_Os01g06660.1
Os01g0160100	LOC_Os01g06660
Os01g0160150	None
Os01g0160700	LOC_Os01g06730
Os01g0160700	LOC_Os01g06730.1
Os01g0161300	LOC_Os01g06790.1
Os01g0161300	LOC_Os01g06790
Os01g0162001	None
Os01g0162200	LOC_Os01g06870
Os01g0162200	LOC_Os01g06870.1
Os01g0162400	LOC_Os01g06882.1
Os01g0162400	LOC_Os01g06882
Os01g0162500	LOC_Os01g06890.1
Os01g0162500	LOC_Os01g06890
Os01g0162701	None
Os01g0162800	LOC_Os01g06900
Os01g0162800	LOC_Os01g06900.1
Os01g0162900	None
Os01g0163000	LOC_Os01g06920
Os01g0163000	LOC_Os01g06920.1
Os01g0164300	LOC_Os01g07060.1
Os01g0164300	LOC_Os01g07060
Os01g0164400	LOC_Os01g07070.1
Os01g0164400	LOC_Os01g07070.4
Os01g0164400	LOC_Os01g07070.3
Os01g0164400	LOC_Os01g07070
Os01g0164400	LOC_Os01g07070.2
Os01g0164500	LOC_Os01g07080.2
Os01g0164500	LOC_Os01g07080.1
Os01g0164500	LOC_Os01g07080
Os01g0164600	LOC_Os01g07090
Os01g0164600	LOC_Os01g07090.1
Os01g0164700	LOC_Os01g07100
Os01g0164700	LOC_Os01g07100.1
Os01g0164800	LOC_Os01g07110.1
Os01g0164800	LOC_Os01g07110
Os01g0164900	LOC_Os01g07110.1
Os01g0164900	LOC_Os01g07110
Os01g0165000	LOC_Os01g07120
Os01g0165000	LOC_Os01g07120.1
Os01g0165000	LOC_Os01g07120.2
Os01g0165100	LOC_Os01g07130.1
Os01g0165100	LOC_Os01g07130
Os01g0165200	LOC_Os01g07140
Os01g0165200	LOC_Os01g07140.2
Os01g0165200	LOC_Os01g07140.1
Os01g0165600	LOC_Os01g07150.1
Os01g0165600	LOC_Os01g07150
Os01g0165800	LOC_Os01g07170.1
Os01g0165800	LOC_Os01g07170
Os01g0166100	LOC_Os01g07200
Os01g0166100	LOC_Os01g07200.1
Os01g0166200	None
Os01g0166300	LOC_Os01g07212.1
Os01g0166300	LOC_Os01g07212
Os01g0166400	LOC_Os01g07212.1
Os01g0166400	LOC_Os01g07212
Os01g0166500	LOC_Os01g07240.1
Os01g0166500	LOC_Os01g07240
Os01g0166700	LOC_Os01g07250.1
Os01g0166700	LOC_Os01g07250
Os01g0166800	LOC_Os01g07260.1
Os01g0166800	LOC_Os01g07260
Os01g0167100	None
Os01g0167400	LOC_Os01g07300.2
Os01g0167400	LOC_Os01g07300.1
Os01g0167400	LOC_Os01g07300
Os01g0167500	LOC_Os01g07310.4
Os01g0167500	LOC_Os01g07310.1
Os01g0167500	LOC_Os01g07310
Os01g0167500	LOC_Os01g07310.2
Os01g0167500	LOC_Os01g07310.3
Os01g0167600	LOC_Os01g07320
Os01g0167600	LOC_Os01g07320.1
Os01g0167700	LOC_Os01g07330.3
Os01g0167700	LOC_Os01g07330.1
Os01g0167700	LOC_Os01g07330
Os01g0167700	LOC_Os01g07330.4
Os01g0167700	LOC_Os01g07330.2
Os01g0167750	LOC_Os01g07340
Os01g0167750	LOC_Os01g07340.1
Os01g0167800	LOC_Os01g07350.1
Os01g0167800	LOC_Os01g07350
Os01g0167900	LOC_Os01g07360.2
Os01g0167900	LOC_Os01g07360.1
Os01g0167900	LOC_Os01g07360
Os01g0167900	LOC_Os01g07360.4
Os01g0167900	LOC_Os01g07360.3
Os01g0168100	LOC_Os01g07370
Os01g0168100	LOC_Os01g07370.2
Os01g0168100	LOC_Os01g07370.1
Os01g0168200	LOC_Os01g07376
Os01g0168200	LOC_Os01g07376.1
Os01g0168300	LOC_Os01g07382
Os01g0168300	LOC_Os01g07382.1
Os01g0168350	None
Os01g0168400	LOC_Os01g07390.1
Os01g0168400	LOC_Os01g07390
[truncated: 55,960 more rows]

## Sheet: unionFC
OS_GENEID	I64_v_Kharsu.log2FC	I64_v_KHO.log2FC	I64_v_MR.log2FC	I64_v_Nanhi.log2FC	I42_v_Kharsu.log2FC	I42_v_KHO.log2FC	I42_v_MR.log2FC	I42_v_Nanhi.log2FC			OS_GENEID	average	sdtev
Os01g0100100	ns	ns	ns	0.705186	ns	ns	ns	0.781657			Os01g0100100	0.743421	0.0540733
Os01g0100400	ns	ns	ns	-1.48568	ns	ns	ns	ns			Os01g0100400	-1.48568	#DIV/0!
Os01g0100500	ns	ns	ns	0.195744	ns	ns	ns	ns			Os01g0100500	0.195744	#DIV/0!
Os01g0100700	-0.479588	-1.52695	-0.683796	-1.59987	ns	ns	ns	ns			Os01g0100700	-1.07255	0.573665
Os01g0100800	-1.02932	-0.795255	-0.55921	-1.22016	ns	ns	ns	-0.815202			Os01g0100800	-0.883831	0.251109
Os01g0101150	ns	ns	ns	ns	10.0439	10.5591	10.1703	0.649916			Os01g0101150	7.85579	4.80891
Os01g0101175	ns	0.335674	ns	ns	ns	ns	ns	ns			Os01g0101175	0.335674	#DIV/0!
Os01g0101200	ns	ns	ns	ns	ns	ns	ns	-0.545913			Os01g0101200	-0.545913	#DIV/0!
Os01g0101300	-0.40297	ns	-0.560918	0.411613	ns	ns	-0.539655	0.463059			Os01g0101300	-0.125774	0.517927
Os01g0101600	ns	ns	ns	0.757387	ns	ns	ns	0.698312			Os01g0101600	0.72785	0.0417722
Os01g0101700	0.602109	ns	ns	1.153	ns	ns	ns	1.07579			Os01g0101700	0.943635	0.298279
Os01g0101800	ns	-2.36427	-2.85435	-2.41715	ns	-1.38031	-1.96077	-1.48808			Os01g0101800	-2.07749	0.574146
Os01g0102300	ns	ns	1.3327	ns	ns	ns	ns	ns			Os01g0102300	1.3327	#DIV/0!
Os01g0102400	ns	ns	ns	5.28051	ns	ns	ns	ns			Os01g0102400	5.28051	#DIV/0!
Os01g0102500	ns	ns	ns	1.30144	ns	ns	ns	ns			Os01g0102500	1.30144	#DIV/0!
Os01g0102700	ns	-0.582489	ns	ns	ns	ns	ns	ns			Os01g0102700	-0.582489	#DIV/0!
Os01g0102800	ns	0.990337	0.629065	1.72621	ns	ns	ns	1.2253			Os01g0102800	1.14273	0.459832
Os01g0102850	ns	ns	ns	-0.880599	ns	ns	ns	ns			Os01g0102850	-0.880599	#DIV/0!
Os01g0102900	ns	1.59331	ns	1.59541	ns	ns	ns	1.45638			Os01g0102900	1.54837	0.0796658
Os01g0103000	-0.694001	-1.16447	-0.990025	-1.80527	ns	ns	ns	-0.897318			Os01g0103000	-1.11022	0.423983
Os01g0103050	-0.689043	-1.28305	-1.08347	-2.50508	ns	ns	ns	-1.65792			Os01g0103050	-1.44371	0.688747
Os01g0103100	ns	ns	-1.42708	0.990901	ns	ns	ns	1.15905			Os01g0103100	0.240958	1.44701
Os01g0103400	-10.2232	ns	ns	-2.37447	-8.39568	1.29598	ns	-0.798489			Os01g0103400	-4.09917	4.97344
Os01g0103600	ns	ns	ns	-0.873696	ns	ns	ns	-0.605161			Os01g0103600	-0.739429	0.189883
Os01g0103700	ns	ns	ns	-1.12889	ns	ns	ns	-1.25286			Os01g0103700	-1.19088	0.0876587
Os01g0103800	-0.264516	-0.465791	-0.657076	-0.414144	ns	ns	-0.542107	ns			Os01g0103800	-0.468727	0.146245
Os01g0103900	-0.946485	-1.78884	-1.93855	-1.2598	ns	ns	ns	ns			Os01g0103900	-1.48342	0.461421
Os01g0104100	ns	ns	ns	0.652879	ns	ns	ns	0.721342			Os01g0104100	0.687111	0.0484102
Os01g0104350	ns	ns	1.64435	ns	ns	ns	1.90342	ns			Os01g0104350	1.77388	0.183187
Os01g0104400	ns	ns	-0.559646	-1.39559	ns	ns	ns	-1.1253			Os01g0104400	-1.02684	0.426579
Os01g0104500	ns	ns	ns	2.20094	ns	ns	ns	ns			Os01g0104500	2.20094	#DIV/0!
Os01g0104600	ns	-0.515111	ns	ns	ns	-0.57374	ns	ns			Os01g0104600	-0.544425	0.0414568
Os01g0104800	-0.840722	-1.21482	-0.65658	-0.861827	ns	ns	ns	ns			Os01g0104800	-0.893487	0.233214
Os01g0104900	ns	ns	-0.470812	-1.21004	ns	ns	-0.845709	-1.55274			Os01g0104900	-1.01982	0.466157
Os01g0105300	-2.19543	ns	-3.84788	-4.64321	-3.02174	-1.67081	-4.66658	-5.42532			Os01g0105300	-3.63871	1.39269
Os01g0105400	-0.367726	-1.69035	-2.98706	-1.84972	-0.879711	-2.21407	-3.49914	-2.32641			Os01g0105400	-1.97677	1.0287
Os01g0105700	-2.18079	-1.48922	-1.89816	-0.996332	-2.36288	-1.66043	-2.0732	-1.13422			Os01g0105700	-1.7244	0.493617
Os01g0105800	ns	ns	ns	-0.858556	ns	ns	ns	ns			Os01g0105800	-0.858556	#DIV/0!
Os01g0105900	ns	ns	-2.18162	ns	-0.947851	ns	-2.86964	-0.661641			Os01g0105900	-1.66519	1.03908
Os01g0106200	ns	-0.549821	-0.522527	ns	ns	ns	ns	ns			Os01g0106200	-0.536174	0.0192999
Os01g0106300	ns	-3.05468	-2.68001	ns	ns	-3.19333	-2.78414	ns			Os01g0106300	-2.92804	0.237096
Os01g0106400	ns	-3.30463	-9.36483	-4.35295	ns	ns	-6.62178	-1.7553			Os01g0106400	-5.0799	2.97788
Os01g0106500	ns	ns	0.603602	-0.850381	ns	ns	0.902381	ns			Os01g0106500	0.218534	0.937684
Os01g0106600	0.795658	ns	ns	0.684872	0.962081	ns	ns	0.888896			Os01g0106600	0.832877	0.119892
Os01g0106700	ns	ns	ns	-1.57848	ns	ns	ns	-1.23769			Os01g0106700	-1.40808	0.24097
Os01g0106800	ns	ns	ns	-0.457523	ns	ns	ns	ns			Os01g0106800	-0.457523	#DIV/0!
Os01g0106900	-0.482931	-0.834694	-0.706926	-0.726961	ns	ns	-0.467804	-0.454609			Os01g0106900	-0.612321	0.163733
Os01g0107000	ns	-0.521906	ns	ns	ns	ns	ns	ns			Os01g0107000	-0.521906	#DIV/0!
Os01g0107700	ns	ns	-1.41779	-0.815946	-0.558231	-1.67702	-2.08497	-1.43713			Os01g0107700	-1.33185	0.560259
Os01g0107750	ns	ns	ns	ns	ns	ns	-3.496	ns			Os01g0107750	-3.496	#DIV/0!
Os01g0107900	ns	0.305538	0.422945	0.29749	ns	ns	ns	ns			Os01g0107900	0.341991	0.0702238
Os01g0108000	ns	ns	ns	0.922905	ns	ns	ns	0.544833			Os01g0108000	0.733869	0.267337
Os01g0108200	-0.402936	ns	ns	-0.57201	ns	ns	ns	ns			Os01g0108200	-0.487473	0.119553
Os01g0108400	ns	ns	ns	ns	ns	ns	ns	-4.13448			Os01g0108400	-4.13448	#DIV/0!
Os01g0108600	-0.960522	ns	-3.4245	ns	-1.80872	ns	-4.36655	ns			Os01g0108600	-2.64007	1.53927
Os01g0108800	ns	-1.42216	-1.34425	-1.81813	ns	ns	ns	-1.28741			Os01g0108800	-1.46799	0.239872
Os01g0109000	-0.862149	ns	ns	-1.20653	ns	ns	ns	-0.779779			Os01g0109000	-0.949487	0.226387
Os01g0109201	ns	ns	-1.71447	ns	ns	ns	-2.16782	ns			Os01g0109201	-1.94114	0.320566
Os01g0109300	ns	ns	-1.42381	ns	ns	ns	-2.3605	ns			Os01g0109300	-1.89216	0.662344
Os01g0109432	ns	1.70036	1.10341	ns	ns	ns	1.09638	ns			Os01g0109432	1.30005	0.346698
Os01g0109500	ns	1.33884	1.23426	ns	ns	1.47849	1.49398	ns			Os01g0109500	1.38639	0.123101
Os01g0109700	ns	0.395932	ns	0.495659	ns	ns	ns	ns			Os01g0109700	0.445796	0.0705179
Os01g0110100	ns	ns	1.9323	2.74994	ns	ns	2.66708	3.46845			Os01g0110100	2.70444	0.628062
Os01g0110200	2.85355	ns	ns	ns	5.77006	ns	ns	3.80319			Os01g0110200	4.14227	1.48753
Os01g0110400	0.285734	0.834543	0.383356	0.852048	ns	ns	ns	ns			Os01g0110400	0.58892	0.296505
Os01g0110500	ns	1.13223	ns	0.755123	ns	ns	-1.21357	ns			Os01g0110500	0.224596	1.25968
Os01g0110600	ns	2.63585	ns	ns	ns	ns	-2.56057	ns			Os01g0110600	0.0376397	3.67442
Os01g0110700	ns	-0.684313	-1.19638	-1.26491	ns	-0.865537	-1.40496	-1.43648			Os01g0110700	-1.1421	0.303261
Os01g0110800	ns	1.07235	0.415908	-1.01665	-1.23506	ns	ns	-2.24087			Os01g0110800	-0.600864	1.33212
Os01g0111100	3.03664	1.5055	2.85667	ns	2.33409	ns	2.15653	ns			Os01g0111100	2.37789	0.607282
Os01g0111300	ns	ns	0.717672	-0.813425	ns	ns	0.737258	-0.745576			Os01g0111300	-0.0260178	0.870524
Os01g0111400	ns	0.897023	0.868649	1.03167	ns	ns	ns	ns			Os01g0111400	0.932447	0.087092
Os01g0111600	2.15079	3.18687	3.73227	-1.88059	4.02723	5.07393	5.62367	ns			Os01g0111600	3.1306	2.49109
Os01g0111700	ns	2.98937	ns	2.75545	ns	ns	ns	ns			Os01g0111700	2.87241	0.165403
Os01g0111800	0.691313	ns	0.599904	0.714009	0.987479	ns	0.892929	1.03895			Os01g0111800	0.820764	0.177505
Os01g0111900	0.649575	ns	ns	0.632921	1.22449	ns	0.837052	1.23088			Os01g0111900	0.914985	0.296505
Os01g0112000	ns	ns	-0.621979	-0.409449	ns	ns	ns	ns			Os01g0112000	-0.515714	0.150282
Os01g0112050	ns	ns	ns	0.716978	-1.46811	ns	ns	ns			Os01g0112050	-0.375565	1.54509
Os01g0112100	-0.814393	ns	ns	-0.562716	ns	ns	ns	ns			Os01g0112100	-0.688555	0.177963
Os01g0112300	-0.544692	ns	0.526218	ns	-0.509222	ns	0.55812	ns			Os01g0112300	0.00760582	0.617568
Os01g0112500	0.391058	1.24853	1.34888	0.777523	ns	0.924146	1.08867	ns			Os01g0112500	0.963135	0.349071
Os01g0112600	ns	1.70565	ns	ns	ns	ns	ns	-1.06447			Os01g0112600	0.32059	1.95877
Os01g0112800	ns	-2.55013	-5.11138	-8.24855	ns	ns	-4.15294	-7.23663			Os01g0112800	-5.45993	2.30379
Os01g0113000	-2.7803	-2.31207	-1.70862	-7.30739	-3.46449	-3.00817	-2.38891	-7.97532			Os01g0113000	-3.86816	2.39214
Os01g0113150	ns	-2.0835	-4.53928	-7.48522	ns	ns	-3.6356	-6.53586			Os01g0113150	-4.85589	2.18009
Os01g0113200	ns	2.05964	ns	ns	ns	1.44017	ns	ns			Os01g0113200	1.7499	0.43803
Os01g0113300	1.47122	1.94999	1.65802	ns	ns	ns	0.758938	ns			Os01g0113300	1.45954	0.506924
Os01g0113325	1.99364	2.10301	1.60759	1.11409	ns	ns	ns	ns			Os01g0113325	1.70458	0.447357
Os01g0113350	-1.46703	ns	ns	-1.88633	ns	ns	ns	-2.00251			Os01g0113350	-1.78529	0.281676
Os01g0113400	2.56193	2.69945	3.30217	-0.883568	2.50616	2.62146	3.24961	ns			Os01g0113400	2.29389	1.43846
Os01g0113450	7.08439	6.91963	0.460456	ns	7.04488	6.82356	8.11062	ns			Os01g0113450	6.07392	2.78927
Os01g0113500	-6.37662	ns	-3.83793	-0.656221	-6.7482	-1.03405	-4.19606	-0.960254			Os01g0113500	-3.40133	2.58117
Os01g0113600	-0.413442	ns	ns	0.411524	-1.22031	ns	-0.994362	ns			Os01g0113600	-0.554148	0.727985
Os01g0113650	ns	3.46412	ns	2.42056	-2.54843	ns	-1.97463	ns			Os01g0113650	0.340409	3.04354
Os01g0113700	-1.14723	ns	ns	-1.02802	-1.25166	ns	ns	-1.08655			Os01g0113700	-1.12837	0.095523
Os01g0113800	-1.4102	0.925253	ns	ns	-1.94777	ns	ns	ns			Os01g0113800	-0.810906	1.52739
Os01g0114100	0.587769	ns	ns	-0.915101	0.398622	ns	ns	-1.06442			Os01g0114100	-0.248282	0.861818
Os01g0114150	0.877197	ns	ns	ns	ns	ns	-0.876933	-1.13208			Os01g0114150	-0.377272	1.09387
Os01g0114200	0.625824	ns	ns	-3.35648	ns	ns	ns	-2.22278			Os01g0114200	-1.65115	2.05177
Os01g0114300	ns	0.948465	ns	ns	ns	ns	ns	ns			Os01g0114300	0.948465	#DIV/0!
Os01g0114550	ns	5.41643	6.14971	ns	ns	2.75162	3.61233	ns			Os01g0114550	4.48252	1.57109
Os01g0114600	11.1635	ns	ns	ns	ns	ns	ns	-0.299711			Os01g0114600	5.43188	8.10569
Os01g0114650	7.32356	ns	ns	ns	ns	ns	ns	ns			Os01g0114650	7.32356	#DIV/0!
Os01g0114700	5.35899	ns	ns	ns	1.97509	ns	ns	-5.53811			Os01g0114700	0.598656	5.57742
Os01g0114800	1.044	ns	ns	-8.48221	ns	ns	ns	-8.27573			Os01g0114800	-5.23798	5.44133
Os01g0114900	ns	ns	ns	-3.61248	ns	ns	ns	-3.14427			Os01g0114900	-3.37838	0.331073
Os01g0115100	ns	ns	-2.60566	-1.93172	ns	ns	ns	ns			Os01g0115100	-2.26869	0.476547
Os01g0115300	ns	ns	-1.83234	-2.20863	ns	ns	-1.10069	-1.45608			Os01g0115300	-1.64944	0.477724
Os01g0115600	-1.60791	ns	-5.0701	-2.01617	-0.992675	ns	-4.39814	-1.36907			Os01g0115600	-2.57568	1.71784
Os01g0115700	8.41688	ns	8.91868	9.36341	8.38935	ns	8.88136	9.38977			Os01g0115700	8.89324	0.435708
Os01g0115725	0.525079	ns	ns	5.03419	ns	ns	ns	4.96758			Os01g0115725	3.50895	2.58432
Os01g0115750	6.07669	ns	ns	4.97197	4.971	ns	ns	4.10251			Os01g0115750	5.03054	0.808836
Os01g0115752	3.58098	ns	ns	ns	ns	ns	ns	ns			Os01g0115752	3.58098	#DIV/0!
Os01g0115800	ns	ns	ns	-1.1808	ns	ns	ns	ns			Os01g0115800	-1.1808	#DIV/0!
Os01g0115900	1.59807	0.954471	0.848735	-0.799578	1.57622	ns	0.833105	ns			Os01g0115900	0.835171	0.873841
Os01g0116000	ns	ns	9.62532	ns	ns	ns	9.59355	ns			Os01g0116000	9.60944	0.0224602
Os01g0116400	-3.11191	ns	-1.97537	-7.50377	-3.24872	ns	-2.09136	-7.63571			Os01g0116400	-4.26114	2.61461
Os01g0116600	ns	-0.410531	ns	-0.67068	ns	ns	ns	ns			Os01g0116600	-0.540606	0.183953
Os01g0116650	-9.36226	ns	-9.73052	-10.1255	-9.54114	ns	-9.91466	-10.2705			Os01g0116650	-9.8241	0.346533
Os01g0116800	2.39547	ns	3.03514	-7.53667	2.33933	ns	2.97154	-7.59881			Os01g0116800	-0.732333	5.30242
Os01g0116900	ns	ns	ns	-4.19558	ns	ns	ns	-4.55601			Os01g0116900	-4.37579	0.254863
Os01g0116901	ns	ns	3.00795	-2.7113	ns	ns	3.60912	-2.05298			Os01g0116901	0.463195	3.30561
Os01g0117000	3.09436	2.98462	3.38226	2.73847	3.90982	3.69241	4.20348	3.60871			Os01g0117000	3.45177	0.495265
Os01g0117025	2.46548	ns	3.79025	ns	2.57133	ns	4.01037	ns			Os01g0117025	3.20936	0.80405
Os01g0117050	ns	8.84036	ns	8.52093	ns	8.78989	ns	8.55137			Os01g0117050	8.67564	0.162854
Os01g0117100	ns	3.12865	1.71565	2.93501	ns	1.87098	ns	1.71901			Os01g0117100	2.27386	0.69813
Os01g0117400	ns	2.71574	ns	ns	ns	ns	ns	ns			Os01g0117400	2.71574	#DIV/0!
Os01g0117600	ns	ns	ns	6.60541	ns	ns	ns	6.63376			Os01g0117600	6.61958	0.0200476
Os01g0117700	ns	1.74632	ns	ns	ns	ns	ns	ns			Os01g0117700	1.74632	#DIV/0!
Os01g0117900	0.683881	ns	0.884991	2.30029	ns	ns	ns	1.27326			Os01g0117900	1.28561	0.719327
Os01g0118000	ns	-0.950957	-1.19828	ns	ns	-0.567209	-0.81589	0.557753			Os01g0118000	-0.594917	0.683568
Os01g0118066	ns	ns	-0.98028	ns	ns	ns	ns	ns			Os01g0118066	-0.98028	#DIV/0!
Os01g0118100	-0.807269	ns	-0.781399	0.49631	-1.02207	ns	-0.984814	ns			Os01g0118100	-0.619849	0.632854
Os01g0118300	-0.856843	ns	-1.82622	-2.81448	-0.761357	ns	-1.71149	-2.66725			Os01g0118300	-1.77294	0.866458
Os01g0118350	ns	ns	-1.15827	-2.33312	ns	ns	-1.28898	-2.42161			Os01g0118350	-1.8005	0.669222
Os01g0118400	ns	ns	0.654959	1.04779	ns	ns	0.987251	1.41548			Os01g0118400	1.02637	0.31163
Os01g0118700	0.536394	ns	0.921654	2.73197	ns	ns	ns	2.10175			Os01g0118700	1.57294	1.02006
Os01g0119000	ns	ns	1.17453	1.45706	ns	ns	1.16337	1.51053			Os01g0119000	1.32637	0.183138
Os01g0119050	ns	1.11332	-1.51097	ns	ns	ns	-2.46076	ns			Os01g0119050	-0.952804	1.85126
Os01g0119100	ns	ns	-1.40738	0.970348	ns	ns	-1.89145	ns			Os01g0119100	-0.776161	1.53176
Os01g0119500	-1.19341	ns	-0.881014	ns	-1.59925	ns	-1.26813	ns			Os01g0119500	-1.23545	0.29485
Os01g0119800	-2.75751	ns	-5.46165	ns	-3.12394	ns	-5.82245	ns			Os01g0119800	-4.29139	1.57368
Os01g0120300	3.84185	ns	ns	3.0349	3.81075	ns	ns	3.04022			Os01g0120300	3.43193	0.455561
Os01g0120400	-1.14609	-1.46617	-1.41552	ns	ns	-1.40972	-1.40497	ns			Os01g0120400	-1.36849	0.126736
Os01g0120500	ns	ns	0.680663	ns	ns	ns	ns	ns			Os01g0120500	0.680663	#DIV/0!
Os01g0120600	-1.39161	ns	-1.39109	0.802962	-2.1345	ns	-2.11712	ns			Os01g0120600	-1.24627	1.20299
Os01g0120700	ns	1.20681	0.898669	1.20519	ns	ns	ns	ns			Os01g0120700	1.10356	0.177439
Os01g0120800	-0.701824	-0.88315	-0.473196	-0.554705	ns	ns	ns	ns			Os01g0120800	-0.653219	0.180133
Os01g0121000	ns	1.10081	1.0611	ns	ns	ns	ns	ns			Os01g0121000	1.08096	0.0280774
Os01g0121100	ns	ns	0.423075	0.348289	-0.513858	ns	ns	ns			Os01g0121100	0.085835	0.520694
Os01g0121200	ns	ns	ns	-0.966445	ns	ns	ns	-0.844911			Os01g0121200	-0.905678	0.0859375
Os01g0121300	-1.1783	ns	-1.25454	ns	-1.51054	-1.05438	-1.57882	ns			Os01g0121300	-1.31532	0.222544
Os01g0121500	ns	2.93834	ns	2.81776	-1.76234	ns	-2.48285	ns			Os01g0121500	0.377726	2.90248
Os01g0121600	1.22952	4.27708	-1.11682	2.70128	-2.9544	ns	-5.986	ns			Os01g0121600	-0.308222	3.80368
Os01g0121700	ns	0.707334	1.38108	ns	ns	0.774569	1.46876	ns			Os01g0121700	1.08294	0.39746
Os01g0121800	ns	ns	-0.342851	0.631471	ns	ns	ns	ns			Os01g0121800	0.14431	0.68895
Os01g0123500	-1.28288	ns	ns	-1.86357	-6.24028	ns	ns	-3.77051			Os01g0123500	-3.28931	2.23594
Os01g0123900	-3.83894	ns	-1.75807	-4.40728	ns	ns	ns	ns			Os01g0123900	-3.33476	1.39471
Os01g0124000	-4.65284	-3.7488	-3.26107	-3.14285	ns	ns	ns	ns			Os01g0124000	-3.70139	0.686382
Os01g0124100	ns	-0.977797	-1.23803	-0.634951	ns	ns	-0.837495	ns			Os01g0124100	-0.922068	0.253328
Os01g0124200	ns	ns	-0.807693	-0.808851	ns	ns	-0.732795	-0.671598			Os01g0124200	-0.755234	0.0661446
Os01g0124401	ns	ns	ns	-1.14095	ns	ns	ns	-0.818342			Os01g0124401	-0.979646	0.228118
Os01g0124550	-1.5035	ns	-4.25282	-2.44821	ns	ns	-2.77021	ns			Os01g0124550	-2.74369	1.1407
Os01g0124650	ns	2.64036	2.85992	1.36045	ns	1.33142	1.65337	ns			Os01g0124650	1.96911	0.728172
Os01g0124700	0.37122	9.5757	10.0409	0.321718	ns	ns	ns	ns			Os01g0124700	5.07737	5.46611
Os01g0124900	7.86861	ns	ns	7.06691	7.83599	ns	ns	7.11993			Os01g0124900	7.47286	0.438879
Os01g0125550	-1.72168	ns	ns	-2.29068	ns	ns	ns	-1.34897			Os01g0125550	-1.78711	0.474252
Os01g0125600	0.467408	ns	ns	0.675231	ns	ns	ns	ns			Os01g0125600	0.57132	0.146953
Os01g0125700	ns	ns	ns	-0.598024	ns	ns	ns	-0.453113			Os01g0125700	-0.525569	0.102467
Os01g0125800	ns	ns	ns	ns	ns	ns	0.65078	ns			Os01g0125800	0.65078	#DIV/0!
Os01g0125900	ns	ns	ns	0.7244	ns	ns	ns	0.738964			Os01g0125900	0.731682	0.0102982
Os01g0126100	-0.91132	ns	ns	-1.61056	-1.42082	ns	ns	-2.08414			Os01g0126100	-1.50671	0.485139
Os01g0126200	1.6433	-1.82847	ns	-1.20539	2.10344	ns	1.10171	ns			Os01g0126200	0.362921	1.7661
Os01g0126401	ns	ns	2.51488	ns	ns	ns	2.92985	ns			Os01g0126401	2.72236	0.293429
Os01g0126600	ns	ns	2.08923	-1.93128	ns	ns	2.52091	ns			Os01g0126600	0.892957	2.45537
Os01g0126900	ns	ns	0.538598	2.36176	ns	ns	ns	2.1557			Os01g0126900	1.68535	0.998447
Os01g0127000	ns	ns	1.12585	ns	ns	ns	ns	ns			Os01g0127000	1.12585	#DIV/0!
Os01g0127200	ns	ns	1.53992	ns	ns	ns	2.24497	ns			Os01g0127200	1.89244	0.498543
Os01g0127300	ns	ns	ns	0.310447	ns	ns	ns	ns			Os01g0127300	0.310447	#DIV/0!
Os01g0127400	ns	ns	ns	-0.741852	ns	ns	ns	ns			Os01g0127400	-0.741852	#DIV/0!
Os01g0127600	ns	ns	-6.59513	ns	-2.0608	ns	-8.17191	ns			Os01g0127600	-5.60928	3.17259
Os01g0127700	-0.978301	1.33542	ns	ns	-1.943	ns	ns	-1.03821			Os01g0127700	-0.656023	1.39906
Os01g0127900	ns	ns	-0.777141	ns	ns	ns	-1.38821	-0.859862			Os01g0127900	-1.0084	0.331511
Os01g0128000	1.16046	1.93412	0.993825	ns	ns	ns	ns	ns			Os01g0128000	1.3628	0.501741
Os01g0128100	ns	-1.46661	-2.51144	-2.27792	ns	-1.45462	-2.57385	-2.28501			Os01g0128100	-2.09491	0.505419
Os01g0128200	1.04794	ns	ns	1.00452	1.27742	ns	ns	1.26152			Os01g0128200	1.14785	0.141701
Os01g0128250	1.24566	ns	ns	1.80463	ns	ns	ns	ns			Os01g0128250	1.52514	0.395252
Os01g0128300	ns	ns	ns	0.375768	ns	ns	-0.960364	ns			Os01g0128300	-0.292298	0.944788
Os01g0128400	-0.548594	-0.3395	-0.471295	ns	-0.558742	ns	ns	ns			Os01g0128400	-0.479533	0.101194
Os01g0128700	ns	0.765558	ns	ns	-1.12434	ns	ns	ns			Os01g0128700	-0.17939	1.33636
Os01g0128800	ns	0.728221	ns	ns	-1.09053	ns	ns	-0.720521			Os01g0128800	-0.360943	0.961216
Os01g0129200	ns	0.834758	ns	ns	ns	ns	ns	ns			Os01g0129200	0.834758	#DIV/0!
Os01g0129500	ns	ns	ns	-1.16537	ns	ns	ns	-1.14639			Os01g0129500	-1.15588	0.0134221
Os01g0129550	ns	ns	ns	ns	ns	ns	ns	-0.962012			Os01g0129550	-0.962012	#DIV/0!
Os01g0129600	ns	-1.12156	ns	0.694491	ns	ns	ns	1.74506			Os01g0129600	0.439329	1.45024
Os01g0129800	ns	-1.43167	-0.636816	-0.977376	ns	-1.27776	ns	-0.895762			Os01g0129800	-1.04388	0.315096
Os01g0130000	ns	-0.618759	ns	-0.674684	ns	ns	ns	ns			Os01g0130000	-0.646722	0.039545
Os01g0130200	ns	ns	-2.62822	1.5307	ns	ns	-3.10896	ns			Os01g0130200	-1.40216	2.55128
Os01g0130400	ns	-0.84989	-0.870479	-0.704251	ns	ns	ns	ns			Os01g0130400	-0.808207	0.0906148
Os01g0130500	ns	ns	ns	ns	-1.56191	ns	ns	ns			Os01g0130500	-1.56191	#DIV/0!
Os01g0130900	0.885668	ns	ns	ns	ns	ns	ns	ns			Os01g0130900	0.885668	#DIV/0!
Os01g0131300	ns	0.489123	ns	0.39273	ns	ns	ns	ns			Os01g0131300	0.440927	0.0681606
Os01g0131450	0.477973	1.17008	0.996378	ns	ns	ns	ns	ns			Os01g0131450	0.881477	0.360076
Os01g0131600	ns	1.16393	1.00055	ns	ns	ns	ns	ns			Os01g0131600	1.08224	0.115523
Os01g0131800	ns	-0.763812	ns	-0.9899	ns	ns	ns	ns			Os01g0131800	-0.876856	0.159868
Os01g0131900	ns	ns	-1.55703	-2.10358	ns	ns	ns	-1.71478			Os01g0131900	-1.79179	0.281296
Os01g0132000	-0.885697	ns	-1.91545	1.2478	-1.64316	ns	-2.68133	ns			Os01g0132000	-1.17557	1.49918
Os01g0132100	ns	ns	ns	ns	ns	0.472559	ns	ns			Os01g0132100	0.472559	#DIV/0!
Os01g0132400	ns	ns	ns	5.20488	ns	ns	ns	ns			Os01g0132400	5.20488	#DIV/0!
Os01g0132500	0.56528	1.53397	ns	1.24496	ns	ns	ns	ns			Os01g0132500	1.11474	0.497302
Os01g0132700	ns	ns	ns	-0.525248	ns	ns	ns	ns			Os01g0132700	-0.525248	#DIV/0!
Os01g0132766	1.63929	1.28622	1.04203	1.56757	ns	ns	ns	1.08664			Os01g0132766	1.32435	0.272037
Os01g0133100	ns	ns	-0.36352	ns	ns	ns	-0.988257	ns			Os01g0133100	-0.675888	0.441756
Os01g0133200	ns	-1.58277	-1.54938	-0.901409	ns	ns	-1.27617	ns			Os01g0133200	-1.32743	0.31548
Os01g0133500	ns	-0.629084	-0.684528	-0.703016	ns	ns	ns	ns			Os01g0133500	-0.67221	0.0384745
Os01g0133600	ns	ns	-2.04948	-2.14528	ns	ns	-1.75108	-1.85112			Os01g0133600	-1.94924	0.180163
Os01g0133799	ns	ns	-1.17337	ns	ns	ns	ns	ns			Os01g0133799	-1.17337	#DIV/0!
Os01g0133832	ns	ns	ns	ns	0.85057	ns	ns	ns			Os01g0133832	0.85057	#DIV/0!
Os01g0133866	1.09013	ns	ns	ns	ns	ns	ns	ns			Os01g0133866	1.09013	#DIV/0!
Os01g0134200	-4.93297	ns	-3.15448	ns	-4.93414	ns	-3.14136	ns			Os01g0134200	-4.04074	1.03095
Os01g0134500	0.483026	ns	ns	-0.868001	ns	ns	ns	-1.17974			Os01g0134500	-0.521573	0.883862
Os01g0134700	ns	1.19258	ns	1.83738	-1.78147	ns	-1.76443	ns			Os01g0134700	-0.128984	1.91647
Os01g0134900	ns	ns	-0.830206	ns	ns	ns	-0.928732	ns			Os01g0134900	-0.879469	0.0696686
Os01g0135600	2.7901	1.43561	2.18545	-2.09056	1.45965	ns	ns	-3.83677			Os01g0135600	0.323913	2.65383
Os01g0135700	ns	ns	-1.80863	0.809047	ns	ns	-3.34251	ns			Os01g0135700	-1.44736	2.09922
Os01g0135800	2.42238	ns	ns	ns	ns	ns	ns	ns			Os01g0135800	2.42238	#DIV/0!
Os01g0135900	3.43768	ns	ns	4.24871	2.36752	ns	ns	3.39075			Os01g0135900	3.36116	0.770669
Os01g0136100	1.76906	ns	ns	-0.580673	2.08795	ns	ns	ns			Os01g0136100	1.09211	1.45742
Os01g0136200	1.54197	ns	ns	0.8603	1.59131	ns	ns	0.957064			Os01g0136200	1.23766	0.382453
Os01g0136400	ns	ns	ns	0.693822	ns	ns	ns	ns			Os01g0136400	0.693822	#DIV/0!
Os01g0136450	ns	ns	ns	ns	-1.12749	ns	ns	-1.15489			Os01g0136450	-1.14119	0.0193751
Os01g0136500	1.59201	ns	-4.94267	ns	4.55511	3.36136	ns	3.22566			Os01g0136500	1.5583	3.78404
Os01g0136600	-3.52432	ns	ns	ns	-4.69622	ns	ns	ns			Os01g0136600	-4.11027	0.828664
Os01g0136700	ns	ns	ns	1.52538	ns	ns	-1.76988	ns			Os01g0136700	-0.122252	2.3301
Os01g0137200	ns	ns	ns	0.828135	ns	ns	ns	1.10688			Os01g0137200	0.967509	0.197105
Os01g0137232	ns	ns	ns	2.91859	ns	ns	ns	ns			Os01g0137232	2.91859	#DIV/0!
Os01g0137250	ns	ns	ns	ns	-8.54012	ns	ns	-2.47071			Os01g0137250	-5.50541	4.29172
Os01g0137300	-6.7569	ns	0.719192	ns	-7.23089	ns	ns	ns			Os01g0137300	-4.42286	4.45945
Os01g0137400	ns	ns	ns	1.81622	ns	ns	ns	ns			Os01g0137400	1.81622	#DIV/0!
Os01g0137500	-6.5842	ns	ns	ns	-7.15441	ns	ns	ns			Os01g0137500	-6.86931	0.403204
Os01g0137550	-3.82804	ns	ns	-2.12829	-4.69375	ns	ns	-2.44077			Os01g0137550	-3.27271	1.20133
Os01g0137950	ns	ns	-1.26116	-1.59743	ns	ns	ns	-1.35069			Os01g0137950	-1.40309	0.174152
Os01g0138100	ns	ns	ns	-1.84431	ns	ns	ns	ns			Os01g0138100	-1.84431	#DIV/0!
Os01g0138300	ns	ns	-1.51307	-0.950486	ns	ns	-1.39246	-0.820846			Os01g0138300	-1.16922	0.335301
Os01g0138400	ns	ns	-1.50521	4.07841	ns	ns	-1.79356	3.39333			Os01g0138400	1.04324	3.12395
Os01g0138500	ns	ns	-1.20586	1.49383	-3.94681	ns	-4.68817	ns			Os01g0138500	-2.08675	2.81802
Os01g0138600	ns	-0.634485	ns	-1.0678	ns	ns	ns	-0.763596			Os01g0138600	-0.821961	0.222477
Os01g0138800	1.36577	4.59515	1.82047	3.1886	ns	ns	ns	ns			Os01g0138800	2.7425	1.45795
Os01g0138900	ns	ns	-1.49632	0.956397	ns	ns	-2.25411	ns			Os01g0138900	-0.931343	1.67816
Os01g0139200	0.851234	1.08777	0.949699	ns	0.605147	ns	0.705194	ns			Os01g0139200	0.839808	0.191623
Os01g0139600	ns	ns	ns	-4.24387	ns	ns	ns	-3.55379			Os01g0139600	-3.89883	0.487962
Os01g0139700	ns	2.63478	-2.32526	2.96149	-3.77998	ns	-6.1451	ns			Os01g0139700	-1.33081	4.00982
Os01g0139900	ns	ns	-1.06956	ns	ns	ns	-2.04689	ns			Os01g0139900	-1.55822	0.691078
Os01g0140100	ns	ns	ns	ns	1.2047	0.782374	0.809891	0.811353			Os01g0140100	0.90208	0.202188
Os01g0140400	ns	ns	-0.755523	-0.543143	ns	ns	ns	ns			Os01g0140400	-0.649333	0.150175
Os01g0140500	ns	ns	ns	-0.521882	0.768851	ns	ns	ns			Os01g0140500	0.123484	0.912686
Os01g0140700	-1.75939	-1.53939	-1.61695	ns	-1.67401	-1.39019	-1.50356	ns			Os01g0140700	-1.58058	0.131075
Os01g0141000	0.634782	ns	0.967163	ns	1.45068	ns	1.79284	ns			Os01g0141000	1.21137	0.512336
Os01g0141100	ns	ns	0.66044	0.455272	ns	ns	ns	ns			Os01g0141100	0.557856	0.145076
Os01g0141600	ns	ns	-1.11884	-2.42088	1.55448	ns	ns	ns			Os01g0141600	-0.661746	2.02672
Os01g0141700	ns	-1.07334	-0.998095	ns	ns	ns	ns	ns			Os01g0141700	-1.03572	0.0532074
Os01g0142100	0.841007	ns	1.10058	ns	1.21439	ns	1.47119	ns			Os01g0142100	1.15679	0.261432
Os01g0142200	-0.921213	-1.58926	-0.537106	-2.05147	ns	ns	ns	-1.22005			Os01g0142200	-1.26382	0.586029
Os01g0142300	ns	2.44969	ns	2.08262	-1.09151	ns	ns	1.20422			Os01g0142300	1.16125	1.59015
Os01g0142500	ns	1.22194	ns	1.55313	ns	ns	ns	ns			Os01g0142500	1.38753	0.23419
Os01g0142600	-0.997052	ns	-0.865894	ns	ns	ns	ns	0.879026			Os01g0142600	-0.327973	1.04735
Os01g0142800	ns	ns	-0.707286	ns	ns	ns	ns	0.581548			Os01g0142800	-0.0628694	0.911343
Os01g0143100	0.524979	ns	ns	ns	0.538521	ns	ns	ns			Os01g0143100	0.53175	0.0095761
Os01g0143300	-0.765328	-1.31223	-0.777129	-1.34361	ns	ns	ns	ns			Os01g0143300	-1.04957	0.321695
Os01g0143350	-1.09714	-2.12747	-1.20209	-1.49269	ns	ns	ns	ns			Os01g0143350	-1.47985	0.463033
Os01g0143400	3.66177	ns	ns	5.43918	3.54165	ns	ns	5.3875			Os01g0143400	4.50753	1.04731
Os01g0143800	1.24945	ns	1.05816	1.44468	0.866341	ns	ns	1.10815			Os01g0143800	1.14536	0.216371
Os01g0143900	2.37887	2.13302	1.72903	1.84969	1.43501	ns	ns	0.944331			Os01g0143900	1.74499	0.510045
Os01g0144000	ns	ns	-0.339816	0.818289	ns	ns	ns	ns			Os01g0144000	0.239237	0.818904
Os01g0144100	3.94201	ns	4.1133	2.5164	4.56699	ns	4.73995	3.17271			Os01g0144100	3.84189	0.850964
Os01g0144200	7.09648	ns	4.72676	6.14826	6.57658	ns	4.15961	5.6127			Os01g0144200	5.72007	1.11756
Os01g0144300	2.77363	ns	ns	1.75685	2.92321	ns	ns	2.00315			Os01g0144300	2.36421	0.571361
Os01g0144500	ns	ns	ns	ns	ns	ns	ns	2.59194			Os01g0144500	2.59194	#DIV/0!
Os01g0144600	ns	ns	-0.788908	-0.387977	ns	ns	-0.852924	ns			Os01g0144600	-0.676603	0.251999
Os01g0144700	ns	ns	-1.67153	-1.49793	ns	ns	-1.34757	-1.15755			Os01g0144700	-1.41864	0.218676
Os01g0144900	2.2465	ns	-2.9334	1.94526	2.20308	ns	-2.8853	1.93787			Os01g0144900	0.419003	2.58132
Os01g0145200	1.42897	ns	-4.55249	1.08724	1.65672	ns	-3.84809	1.32923			Os01g0145200	-0.48307	2.89373
Os01g0145600	2.8526	ns	-3.38205	2.57055	2.69212	ns	-3.21953	2.41735			Os01g0145600	0.655171	3.06803
Os01g0146200	ns	ns	-3.10207	-8.80722	ns	ns	-3.40054	-9.12167			Os01g0146200	-6.10787	3.30323
Os01g0147200	ns	ns	ns	0.718081	ns	ns	ns	ns			Os01g0147200	0.718081	#DIV/0!
Os01g0147250	ns	ns	-1.4408	ns	-1.13806	-1.09549	-2.07447	-0.749672			Os01g0147250	-1.2997	0.497628
Os01g0147300	ns	-1.00635	-1.40524	-0.597167	ns	ns	-1.31854	ns			Os01g0147300	-1.08182	0.365707
Os01g0147600	ns	ns	1.42079	ns	ns	ns	1.72887	ns			Os01g0147600	1.57483	0.217848
Os01g0147650	ns	ns	2.47577	ns	ns	ns	1.64916	ns			Os01g0147650	2.06246	0.584504
Os01g0147800	ns	ns	ns	ns	ns	ns	ns	-0.822273			Os01g0147800	-0.822273	#DIV/0!
Os01g0147900	ns	1.35657	1.47163	ns	ns	0.941247	1.10402	ns			Os01g0147900	1.21837	0.240216
Os01g0147950	ns	ns	1.20425	ns	ns	ns	0.911013	ns			Os01g0147950	1.05763	0.207346
Os01g0148000	ns	0.661582	ns	0.70322	ns	ns	ns	0.644629			Os01g0148000	0.66981	0.0301498
Os01g0148050	ns	0.628623	ns	0.540616	ns	ns	ns	ns			Os01g0148050	0.58462	0.0622304
Os01g0148100	ns	ns	ns	0.306948	ns	ns	ns	ns			Os01g0148100	0.306948	#DIV/0!
Os01g0148400	0.432841	ns	ns	0.593992	ns	ns	ns	ns			Os01g0148400	0.513416	0.113951
Os01g0148500	0.797418	ns	ns	0.567728	ns	ns	-0.596388	ns			Os01g0148500	0.256253	0.747286
Os01g0148700	ns	ns	ns	ns	ns	ns	ns	0.581862			Os01g0148700	0.581862	#DIV/0!
Os01g0149200	-6.03126	-3.99797	-3.31282	-4.92064	-6.59477	-4.54808	-3.88495	-5.44304			Os01g0149200	-4.84169	1.12803
Os01g0149350	-1.40249	ns	ns	ns	ns	ns	ns	ns			Os01g0149350	-1.40249	#DIV/0!
Os01g0149400	ns	-1.28275	-2.98569	ns	1.69241	ns	-0.884608	1.72217			Os01g0149400	-0.347694	2.03519
Os01g0149500	-1.90005	ns	ns	-3.1186	-1.27197	ns	ns	-2.46132			Os01g0149500	-2.18799	0.787983
Os01g0149600	-2.05315	-1.02852	-0.970071	-2.63717	-1.87096	-0.820895	-0.779259	-2.40512			Os01g0149600	-1.57064	0.755912
Os01g0149750	-0.453263	ns	-0.358113	ns	ns	ns	ns	ns			Os01g0149750	-0.405688	0.0672809
Os01g0149800	-0.664962	ns	1.30708	-1.47406	-0.726604	ns	1.22435	-1.48387			Os01g0149800	-0.30301	1.26503
Os01g0149900	0.554764	1.33998	ns	2.13721	ns	ns	ns	1.66263			Os01g0149900	1.42365	0.665393
Os01g0150000	ns	ns	ns	-0.39167	ns	ns	ns	ns			Os01g0150000	-0.39167	#DIV/0!
Os01g0150100	-0.422873	-0.604956	ns	-0.4548	ns	ns	ns	ns			Os01g0150100	-0.49421	0.0972285
Os01g0150200	0.645829	ns	ns	ns	ns	ns	ns	ns			Os01g0150200	0.645829	#DIV/0!
Os01g0150400	ns	ns	ns	ns	ns	ns	ns	-1.4961			Os01g0150400	-1.4961	#DIV/0!
Os01g0150700	ns	-4.89294	0.754402	-7.28702	ns	-5.30069	ns	-7.67449			Os01g0150700	-4.88015	3.37367
Os01g0150800	ns	ns	ns	-1.90385	ns	ns	ns	ns			Os01g0150800	-1.90385	#DIV/0!
Os01g0150950	-3.65699	ns	ns	ns	-5.6163	ns	ns	ns			Os01g0150950	-4.63664	1.38545
Os01g0151100	ns	ns	0.328765	0.661941	ns	ns	ns	ns			Os01g0151100	0.495353	0.235591
Os01g0151200	ns	ns	ns	0.974487	ns	ns	ns	0.686492			Os01g0151200	0.83049	0.203643
Os01g0151400	ns	ns	-1.61618	ns	ns	ns	ns	1.00098			Os01g0151400	-0.307596	1.85061
Os01g0151500	ns	-5.22153	-3.93777	-0.934745	ns	-3.93789	-2.65752	ns			Os01g0151500	-3.33789	1.62064
Os01g0151700	ns	-1.941	-1.10746	ns	ns	-1.09646	ns	1.19332			Os01g0151700	-0.7379	1.34688
Os01g0151900	-1.33305	-0.991068	-0.95913	-1.77214	ns	ns	ns	-0.971552			Os01g0151900	-1.20539	0.353114
Os01g0152000	-1.69243	-1.28498	-1.0304	-1.98818	-1.48317	ns	ns	-1.70243			Os01g0152000	-1.53026	0.339958
Os01g0152200	ns	7.55035	9.51774	ns	ns	7.46634	9.49401	ns			Os01g0152200	8.50711	1.15382
Os01g0152300	-2.64127	-0.933251	ns	-3.01338	-2.04024	ns	ns	-2.36829			Os01g0152300	-2.19929	0.792907
Os01g0152600	-0.771446	ns	ns	ns	-1.12794	ns	ns	ns			Os01g0152600	-0.949693	0.252079
Os01g0152800	ns	1.70256	0.646757	2.32208	ns	ns	ns	1.47355			Os01g0152800	1.53624	0.692898
Os01g0152900	-0.576208	-0.936616	-0.71403	-0.961179	ns	ns	ns	-0.671054			Os01g0152900	-0.771818	0.16939
Os01g0152950	0.448508	0.53408	0.558811	0.672557	ns	ns	ns	0.488426			Os01g0152950	0.540477	0.0851319
Os01g0153000	ns	ns	ns	-1.59668	ns	ns	ns	-1.63342			Os01g0153000	-1.61505	0.0259758
Os01g0153100	ns	-1.04932	-0.957184	-0.7785	ns	ns	-0.74059	ns			Os01g0153100	-0.881398	0.146465
Os01g0153150	ns	ns	-1.06041	ns	ns	ns	ns	ns			Os01g0153150	-1.06041	#DIV/0!
Os01g0153200	ns	ns	ns	-1.88553	ns	ns	ns	-1.87792			Os01g0153200	-1.88172	0.00538001
Os01g0153250	ns	ns	ns	-1.26398	ns	ns	ns	ns			Os01g0153250	-1.26398	#DIV/0!
Os01g0153300	-0.878272	-1.28658	-1.21205	-2.16477	ns	ns	ns	-1.63127			Os01g0153300	-1.43459	0.488047
Os01g0153400	-0.324948	ns	ns	ns	ns	ns	ns	ns			Os01g0153400	-0.324948	#DIV/0!
Os01g0153700	-0.686849	ns	-3.76571	ns	ns	ns	-3.75589	ns			Os01g0153700	-2.73615	1.77475
Os01g0153800	ns	ns	ns	1.56231	ns	ns	ns	ns			Os01g0153800	1.56231	#DIV/0!
Os01g0154600	ns	1.13268	1.20881	-1.83349	ns	ns	1.22233	-1.58349			Os01g0154600	0.0293708	1.58927
Os01g0154950	ns	ns	ns	1.7043	5.49479	ns	ns	5.98566			Os01g0154950	4.39491	2.34303
Os01g0155000	2.19519	4.76114	3.18099	4.76325	ns	1.97349	ns	2.23314			Os01g0155000	3.18453	1.29063
Os01g0155500	ns	1.51013	1.24884	ns	ns	ns	ns	ns			Os01g0155500	1.37949	0.18476
Os01g0155600	ns	-0.484221	ns	-0.537191	ns	ns	ns	ns			Os01g0155600	-0.510706	0.0374555
Os01g0156300	ns	ns	1.44319	2.14979	ns	ns	ns	ns			Os01g0156300	1.79649	0.499645
Os01g0157500	ns	ns	ns	2.0007	ns	ns	ns	ns			Os01g0157500	2.0007	#DIV/0!
Os01g0157600	ns	ns	ns	2.39801	ns	ns	ns	ns			Os01g0157600	2.39801	#DIV/0!
Os01g0157700	ns	ns	ns	2.42512	ns	ns	ns	3.42694			Os01g0157700	2.92603	0.708393
Os01g0157800	-0.799493	-1.07929	ns	-0.496971	ns	ns	ns	ns			Os01g0157800	-0.791918	0.291234
Os01g0157900	ns	ns	ns	1.31994	ns	ns	ns	ns			Os01g0157900	1.31994	#DIV/0!
Os01g0158100	ns	1.2291	ns	0.977437	ns	ns	ns	ns			Os01g0158100	1.10327	0.177955
Os01g0158200	1.51816	ns	-0.871389	1.77606	1.39898	ns	-0.981297	1.69947			Os01g0158200	0.756665	1.31084
Os01g0158400	ns	-1.54105	-1.32252	ns	ns	ns	ns	ns			Os01g0158400	-1.43179	0.154527
Os01g0158500	12.0415	ns	ns	12.1275	12.0235	ns	ns	12.1507			Os01g0158500	12.0858	0.0626812
Os01g0158533	3.31256	ns	ns	6.002	ns	ns	ns	6.0953			Os01g0158533	5.13662	1.58037
Os01g0158566	9.22737	ns	ns	7.97826	9.21888	ns	ns	8.01196			Os01g0158566	8.60912	0.709137
Os01g0158600	9.88371	ns	ns	9.11463	9.86382	ns	ns	9.13938			Os01g0158600	9.50039	0.431341
Os01g0159000	ns	-0.453759	0.67809	-2.50164	ns	-0.884157	ns	-2.91725			Os01g0159000	-1.21574	1.48541
Os01g0159200	2.5566	ns	2.61338	1.24215	ns	ns	1.77982	ns			Os01g0159200	2.04799	0.658187
Os01g0159250	3.93895	ns	3.33308	ns	ns	ns	ns	ns			Os01g0159250	3.63602	0.428411
Os01g0159300	-0.674261	ns	ns	1.07312	ns	ns	ns	ns			Os01g0159300	0.19943	1.23559
Os01g0159400	ns	-1.85046	-1.52549	-0.596438	ns	ns	ns	ns			Os01g0159400	-1.32413	0.65081
Os01g0159800	ns	ns	ns	1.89618	ns	ns	ns	ns			Os01g0159800	1.89618	#DIV/0!
Os01g0160100	ns	ns	0.634412	0.624856	ns	ns	ns	ns			Os01g0160100	0.629634	0.00675677
Os01g0160150	ns	ns	ns	1.0955	ns	ns	ns	1.14543			Os01g0160150	1.12046	0.0353036
Os01g0160700	-1.06807	ns	ns	ns	ns	ns	ns	ns			Os01g0160700	-1.06807	#DIV/0!
Os01g0161300	ns	ns	ns	-1.91111	ns	ns	ns	ns			Os01g0161300	-1.91111	#DIV/0!
Os01g0162001	ns	-1.13559	ns	-3.83086	ns	ns	ns	-2.83775			Os01g0162001	-2.6014	1.36309
Os01g0162200	4.79348	ns	ns	3.28893	4.67344	ns	ns	3.6397			Os01g0162200	4.09889	0.748208
Os01g0162400	ns	ns	ns	-1.78383	ns	ns	ns	ns			Os01g0162400	-1.78383	#DIV/0!
Os01g0162500	ns	-1.09417	-1.376	-2.80327	1.47716	ns	ns	ns			Os01g0162500	-0.94907	1.78213
Os01g0162701	9.87836	ns	ns	10.5026	9.85173	ns	ns	10.5304			Os01g0162701	10.1908	0.37646
Os01g0162800	ns	ns	ns	7.66128	ns	ns	ns	7.69614			Os01g0162800	7.67871	0.024655
Os01g0162900	0.672962	ns	ns	8.86899	8.89606	ns	ns	8.89939			Os01g0162900	6.83435	4.10762
Os01g0163000	4.02313	ns	ns	4.73877	4.00007	ns	ns	4.74559			Os01g0163000	4.37689	0.421911
Os01g0164300	7.58788	ns	ns	7.00855	4.18072	ns	ns	3.75825			Os01g0164300	5.63385	1.94401
Os01g0164400	ns	ns	-0.735663	0.330875	ns	ns	ns	0.634494			Os01g0164400	0.0765688	0.719609
Os01g0164500	ns	-1.0068	-0.562611	ns	ns	-0.6707	ns	ns			Os01g0164500	-0.746705	0.231644
Os01g0164600	1.06974	ns	1.06503	ns	ns	ns	0.788657	ns			Os01g0164600	0.974476	0.160941
Os01g0164700	ns	ns	-0.558212	ns	ns	ns	ns	ns			Os01g0164700	-0.558212	#DIV/0!
Os01g0164800	ns	-0.957491	-1.15872	-0.666176	ns	ns	-0.973193	ns			Os01g0164800	-0.938896	0.203489
Os01g0164900	ns	-1.27276	-1.28708	-0.768681	ns	ns	ns	ns			Os01g0164900	-1.10951	0.29525
Os01g0165000	ns	1.5152	ns	1.90983	ns	ns	-1.14148	ns			Os01g0165000	0.761184	1.65953
Os01g0165100	ns	7.96254	ns	9.28448	ns	ns	ns	1.98153			Os01g0165100	6.40952	3.89129
Os01g0165200	ns	ns	ns	-0.78063	ns	ns	ns	-1.27966			Os01g0165200	-1.03014	0.352866
Os01g0165600	1.76541	2.14547	1.97957	ns	ns	1.16004	1.05441	ns			Os01g0165600	1.62098	0.489389
Os01g0165800	-1.32717	-0.446069	ns	-0.988331	-1.16251	ns	ns	-0.785576			Os01g0165800	-0.941933	0.342618
Os01g0166100	ns	ns	ns	0.692671	ns	ns	ns	1.02386			Os01g0166100	0.858267	0.234187
Os01g0166200	-1.09808	ns	ns	-1.4331	ns	ns	ns	-1.2905			Os01g0166200	-1.27389	0.168123
Os01g0166300	-1.06029	ns	ns	-1.38551	-0.926414	ns	ns	-1.20432			Os01g0166300	-1.14413	0.196906
Os01g0166400	-1.37562	-0.943918	ns	-2.62725	ns	ns	ns	-2.06611			Os01g0166400	-1.75322	0.743725
Os01g0166500	ns	ns	ns	-0.97788	ns	ns	ns	ns			Os01g0166500	-0.97788	#DIV/0!
Os01g0166700	0.875342	-0.986629	ns	-0.81202	1.62355	ns	ns	ns			Os01g0166700	0.175061	1.27963
Os01g0166800	ns	-1.719	-1.51825	-2.21414	ns	ns	-0.981055	-1.64092			Os01g0166800	-1.61467	0.442071
Os01g0167100	-0.673036	ns	-0.697861	-2.33805	ns	ns	ns	-2.00964			Os01g0167100	-1.42965	0.86978
Os01g0167400	ns	1.56233	0.797231	2.17566	ns	ns	ns	1.37493			Os01g0167400	1.47754	0.568013
Os01g0167500	ns	ns	ns	1.11517	ns	ns	ns	ns			Os01g0167500	1.11517	#DIV/0!
Os01g0167600	ns	ns	ns	ns	ns	ns	-0.902604	ns			Os01g0167600	-0.902604	#DIV/0!
Os01g0167700	ns	-1.62691	-2.15624	-0.873257	ns	ns	-1.95746	-0.650013			Os01g0167700	-1.45278	0.663355
Os01g0167750	ns	ns	ns	-0.754003	ns	ns	ns	ns			Os01g0167750	-0.754003	#DIV/0!
Os01g0167800	ns	0.716541	ns	ns	ns	ns	ns	ns			Os01g0167800	0.716541	#DIV/0!
Os01g0167900	ns	ns	-1.38967	0.458217	ns	ns	-1.82716	ns			Os01g0167900	-0.919538	1.21306
Os01g0168100	-1.14704	ns	-2.17205	0.647661	-1.73656	ns	-2.8017	ns			Os01g0168100	-1.44194	1.31551
Os01g0168200	-0.980466	-1.74912	-1.30692	-2.02827	ns	ns	ns	-1.32681			Os01g0168200	-1.47832	0.411086
Os01g0168300	ns	ns	ns	ns	ns	ns	ns	0.537792			Os01g0168300	0.537792	#DIV/0!
Os01g0168350	ns	ns	ns	1.30137	ns	ns	ns	1.3626			Os01g0168350	1.33199	0.0432925
Os01g0168400	0.278124	ns	ns	0.467765	ns	ns	ns	ns			Os01g0168400	0.372945	0.134097
Os01g0168450	ns	ns	ns	-2.05955	ns	ns	ns	ns			Os01g0168450	-2.05955	#DIV/0!
Os01g0168500	ns	0.607473	ns	1.0023	ns	ns	ns	ns			Os01g0168500	0.804886	0.279183
Os01g0168600	ns	ns	ns	0.503505	ns	ns	ns	ns			Os01g0168600	0.503505	#DIV/0!
Os01g0168800	1.40428	ns	ns	2.02876	2.66982	ns	1.51222	3.33107			Os01g0168800	2.18923	0.811634
Os01g0169500	ns	ns	ns	-0.877734	ns	ns	ns	-0.686969			Os01g0169500	-0.782352	0.134892
Os01g0169800	-1.23246	ns	-1.25966	ns	-1.74643	ns	-1.76634	ns			Os01g0169800	-1.50122	0.294959
Os01g0169851	-0.829784	ns	-0.795913	ns	ns	ns	-1.23381	ns			Os01g0169851	-0.953169	0.243632
Os01g0169900	ns	ns	ns	0.703981	ns	ns	ns	ns			Os01g0169900	0.703981	#DIV/0!
Os01g0170000	ns	ns	-2.12228	3.33275	-2.78674	ns	-6.95158	ns			Os01g0170000	-2.13196	4.22377
Os01g0170051	ns	1.73262	-1.61724	3.64215	-2.38037	ns	-6.45501	ns			Os01g0170051	-1.01557	3.90702
Os01g0170100	ns	ns	ns	0.788223	ns	ns	ns	0.849589			Os01g0170100	0.818906	0.043392
Os01g0170500	-0.441388	0.862	ns	-1.11876	-0.985592	ns	ns	-1.5992			Os01g0170500	-0.656589	0.943768
Os01g0170600	-0.611726	ns	ns	-0.800291	ns	ns	ns	-0.647688			Os01g0170600	-0.686568	0.100114
Os01g0170700	ns	ns	ns	0.725552	ns	ns	ns	ns			Os01g0170700	0.725552	#DIV/0!
Os01g0170800	ns	ns	-0.498	ns	ns	ns	ns	ns			Os01g0170800	-0.498	#DIV/0!
Os01g0171200	ns	2.75547	ns	ns	ns	ns	ns	-2.1702			Os01g0171200	0.292636	3.48298
Os01g0171800	ns	-0.740839	-0.982176	-0.982895	ns	ns	-0.738066	-0.703359			Os01g0171800	-0.829467	0.14051
Os01g0172000	ns	ns	ns	-0.319297	ns	ns	ns	ns			Os01g0172000	-0.319297	#DIV/0!
Os01g0172100	ns	-2.64316	-3.68418	ns	ns	ns	-1.92925	ns			Os01g0172100	-2.7522	0.882532
Os01g0172300	ns	ns	ns	1.19537	ns	ns	ns	ns			Os01g0172300	1.19537	#DIV/0!
Os01g0172400	0.648062	ns	0.953722	ns	ns	ns	0.816729	ns			Os01g0172400	0.806171	0.153103
Os01g0172600	1.80224	ns	ns	2.19388	ns	ns	ns	1.82921			Os01g0172600	1.94177	0.218743
Os01g0172800	1.53548	ns	ns	ns	ns	ns	ns	ns			Os01g0172800	1.53548	#DIV/0!
Os01g0173000	ns	ns	ns	-1.17732	ns	ns	ns	-0.996755			Os01g0173000	-1.08704	0.127676
Os01g0173100	ns	-0.432512	ns	-0.439866	ns	ns	ns	ns			Os01g0173100	-0.436189	0.00519991
Os01g0173600	2.50817	-4.93229	-5.66045	ns	3.57555	-3.72913	-4.67378	1.24602			Os01g0173600	-1.66656	3.94345
Os01g0173900	ns	1.57456	ns	3.13368	-1.45011	ns	-1.69835	ns			Os01g0173900	0.389941	2.35784
Os01g0173950	ns	1.87266	ns	2.82823	ns	ns	-1.47426	ns			Os01g0173950	1.07554	2.25929
Os01g0174000	ns	ns	-0.838146	ns	ns	ns	ns	ns			Os01g0174000	-0.838146	#DIV/0!
Os01g0174100	0.757908	ns	1.77872	-1.93342	ns	ns	1.5457	ns			Os01g0174100	0.53723	1.70403
Os01g0174300	ns	-1.85771	-1.78665	-0.958829	ns	-1.21504	-1.16835	ns			Os01g0174300	-1.39732	0.400456
Os01g0174400	ns	ns	0.928542	ns	ns	ns	ns	ns			Os01g0174400	0.928542	#DIV/0!
Os01g0174500	ns	ns	ns	-0.922711	ns	ns	ns	ns			Os01g0174500	-0.922711	#DIV/0!
Os01g0174900	1.1828	0.80237	1.70097	0.756367	1.2751	ns	1.79152	0.877495			Os01g0174900	1.19809	0.421447
Os01g0175000	ns	-0.940744	-0.893075	-0.970025	ns	-0.735141	-0.70296	-0.750572			Os01g0175000	-0.832086	0.115991
Os01g0175100	ns	-0.757691	-0.797174	ns	ns	ns	ns	ns			Os01g0175100	-0.777432	0.027919
Os01g0175400	-1.13777	ns	0.807119	ns	-1.63572	ns	ns	ns			Os01g0175400	-0.655456	1.29087
Os01g0175500	-0.720767	ns	ns	ns	ns	ns	ns	ns			Os01g0175500	-0.720767	#DIV/0!
Os01g0175600	ns	ns	ns	ns	4.7589	ns	ns	ns			Os01g0175600	4.7589	#DIV/0!
Os01g0175700	ns	ns	ns	ns	ns	ns	-4.54983	ns			Os01g0175700	-4.54983	#DIV/0!
Os01g0175850	ns	3.26834	ns	2.89732	-4.04785	ns	-4.93737	ns			Os01g0175850	-0.704887	4.39134
Os01g0176050	ns	ns	ns	-0.754529	ns	ns	ns	ns			Os01g0176050	-0.754529	#DIV/0!
Os01g0176100	-1.02125	ns	ns	-2.39052	ns	ns	ns	-1.9262			Os01g0176100	-1.77933	0.696353
Os01g0176200	ns	ns	-1.54593	ns	ns	ns	-1.69058	ns			Os01g0176200	-1.61826	0.102278
Os01g0176300	ns	ns	ns	-1.70327	ns	ns	ns	-1.46646			Os01g0176300	-1.58487	0.167449
Os01g0176500	ns	-2.76381	-2.07241	-2.65941	ns	ns	ns	ns			Os01g0176500	-2.49854	0.372718
Os01g0176700	0.436798	ns	ns	0.930205	ns	ns	ns	ns			Os01g0176700	0.683501	0.348892
Os01g0176751	ns	ns	ns	0.872403	ns	ns	ns	ns			Os01g0176751	0.872403	#DIV/0!
Os01g0176800	ns	-1.56819	-1.31402	-2.478	ns	ns	ns	-1.84671			Os01g0176800	-1.80173	0.500587
Os01g0177100	ns	ns	ns	-1.37784	ns	ns	ns	-1.43718			Os01g0177100	-1.40751	0.0419635
Os01g0177150	ns	0.737734	ns	-1.0813	ns	ns	ns	-1.05052			Os01g0177150	-0.464696	1.04145
Os01g0177200	ns	ns	ns	ns	ns	ns	ns	0.451401			Os01g0177200	0.451401	#DIV/0!
Os01g0177400	-0.848832	ns	ns	-3.26807	ns	ns	ns	-3.05853			Os01g0177400	-2.39181	1.34036
Os01g0177500	ns	ns	ns	-3.29881	-1.25381	ns	ns	-3.56014			Os01g0177500	-2.70426	1.2629
Os01g0177900	-0.380029	-1.04861	-0.949218	-1.09984	ns	ns	ns	-0.533999			Os01g0177900	-0.802338	0.324453
Os01g0178000	ns	0.714734	0.739548	0.557921	ns	0.692515	0.751669	ns			Os01g0178000	0.691277	0.077963
Os01g0178100	-0.474816	-0.608334	ns	ns	ns	ns	ns	ns			Os01g0178100	-0.541575	0.0944115
Os01g0178200	-0.48841	ns	ns	0.407727	ns	ns	ns	0.578497			Os01g0178200	0.165938	0.573079
Os01g0178300	ns	ns	1.09436	ns	ns	ns	1.4789	ns			Os01g0178300	1.28663	0.271909
Os01g0178400	ns	0.666177	0.521193	0.453664	ns	ns	ns	ns			Os01g0178400	0.547011	0.108584
Os01g0178500	0.603053	0.874328	1.13066	0.718426	ns	ns	0.640265	ns			Os01g0178500	0.793346	0.215404
Os01g0178700	ns	2.25695	ns	1.2788	ns	ns	-1.88756	ns			Os01g0178700	0.549395	2.16639
Os01g0178775	ns	ns	ns	1.74784	ns	ns	ns	ns			Os01g0178775	1.74784	#DIV/0!
Os01g0178850	ns	2.22781	3.27389	2.45769	ns	2.05168	3.14735	2.33654			Os01g0178850	2.58249	0.506108
Os01g0178900	ns	ns	ns	-0.572847	ns	ns	ns	ns			Os01g0178900	-0.572847	#DIV/0!
Os01g0179000	ns	ns	-1.99928	2.53279	ns	ns	-3.51704	ns			Os01g0179000	-0.994508	3.14758
Os01g0179200	ns	ns	ns	1.32254	ns	ns	ns	ns			Os01g0179200	1.32254	#DIV/0!
Os01g0179300	ns	ns	ns	0.368752	ns	ns	ns	ns			Os01g0179300	0.368752	#DIV/0!
Os01g0179500	ns	0.639872	ns	1.92851	ns	ns	ns	ns			Os01g0179500	1.28419	0.911205
Os01g0179600	ns	1.12086	1.10918	ns	ns	ns	ns	-0.496248			Os01g0179600	0.577929	0.930284
Os01g0179700	ns	ns	ns	0.488499	ns	ns	ns	ns			Os01g0179700	0.488499	#DIV/0!
Os01g0179800	ns	-0.912201	-1.69882	ns	ns	ns	-1.52328	ns			Os01g0179800	-1.3781	0.412917
Os01g0179901	1.36158	ns	ns	ns	ns	ns	ns	ns			Os01g0179901	1.36158	#DIV/0!
Os01g0180000	ns	ns	-0.625096	1.08492	ns	ns	-0.949225	ns			Os01g0180000	-0.163133	1.09293
Os01g0180300	ns	1.09931	ns	ns	ns	ns	ns	ns			Os01g0180300	1.09931	#DIV/0!
Os01g0180400	ns	ns	ns	ns	-0.978654	ns	-0.752463	-0.788454			Os01g0180400	-0.839857	0.121541
Os01g0180600	ns	-1.27417	ns	-1.43856	ns	ns	ns	ns			Os01g0180600	-1.35637	0.116241
Os01g0180700	ns	-0.932411	-0.945979	-0.581263	ns	ns	ns	ns			Os01g0180700	-0.819885	0.206764
Os01g0180900	ns	ns	ns	ns	ns	ns	ns	5.30512			Os01g0180900	5.30512	#DIV/0!
Os01g0181000	ns	ns	ns	0.909165	ns	ns	ns	1.13765			Os01g0181000	1.02341	0.161562
Os01g0181300	ns	-0.703512	ns	-0.957822	ns	ns	ns	ns			Os01g0181300	-0.830667	0.179824
Os01g0182100	ns	2.42836	ns	3.61746	ns	3.77874	2.45719	4.85179			Os01g0182100	3.42671	1.01585
Os01g0182300	1.06242	ns	0.693076	0.664058	ns	ns	ns	ns			Os01g0182300	0.806518	0.222092
Os01g0182400	ns	-0.799493	-0.947777	ns	ns	ns	-0.896043	ns			Os01g0182400	-0.881104	0.0752622
Os01g0182500	0.546505	1.20051	ns	1.32715	ns	ns	ns	ns			Os01g0182500	1.02472	0.418963
Os01g0182600	0.739328	1.01946	1.1647	1.32066	ns	ns	ns	ns			Os01g0182600	1.06103	0.247234
Os01g0182700	-1.04757	-2.12883	-0.928056	-1.97405	ns	ns	ns	ns			Os01g0182700	-1.51962	0.619254
Os01g0182900	ns	ns	ns	-0.484938	ns	ns	ns	ns			Os01g0182900	-0.484938	#DIV/0!
Os01g0183000	ns	ns	ns	0.837246	-0.625482	ns	-0.701389	ns			Os01g0183000	-0.163208	0.86725
Os01g0183100	-0.553154	-0.649529	ns	-0.465854	ns	ns	ns	ns			Os01g0183100	-0.556179	0.0918747
Os01g0183300	ns	ns	ns	1.77115	ns	ns	-1.96632	ns			Os01g0183300	-0.0975831	2.64279
Os01g0183400	ns	-1.48279	-1.04025	-1.07567	ns	ns	ns	ns			Os01g0183400	-1.19957	0.245916
Os01g0183500	ns	ns	-1.21967	-1.88764	ns	ns	ns	ns			Os01g0183500	-1.55365	0.472324
Os01g0183600	8.21568	ns	ns	ns	4.77065	ns	ns	ns			Os01g0183600	6.49317	2.436
Os01g0183633	ns	-0.529988	ns	ns	ns	ns	ns	ns			Os01g0183633	-0.529988	#DIV/0!
Os01g0183800	0.354709	ns	0.489335	-0.356755	ns	ns	ns	ns			Os01g0183800	0.16243	0.454638
Os01g0183850	ns	3.34934	0.968414	2.51323	-4.1447	ns	-3.22339	ns			Os01g0183850	-0.107421	3.39055
Os01g0183950	ns	1.53223	1.96643	ns	ns	ns	ns	-2.36665			Os01g0183950	0.377337	2.38626
Os01g0184000	-0.445337	ns	ns	-1.40369	ns	ns	ns	-1.05552			Os01g0184000	-0.968182	0.485109
Os01g0184050	ns	ns	ns	1.03059	ns	ns	ns	ns			Os01g0184050	1.03059	#DIV/0!
Os01g0184500	ns	ns	ns	-0.289039	ns	ns	ns	ns			Os01g0184500	-0.289039	#DIV/0!
Os01g0184800	ns	ns	ns	0.503959	ns	ns	ns	0.482537			Os01g0184800	0.493248	0.0151477
Os01g0184900	-0.282148	ns	ns	ns	-0.414795	ns	ns	ns			Os01g0184900	-0.348471	0.0937956
Os01g0185200	ns	ns	0.721998	-0.797346	ns	ns	ns	-0.877784			Os01g0185200	-0.31771	0.901312
Os01g0185250	ns	ns	ns	2.24216	-1.8047	ns	-1.53879	ns			Os01g0185250	-0.367108	2.2636
Os01g0185300	ns	ns	-0.522075	1.92962	ns	ns	ns	1.25218			Os01g0185300	0.886575	1.26608
Os01g0185350	ns	2.73039	ns	3.26837	-1.85428	ns	ns	ns			Os01g0185350	1.38149	2.81514
Os01g0185400	ns	1.49352	0.634868	1.20278	-0.956597	ns	ns	ns			Os01g0185400	0.593642	1.09328
Os01g0185500	ns	ns	ns	-2.25185	ns	ns	ns	-1.83658			Os01g0185500	-2.04422	0.293645
Os01g0185900	ns	0.89409	0.624573	0.559498	ns	ns	ns	ns			Os01g0185900	0.69272	0.1774
Os01g0186000	ns	3.14563	ns	3.35778	ns	ns	ns	ns			Os01g0186000	3.25171	0.15001
Os01g0186200	0.981303	0.863459	1.1956	-0.573606	ns	ns	ns	-1.35473			Os01g0186200	0.222406	1.12416
Os01g0186400	ns	ns	2.38648	-1.78002	ns	ns	ns	-2.76102			Os01g0186400	-0.718185	2.7331
Os01g0186700	-0.516557	ns	ns	1.00423	-1.57927	ns	-1.2948	ns			Os01g0186700	-0.596601	1.1579
Os01g0186900	0.865458	4.21911	0.993174	4.27621	-3.63153	ns	-3.19256	ns			Os01g0186900	0.58831	3.43878
Os01g0187000	-0.62804	ns	0.692491	0.84829	ns	ns	ns	0.942323			Os01g0187000	0.463766	0.735126
Os01g0187300	-1.45696	ns	-1.22908	-0.706414	-0.93769	ns	ns	ns			Os01g0187300	-1.08253	0.328691
Os01g0187400	ns	ns	ns	0.328521	ns	ns	ns	ns			Os01g0187400	0.328521	#DIV/0!
Os01g0187500	0.616607	ns	ns	1.25483	ns	ns	ns	0.781795			Os01g0187500	0.88441	0.331254
Os01g0187600	ns	ns	ns	1.16743	ns	ns	ns	1.08198			Os01g0187600	1.12471	0.0604209
Os01g0187900	ns	ns	ns	0.406731	ns	ns	ns	ns			Os01g0187900	0.406731	#DIV/0!
Os01g0188100	ns	0.809773	0.36811	0.64079	ns	ns	ns	ns			Os01g0188100	0.606225	0.222851
Os01g0188400	ns	1.36385	0.929523	0.666943	-0.941893	ns	ns	ns			Os01g0188400	0.504606	1.00624
Os01g0188525	ns	2.02417	ns	1.30682	-1.68311	ns	ns	ns			Os01g0188525	0.549296	1.96631
Os01g0188900	-8.05219	-2.31723	-5.30124	-6.86548	-7.75546	-1.96825	-5.02951	-6.56344			Os01g0188900	-5.4816	2.31324
Os01g0189100	-7.41404	ns	-3.32663	-4.43823	-7.05646	ns	-3.00671	-4.11605			Os01g0189100	-4.89302	1.88988
Os01g0189800	-1.41338	-1.32214	-1.38546	-0.746402	-1.15205	-1.00579	-1.12127	ns			Os01g0189800	-1.16378	0.237216
Os01g0190000	ns	ns	ns	ns	1.83436	ns	ns	ns			Os01g0190000	1.83436	#DIV/0!
Os01g0190300	-0.721089	ns	ns	0.529107	-1.72323	ns	-1.33354	ns			Os01g0190300	-0.812188	0.984747
Os01g0190400	ns	ns	ns	-1.91922	ns	ns	ns	-1.19737			Os01g0190400	-1.55829	0.510426
Os01g0190500	ns	-1.19053	-0.492555	-1.61702	ns	ns	ns	ns			Os01g0190500	-1.10004	0.56767
Os01g0191000	ns	ns	ns	-0.938473	ns	ns	ns	ns			Os01g0191000	-0.938473	#DIV/0!
Os01g0191100	-0.49062	-1.18779	-0.718306	-1.2282	ns	ns	ns	ns			Os01g0191100	-0.906228	0.36101
Os01g0191300	ns	ns	ns	0.512803	ns	ns	ns	ns			Os01g0191300	0.512803	#DIV/0!
Os01g0191400	ns	ns	ns	-2.09051	ns	ns	ns	-1.57221			Os01g0191400	-1.83136	0.36649
Os01g0191700	ns	ns	ns	0.929105	ns	ns	-0.601233	ns			Os01g0191700	0.163936	1.08211
Os01g0191800	ns	-1.66482	-1.65419	-2.10824	ns	ns	ns	-1.24232			Os01g0191800	-1.66739	0.353655
Os01g0192000	1.69003	1.41242	1.98516	ns	ns	ns	ns	ns			Os01g0192000	1.69587	0.286411
Os01g0192300	ns	ns	ns	1.22486	ns	ns	ns	ns			Os01g0192300	1.22486	#DIV/0!
Os01g0192500	ns	ns	0.917521	-1.01583	ns	ns	1.25932	ns			Os01g0192500	0.387003	1.22685
Os01g0192600	ns	ns	ns	0.611118	ns	ns	ns	ns			Os01g0192600	0.611118	#DIV/0!
Os01g0193500	ns	ns	ns	1.53846	ns	ns	ns	ns			Os01g0193500	1.53846	#DIV/0!
Os01g0193900	ns	ns	ns	0.60447	-0.727392	ns	ns	ns			Os01g0193900	-0.0614612	0.941769
Os01g0194000	0.71133	2.97008	ns	2.2222	ns	ns	-2.2236	ns			Os01g0194000	0.920004	2.29669
Os01g0194200	-0.380163	ns	-0.972677	-1.315	ns	ns	-0.755314	-1.06416			Os01g0194200	-0.897464	0.351991
Os01g0194300	0.651	ns	ns	1.10394	ns	ns	ns	ns			Os01g0194300	0.877471	0.320278
Os01g0194600	0.964754	ns	0.749489	-1.91822	ns	ns	ns	-2.31481			Os01g0194600	-0.629697	1.72669
Os01g0195000	ns	ns	0.671085	2.04311	-1.48485	ns	ns	ns			Os01g0195000	0.409781	1.77844
Os01g0195100	ns	ns	ns	2.36284	ns	ns	ns	ns			Os01g0195100	2.36284	#DIV/0!
Os01g0195200	ns	ns	ns	-0.251284	ns	ns	ns	ns			Os01g0195200	-0.251284	#DIV/0!
Os01g0195300	ns	ns	ns	2.2348	-2.32345	ns	-2.61568	ns			Os01g0195300	-0.901444	2.72
Os01g0195500	ns	ns	ns	-0.704311	ns	ns	ns	ns			Os01g0195500	-0.704311	#DIV/0!
Os01g0195700	ns	ns	ns	1.83242	ns	ns	ns	ns			Os01g0195700	1.83242	#DIV/0!
Os01g0195801	ns	ns	ns	2.74037	ns	ns	-2.13751	ns			Os01g0195801	0.301428	3.44918
Os01g0196300	ns	ns	-1.70284	ns	-1.1872	ns	-2.50497	ns			Os01g0196300	-1.79833	0.664055
Os01g0196500	ns	ns	ns	0.670071	ns	ns	ns	ns			Os01g0196500	0.670071	#DIV/0!
Os01g0196600	ns	ns	ns	ns	ns	ns	ns	0.331888			Os01g0196600	0.331888	#DIV/0!
Os01g0196800	ns	ns	1.51163	ns	ns	ns	ns	ns			Os01g0196800	1.51163	#DIV/0!
Os01g0197100	0.696285	ns	ns	0.762346	ns	ns	ns	ns			Os01g0197100	0.729315	0.0467125
Os01g0197150	ns	ns	ns	1.42703	ns	ns	ns	ns			Os01g0197150	1.42703	#DIV/0!
Os01g0197200	-0.229701	ns	ns	-0.232158	ns	ns	ns	ns			Os01g0197200	-0.230929	0.00173712
Os01g0197400	ns	ns	ns	ns	ns	ns	ns	-0.433752			Os01g0197400	-0.433752	#DIV/0!
Os01g0197700	ns	ns	ns	3.62071	ns	ns	ns	1.99526			Os01g0197700	2.80798	1.14937
Os01g0197900	1.02456	ns	ns	1.24048	ns	ns	-1.3877	ns			Os01g0197900	0.292446	1.45905
Os01g0198000	ns	-0.854053	ns	0.405038	-0.724743	-1.2929	-0.777653	ns			Os01g0198000	-0.648862	0.630464
Os01g0198100	ns	ns	ns	0.49565	-0.763554	-1.10748	-0.896116	ns			Os01g0198100	-0.567875	0.723024
Os01g0198200	-0.293885	ns	ns	-0.247927	ns	ns	ns	ns			Os01g0198200	-0.270906	0.0324972
Os01g0198500	ns	1.84157	ns	1.08339	-1.41225	ns	ns	ns			Os01g0198500	0.504237	1.70247
Os01g0198702	ns	ns	ns	0.861591	ns	ns	ns	ns			Os01g0198702	0.861591	#DIV/0!
Os01g0198900	1.51909	ns	ns	ns	1.32321	ns	ns	ns			Os01g0198900	1.42115	0.138502
Os01g0199300	ns	ns	ns	3.28733	ns	ns	-6.22366	ns			Os01g0199300	-1.46817	6.72529
Os01g0199400	ns	ns	-0.622177	ns	ns	ns	-1.38829	ns			Os01g0199400	-1.00523	0.541723
Os01g0199700	ns	ns	1.34116	ns	ns	ns	ns	ns			Os01g0199700	1.34116	#DIV/0!
Os01g0199900	-0.513618	-0.655789	-0.679497	-0.966782	ns	ns	ns	ns			Os01g0199900	-0.703922	0.189934
Os01g0200000	ns	ns	ns	ns	ns	ns	ns	0.529515			Os01g0200000	0.529515	#DIV/0!
Os01g0200400	ns	-0.745903	-0.633732	-1.25337	ns	ns	ns	ns			Os01g0200400	-0.877668	0.330166
Os01g0200500	ns	ns	ns	-0.300972	ns	ns	ns	ns			Os01g0200500	-0.300972	#DIV/0!
Os01g0200600	ns	ns	-1.24741	ns	ns	ns	ns	ns			Os01g0200600	-1.24741	#DIV/0!
Os01g0200700	ns	ns	ns	-1.19788	ns	ns	ns	-0.911064			Os01g0200700	-1.05447	0.20281
Os01g0200950	ns	ns	ns	-0.381319	ns	ns	ns	ns			Os01g0200950	-0.381319	#DIV/0!
Os01g0201000	-0.656915	ns	-0.765127	-0.81869	ns	ns	ns	ns			Os01g0201000	-0.746911	0.0824114
Os01g0201100	ns	ns	-2.06079	2.71437	ns	ns	-3.71494	ns			Os01g0201100	-1.02045	3.33852
Os01g0201200	ns	ns	ns	0.764612	ns	ns	ns	ns			Os01g0201200	0.764612	#DIV/0!
Os01g0201250	ns	ns	-1.50584	-1.40082	ns	ns	ns	ns			Os01g0201250	-1.45333	0.0742593
Os01g0201275	-0.955274	ns	-1.83785	-0.908112	ns	ns	ns	ns			Os01g0201275	-1.23374	0.523698
Os01g0201400	ns	ns	-3.87259	-4.98788	ns	ns	ns	ns			Os01g0201400	-4.43023	0.788631
Os01g0201500	ns	9.52006	ns	ns	ns	9.44556	ns	ns			Os01g0201500	9.48281	0.0526826
Os01g0201600	-0.608658	ns	ns	ns	ns	ns	ns	0.797202			Os01g0201600	0.094272	0.994093
Os01g0201800	ns	ns	-1.87311	-1.69175	2.64497	1.61412	ns	0.970836			Os01g0201800	0.333014	2.02236
Os01g0201850	ns	ns	-1.33196	-1.2167	ns	ns	ns	ns			Os01g0201850	-1.27433	0.0815031
Os01g0202500	1.80324	1.1876	1.21966	ns	2.57673	1.96607	1.99639	0.993074			Os01g0202500	1.67754	0.56678
Os01g0202700	ns	ns	ns	-1.66422	ns	ns	ns	ns			Os01g0202700	-1.66422	#DIV/0!
Os01g0202800	ns	ns	ns	2.28668	ns	ns	ns	ns			Os01g0202800	2.28668	#DIV/0!
Os01g0203000	0.447627	0.856229	0.380981	0.812641	ns	ns	ns	ns			Os01g0203000	0.624369	0.244732
Os01g0203300	-0.69065	ns	ns	ns	ns	ns	ns	ns			Os01g0203300	-0.69065	#DIV/0!
Os01g0203800	ns	ns	-0.455598	1.06702	-1.38917	ns	-1.56455	ns			Os01g0203800	-0.585576	1.20445
Os01g0204000	-0.724607	-1.01939	ns	-1.02313	ns	ns	ns	ns			Os01g0204000	-0.922376	0.171284
Os01g0205100	-0.498534	-0.5055	ns	-0.976639	ns	ns	ns	-0.668984			Os01g0205100	-0.662415	0.2238
Os01g0205200	ns	ns	ns	ns	0.85092	ns	ns	ns			Os01g0205200	0.85092	#DIV/0!
Os01g0205500	-0.474437	-1.24513	-0.635429	-1.2502	ns	ns	ns	ns			Os01g0205500	-0.901299	0.405318
Os01g0205600	ns	1.04419	ns	1.27057	ns	ns	ns	ns			Os01g0205600	1.15738	0.160073
Os01g0205700	ns	0.372405	0.417336	-0.454935	-0.542725	ns	ns	-0.917017			Os01g0205700	-0.224987	0.592071
Os01g0205800	ns	0.714855	0.529726	-0.370842	ns	ns	ns	-0.662923			Os01g0205800	0.0527041	0.672683
Os01g0205900	ns	ns	ns	-2.6637	ns	ns	ns	-2.89161			Os01g0205900	-2.77765	0.161156
Os01g0206200	ns	ns	ns	-0.522375	ns	ns	ns	-0.43552			Os01g0206200	-0.478948	0.061416
Os01g0206300	1.30395	ns	ns	ns	ns	ns	ns	ns			Os01g0206300	1.30395	#DIV/0!
Os01g0206600	ns	ns	ns	-1.71546	ns	ns	ns	-1.24699			Os01g0206600	-1.48122	0.331255
Os01g0206700	ns	ns	ns	ns	ns	-1.38436	ns	ns			Os01g0206700	-1.38436	#DIV/0!
Os01g0206800	ns	-0.77384	-1.4421	-1.20584	ns	ns	ns	ns			Os01g0206800	-1.14059	0.338873
Os01g0207200	0.387694	ns	-0.750602	ns	ns	ns	-0.940253	ns			Os01g0207200	-0.434387	0.718231
Os01g0207400	0.868466	1.09363	1.13886	ns	ns	0.808951	0.878455	ns			Os01g0207400	0.957672	0.148041
Os01g0207500	ns	1.35746	1.93618	1.52587	ns	ns	ns	ns			Os01g0207500	1.6065	0.29767
Os01g0207700	ns	ns	3.04587	ns	ns	ns	2.88876	ns			Os01g0207700	2.96731	0.111091
Os01g0207900	1.55994	ns	2.67535	2.87124	ns	ns	2.72799	2.94534			Os01g0207900	2.55597	0.567212
Os01g0208000	ns	ns	3.52453	ns	ns	ns	3.53635	ns			Os01g0208000	3.53044	0.00835505
Os01g0208400	ns	ns	ns	ns	2.50426	ns	ns	2.03648			Os01g0208400	2.27037	0.330769
Os01g0208600	ns	ns	ns	0.526065	ns	ns	ns	0.581677			Os01g0208600	0.553871	0.0393234
Os01g0208700	-4.22956	-0.80996	-2.37033	-2.75965	-5.18265	-1.75191	-3.31925	-3.66729			Os01g0208700	-3.01132	1.39541
Os01g0208800	ns	ns	ns	ns	ns	ns	-6.11743	-6.55217			Os01g0208800	-6.3348	0.307413
Os01g0209000	ns	ns	-0.305192	-0.522464	ns	ns	ns	ns			Os01g0209000	-0.413828	0.153634
Os01g0209200	-0.572217	ns	ns	-0.367896	-0.990663	ns	ns	-0.740709			Os01g0209200	-0.667871	0.263714
Os01g0209400	-0.530784	ns	-0.488237	0.570501	-0.754176	ns	-0.703575	ns			Os01g0209400	-0.381254	0.543738
Os01g0209700	ns	ns	-1.79697	ns	ns	ns	-1.4362	ns			Os01g0209700	-1.61658	0.255102
Os01g0209750	ns	ns	-1.26992	ns	ns	ns	-1.38948	ns			Os01g0209750	-1.3297	0.0845427
Os01g0209800	ns	ns	-0.702204	ns	ns	ns	-0.967709	ns			Os01g0209800	-0.834957	0.18774
Os01g0209901	ns	ns	ns	1.10323	ns	ns	ns	ns			Os01g0209901	1.10323	#DIV/0!
Os01g0210400	ns	ns	2.32549	ns	ns	ns	2.25101	ns			Os01g0210400	2.28825	0.052664
Os01g0210500	ns	ns	ns	-2.13212	0.994541	ns	ns	-1.25297			Os01g0210500	-0.796848	1.61246
Os01g0210550	ns	ns	1.03696	ns	1.27416	ns	1.69844	ns			Os01g0210550	1.33652	0.335124
Os01g0210600	-0.555341	-0.761381	-0.657896	-0.52234	-0.753309	-0.938304	-0.842235	-0.674077			Os01g0210600	-0.71311	0.139994
Os01g0210700	ns	ns	1.40883	ns	ns	ns	1.39536	ns			Os01g0210700	1.4021	0.00952681
Os01g0210800	ns	ns	ns	0.353842	-0.736131	ns	-0.709772	ns			Os01g0210800	-0.36402	0.621827
Os01g0210900	ns	ns	-1.01213	ns	ns	ns	-1.27652	ns			Os01g0210900	-1.14433	0.186956
Os01g0211200	ns	-1.19673	-1.16074	-0.764391	ns	-0.886851	-0.856103	ns			Os01g0211200	-0.972963	0.193588
Os01g0211600	ns	ns	ns	-1.24574	1.58876	ns	ns	ns			Os01g0211600	0.171511	2.0043
Os01g0211800	ns	ns	-0.419336	-1.83732	ns	ns	ns	-1.47034			Os01g0211800	-1.24233	0.735975
Os01g0212000	ns	ns	-0.51252	ns	ns	ns	ns	ns			Os01g0212000	-0.51252	#DIV/0!
Os01g0212100	-0.563157	ns	ns	-1.48548	ns	ns	ns	-1.2059			Os01g0212100	-1.08485	0.472928
Os01g0212400	ns	ns	ns	-1.53753	ns	ns	ns	-1.07013			Os01g0212400	-1.30383	0.330507
Os01g0212700	ns	1.94384	0.595377	1.88393	ns	ns	ns	ns			Os01g0212700	1.47438	0.76183
Os01g0212900	ns	ns	1.89933	-2.33491	ns	ns	ns	-2.95862			Os01g0212900	-1.1314	2.64315
Os01g0213100	ns	ns	2.22881	ns	ns	ns	ns	ns			Os01g0213100	2.22881	#DIV/0!
Os01g0213350	ns	ns	3.26301	ns	ns	ns	ns	ns			Os01g0213350	3.26301	#DIV/0!
Os01g0213400	ns	1.46007	2.32768	ns	ns	ns	1.25635	-1.10665			Os01g0213400	0.984362	1.46937
Os01g0213800	ns	ns	ns	0.736305	ns	ns	ns	ns			Os01g0213800	0.736305	#DIV/0!
Os01g0214001	-1.65867	ns	ns	ns	-2.11869	ns	ns	ns			Os01g0214001	-1.88868	0.325284
Os01g0214200	ns	ns	0.583438	-0.855849	ns	ns	0.785604	-0.594072			Os01g0214200	-0.0202197	0.824891
Os01g0214300	ns	ns	ns	0.746535	ns	ns	ns	ns			Os01g0214300	0.746535	#DIV/0!
Os01g0214400	ns	ns	ns	-0.458142	ns	ns	ns	-0.481966			Os01g0214400	-0.470054	0.0168459
Os01g0214500	ns	2.71536	1.05825	4.41337	-1.46461	ns	ns	1.68762			Os01g0214500	1.682	2.16901
Os01g0214600	0.855463	0.706722	1.54629	1.32278	1.59859	1.41794	2.30656	2.11436			Os01g0214600	1.48359	0.550395
Os01g0214800	ns	ns	ns	1.54659	ns	ns	ns	1.76826			Os01g0214800	1.65743	0.156744
Os01g0214901	ns	ns	ns	1.74331	ns	ns	ns	ns			Os01g0214901	1.74331	#DIV/0!
Os01g0215000	1.33493	ns	-8.36656	ns	10.3221	7.64449	ns	8.56656			Os01g0215000	3.9003	7.64999
Os01g0215500	ns	-2.05014	-1.17707	-2.18031	ns	ns	ns	-1.12579			Os01g0215500	-1.63333	0.55937
Os01g0215700	ns	ns	ns	-1.17291	ns	ns	ns	-0.900379			Os01g0215700	-1.03665	0.19271
Os01g0215725	ns	ns	ns	-0.92381	ns	ns	ns	-1.47689			Os01g0215725	-1.20035	0.391086
Os01g0216000	ns	ns	2.14669	ns	ns	ns	2.49978	1.22127			Os01g0216000	1.95591	0.660263
Os01g0216150	ns	ns	ns	2.07531	ns	ns	ns	ns			Os01g0216150	2.07531	#DIV/0!
Os01g0216400	ns	ns	ns	1.47724	ns	ns	ns	2.06592			Os01g0216400	1.77158	0.416258
Os01g0216500	ns	ns	ns	ns	3.29922	ns	ns	ns			Os01g0216500	3.29922	#DIV/0!
Os01g0216900	ns	ns	7.03543	6.41556	ns	ns	4.16762	3.77468			Os01g0216900	5.34832	1.61821
Os01g0217000	0.480845	ns	-0.743503	ns	0.871427	ns	ns	ns			Os01g0217000	0.202923	0.842573
Os01g0217100	ns	ns	1.29971	ns	ns	ns	1.15447	ns			Os01g0217100	1.22709	0.102703
Os01g0217500	1.09419	-0.811888	-1.01198	ns	2.04799	ns	ns	0.596909			Os01g0217500	0.383044	1.29397
Os01g0217800	1.44423	0.603596	1.17754	1.2083	1.12103	ns	0.85823	0.922365			Os01g0217800	1.0479	0.275105
Os01g0218100	ns	ns	ns	2.07947	ns	ns	ns	1.9622			Os01g0218100	2.02083	0.08292
Os01g0218200	ns	ns	ns	-0.402909	ns	ns	ns	ns			Os01g0218200	-0.402909	#DIV/0!
Os01g0218350	-2.04748	ns	ns	ns	ns	ns	ns	ns			Os01g0218350	-2.04748	#DIV/0!
Os01g0218500	-6.08324	ns	ns	ns	ns	ns	ns	ns			Os01g0218500	-6.08324	#DIV/0!
Os01g0218700	0.868999	0.659313	1.21915	1.18029	ns	ns	ns	ns			Os01g0218700	0.981938	0.266117
Os01g0218800	ns	ns	-1.23467	ns	ns	ns	-0.84344	ns			Os01g0218800	-1.03905	0.27664
Os01g0218900	ns	ns	ns	-0.443044	ns	ns	ns	-0.687037			Os01g0218900	-0.565041	0.172529
Os01g0219100	ns	ns	ns	-0.591021	ns	ns	ns	ns			Os01g0219100	-0.591021	#DIV/0!
Os01g0219300	0.630366	ns	ns	0.848722	ns	ns	ns	0.681343			Os01g0219300	0.720144	0.114232
Os01g0220100	2.03304	-2.22289	-2.8984	ns	3.13361	ns	ns	1.12843			Os01g0220100	0.23476	2.65954
Os01g0220300	-0.512232	-0.876264	ns	-1.16958	ns	ns	ns	-0.696594			Os01g0220300	-0.813669	0.279979
Os01g0220900	-7.06787	ns	ns	-8.41475	ns	10.5109	11.2117	ns			Os01g0220900	1.56	10.7581
Os01g0221000	ns	ns	ns	ns	ns	ns	-0.681245	ns			Os01g0221000	-0.681245	#DIV/0!
Os01g0221100	-0.729664	ns	-1.00234	-0.827787	ns	ns	-0.879445	ns			Os01g0221100	-0.859808	0.113525
Os01g0221400	ns	-0.892178	-0.809854	ns	ns	ns	ns	ns			Os01g0221400	-0.851016	0.0582122
Os01g0221500	0.520333	0.876851	0.481353	0.67868	ns	ns	ns	ns			Os01g0221500	0.639304	0.17989
Os01g0221700	ns	ns	1.16477	1.64452	ns	ns	1.46942	1.9978			Os01g0221700	1.56913	0.347798
Os01g0221800	ns	ns	ns	1.25976	1.48224	ns	1.4617	1.88255			Os01g0221800	1.52156	0.260757
Os01g0222300	-0.985358	-1.07996	-1.6628	-2.05158	ns	ns	ns	-1.22588			Os01g0222300	-1.40112	0.446733
Os01g0222500	-0.4627	-0.752784	-0.879985	-1.57597	ns	ns	ns	-1.04746			Os01g0222500	-0.94378	0.413038
Os01g0222600	1.61034	0.810749	1.6676	-0.529699	ns	ns	ns	ns			Os01g0222600	0.889746	1.02394
Os01g0222800	ns	-6.54585	-7.42694	ns	ns	-7.3117	-8.2002	ns			Os01g0222800	-7.37117	0.677029
Os01g0222900	ns	ns	-4.35894	ns	ns	ns	-5.58736	ns			Os01g0222900	-4.97315	0.868628
Os01g0223000	-0.600633	-1.4499	-11.4772	ns	-0.663287	-1.4555	-11.5402	ns			Os01g0223000	-4.53112	5.41734
Os01g0223200	0.797799	ns	0.913338	-0.576147	ns	ns	0.958917	ns			Os01g0223200	0.523477	0.736212
Os01g0223300	-6.18639	1.71611	3.27103	-7.06353	ns	9.19096	10.9287	ns			Os01g0223300	1.97614	7.51383
Os01g0223500	1.2994	ns	1.01856	ns	1.62715	ns	1.33817	ns			Os01g0223500	1.32082	0.248969
Os01g0223600	ns	ns	-1.78149	0.300273	ns	ns	-2.04444	ns			Os01g0223600	-1.17522	1.28456
Os01g0223700	ns	ns	ns	-0.495784	ns	ns	ns	ns			Os01g0223700	-0.495784	#DIV/0!
Os01g0223900	ns	ns	ns	1.43036	ns	ns	ns	1.30902			Os01g0223900	1.36969	0.085799
Os01g0224000	1.18237	0.92174	1.09053	0.556057	ns	ns	ns	ns			Os01g0224000	0.937675	0.276363
Os01g0224100	ns	ns	-0.753695	ns	ns	ns	-1.27812	ns			Os01g0224100	-1.01591	0.370825
Os01g0224166	ns	ns	1.0192	-1.71478	ns	ns	ns	-2.16893			Os01g0224166	-0.954836	1.72458
Os01g0224200	ns	-2.7057	-0.952654	ns	ns	-1.91388	ns	ns			Os01g0224200	-1.85741	0.877884
Os01g0224300	1.09545	ns	1.78888	-1.5708	ns	ns	ns	-1.5853			Os01g0224300	-0.0679442	1.76656
Os01g0224400	ns	ns	ns	1.64679	ns	ns	ns	1.06029			Os01g0224400	1.35354	0.414717
Os01g0224500	-0.466415	-0.767469	-0.457428	-0.32665	ns	ns	ns	ns			Os01g0224500	-0.504491	0.186592
Os01g0225000	ns	ns	0.734393	1.31785	-2.10099	ns	ns	ns			Os01g0225000	-0.0162503	1.82886
Os01g0225100	-0.283019	ns	ns	-0.403706	ns	ns	ns	ns			Os01g0225100	-0.343362	0.0853386
Os01g0225300	ns	ns	ns	0.875504	ns	ns	ns	ns			Os01g0225300	0.875504	#DIV/0!
Os01g0225400	ns	ns	ns	-0.449812	ns	ns	ns	-0.513094			Os01g0225400	-0.481453	0.0447471
Os01g0225500	ns	-7.88323	-5.63897	-1.54754	ns	-6.68811	-4.59986	ns			Os01g0225500	-5.27154	2.41257
Os01g0225550	ns	ns	-2.87205	1.18554	ns	ns	-3.15807	ns			Os01g0225550	-1.61486	2.42943
Os01g0225600	ns	ns	ns	ns	ns	ns	-1.96187	ns			Os01g0225600	-1.96187	#DIV/0!
Os01g0226200	0.544022	ns	ns	ns	ns	ns	ns	ns			Os01g0226200	0.544022	#DIV/0!
Os01g0226250	ns	ns	-0.784001	-0.556987	ns	ns	ns	ns			Os01g0226250	-0.670494	0.160524
Os01g0226300	-0.487372	-0.515019	-0.60797	-0.572217	ns	ns	ns	ns			Os01g0226300	-0.545645	0.0545409
Os01g0226400	0.871161	1.24079	1.70813	ns	ns	ns	1.04217	-1.11868			Os01g0226400	0.748714	1.08982
Os01g0226450	ns	ns	ns	ns	ns	ns	ns	-2.09988			Os01g0226450	-2.09988	#DIV/0!
Os01g0226500	ns	ns	ns	-0.360505	ns	ns	ns	ns			Os01g0226500	-0.360505	#DIV/0!
Os01g0226666	ns	ns	ns	0.669651	ns	ns	-1.89713	ns			Os01g0226666	-0.613739	1.81499
Os01g0226700	ns	1.73447	ns	ns	-2.89924	ns	-2.37278	-1.9617			Os01g0226700	-1.37481	2.10807
Os01g0227100	0.700571	ns	1.00193	1.09085	1.11202	ns	1.4128	1.55558			Os01g0227100	1.14562	0.304071
Os01g0227200	-0.369529	0.629012	0.570279	-0.391716	-0.750338	ns	ns	-0.723521			Os01g0227200	-0.172635	0.619442
Os01g0227250	ns	ns	ns	ns	ns	ns	ns	-1.88412			Os01g0227250	-1.88412	#DIV/0!
Os01g0227300	ns	ns	0.29695	0.211388	ns	ns	ns	ns			Os01g0227300	0.254169	0.0605014
Os01g0227500	ns	-3.10814	-4.69731	0.760344	3.99208	ns	ns	4.49054			Os01g0227500	0.287502	4.12286
Os01g0227800	2.91385	ns	-3.06352	1.24326	4.11529	ns	ns	2.25749			Os01g0227800	1.49327	2.75245
Os01g0228300	ns	ns	ns	0.675364	ns	ns	ns	0.455792			Os01g0228300	0.565578	0.155261
Os01g0228400	1.34072	ns	1.72245	1.19496	1.05539	ns	1.4328	0.947105			Os01g0228400	1.28224	0.279736
Os01g0228500	0.821527	ns	ns	2.0679	ns	ns	ns	ns			Os01g0228500	1.44472	0.881322
Os01g0228600	ns	ns	ns	0.323305	ns	ns	ns	ns			Os01g0228600	0.323305	#DIV/0!
Os01g0228800	ns	ns	-1.22564	1.8224	-1.48991	ns	-2.55147	ns			Os01g0228800	-0.861156	1.87855
Os01g0228901	ns	-1.66279	-1.72841	ns	ns	ns	-1.43278	ns			Os01g0228901	-1.60799	0.155246
Os01g0229000	ns	-1.82882	-1.55489	ns	ns	ns	-1.2754	ns			Os01g0229000	-1.55304	0.276719
Os01g0229100	ns	ns	-0.58715	-0.846026	ns	ns	ns	ns			Os01g0229100	-0.716588	0.183053
Os01g0229200	ns	0.462935	0.639223	0.374161	ns	ns	0.578689	0.355781			Os01g0229200	0.482158	0.124491
Os01g0229300	ns	ns	ns	0.824084	ns	ns	ns	ns			Os01g0229300	0.824084	#DIV/0!
Os01g0229400	-0.749701	-0.863527	-0.738917	-1.77039	ns	ns	ns	-1.26999			Os01g0229400	-1.0785	0.443006
Os01g0229500	ns	ns	ns	-1.42983	ns	ns	ns	-1.53802			Os01g0229500	-1.48393	0.0765016
Os01g0229900	ns	ns	ns	-0.480802	ns	ns	ns	ns			Os01g0229900	-0.480802	#DIV/0!
Os01g0230200	ns	ns	ns	-0.765651	ns	ns	ns	ns			Os01g0230200	-0.765651	#DIV/0!
Os01g0231000	ns	ns	ns	-0.689796	ns	ns	ns	ns			Os01g0231000	-0.689796	#DIV/0!
Os01g0231500	ns	0.456	ns	0.867597	ns	ns	ns	0.725737			Os01g0231500	0.683111	0.209083
Os01g0231600	ns	ns	ns	1.32039	ns	ns	ns	1.4555			Os01g0231600	1.38794	0.0955365
Os01g0231700	-0.776202	-1.35777	-0.695706	-1.38517	ns	ns	ns	ns			Os01g0231700	-1.05371	0.368554
Os01g0231800	0.746095	ns	0.552328	0.989737	ns	ns	ns	0.669395			Os01g0231800	0.739389	0.184942
Os01g0231900	ns	ns	0.956861	-0.512488	ns	ns	0.982957	ns			Os01g0231900	0.475777	0.855962
Os01g0231950	ns	0.182995	ns	ns	ns	ns	ns	ns			Os01g0231950	0.182995	#DIV/0!
Os01g0232000	ns	ns	ns	0.618453	ns	ns	-1.75391	ns			Os01g0232000	-0.56773	1.67752
Os01g0232100	3.11938	ns	ns	ns	ns	ns	ns	ns			Os01g0232100	3.11938	#DIV/0!
Os01g0232200	ns	ns	2.64077	ns	ns	ns	ns	ns			Os01g0232200	2.64077	#DIV/0!
Os01g0232300	-0.675322	-0.504392	ns	-0.753648	ns	ns	ns	ns			Os01g0232300	-0.644454	0.127463
Os01g0232400	ns	ns	0.537574	0.607385	ns	ns	0.523854	0.629824			Os01g0232400	0.574659	0.0518672
Os01g0232500	ns	ns	0.430452	-0.315284	ns	ns	ns	ns			Os01g0232500	0.0575842	0.527315
Os01g0232700	ns	ns	ns	-0.415051	ns	ns	ns	ns			Os01g0232700	-0.415051	#DIV/0!
Os01g0232800	ns	ns	ns	-0.516409	ns	ns	ns	ns			Os01g0232800	-0.516409	#DIV/0!
Os01g0233000	1.46613	1.48163	1.47432	1.38943	1.03909	1.06181	1.05806	1.00964			Os01g0233000	1.24751	0.221872
Os01g0233100	ns	-1.90419	-1.19918	-1.39265	ns	ns	ns	ns			Os01g0233100	-1.49867	0.364266
Os01g0233400	ns	ns	ns	0.51783	ns	ns	ns	ns			Os01g0233400	0.51783	#DIV/0!
Os01g0233500	ns	-1.99525	-1.53357	-1.04086	0.982505	ns	ns	ns			Os01g0233500	-0.896793	1.31207
Os01g0233800	ns	-4.34836	ns	ns	ns	ns	ns	ns			Os01g0233800	-4.34836	#DIV/0!
Os01g0233900	-0.986909	ns	ns	-0.66235	ns	ns	ns	ns			Os01g0233900	-0.82463	0.229498
Os01g0234100	ns	ns	-2.60732	ns	ns	ns	ns	ns			Os01g0234100	-2.60732	#DIV/0!
Os01g0234200	ns	-3.04271	ns	-2.21378	ns	ns	ns	ns			Os01g0234200	-2.62824	0.586137
Os01g0234433	ns	ns	1.46155	ns	ns	ns	ns	-1.55522			Os01g0234433	-0.046833	2.13318
Os01g0234800	ns	0.599883	0.524755	ns	-0.573131	ns	ns	ns			Os01g0234800	0.183836	0.656628
Os01g0234900	0.598908	1.10706	0.636556	1.30599	ns	ns	ns	ns			Os01g0234900	0.91213	0.349845
Os01g0235100	3.1019	ns	1.71542	1.85833	5.14075	1.91766	3.79336	3.93801			Os01g0235100	3.06649	1.30362
Os01g0235200	ns	ns	-0.617691	0.534669	ns	ns	ns	ns			Os01g0235200	-0.0415109	0.814841
Os01g0235300	0.59621	ns	0.762579	0.487928	ns	ns	0.826687	ns			Os01g0235300	0.668351	0.154603
Os01g0235325	ns	ns	ns	2.2296	-1.90297	ns	ns	ns			Os01g0235325	0.163311	2.92217
Os01g0235350	ns	ns	ns	ns	ns	ns	-1.00578	ns			Os01g0235350	-1.00578	#DIV/0!
Os01g0235400	-0.664838	-0.444169	-0.431162	ns	ns	ns	ns	ns			Os01g0235400	-0.51339	0.131319
Os01g0235632	ns	1.61432	ns	2.62452	ns	ns	ns	ns			Os01g0235632	2.11942	0.714314
Os01g0235700	0.531854	0.922798	0.595697	0.56171	ns	ns	ns	ns			Os01g0235700	0.653015	0.181737
Os01g0235800	ns	ns	ns	0.58905	ns	ns	ns	0.56288			Os01g0235800	0.575965	0.0185051
Os01g0235900	ns	ns	2.63358	1.93827	ns	ns	3.13323	2.48396			Os01g0235900	2.54726	0.491831
Os01g0236000	ns	ns	-0.564129	0.476802	ns	ns	-0.722388	ns			Os01g0236000	-0.269905	0.651491
Os01g0236300	ns	1.05207	0.659803	ns	-1.01596	ns	ns	ns			Os01g0236300	0.231972	1.09839
Os01g0236700	0.455248	0.884376	0.494858	ns	ns	ns	ns	ns			Os01g0236700	0.611494	0.237151
Os01g0236800	ns	ns	ns	ns	-0.528029	ns	ns	ns			Os01g0236800	-0.528029	#DIV/0!
Os01g0236900	-3.25906	ns	ns	-3.22546	-3.25634	ns	ns	-3.20585			Os01g0236900	-3.23668	0.0255835
Os01g0237000	ns	ns	4.26452	ns	ns	ns	4.39356	ns			Os01g0237000	4.32904	0.0912465
Os01g0237500	ns	-3.93974	ns	ns	ns	ns	ns	ns			Os01g0237500	-3.93974	#DIV/0!
Os01g0237750	ns	ns	ns	1.63385	ns	ns	ns	ns			Os01g0237750	1.63385	#DIV/0!
Os01g0238200	-1.00511	ns	0.625897	-2.00383	-1.29163	ns	ns	-2.24726			Os01g0238200	-1.18439	1.13159
Os01g0238500	ns	ns	ns	ns	1.05051	ns	ns	ns			Os01g0238500	1.05051	#DIV/0!
Os01g0238600	ns	-0.606599	ns	0.313901	ns	ns	ns	ns			Os01g0238600	-0.146349	0.650892
Os01g0238700	ns	ns	ns	1.98254	ns	ns	ns	ns			Os01g0238700	1.98254	#DIV/0!
Os01g0238800	-0.447554	-0.777253	ns	-1.11813	ns	ns	ns	ns			Os01g0238800	-0.780979	0.335303
Os01g0238850	ns	ns	ns	-0.965778	ns	ns	ns	ns			Os01g0238850	-0.965778	#DIV/0!
Os01g0238900	-0.315105	ns	ns	-1.05003	ns	ns	ns	ns			Os01g0238900	-0.682568	0.519671
Os01g0239000	1.48332	0.832401	ns	2.5912	ns	ns	ns	1.28535			Os01g0239000	1.54807	0.746888
Os01g0239100	0.65747	ns	0.515767	1.10894	ns	ns	0.53662	1.16165			Os01g0239100	0.796088	0.314892
Os01g0239200	1.7039	0.530497	1.28943	1.51741	1.92389	0.703771	1.50903	1.77376			Os01g0239200	1.36896	0.50391
Os01g0239700	ns	ns	ns	0.436377	ns	ns	ns	ns			Os01g0239700	0.436377	#DIV/0!
Os01g0241000	2.3231	ns	ns	ns	2.70375	ns	ns	ns			Os01g0241000	2.51342	0.26916
Os01g0241100	-0.382483	-0.725178	ns	-0.514994	ns	ns	ns	ns			Os01g0241100	-0.540885	0.172808
Os01g0241400	ns	1.65204	ns	2.58767	ns	ns	ns	ns			Os01g0241400	2.11985	0.66159
Os01g0242200	ns	ns	-1.03382	-0.955145	ns	ns	-1.09595	-0.972378			Os01g0242200	-1.01432	0.0640438
Os01g0242300	-0.50774	ns	-0.975436	ns	ns	ns	ns	ns			Os01g0242300	-0.741588	0.330711
Os01g0242500	ns	-0.702566	-0.42429	-1.10737	ns	ns	ns	-0.791503			Os01g0242500	-0.756432	0.28143
Os01g0242600	ns	0.604856	0.708829	ns	ns	ns	ns	ns			Os01g0242600	0.656843	0.0735199
Os01g0242900	0.575786	ns	ns	ns	ns	ns	ns	ns			Os01g0242900	0.575786	#DIV/0!
Os01g0243000	0.982275	1.32891	1.07814	1.06368	ns	ns	ns	ns			Os01g0243000	1.11325	0.149836
Os01g0243100	-0.684019	-2.12694	-1.75349	-1.70956	ns	-1.43219	-1.18633	-1.1263			Os01g0243100	-1.43126	0.478994
Os01g0243200	-1.59675	ns	-2.36728	ns	-2.01128	ns	-2.77042	ns			Os01g0243200	-2.18643	0.500716
Os01g0243300	ns	ns	ns	ns	-4.15648	ns	ns	ns			Os01g0243300	-4.15648	#DIV/0!
Os01g0243400	ns	ns	ns	0.474088	ns	ns	ns	ns			Os01g0243400	0.474088	#DIV/0!
Os01g0243450	1.14933	ns	ns	1.56509	ns	ns	ns	0.991154			Os01g0243450	1.23519	0.296445
Os01g0243600	ns	ns	ns	ns	ns	ns	-1.30529	ns			Os01g0243600	-1.30529	#DIV/0!
Os01g0243700	ns	-1.09754	-0.825266	-1.88027	ns	ns	ns	-0.939022			Os01g0243700	-1.18552	0.47643
Os01g0243800	ns	ns	ns	0.631933	ns	ns	ns	0.522008			Os01g0243800	0.57697	0.0777285
Os01g0246400	ns	-5.19877	-2.70767	-1.47393	ns	-3.54527	ns	ns			Os01g0246400	-3.23141	1.56334
Os01g0246500	-0.448573	ns	ns	-0.345284	-0.641636	ns	ns	-0.50061			Os01g0246500	-0.484026	0.123318
Os01g0246601	ns	ns	ns	ns	ns	ns	ns	1.24518			Os01g0246601	1.24518	#DIV/0!
Os01g0246700	ns	1.73315	ns	1.24424	ns	ns	ns	ns			Os01g0246700	1.4887	0.345711
Os01g0247900	ns	ns	ns	0.678411	ns	ns	ns	0.740785			Os01g0247900	0.709598	0.044105
Os01g0248000	-1.30817	-2.5988	-1.95769	-3.76807	ns	-2.12918	-1.54619	-3.3412			Os01g0248000	-2.37847	0.911393
Os01g0248300	2.90249	1.82061	ns	5.04814	ns	ns	ns	3.37966			Os01g0248300	3.28773	1.34268
Os01g0248400	ns	ns	-0.785655	-0.533313	ns	ns	-0.708243	-0.425165			Os01g0248400	-0.613094	0.163822
Os01g0248500	ns	ns	-2.01825	2.35025	ns	ns	-2.06941	1.73195			Os01g0248500	-0.00136578	2.37199
Os01g0248600	-0.730785	ns	0.43146	-1.48269	ns	ns	ns	-1.13191			Os01g0248600	-0.72848	0.832076
Os01g0248701	-3.20217	ns	-5.31831	ns	-4.46825	ns	-6.85625	ns			Os01g0248701	-4.96125	1.53361
Os01g0248800	1.40761	ns	ns	2.36898	ns	ns	ns	2.76532			Os01g0248800	2.18063	0.698175
Os01g0248850	2.15542	ns	ns	2.69929	2.61043	ns	ns	3.27139			Os01g0248850	2.68413	0.458284
Os01g0248900	ns	ns	-2.33857	1.95446	ns	ns	ns	2.88106			Os01g0248900	0.832316	2.78487
Os01g0249200	1.75186	ns	ns	0.947365	1.94577	ns	ns	1.15945			Os01g0249200	1.45111	0.473975
Os01g0249300	-0.389726	-0.377796	-0.615127	-0.283587	ns	ns	-0.483071	ns			Os01g0249300	-0.429861	0.125372
Os01g0249700	ns	ns	ns	-1.79597	ns	ns	ns	ns			Os01g0249700	-1.79597	#DIV/0!
Os01g0249900	3.27269	ns	ns	2.70102	3.90503	ns	ns	3.37257			Os01g0249900	3.31283	0.493352
Os01g0250600	-0.586244	-0.85045	-0.472634	-1.66167	ns	ns	ns	-1.08437			Os01g0250600	-0.931074	0.472452
Os01g0250900	ns	ns	ns	-0.753494	ns	ns	ns	ns			Os01g0250900	-0.753494	#DIV/0!
Os01g0251000	-0.774385	ns	0.345079	-1.51832	ns	ns	ns	-1.33808			Os01g0251000	-0.821427	0.83975
Os01g0251100	-0.522929	-1.0403	-0.42448	-1.07145	ns	ns	ns	ns			Os01g0251100	-0.76479	0.33875
Os01g0251200	ns	ns	0.333213	1.74032	ns	ns	ns	ns			Os01g0251200	1.03677	0.994973
Os01g0251400	ns	ns	ns	ns	ns	2.76327	2.40951	0.969571			Os01g0251400	2.04745	0.950081
Os01g0252100	-0.438394	ns	ns	0.723236	ns	ns	ns	ns			Os01g0252100	0.142421	0.821396
Os01g0252200	0.559472	ns	ns	ns	0.583009	ns	ns	ns			Os01g0252200	0.571241	0.0166428
Os01g0252400	ns	ns	ns	1.92563	ns	ns	ns	3.91351			Os01g0252400	2.91957	1.40564
Os01g0253300	-0.424264	ns	0.463676	-0.960567	ns	ns	ns	-0.853961			Os01g0253300	-0.443779	0.647862
Os01g0253400	ns	ns	ns	0.683535	ns	ns	ns	0.959226			Os01g0253400	0.821381	0.194942
Os01g0253500	2.2422	2.46686	1.2002	3.6702	ns	ns	ns	2.15377			Os01g0253500	2.34664	0.884405
Os01g0253600	ns	-1.6423	-0.900698	-2.93273	ns	ns	ns	-2.02859			Os01g0253600	-1.87608	0.845732
Os01g0253900	0.984175	ns	-1.05204	1.82354	ns	ns	-2.64148	ns			Os01g0253900	-0.221452	2.0151
Os01g0254000	ns	ns	0.49048	ns	ns	ns	0.624803	ns			Os01g0254000	0.557641	0.0949805
Os01g0254100	ns	ns	0.498269	0.568469	ns	ns	ns	0.448696			Os01g0254100	0.505145	0.060182
Os01g0254200	-0.413796	ns	-0.551915	0.300198	ns	ns	ns	ns			Os01g0254200	-0.221838	0.457341
Os01g0254300	ns	1.45101	1.20637	ns	ns	0.743568	ns	-0.666735			Os01g0254300	0.683553	0.946785
Os01g0254850	ns	4.27139	1.73693	5.03316	ns	ns	ns	ns			Os01g0254850	3.6805	1.72573
Os01g0254900	ns	0.603908	0.443406	0.570156	ns	ns	ns	ns			Os01g0254900	0.539157	0.0846221
Os01g0254950	ns	ns	ns	0.729198	ns	ns	ns	ns			Os01g0254950	0.729198	#DIV/0!
Os01g0255000	ns	ns	-1.56002	ns	ns	ns	-1.58482	ns			Os01g0255000	-1.57242	0.0175318
Os01g0255100	ns	ns	ns	-1.62345	ns	ns	ns	ns			Os01g0255100	-1.62345	#DIV/0!
Os01g0255700	-3.11769	ns	ns	-1.32031	-3.44574	ns	ns	-1.55195			Os01g0255700	-2.35892	1.07809
Os01g0256400	ns	ns	ns	-0.846371	ns	ns	ns	ns			Os01g0256400	-0.846371	#DIV/0!
Os01g0256500	-1.44524	1.08714	2.09349	-3.10597	-1.8967	ns	1.51239	-3.53115			Os01g0256500	-0.755147	2.29719
Os01g0256600	-2.9355	ns	ns	-3.67835	-2.74625	ns	ns	-3.46295			Os01g0256600	-3.20576	0.437296
Os01g0256800	-0.634363	ns	-1.02477	ns	-1.68119	ns	-2.09488	ns			Os01g0256800	-1.3588	0.65374
Os01g0257100	ns	ns	0.753924	0.969933	ns	ns	ns	ns			Os01g0257100	0.861928	0.152741
Os01g0257300	1.51802	2.87619	ns	2.97191	ns	2.38501	ns	2.64521			Os01g0257300	2.47927	0.583238
Os01g0257400	0.368069	ns	ns	1.23506	ns	ns	ns	ns			Os01g0257400	0.801566	0.613056
Os01g0257900	-1.66754	ns	-0.863062	-1.52316	-1.64674	ns	-0.842211	-1.45948			Os01g0257900	-1.3337	0.380583
Os01g0258600	-5.38269	-0.717851	ns	-6.14259	-4.61399	ns	ns	-5.41386			Os01g0258600	-4.4542	2.15752
Os01g0258700	ns	ns	0.294812	ns	-0.378545	ns	ns	ns			Os01g0258700	-0.0418663	0.476135
Os01g0259200	0.49606	0.914915	0.720246	0.905152	ns	ns	ns	0.511698			Os01g0259200	0.709614	0.203269
Os01g0259400	-0.701238	-2.31706	-1.37277	-2.08696	ns	ns	ns	-1.04103			Os01g0259400	-1.50381	0.684999
Os01g0259600	ns	ns	ns	0.240734	ns	ns	ns	ns			Os01g0259600	0.240734	#DIV/0!
Os01g0259900	-0.824358	ns	-2.3616	-1.15041	ns	ns	-2.15963	-0.924537			Os01g0259900	-1.48411	0.722161
Os01g0259933	-2.44192	ns	-0.737659	-1.40737	-2.96909	ns	-1.24996	-1.88546			Os01g0259933	-1.78191	0.820908
Os01g0260000	ns	0.99872	ns	1.68758	ns	ns	ns	ns			Os01g0260000	1.34315	0.4871
Os01g0260100	ns	ns	0.664223	-2.03982	ns	ns	ns	-2.16396			Os01g0260100	-1.17985	1.59822
Os01g0260500	ns	1.43029	ns	ns	ns	ns	ns	ns			Os01g0260500	1.43029	#DIV/0!
Os01g0260700	ns	ns	ns	-0.39836	ns	ns	0.638383	ns			Os01g0260700	0.120011	0.733088
Os01g0260800	ns	ns	ns	-0.563265	ns	0.518505	0.805963	ns			Os01g0260800	0.253735	0.721993
Os01g0261000	ns	ns	1.86257	1.62775	ns	ns	ns	ns			Os01g0261000	1.74516	0.166044
Os01g0261100	ns	ns	ns	1.27565	ns	ns	-1.16242	ns			Os01g0261100	0.056613	1.72398
Os01g0261200	0.570386	1.58984	0.890985	1.40334	ns	ns	ns	ns			Os01g0261200	1.11364	0.467403
Os01g0261500	-0.636025	ns	ns	-0.836422	ns	ns	ns	ns			Os01g0261500	-0.736223	0.141702
Os01g0261600	ns	ns	ns	ns	-5.26884	ns	-2.35777	ns			Os01g0261600	-3.8133	2.05844
Os01g0262401	-9.90705	ns	-10.2716	-10.6597	-12.0153	ns	-12.3798	-12.6771			Os01g0262401	-11.3184	1.18153
Os01g0262500	ns	ns	ns	0.861134	ns	ns	ns	1.39356			Os01g0262500	1.12735	0.376484
Os01g0262600	-0.428	ns	-0.347085	-1.77177	ns	ns	ns	-1.41921			Os01g0262600	-0.991514	0.71287
Os01g0262700	-0.439743	-0.667183	ns	-1.54635	ns	ns	ns	-1.28121			Os01g0262700	-0.983621	0.516771
Os01g0263000	ns	ns	ns	ns	1.80645	ns	ns	ns			Os01g0263000	1.80645	#DIV/0!
Os01g0263300	ns	ns	ns	-0.870964	0.978263	ns	ns	ns			Os01g0263300	0.0536494	1.3076
Os01g0263400	ns	-1.34049	ns	-1.00264	ns	ns	ns	ns			Os01g0263400	-1.17157	0.238901
Os01g0263500	-0.391483	-0.761978	ns	ns	ns	ns	ns	0.64164			Os01g0263500	-0.170607	0.72741
Os01g0263600	ns	ns	ns	2.81687	-1.59352	ns	ns	1.84933			Os01g0263600	1.02423	2.31808
Os01g0263900	0.797053	1.43077	1.2565	ns	ns	1.4516	1.30066	ns			Os01g0263900	1.24731	0.265072
Os01g0264000	1.54118	1.6272	2.03446	ns	ns	ns	1.15042	ns			Os01g0264000	1.58832	0.362646
Os01g0264400	ns	ns	ns	-0.963115	ns	ns	ns	-0.92439			Os01g0264400	-0.943753	0.0273828
Os01g0264500	ns	ns	0.50463	ns	ns	ns	ns	ns			Os01g0264500	0.50463	#DIV/0!
Os01g0264600	ns	ns	-0.754785	-3.71722	ns	ns	ns	-2.843			Os01g0264600	-2.43834	1.52211
Os01g0264700	ns	ns	-0.86526	0.779465	ns	ns	-1.06423	ns			Os01g0264700	-0.383343	1.01192
Os01g0265000	ns	-1.09236	-0.919484	-1.27209	ns	ns	ns	-0.770416			Os01g0265000	-1.01359	0.216807
Os01g0265100	ns	-1.60842	-1.93721	0.960674	ns	-2.0237	-2.37347	ns			Os01g0265100	-1.39643	1.34549
Os01g0265200	ns	-1.1643	-0.76654	-0.438127	ns	-1.05308	-0.665635	ns			Os01g0265200	-0.817537	0.293834
Os01g0265400	-0.558843	ns	ns	-1.68523	ns	ns	ns	-1.25658			Os01g0265400	-1.16688	0.568526
Os01g0265700	-0.487488	ns	ns	0.569188	ns	ns	ns	0.813327			Os01g0265700	0.298342	0.69141
Os01g0265800	ns	ns	ns	-0.257799	ns	ns	ns	ns			Os01g0265800	-0.257799	#DIV/0!
Os01g0265900	ns	-0.991296	-0.655177	-1.1021	ns	ns	ns	-0.74212			Os01g0265900	-0.872673	0.209011
Os01g0266000	-0.381809	ns	ns	-0.749132	ns	ns	ns	ns			Os01g0266000	-0.56547	0.259737
Os01g0266100	ns	ns	ns	1.43176	ns	ns	ns	ns			Os01g0266100	1.43176	#DIV/0!
Os01g0266200	6.25013	ns	ns	ns	5.42563	ns	ns	ns			Os01g0266200	5.83788	0.583008
Os01g0266400	ns	ns	0.920173	-1.80933	ns	ns	ns	ns			Os01g0266400	-0.444577	1.93005
Os01g0266500	ns	ns	ns	-2.17429	ns	ns	ns	ns			Os01g0266500	-2.17429	#DIV/0!
Os01g0266600	ns	ns	-0.60255	ns	ns	ns	ns	ns			Os01g0266600	-0.60255	#DIV/0!
Os01g0267050	ns	ns	-5.0189	ns	ns	ns	-5.85766	ns			Os01g0267050	-5.43828	0.593092
Os01g0267100	ns	ns	0.423207	-0.47257	ns	ns	ns	ns			Os01g0267100	-0.0246812	0.63341
Os01g0267200	ns	ns	ns	-0.257082	ns	ns	ns	ns			Os01g0267200	-0.257082	#DIV/0!
Os01g0267300	1.15238	3.13389	1.43766	1.88622	1.32767	3.29388	1.61878	2.14851			Os01g0267300	1.99987	0.813008
Os01g0267400	ns	0.553684	0.928203	-0.32207	ns	ns	0.82651	ns			Os01g0267400	0.496582	0.568214
Os01g0267600	ns	ns	-0.622056	2.1697	ns	ns	-1.29044	1.33345			Os01g0267600	0.397664	1.62331
Os01g0267800	ns	ns	-1.07329	0.691076	ns	ns	-2.08359	ns			Os01g0267800	-0.821932	1.4043
Os01g0267900	-0.506767	ns	ns	-0.987996	ns	ns	ns	-0.673909			Os01g0267900	-0.722891	0.244325
Os01g0268000	5.85679	ns	ns	ns	ns	ns	-3.85239	ns			Os01g0268000	1.0022	6.86542
Os01g0268100	-0.766828	ns	ns	-0.750606	ns	ns	ns	ns			Os01g0268100	-0.758717	0.011471
Os01g0268300	ns	-0.794654	ns	-1.6896	ns	ns	ns	-1.08903			Os01g0268300	-1.1911	0.456122
Os01g0268600	ns	ns	-1.0702	ns	ns	ns	ns	ns			Os01g0268600	-1.0702	#DIV/0!
Os01g0268800	ns	ns	-0.585598	1.77666	ns	ns	-1.35292	ns			Os01g0268800	-0.0539522	1.63112
Os01g0268900	ns	ns	ns	-0.580462	ns	ns	ns	-0.441149			Os01g0268900	-0.510805	0.0985088
Os01g0269000	ns	ns	0.691103	ns	ns	ns	0.758758	ns			Os01g0269000	0.72493	0.0478389
Os01g0269100	ns	ns	ns	ns	ns	ns	ns	0.431755			Os01g0269100	0.431755	#DIV/0!
Os01g0269500	2.86144	ns	1.59489	1.03024	ns	ns	ns	ns			Os01g0269500	1.82885	0.937754
Os01g0269550	9.06355	6.54542	5.4936	1.83252	3.9723	ns	ns	ns			Os01g0269550	5.38148	2.71597
Os01g0269900	ns	-0.652991	-0.609126	-0.419074	ns	ns	ns	ns			Os01g0269900	-0.560397	0.124339
Os01g0270100	ns	0.562369	0.507719	0.763068	ns	ns	0.719657	1.03604			Os01g0270100	0.71777	0.207135
Os01g0270300	ns	ns	ns	-0.553901	ns	ns	ns	ns			Os01g0270300	-0.553901	#DIV/0!
Os01g0271200	ns	0.740088	1.08001	0.329363	ns	ns	0.83203	ns			Os01g0271200	0.745373	0.312295
Os01g0271500	-0.349271	ns	ns	-0.510786	ns	ns	ns	ns			Os01g0271500	-0.430028	0.114209
Os01g0271700	ns	ns	ns	-0.610371	ns	ns	ns	ns			Os01g0271700	-0.610371	#DIV/0!
Os01g0272600	ns	ns	ns	1.42087	ns	ns	ns	0.901204			Os01g0272600	1.16104	0.367459
Os01g0272800	ns	ns	0.801777	ns	ns	ns	ns	ns			Os01g0272800	0.801777	#DIV/0!
Os01g0273000	ns	-0.662628	ns	0.704316	ns	ns	ns	0.830116			Os01g0273000	0.290601	0.827913
Os01g0273100	ns	-2.36684	-1.35145	-3.00591	ns	ns	ns	-1.89289			Os01g0273100	-2.15427	0.703161
Os01g0273150	ns	ns	ns	-0.786311	ns	ns	ns	ns			Os01g0273150	-0.786311	#DIV/0!
Os01g0273300	ns	ns	ns	0.938246	ns	ns	ns	ns			Os01g0273300	0.938246	#DIV/0!
Os01g0273500	ns	ns	ns	-0.558427	ns	ns	ns	ns			Os01g0273500	-0.558427	#DIV/0!
Os01g0273800	ns	ns	-0.718031	0.567662	ns	-1.41157	-1.55811	ns			Os01g0273800	-0.780012	0.970287
Os01g0274500	ns	-2.70483	-1.77368	-3.0903	ns	-1.90087	ns	-2.34051			Os01g0274500	-2.36204	0.549357
Os01g0274601	3.01689	ns	ns	ns	ns	ns	ns	ns			Os01g0274601	3.01689	#DIV/0!
Os01g0274800	ns	ns	ns	2.66415	ns	ns	-2.31473	ns			Os01g0274800	0.174708	3.5206
Os01g0275300	ns	ns	ns	-1.09329	ns	ns	ns	-0.953173			Os01g0275300	-1.02323	0.0990762
Os01g0275600	ns	ns	-0.379905	0.316762	ns	ns	-0.58062	ns			Os01g0275600	-0.214588	0.470979
Os01g0275800	ns	ns	ns	-1.65138	ns	ns	ns	ns			Os01g0275800	-1.65138	#DIV/0!
Os01g0276000	ns	-1.08015	-0.718306	-1.02935	ns	-0.878438	ns	-0.830057			Os01g0276000	-0.90726	0.147726
Os01g0276100	ns	ns	ns	0.755134	ns	ns	ns	0.765238			Os01g0276100	0.760186	0.00714509
Os01g0276200	-0.684537	-1.13887	-0.865494	-0.772464	ns	-0.855702	ns	ns			Os01g0276200	-0.863414	0.170449
Os01g0276300	ns	ns	ns	ns	ns	ns	-2.76199	ns			Os01g0276300	-2.76199	#DIV/0!
Os01g0276400	ns	ns	ns	0.422591	ns	ns	ns	ns			Os01g0276400	0.422591	#DIV/0!
Os01g0276500	ns	ns	0.713528	-0.40168	ns	ns	0.948425	ns			Os01g0276500	0.420091	0.721301
Os01g0276600	ns	ns	0.99463	-0.564589	ns	ns	ns	ns			Os01g0276600	0.21502	1.10253
Os01g0276800	-0.422272	-0.622255	-0.573473	-0.767196	ns	ns	ns	ns			Os01g0276800	-0.596299	0.142227
Os01g0276900	ns	ns	ns	2.39766	ns	ns	ns	1.42211			Os01g0276900	1.90989	0.689819
Os01g0277500	ns	-0.687109	ns	ns	ns	-0.837393	ns	ns			Os01g0277500	-0.762251	0.106266
Os01g0277600	ns	ns	ns	0.788198	ns	ns	ns	ns			Os01g0277600	0.788198	#DIV/0!
Os01g0277700	ns	ns	ns	-0.304938	ns	ns	ns	ns			Os01g0277700	-0.304938	#DIV/0!
Os01g0278000	0.626324	2.07136	ns	1.80172	ns	ns	-1.85339	ns			Os01g0278000	0.661505	1.79013
Os01g0278050	ns	ns	-0.871794	ns	ns	ns	-1.07908	ns			Os01g0278050	-0.975438	0.146575
Os01g0278600	-0.584569	0.857849	0.859866	0.70795	ns	ns	ns	ns			Os01g0278600	0.460274	0.700186
Os01g0278900	1.55138	ns	1.66537	0.938876	1.87006	ns	1.98336	1.27117			Os01g0278900	1.5467	0.388511
Os01g0278950	ns	ns	ns	-0.753347	ns	ns	ns	ns			Os01g0278950	-0.753347	#DIV/0!
Os01g0279000	1.42547	2.11879	2.81992	1.16742	ns	ns	1.55055	ns			Os01g0279000	1.81643	0.660143
Os01g0279100	2.10482	ns	2.8824	0.860635	2.53087	ns	3.32169	1.26203			Os01g0279100	2.16041	0.949388
Os01g0279200	-0.466095	-0.730376	ns	-0.344778	ns	ns	ns	ns			Os01g0279200	-0.51375	0.197167
Os01g0279400	ns	ns	-1.81821	1.48123	ns	ns	-2.20621	ns			Os01g0279400	-0.84773	2.02625
Os01g0279800	ns	ns	ns	-0.872236	ns	ns	ns	ns			Os01g0279800	-0.872236	#DIV/0!
Os01g0280000	ns	ns	0.613835	0.322955	ns	ns	ns	ns			Os01g0280000	0.468395	0.205684
Os01g0280200	6.09133	ns	ns	ns	9.00468	ns	ns	ns			Os01g0280200	7.548	2.06005
Os01g0280400	ns	ns	ns	-0.530634	ns	ns	ns	ns			Os01g0280400	-0.530634	#DIV/0!
Os01g0280500	ns	3.88973	ns	-8.86908	ns	ns	-4.65867	-14.839			Os01g0280500	-6.11927	7.87209
Os01g0281000	0.602949	ns	ns	ns	ns	ns	ns	ns			Os01g0281000	0.602949	#DIV/0!
Os01g0281100	0.947744	ns	1.50188	2.74501	ns	ns	ns	ns			Os01g0281100	1.73155	0.920383
Os01g0281200	ns	ns	ns	-1.10592	0.990596	ns	ns	ns			Os01g0281200	-0.0576644	1.48246
Os01g0281301	ns	ns	-1.45179	-2.44727	ns	ns	ns	-1.72749			Os01g0281301	-1.87552	0.513983
Os01g0281400	ns	ns	ns	0.607765	ns	ns	ns	0.69036			Os01g0281400	0.649063	0.0584036
Os01g0281600	1.09931	ns	ns	ns	ns	ns	ns	ns			Os01g0281600	1.09931	#DIV/0!
Os01g0282251	ns	ns	ns	7.13021	ns	ns	ns	4.40769			Os01g0282251	5.76895	1.92511
Os01g0282800	ns	-0.499345	-0.536586	-0.598131	ns	ns	ns	ns			Os01g0282800	-0.544687	0.0498885
Os01g0282866	ns	ns	-1.4213	-1.3207	ns	ns	ns	ns			Os01g0282866	-1.371	0.0711318
Os01g0283000	ns	ns	ns	-0.496542	ns	ns	ns	ns			Os01g0283000	-0.496542	#DIV/0!
Os01g0283100	ns	ns	ns	-0.525932	ns	ns	0.715549	ns			Os01g0283100	0.0948083	0.87786
Os01g0283300	ns	1.48339	1.88771	2.04571	ns	1.36616	1.82295	2.04			Os01g0283300	1.77432	0.286598
Os01g0283400	ns	ns	ns	4.51269	ns	ns	ns	3.08683			Os01g0283400	3.79976	1.00823
Os01g0283500	ns	ns	-0.633237	2.50819	ns	ns	-1.033	1.8867			Os01g0283500	0.682164	1.77551
Os01g0284500	ns	ns	-2.17328	ns	ns	ns	-2.46836	ns			Os01g0284500	-2.32082	0.208658
Os01g0284700	ns	ns	ns	0.378227	ns	ns	ns	ns			Os01g0284700	0.378227	#DIV/0!
Os01g0284900	ns	ns	ns	3.38388	ns	ns	ns	ns			Os01g0284900	3.38388	#DIV/0!
Os01g0285300	ns	ns	0.795791	1.72819	ns	ns	ns	1.12414			Os01g0285300	1.21604	0.472942
Os01g0286000	ns	ns	ns	-0.390623	ns	ns	ns	ns			Os01g0286000	-0.390623	#DIV/0!
Os01g0286100	0.470337	0.701983	ns	ns	ns	ns	ns	ns			Os01g0286100	0.58616	0.163798
Os01g0286200	0.537624	ns	ns	ns	ns	ns	ns	ns			Os01g0286200	0.537624	#DIV/0!
Os01g0286600	0.550392	ns	0.537114	-0.738381	ns	ns	ns	ns			Os01g0286600	0.116375	0.74027
Os01g0286900	ns	ns	0.869605	1.14911	ns	ns	ns	ns			Os01g0286900	1.00936	0.197636
Os01g0287600	ns	ns	-3.14464	ns	ns	ns	-3.36591	ns			Os01g0287600	-3.25527	0.156456
Os01g0287700	ns	ns	ns	-0.488966	ns	ns	ns	ns			Os01g0287700	-0.488966	#DIV/0!
Os01g0288200	ns	ns	ns	-1.24092	1.7534	ns	1.86831	ns			Os01g0288200	0.793597	1.76288
Os01g0289100	ns	3.35362	ns	5.84116	ns	ns	-6.05868	2.04028			Os01g0289100	1.29409	5.14903
Os01g0289600	0.751939	ns	ns	1.45121	ns	ns	ns	1.2705			Os01g0289600	1.15788	0.362983
Os01g0289732	ns	ns	0.571794	6.98421	ns	ns	ns	ns			Os01g0289732	3.778	4.53426
Os01g0289900	-5.06523	ns	-5.52931	-6.112	ns	ns	ns	-3.27333			Os01g0289900	-4.99497	1.22505
Os01g0289950	ns	ns	ns	1.78975	ns	ns	ns	ns			Os01g0289950	1.78975	#DIV/0!
Os01g0290000	ns	ns	0.88111	-1.22914	ns	ns	1.2264	-0.759265			Os01g0290000	0.0297749	1.20611
Os01g0290100	ns	ns	0.378376	ns	ns	ns	ns	ns			Os01g0290100	0.378376	#DIV/0!
Os01g0290600	ns	ns	0.733152	0.624635	ns	0.878472	1.20427	1.11376			Os01g0290600	0.910858	0.245872
Os01g0290700	ns	ns	-0.757473	0.986047	ns	ns	-1.61841	ns			Os01g0290700	-0.463277	1.32692
Os01g0290800	ns	ns	-0.656254	0.924498	ns	ns	-1.32616	ns			Os01g0290800	-0.352638	1.15564
Os01g0290901	ns	ns	ns	1.61209	ns	ns	ns	3.07716			Os01g0290901	2.34463	1.03596
Os01g0291500	ns	-1.38033	ns	ns	ns	ns	ns	ns			Os01g0291500	-1.38033	#DIV/0!
Os01g0292200	ns	ns	ns	0.594805	ns	ns	ns	ns			Os01g0292200	0.594805	#DIV/0!
Os01g0292700	ns	ns	3.08055	-5.35063	ns	ns	1.82632	-5.81441			Os01g0292700	-1.56454	4.67157
Os01g0292900	ns	1.1957	ns	0.958086	ns	ns	ns	ns			Os01g0292900	1.07689	0.168015
Os01g0293000	0.359135	ns	ns	ns	0.599552	ns	ns	0.436574			Os01g0293000	0.465087	0.122719
Os01g0293200	ns	ns	ns	-0.605468	ns	ns	ns	ns			Os01g0293200	-0.605468	#DIV/0!
Os01g0294500	ns	1.80866	2.05639	1.19142	ns	ns	ns	ns			Os01g0294500	1.68549	0.445444
Os01g0294700	ns	ns	ns	1.63412	ns	ns	ns	1.24881			Os01g0294700	1.44147	0.272452
Os01g0295600	ns	ns	ns	-1.5832	ns	ns	ns	ns			Os01g0295600	-1.5832	#DIV/0!
Os01g0295700	ns	1.66047	0.928218	1.31656	ns	ns	ns	ns			Os01g0295700	1.30175	0.366352
Os01g0295900	ns	ns	ns	-0.654065	ns	ns	ns	-0.878183			Os01g0295900	-0.766124	0.158475
Os01g0296100	ns	ns	0.669392	ns	ns	ns	0.525197	ns			Os01g0296100	0.597295	0.101961
Os01g0296166	ns	ns	ns	1.22923	ns	ns	ns	2.69851			Os01g0296166	1.96387	1.03894
Os01g0296450	ns	ns	-0.58447	-1.99447	ns	ns	ns	-1.33055			Os01g0296450	-1.30316	0.705398
Os01g0296700	ns	ns	-0.645413	-2.07563	ns	ns	ns	-1.63196			Os01g0296700	-1.451	0.73208
Os01g0297200	ns	2.26861	1.80143	1.46212	ns	2.3867	1.9648	1.68745			Os01g0297200	1.92852	0.351768
Os01g0297700	ns	ns	3.21881	1.72223	ns	ns	2.97237	1.44537			Os01g0297700	2.33969	0.885851
Os01g0297950	ns	ns	2.99955	3.264	ns	ns	3.18595	3.48447			Os01g0297950	3.23349	0.200758
Os01g0298301	2.11271	1.31192	ns	1.71933	1.11382	ns	-1.5614	ns			Os01g0298301	0.939275	1.44984
Os01g0298400	2.37287	3.36911	ns	4.84804	ns	ns	ns	ns			Os01g0298400	3.53001	1.24541
Os01g0299100	ns	ns	ns	2.03049	ns	ns	ns	ns			Os01g0299100	2.03049	#DIV/0!
Os01g0299150	ns	ns	ns	-2.08482	ns	ns	ns	ns			Os01g0299150	-2.08482	#DIV/0!
Os01g0299200	ns	ns	ns	-1.42722	ns	ns	ns	ns			Os01g0299200	-1.42722	#DIV/0!
Os01g0299400	-0.601653	-1.01612	ns	-1.59092	ns	ns	ns	-0.895309			Os01g0299400	-1.026	0.414884
Os01g0300200	ns	ns	ns	-0.45715	ns	ns	ns	ns			Os01g0300200	-0.45715	#DIV/0!
Os01g0300600	-0.527774	-0.629752	-0.420634	-0.698153	ns	ns	ns	ns			Os01g0300600	-0.569078	0.121221
Os01g0300900	ns	ns	-0.962142	-1.04608	ns	ns	-0.846979	-0.893929			Os01g0300900	-0.937282	0.0865802
Os01g0301000	ns	ns	ns	-0.822228	ns	ns	ns	-0.602023			Os01g0301000	-0.712126	0.155709
Os01g0301100	ns	ns	-5.5076	0.99182	ns	ns	-6.95298	ns			Os01g0301100	-3.82292	4.23185
Os01g0301300	ns	ns	1.79612	0.626164	ns	ns	1.23201	ns			Os01g0301300	1.2181	0.5851
Os01g0301500	ns	3.37865	4.10647	3.10324	ns	ns	ns	ns			Os01g0301500	3.52945	0.518334
Os01g0301700	ns	-0.932896	-0.597649	-1.39215	ns	ns	ns	-0.721705			Os01g0301700	-0.911101	0.34929
Os01g0302100	ns	ns	ns	-3.42361	ns	ns	ns	ns			Os01g0302100	-3.42361	#DIV/0!
Os01g0302250	2.29058	ns	1.94134	ns	1.43242	ns	1.095	ns			Os01g0302250	1.68984	0.530484
Os01g0302500	ns	ns	-0.7509	-0.648343	ns	ns	ns	ns			Os01g0302500	-0.699621	0.0725187
Os01g0302800	ns	ns	0.575819	ns	ns	ns	1.10508	ns			Os01g0302800	0.840449	0.374244
Os01g0303000	0.514351	7.39949	9.64944	10.1368	2.93105	ns	3.40135	4.00374			Os01g0303000	5.43374	3.66046
Os01g0303200	ns	ns	0.382534	ns	ns	ns	ns	ns			Os01g0303200	0.382534	#DIV/0!
Os01g0303600	0.805333	1.5109	0.596775	ns	ns	ns	ns	-1.13804			Os01g0303600	0.443741	1.12473
Os01g0303800	1.38807	ns	0.948999	-2.02012	ns	ns	ns	ns			Os01g0303800	0.105649	1.85402
Os01g0304000	-0.574391	-1.25128	-1.00425	-0.971746	ns	-0.677916	ns	ns			Os01g0304000	-0.895915	0.271417
Os01g0304050	ns	ns	-2.596	ns	ns	ns	ns	ns			Os01g0304050	-2.596	#DIV/0!
Os01g0304300	-0.735245	ns	-1.51419	0.715561	ns	ns	-1.80734	ns			Os01g0304300	-0.835303	1.12856
Os01g0304400	ns	ns	ns	4.29557	-1.10731	ns	-0.535521	ns			Os01g0304400	0.884245	2.96809
Os01g0305200	ns	1.87895	ns	2.46135	ns	ns	-1.55589	ns			Os01g0305200	0.928137	2.17085
Os01g0305300	ns	2.72478	ns	2.6155	ns	ns	ns	ns			Os01g0305300	2.67014	0.0772704
Os01g0305900	-0.83877	ns	-1.69812	-0.700468	-1.42512	ns	-2.30322	-1.2284			Os01g0305900	-1.36568	0.588561
Os01g0306100	2.14701	ns	ns	ns	2.34033	ns	1.21823	ns			Os01g0306100	1.90186	0.599877
Os01g0306400	ns	3.60368	1.4707	3.52455	-4.47472	ns	ns	ns			Os01g0306400	1.03105	3.801
Os01g0306800	ns	ns	0.458907	ns	ns	ns	ns	ns			Os01g0306800	0.458907	#DIV/0!
Os01g0306900	0.596651	0.862904	0.942316	ns	ns	ns	ns	ns			Os01g0306900	0.800624	0.181053
Os01g0307562	ns	ns	ns	-1.0035	ns	ns	ns	ns			Os01g0307562	-1.0035	#DIV/0!
Os01g0307686	ns	ns	ns	3.21727	-3.22756	ns	-2.83536	ns			Os01g0307686	-0.948553	3.61303
Os01g0308600	0.869802	0.508765	ns	0.583904	ns	ns	ns	ns			Os01g0308600	0.654157	0.190496
Os01g0309100	ns	-1.12489	-1.5568	-0.551386	ns	ns	-1.14719	ns			Os01g0309100	-1.09507	0.413276
Os01g0309451	7.55975	6.42391	ns	7.3765	7.53234	6.31016	ns	7.40055			Os01g0309451	7.10053	0.573762
Os01g0309800	ns	ns	ns	-3.60413	ns	ns	ns	-3.52576			Os01g0309800	-3.56494	0.0554154
Os01g0309900	0.474304	1.12879	0.90874	ns	ns	0.510078	ns	ns			Os01g0309900	0.755477	0.317348
Os01g0310032	ns	ns	-1.66506	-2.09177	ns	ns	ns	-2.01764			Os01g0310032	-1.92482	0.22799
Os01g0310100	ns	ns	ns	0.298583	ns	ns	ns	ns			Os01g0310100	0.298583	#DIV/0!
Os01g0310500	-0.713007	-0.731549	-2.23082	-0.836018	ns	ns	-1.85923	ns			Os01g0310500	-1.27412	0.717424
Os01g0310550	ns	ns	-3.40699	ns	-0.977027	ns	-3.81799	ns			Os01g0310550	-2.734	1.5354
Os01g0310800	ns	ns	-0.62571	-0.338102	ns	ns	ns	ns			Os01g0310800	-0.481906	0.20337
Os01g0311300	1.37989	-6.999	-7.88262	-8.3158	9.9757	ns	ns	ns			Os01g0311300	-2.36837	7.96315
Os01g0311400	ns	ns	-1.44933	ns	ns	ns	-1.59621	ns			Os01g0311400	-1.52277	0.103864
Os01g0311500	ns	ns	ns	-0.304787	ns	ns	ns	ns			Os01g0311500	-0.304787	#DIV/0!
Os01g0311600	3.20759	ns	3.4795	ns	ns	ns	ns	ns			Os01g0311600	3.34355	0.192269
Os01g0311800	ns	1.39278	1.16732	ns	ns	ns	ns	ns			Os01g0311800	1.28005	0.159421
Os01g0312500	0.995615	ns	1.82596	-1.86396	1.17388	ns	2.00647	-1.41873			Os01g0312500	0.453208	1.67237
Os01g0312600	1.36028	1.73659	1.97995	ns	ns	ns	1.12697	-1.66036			Os01g0312600	0.908688	1.47348
Os01g0312800	ns	ns	-1.87547	-1.34585	ns	ns	-1.38419	-0.827041			Os01g0312800	-1.35814	0.428381
Os01g0313300	ns	ns	ns	-1.1348	ns	ns	ns	ns			Os01g0313300	-1.1348	#DIV/0!
Os01g0313600	4.71199	ns	2.17957	-2.60143	3.98184	ns	ns	-2.0948			Os01g0313600	1.23544	3.4034
Os01g0314000	-0.714692	ns	ns	0.998087	-0.979575	ns	ns	0.746266			Os01g0314000	0.0125214	1.0038
Os01g0314100	ns	ns	-0.410839	0.830538	-0.756639	ns	-0.817427	ns			Os01g0314100	-0.288592	0.767275
Os01g0314300	ns	-0.592872	ns	-0.903631	ns	ns	ns	-0.560916			Os01g0314300	-0.685806	0.189317
Os01g0314800	ns	4.83834	ns	6.86099	-3.29342	ns	-5.09191	ns			Os01g0314800	0.8285	5.90229
Os01g0315600	ns	ns	-1.32832	ns	ns	ns	ns	ns			Os01g0315600	-1.32832	#DIV/0!
Os01g0316100	ns	1.46162	ns	ns	-2.22899	ns	ns	ns			Os01g0316100	-0.383686	2.60966
Os01g0316500	ns	ns	ns	0.691466	ns	ns	ns	0.51723			Os01g0316500	0.604348	0.123203
Os01g0316600	ns	ns	ns	1.52351	-0.994759	ns	ns	0.877051			Os01g0316600	0.468599	1.30788
Os01g0316800	ns	ns	ns	-0.583275	ns	ns	ns	ns			Os01g0316800	-0.583275	#DIV/0!
Os01g0316900	ns	ns	0.412036	0.657565	ns	ns	ns	0.306638			Os01g0316900	0.458746	0.180066
Os01g0317125	ns	ns	ns	1.1381	ns	ns	ns	ns			Os01g0317125	1.1381	#DIV/0!
Os01g0317800	-0.402373	ns	ns	ns	-0.547098	ns	ns	ns			Os01g0317800	-0.474735	0.102336
Os01g0318202	ns	ns	0.72804	ns	ns	ns	ns	ns			Os01g0318202	0.72804	#DIV/0!
Os01g0318600	ns	ns	-0.667993	ns	ns	ns	ns	ns			Os01g0318600	-0.667993	#DIV/0!
Os01g0318700	ns	-0.493703	-0.731695	ns	ns	ns	ns	ns			Os01g0318700	-0.612699	0.168286
Os01g0319200	ns	ns	ns	-1.37774	ns	ns	ns	ns			Os01g0319200	-1.37774	#DIV/0!
Os01g0320400	ns	ns	4.84727	ns	ns	ns	4.54516	ns			Os01g0320400	4.69622	0.213629
Os01g0321300	ns	ns	0.69275	ns	ns	ns	ns	ns			Os01g0321300	0.69275	#DIV/0!
Os01g0321900	1.81077	ns	ns	2.58617	2.78171	ns	ns	3.59243			Os01g0321900	2.69277	0.7318
Os01g0322300	ns	ns	ns	ns	-2.82813	ns	ns	-1.55451			Os01g0322300	-2.19132	0.90058
Os01g0322800	ns	-0.676639	-0.315855	ns	ns	ns	ns	ns			Os01g0322800	-0.496247	0.255113
Os01g0323000	ns	ns	-0.667188	0.596433	ns	ns	-0.955774	ns			Os01g0323000	-0.342176	0.825567
Os01g0323100	ns	ns	1.08898	ns	ns	ns	1.24797	ns			Os01g0323100	1.16847	0.112418
Os01g0323300	ns	-0.971546	ns	-1.55824	ns	ns	ns	ns			Os01g0323300	-1.26489	0.414854
Os01g0323500	ns	ns	ns	5.06044	ns	ns	ns	ns			Os01g0323500	5.06044	#DIV/0!
Os01g0323600	ns	ns	ns	1.41123	ns	ns	ns	ns			Os01g0323600	1.41123	#DIV/0!
Os01g0323775	ns	ns	ns	2.04832	ns	ns	ns	ns			Os01g0323775	2.04832	#DIV/0!
Os01g0324400	0.71995	-2.11186	-1.23889	-1.53737	ns	ns	ns	ns			Os01g0324400	-1.04204	1.22926
Os01g0326000	0.40547	ns	ns	-1.37194	0.8036	ns	ns	-0.874367			Os01g0326000	-0.259308	1.03085
Os01g0326100	1.21434	ns	1.41501	1.73652	1.35208	ns	1.56564	1.90668			Os01g0326100	1.53171	0.257026
Os01g0326300	1.49837	0.992079	1.56925	1.79161	1.77653	1.2484	1.85854	2.09991			Os01g0326300	1.60434	0.356359
Os01g0327000	ns	ns	-1.06367	-1.74641	ns	ns	ns	ns			Os01g0327000	-1.40504	0.48277
Os01g0327100	ns	ns	ns	2.28796	1.95953	ns	ns	3.13143			Os01g0327100	2.45964	0.604523
Os01g0327400	ns	ns	-0.765856	ns	1.61259	ns	ns	ns			Os01g0327400	0.423366	1.68181
Os01g0327500	ns	ns	1.18026	0.589229	ns	ns	ns	ns			Os01g0327500	0.884746	0.417925
Os01g0327600	ns	ns	ns	-0.785395	ns	ns	ns	ns			Os01g0327600	-0.785395	#DIV/0!
Os01g0327900	1.04137	0.891903	ns	1.10561	1.34327	1.164	ns	1.44913			Os01g0327900	1.16588	0.202929
Os01g0328300	1.46524	1.38721	ns	1.69285	1.63142	1.5432	ns	1.90716			Os01g0328300	1.60451	0.18466
Os01g0328400	ns	-0.938619	-0.625376	-1.03062	ns	ns	ns	ns			Os01g0328400	-0.864873	0.212451
Os01g0328600	ns	ns	ns	-0.71974	ns	ns	ns	-0.748856			Os01g0328600	-0.734298	0.0205879
Os01g0328700	ns	ns	ns	1.29813	ns	ns	ns	1.09287			Os01g0328700	1.1955	0.145142
Os01g0328900	ns	ns	0.34027	-0.594499	ns	ns	ns	ns			Os01g0328900	-0.127114	0.660981
Os01g0329300	ns	-2.52589	ns	-1.05455	ns	ns	ns	ns			Os01g0329300	-1.79022	1.0404
Os01g0329400	ns	ns	-0.973093	2.04049	-1.80647	ns	-2.58166	ns			Os01g0329400	-0.830185	2.02336
Os01g0329800	-1.56461	ns	-0.586072	1.16462	-2.30176	ns	-1.26809	ns			Os01g0329800	-0.911184	1.31365
Os01g0329900	ns	ns	-0.909972	1.78864	ns	ns	-1.37064	ns			Os01g0329900	-0.163992	1.70664
Os01g0330100	ns	ns	-0.790838	-0.651748	ns	ns	-1.04781	-0.876393			Os01g0330100	-0.841698	0.165685
Os01g0331100	ns	ns	ns	1.96597	ns	ns	ns	1.8877			Os01g0331100	1.92684	0.0553448
Os01g0331900	ns	ns	0.319233	ns	ns	ns	ns	ns			Os01g0331900	0.319233	#DIV/0!
Os01g0332100	0.532008	1.20473	ns	0.836889	ns	ns	ns	ns			Os01g0332100	0.857877	0.336853
Os01g0332150	ns	1.66167	ns	ns	ns	ns	ns	ns			Os01g0332150	1.66167	#DIV/0!
Os01g0332500	ns	-1.54022	ns	-1.79079	ns	-1.07855	ns	-1.3497			Os01g0332500	-1.43981	0.301051
Os01g0332800	ns	ns	ns	-2.17683	ns	ns	ns	ns			Os01g0332800	-2.17683	#DIV/0!
Os01g0332900	ns	ns	ns	ns	ns	ns	2.61566	ns			Os01g0332900	2.61566	#DIV/0!
Os01g0333001	ns	ns	ns	1.20107	ns	ns	ns	1.35942			Os01g0333001	1.28024	0.111972
Os01g0333600	ns	ns	ns	1.45261	1.57131	ns	ns	1.99738			Os01g0333600	1.67377	0.286473
Os01g0337500	-2.94907	-1.9122	-2.60926	-0.868279	-3.6444	-2.60054	-3.282	-1.46608			Os01g0337500	-2.41648	0.938546
Os01g0337700	ns	ns	1.0775	ns	ns	ns	ns	ns			Os01g0337700	1.0775	#DIV/0!
Os01g0337900	-0.430945	ns	-0.309702	-0.474822	ns	ns	ns	ns			Os01g0337900	-0.405156	0.0855273
Os01g0338000	-0.427874	-0.722404	ns	ns	ns	ns	ns	ns			Os01g0338000	-0.575139	0.208264
Os01g0338200	ns	ns	ns	1.18294	ns	ns	ns	0.790293			Os01g0338200	0.986619	0.277646
Os01g0338600	ns	0.875459	ns	0.651838	ns	ns	ns	ns			Os01g0338600	0.763648	0.158124
Os01g0339500	ns	ns	ns	ns	1.77018	ns	ns	ns			Os01g0339500	1.77018	#DIV/0!
Os01g0339600	ns	1.50029	ns	-0.642299	ns	ns	ns	-1.51832			Os01g0339600	-0.220111	1.55296
Os01g0339900	-0.445866	ns	ns	-1.1152	ns	ns	ns	ns			Os01g0339900	-0.780535	0.473294
Os01g0339950	ns	ns	ns	-0.878948	ns	ns	ns	ns			Os01g0339950	-0.878948	#DIV/0!
Os01g0341000	1.74413	ns	-0.803065	1.20713	2.4661	1.09373	ns	1.94257			Os01g0341000	1.2751	1.13492
Os01g0341750	ns	ns	0.744089	-1.97688	ns	ns	ns	-2.44159			Os01g0341750	-1.2248	1.72086
Os01g0342800	ns	ns	ns	-1.2863	ns	ns	ns	-0.992265			Os01g0342800	-1.13928	0.207913
Os01g0342900	ns	ns	1.29179	-1.92122	ns	ns	ns	-1.79982			Os01g0342900	-0.80975	1.821
Os01g0343200	-0.691154	-1.36766	-1.3986	0.548238	ns	-1.19451	-1.38149	ns			Os01g0343200	-0.914197	0.764942
Os01g0343300	ns	ns	ns	1.89481	ns	ns	ns	1.19948			Os01g0343300	1.54714	0.491672
Os01g0343500	1.3243	ns	ns	ns	1.61429	ns	ns	ns			Os01g0343500	1.4693	0.205057
Os01g0346250	1.67966	1.65427	1.44215	ns	ns	ns	ns	ns			Os01g0346250	1.59202	0.130419
Os01g0347100	0.29616	0.777883	ns	0.729714	ns	ns	ns	0.57469			Os01g0347100	0.594611	0.217034
Os01g0347200	ns	ns	ns	ns	ns	2.27564	ns	1.4656			Os01g0347200	1.87062	0.572788
Os01g0347300	-5.35392	ns	ns	-1.55892	ns	ns	ns	ns			Os01g0347300	-3.45642	2.68347
Os01g0347500	ns	1.76112	2.03919	2.66508	2.27548	2.68732	2.85686	3.47409			Os01g0347500	2.53702	0.56828
Os01g0347600	ns	ns	2.05094	ns	ns	ns	3.42431	2.54484			Os01g0347600	2.67336	0.695646
Os01g0348000	ns	ns	ns	ns	ns	ns	4.75233	2.18815			Os01g0348000	3.47024	1.81315
Os01g0348600	ns	ns	-0.768303	ns	ns	ns	ns	ns			Os01g0348600	-0.768303	#DIV/0!
Os01g0348700	-0.406701	-0.981191	ns	-1.26618	ns	ns	ns	-0.880818			Os01g0348700	-0.883722	0.357459
Os01g0348800	1.45043	0.961394	ns	ns	2.05766	1.57296	1.03264	ns			Os01g0348800	1.41502	0.44474
Os01g0348900	ns	ns	ns	-0.697404	ns	ns	ns	ns			Os01g0348900	-0.697404	#DIV/0!
Os01g0349400	ns	ns	ns	1.26153	ns	ns	ns	ns			Os01g0349400	1.26153	#DIV/0!
Os01g0349800	ns	ns	ns	ns	ns	ns	ns	-2.44494			Os01g0349800	-2.44494	#DIV/0!
Os01g0350900	ns	ns	0.309763	0.977737	ns	ns	ns	0.886159			Os01g0350900	0.724553	0.362125
Os01g0351100	1.75992	1.54616	ns	1.326	1.86663	1.63967	ns	1.46223			Os01g0351100	1.6001	0.197581
Os01g0351200	-0.723058	-1.60148	-1.15117	-1.97444	ns	ns	ns	-0.972684			Os01g0351200	-1.28457	0.501675
Os01g0351300	ns	ns	ns	0.786258	ns	ns	ns	ns			Os01g0351300	0.786258	#DIV/0!
Os01g0351800	ns	-0.526659	ns	ns	ns	-0.613273	ns	ns			Os01g0351800	-0.569966	0.0612455
Os01g0352100	6.83428	6.99072	ns	6.52438	6.80328	6.8931	ns	6.57604			Os01g0352100	6.7703	0.182788
Os01g0353633	ns	1.099	ns	ns	ns	ns	ns	ns			Os01g0353633	1.099	#DIV/0!
Os01g0353900	2.48243	-6.00292	ns	-7.4647	2.42849	-6.11994	ns	-7.53243			Os01g0353900	-3.70151	4.8125
Os01g0354200	-1.47893	-1.01563	-0.466163	-1.90788	-1.18582	ns	ns	-1.58796			Os01g0354200	-1.27373	0.503885
Os01g0354700	ns	-1.46532	ns	-1.85067	ns	ns	ns	-1.08257			Os01g0354700	-1.46619	0.384053
Os01g0355250	-2.59181	ns	ns	-4.26222	ns	ns	ns	-3.41908			Os01g0355250	-3.42437	0.835217
Os01g0355500	ns	ns	ns	0.738175	ns	ns	ns	ns			Os01g0355500	0.738175	#DIV/0!
Os01g0355600	ns	ns	0.446954	ns	ns	ns	ns	ns			Os01g0355600	0.446954	#DIV/0!
Os01g0355900	ns	ns	ns	0.617679	ns	ns	ns	0.39189			Os01g0355900	0.504785	0.159657
Os01g0356400	-0.64171	-0.756261	-0.995085	-0.416669	ns	ns	ns	ns			Os01g0356400	-0.702432	0.240757
Os01g0356500	ns	ns	0.450956	0.374371	ns	ns	ns	ns			Os01g0356500	0.412664	0.0541537
Os01g0356800	2.47835	ns	4.48276	ns	ns	ns	3.97734	ns			Os01g0356800	3.64615	1.04244
Os01g0356900	ns	-3.40112	-1.49796	-2.56587	ns	-3.00183	ns	-2.29742			Os01g0356900	-2.55284	0.724458
Os01g0357150	ns	ns	ns	-5.03203	ns	ns	ns	ns			Os01g0357150	-5.03203	#DIV/0!
Os01g0357200	ns	ns	1.70795	ns	ns	ns	2.65687	1.27175			Os01g0357200	1.87886	0.7082
Os01g0357400	ns	0.743876	ns	ns	ns	ns	ns	-0.554391			Os01g0357400	0.0947427	0.918014
Os01g0357500	ns	2.07163	ns	1.57457	ns	1.70583	ns	1.41204			Os01g0357500	1.69102	0.280757
Os01g0357800	-0.498119	ns	ns	-1.08282	ns	ns	ns	ns			Os01g0357800	-0.790467	0.413443
Os01g0357900	0.804775	1.27798	0.672673	1.55982	ns	ns	ns	0.934693			Os01g0357900	1.04999	0.363215
Os01g0358100	ns	ns	0.830069	2.06195	ns	ns	ns	1.52331			Os01g0358100	1.47178	0.617554
Os01g0358300	1.31983	1.10264	2.01242	1.53828	1.27707	ns	1.9866	1.52007			Os01g0358300	1.5367	0.349249
Os01g0358400	ns	-0.576552	ns	-0.850741	ns	ns	ns	ns			Os01g0358400	-0.713647	0.193881
Os01g0358551	ns	ns	-0.879	ns	ns	ns	ns	ns			Os01g0358551	-0.879	#DIV/0!
Os01g0358700	ns	ns	ns	2.07028	ns	ns	ns	1.96661			Os01g0358700	2.01845	0.073305
Os01g0359400	ns	4.6754	2.26693	-5.11513	-3.32815	3.64912	1.27364	-6.80128			Os01g0359400	-0.482781	4.54246
Os01g0359600	8.74754	6.40515	ns	9.19013	8.71838	6.28988	ns	9.22259			Os01g0359600	8.09561	1.37107
Os01g0359800	12.7737	12.3084	0.580376	11.9353	12.7528	12.2723	ns	11.9685			Os01g0359800	10.6559	4.45537
Os01g0360100	8.31791	8.7495	ns	7.28732	8.28714	8.7126	ns	7.33319			Os01g0360100	8.11461	0.652199
Os01g0360150	ns	ns	ns	3.40858	ns	ns	ns	3.76786			Os01g0360150	3.58822	0.254053
Os01g0360200	-0.898711	-1.51697	-1.97831	-1.68843	ns	ns	-0.741012	ns			Os01g0360200	-1.36469	0.526934
Os01g0360333	-2.14422	ns	-1.81231	-1.25668	ns	ns	ns	ns			Os01g0360333	-1.73774	0.448444
Os01g0360600	0.405559	ns	ns	0.272052	0.627581	ns	ns	0.526987			Os01g0360600	0.458045	0.15367
Os01g0361000	9.45209	ns	ns	10.1592	10.9374	ns	3.16583	11.7496			Os01g0361000	9.09284	3.42259
Os01g0361500	2.89237	ns	ns	ns	4.36649	ns	2.46108	ns			Os01g0361500	3.23998	0.999135
Os01g0361800	ns	ns	ns	-0.96842	ns	ns	ns	ns			Os01g0361800	-0.96842	#DIV/0!
Os01g0362000	ns	ns	0.624611	ns	ns	ns	ns	ns			Os01g0362000	0.624611	#DIV/0!
Os01g0362100	0.488703	-1.13978	-0.843988	-1.63291	0.90213	ns	ns	-1.09635			Os01g0362100	-0.553699	1.00925
Os01g0362400	13.0113	ns	ns	12.3245	10.5434	ns	ns	9.9477			Os01g0362400	11.4567	1.44696
Os01g0362800	7.67462	ns	ns	ns	5.65607	ns	ns	ns			Os01g0362800	6.66535	1.42733
Os01g0363300	1.4791	ns	ns	2.53996	1.17065	ns	ns	2.24979			Os01g0363300	1.85988	0.641505
Os01g0363500	ns	-4.95215	0.475147	-0.327837	ns	-5.11165	ns	-0.490338			Os01g0363500	-2.08136	2.71873
Os01g0363600	ns	ns	ns	ns	0.896537	ns	ns	ns			Os01g0363600	0.896537	#DIV/0!
Os01g0363900	ns	ns	ns	0.857235	ns	ns	-0.955647	ns			Os01g0363900	-0.0492059	1.2819
Os01g0364100	0.798982	1.98944	ns	1.11502	ns	1.19198	ns	ns			Os01g0364100	1.27386	0.506458
Os01g0364450	-8.91854	ns	1.15456	-12.9513	-8.34157	ns	1.55762	-12.288			Os01g0364450	-6.6312	6.44632
Os01g0364800	-7.06322	-6.67499	ns	-11.4819	-6.98277	-6.53837	ns	-11.3505			Os01g0364800	-8.34862	2.3843
Os01g0364900	1.85328	ns	ns	ns	3.77267	ns	ns	2.45947			Os01g0364900	2.69514	0.981158
Os01g0366100	11.2914	ns	ns	12.2362	11.2723	ns	ns	12.2639			Os01g0366100	11.766	0.559156
Os01g0366300	9.56837	ns	ns	10.1638	9.5453	ns	ns	10.1902			Os01g0366300	9.86692	0.358344
Os01g0367100	0.47721	ns	ns	ns	0.81309	ns	ns	ns			Os01g0367100	0.64515	0.237503
Os01g0367201	1.52933	ns	ns	2.25024	ns	ns	ns	1.69533			Os01g0367201	1.82497	0.377534
Os01g0367300	ns	-0.61191	ns	0.74855	ns	ns	ns	ns			Os01g0367300	0.0683203	0.961991
Os01g0367400	1.32143	ns	1.33929	1.35597	ns	ns	ns	1.03161			Os01g0367400	1.26208	0.15429
Os01g0367700	0.622427	ns	0.385145	1.17711	ns	ns	ns	0.921991			Os01g0367700	0.776668	0.345712
Os01g0367900	ns	-0.929898	-0.949211	ns	ns	ns	ns	0.492559			Os01g0367900	-0.462183	0.826888
Os01g0368900	1.2424	ns	1.20688	-2.31541	ns	ns	ns	ns			Os01g0368900	0.0446232	2.04392
Os01g0369000	ns	ns	0.405094	ns	ns	ns	ns	ns			Os01g0369000	0.405094	#DIV/0!
Os01g0369200	ns	-1.54208	ns	-1.37676	ns	ns	ns	ns			Os01g0369200	-1.45942	0.116898
Os01g0369500	ns	5.04024	ns	ns	ns	ns	ns	ns			Os01g0369500	5.04024	#DIV/0!
Os01g0369600	5.11755	ns	ns	11.7362	5.06314	ns	ns	11.7586			Os01g0369600	8.41887	3.84353
Os01g0369700	-1.0703	ns	-1.29929	1.9796	-2.25149	ns	-2.50242	ns			Os01g0369700	-1.02878	1.78829
Os01g0369800	ns	2.39906	ns	2.41089	ns	ns	ns	ns			Os01g0369800	2.40497	0.0083681
Os01g0369900	-1.0111	ns	ns	ns	-3.14771	ns	-2.51531	ns			Os01g0369900	-2.22471	1.09755
Os01g0369950	ns	ns	ns	ns	-2.9384	ns	-2.58018	-3.86711			Os01g0369950	-3.12856	0.664201
Os01g0370000	ns	ns	ns	4.83531	ns	ns	-3.25156	2.09552			Os01g0370000	1.22643	4.11289
Os01g0370200	-0.78685	-1.5727	ns	-4.13261	ns	-1.44572	ns	-4.05395			Os01g0370200	-2.39837	1.57598
Os01g0370400	ns	-1.3364	ns	-3.4984	ns	-1.57169	ns	-3.72097			Os01g0370400	-2.53186	1.25156
Os01g0370750	7.44749	ns	ns	10.7993	7.3827	ns	ns	10.8174			Os01g0370750	9.11172	1.95928
Os01g0370900	5.77052	ns	ns	8.85553	5.72709	ns	ns	8.89009			Os01g0370900	7.3108	1.80379
Os01g0371200	-3.41294	-4.28452	0.555555	-3.61729	-3.81573	-4.71992	ns	-3.96275			Os01g0371200	-3.32251	1.7638
Os01g0371300	-1.47184	-1.79638	ns	-3.36218	ns	ns	ns	-3.7494			Os01g0371300	-2.59495	1.12849
Os01g0371400	-5.97443	-5.37088	ns	-6.89107	-5.25768	-4.48688	ns	-6.22729			Os01g0371400	-5.70137	0.84233
Os01g0371500	ns	-2.62338	1.31912	-1.27513	ns	ns	1.95627	ns			Os01g0371500	-0.155779	2.15855
Os01g0372100	ns	3.56779	ns	ns	ns	2.53501	ns	ns			Os01g0372100	3.0514	0.730287
Os01g0372350	4.23746	5.10335	ns	3.8475	3.97024	4.87825	ns	3.56961			Os01g0372350	4.26774	0.604051
Os01g0372400	-6.19645	-5.65981	ns	-1.25547	-7.57101	-7.04193	ns	-2.30402			Os01g0372400	-5.00478	2.60523
Os01g0372700	-0.776778	-1.04499	-0.579363	-0.477372	ns	ns	ns	ns			Os01g0372700	-0.719626	0.249993
Os01g0372866	-1.36592	ns	ns	ns	ns	ns	ns	ns			Os01g0372866	-1.36592	#DIV/0!
Os01g0373400	ns	ns	ns	2.16804	ns	ns	ns	ns			Os01g0373400	2.16804	#DIV/0!
Os01g0373700	ns	2.84846	ns	2.20688	ns	ns	-2.21547	ns			Os01g0373700	0.946621	2.75718
Os01g0373800	ns	1.72403	ns	ns	-1.57271	ns	ns	-1.33054			Os01g0373800	-0.393073	1.83745
Os01g0374200	ns	ns	ns	-0.909715	ns	ns	ns	-1.03073			Os01g0374200	-0.970224	0.085572
Os01g0374900	0.827815	ns	0.728312	ns	0.596352	ns	ns	ns			Os01g0374900	0.717493	0.11611
Os01g0375000	-0.780507	-0.718786	-0.406253	-0.302642	-0.553899	-0.484556	ns	ns			Os01g0375000	-0.541107	0.182918
Os01g0375100	ns	ns	0.599213	ns	ns	ns	ns	ns			Os01g0375100	0.599213	#DIV/0!
Os01g0375200	ns	-0.396303	-0.436268	0.581988	ns	ns	-0.570815	0.466645			Os01g0375200	-0.0709507	0.548752
Os01g0375500	-1.36697	-1.66125	-1.16423	0.73532	-1.95303	-2.26204	-1.7587	ns			Os01g0375500	-1.34727	0.986803
Os01g0376200	ns	-1.01918	ns	ns	ns	ns	ns	ns			Os01g0376200	-1.01918	#DIV/0!
Os01g0376600	-3.77717	ns	-4.29548	1.46753	-5.96191	ns	-6.38215	ns			Os01g0376600	-3.78984	3.13583
Os01g0377000	1.11505	ns	ns	-2.05627	1.5864	ns	ns	-1.5134			Os01g0377000	-0.217056	1.83396
Os01g0377500	ns	ns	ns	0.556861	ns	ns	ns	0.440963			Os01g0377500	0.498912	0.0819518
Os01g0377700	ns	ns	ns	1.30179	ns	ns	ns	0.891401			Os01g0377700	1.0966	0.290191
Os01g0378100	ns	ns	ns	0.677753	ns	ns	ns	1.01126			Os01g0378100	0.844507	0.235825
Os01g0379101	-1.93162	ns	-1.54058	ns	ns	ns	ns	1.39948			Os01g0379101	-0.690905	1.82085
Os01g0379400	-0.562593	ns	0.552472	-0.600143	-0.760196	ns	ns	-0.759356			Os01g0379400	-0.425963	0.554348
Os01g0380800	-0.64865	-0.834742	ns	-3.20561	ns	ns	0.703516	-2.81269			Os01g0380800	-1.35963	1.62455
Os01g0382200	ns	ns	ns	10.6618	ns	ns	ns	10.6719			Os01g0382200	10.6669	0.00713359
Os01g0382400	ns	ns	ns	ns	ns	ns	ns	3.76472			Os01g0382400	3.76472	#DIV/0!
Os01g0382450	ns	ns	ns	ns	ns	ns	ns	2.01113			Os01g0382450	2.01113	#DIV/0!
Os01g0382700	1.30973	ns	1.85294	1.01174	1.27244	ns	1.80616	1.00922			Os01g0382700	1.37704	0.372785
Os01g0382900	ns	ns	ns	5.11602	ns	ns	ns	5.22231			Os01g0382900	5.16917	0.0751622
Os01g0383001	ns	ns	ns	4.76598	ns	ns	ns	4.6975			Os01g0383001	4.73174	0.0484185
Os01g0383100	ns	ns	ns	8.63389	ns	ns	ns	3.30249			Os01g0383100	5.96819	3.76987
Os01g0383700	-0.942852	ns	-1.37325	1.59139	-2.25611	ns	-2.70026	ns			Os01g0383700	-1.13622	1.67584
Os01g0383900	ns	ns	ns	0.963992	ns	ns	ns	ns			Os01g0383900	0.963992	#DIV/0!
Os01g0384300	ns	ns	ns	0.460869	ns	ns	ns	ns			Os01g0384300	0.460869	#DIV/0!
Os01g0384800	1.2298	1.72866	1.18043	1.57589	ns	ns	ns	ns			Os01g0384800	1.4287	0.266355
Os01g0385000	ns	ns	3.96576	ns	ns	ns	1.21587	ns			Os01g0385000	2.59082	1.94447
Os01g0385400	ns	1.99793	-1.90548	3.06488	ns	ns	-4.11204	ns			Os01g0385400	-0.238679	3.35147
Os01g0386500	ns	ns	3.25726	5.46465	-6.65405	-4.2025	ns	2.28436			Os01g0386500	0.0299433	5.18708
Os01g0386600	-7.28883	-6.80178	1.49173	ns	-8.23739	-7.68683	ns	ns			Os01g0386600	-5.70462	4.05725
Os01g0387566	-1.93108	ns	-0.72368	-2.92087	-1.60596	ns	ns	-2.56413			Os01g0387566	-1.94915	0.857662
Os01g0387865	ns	0.34865	ns	3.04908	ns	ns	ns	ns			Os01g0387865	1.69886	1.90949
Os01g0388000	ns	3.21257	0.880909	0.734121	ns	ns	ns	ns			Os01g0388000	1.6092	1.3905
Os01g0388101	ns	5.51007	ns	ns	ns	ns	ns	ns			Os01g0388101	5.51007	#DIV/0!
Os01g0388200	ns	ns	ns	-0.531458	ns	ns	ns	ns			Os01g0388200	-0.531458	#DIV/0!
Os01g0388500	ns	ns	ns	-0.838753	ns	ns	ns	ns			Os01g0388500	-0.838753	#DIV/0!
Os01g0389200	ns	2.83238	ns	2.07117	ns	ns	-1.81498	ns			Os01g0389200	1.02952	2.49264
Os01g0390300	-2.04431	-1.5215	ns	1.2782	-2.52437	-1.98873	ns	0.830874			Os01g0390300	-0.994971	1.62518
Os01g0390900	ns	-0.614646	-0.596098	-0.429472	ns	ns	-0.662588	ns			Os01g0390900	-0.575701	0.101431
Os01g0391100	ns	ns	ns	-0.522599	ns	ns	ns	ns			Os01g0391100	-0.522599	#DIV/0!
Os01g0391500	-0.497969	-0.604406	ns	-0.594028	ns	ns	ns	ns			Os01g0391500	-0.565468	0.0586854
Os01g0391800	6.92164	6.19263	ns	7.50864	6.8915	6.10085	ns	7.54469			Os01g0391800	6.85999	0.619035
Os01g0392100	ns	ns	ns	0.692801	ns	ns	ns	0.525162			Os01g0392100	0.608982	0.118539
Os01g0392600	ns	ns	ns	3.47356	ns	ns	ns	2.20397			Os01g0392600	2.83876	0.897734
Os01g0392800	ns	-1.12762	ns	0.668885	ns	ns	ns	0.922174			Os01g0392800	0.154481	1.11753
Os01g0393000	0.471942	ns	0.55059	-0.694491	ns	ns	ns	-0.754019			Os01g0393000	-0.106494	0.714464
Os01g0393100	7.60916	ns	6.52595	8.09435	ns	ns	ns	2.20553			Os01g0393100	6.10875	2.68347
Os01g0495701	ns	1.94298	ns	2.77509	ns	ns	ns	ns			Os01g0495701	2.35904	0.588385
Os01g0495900	0.90378	ns	0.664297	ns	ns	ns	ns	ns			Os01g0495900	0.784038	0.16934
Os01g0496900	ns	ns	-0.440092	0.929143	ns	ns	ns	1.03517			Os01g0496900	0.508073	0.822844
Os01g0498200	0.602188	0.934261	0.797714	1.26718	ns	ns	ns	0.583439			Os01g0498200	0.836956	0.28084
Os01g0498300	1.40384	2.26282	1.37103	1.61375	ns	ns	ns	ns			Os01g0498300	1.66286	0.414176
Os01g0498802	1.27708	ns	-1.12661	3.07921	ns	ns	-1.90975	2.29219			Os01g0498802	0.722425	2.16064
Os01g0500400	ns	ns	ns	0.994579	ns	ns	ns	ns			Os01g0500400	0.994579	#DIV/0!
Os01g0500500	ns	0.536503	0.374869	0.753588	ns	0.461506	ns	0.741831			Os01g0500500	0.573659	0.168917
Os01g0500900	ns	ns	ns	0.772795	ns	ns	ns	ns			Os01g0500900	0.772795	#DIV/0!
Os01g0501000	ns	-1.06446	-0.51935	-0.446701	ns	ns	ns	ns			Os01g0501000	-0.676837	0.33765
Os01g0501700	1.00207	ns	1.06415	ns	1.0209	ns	1.08209	ns			Os01g0501700	1.04231	0.0371328
Os01g0501800	5.16462	2.33058	4.87853	3.82866	5.48935	2.55573	5.16423	4.05569			Os01g0501800	4.18342	1.21526
Os01g0502400	ns	-0.708409	ns	-0.522521	ns	ns	ns	ns			Os01g0502400	-0.615465	0.131443
Os01g0502700	ns	-1.51845	-0.709134	-1.32562	ns	ns	ns	ns			Os01g0502700	-1.1844	0.422735
Os01g0502800	-0.773193	ns	ns	0.806771	ns	ns	ns	1.08363			Os01g0502800	0.372402	1.00173
Os01g0503400	1.39216	ns	0.96228	ns	1.04158	-0.964018	ns	ns			Os01g0503400	0.608	1.06453
Os01g0504100	ns	ns	ns	-1.23006	ns	ns	ns	ns			Os01g0504100	-1.23006	#DIV/0!
Os01g0504500	-1.25469	ns	-0.646778	1.02596	-1.8988	ns	-1.27442	ns			Os01g0504500	-0.809744	1.11762
Os01g0504950	ns	1.83023	ns	ns	-1.56661	ns	ns	ns			Os01g0504950	0.131812	2.40193
Os01g0505400	0.437314	1.08585	ns	1.38104	ns	ns	ns	ns			Os01g0505400	0.968068	0.482763
Os01g0505500	ns	ns	ns	-0.628845	ns	ns	ns	ns			Os01g0505500	-0.628845	#DIV/0!
Os01g0505600	ns	ns	ns	0.987271	ns	ns	ns	0.92024			Os01g0505600	0.953755	0.0473983
Os01g0505700	-0.848257	-1.44065	-0.7021	ns	ns	-1.12464	ns	ns			Os01g0505700	-1.02891	0.325645
Os01g0506100	-0.373487	-0.408746	ns	-0.627112	-0.456549	ns	ns	-0.664156			Os01g0506100	-0.50601	0.131477
Os01g0506200	ns	ns	ns	-0.607215	ns	ns	ns	-0.579687			Os01g0506200	-0.593451	0.0194653
Os01g0507000	ns	ns	ns	ns	-0.498759	ns	-0.367817	-0.515713			Os01g0507000	-0.460763	0.0809385
Os01g0507300	ns	ns	-1.25137	ns	ns	ns	-1.13498	ns			Os01g0507300	-1.19317	0.0822962
Os01g0507500	0.468324	0.486526	0.925808	0.342561	ns	ns	0.606585	ns			Os01g0507500	0.565961	0.221862
Os01g0507700	ns	ns	-1.09271	ns	ns	ns	ns	ns			Os01g0507700	-1.09271	#DIV/0!
Os01g0507900	ns	ns	ns	-0.621486	ns	ns	ns	-0.449146			Os01g0507900	-0.535316	0.121863
Os01g0508000	ns	ns	ns	-1.93099	ns	ns	ns	-1.66542			Os01g0508000	-1.79821	0.187781
Os01g0508100	ns	1.13185	ns	0.680114	-1.4828	ns	-2.07344	ns			Os01g0508100	-0.436068	1.57912
Os01g0508300	-8.65227	-8.21746	-0.862709	1.70634	-9.60834	-9.1608	-1.64121	0.885327			Os01g0508300	-4.44389	4.89572
Os01g0508500	5.34825	3.66574	ns	7.50702	3.14832	ns	ns	5.41481			Os01g0508500	5.01683	1.71654
Os01g0509400	ns	ns	-0.975076	-1.10307	ns	ns	-1.54505	-1.61709			Os01g0509400	-1.31007	0.318615
Os01g0509700	ns	ns	ns	3.49759	ns	ns	ns	6.25282			Os01g0509700	4.8752	1.94824
Os01g0509900	ns	-0.735126	-0.810633	-1.31883	ns	-0.805159	-0.906052	-1.38501			Os01g0509900	-0.993468	0.283703
Os01g0510100	ns	ns	ns	0.647569	ns	ns	ns	ns			Os01g0510100	0.647569	#DIV/0!
Os01g0510200	ns	2.71835	ns	5.41193	ns	ns	-4.78935	ns			Os01g0510200	1.11364	5.28657
Os01g0510600	1.6473	1.0651	2.22569	1.52631	1.29374	0.696208	1.86809	1.21553			Os01g0510600	1.44224	0.48055
Os01g0510901	1.14123	2.14356	ns	ns	1.28494	2.22478	ns	ns			Os01g0510901	1.69863	0.56469
Os01g0511100	0.996022	1.54524	ns	2.42853	ns	ns	-1.21592	ns			Os01g0511100	0.938471	1.55276
Os01g0511200	ns	ns	ns	-0.428614	ns	ns	ns	ns			Os01g0511200	-0.428614	#DIV/0!
Os01g0511600	-2.37262	-3.41268	-0.859807	-3.14865	-2.62793	-3.66788	-1.10552	-3.33603			Os01g0511600	-2.56639	1.06562
Os01g0511700	10.846	11.7568	ns	10.6367	10.8177	11.7093	ns	10.666			Os01g0511700	11.0721	0.518678
Os01g0511800	0.724272	1.08584	ns	ns	0.901581	1.18745	ns	ns			Os01g0511800	0.974787	0.204675
Os01g0512200	-0.249725	ns	ns	ns	-0.292381	ns	ns	ns			Os01g0512200	-0.271053	0.0301619
Os01g0512400	ns	ns	ns	-0.873897	ns	ns	ns	-1.54581			Os01g0512400	-1.20985	0.475113
Os01g0513100	ns	ns	ns	0.333393	ns	ns	ns	ns			Os01g0513100	0.333393	#DIV/0!
Os01g0513200	ns	ns	-0.411537	0.714019	ns	ns	ns	ns			Os01g0513200	0.151241	0.795888
Os01g0513400	0.331172	1.7909	0.449387	1.66996	ns	ns	ns	ns			Os01g0513400	1.06036	0.776813
Os01g0513500	-1.40704	-2.25821	-1.08791	-2.68171	ns	-1.47518	ns	-1.943			Os01g0513500	-1.80884	0.595707
Os01g0513700	ns	ns	ns	-0.350743	ns	ns	ns	ns			Os01g0513700	-0.350743	#DIV/0!
Os01g0513800	-0.786319	-1.00733	-0.454085	-0.701914	-0.510108	-0.709143	ns	ns			Os01g0513800	-0.694817	0.19918
Os01g0513900	ns	-2.36647	-2.35969	-2.6785	ns	ns	-1.20474	-1.48094			Os01g0513900	-2.01807	0.637232
Os01g0514000	ns	ns	0.507049	-0.90621	ns	ns	ns	-0.822249			Os01g0514000	-0.407137	0.79282
Os01g0514300	-0.494422	ns	ns	-0.322588	-0.403756	ns	ns	ns			Os01g0514300	-0.406922	0.0859606
Os01g0514600	ns	ns	0.604639	-0.562125	ns	ns	0.883305	ns			Os01g0514600	0.308606	0.76684
Os01g0514700	0.542381	0.884065	0.686432	ns	ns	ns	ns	ns			Os01g0514700	0.704293	0.17154
Os01g0516600	ns	-1.03667	-0.732602	-0.442736	ns	-1.04946	-0.739516	ns			Os01g0516600	-0.800195	0.252031
Os01g0516700	ns	ns	ns	-0.486835	ns	ns	ns	-0.671386			Os01g0516700	-0.579111	0.130497
Os01g0516900	1.3632	ns	ns	ns	ns	ns	ns	ns			Os01g0516900	1.3632	#DIV/0!
Os01g0517900	ns	4.47042	ns	3.64138	ns	ns	ns	ns			Os01g0517900	4.0559	0.586219
Os01g0518400	ns	ns	ns	ns	-1.59582	ns	ns	ns			Os01g0518400	-1.59582	#DIV/0!
Os01g0518500	ns	ns	ns	-1.06363	ns	ns	ns	-0.864544			Os01g0518500	-0.964089	0.140778
Os01g0518651	ns	ns	-1.31765	ns	ns	ns	ns	ns			Os01g0518651	-1.31765	#DIV/0!
Os01g0518800	ns	ns	ns	12.7982	ns	ns	ns	12.8423			Os01g0518800	12.8202	0.0311611
Os01g0519050	2.59296	ns	2.48106	ns	2.03489	ns	1.89951	ns			Os01g0519050	2.2521	0.336705
Os01g0519700	1.33606	ns	ns	0.755214	0.890233	ns	ns	ns			Os01g0519700	0.993836	0.303967
Os01g0520600	ns	0.725636	0.853788	0.416077	ns	ns	ns	ns			Os01g0520600	0.665167	0.225034
Os01g0520800	7.08093	ns	ns	7.8081	7.04518	ns	ns	7.84143			Os01g0520800	7.44391	0.440226
Os01g0521200	12.1254	ns	ns	10.6035	12.1119	ns	ns	10.6286			Os01g0521200	11.3673	0.867607
Os01g0521400	0.429166	0.708787	0.787128	ns	ns	ns	0.518366	ns			Os01g0521400	0.610862	0.165558
Os01g0521500	ns	ns	0.413294	ns	ns	ns	ns	ns			Os01g0521500	0.413294	#DIV/0!
Os01g0521600	ns	ns	1.67563	ns	ns	ns	ns	ns			Os01g0521600	1.67563	#DIV/0!
Os01g0522100	3.46373	ns	ns	2.66965	ns	ns	ns	ns			Os01g0522100	3.06669	0.5615
Os01g0522400	3.31962	ns	ns	ns	4.78803	ns	1.52714	2.04612			Os01g0522400	2.92023	1.45522
Os01g0523000	12.6006	ns	ns	11.6353	12.5728	ns	ns	11.665			Os01g0523000	12.1184	0.54098
Os01g0524251	ns	ns	-1.089	2.56423	ns	ns	-1.8037	1.8701			Os01g0524251	0.385407	2.15388
Os01g0524500	2.44168	ns	2.22991	-0.580253	2.65703	ns	2.42856	ns			Os01g0524500	1.83538	1.35881
Os01g0524700	ns	ns	ns	0.549343	ns	ns	ns	0.733302			Os01g0524700	0.641323	0.130079
Os01g0525350	1.17759	ns	ns	2.55656	1.31441	ns	ns	2.74621			Os01g0525350	1.94869	0.816998
Os01g0525500	ns	ns	-1.71313	ns	ns	ns	ns	ns			Os01g0525500	-1.71313	#DIV/0!
Os01g0525700	ns	ns	1.1137	-1.77663	ns	ns	ns	ns			Os01g0525700	-0.331468	2.04377
Os01g0525701	ns	ns	0.835942	-1.75984	ns	ns	ns	ns			Os01g0525701	-0.461949	1.83549
Os01g0525800	ns	ns	ns	-0.811291	ns	ns	ns	ns			Os01g0525800	-0.811291	#DIV/0!
Os01g0526100	ns	ns	ns	1.08979	ns	ns	ns	1.08795			Os01g0526100	1.08887	0.00129914
Os01g0526200	-0.385421	-0.853942	-0.514236	-0.352056	ns	ns	ns	ns			Os01g0526200	-0.526414	0.229276
Os01g0527400	ns	ns	0.373694	ns	ns	ns	ns	ns			Os01g0527400	0.373694	#DIV/0!
Os01g0527600	0.444022	ns	ns	-0.513012	ns	ns	ns	-0.571609			Os01g0527600	-0.213533	0.570213
Os01g0528000	ns	ns	ns	-1.17414	ns	ns	ns	ns			Os01g0528000	-1.17414	#DIV/0!
Os01g0528800	ns	ns	-0.495036	ns	-0.601865	ns	-0.700811	ns			Os01g0528800	-0.599237	0.102912
Os01g0529800	ns	ns	-0.567712	ns	ns	ns	-0.618031	ns			Os01g0529800	-0.592871	0.0355811
Os01g0530100	10.5714	ns	ns	11.3535	10.5538	ns	ns	11.3811			Os01g0530100	10.965	0.46476
Os01g0530300	ns	ns	1.00688	-1.37566	ns	ns	1.67302	ns			Os01g0530300	0.434746	1.60285
Os01g0530316	ns	ns	1.23964	-1.5545	ns	ns	1.49562	-1.12665			Os01g0530316	0.0135282	1.57678
Os01g0530366	ns	-1.16278	ns	ns	ns	ns	ns	ns			Os01g0530366	-1.16278	#DIV/0!
Os01g0530400	ns	ns	ns	-0.480972	ns	ns	ns	ns			Os01g0530400	-0.480972	#DIV/0!
Os01g0530650	0.66453	ns	1.73616	0.726412	ns	ns	1.57395	ns			Os01g0530650	1.17526	0.558532
Os01g0531000	0.828037	-0.965509	-0.854469	0.945482	ns	-1.33604	-1.23224	0.586582			Os01g0531000	-0.289737	1.02484
Os01g0531200	ns	ns	ns	0.407256	ns	ns	ns	0.494107			Os01g0531200	0.450681	0.0614125
Os01g0531400	ns	ns	ns	-0.557866	ns	ns	ns	ns			Os01g0531400	-0.557866	#DIV/0!
Os01g0531500	ns	ns	ns	-0.658352	ns	ns	0.614202	ns			Os01g0531500	-0.0220751	0.899832
Os01g0532300	ns	ns	ns	-1.12749	ns	ns	ns	ns			Os01g0532300	-1.12749	#DIV/0!
Os01g0532700	ns	ns	ns	4.70201	ns	ns	ns	ns			Os01g0532700	4.70201	#DIV/0!
Os01g0532800	-0.524299	-1.74736	-1.07142	-0.99237	ns	ns	ns	ns			Os01g0532800	-1.08386	0.503939
Os01g0533000	ns	-0.696394	ns	-1.33718	ns	ns	ns	-0.755458			Os01g0533000	-0.929676	0.354139
Os01g0533100	ns	ns	ns	-1.59711	ns	ns	ns	ns			Os01g0533100	-1.59711	#DIV/0!
Os01g0533500	ns	ns	ns	-0.463227	ns	ns	ns	ns			Os01g0533500	-0.463227	#DIV/0!
Os01g0533800	0.790651	ns	ns	ns	ns	ns	ns	ns			Os01g0533800	0.790651	#DIV/0!
Os01g0533850	ns	ns	ns	1.94726	ns	ns	ns	2.03509			Os01g0533850	1.99117	0.0621051
Os01g0533900	ns	ns	ns	1.47908	ns	ns	ns	1.25223			Os01g0533900	1.36566	0.160407
Os01g0534700	ns	ns	ns	-1.02613	0.839482	ns	ns	ns			Os01g0534700	-0.093323	1.31919
Os01g0534800	ns	0.924097	ns	1.89972	ns	ns	ns	ns			Os01g0534800	1.41191	0.689868
Os01g0534900	ns	-0.764064	ns	ns	0.585833	ns	ns	ns			Os01g0534900	-0.0891157	0.954522
Os01g0535400	-1.52499	ns	ns	-0.44376	-1.73503	ns	ns	-0.623575			Os01g0535400	-1.08184	0.642958
Os01g0536000	ns	-0.405565	ns	-0.342634	ns	ns	ns	ns			Os01g0536000	-0.374099	0.0444985
Os01g0536400	ns	ns	1.15659	ns	ns	ns	ns	ns			Os01g0536400	1.15659	#DIV/0!
Os01g0537250	ns	ns	ns	5.4822	ns	ns	ns	5.5669			Os01g0537250	5.52455	0.0598893
Os01g0538000	ns	11.3924	12.1114	12.0809	ns	15.3453	16.182	16.1648			Os01g0538000	13.8795	2.24586
Os01g0539400	2.63886	ns	ns	9.68955	3.77441	ns	ns	10.9843			Os01g0539400	6.77179	4.17629
Os01g0539900	ns	ns	5.58772	14.3074	ns	ns	3.36589	11.7782			Os01g0539900	8.7598	5.133
Os01g0540800	ns	ns	ns	9.78873	ns	ns	ns	14.1443			Os01g0540800	11.9665	3.07983
Os01g0541000	ns	ns	ns	14.9995	ns	ns	ns	15.023			Os01g0541000	15.0112	0.0165634
Os01g0541600	-2.44477	ns	0.875224	1.12878	-2.88622	ns	ns	0.726902			Os01g0541600	-0.520015	1.97
Os01g0542000	ns	ns	ns	-1.13374	ns	ns	ns	ns			Os01g0542000	-1.13374	#DIV/0!
Os01g0542700	ns	2.82146	2.91028	2.25693	ns	ns	1.10805	ns			Os01g0542700	2.27418	0.829514
Os01g0543000	-0.843927	ns	ns	-0.923503	-0.72328	ns	ns	-0.761848			Os01g0543000	-0.81314	0.0891321
Os01g0543100	0.846948	ns	-0.619492	2.06066	0.931378	ns	ns	2.2055			Os01g0543100	1.085	1.13941
Os01g0544450	ns	-1.80033	-1.79772	-2.51899	ns	ns	ns	-1.60362			Os01g0544450	-1.93017	0.403215
Os01g0544700	14.2622	12.1226	ns	13.8819	14.2606	12.0863	ns	13.9064			Os01g0544700	13.42	1.03226
Os01g0545100	2.3147	ns	ns	3.68424	ns	ns	ns	3.73692			Os01g0545100	3.24528	0.806341
Os01g0545900	ns	1.12985	ns	ns	ns	0.86309	ns	ns			Os01g0545900	0.996471	0.188629
Os01g0546000	-1.58187	ns	ns	-4.32775	-1.69657	ns	ns	-4.39866			Os01g0546000	-3.00121	1.57366
Os01g0546400	ns	ns	0.579854	-2.02933	ns	ns	ns	-1.80678			Os01g0546400	-1.08542	1.44646
Os01g0546500	ns	ns	ns	-0.651215	ns	ns	ns	-0.55294			Os01g0546500	-0.602078	0.0694914
Os01g0546800	ns	ns	ns	1.06638	ns	ns	ns	ns			Os01g0546800	1.06638	#DIV/0!
Os01g0546900	ns	ns	ns	ns	-0.614418	-0.603822	ns	-0.635495			Os01g0546900	-0.617912	0.0161229
Os01g0547000	1.93544	0.719582	ns	ns	2.52993	1.25684	ns	0.824773			Os01g0547000	1.45331	0.768696
Os01g0547133	ns	ns	-0.755142	-0.554245	ns	ns	-0.699569	ns			Os01g0547133	-0.669652	0.103736
Os01g0547200	0.606098	ns	ns	0.585146	ns	ns	ns	ns			Os01g0547200	0.595622	0.0148156
Os01g0547500	ns	ns	ns	-1.06713	ns	ns	ns	-0.714723			Os01g0547500	-0.890926	0.24919
Os01g0547600	ns	ns	0.873291	-1.11248	ns	ns	1.31669	ns			Os01g0547600	0.359168	1.29362
Os01g0548600	ns	1.44771	-0.530087	0.899587	-1.46696	ns	-1.6897	ns			Os01g0548600	-0.267889	1.3995
Os01g0548750	ns	ns	-1.23499	ns	-2.12375	ns	-2.96628	ns			Os01g0548750	-2.10834	0.865745
Os01g0548900	ns	0.994964	0.981771	-10.4348	ns	1.19974	1.24349	-10.0255			Os01g0548900	-2.67339	5.85581
Os01g0549000	ns	-5.05194	ns	-2.23105	ns	ns	ns	ns			Os01g0549000	-3.6415	1.99467
Os01g0549200	ns	ns	0.677057	ns	ns	ns	0.984782	ns			Os01g0549200	0.83092	0.217595
Os01g0549250	ns	ns	ns	ns	ns	ns	3.41736	ns			Os01g0549250	3.41736	#DIV/0!
Os01g0549300	6.43748	ns	ns	9.64077	2.94043	ns	ns	6.14129			Os01g0549300	6.28999	2.73807
Os01g0549500	ns	ns	0.826135	0.391855	ns	ns	0.491552	ns			Os01g0549500	0.569847	0.227481
Os01g0549700	-0.485953	-0.55422	-0.457857	ns	ns	ns	ns	ns			Os01g0549700	-0.499343	0.049557
Os01g0550000	-0.377858	-0.861656	-0.333038	-0.777773	ns	-0.545142	ns	-0.4286			Os01g0550000	-0.554011	0.219263
Os01g0550100	-0.556892	ns	ns	-0.256769	ns	ns	ns	ns			Os01g0550100	-0.406831	0.212219
Os01g0550300	0.43854	0.847532	0.30754	2.18486	ns	ns	ns	ns			Os01g0550300	0.944617	0.858216
Os01g0550600	ns	1.11297	ns	ns	ns	ns	ns	ns			Os01g0550600	1.11297	#DIV/0!
Os01g0550800	2.02484	2.94406	4.87482	ns	8.61751	9.44441	11.5448	7.14293			Os01g0550800	6.6562	3.51566
Os01g0551000	-0.892605	1.02767	ns	ns	-1.53103	ns	ns	-0.877016			Os01g0551000	-0.568244	1.10671
Os01g0551100	ns	1.26895	0.972336	ns	ns	ns	ns	ns			Os01g0551100	1.12064	0.20974
Os01g0551400	ns	-1.0116	-0.653643	-1.13829	ns	ns	ns	ns			Os01g0551400	-0.934513	0.251353
Os01g0551800	ns	-2.64922	-2.75736	-2.3852	ns	-1.8599	-1.98651	-1.58041			Os01g0551800	-2.2031	0.467297
Os01g0551900	ns	ns	ns	-0.642175	ns	ns	ns	ns			Os01g0551900	-0.642175	#DIV/0!
Os01g0552000	ns	ns	ns	-0.561781	ns	ns	ns	ns			Os01g0552000	-0.561781	#DIV/0!
Os01g0552100	ns	-2.13723	-1.22935	ns	-1.58547	-3.22386	-2.25866	-1.12294			Os01g0552100	-1.92625	0.785609
Os01g0552300	ns	-2.05699	-1.38638	-0.93866	ns	ns	-0.864457	ns			Os01g0552300	-1.31162	0.54779
Os01g0552500	-2.36933	-8.46562	-5.73334	-9.68484	-2.5286	-8.69689	-5.9194	-9.94079			Os01g0552500	-6.66735	3.02861
Os01g0552850	ns	-8.02706	-8.88582	-9.29739	ns	-9.34096	-10.1299	-10.4752			Os01g0552850	-9.35939	0.876615
Os01g0553200	ns	-9.32221	-10.1091	-10.4951	ns	-10.2046	-10.9802	-11.3146			Os01g0553200	-10.4043	0.702364
Os01g0553400	1.10538	-10.6972	-11.4665	-11.8406	ns	-11.4444	-12.2029	-12.5503			Os01g0553400	-9.87094	4.87648
Os01g0553600	ns	-6.6577	-12.3036	-12.6736	ns	-7.46195	-13.1899	-13.5165			Os01g0553600	-10.9672	3.06581
Os01g0554150	ns	-8.29791	-9.10622	-9.50995	ns	-9.78527	-10.5652	-10.9059			Os01g0554150	-9.69508	0.955459
Os01g0555100	ns	ns	ns	2.11613	ns	ns	ns	ns			Os01g0555100	2.11613	#DIV/0!
Os01g0555200	1.73008	1.36034	1.96724	0.726444	2.09836	1.66585	2.34084	1.0993			Os01g0555200	1.62356	0.537206
Os01g0555300	ns	ns	ns	ns	ns	ns	ns	0.407835			Os01g0555300	0.407835	#DIV/0!
Os01g0555600	ns	ns	ns	-2.11229	ns	ns	ns	-1.58593			Os01g0555600	-1.84911	0.372188
Os01g0555800	0.57243	ns	0.791672	ns	ns	ns	0.837474	ns			Os01g0555800	0.733858	0.141665
Os01g0556201	ns	ns	ns	1.24277	ns	ns	ns	ns			Os01g0556201	1.24277	#DIV/0!
Os01g0556400	ns	0.839065	0.748397	0.815292	ns	ns	ns	ns			Os01g0556400	0.800918	0.047012
Os01g0557100	-1.09868	ns	-1.82706	-10.0607	ns	ns	-1.5612	-9.74836			Os01g0557100	-4.85921	4.61444
Os01g0558100	ns	2.08528	ns	1.24835	-2.28375	ns	-1.97305	ns			Os01g0558100	-0.230793	2.22127
Os01g0558200	-0.266488	ns	ns	ns	ns	ns	ns	ns			Os01g0558200	-0.266488	#DIV/0!
Os01g0558300	-0.523122	-0.300635	ns	-0.517818	ns	ns	ns	ns			Os01g0558300	-0.447192	0.12695
Os01g0558500	ns	ns	ns	0.499836	ns	ns	ns	ns			Os01g0558500	0.499836	#DIV/0!
Os01g0558600	ns	ns	ns	1.15423	ns	ns	ns	0.663971			Os01g0558600	0.909103	0.346668
Os01g0558700	ns	3.54022	ns	3.18644	-3.54887	ns	-2.81933	ns			Os01g0558700	0.0896141	3.79462
Os01g0558800	ns	ns	ns	0.621611	ns	ns	ns	0.713273			Os01g0558800	0.667442	0.0648151
Os01g0558825	ns	-5.68203	-6.37326	-6.79114	7.37195	ns	ns	ns			Os01g0558825	-2.86862	6.84235
Os01g0558850	-0.517085	ns	ns	ns	ns	ns	ns	ns			Os01g0558850	-0.517085	#DIV/0!
Os01g0558900	-0.502105	ns	-0.408698	ns	ns	ns	ns	ns			Os01g0558900	-0.455401	0.0660486
Os01g0559000	0.471547	ns	0.617316	-1.16984	0.544285	ns	0.687846	-1.01629			Os01g0559000	0.0224764	0.868466
Os01g0559100	-0.67823	-0.8619	-0.700884	-0.738235	ns	-0.450127	ns	ns			Os01g0559100	-0.685875	0.149656
Os01g0559200	-0.601905	ns	ns	0.795337	-1.03259	ns	ns	ns			Os01g0559200	-0.279718	0.955605
Os01g0559300	ns	ns	-0.483565	ns	ns	ns	ns	ns			Os01g0559300	-0.483565	#DIV/0!
Os01g0559500	0.68209	-0.859582	-0.530692	ns	0.786041	ns	ns	ns			Os01g0559500	0.0194639	0.83708
Os01g0559525	0.763081	ns	ns	ns	ns	ns	ns	ns			Os01g0559525	0.763081	#DIV/0!
Os01g0559550	ns	ns	ns	-0.956978	ns	ns	ns	-1.16357			Os01g0559550	-1.06027	0.14608
Os01g0559600	-1.3633	ns	ns	0.709808	-1.292	ns	ns	0.773155			Os01g0559600	-0.293084	1.19525
Os01g0559750	-1.20322	ns	ns	1.56346	-1.50136	ns	ns	1.11059			Os01g0559750	-0.00763253	1.56837
Os01g0559900	-3.06989	ns	ns	1.08036	-3.24975	ns	ns	0.839393			Os01g0559900	-1.09997	2.38167
Os01g0560000	-0.499576	0.539197	0.525548	ns	-0.518327	ns	ns	ns			Os01g0560000	0.0117104	0.601283
Os01g0560200	ns	ns	0.654245	ns	ns	ns	0.797781	ns			Os01g0560200	0.726013	0.101495
Os01g0561500	-0.662869	ns	ns	-0.771992	ns	ns	ns	ns			Os01g0561500	-0.71743	0.077162
Os01g0562400	1.98989	ns	ns	0.814589	10.8174	8.48615	9.26548	9.51432			Os01g0562400	6.81464	4.27528
Os01g0562600	5.47819	ns	ns	ns	8.3222	ns	ns	ns			Os01g0562600	6.9002	2.01102
Os01g0563000	ns	ns	3.43703	ns	ns	ns	6.90589	3.77622			Os01g0563000	4.70638	1.91236
Os01g0565600	1.11875	-0.758821	ns	ns	0.96297	-0.867402	ns	ns			Os01g0565600	0.113875	1.0732
Os01g0565800	-4.11617	-1.58735	-1.20579	-2.99328	-4.51444	ns	-1.57304	-3.35911			Os01g0565800	-2.76417	1.32477
Os01g0565900	1.3273	0.780535	0.636368	2.14488	ns	ns	ns	1.44872			Os01g0565900	1.26756	0.600348
Os01g0566000	ns	ns	ns	3.91354	ns	ns	ns	2.40368			Os01g0566000	3.15861	1.06763
Os01g0566050	0.597093	0.535302	0.669632	ns	0.735348	ns	0.808934	ns			Os01g0566050	0.669262	0.108431
Os01g0566100	0.530962	ns	0.476429	ns	ns	ns	ns	ns			Os01g0566100	0.503695	0.038561
Os01g0566200	-10.3577	ns	ns	-3.638	-10.0608	ns	ns	-3.30458			Os01g0566200	-6.84028	3.89445
Os01g0566500	-1.53885	-3.13348	-8.33498	-3.1137	-3.61769	-5.32719	-10.774	-5.13269			Os01g0566500	-5.12157	3.05661
Os01g0566800	ns	0.817486	0.775634	ns	ns	ns	ns	ns			Os01g0566800	0.79656	0.029594
Os01g0566900	ns	ns	0.629993	-0.769399	ns	ns	ns	-0.773235			Os01g0566900	-0.304214	0.809049
Os01g0567200	7.77092	ns	3.17913	ns	13.2473	0.406184	8.15182	ns			Os01g0567200	6.55106	4.95023
Os01g0567400	ns	1.73005	1.46027	1.69056	ns	ns	ns	1.02005			Os01g0567400	1.47523	0.325941
Os01g0567600	ns	ns	ns	4.46992	ns	ns	ns	4.62344			Os01g0567600	4.54668	0.108556
Os01g0568400	-4.63018	-7.53855	-8.37968	-4.22017	-6.02283	-9.11098	-9.94529	-5.54864			Os01g0568400	-6.92454	2.1275
Os01g0570500	ns	0.379204	0.478294	ns	ns	ns	ns	ns			Os01g0570500	0.428749	0.0700674
Os01g0570800	ns	2.11036	0.835934	0.702175	ns	ns	ns	ns			Os01g0570800	1.21616	0.777284
Os01g0571000	ns	ns	ns	0.384751	ns	ns	ns	ns			Os01g0571000	0.384751	#DIV/0!
Os01g0571100	0.711158	1.29455	1.52824	0.993261	ns	1.17882	1.41966	0.940653			Os01g0571100	1.15234	0.288228
Os01g0571133	ns	0.719016	1.1318	0.868263	ns	ns	1.06273	0.841963			Os01g0571133	0.924754	0.169026
Os01g0571166	ns	ns	ns	1.93521	ns	ns	ns	1.90848			Os01g0571166	1.92184	0.0189064
Os01g0571200	ns	ns	ns	-0.714795	ns	ns	ns	ns			Os01g0571200	-0.714795	#DIV/0!
Os01g0571300	ns	ns	ns	1.12943	ns	ns	-1.75264	ns			Os01g0571300	-0.311603	2.03793
Os01g0571500	ns	ns	ns	ns	ns	-3.06077	ns	-3.05904			Os01g0571500	-3.0599	0.0012205
Os01g0571700	ns	ns	ns	-1.92707	ns	ns	ns	-1.70819			Os01g0571700	-1.81763	0.154775
Os01g0571766	ns	-3.93768	ns	-5.41081	ns	-3.74411	ns	-5.2079			Os01g0571766	-4.57512	0.855514
Os01g0572100	ns	ns	ns	0.471478	ns	ns	ns	ns			Os01g0572100	0.471478	#DIV/0!
Os01g0572200	ns	ns	0.503692	0.69009	ns	ns	ns	ns			Os01g0572200	0.596891	0.131803
Os01g0572700	ns	-0.667031	-0.328037	-0.966205	ns	ns	ns	ns			Os01g0572700	-0.653758	0.319291
Os01g0574400	ns	-0.525387	ns	ns	ns	ns	ns	ns			Os01g0574400	-0.525387	#DIV/0!
Os01g0574800	ns	ns	ns	0.878902	ns	ns	ns	0.504977			Os01g0574800	0.691939	0.264405
Os01g0575000	ns	ns	ns	0.43124	ns	ns	ns	ns			Os01g0575000	0.43124	#DIV/0!
Os01g0575200	ns	2.24799	0.746707	0.645855	ns	1.58438	ns	ns			Os01g0575200	1.30623	0.755743
Os01g0575500	ns	ns	ns	-0.379527	ns	ns	ns	ns			Os01g0575500	-0.379527	#DIV/0!
Os01g0576000	-4.54047	-2.27233	-2.71996	0.717549	-5.33764	-3.10536	-3.51951	ns			Os01g0576000	-2.96825	1.9382
Os01g0576050	-5.62758	-4.53225	-3.43611	0.724403	-6.35216	-5.26304	-4.16157	ns			Os01g0576050	-4.09262	2.33325
Os01g0577450	0.435577	ns	ns	ns	ns	ns	ns	ns			Os01g0577450	0.435577	#DIV/0!
Os01g0578000	ns	ns	0.460258	ns	ns	ns	ns	ns			Os01g0578000	0.460258	#DIV/0!
Os01g0578200	0.997046	-6.59412	ns	ns	ns	-7.05527	ns	ns			Os01g0578200	-4.21745	4.52177
Os01g0578500	ns	-5.83555	ns	ns	ns	-6.45117	ns	ns			Os01g0578500	-6.14336	0.435312
Os01g0578700	-8.9962	-8.55722	-5.16996	ns	-9.54573	-9.09246	-5.64553	ns			Os01g0578700	-7.83452	1.91176
Os01g0579600	-0.780908	ns	-0.482418	ns	-1.31014	ns	-1.00325	-0.607928			Os01g0579600	-0.836928	0.328956
Os01g0579800	ns	ns	-1.00877	-0.694276	ns	ns	ns	ns			Os01g0579800	-0.851525	0.222385
Os01g0579900	ns	ns	0.65761	-0.536177	ns	ns	ns	-0.896913			Os01g0579900	-0.258493	0.813613
Os01g0580000	-0.646395	ns	-0.441023	-1.25753	ns	ns	ns	ns			Os01g0580000	-0.781651	0.424727
Os01g0580300	-1.78588	ns	ns	ns	-1.60125	ns	ns	ns			Os01g0580300	-1.69357	0.130555
Os01g0580500	1.13022	ns	ns	-1.10637	2.9281	2.71413	2.60284	ns			Os01g0580500	1.65379	1.69864
Os01g0580800	ns	-1.11979	-0.557591	ns	ns	ns	ns	ns			Os01g0580800	-0.838692	0.397537
Os01g0581300	2.26801	ns	ns	3.48449	2.30992	ns	ns	3.52425			Os01g0581300	2.89667	0.702109
Os01g0581400	ns	ns	-2.26458	ns	ns	ns	-2.44675	ns			Os01g0581400	-2.35567	0.128809
Os01g0581800	ns	ns	ns	7.33745	ns	ns	ns	7.36692			Os01g0581800	7.35219	0.0208358
Os01g0581900	ns	ns	0.568889	0.321471	ns	ns	ns	ns			Os01g0581900	0.44518	0.174951
Os01g0582600	ns	2.23923	ns	2.04875	ns	ns	-1.84855	ns			Os01g0582600	0.813142	2.30706
Os01g0583100	ns	ns	-0.426423	0.62608	ns	ns	-1.27889	ns			Os01g0583100	-0.359744	0.954233
Os01g0583200	-0.587349	-1.09532	-0.359119	-1.57339	ns	ns	ns	-0.931339			Os01g0583200	-0.909304	0.469696
Os01g0583300	ns	ns	ns	1.0913	1.20482	ns	1.71833	2.37537			Os01g0583300	1.59746	0.585981
Os01g0584200	ns	0.916878	1.10725	0.717774	ns	ns	0.698411	ns			Os01g0584200	0.860078	0.192099
Os01g0584300	ns	12.1808	ns	ns	ns	12.1481	ns	ns			Os01g0584300	12.1645	0.0230941
Os01g0584800	-0.835749	-0.575298	ns	-0.56856	ns	ns	ns	ns			Os01g0584800	-0.659869	0.152354
Os01g0584900	ns	5.12137	1.59159	3.32468	-2.59016	ns	ns	ns			Os01g0584900	1.86187	3.29938
Os01g0585100	-0.705827	ns	ns	-0.646335	-0.608053	ns	ns	-0.506455			Os01g0585100	-0.616667	0.0837665
Os01g0585300	1.57172	1.67758	2.39465	2.59775	ns	1.24237	2.0421	2.28531			Os01g0585300	1.97307	0.492024
Os01g0585400	ns	ns	ns	3.54434	ns	ns	ns	4.13557			Os01g0585400	3.83995	0.418061
Os01g0585600	ns	ns	ns	1.00331	ns	ns	ns	0.848285			Os01g0585600	0.925796	0.109616
Os01g0585700	ns	ns	ns	0.424505	ns	ns	ns	0.470374			Os01g0585700	0.44744	0.032434
Os01g0586600	0.301734	ns	0.566435	-0.56007	ns	ns	ns	ns			Os01g0586600	0.1027	0.589037
Os01g0586800	ns	ns	ns	6.81116	ns	ns	ns	2.17046			Os01g0586800	4.49081	3.28147
Os01g0587000	ns	ns	0.789764	0.480927	ns	ns	0.785429	0.514754			Os01g0587000	0.642718	0.167869
Os01g0587300	0.997452	ns	ns	1.35068	ns	ns	ns	1.12949			Os01g0587300	1.15921	0.178477
Os01g0587400	2.65287	ns	ns	3.67298	2.54345	ns	ns	3.48256			Os01g0587400	3.08796	0.572643
Os01g0587500	ns	ns	ns	0.763437	ns	ns	ns	ns			Os01g0587500	0.763437	#DIV/0!
Os01g0587900	11.6937	ns	ns	ns	11.6754	ns	ns	ns			Os01g0587900	11.6845	0.012986
Os01g0588000	ns	ns	ns	ns	ns	0.801022	ns	0.76186			Os01g0588000	0.781441	0.0276918
Os01g0588400	ns	ns	ns	ns	-1.00728	ns	ns	ns			Os01g0588400	-1.00728	#DIV/0!
Os01g0588500	ns	0.559873	0.526331	ns	ns	ns	ns	ns			Os01g0588500	0.543102	0.0237179
Os01g0588600	ns	ns	ns	2.62869	ns	ns	ns	2.55256			Os01g0588600	2.59062	0.0538322
Os01g0588700	ns	ns	ns	0.638483	ns	ns	ns	0.577549			Os01g0588700	0.608016	0.0430871
Os01g0588800	ns	ns	ns	-0.353364	ns	ns	ns	ns			Os01g0588800	-0.353364	#DIV/0!
Os01g0588900	ns	ns	-0.942519	1.80421	ns	ns	-1.90734	ns			Os01g0588900	-0.348553	1.92575
Os01g0589200	-0.844988	-2.14055	-3.011	-3.73687	-1.23152	-2.52753	-3.42541	-4.11989			Os01g0589200	-2.62972	1.17199
Os01g0589300	ns	ns	ns	1.02934	ns	ns	-0.934009	ns			Os01g0589300	0.0476639	1.3883
Os01g0589500	0.501403	0.67289	1.19755	0.437653	ns	ns	0.784588	ns			Os01g0589500	0.718818	0.30081
Os01g0589700	ns	ns	ns	0.486056	ns	ns	ns	ns			Os01g0589700	0.486056	#DIV/0!
Os01g0589800	1.51345	1.31598	1.61835	1.60765	ns	ns	ns	ns			Os01g0589800	1.51386	0.140083
Os01g0590100	ns	-3.62267	-3.2723	-3.28158	ns	ns	-2.83149	-2.80475			Os01g0590100	-3.16256	0.3448
Os01g0590200	ns	ns	0.47786	-0.443183	ns	ns	0.992519	ns			Os01g0590200	0.342399	0.727374
Os01g0590700	ns	-1.60326	ns	-0.818909	ns	-1.29487	ns	ns			Os01g0590700	-1.23901	0.395148
Os01g0590900	-0.726256	-1.03803	-0.886625	-0.260062	-0.520551	-0.813385	-0.669234	ns			Os01g0590900	-0.70202	0.254723
Os01g0591000	1.41245	-1.84331	ns	1.16188	2.28186	ns	ns	2.04725			Os01g0591000	1.01203	1.65981
Os01g0591250	ns	ns	ns	1.22572	1.53015	ns	ns	2.21137			Os01g0591250	1.65575	0.504687
Os01g0591300	1.61457	ns	ns	2.65177	1.94679	ns	ns	3.02338			Os01g0591300	2.30913	0.643236
Os01g0592500	-1.46615	-4.24591	-2.06744	-4.28346	ns	ns	ns	ns			Os01g0592500	-3.01574	1.46298
Os01g0592900	ns	-0.93584	ns	-0.391683	ns	ns	ns	ns			Os01g0592900	-0.663762	0.384777
Os01g0593000	-0.518464	0.367554	ns	-1.02111	ns	ns	ns	-0.915652			Os01g0593000	-0.521919	0.631241
Os01g0593200	ns	0.777202	ns	ns	ns	ns	ns	ns			Os01g0593200	0.777202	#DIV/0!
Os01g0593500	ns	-1.71032	-0.512867	-0.986095	ns	-0.905864	ns	ns			Os01g0593500	-1.02879	0.499196
Os01g0593600	ns	ns	ns	0.913992	ns	ns	ns	ns			Os01g0593600	0.913992	#DIV/0!
Os01g0593700	ns	5.19891	4.79244	3.00978	ns	5.02523	4.68619	2.81085			Os01g0593700	4.2539	1.05784
Os01g0594300	1.12196	1.91339	0.546041	1.24015	ns	ns	ns	ns			Os01g0594300	1.20539	0.561003
Os01g0594800	ns	ns	ns	2.64603	ns	ns	-0.355093	ns			Os01g0594800	1.14547	2.12212
Os01g0595300	ns	ns	0.454405	0.436833	ns	ns	ns	ns			Os01g0595300	0.445619	0.0124254
Os01g0595400	0.763084	1.3536	1.39474	0.574374	ns	0.995257	1.05455	ns			Os01g0595400	1.0226	0.321892
Os01g0595900	ns	ns	ns	-2.48537	-2.66494	ns	-1.69305	-3.47643			Os01g0595900	-2.57995	0.731761
Os01g0596100	0.684604	1.05756	1.41115	ns	1.85225	2.23312	2.59947	1.24211			Os01g0596100	1.58289	0.6779
Os01g0596300	ns	0.830553	ns	0.853301	ns	2.57889	ns	2.77093			Os01g0596300	1.75842	1.06121
Os01g0596425	ns	ns	ns	ns	ns	8.08034	ns	7.20183			Os01g0596425	7.64108	0.621201
Os01g0597600	ns	ns	ns	1.83154	ns	ns	-2.00597	ns			Os01g0597600	-0.0872139	2.71353
Os01g0597800	ns	3.40639	ns	1.74986	ns	3.92572	ns	2.31836			Os01g0597800	2.85008	0.993257
Os01g0598000	ns	ns	ns	ns	-3.77602	ns	-4.27784	ns			Os01g0598000	-4.02693	0.354838
Os01g0598600	0.822851	ns	1.06533	0.60599	ns	ns	ns	ns			Os01g0598600	0.831391	0.22979
Os01g0598900	-5.82316	ns	-1.96645	-5.25725	-5.29331	1.00742	-1.40987	-4.70124			Os01g0598900	-3.34912	2.58269
Os01g0599550	-2.79582	ns	ns	-1.7991	ns	1.0129	ns	ns			Os01g0599550	-1.19401	1.97514
Os01g0600000	ns	-0.38305	ns	ns	ns	ns	ns	ns			Os01g0600000	-0.38305	#DIV/0!
Os01g0600200	ns	ns	ns	ns	ns	ns	ns	0.480385			Os01g0600200	0.480385	#DIV/0!
Os01g0600300	ns	ns	ns	-0.450272	ns	ns	ns	ns			Os01g0600300	-0.450272	#DIV/0!
Os01g0600500	ns	ns	ns	1.37999	ns	ns	ns	ns			Os01g0600500	1.37999	#DIV/0!
Os01g0600900	9.58656	ns	5.84694	7.90711	6.89197	ns	2.77441	5.03148			Os01g0600900	6.33974	2.36514
Os01g0601200	ns	ns	ns	-1.06266	ns	ns	ns	ns			Os01g0601200	-1.06266	#DIV/0!
Os01g0601625	-1.01505	-1.91178	ns	-1.62256	ns	ns	ns	-1.08242			Os01g0601625	-1.40795	0.432144
Os01g0601675	0.9796	ns	1.49237	ns	ns	ns	ns	ns			Os01g0601675	1.23599	0.362587
Os01g0601700	10.1584	ns	11.5788	8.47176	10.1387	ns	11.5649	8.50754			Os01g0601700	10.07	1.37982
Os01g0602075	1.42046	2.97431	ns	2.9197	ns	ns	ns	1.54431			Os01g0602075	2.21469	0.847402
Os01g0602200	ns	2.35747	-0.443821	1.55859	ns	ns	-0.377492	ns			Os01g0602200	0.773687	1.40618
Os01g0602400	ns	4.7868	ns	3.34962	ns	2.21102	ns	ns			Os01g0602400	3.44915	1.29077
Os01g0602600	ns	ns	ns	2.13816	ns	ns	ns	ns			Os01g0602600	2.13816	#DIV/0!
Os01g0602800	ns	ns	ns	0.39388	ns	ns	ns	ns			Os01g0602800	0.39388	#DIV/0!
Os01g0603000	-0.398736	-0.854041	-0.506469	-0.82267	ns	ns	ns	ns			Os01g0603000	-0.645479	0.227377
Os01g0603100	ns	ns	ns	ns	ns	ns	1.60998	ns			Os01g0603100	1.60998	#DIV/0!
Os01g0603300	0.687597	ns	1.35694	1.12306	ns	ns	0.791127	ns			Os01g0603300	0.989681	0.307326
Os01g0603500	1.18649	-8.81985	-3.5699	ns	ns	-10.5435	-5.09116	ns			Os01g0603500	-5.36758	4.60901
Os01g0603700	-1.40582	ns	ns	-1.81905	ns	3.09384	2.98546	ns			Os01g0603700	0.713606	2.69154
Os01g0603800	-1.46919	ns	ns	-5.86939	ns	9.5609	ns	ns			Os01g0603800	0.740776	7.94899
Os01g0604000	-9.22034	1.53993	1.08659	-9.99749	ns	11.8465	11.1998	ns			Os01g0604000	1.07584	9.45884
Os01g0604100	ns	-1.20521	0.867634	1.86032	ns	-2.50989	ns	ns			Os01g0604100	-0.246785	1.9767
Os01g0604150	0.718556	-7.89137	-4.5828	1.14682	ns	-9.26094	-5.77817	ns			Os01g0604150	-4.27465	4.35026
Os01g0604500	ns	0.959659	0.684166	ns	ns	ns	ns	ns			Os01g0604500	0.821913	0.194803
Os01g0604550	ns	ns	ns	ns	ns	ns	-3.05114	ns			Os01g0604550	-3.05114	#DIV/0!
Os01g0604700	ns	ns	ns	1.03699	ns	ns	ns	1.31252			Os01g0604700	1.17476	0.194827
Os01g0604900	-0.925017	ns	-0.777005	-0.539924	-1.26807	ns	-1.09444	-0.825053			Os01g0604900	-0.904919	0.254623
Os01g0605000	ns	3.11643	0.791783	3.3343	-2.31895	ns	-1.57327	ns			Os01g0605000	0.67006	2.60117
Os01g0605100	ns	3.80696	0.987866	3.37995	-2.08933	ns	ns	ns			Os01g0605100	1.52136	2.70802
Os01g0605300	ns	-1.6438	ns	-1.48619	ns	ns	ns	-0.857146			Os01g0605300	-1.32905	0.416205
Os01g0605500	ns	-2.12962	-1.55548	-1.69981	ns	ns	ns	ns			Os01g0605500	-1.79497	0.298662
Os01g0605650	ns	ns	0.326661	ns	ns	ns	ns	ns			Os01g0605650	0.326661	#DIV/0!
Os01g0605700	2.30469	3.84411	ns	3.11366	ns	ns	ns	ns			Os01g0605700	3.08749	0.770046
Os01g0606000	ns	4.31529	ns	3.26842	ns	3.06638	ns	2.21961			Os01g0606000	3.21743	0.861463
Os01g0606050	-0.650677	ns	ns	-1.57345	ns	ns	ns	ns			Os01g0606050	-1.11206	0.652499
Os01g0606133	ns	1.44144	ns	ns	ns	ns	ns	ns			Os01g0606133	1.44144	#DIV/0!
Os01g0606166	ns	ns	ns	ns	0.312468	0.0922385	0.233859	ns			Os01g0606166	0.212855	0.111607
Os01g0606400	-2.9975	ns	-4.5662	ns	-4.48162	ns	-5.96436	-2.07186			Os01g0606400	-4.01631	1.51101
Os01g0606900	ns	ns	-1.00327	ns	ns	ns	-1.40027	ns			Os01g0606900	-1.20177	0.280722
Os01g0607000	ns	ns	ns	1.8863	ns	ns	ns	ns			Os01g0607000	1.8863	#DIV/0!
Os01g0607100	ns	ns	ns	-1.1985	ns	ns	ns	-0.961741			Os01g0607100	-1.08012	0.167411
Os01g0607200	ns	ns	-0.66321	0.447207	ns	ns	-1.34853	ns			Os01g0607200	-0.521511	0.906216
Os01g0607250	ns	ns	-1.39984	ns	ns	ns	-1.7598	ns			Os01g0607250	-1.57982	0.254529
Os01g0607300	-0.810476	-2.18337	0.562669	-2.60732	ns	-1.15269	1.34552	-1.61971			Os01g0607300	-0.923626	1.43351
Os01g0607400	ns	0.391325	ns	ns	ns	0.415181	ns	ns			Os01g0607400	0.403253	0.0168687
Os01g0607900	ns	0.516467	0.468825	-0.625104	ns	ns	ns	-0.610793			Os01g0607900	-0.0626514	0.641524
Os01g0608000	ns	ns	3.04123	ns	ns	ns	ns	ns			Os01g0608000	3.04123	#DIV/0!
Os01g0608101	2.52189	3.67499	3.38467	ns	ns	ns	ns	ns			Os01g0608101	3.19385	0.599765
Os01g0608200	ns	ns	ns	ns	3.9268	ns	ns	ns			Os01g0608200	3.9268	#DIV/0!
Os01g0608300	ns	ns	ns	ns	7.42615	ns	ns	5.59584			Os01g0608300	6.511	1.29423
Os01g0608400	ns	ns	-6.93029	ns	ns	ns	-8.41604	ns			Os01g0608400	-7.67316	1.05058
Os01g0608900	ns	-1.55769	-0.894251	-0.915843	ns	ns	ns	ns			Os01g0608900	-1.1226	0.376959
Os01g0609000	-1.30718	-2.26513	-2.47809	-2.79343	-1.53196	-2.4819	-2.69391	-2.97462			Os01g0609000	-2.31578	0.596817
Os01g0609300	-1.31269	ns	-3.04474	1.37704	-1.56071	ns	-3.33537	ns			Os01g0609300	-1.5753	1.87367
Os01g0609501	-1.21317	ns	-2.86917	1.10364	ns	ns	-2.93905	ns			Os01g0609501	-1.47944	1.89781
Os01g0609700	7.7274	6.02602	7.73547	6.86368	4.34328	ns	4.37474	3.63279			Os01g0609700	5.81477	1.70744
Os01g0609900	ns	ns	-1.69431	2.18554	ns	ns	-2.84125	ns			Os01g0609900	-0.783341	2.6343
Os01g0610050	ns	3.71136	4.03234	ns	ns	7.04942	7.34713	ns			Os01g0610050	5.53506	1.92881
Os01g0610300	ns	ns	-1.63963	0.454222	ns	ns	-1.94216	ns			Os01g0610300	-1.04252	1.30501
Os01g0610400	ns	-0.73637	ns	-0.556399	ns	ns	ns	ns			Os01g0610400	-0.646384	0.127258
Os01g0610500	ns	ns	-0.327935	0.839007	ns	ns	ns	0.742904			Os01g0610500	0.417992	0.647777
Os01g0610600	ns	ns	ns	-0.632957	ns	ns	ns	ns			Os01g0610600	-0.632957	#DIV/0!
Os01g0610700	ns	ns	ns	0.905733	ns	ns	ns	ns			Os01g0610700	0.905733	#DIV/0!
Os01g0610800	ns	ns	ns	ns	ns	ns	-0.846535	-0.603545			Os01g0610800	-0.72504	0.171819
Os01g0611000	-0.651809	ns	-1.3291	-1.06006	ns	ns	-1.19881	-0.898496			Os01g0611000	-1.02765	0.264174
Os01g0611100	-0.612437	-0.950416	-0.522149	0.604749	ns	ns	ns	0.868385			Os01g0611100	-0.122374	0.805597
Os01g0611900	ns	ns	ns	-0.635807	ns	ns	ns	-0.578262			Os01g0611900	-0.607034	0.0406908
Os01g0612000	-0.410528	ns	ns	-0.6216	ns	ns	ns	ns			Os01g0612000	-0.516064	0.14925
Os01g0612200	ns	ns	ns	ns	ns	ns	ns	0.436653			Os01g0612200	0.436653	#DIV/0!
Os01g0612350	10.666	ns	ns	10.7143	11.0243	ns	ns	11.1265			Os01g0612350	10.8828	0.227171
Os01g0612500	ns	0.784136	ns	1.75105	ns	ns	ns	1.07149			Os01g0612500	1.20223	0.496539
Os01g0612600	0.301958	1.07177	0.381038	1.60235	ns	ns	ns	ns			Os01g0612600	0.839279	0.615096
Os01g0612700	ns	ns	0.474176	-0.887466	ns	ns	ns	ns			Os01g0612700	-0.206645	0.962826
Os01g0612800	ns	ns	0.636142	ns	ns	ns	0.728747	ns			Os01g0612800	0.682444	0.0654821
Os01g0612900	ns	ns	-1.65307	0.860981	ns	ns	-2.33766	ns			Os01g0612900	-1.04325	1.68426
Os01g0613100	2.17579	ns	ns	2.75356	ns	-0.745644	ns	ns			Os01g0613100	1.39457	1.87586
Os01g0613300	0.668287	ns	0.825284	-0.752762	ns	ns	ns	ns			Os01g0613300	0.246936	0.869315
Os01g0613800	5.68338	ns	ns	ns	ns	ns	ns	ns			Os01g0613800	5.68338	#DIV/0!
Os01g0613900	-0.776497	-1.58001	-1.84591	-0.635244	ns	ns	-1.2781	ns			Os01g0613900	-1.22315	0.515589
Os01g0614500	ns	ns	ns	-0.368614	ns	ns	ns	ns			Os01g0614500	-0.368614	#DIV/0!
Os01g0614700	ns	ns	ns	-0.216491	ns	ns	ns	ns			Os01g0614700	-0.216491	#DIV/0!
Os01g0614900	0.492277	ns	ns	0.68016	ns	ns	ns	0.550441			Os01g0614900	0.574293	0.0961853
Os01g0615000	-10.5206	ns	ns	-11.2671	-10.0452	ns	ns	-10.7664			Os01g0615000	-10.6498	0.508905
Os01g0615050	ns	ns	ns	ns	ns	ns	ns	0.383573			Os01g0615050	0.383573	#DIV/0!
Os01g0615100	ns	ns	-1.21638	0.778597	ns	ns	-1.31566	0.77504			Os01g0615100	-0.244601	1.18013
Os01g0615200	0.353635	ns	ns	1.25845	ns	ns	ns	0.77703			Os01g0615200	0.796372	0.452717
Os01g0615300	ns	ns	ns	0.660414	ns	ns	ns	ns			Os01g0615300	0.660414	#DIV/0!
Os01g0616100	ns	ns	0.446883	ns	ns	ns	ns	ns			Os01g0616100	0.446883	#DIV/0!
Os01g0616300	-0.68201	ns	-1.0802	ns	ns	ns	-1.36865	ns			Os01g0616300	-1.04362	0.34478
Os01g0616333	ns	ns	-0.826705	ns	ns	ns	ns	ns			Os01g0616333	-0.826705	#DIV/0!
Os01g0616366	-0.545686	ns	-0.892465	ns	ns	ns	-1.28544	ns			Os01g0616366	-0.907862	0.370115
Os01g0616500	-0.250112	-0.588202	ns	-0.800351	ns	ns	ns	ns			Os01g0616500	-0.546221	0.277511
Os01g0616600	ns	-0.616622	ns	-0.651527	ns	ns	ns	ns			Os01g0616600	-0.634074	0.0246812
Os01g0616900	ns	ns	0.754298	-1.45034	ns	ns	ns	-1.29499			Os01g0616900	-0.663677	1.23046
Os01g0617200	ns	ns	1.88514	ns	ns	ns	ns	-1.29522			Os01g0617200	0.294963	2.24886
Os01g0617500	-0.549307	-0.686466	ns	-0.582941	ns	ns	ns	ns			Os01g0617500	-0.606238	0.0714861
Os01g0617700	ns	-0.46046	ns	-0.497089	ns	ns	ns	-0.531042			Os01g0617700	-0.496197	0.0352994
Os01g0617800	-0.82004	-1.22357	ns	ns	ns	-0.901314	ns	ns			Os01g0617800	-0.981641	0.213421
Os01g0617900	1.36581	ns	1.87365	ns	1.60971	ns	2.12446	ns			Os01g0617900	1.74341	0.327932
Os01g0618000	ns	1.70677	ns	3.55324	-2.07223	ns	-3.19181	ns			Os01g0618000	-0.00100724	3.16335
Os01g0618100	ns	-0.620448	ns	-0.889103	ns	ns	ns	ns			Os01g0618100	-0.754776	0.189968
Os01g0618200	ns	ns	ns	1.2586	ns	ns	ns	1.18254			Os01g0618200	1.22057	0.0537843
Os01g0618300	ns	ns	ns	1.26778	ns	ns	ns	ns			Os01g0618300	1.26778	#DIV/0!
Os01g0618400	0.682336	ns	0.919664	ns	0.865511	ns	1.10344	ns			Os01g0618400	0.892737	0.173329
Os01g0618500	0.290516	ns	ns	0.711938	ns	ns	ns	ns			Os01g0618500	0.501227	0.297991
Os01g0618700	1.27338	1.49882	1.16819	ns	ns	ns	ns	-1.42094			Os01g0618700	0.629864	1.37414
Os01g0618800	0.268957	ns	ns	0.603629	ns	ns	ns	ns			Os01g0618800	0.436293	0.236649
Os01g0618900	ns	0.548697	ns	0.432069	ns	ns	ns	ns			Os01g0618900	0.490383	0.0824681
Os01g0619000	ns	ns	ns	0.678409	ns	ns	ns	0.508301			Os01g0619000	0.593355	0.120285
Os01g0619800	-0.481042	ns	-0.501632	-1.61173	ns	ns	ns	-0.991384			Os01g0619800	-0.896448	0.532005
Os01g0619900	2.42726	ns	3.20314	ns	ns	ns	1.81121	ns			Os01g0619900	2.48054	0.697494
Os01g0620100	ns	ns	0.585402	-1.0601	ns	ns	ns	-1.00005			Os01g0620100	-0.491583	0.933179
Os01g0620800	ns	-0.68562	-0.660784	ns	ns	-1.21088	-1.23431	ns			Os01g0620800	-0.947898	0.317498
Os01g0620900	ns	-0.713201	ns	-1.32879	-1.26567	-1.55536	-1.24215	-2.16707			Os01g0620900	-1.37871	0.475299
Os01g0621200	ns	ns	-1.21715	ns	ns	ns	-1.32061	ns			Os01g0621200	-1.26888	0.0731531
Os01g0621300	ns	ns	-0.595812	0.699507	ns	ns	-1.13107	ns			Os01g0621300	-0.342458	0.941219
Os01g0621400	ns	ns	ns	0.599089	ns	ns	ns	ns			Os01g0621400	0.599089	#DIV/0!
Os01g0621600	ns	ns	ns	1.39435	ns	ns	ns	ns			Os01g0621600	1.39435	#DIV/0!
Os01g0621700	ns	ns	ns	0.567556	ns	ns	ns	0.396567			Os01g0621700	0.482061	0.120908
Os01g0621900	ns	ns	ns	0.660015	ns	ns	ns	ns			Os01g0621900	0.660015	#DIV/0!
Os01g0622000	ns	ns	-0.728943	ns	ns	ns	-1.46332	ns			Os01g0622000	-1.09613	0.519285
Os01g0622033	ns	ns	-0.584491	ns	ns	ns	-1.05176	ns			Os01g0622033	-0.818124	0.330406
Os01g0622600	ns	ns	-0.64646	-0.26849	ns	ns	-0.592339	ns			Os01g0622600	-0.50243	0.204397
Os01g0622700	ns	0.849653	0.948789	0.575619	ns	ns	0.45266	ns			Os01g0622700	0.706681	0.231489
Os01g0623000	ns	ns	ns	1.01082	ns	ns	ns	0.836976			Os01g0623000	0.9239	0.122929
Os01g0623200	ns	ns	-2.09314	ns	ns	ns	ns	ns			Os01g0623200	-2.09314	#DIV/0!
Os01g0623500	ns	1.47771	ns	1.88376	-1.37708	ns	-1.14168	ns			Os01g0623500	0.210678	1.70826
Os01g0623550	ns	ns	ns	1.66683	ns	ns	-1.05205	ns			Os01g0623550	0.307391	1.92254
Os01g0623600	ns	-4.25012	-3.94678	-5.58221	ns	-2.47399	-2.38982	-4.03148			Os01g0623600	-3.77907	1.19986
Os01g0623750	ns	ns	ns	-2.0283	ns	ns	ns	ns			Os01g0623750	-2.0283	#DIV/0!
Os01g0623900	-1.14147	ns	-1.99221	-0.9252	-1.55988	ns	-2.41054	-1.27252			Os01g0623900	-1.5503	0.560436
Os01g0624000	ns	ns	ns	-0.65485	ns	ns	ns	ns			Os01g0624000	-0.65485	#DIV/0!
Os01g0624500	ns	ns	ns	ns	ns	ns	ns	0.554453			Os01g0624500	0.554453	#DIV/0!
Os01g0624700	1.71854	3.51075	1.88472	2.06243	ns	ns	ns	ns			Os01g0624700	2.29411	0.823158
Os01g0625200	-0.300342	-0.562308	-0.411844	-0.827948	ns	-0.746003	-0.634116	-1.01356			Os01g0625200	-0.642302	0.2448
Os01g0625300	0.796173	0.855751	1.0053	-0.892986	ns	ns	ns	-1.52274			Os01g0625300	0.0482998	1.17061
Os01g0625900	ns	ns	-1.00569	-1.03209	ns	ns	-0.997393	-1.01261			Os01g0625900	-1.01195	0.0148031
Os01g0626300	ns	-1.05084	ns	-0.78368	ns	ns	ns	ns			Os01g0626300	-0.917259	0.188909
Os01g0626400	-0.99844	ns	-1.8943	0.587232	ns	ns	-1.98499	ns			Os01g0626400	-1.07263	1.19278
Os01g0626500	-0.498599	-0.666422	ns	-0.326265	ns	ns	ns	ns			Os01g0626500	-0.497095	0.170083
Os01g0626900	ns	ns	ns	0.443929	ns	ns	ns	0.712488			Os01g0626900	0.578209	0.1899
Os01g0627400	-0.652217	ns	-0.768945	-2.10985	ns	ns	ns	-1.49113			Os01g0627400	-1.25553	0.679734
Os01g0627450	ns	ns	ns	-1.0243	ns	ns	ns	-0.885			Os01g0627450	-0.954649	0.0984989
Os01g0627500	ns	-0.96943	ns	ns	ns	ns	ns	ns			Os01g0627500	-0.96943	#DIV/0!
Os01g0627600	ns	2.41664	-1.46389	2.37825	-2.98515	ns	-3.71092	ns			Os01g0627600	-0.673014	2.9179
Os01g0627701	ns	3.37376	-0.950483	2.4086	-3.40603	ns	-3.30887	ns			Os01g0627701	-0.376604	3.15941
Os01g0627800	ns	ns	ns	5.73797	ns	ns	ns	ns			Os01g0627800	5.73797	#DIV/0!
Os01g0627900	ns	ns	-1.95249	0.934716	-3.81353	ns	-3.97876	ns			Os01g0627900	-2.20252	2.28438
Os01g0627916	ns	ns	ns	ns	ns	ns	-4.14788	ns			Os01g0627916	-4.14788	#DIV/0!
Os01g0627933	ns	ns	ns	ns	-2.23518	ns	ns	ns			Os01g0627933	-2.23518	#DIV/0!
Os01g0627967	ns	2.32992	ns	5.68196	-2.59115	ns	-3.20566	ns			Os01g0627967	0.553767	4.22204
Os01g0628000	ns	ns	ns	4.08516	ns	ns	ns	ns			Os01g0628000	4.08516	#DIV/0!
Os01g0628700	ns	ns	-0.931455	ns	ns	ns	ns	ns			Os01g0628700	-0.931455	#DIV/0!
Os01g0628900	ns	ns	ns	ns	ns	ns	-8.73295	ns			Os01g0628900	-8.73295	#DIV/0!
Os01g0629000	1.0017	-1.40517	ns	ns	1.61277	ns	ns	1.0958			Os01g0629000	0.576278	1.348
Os01g0629400	ns	ns	0.440428	ns	ns	ns	ns	ns			Os01g0629400	0.440428	#DIV/0!
Os01g0629500	-1.47771	ns	-1.09064	-2.36972	ns	ns	ns	-1.58459			Os01g0629500	-1.63067	0.536455
Os01g0629600	ns	ns	ns	1.22527	ns	ns	ns	1.44238			Os01g0629600	1.33382	0.153519
Os01g0629750	ns	ns	2.17116	-5.89092	ns	ns	1.99217	-5.98056			Os01g0629750	-1.92704	4.62957
Os01g0629900	ns	ns	ns	0.546312	-0.958652	ns	-0.815061	ns			Os01g0629900	-0.409134	0.830549
Os01g0630200	ns	ns	ns	3.02945	ns	ns	ns	ns			Os01g0630200	3.02945	#DIV/0!
Os01g0630300	ns	1.23559	ns	-0.817986	ns	ns	ns	-1.27848			Os01g0630300	-0.286956	1.33852
Os01g0631200	ns	ns	ns	0.796539	ns	ns	ns	ns			Os01g0631200	0.796539	#DIV/0!
Os01g0631400	2.02709	ns	ns	ns	ns	ns	ns	ns			Os01g0631400	2.02709	#DIV/0!
Os01g0631500	-0.336139	ns	ns	0.407008	ns	ns	ns	0.553301			Os01g0631500	0.208056	0.47693
Os01g0631700	ns	0.437627	ns	-1.51675	ns	ns	ns	-1.5414			Os01g0631700	-0.87351	1.13555
Os01g0631800	ns	1.53905	ns	2.57248	-1.63013	ns	-2.05398	ns			Os01g0631800	0.106855	2.29614
Os01g0631900	ns	ns	ns	-1.03919	ns	ns	ns	ns			Os01g0631900	-1.03919	#DIV/0!
Os01g0632000	ns	ns	ns	ns	ns	ns	ns	-1.48376			Os01g0632000	-1.48376	#DIV/0!
Os01g0632100	ns	ns	ns	ns	ns	ns	ns	-1.50525			Os01g0632100	-1.50525	#DIV/0!
Os01g0632700	ns	ns	-0.701628	-0.992302	ns	ns	ns	ns			Os01g0632700	-0.846965	0.205537
Os01g0633000	1.03826	ns	1.18016	0.500579	1.42087	ns	1.56685	0.915039			Os01g0633000	1.10363	0.38068
Os01g0633100	1.30814	ns	0.906746	1.83369	ns	ns	ns	1.82317			Os01g0633100	1.46793	0.447375
Os01g0633200	ns	ns	ns	-1.30862	ns	ns	ns	-1.05528			Os01g0633200	-1.18195	0.179135
Os01g0633400	1.75218	ns	ns	ns	ns	ns	ns	ns			Os01g0633400	1.75218	#DIV/0!
Os01g0633900	0.677469	ns	ns	0.953125	1.04305	ns	ns	1.3461			Os01g0633900	1.00494	0.275537
Os01g0634500	ns	ns	ns	-0.918198	ns	ns	ns	ns			Os01g0634500	-0.918198	#DIV/0!
Os01g0634600	-2.17899	ns	ns	ns	ns	ns	ns	ns			Os01g0634600	-2.17899	#DIV/0!
Os01g0635200	ns	1.69668	3.66152	ns	ns	ns	2.86073	ns			Os01g0635200	2.73964	0.988001
Os01g0635400	ns	-0.801903	-0.647567	-1.23807	ns	ns	ns	-0.791083			Os01g0635400	-0.869657	0.255486
Os01g0635550	ns	ns	ns	4.21174	ns	ns	ns	2.06468			Os01g0635550	3.13821	1.5182
Os01g0636100	ns	ns	ns	ns	ns	1.41918	ns	1.34561			Os01g0636100	1.3824	0.0520242
Os01g0636500	ns	-1.46341	-1.33551	ns	ns	ns	ns	ns			Os01g0636500	-1.39946	0.0904333
Os01g0636600	ns	ns	ns	-0.967321	ns	ns	ns	-0.924741			Os01g0636600	-0.946031	0.0301092
Os01g0636700	-0.494317	ns	ns	ns	-1.01518	ns	ns	ns			Os01g0636700	-0.754748	0.368304
Os01g0637300	-1.19879	-0.583636	-1.37724	-0.487362	-1.00033	ns	-1.16007	ns			Os01g0637300	-0.967905	0.357051
Os01g0637800	-2.65942	ns	-8.06185	-1.35836	ns	ns	-6.06122	ns			Os01g0637800	-4.53522	3.07554
Os01g0638000	ns	ns	-3.76943	2.63293	ns	ns	-3.59786	2.6052			Os01g0638000	-0.53229	3.63956
Os01g0638600	-2.45548	-1.73694	-0.976446	-3.51327	ns	ns	ns	-2.2028			Os01g0638600	-2.17699	0.935258
Os01g0639100	ns	ns	ns	-0.202248	ns	ns	0.363843	ns			Os01g0639100	0.0807975	0.400286
Os01g0639200	ns	ns	ns	1.49632	ns	ns	ns	0.986707			Os01g0639200	1.24151	0.360353
Os01g0639600	ns	1.68452	ns	2.00209	-1.77099	ns	-2.01625	ns			Os01g0639600	-0.0251569	2.16372
Os01g0639900	ns	ns	-0.347312	0.945812	ns	ns	ns	0.964616			Os01g0639900	0.521039	0.752072
Os01g0640000	ns	ns	ns	-1.56547	ns	ns	ns	ns			Os01g0640000	-1.56547	#DIV/0!
Os01g0640100	0.858378	-0.936281	ns	0.576664	ns	-1.21973	ns	ns			Os01g0640100	-0.180243	1.04941
Os01g0640700	ns	0.542584	ns	1.14395	ns	ns	ns	0.731762			Os01g0640700	0.806099	0.307499
Os01g0640800	ns	-0.732961	ns	ns	ns	ns	ns	ns			Os01g0640800	-0.732961	#DIV/0!
Os01g0641000	ns	ns	ns	0.680816	ns	ns	-1.46362	ns			Os01g0641000	-0.3914	1.51634
Os01g0641100	-0.662538	-0.805725	-0.608319	ns	ns	ns	ns	ns			Os01g0641100	-0.692194	0.101989
Os01g0641750	ns	ns	ns	1.87763	ns	ns	ns	ns			Os01g0641750	1.87763	#DIV/0!
Os01g0641800	ns	ns	ns	2.13547	-1.89707	ns	-1.57131	ns			Os01g0641800	-0.444303	2.24008
Os01g0642000	ns	ns	-1.47313	0.852622	-1.27593	ns	-2.11562	ns			Os01g0642000	-1.00302	1.28799
Os01g0642100	-1.01384	ns	-1.54725	0.81584	-1.96044	ns	-2.50663	ns			Os01g0642100	-1.24246	1.2743
Os01g0642200	2.01341	2.24347	2.88286	2.078	1.46837	1.74877	2.41506	1.64646			Os01g0642200	2.06205	0.456257
Os01g0642600	ns	ns	-1.46823	ns	ns	ns	-1.68322	ns			Os01g0642600	-1.57573	0.152024
Os01g0642801	-2.15649	ns	ns	ns	ns	ns	ns	ns			Os01g0642801	-2.15649	#DIV/0!
Os01g0642900	ns	-0.588723	-0.627834	ns	ns	ns	ns	ns			Os01g0642900	-0.608278	0.0276551
Os01g0643300	ns	-1.32825	-0.737978	ns	ns	-1.11241	ns	ns			Os01g0643300	-1.05955	0.298666
Os01g0643600	ns	ns	-1.60985	ns	-2.08963	ns	-3.19815	-1.76495			Os01g0643600	-2.16565	0.716776
Os01g0643800	-0.639234	ns	ns	-0.554295	ns	ns	ns	ns			Os01g0643800	-0.596765	0.0600612
Os01g0644200	ns	ns	ns	1.88392	ns	ns	-2.03294	ns			Os01g0644200	-0.074508	2.76964
Os01g0644400	ns	ns	ns	ns	-4.93513	ns	-5.65683	-6.20814			Os01g0644400	-5.60004	0.638403
Os01g0644500	ns	-12.6595	1.16933	-1.57686	ns	-12.4073	1.25842	-1.28502			Os01g0644500	-4.25015	6.52549
Os01g0644900	ns	-2.34841	-1.5811	ns	1.82265	ns	ns	1.82748			Os01g0644900	-0.0698479	2.21037
Os01g0645000	ns	-1.60594	ns	ns	1.70885	ns	ns	1.54607			Os01g0645000	0.549659	1.86858
Os01g0645900	0.746547	ns	ns	1.10124	0.693705	ns	ns	1.09864			Os01g0645900	0.910033	0.220347
Os01g0646300	1.0136	ns	1.20592	ns	ns	ns	ns	ns			Os01g0646300	1.10976	0.135993
Os01g0646400	ns	-11.0884	ns	ns	ns	-11.46	ns	ns			Os01g0646400	-11.2742	0.262795
Os01g0647000	ns	1.92411	ns	2.76914	ns	ns	-1.89525	ns			Os01g0647000	0.932664	2.48523
Os01g0647100	0.600667	1.12972	1.22191	1.06652	ns	ns	ns	ns			Os01g0647100	1.0047	0.27681
Os01g0647150	0.441957	1.07908	1.21446	1.18974	ns	ns	ns	ns			Os01g0647150	0.981309	0.364355
Os01g0647200	2.20374	ns	ns	ns	ns	ns	ns	ns			Os01g0647200	2.20374	#DIV/0!
Os01g0647700	ns	ns	-0.670256	ns	ns	ns	-1.02945	ns			Os01g0647700	-0.849852	0.253988
Os01g0647850	12.6848	13.792	ns	13.0221	12.6684	13.758	ns	13.0431			Os01g0647850	13.1614	0.501423
Os01g0648000	ns	1.8453	0.775541	ns	-1.18683	ns	ns	ns			Os01g0648000	0.478004	1.53781
Os01g0648225	ns	2.07147	ns	ns	ns	ns	ns	ns			Os01g0648225	2.07147	#DIV/0!
Os01g0648500	ns	-0.820951	ns	1.35797	ns	ns	ns	1.07995			Os01g0648500	0.53899	1.18592
Os01g0648700	ns	-1.66508	-0.772088	-2.32966	ns	ns	ns	-1.201			Os01g0648700	-1.49196	0.66698
Os01g0649000	-0.730259	-1.25382	-0.399142	-0.724899	ns	ns	ns	ns			Os01g0649000	-0.77703	0.353568
Os01g0649200	ns	ns	ns	0.730008	ns	ns	ns	0.520585			Os01g0649200	0.625297	0.148084
Os01g0649900	ns	-1.43345	-1.56304	ns	ns	ns	ns	ns			Os01g0649900	-1.49825	0.0916305
Os01g0650000	ns	-1.81417	-2.6428	ns	ns	ns	ns	ns			Os01g0650000	-2.22849	0.585925
Os01g0650100	ns	-2.79675	ns	ns	ns	ns	ns	ns			Os01g0650100	-2.79675	#DIV/0!
Os01g0650200	1.78874	ns	ns	2.25772	1.91006	ns	ns	2.41648			Os01g0650200	2.09325	0.293153
Os01g0650700	ns	ns	ns	-0.656752	ns	ns	ns	-0.841087			Os01g0650700	-0.74892	0.130345
Os01g0650800	ns	ns	ns	-0.533696	ns	ns	ns	ns			Os01g0650800	-0.533696	#DIV/0!
Os01g0651100	ns	ns	ns	-0.808864	ns	ns	ns	ns			Os01g0651100	-0.808864	#DIV/0!
Os01g0651800	ns	-0.933508	-0.834484	ns	ns	ns	ns	ns			Os01g0651800	-0.883996	0.07002
Os01g0651866	ns	ns	-2.9843	ns	ns	ns	-3.23113	ns			Os01g0651866	-3.10771	0.174532
Os01g0652100	ns	ns	ns	-1.1822	ns	ns	ns	-0.908531			Os01g0652100	-1.04537	0.193515
Os01g0652200	ns	ns	ns	-1.23203	ns	ns	ns	-1.1518			Os01g0652200	-1.19192	0.0567339
Os01g0652300	ns	ns	ns	0.873023	1.52936	ns	1.62356	1.62901			Os01g0652300	1.41374	0.363367
Os01g0652375	1.46468	ns	1.06987	0.920372	1.89606	ns	1.4936	1.37474			Os01g0652375	1.36989	0.344455
Os01g0652450	1.09468	ns	1.35406	1.12542	ns	ns	0.901684	0.729489			Os01g0652450	1.04107	0.236888
Os01g0652600	ns	ns	1.07787	-0.870602	ns	ns	1.001	-0.84087			Os01g0652600	0.0918492	1.09469
Os01g0652700	ns	3.34521	ns	ns	ns	2.52642	ns	ns			Os01g0652700	2.93582	0.578971
Os01g0652800	ns	ns	ns	-0.627869	ns	ns	ns	-0.706034			Os01g0652800	-0.666951	0.0552714
Os01g0653100	ns	ns	-1.2119	-2.42409	ns	ns	ns	-1.93393			Os01g0653100	-1.85664	0.60978
Os01g0653200	ns	-1.18249	-2.37268	-1.2373	ns	-1.3873	-2.62371	-1.43731			Os01g0653200	-1.7068	0.625163
Os01g0653300	ns	ns	ns	2.82767	ns	ns	ns	ns			Os01g0653300	2.82767	#DIV/0!
Os01g0653500	ns	ns	ns	5.05735	ns	ns	ns	2.55606			Os01g0653500	3.8067	1.76868
Os01g0653700	ns	0.427778	ns	0.431153	ns	ns	ns	ns			Os01g0653700	0.429466	0.00238619
Os01g0654200	ns	ns	0.808449	-0.497997	ns	ns	0.774553	ns			Os01g0654200	0.361668	0.744685
Os01g0654300	ns	ns	ns	ns	-0.529208	ns	ns	ns			Os01g0654300	-0.529208	#DIV/0!
Os01g0654650	ns	ns	ns	0.422427	ns	ns	ns	ns			Os01g0654650	0.422427	#DIV/0!
Os01g0654800	-1.5192	-1.64889	-1.85009	-1.87042	ns	ns	ns	-1.19474			Os01g0654800	-1.61667	0.277234
Os01g0654900	6.41457	ns	ns	5.78744	6.37786	ns	ns	5.88735			Os01g0654900	6.11681	0.32555
Os01g0655250	ns	ns	ns	0.590957	ns	ns	ns	ns			Os01g0655250	0.590957	#DIV/0!
Os01g0655300	ns	ns	ns	0.48859	ns	ns	-1.13629	ns			Os01g0655300	-0.323851	1.14897
Os01g0655500	1.49382	ns	ns	1.09657	ns	ns	ns	ns			Os01g0655500	1.2952	0.2809
Os01g0655800	-0.435305	ns	ns	-0.206479	-0.585646	ns	ns	ns			Os01g0655800	-0.409143	0.190933
Os01g0656200	0.925236	1.90866	ns	2.58847	ns	ns	-2.41905	ns			Os01g0656200	0.750827	2.22081
Os01g0656400	ns	3.10476	ns	2.73351	ns	ns	-1.46534	1.13193			Os01g0656400	1.37622	2.0788
Os01g0656600	ns	0.603135	1.03058	-0.444664	ns	ns	0.995135	ns			Os01g0656600	0.546046	0.688287
Os01g0656900	0.519145	ns	0.537529	ns	ns	ns	ns	ns			Os01g0656900	0.528337	0.0129999
Os01g0657100	ns	7.85262	ns	ns	ns	7.75496	ns	ns			Os01g0657100	7.80379	0.0690535
Os01g0657400	-0.949649	ns	-1.31583	-1.1227	ns	ns	-1.36159	-1.14267			Os01g0657400	-1.17849	0.16519
Os01g0657801	-1.13296	ns	-1.97962	-0.915245	ns	ns	-1.77998	-0.698513			Os01g0657801	-1.30126	0.554522
Os01g0658300	ns	ns	4.22062	ns	ns	ns	3.12539	-4.81413			Os01g0658300	0.843959	4.93056
Os01g0658400	ns	ns	0.675625	0.192024	ns	ns	0.658399	ns			Os01g0658400	0.508682	0.274369
Os01g0658450	ns	0.738418	0.597938	0.631288	ns	ns	ns	ns			Os01g0658450	0.655881	0.0733982
Os01g0658600	ns	ns	1.84033	3.80734	ns	ns	1.61951	3.53069			Os01g0658600	2.69947	1.12883
Os01g0658700	ns	ns	ns	-0.529025	-0.631469	ns	ns	-0.98152			Os01g0658700	-0.714005	0.23727
Os01g0658900	ns	ns	0.786983	-0.941218	ns	ns	ns	-1.64962			Os01g0658900	-0.601284	1.25336
Os01g0659200	ns	0.756809	1.17883	ns	ns	ns	1.06684	ns			Os01g0659200	1.00083	0.21862
Os01g0659400	ns	ns	ns	ns	-0.527742	ns	-0.389102	-0.869598			Os01g0659400	-0.595481	0.247307
Os01g0659800	-0.67118	-1.83122	-1.10391	-2.1	ns	ns	ns	-1.39138			Os01g0659800	-1.41954	0.568545
Os01g0659900	ns	ns	ns	0.554783	ns	ns	ns	ns			Os01g0659900	0.554783	#DIV/0!
Os01g0660000	ns	ns	ns	-6.41766	ns	-3.36429	ns	-7.99064			Os01g0660000	-5.9242	2.35232
Os01g0660100	ns	ns	ns	-4.61257	ns	ns	ns	-4.70774			Os01g0660100	-4.66016	0.0672955
Os01g0660200	-0.996111	ns	ns	-0.820842	-1.42111	ns	ns	-1.17213			Os01g0660200	-1.10255	0.256264
Os01g0660300	-0.589832	-1.16461	-1.13057	ns	ns	-0.711155	-0.69884	ns			Os01g0660300	-0.859001	0.267912
Os01g0660400	2.59946	2.73832	3.5856	ns	ns	ns	ns	-1.67044			Os01g0660400	1.81323	2.36299
Os01g0660450	ns	ns	6.38058	ns	ns	ns	6.33508	ns			Os01g0660450	6.35783	0.0321681
Os01g0660550	ns	ns	-1.00532	ns	ns	ns	-1.17003	ns			Os01g0660550	-1.08767	0.116465
Os01g0660700	ns	1.44291	1.88513	ns	ns	ns	ns	ns			Os01g0660700	1.66402	0.312692
Os01g0661000	ns	ns	-0.615631	0.583368	ns	ns	ns	ns			Os01g0661000	-0.0161315	0.847821
Os01g0661400	ns	-1.07334	-0.647058	-0.978561	ns	ns	ns	ns			Os01g0661400	-0.899653	0.223827
Os01g0661500	0.658414	0.573243	1.02764	-0.537542	ns	ns	0.606532	-0.908842			Os01g0661500	0.236574	0.770088
Os01g0661601	1.51249	1.26685	2.08892	0.843999	ns	ns	ns	ns			Os01g0661601	1.42807	0.51993
Os01g0661650	ns	ns	ns	-1.44443	ns	ns	ns	-1.78148			Os01g0661650	-1.61295	0.238335
Os01g0661750	ns	ns	ns	2.74497	ns	ns	ns	ns			Os01g0661750	2.74497	#DIV/0!
Os01g0662300	1.82433	1.14426	1.38272	1.67656	1.51154	ns	1.06673	1.42138			Os01g0662300	1.4325	0.270435
Os01g0662600	ns	ns	ns	0.407084	ns	ns	ns	0.445997			Os01g0662600	0.426541	0.0275151
Os01g0662700	1.08007	0.543339	1.00105	ns	1.06207	ns	0.981687	ns			Os01g0662700	0.933645	0.221994
Os01g0662800	ns	ns	ns	-1.28532	ns	ns	ns	-1.63532			Os01g0662800	-1.46032	0.247488
Os01g0663300	ns	ns	-2.20395	1.26726	-2.01257	-2.2331	-3.78144	ns			Os01g0663300	-1.79276	1.85269
Os01g0663400	-1.38166	ns	ns	-1.80711	ns	ns	ns	-1.1179			Os01g0663400	-1.43556	0.34775
Os01g0663500	-0.884409	ns	ns	-1.11775	ns	ns	ns	ns			Os01g0663500	-1.00108	0.164999
Os01g0663800	ns	ns	ns	0.275132	ns	ns	ns	ns			Os01g0663800	0.275132	#DIV/0!
Os01g0664000	ns	ns	ns	-0.779754	ns	ns	ns	ns			Os01g0664000	-0.779754	#DIV/0!
Os01g0664100	ns	ns	ns	1.18089	-1.23962	ns	-1.25847	ns			Os01g0664100	-0.439069	1.40295
Os01g0664200	ns	1.38453	ns	1.39176	ns	ns	ns	ns			Os01g0664200	1.38814	0.00511595
Os01g0664500	0.732176	ns	ns	0.912094	ns	ns	ns	ns			Os01g0664500	0.822135	0.127222
Os01g0665200	-0.411392	ns	ns	0.436797	-0.708466	ns	-0.636149	ns			Os01g0665200	-0.329802	0.526487
Os01g0665300	0.502067	1.42469	1.30037	0.996155	ns	ns	ns	ns			Os01g0665300	1.05582	0.410719
Os01g0665400	0.607091	ns	ns	ns	ns	ns	ns	ns			Os01g0665400	0.607091	#DIV/0!
Os01g0665500	1.1236	3.00056	1.00624	2.1182	ns	ns	ns	ns			Os01g0665500	1.81215	0.936229
Os01g0665750	ns	2.53167	0.562457	1.70418	ns	ns	ns	ns			Os01g0665750	1.59943	0.988773
Os01g0665900	1.78219	2.83448	1.34909	2.40036	0.867028	1.74411	ns	1.51778			Os01g0665900	1.78501	0.656488
Os01g0666000	ns	2.45243	ns	1.41127	-2.28433	ns	-1.4195	ns			Os01g0666000	0.0399686	2.25336
Os01g0666200	ns	ns	ns	-0.628931	ns	ns	ns	ns			Os01g0666200	-0.628931	#DIV/0!
Os01g0666400	ns	ns	ns	1.84245	ns	ns	ns	1.55483			Os01g0666400	1.69864	0.203377
Os01g0666500	0.497525	ns	0.384814	1.05093	ns	ns	ns	0.657955			Os01g0666500	0.647807	0.291183
Os01g0666600	1.30273	ns	ns	2.5809	ns	ns	ns	2.26825			Os01g0666600	2.05063	0.666293
Os01g0666800	ns	ns	ns	0.264977	ns	ns	ns	ns			Os01g0666800	0.264977	#DIV/0!
Os01g0666900	-0.379634	-0.765339	ns	-1.27015	ns	ns	ns	-0.856528			Os01g0666900	-0.817913	0.365541
Os01g0666950	-0.329974	-0.817067	-0.460632	-0.770975	ns	ns	ns	ns			Os01g0666950	-0.594662	0.237047
Os01g0667000	ns	ns	ns	2.8136	ns	ns	ns	ns			Os01g0667000	2.8136	#DIV/0!
Os01g0667100	ns	ns	ns	1.1226	ns	ns	ns	ns			Os01g0667100	1.1226	#DIV/0!
Os01g0667200	1.30827	0.933552	1.60588	0.835156	0.97856	ns	1.27504	0.546727			Os01g0667200	1.06903	0.351643
Os01g0667550	ns	ns	ns	1.09235	ns	ns	ns	ns			Os01g0667550	1.09235	#DIV/0!
Os01g0667600	ns	1.43929	ns	1.18402	ns	ns	ns	ns			Os01g0667600	1.31165	0.180502
Os01g0667700	0.371227	0.604982	0.445648	0.795481	ns	ns	ns	ns			Os01g0667700	0.554335	0.188023
Os01g0667725	1.04076	ns	ns	1.30611	ns	ns	ns	ns			Os01g0667725	1.17343	0.187632
Os01g0667800	-0.837665	-0.543067	ns	-2.28757	ns	ns	ns	-1.95381			Os01g0667800	-1.40553	0.845562
Os01g0667900	0.749909	2.61997	0.712064	1.56008	ns	ns	ns	ns			Os01g0667900	1.41051	0.896175
Os01g0668100	1.27643	0.743466	1.13985	-0.654131	1.56901	1.01902	1.43766	ns			Os01g0668100	0.933042	0.750802
Os01g0668400	ns	0.930535	0.759948	0.914803	-1.84428	ns	ns	ns			Os01g0668400	0.190252	1.35854
Os01g0668500	ns	ns	2.98191	3.80313	ns	ns	ns	ns			Os01g0668500	3.39252	0.58069
Os01g0668600	ns	ns	ns	-1.46526	ns	ns	ns	-1.38075			Os01g0668600	-1.423	0.059759
Os01g0668700	ns	ns	ns	0.439447	ns	ns	ns	ns			Os01g0668700	0.439447	#DIV/0!
Os01g0668901	ns	ns	ns	1.022	ns	ns	ns	1.49546			Os01g0668901	1.25873	0.334782
Os01g0669100	ns	ns	2.68022	ns	ns	ns	2.12974	ns			Os01g0669100	2.40498	0.389245
Os01g0670100	0.970895	1.64707	1.36129	0.564588	ns	1.13612	0.882719	ns			Os01g0670100	1.09378	0.379258
Os01g0670200	ns	0.962901	1.101	0.570918	-1.04563	ns	ns	ns			Os01g0670200	0.397297	0.987807
Os01g0670500	ns	1.14262	ns	2.8663	-1.18733	ns	-1.07105	1.16171			Os01g0670500	0.582451	1.71256
Os01g0670600	ns	1.49692	1.03564	2.06711	ns	ns	ns	0.980578			Os01g0670600	1.39506	0.504316
Os01g0670800	-0.494878	ns	-0.595623	ns	ns	ns	-0.648319	ns			Os01g0670800	-0.579607	0.0779643
Os01g0672100	ns	ns	ns	1.46516	ns	ns	ns	ns			Os01g0672100	1.46516	#DIV/0!
Os01g0672166	ns	ns	ns	-1.05805	ns	ns	ns	ns			Os01g0672166	-1.05805	#DIV/0!
Os01g0672300	ns	ns	ns	0.413079	ns	ns	ns	0.429488			Os01g0672300	0.421283	0.0116027
Os01g0672400	0.292092	1.46381	0.412953	1.55635	ns	ns	ns	ns			Os01g0672400	0.931302	0.6712
Os01g0672700	ns	ns	ns	-0.567953	ns	ns	ns	ns			Os01g0672700	-0.567953	#DIV/0!
Os01g0672800	ns	ns	0.357977	ns	ns	ns	ns	-0.53808			Os01g0672800	-0.0900513	0.633608
Os01g0673300	ns	ns	0.590848	ns	ns	ns	ns	ns			Os01g0673300	0.590848	#DIV/0!
Os01g0673500	ns	ns	0.729464	ns	ns	ns	0.641275	ns			Os01g0673500	0.68537	0.0623592
Os01g0673650	ns	ns	ns	2.25214	ns	ns	ns	ns			Os01g0673650	2.25214	#DIV/0!
Os01g0673700	ns	1.05274	ns	0.583259	ns	ns	ns	ns			Os01g0673700	0.817999	0.331972
Os01g0673800	0.44764	ns	ns	ns	ns	ns	ns	ns			Os01g0673800	0.44764	#DIV/0!
Os01g0674000	ns	0.855579	ns	1.08302	ns	ns	ns	ns			Os01g0674000	0.969301	0.160826
Os01g0674100	ns	ns	-0.979419	0.627528	ns	ns	-1.40293	ns			Os01g0674100	-0.584942	1.07117
Os01g0674450	ns	ns	ns	3.58369	ns	ns	ns	0.972783			Os01g0674450	2.27823	1.84619
Os01g0674500	0.41065	ns	0.619053	0.877913	ns	ns	ns	ns			Os01g0674500	0.635872	0.234085
Os01g0674700	ns	0.798063	0.556348	0.359362	ns	ns	ns	ns			Os01g0674700	0.571257	0.21973
Os01g0674800	0.731958	ns	ns	1.66851	ns	ns	ns	1.04761			Os01g0674800	1.14936	0.476494
Os01g0675000	ns	ns	ns	3.98218	ns	ns	ns	ns			Os01g0675000	3.98218	#DIV/0!
Os01g0675100	ns	ns	ns	0.966063	ns	ns	ns	0.871395			Os01g0675100	0.918729	0.0669405
Os01g0675400	ns	ns	ns	7.04827	ns	ns	ns	3.16323			Os01g0675400	5.10575	2.74714
Os01g0675500	ns	1.03187	0.444624	1.32334	ns	ns	ns	ns			Os01g0675500	0.933277	0.447578
Os01g0675700	0.580363	ns	0.528899	ns	0.535703	ns	0.488497	ns			Os01g0675700	0.533366	0.0376271
Os01g0675800	ns	2.12508	ns	2.10163	-1.61011	ns	-1.5268	ns			Os01g0675800	0.272452	2.12599
Os01g0676200	ns	0.749658	1.13208	-1.69708	ns	ns	1.36285	-1.271			Os01g0676200	0.0553012	1.43014
Os01g0676800	ns	ns	ns	3.02364	ns	ns	ns	5.76015			Os01g0676800	4.39189	1.935
Os01g0676900	-0.737047	ns	ns	ns	ns	ns	ns	ns			Os01g0676900	-0.737047	#DIV/0!
Os01g0677900	ns	ns	ns	ns	-1.23735	ns	ns	ns			Os01g0677900	-1.23735	#DIV/0!
Os01g0678000	ns	ns	ns	1.87044	ns	ns	ns	ns			Os01g0678000	1.87044	#DIV/0!
Os01g0678400	ns	4.08779	ns	3.71205	-2.90515	ns	-3.16494	ns			Os01g0678400	0.432435	4.00824
Os01g0678500	ns	ns	ns	-2.27425	ns	ns	ns	-1.87237			Os01g0678500	-2.07331	0.284176
Os01g0678600	1.32405	0.56016	1.64002	0.998869	1.43392	0.644056	1.75661	1.14716			Os01g0678600	1.18811	0.436564
Os01g0678700	ns	-1.05956	-0.611473	-2.511	ns	ns	ns	-1.93763			Os01g0678700	-1.52992	0.85509
Os01g0678800	ns	ns	0.70753	-1.17603	ns	ns	ns	ns			Os01g0678800	-0.234249	1.33188
Os01g0678900	ns	1.17848	1.6898	ns	ns	ns	ns	ns			Os01g0678900	1.43414	0.361562
Os01g0678950	ns	ns	1.574	ns	ns	ns	1.16354	ns			Os01g0678950	1.36877	0.290234
Os01g0679000	-0.392657	ns	ns	-1.32993	ns	ns	ns	-1.06555			Os01g0679000	-0.929377	0.483245
Os01g0679500	ns	2.19499	ns	ns	ns	ns	ns	-1.3187			Os01g0679500	0.438143	2.48455
Os01g0679550	ns	0.956577	ns	-1.00033	ns	ns	ns	-1.28732			Os01g0679550	-0.443689	1.22113
Os01g0679700	ns	-0.876531	-0.545881	-1.05498	ns	ns	ns	ns			Os01g0679700	-0.825798	0.258314
Os01g0679900	-0.666134	ns	-0.501401	ns	-0.610548	ns	ns	ns			Os01g0679900	-0.592695	0.0838051
Os01g0680000	ns	ns	ns	ns	ns	ns	-3.01193	ns			Os01g0680000	-3.01193	#DIV/0!
Os01g0680600	ns	0.183185	ns	ns	ns	ns	ns	ns			Os01g0680600	0.183185	#DIV/0!
Os01g0680650	ns	ns	3.07491	ns	ns	ns	ns	ns			Os01g0680650	3.07491	#DIV/0!
[truncated: 23,541 more rows]

## Sheet: union average_min2
OS_GENEID	average	sdtev
Os01g0541000	15.0112	0.0165634
Os01g0728400	14.9309	0.0891272
Os01g0942900	14.8959	2.07341
Os01g0943800	14.6934	2.07059
Os07g0258100	14.6347	0.372205
Os11g0256300	14.5174	0.0566328
Os11g0696600	14.4149	0.828627
Os05g0546800	14.2279	0.00611568
Os01g0944200	14.198	3.4221
Os05g0547600	14.0862	0.0137097
Os11g0588600	13.8933	0.0218704
Os09g0566400	13.8831	0.00860388
Os01g0538000	13.8795	2.24586
Os02g0262800	13.8281	0.0258136
Os10g0163250	13.8227	0.0109485
Os03g0575500	13.8174	2.70491
Os12g0132000	13.734	0.721958
Os02g0825500	13.7085	0.79056
Os01g0943000	13.6992	0.0114141
Os06g0491800	13.6821	0.0933839
Os06g0580100	13.6693	0.411489
Os01g0943900	13.6599	0.012282
Os01g0947700	13.5539	0.00636854
Os01g0544700	13.42	1.03226
Os07g0236200	13.4178	0.37972
Os05g0547100	13.3152	0.0177181
Os02g0163400	13.3024	0.927158
Os09g0373800	13.2875	0.0224836
Os11g0297000	13.2769	0.98388
Os08g0363000	13.2275	0.148445
Os09g0436600	13.2053	0.0154388
Os11g0206000	13.2031	2.58483
Os01g0647850	13.1614	0.501423
Os09g0369400	13.1506	0.975214
Os06g0713400	13.0869	0.0146566
Os10g0131850	13.0314	2.81194
Os02g0163500	13.0139	0.187554
Os12g0203200	13.0071	0.10282
Os10g0136100	12.9913	0.0146527
Os12g0599625	12.9085	3.5106
Os03g0846200	12.864	0.0091415
Os02g0435400	12.8508	0.0186001
Os06g0731950	12.8506	0.047812
Os01g0518800	12.8202	0.0311611
Os12g0103580	12.795	0.957792
Os04g0330301	12.776	2.55292
Os11g0605100	12.7699	2.40995
Os11g0308100	12.7497	2.55945
Os01g0967600	12.7379	1.26156
Os11g0256400	12.7288	0.117849
Os12g0272500	12.7205	0.282626
Os06g0713300	12.6444	0.0234306
Os12g0254400	12.5467	0.0154715
Os09g0337300	12.511	1.93464
Os02g0163300	12.459	1.54558
Os02g0163533	12.368	0.256176
Os03g0390900	12.3562	0.0774657
Os09g0336600	12.2952	0.0734901
Os07g0434100	12.2743	0.0161058
Os04g0173300	12.2401	0.0170798
Os09g0372100	12.1979	0.0145892
Os01g0584300	12.1645	0.0230941
Os07g0582800	12.1537	1.10356
Os02g0435600	12.152	0.0127307
Os11g0687800	12.1472	0.0125496
Os01g0523000	12.1184	0.54098
Os12g0180900	12.1174	0.0150871
Os07g0549300	12.1024	0.261768
Os01g0158500	12.0858	0.0626812
Os10g0428200	12.0756	1.71922
Os10g0529800	12.0103	0.0107142
Os10g0322300	12.0095	0.128139
Os08g0125250	12.0032	0.470161
Os07g0220000	11.9717	2.44203
Os01g0540800	11.9665	3.07983
Os01g0879000	11.9504	0.725309
Os08g0301600	11.9112	2.74695
Os03g0382350	11.9084	0.972773
Os09g0436000	11.875	0.0158183
Os07g0255300	11.8692	0.174564
Os08g0330800	11.8586	0.0171965
Os11g0550500	11.845	0.537107
Os08g0124500	11.8001	0.557761
Os12g0547100	11.799	0.0150346
Os03g0582550	11.7906	0.0368803
Os11g0618700	11.7863	1.78867
Os06g0635500	11.7837	0.711758
Os01g0366100	11.766	0.559156
Os01g0587900	11.6845	0.012986
Os02g0727200	11.6773	0.0192303
Os11g0702000	11.6716	0.0119644
Os08g0185701	11.6392	0.2734
Os07g0528400	11.629	0.0269829
Os05g0155000	11.6222	2.2478
Os04g0325300	11.6202	1.91031
Os06g0240400	11.5786	0.542011
Os08g0226600	11.5517	0.0127881
Os03g0575700	11.5077	0.015851
Os01g0967400	11.4928	0.309204
Os01g0362400	11.4567	1.44696
Os11g0598200	11.4479	0.0115064
Os12g0545900	11.4446	0.0180659
Os11g0661900	11.4245	1.02424
Os02g0303200	11.4166	0.0163485
Os05g0547700	11.4089	0.620383
Os04g0405401	11.3773	0.015524
Os01g0521200	11.3673	0.867607
Os08g0263300	11.3358	1.21709
Os03g0667300	11.3349	2.07582
Os12g0621300	11.3228	0.012148
Os12g0483600	11.2972	0.0164883
Os08g0123833	11.2862	4.73261
Os10g0366400	11.2462	0.0130897
Os05g0297001	11.241	1.93028
Os11g0628000	11.1984	0.0113228
Os12g0109600	11.1862	0.439725
Os08g0454600	11.1807	0.0194272
Os09g0340400	11.162	0.992449
Os02g0163600	11.158	1.36818
Os09g0322500	11.154	2.08794
Os07g0236300	11.1423	0.125219
Os11g0579300	11.0921	0.0198992
Os01g0511700	11.0721	0.518678
Os12g0199200	11.0568	0.0122038
Os07g0230400	11.046	1.09719
Os10g0137300	11.0241	2.92256
Os11g0585200	10.9846	0.0206246
Os04g0420500	10.9785	0.0196925
Os01g0530100	10.965	0.46476
Os08g0236900	10.9437	0.645269
Os12g0197200	10.9427	2.9974
Os02g0807600	10.9351	0.0123318
Os06g0271400	10.9086	0.0118256
Os03g0233200	10.9051	0.802801
Os07g0219250	10.8963	1.51176
Os08g0383750	10.8899	0.457556
Os01g0612350	10.8828	0.227171
Os03g0441101	10.8753	0.0186473
Os05g0550650	10.8624	0.30254
Os01g0802400	10.8619	0.912393
Os05g0226000	10.8317	0.0200951
Os12g0425800	10.8144	2.48902
Os04g0429450	10.8095	0.624913
Os03g0754300	10.8078	0.0230805
Os08g0140700	10.7979	0.0152294
Os12g0564800	10.7963	1.19706
Os12g0472366	10.7929	1.72014
Os11g0202600	10.7886	1.54972
Os11g0608000	10.7742	2.96589
Os12g0226400	10.7737	3.13985
Os12g0254601	10.772	0.0145537
Os04g0152500	10.7586	1.89131
Os05g0389900	10.7407	0.881017
Os04g0677000	10.7387	0.00781864
Os04g0121900	10.7178	0.014847
Os06g0139150	10.6995	0.462356
Os09g0565000	10.6912	0.124697
Os01g0382200	10.6669	0.00713359
Os01g0359800	10.6559	4.45537
Os06g0138900	10.648	0.44232
Os08g0426000	10.6363	0.0144404
Os11g0550100	10.6218	0.885539
Os08g0235550	10.6106	0.0097543
Os09g0471500	10.6073	1.64243
Os03g0700500	10.6034	0.0135971
Os07g0445450	10.5823	0.0125858
Os11g0618300	10.573	0.15007
Os06g0682300	10.5657	7.92847
Os01g0862500	10.553	0.0135039
Os03g0643900	10.5508	1.42856
Os06g0178650	10.545	0.0218885
Os08g0170100	10.5412	0.410738
Os04g0170500	10.5389	3.88412
Os07g0219400	10.5107	2.11966
Os07g0648566	10.494	1.25173
Os07g0658550	10.4873	1.01038
Os04g0330900	10.487	0.0194455
Os12g0426750	10.4773	0.0211189
Os08g0233000	10.4526	1.67688
Os07g0226200	10.4403	0.449121
Os11g0606300	10.44	0.0236934
Os06g0178601	10.4357	0.244238
Os11g0676500	10.4217	0.113594
Os07g0219300	10.3742	1.3904
Os03g0415351	10.3715	1.67316
Os11g0686100	10.369	2.67956
Os11g0229600	10.3582	0.215395
Os03g0754200	10.3499	0.00938924
Os04g0170166	10.3422	0.0136954
Os12g0197600	10.3357	0.0162143
Os06g0699301	10.321	1.57573
Os06g0176801	10.3192	0.157363
Os11g0664500	10.3181	0.967686
Os03g0787500	10.3112	0.0170164
Os04g0411651	10.3073	0.0207546
Os05g0237400	10.3014	2.183
Os06g0184834	10.27	1.63345
Os11g0616100	10.25	1.31241
Os03g0697466	10.2399	0.129744
Os07g0617600	10.2239	0.0121314
Os10g0491100	10.2043	2.63192
Os07g0103000	10.1995	2.22923
Os05g0361500	10.1966	1.01558
Os01g0162701	10.1908	0.37646
Os09g0523700	10.1554	0.579346
Os05g0418600	10.1483	0.0178818
Os12g0549700	10.1374	1.20836
Os02g0264700	10.1287	1.65368
Os03g0812500	10.1246	0.754538
Os03g0598002	10.1214	0.497001
Os04g0127200	10.113	0.160192
Os11g0150800	10.1064	0.0184884
Os12g0210601	10.1012	2.12892
Os07g0140566	10.0759	1.00561
Os01g0601700	10.07	1.37982
Os04g0380000	10.0586	0.819018
Os02g0216100	10.0545	0.0527989
Os10g0450400	10.0325	0.0952886
Os12g0255200	10.0201	0.0135628
Os01g0879100	10.0079	0.35947
Os03g0422300	10.0073	1.65178
Os11g0258900	10.0045	1.2465
Os10g0365800	9.97399	1.60788
Os03g0582900	9.97219	3.39622
Os08g0369400	9.97141	0.0267584
Os07g0555850	9.97086	0.0403816
Os11g0229500	9.96068	0.80175
Os04g0489900	9.9398	0.0172378
Os06g0176850	9.92898	0.162621
Os09g0463800	9.88775	0.29829
Os12g0276550	9.88236	0.0117637
Os01g0366300	9.86692	0.358344
Os08g0363200	9.86363	4.19948
Os11g0146200	9.85182	0.85998
Os01g0946200	9.81852	0.0208561
Os05g0447800	9.81616	2.13215
Os11g0462900	9.81412	4.35986
Os09g0116600	9.81399	2.61192
Os11g0204600	9.81392	0.0240565
Os08g0185900	9.80734	0.189903
Os07g0232300	9.80039	1.35988
Os03g0708250	9.79432	8.30713
Os10g0571900	9.79328	0.0164905
Os12g0553800	9.7885	2.58181
Os11g0438000	9.78485	2.21808
Os02g0614966	9.76865	0.0158081
Os10g0552700	9.76384	0.959001
Os08g0263400	9.76242	3.51172
Os04g0420600	9.73953	0.477199
Os04g0660900	9.7339	1.6562
Os09g0339601	9.71873	0.0176917
Os12g0222650	9.71787	0.209745
Os12g0448400	9.70308	0.862158
Os08g0170200	9.69745	0.0220593
Os05g0199700	9.6903	0.0263635
Os05g0439200	9.67884	2.60938
Os12g0434601	9.65382	0.434297
Os07g0468900	9.64888	1.35083
Os09g0450700	9.64439	2.87809
Os11g0245900	9.63902	0.611395
Os12g0142900	9.63556	0.606328
Os11g0574200	9.61232	0.0129389
Os08g0255500	9.61176	0.0225333
Os01g0116000	9.60944	0.0224602
Os03g0673600	9.60932	2.37066
Os11g0485900	9.60693	1.58656
Os04g0172100	9.5734	0.0147767
Os10g0359700	9.56523	0.0261675
Os11g0618500	9.55749	1.62878
Os06g0241200	9.54537	1.48503
Os11g0223000	9.54409	0.0285729
Os12g0451300	9.53964	0.166928
Os08g0122201	9.51267	3.35609
Os03g0797500	9.51019	0.0209106
Os12g0545600	9.50129	3.19249
Os01g0158600	9.50039	0.431341
Os07g0658500	9.49071	0.264455
Os01g0201500	9.48281	0.0526826
Os12g0117900	9.47975	0.0149642
Os11g0697001	9.47552	0.478516
Os12g0518000	9.46263	0.0163271
Os06g0637800	9.44359	0.0173835
Os03g0180500	9.44341	1.04391
Os07g0273000	9.42091	0.769662
Os09g0471550	9.41533	1.85443
Os07g0456033	9.39144	2.19146
Os08g0246400	9.39114	0.0183731
Os11g0579100	9.34293	0.0202211
Os11g0690066	9.34274	2.45532
Os11g0459400	9.34226	0.0173405
Os11g0212000	9.33728	4.88834
Os02g0216150	9.32504	0.0491221
Os10g0569500	9.32431	2.10458
Os09g0322400	9.32014	0.5028
Os08g0236866	9.3067	1.39124
Os02g0433900	9.30154	2.34427
Os11g0503400	9.28265	3.20885
Os09g0561000	9.26102	0.410543
Os08g0125200	9.25691	3.91242
Os03g0400600	9.22967	1.06826
Os11g0579200	9.22061	0.0165729
Os06g0510200	9.21274	0.352293
Os04g0616400	9.20681	0.0170939
Os01g0940700	9.19662	2.59111
Os09g0344650	9.18569	1.96321
Os04g0370300	9.17054	1.76967
Os11g0550300	9.15409	1.05535
Os07g0115200	9.14882	0.371408
Os01g0690900	9.13479	0.805373
Os04g0367800	9.1342	1.27946
Os07g0111800	9.12532	0.0155367
Os08g0392700	9.1243	0.380268
Os01g0370750	9.11172	1.95928
Os01g0361000	9.09284	3.42259
Os01g0961000	9.09259	2.38098
Os09g0357300	9.08766	0.0532745
Os05g0538500	9.07024	0.0192991
Os07g0140633	9.06891	2.40155
Os01g0944100	9.05948	3.41883
Os12g0218600	9.04001	0.0161703
Os06g0218200	9.03663	2.66493
Os10g0499200	9.02626	0.0217271
Os12g0244000	9.02512	0.0294193
Os06g0329350	9.02038	0.0179613
Os06g0614550	9.00553	3.24322
Os07g0521400	8.97764	0.346878
Os12g0250700	8.93079	0.0155626
Os06g0648600	8.92685	0.380644
Os12g0549800	8.92336	1.61728
Os03g0732200	8.91599	1.54737
Os11g0204100	8.91056	0.293571
Os11g0661800	8.8933	0.0520341
Os01g0115700	8.89324	0.435708
Os08g0231400	8.89266	6.88144
Os01g0791033	8.8905	2.64305
Os05g0533400	8.89006	0.0139711
Os07g0482566	8.88009	0.0184639
Os07g0653300	8.87857	0.517966
Os12g0199100	8.86219	2.54438
Os04g0192775	8.85794	0.340815
Os03g0609000	8.85666	0.417113
Os04g0166300	8.85228	1.55035
Os11g0576975	8.8242	1.13306
Os12g0541200	8.81285	2.47306
Os11g0622200	8.79738	0.0386304
Os01g0967000	8.77778	1.57118
Os01g0539900	8.7598	5.133
Os03g0104901	8.73364	3.23023
Os02g0169700	8.71089	2.09924
Os11g0639100	8.69621	1.33693
Os12g0141900	8.69003	0.559201
Os04g0205200	8.68869	0.0542038
Os02g0308400	8.68726	0.0262735
Os04g0676800	8.68603	1.53527
Os09g0353400	8.67655	2.05348
Os01g0117050	8.67564	0.162854
Os08g0260800	8.67154	0.0249569
Os06g0634700	8.64928	0.0171575
Os05g0330150	8.64373	2.66372
Os06g0118301	8.63871	2.24799
Os03g0164200	8.62256	1.30163
Os01g0158566	8.60912	0.709137
Os05g0545900	8.60395	0.0164954
Os05g0349400	8.59505	1.25047
Os12g0222900	8.57685	0.415191
Os09g0268800	8.57643	1.15667
Os09g0453200	8.57154	2.33842
Os02g0330601	8.56436	0.0179735
Os05g0114800	8.56432	0.0224688
Os10g0135833	8.55026	0.0158315
Os11g0687001	8.51925	2.33582
Os04g0172400	8.51513	0.507306
Os08g0244750	8.51105	0.0182387
Os12g0204600	8.50835	2.15628
Os01g0152200	8.50711	1.15382
Os02g0282500	8.50372	2.77239
Os06g0233950	8.4993	0.015416
Os12g0509200	8.49279	4.01218
Os06g0524700	8.47234	0.340046
Os11g0481500	8.45585	0.0222234
Os12g0435000	8.44531	3.48673
Os07g0515700	8.44077	0.555985
Os03g0422200	8.43949	1.58233
Os08g0165901	8.43336	6.56064
Os11g0223400	8.42628	6.79816
Os12g0203900	8.42368	3.94081
Os01g0369600	8.41887	3.84353
Os05g0329700	8.40585	0.783657
Os07g0596200	8.38141	0.0251417
Os11g0689000	8.37889	0.259454
Os11g0223201	8.37624	6.80635
Os11g0625900	8.37578	0.0323945
Os08g0517150	8.36453	0.0185849
Os07g0541600	8.35942	0.398912
Os04g0632350	8.35709	2.02762
Os12g0180600	8.35491	1.50803
Os12g0226700	8.35369	0.0140821
Os04g0295901	8.34647	1.54462
Os06g0344201	8.34562	1.99401
Os07g0237700	8.33854	0.145581
Os08g0332100	8.33507	0.0172615
Os05g0211100	8.32407	0.0134247
Os11g0698567	8.2983	0.475652
Os06g0492700	8.28326	1.41805
Os07g0252200	8.28262	1.2639
Os12g0223000	8.27967	0.0683121
Os08g0186200	8.26825	0.741687
Os12g0520200	8.25887	0.0484879
Os11g0460700	8.25122	4.83957
Os04g0163700	8.23938	0.310196
Os04g0648400	8.22826	1.31696
Os11g0675200	8.22485	1.52842
Os09g0330000	8.21145	1.38866
Os07g0252300	8.2104	1.01304
Os07g0228000	8.20025	1.01458
Os12g0254825	8.19983	0.0154099
Os11g0696900	8.19513	0.0220235
Os07g0191401	8.19025	0.70122
Os06g0238600	8.18327	1.28826
Os10g0162842	8.17872	0.0149117
Os07g0521800	8.17614	0.848087
Os06g0630850	8.16161	0.0158765
Os06g0287700	8.14137	2.81742
Os11g0666000	8.13178	0.805725
Os11g0688200	8.12375	0.015524
Os04g0143566	8.11746	1.23499
Os01g0360100	8.11461	0.652199
Os12g0249100	8.10722	2.1356
Os07g0599600	8.10646	0.0238593
Os01g0359600	8.09561	1.37107
Os04g0616282	8.07744	0.0277135
Os07g0650200	8.05281	2.85028
Os06g0492000	8.05265	4.18116
Os06g0271500	8.05011	1.0422
Os12g0563000	8.03258	3.47541
Os11g0578250	8.0282	0.0164733
Os12g0509900	8.015	3.80326
Os06g0491901	8.00904	4.0849
Os04g0521100	7.98417	2.26331
Os02g0768400	7.98046	3.99166
Os02g0467200	7.97887	1.94087
Os09g0272900	7.96033	0.0231855
Os07g0521600	7.94917	4.613
Os02g0467400	7.94747	1.46997
Os05g0225800	7.94676	0.0251035
Os11g0249600	7.94049	1.17725
Os10g0109600	7.9293	3.2408
Os07g0651800	7.91868	0.0293355
Os06g0270950	7.91787	1.22696
Os12g0204200	7.89429	3.14852
Os05g0217800	7.89179	4.54953
Os11g0201401	7.89115	0.0226537
Os11g0249400	7.88743	1.17722
Os05g0232632	7.88591	0.0193864
Os09g0430701	7.87429	0.0197455
Os08g0132000	7.86735	0.546947
Os01g0101150	7.85579	4.80891
Os04g0630700	7.85004	0.0250618
Os01g0952000	7.83372	5.31484
Os02g0213450	7.83312	3.35227
Os01g0967700	7.83231	0.0172977
Os05g0171000	7.82648	0.00309832
Os12g0573900	7.81839	2.86685
Os11g0617800	7.80454	0.0220098
Os01g0657100	7.80379	0.0690535
Os01g0862400	7.79766	3.38829
Os11g0532600	7.77747	5.89686
Os02g0702700	7.77082	0.510022
Os09g0241700	7.76856	3.83474
Os12g0186600	7.76186	0.755671
Os01g0964333	7.7549	1.66392
Os12g0111000	7.75325	0.431448
Os08g0123600	7.74808	2.12489
Os10g0389300	7.74316	8.65116
Os12g0172150	7.73753	0.613429
Os04g0545600	7.73187	1.48686
Os05g0329200	7.72243	0.855535
Os03g0117432	7.71999	6.19285
Os05g0581000	7.71472	0.558762
Os10g0388701	7.70215	0.359098
Os11g0275500	7.69666	2.87336
Os03g0365200	7.68473	4.57036
Os01g0162800	7.67871	0.024655
Os11g0481600	7.67719	0.0227837
Os11g0274100	7.66837	4.80752
Os08g0240000	7.64723	0.165292
Os11g0691600	7.64124	0.0369679
Os01g0596425	7.64108	0.621201
Os12g0440300	7.60596	2.34031
Os12g0267400	7.58767	1.38282
Os01g0691050	7.58729	1.9934
Os06g0240001	7.58682	2.21969
Os09g0314800	7.55878	0.973749
Os07g0642100	7.54878	0.546813
Os01g0280200	7.548	2.06005
Os02g0807300	7.5479	0.0228497
Os12g0466200	7.54753	0.0616138
Os04g0345700	7.5439	1.53726
Os02g0445300	7.52248	0.568708
Os10g0525200	7.51119	0.0286691
Os06g0100550	7.50832	0.326601
Os03g0372950	7.50473	4.32079
Os12g0548800	7.50345	5.4957
Os12g0257900	7.49715	1.88896
Os11g0697350	7.49183	1.25599
Os01g0781833	7.47796	4.20904
Os01g0124900	7.47286	0.438879
Os07g0242050	7.47186	3.3608
Os11g0422000	7.46621	0.021149
Os11g0694500	7.46523	1.4559
Os07g0113100	7.45888	0.0368728
Os08g0124533	7.45022	5.36327
Os01g0921000	7.44578	0.0191737
Os01g0520800	7.44391	0.440226
Os07g0537701	7.44342	2.03164
Os06g0484950	7.44146	2.86548
Os11g0690154	7.43933	0.026961
Os04g0323800	7.43147	1.61175
Os09g0550500	7.42218	0.869377
Os09g0531701	7.4132	1.20648
Os11g0462850	7.41165	0.0200927
Os01g0937025	7.40786	1.73964
Os12g0250900	7.4027	0.518662
Os08g0184300	7.40077	2.35467
Os03g0426350	7.39961	6.16113
Os05g0217700	7.39818	3.28781
Os08g0124050	7.37883	5.23244
Os01g0945600	7.37492	2.17125
Os11g0249700	7.36545	1.48217
Os11g0616700	7.3647	0.0191359
Os06g0100700	7.36204	0.44888
Os09g0375700	7.3588	1.08518
Os01g0581800	7.35219	0.0208358
Os08g0396200	7.34524	0.674678
Os08g0238700	7.34314	0.330021
Os02g0566000	7.34156	0.0255078
Os07g0270800	7.3382	5.19251
Os06g0325900	7.32628	2.51352
Os01g0370900	7.3108	1.80379
Os02g0581600	7.30162	0.355278
Os05g0267766	7.28782	0.0715368
Os07g0169800	7.28743	0.0178798
Os11g0126800	7.28483	0.434341
Os02g0807750	7.27625	0.715669
Os02g0223300	7.27549	0.0622409
Os11g0702501	7.26776	2.11921
Os02g0313450	7.26026	3.77422
Os07g0646700	7.25089	0.907735
Os02g0596200	7.24763	1.21995
Os12g0234800	7.24718	3.28834
Os09g0486375	7.2438	0.022499
Os11g0251200	7.23198	1.21591
Os12g0510000	7.2296	0.377447
Os11g0590400	7.22555	2.07937
Os04g0621100	7.2159	0.414043
Os12g0518200	7.2096	4.45059
Os11g0493100	7.1952	3.45658
Os11g0250600	7.18756	0.421903
Os07g0142200	7.18511	2.95137
Os08g0226800	7.17423	2.73589
Os04g0617200	7.16894	0.0358477
Os04g0162701	7.16508	3.35576
Os12g0222800	7.15947	0.184956
Os01g0781600	7.14666	4.27867
Os11g0691650	7.13859	0.0268967
Os08g0280150	7.13771	0.256486
Os06g0732000	7.12943	0.511119
Os09g0433400	7.12151	0.0200785
Os01g0731600	7.11519	0.967178
Os02g0467300	7.11125	0.621137
Os03g0643433	7.10661	0.94024
Os02g0223200	7.10312	1.91135
Os01g0309451	7.10053	0.573762
Os03g0562400	7.08675	0.709937
Os03g0657400	7.08467	0.0245274
Os11g0471200	7.08216	0.019635
Os09g0290900	7.08215	2.41394
Os05g0330600	7.07608	0.0919337
Os09g0436200	7.07223	1.47172
Os11g0558200	7.06612	2.45506
Os12g0565100	7.06384	5.59635
Os10g0318900	7.05483	0.50809
Os11g0231200	7.03305	1.53141
Os06g0470500	7.03091	0.419857
Os01g0947833	7.02388	0.021595
Os11g0687900	7.01439	0.0253597
Os04g0475900	7.00926	0.030733
Os11g0577700	6.99695	0.0480826
Os11g0212100	6.9956	1.96316
Os11g0578225	6.99282	0.0280095
Os02g0584200	6.98596	1.8321
Os11g0527250	6.98357	3.09676
Os09g0415400	6.98187	0.0181313
Os03g0573750	6.97666	1.28502
Os12g0267500	6.9765	2.443
Os12g0447466	6.9761	5.54181
Os04g0163800	6.97599	0.0531426
Os07g0407700	6.95629	8.75853
Os04g0414700	6.94763	5.12826
Os03g0658000	6.94162	0.0443582
Os08g0105700	6.93886	3.57306
Os04g0194000	6.9337	5.15642
Os11g0119200	6.92375	0.261727
Os07g0237900	6.92322	1.00775
Os07g0564533	6.92322	2.20221
Os02g0103800	6.92238	3.86197
Os08g0200300	6.92236	1.78646
Os07g0144732	6.90088	2.62001
Os01g0562600	6.9002	2.01102
Os07g0599500	6.89795	0.0241607
Os08g0507000	6.88813	2.7211
Os08g0346800	6.88123	4.4223
Os08g0234400	6.87945	0.0188387
Os07g0146700	6.87659	0.0170609
Os09g0274800	6.87282	0.885781
Os12g0515800	6.87215	0.0474531
Os06g0185400	6.86602	0.0376977
Os08g0108001	6.86343	0.0210401
Os03g0610800	6.86253	0.708371
Os03g0735400	6.86116	0.637556
Os01g0391800	6.85999	0.619035
Os07g0532600	6.85611	1.50106
Os08g0189500	6.84923	4.77111
Os12g0145566	6.84058	0.492254
Os02g0288700	6.83987	0.0252159
Os01g0162900	6.83435	4.10762
Os11g0234001	6.83346	0.0219999
Os08g0344800	6.83225	2.21041
Os12g0211000	6.81666	1.75202
Os01g0562400	6.81464	4.27528
Os12g0541250	6.81138	0.0463195
Os08g0207800	6.80803	3.07642
Os04g0598500	6.80701	2.05191
Os12g0472300	6.79923	5.233
Os09g0517950	6.797	0.0835878
Os05g0436700	6.79603	0.252248
Os09g0531650	6.79016	3.07844
Os01g0539400	6.77179	4.17629
Os01g0352100	6.7703	0.182788
Os06g0325950	6.76447	2.9277
Os03g0689544	6.76231	4.93678
Os11g0460500	6.75757	0.85778
Os04g0307500	6.73694	1.03955
Os10g0111400	6.73388	0.0272454
Os03g0817700	6.72896	2.03658
Os11g0591550	6.70654	0.00614143
Os03g0162300	6.70346	0.0206242
Os07g0295601	6.70121	1.44574
Os11g0294800	6.69375	2.027
Os06g0700750	6.68447	1.99488
Os10g0388500	6.6842	1.84379
Os03g0558400	6.67917	1.03458
Os06g0254901	6.66758	0.0451005
Os08g0124000	6.66739	1.0416
Os12g0132500	6.66654	1.30941
Os01g0362800	6.66535	1.42733
Os09g0343200	6.65777	1.00006
Os08g0361300	6.65747	0.75347
Os01g0550800	6.6562	3.51566
Os11g0486000	6.65416	1.50964
Os06g0132801	6.65406	0.0257661
Os06g0295000	6.64199	4.17025
Os06g0585950	6.64015	2.22496
Os07g0271550	6.63257	1.38063
Os09g0356800	6.62646	0.0679124
Os01g0117600	6.61958	0.0200476
Os03g0271800	6.61213	0.82993
Os12g0454800	6.61185	1.57889
Os12g0222300	6.60697	3.54539
Os04g0435000	6.60227	2.6842
Os07g0482433	6.59158	0.0424927
Os03g0592500	6.59058	1.4258
Os12g0609200	6.58297	1.09697
Os07g0653100	6.58037	1.18732
Os04g0197500	6.58021	2.21474
Os07g0582700	6.57507	0.69524
Os03g0637600	6.56856	3.20442
Os03g0143150	6.56629	0.0943601
Os06g0335950	6.56273	0.0218829
Os07g0599900	6.55817	5.18951
Os01g0567200	6.55106	4.95023
Os06g0693100	6.54799	2.09515
Os02g0800750	6.54786	0.404339
Os07g0142300	6.53937	5.44359
Os04g0269100	6.52541	3.86357
Os03g0842501	6.521	2.17665
Os01g0608300	6.511	1.29423
Os11g0483000	6.50856	0.0751136
Os06g0320500	6.50346	0.346663
Os06g0347966	6.50133	7.01405
Os10g0185100	6.49571	0.0172502
Os01g0183600	6.49317	2.436
Os11g0688832	6.4894	1.36949
Os12g0282400	6.4864	2.42626
Os12g0180800	6.48582	1.1592
Os12g0509100	6.48255	4.74437
Os02g0271600	6.47466	2.87478
Os07g0611400	6.46455	1.30863
Os07g0146800	6.45741	1.40992
Os08g0515000	6.45118	3.34014
Os07g0521500	6.43986	0.345721
Os07g0558400	6.43605	0.914042
Os05g0425301	6.43502	0.0257007
Os09g0436500	6.43222	1.82326
Os03g0359600	6.42877	0.0397666
Os02g0772200	6.42844	0.143706
Os11g0540700	6.41342	1.43201
Os01g0165100	6.40952	3.89129
Os08g0410900	6.40922	3.97773
Os06g0621600	6.39762	2.52242
Os07g0510800	6.39658	2.10219
Os12g0524201	6.39581	0.121912
Os12g0108350	6.39486	0.0473532
Os02g0825166	6.38982	0.0493365
Os12g0265600	6.38538	2.84549
Os11g0242800	6.38088	2.02262
Os12g0265701	6.37941	1.34913
Os11g0183150	6.37197	2.46957
Os11g0666100	6.36698	2.01742
Os03g0199800	6.36275	0.649676
Os01g0703000	6.36002	0.0234115
Os01g0660450	6.35783	0.0321681
Os02g0226400	6.35289	0.332619
Os08g0435900	6.35123	1.29839
Os10g0339650	6.35058	0.809311
Os01g0943400	6.35014	1.4196
Os07g0664400	6.3482	2.20524
Os10g0451600	6.34666	2.46266
Os01g0600900	6.33974	2.36514
Os04g0401100	6.33929	0.0317781
Os09g0278700	6.33926	2.6327
Os02g0800433	6.3368	0.191907
Os09g0455300	6.33522	1.99056
Os07g0534600	6.33509	3.74691
Os02g0156500	6.32659	5.29677
Os10g0488300	6.32289	5.57456
Os06g0325350	6.31264	1.41264
Os09g0439500	6.31154	2.50617
Os09g0327575	6.30253	1.21964
Os08g0514600	6.29965	2.00265
Os11g0204800	6.297	0.0809886
Os07g0221300	6.29457	0.319484
Os06g0183600	6.29296	0.0560188
Os11g0606100	6.29181	0.021158
Os01g0549300	6.28999	2.73807
Os07g0241751	6.28439	4.03466
Os08g0347500	6.27855	4.07277
Os07g0146300	6.27591	0.0247302
Os11g0222900	6.27306	6.5528
Os01g0898600	6.26985	0.688078
Os07g0492200	6.26128	2.43347
Os07g0676800	6.25278	0.643182
Os08g0516550	6.24972	0.0200447
Os08g0355500	6.24707	0.887957
Os06g0303400	6.23395	2.99252
Os04g0368800	6.23347	2.46904
Os02g0200950	6.22879	3.24736
Os11g0531800	6.22572	7.98089
Os08g0165601	6.22353	4.69269
Os11g0643100	6.21932	4.68682
Os08g0189700	6.21877	1.9187
Os04g0369066	6.20749	3.02969
Os04g0112000	6.20453	3.25233
Os02g0801210	6.1984	0.0198386
Os02g0102800	6.19813	2.90221
Os03g0830600	6.19421	0.0620988
Os04g0366000	6.19079	1.4194
Os02g0310400	6.15979	0.0272613
Os12g0246700	6.15948	4.67085
Os07g0503200	6.15881	2.84133
Os03g0644850	6.15253	0.956942
Os02g0801255	6.15207	0.809608
Os11g0197433	6.14018	0.0787664
Os07g0255200	6.13766	0.369317
Os11g0430100	6.12847	2.65268
Os07g0535600	6.12552	0.925355
Os01g0654900	6.11681	0.32555
Os01g0393100	6.10875	2.68347
Os12g0207600	6.10399	0.606253
Os01g0691000	6.10245	1.90671
Os04g0225100	6.09921	2.15787
Os01g0870500	6.0976	1.16618
Os08g0507100	6.09433	3.94414
Os05g0221200	6.09105	2.86717
Os08g0234200	6.08128	0.294023
Os01g0786700	6.07997	0.0285117
Os10g0213700	6.07668	2.59416
Os01g0113450	6.07392	2.78927
Os03g0768450	6.07018	0.994318
Os08g0238200	6.06371	3.15075
Os03g0711100	6.06217	3.36286
Os08g0373400	6.06039	1.21232
Os03g0178600	6.05996	0.0350056
Os03g0165375	6.05428	0.935106
Os05g0552700	6.05152	2.74481
Os09g0554101	6.04609	2.92949
Os07g0582600	6.03968	0.0645402
Os11g0594800	6.03699	1.06145
Os03g0746000	6.03675	3.1525
Os04g0561800	6.0359	0.0298505
Os05g0448675	6.03224	2.71167
Os09g0490750	6.01781	1.50571
Os07g0107583	6.0154	2.31167
Os06g0627400	6.01118	0.0609267
Os12g0488600	6.01011	4.55769
Os05g0153300	6.00853	4.51385
Os10g0164500	5.99729	1.43723
Os06g0263801	5.97941	1.76234
Os10g0349300	5.97755	2.38966
Os05g0392900	5.97499	4.73023
Os01g0945700	5.97067	0.0588568
Os01g0383100	5.96819	3.76987
Os09g0425200	5.96565	3.39158
Os02g0482400	5.95625	0.0337284
Os03g0643611	5.94822	0.0201293
Os03g0243350	5.94774	2.98704
Os06g0314300	5.94728	2.38778
Os02g0286850	5.94272	2.14279
Os06g0486900	5.93777	3.0101
Os03g0675000	5.92119	2.47968
Os11g0682501	5.9198	0.0413406
Os06g0591400	5.91917	3.50711
Os02g0497600	5.91565	2.61354
Os10g0416800	5.91061	2.77228
Os12g0269100	5.91047	1.9827
Os09g0507200	5.90961	1.86031
Os10g0185200	5.90069	0.0335591
Os05g0438201	5.89875	2.46812
Os12g0204100	5.89553	4.69704
Os04g0299500	5.8946	4.60856
Os12g0182900	5.89174	0.0293944
Os10g0439800	5.89061	2.46409
Os05g0384600	5.89001	1.00885
Os07g0677600	5.88484	2.3541
Os10g0254720	5.88407	0.0533656
Os03g0271350	5.87761	4.4198
Os06g0242700	5.87583	3.26054
Os08g0235183	5.87025	0.642944
Os11g0682600	5.8655	0.99044
Os07g0132001	5.86003	4.56361
Os02g0825600	5.85873	1.11696
Os07g0600200	5.85194	1.59837
Os08g0543050	5.84491	1.27359
Os06g0337100	5.8442	0.034209
Os10g0504100	5.84338	0.785826
Os01g0944000	5.84219	2.76059
Os04g0370900	5.83956	2.25171
Os01g0266200	5.83788	0.583008
Os12g0292400	5.83693	4.99322
Os01g0813700	5.82901	0.944052
Os03g0722200	5.82397	7.23673
Os01g0609700	5.81477	1.70744
Os03g0580200	5.81243	0.0536158
Os04g0478000	5.80449	13.3585
Os07g0599700	5.79957	4.52531
Os08g0318400	5.79911	8.67027
Os05g0173800	5.79454	1.67617
Os01g0740300	5.79405	0.251172
Os04g0459500	5.78328	1.61966
Os02g0467500	5.78143	1.33337
Os04g0371500	5.78128	1.06194
Os04g0487000	5.77922	8.25847
Os11g0462800	5.77067	0.590565
Os01g0282251	5.76895	1.92511
Os08g0237800	5.75887	0.580507
Os12g0540100	5.75039	0.287723
Os12g0189400	5.74744	0.40435
Os10g0149000	5.74677	0.0767695
Os08g0335600	5.74516	0.136075
Os07g0175500	5.74352	4.75455
Os04g0388000	5.74098	0.320226
Os08g0181925	5.73818	0.70881
Os06g0697500	5.73618	4.17429
Os02g0211350	5.7303	0.0646597
Os10g0355800	5.724	2.20463
Os01g0144200	5.72007	1.11756
Os02g0119000	5.71972	1.18659
Os04g0542100	5.71526	2.50269
Os04g0371000	5.70694	0.0693069
Os07g0502550	5.7059	1.0326
Os02g0265100	5.70437	1.82227
Os04g0383700	5.70306	2.0092
Os04g0420700	5.70014	0.882596
Os10g0198900	5.683	0.0233884
Os11g0274166	5.68217	0.294422
Os11g0211300	5.6761	4.12319
Os04g0688500	5.66735	1.97355
Os04g0462400	5.66686	4.63299
Os07g0205900	5.65699	2.48203
Os12g0609100	5.65657	1.76176
Os12g0624700	5.63946	0.0399601
Os12g0210450	5.63824	1.95413
Os01g0164300	5.63385	1.94401
Os09g0402533	5.63108	0.0275462
Os09g0356100	5.62667	0.0667305
Os07g0628301	5.6257	2.27597
Os04g0337800	5.62134	0.0334223
Os11g0694100	5.61455	0.0472957
Os04g0510000	5.61216	1.6833
Os03g0565825	5.58868	0.0289585
Os06g0626200	5.58739	0.844691
Os02g0617075	5.58566	3.05842
Os12g0171801	5.57626	0.960088
Os11g0533800	5.57495	11.8735
Os10g0468600	5.56539	3.81534
Os06g0267400	5.5634	3.88025
Os11g0665950	5.56125	1.72631
Os06g0570600	5.55879	0.69049
Os02g0159100	5.55605	0.26002
Os11g0524601	5.55142	0.0333209
Os11g0155350	5.54006	0.324527
Os01g0702900	5.53588	0.95966
Os01g0610050	5.53506	1.92881
Os12g0412800	5.53491	3.00951
Os08g0102000	5.52832	1.49081
Os06g0324300	5.52795	0.241922
Os01g0537250	5.52455	0.0598893
Os04g0552200	5.52179	3.0946
Os09g0268700	5.51932	2.47368
Os05g0189425	5.51897	0.610678
Os08g0363800	5.51783	1.16113
Os12g0509600	5.51589	2.76219
Os11g0481301	5.51576	1.30921
Os08g0501700	5.51308	0.582976
Os11g0689800	5.51156	2.38036
Os01g0686100	5.50604	5.57672
Os01g0947800	5.50397	1.35864
Os12g0621050	5.50292	1.98499
Os07g0148900	5.49362	1.74431
Os07g0617500	5.49063	3.28628
Os05g0555450	5.48179	0.0380278
Os08g0349300	5.47662	3.5653
Os03g0862200	5.47171	0.669709
Os06g0254300	5.46178	0.889582
Os10g0107200	5.46153	0.062643
Os11g0116600	5.4505	0.987908
Os11g0262600	5.4493	2.06932
Os04g0606601	5.44727	1.61842
Os01g0866000	5.44144	2.37699
Os01g0688000	5.43691	0.80612
Os01g0303000	5.43374	3.66046
Os01g0114600	5.43188	8.10569
Os12g0629700	5.43038	1.11224
Os03g0259600	5.42074	2.20853
Os11g0622150	5.41704	2.05222
Os09g0555800	5.41657	6.95146
Os09g0346500	5.41321	1.09259
Os08g0236800	5.40609	2.27941
Os08g0486300	5.40221	2.03613
Os12g0478400	5.40021	2.7105
Os06g0587000	5.39261	1.82106
Os11g0251400	5.39177	3.28894
Os07g0562700	5.3873	1.56512
Os01g0269550	5.38148	2.71597
Os03g0164100	5.38117	0.12395
Os03g0675600	5.36896	1.47798
Os03g0717950	5.36887	0.784966
Os06g0264800	5.36879	0.38213
Os12g0605900	5.36636	0.0664441
Os07g0127500	5.35243	3.55619
Os01g0903100	5.35206	1.7902
Os12g0173400	5.35002	3.05576
Os01g0216900	5.34832	1.61821
Os06g0620000	5.34727	0.852062
Os02g0694900	5.3469	0.153041
Os03g0185400	5.3457	0.638327
Os12g0423484	5.33236	2.50052
Os07g0663200	5.32088	2.03803
Os12g0181300	5.31625	1.22241
Os01g0784500	5.31339	0.118207
Os06g0324150	5.30709	0.276534
Os06g0165900	5.30639	2.81646
Os08g0158300	5.30413	1.27776
Os05g0235701	5.29823	2.87666
Os04g0369000	5.2964	3.19826
Os07g0109800	5.29391	0.0555786
Os11g0621200	5.28661	0.0813255
Os03g0343900	5.27195	1.55334
Os10g0105750	5.27119	3.39183
Os03g0284700	5.26482	3.79292
Os07g0461800	5.26201	0.0676583
Os07g0273700	5.26161	1.69345
Os05g0449100	5.26147	0.432466
Os04g0389500	5.25572	0.633621
Os09g0564600	5.23717	1.2151
Os03g0416200	5.23325	5.71762
Os06g0113500	5.22688	1.6028
Os06g0606401	5.22344	0.0236581
Os02g0197600	5.21902	2.61377
Os04g0369600	5.21684	4.1888
Os04g0359900	5.21476	0.911049
Os11g0146000	5.21412	5.06373
Os12g0423313	5.21261	1.55464
Os12g0558400	5.21239	7.29801
Os05g0427800	5.20923	3.35994
Os06g0135000	5.20264	5.9524
Os05g0190500	5.20157	5.11161
Os12g0559200	5.2015	0.067006
Os11g0684400	5.19549	1.28291
Os04g0454200	5.19329	0.033393
Os04g0526300	5.18898	3.12487
Os06g0492101	5.18876	2.55071
Os07g0462132	5.18712	0.0355048
Os11g0670900	5.18619	1.46629
Os05g0117300	5.18406	4.35623
Os02g0282900	5.17577	1.62562
Os04g0591900	5.17572	3.47307
Os01g0382900	5.16917	0.0751622
Os10g0332733	5.1671	0.0326862
Os10g0198100	5.16279	2.59204
Os12g0178800	5.15972	2.48833
Os11g0664800	5.15675	1.93087
Os08g0270000	5.1485	3.04684
Os08g0125450	5.14055	1.35896
Os11g0539901	5.1392	3.71069
Os01g0158533	5.13662	1.58037
Os02g0126200	5.13647	1.68127
Os12g0184300	5.13005	3.28946
Os08g0265000	5.12353	1.61552
Os08g0180950	5.12248	1.97581
Os01g0959750	5.12194	2.57202
Os12g0170800	5.11584	0.00331093
Os11g0700100	5.11083	2.23147
Os11g0159500	5.10927	1.41856
Os02g0282301	5.10666	2.63021
Os01g0675400	5.10575	2.74714
Os12g0505800	5.10152	2.51208
Os07g0621201	5.09811	2.74466
Os03g0353333	5.09806	0.109968
Os11g0665600	5.09493	4.70282
Os05g0220500	5.09221	2.85005
Os11g0634350	5.09024	1.66596
Os01g0124700	5.07737	5.46611
Os01g0944500	5.07676	0.0386215
Os08g0226000	5.07304	1.08484
Os11g0630300	5.06895	1.93022
Os10g0529600	5.06431	1.56786
Os11g0441550	5.05866	2.51176
Os12g0621600	5.05776	2.35609
Os10g0550775	5.05282	2.15701
Os03g0129300	5.05225	0.999761
Os08g0561800	5.03942	2.31517
Os11g0171300	5.03356	0.979229
Os01g0115750	5.03054	0.808836
Os05g0190300	5.02827	5.02021
Os01g0960900	5.02806	1.55158
Os09g0287000	5.02777	0.920207
Os08g0227900	5.01699	0.0321647
Os01g0508500	5.01683	1.71654
Os01g0978500	5.01249	7.95453
Os07g0652900	4.99428	0.293893
Os06g0305400	4.99262	0.964074
Os06g0489900	4.99138	3.45174
Os04g0307466	4.99128	2.88319
Os08g0320200	4.9838	2.65692
Os03g0688000	4.98347	2.00951
Os02g0216250	4.9829	0.0243001
Os06g0319540	4.97298	2.00551
Os03g0839600	4.97119	0.590425
Os09g0247500	4.97071	6.34445
Os05g0206100	4.96322	3.00565
Os09g0307300	4.96283	3.81102
Os02g0287900	4.95841	0.0578839
Os11g0162700	4.95246	0.199813
Os09g0322900	4.94846	0.806956
Os06g0570566	4.94712	0.865022
Os05g0157600	4.94644	0.523611
Os06g0232650	4.94018	1.93804
Os03g0108300	4.93816	3.76809
Os03g0368950	4.93282	0.0795351
Os02g0303000	4.9306	0.0363749
Os01g0963000	4.92811	2.91388
Os09g0279400	4.91973	3.29151
Os08g0239300	4.91449	2.83279
Os06g0641500	4.91335	1.82588
Os10g0523201	4.91307	1.20483
Os09g0238700	4.90818	1.04699
Os10g0371100	4.90771	1.22699
Os11g0655300	4.90593	2.34381
Os12g0420400	4.90531	2.54506
Os03g0574900	4.90255	0.629254
Os10g0567900	4.89637	1.54929
Os02g0698000	4.8952	1.02147
Os12g0576100	4.89367	0.389545
Os03g0234100	4.89364	2.46539
Os01g0910800	4.88967	2.38996
Os05g0232200	4.88877	2.14378
Os12g0468000	4.88703	2.5747
Os08g0459700	4.8855	0.108664
Os01g0950000	4.88059	3.48199
Os12g0189700	4.87957	2.11128
Os01g0509700	4.8752	1.94824
Os11g0540100	4.87015	4.44029
Os05g0439000	4.86718	1.9557
Os04g0614500	4.86296	2.11483
Os02g0808300	4.85974	2.52236
Os07g0459500	4.85959	2.34038
Os12g0116200	4.85093	1.48837
Os04g0496950	4.84312	5.03617
Os05g0329300	4.84197	0.286044
Os11g0470966	4.83186	1.05642
Os02g0498100	4.82562	3.42039
Os05g0198100	4.82512	2.18855
Os11g0202500	4.82504	0.119341
Os09g0440851	4.81586	0.0414657
Os04g0371100	4.81517	1.93366
Os10g0162844	4.81173	0.131182
Os02g0577700	4.80766	2.37384
Os06g0689700	4.8025	1.68536
Os11g0555300	4.79781	0.588668
Os01g0902800	4.79133	0.176029
Os04g0167300	4.78513	0.852895
Os09g0499400	4.78001	2.32504
Os06g0335900	4.77811	1.8854
Os02g0639100	4.77517	3.48565
Os09g0561450	4.7707	1.23132
Os12g0420200	4.76349	1.08345
Os07g0653900	4.75954	0.472297
Os06g0483200	4.75808	1.98907
Os11g0227800	4.75787	3.04276
Os10g0478750	4.75566	2.51453
Os10g0122400	4.7467	2.9007
Os12g0265201	4.74244	0.0868401
Os07g0409200	4.74213	0.0406837
Os04g0259200	4.74058	1.43331
Os10g0135650	4.73449	0.0865274
Os03g0673700	4.7342	0.863764
Os12g0226900	4.73344	0.267862
Os01g0383001	4.73174	0.0484185
Os10g0122500	4.7275	2.89291
Os07g0492966	4.72654	1.62607
Os04g0300100	4.72501	0.112526
Os12g0450500	4.72093	3.60685
Os05g0372900	4.71536	1.37481
Os01g0563000	4.70638	1.91236
Os12g0552200	4.7047	0.0928025
Os11g0146100	4.70112	1.30176
Os10g0318700	4.7005	0.428062
Os01g0320400	4.69622	0.213629
Os07g0486700	4.68822	0.246161
Os07g0142500	4.6847	4.88181
Os06g0335975	4.681	1.29713
Os11g0189600	4.67433	1.43679
Os11g0543900	4.67331	1.21637
Os07g0649500	4.66859	2.07552
Os02g0166200	4.66817	3.41181
Os09g0506450	4.66502	2.98804
Os03g0807900	4.66014	1.09759
Os03g0803066	4.64989	6.31588
Os06g0174700	4.64649	0.0950812
Os05g0588100	4.64637	0.595041
Os12g0207500	4.64135	1.45999
Os10g0532800	4.63889	1.4304
Os08g0202350	4.63511	3.32886
Os12g0150500	4.63416	0.433489
Os07g0273600	4.63402	1.11847
Os11g0245400	4.6305	2.12869
Os03g0643522	4.61325	2.17159
Os04g0343050	4.60868	0.796357
Os04g0578300	4.60628	3.58792
Os05g0329100	4.6043	0.287867
Os04g0377500	4.60414	0.137532
Os11g0252400	4.60065	1.15369
Os02g0773732	4.59105	2.34888
Os01g0899387	4.58454	1.15857
Os03g0844900	4.57897	0.914194
Os02g0635400	4.57427	2.84638
Os03g0722000	4.56702	0.841791
Os08g0399900	4.5658	2.95664
Os03g0234900	4.56486	0.74873
Os08g0496700	4.55748	0.0364326
Os04g0191600	4.55492	4.17358
Os09g0550400	4.55332	0.0923725
Os02g0493200	4.55063	0.0970091
Os12g0410000	4.5479	2.06332
Os03g0847500	4.54753	0.592081
Os01g0567600	4.54668	0.108556
Os05g0215066	4.54419	4.79071
Os05g0489500	4.53932	1.36374
Os10g0536050	4.53732	0.00379785
Os10g0527601	4.53411	3.83446
Os11g0636050	4.53224	2.44465
Os04g0429087	4.53185	0.508711
Os05g0355900	4.531	0.215352
Os05g0561400	4.53098	3.36691
Os06g0313320	4.53003	3.1322
Os06g0271300	4.52407	2.73887
Os09g0469300	4.52142	2.89897
Os03g0339400	4.51696	1.16394
Os07g0622400	4.51529	2.89456
Os06g0234600	4.51269	3.24949
Os10g0118200	4.51136	3.09077
Os01g0143400	4.50753	1.04731
Os05g0160300	4.50517	1.93944
Os12g0265400	4.50445	1.75775
Os05g0270500	4.4998	0.708481
Os07g0673550	4.49944	1.34451
Os06g0235800	4.49933	7.20953
Os01g0586800	4.49081	3.28147
Os03g0639300	4.48752	1.05632
Os01g0114550	4.48252	1.57109
Os05g0328333	4.48035	0.489217
Os08g0438801	4.47862	0.140565
Os12g0610100	4.47743	1.74559
Os09g0344400	4.47691	0.182528
Os03g0664400	4.47433	3.21926
Os08g0204632	4.47117	0.749494
Os02g0212975	4.46857	1.80651
Os07g0497500	4.46837	0.0880423
Os07g0122100	4.46564	0.993574
Os09g0566300	4.45446	5.66616
Os06g0316800	4.45324	0.50592
Os08g0189600	4.44967	1.44854
Os02g0793400	4.44758	0.678436
Os03g0415700	4.43765	0.153923
Os05g0158200	4.43601	3.19754
Os11g0205300	4.43558	2.78538
Os11g0228201	4.43337	0.0232365
Os12g0424180	4.42809	0.678354
Os12g0524750	4.42567	0.977501
Os07g0122000	4.42278	1.36607
Os11g0697100	4.41805	0.447239
Os07g0228400	4.41258	0.173014
Os07g0663700	4.41107	1.42466
Os10g0103500	4.40117	0.165655
Os12g0225900	4.39881	0.74097
Os03g0624600	4.3979	0.51145
Os01g0719350	4.39574	1.99339
Os12g0135500	4.3953	1.03571
Os01g0154950	4.39491	2.34303
Os01g0676800	4.39189	1.935
Os12g0179951	4.38749	2.7851
Os05g0166600	4.38575	2.13369
Os04g0554800	4.38396	0.5005
Os10g0205400	4.38203	4.12592
Os01g0163000	4.37689	0.421911
Os06g0620200	4.37028	3.11515
Os03g0743650	4.362	0.197631
Os05g0378200	4.35456	1.77981
Os12g0471100	4.35291	3.4255
Os10g0198333	4.35246	0.498642
Os07g0631500	4.35207	0.507977
Os09g0446700	4.34194	0.213954
Os03g0264075	4.33564	0.0323082
Os06g0263450	4.33537	0.641623
Os05g0406550	4.33404	0.225622
Os05g0332000	4.33338	0.298943
Os01g0237000	4.32904	0.0912465
Os07g0660100	4.32115	1.97334
Os10g0213966	4.31742	2.40265
Os12g0424300	4.31411	1.07179
Os11g0199000	4.31371	0.931025
Os09g0518750	4.30368	3.33095
Os01g0740800	4.29931	5.43977
Os12g0292301	4.29842	3.68459
Os10g0209700	4.29644	0.390165
Os10g0392900	4.29635	0.327809
Os04g0204000	4.29479	1.6152
Os06g0243801	4.29137	0.321144
Os11g0707000	4.28804	0.932905
Os05g0210700	4.28768	2.39402
Os02g0120700	4.27711	2.71491
Os07g0681350	4.2756	3.39178
Os06g0585982	4.27537	0.741729
Os01g0731100	4.27417	5.92647
Os12g0610800	4.27283	2.53848
Os08g0165800	4.26925	2.57889
Os08g0387050	4.26812	7.37738
Os01g0372350	4.26774	0.604051
Os08g0114100	4.266	1.83733
Os02g0276200	4.25874	2.01826
Os12g0212400	4.25785	1.83209
Os01g0593700	4.2539	1.05784
Os04g0468000	4.25006	1.67494
Os12g0409800	4.24972	0.063958
Os08g0510101	4.22946	0.157834
Os11g0579600	4.22764	0.270418
Os05g0329001	4.22381	0.0280963
Os04g0429050	4.22083	1.9714
Os10g0381601	4.21766	1.62042
Os09g0356200	4.21626	1.13713
Os07g0542232	4.21444	0.121335
Os04g0115700	4.21338	1.19953
Os11g0471300	4.21243	2.84114
Os12g0493900	4.20772	1.39459
Os11g0211200	4.20162	0.472206
Os10g0159167	4.20019	2.30526
Os08g0178900	4.19928	1.53235
Os11g0244100	4.19688	2.38605
Os10g0329900	4.19341	0.00662313
Os01g0501800	4.18342	1.21526
Os02g0288400	4.17766	1.40413
Os04g0370100	4.17256	4.07817
Os03g0306800	4.17151	0.921716
Os03g0648250	4.16402	1.13985
Os08g0519300	4.16396	1.70397
Os04g0445025	4.16001	1.11517
Os05g0574000	4.15134	0.883851
Os03g0259001	4.15096	5.26635
Os12g0123600	4.14733	0.0393624
Os02g0725700	4.1449	3.25341
Os11g0656601	4.14257	1.28986
Os11g0229700	4.1423	5.70497
Os01g0110200	4.14227	1.48753
Os12g0289833	4.14138	0.275743
Os08g0209000	4.13591	0.733222
Os06g0671000	4.13477	0.531265
Os02g0576400	4.13181	0.63208
Os12g0281300	4.13062	0.747281
Os02g0731700	4.11442	0.586973
Os11g0206850	4.11304	0.544381
Os08g0389601	4.11113	4.84464
Os11g0220500	4.10987	0.112445
Os05g0328901	4.10726	0.30492
Os09g0103300	4.10559	0.050452
Os01g0162200	4.09889	0.748208
Os02g0194700	4.09889	0.240741
Os12g0137700	4.09563	3.02875
Os09g0534600	4.08963	0.342433
Os03g0814500	4.0881	2.3603
Os08g0546800	4.08288	0.720931
Os08g0376500	4.08227	1.09172
Os09g0358000	4.07728	1.23179
Os08g0189300	4.07005	1.78542
Os06g0274800	4.06694	4.77992
Os04g0423400	4.0663	1.0305
Os12g0258700	4.05714	2.10179
Os04g0473150	4.05673	1.99117
Os01g0517900	4.0559	0.586219
Os11g0256900	4.05015	0.288765
Os01g0976200	4.04962	1.81878
Os04g0630900	4.04901	0.163683
Os11g0535525	4.04438	1.49692
Os07g0681300	4.04437	1.3022
Os08g0101700	4.04395	1.71087
Os10g0514500	4.0423	2.01806
Os02g0166600	4.03842	4.04889
Os05g0329350	4.03836	0.504788
Os09g0424200	4.03678	1.68913
Os11g0219400	4.03619	2.17624
Os11g0660400	4.03618	0.904361
Os11g0569300	4.03369	0.0499486
Os10g0204300	4.03266	2.58201
Os08g0170700	4.02999	1.19038
Os02g0732800	4.02922	2.59046
Os04g0155200	4.02849	0.585184
Os06g0178800	4.02677	2.47981
Os05g0309000	4.01408	0.912192
Os08g0282700	4.01087	3.0569
Os05g0159501	4.00869	0.0141147
Os06g0123000	4.00724	1.81318
Os06g0718000	4.00701	3.24446
Os03g0176100	4.00143	4.60501
Os01g0940800	3.99628	1.10667
Os11g0246300	3.99394	2.01715
Os08g0478000	3.98062	2.20511
Os12g0103540	3.97136	4.18341
Os04g0164300	3.97122	8.07634
Os12g0575000	3.96964	0.730134
Os05g0560000	3.96815	1.14589
Os06g0119900	3.96707	0.175517
Os08g0104600	3.96471	1.58105
Os06g0317400	3.96082	2.71536
Os12g0422971	3.95288	1.33781
Os03g0307300	3.95033	2.09192
Os10g0344500	3.94763	2.92787
Os09g0271100	3.94622	0.202615
Os08g0170800	3.94037	0.880799
Os07g0407350	3.93771	0.00484182
Os07g0148200	3.93236	1.4767
Os09g0306566	3.93089	3.43658
Os02g0282600	3.92436	1.89801
Os03g0759125	3.92216	2.59718
Os11g0246133	3.9212	1.8219
Os06g0235900	3.91944	0.688568
Os12g0207000	3.91791	0.158539
Os02g0709000	3.91647	2.03538
Os07g0575366	3.91643	0.380622
Os11g0649700	3.91374	0.113187
Os01g0784450	3.91371	0.358243
Os05g0175450	3.91166	0.428904
Os05g0131500	3.91013	0.691343
Os02g0731600	3.90809	3.63725
Os11g0125700	3.90802	1.38572
Os09g0517000	3.90746	0.646146
Os07g0650300	3.90494	0.441633
Os01g0714800	3.90153	0.713425
Os01g0215000	3.9003	7.64999
Os04g0290750	3.89989	1.52155
Os11g0594500	3.89905	3.20976
Os06g0535200	3.89779	1.15811
Os11g0701000	3.89634	1.36528
Os09g0314500	3.89477	3.36671
Os11g0686900	3.89391	1.34118
Os03g0644700	3.89274	0.203505
Os07g0562400	3.8892	0.483631
Os10g0213100	3.8884	8.76243
Os06g0621500	3.88633	2.2946
Os06g0585900	3.88147	1.02234
Os07g0212200	3.88086	0.336484
Os11g0620500	3.88082	0.0101198
Os08g0539700	3.8802	1.64611
Os07g0602800	3.87625	0.0126268
Os02g0781300	3.87087	0.0101004
Os03g0307200	3.8666	0.512092
Os01g0894700	3.86183	1.21456
Os11g0604900	3.85727	0.0214782
Os07g0141400	3.85085	0.933863
Os04g0651000	3.84832	1.18666
Os01g0824900	3.84417	1.23255
Os05g0206000	3.84277	2.20241
Os01g0144100	3.84189	0.850964
Os12g0639400	3.84141	2.47586
Os01g0585400	3.83995	0.418061
Os10g0181600	3.83203	1.26732
Os03g0355500	3.83099	0.788025
Os04g0415800	3.8238	0.168855
Os12g0144200	3.82072	0.751762
Os05g0487100	3.82066	0.201133
Os10g0422050	3.82	1.76778
Os01g0653500	3.8067	1.76868
Os12g0509400	3.80353	4.56532
Os11g0519500	3.79978	2.02681
Os01g0283400	3.79976	1.00823
Os05g0245300	3.79959	1.09609
Os02g0492000	3.79667	10.0385
Os03g0284650	3.79448	1.5243
Os04g0200400	3.79206	1.08259
Os03g0824350	3.78635	1.12776
Os01g0289732	3.778	4.53426
Os10g0409400	3.77615	1.56383
Os08g0294300	3.77555	0.18616
Os03g0592100	3.77548	0.224616
Os05g0342100	3.77326	3.38425
Os02g0614800	3.76853	1.01686
Os08g0119800	3.76776	0.421896
Os11g0126500	3.76649	0.126663
Os06g0241400	3.76398	0.0310801
Os09g0511900	3.76395	2.66813
Os09g0493000	3.75681	1.59257
Os02g0583700	3.75243	1.35989
Os03g0368900	3.75124	1.14536
Os04g0457300	3.74252	1.46315
Os04g0555700	3.73998	1.17649
Os03g0643800	3.73873	3.02924
Os05g0429100	3.73855	0.982338
Os07g0632000	3.73808	0.282698
Os07g0124300	3.73802	1.61001
Os12g0637400	3.72734	0.178634
Os06g0594650	3.72694	0.306637
Os12g0637200	3.72082	0.284692
Os07g0216600	3.72001	1.37656
Os08g0489300	3.71815	0.642337
Os09g0379600	3.70542	0.476194
Os01g0731150	3.70281	3.08262
Os10g0142600	3.70068	0.189514
Os11g0556400	3.69951	0.113459
Os02g0720600	3.69761	0.400102
Os10g0439100	3.69684	2.17075
Os12g0175400	3.69282	1.8317
Os03g0598600	3.68707	0.0133493
Os11g0643400	3.68627	1.26461
Os02g0118950	3.68546	4.15621
Os12g0575300	3.68468	1.2289
Os03g0197100	3.68392	1.04923
Os06g0317600	3.68215	0.00831734
Os01g0254850	3.6805	1.72573
Os04g0444400	3.67382	2.00603
Os06g0671300	3.6714	0.104447
Os01g0869800	3.66637	0.988634
Os11g0480000	3.66361	7.281
Os06g0274550	3.66009	0.553036
Os07g0577600	3.65964	1.25884
Os01g0696800	3.65877	0.859766
Os04g0476650	3.65598	1.9452
Os01g0690800	3.65244	1.4316
Os08g0151300	3.64832	2.26723
Os03g0793800	3.64667	2.51064
Os01g0356800	3.64615	1.04244
Os03g0339300	3.63984	0.992581
Os03g0759375	3.6394	1.45394
Os07g0521100	3.63852	1.02389
Os06g0295900	3.63711	1.62055
Os01g0159250	3.63602	0.428411
Os05g0568300	3.63481	1.09069
Os12g0467700	3.63063	0.638525
Os06g0591200	3.62749	1.6501
Os01g0854800	3.62688	1.61644
Os01g0827300	3.62686	1.46583
Os10g0191900	3.62594	1.5223
Os06g0257600	3.62324	2.95396
Os06g0705901	3.62271	0.761151
Os12g0411700	3.62028	1.75332
Os08g0340700	3.61791	0.0331584
Os02g0494000	3.61753	0.808938
Os05g0472400	3.61743	1.92403
Os04g0584201	3.61174	4.2679
Os03g0165350	3.60532	0.256905
Os05g0417700	3.60513	0.648113
Os09g0482500	3.59453	1.25752
Os05g0267732	3.59203	4.23207
Os04g0613950	3.59	1.45512
Os01g0360150	3.58822	0.254053
Os03g0154300	3.58717	0.602662
Os10g0468950	3.58671	1.29404
Os11g0549620	3.58664	2.15109
Os09g0482860	3.58492	1.35987
Os11g0700900	3.58201	1.45991
Os09g0482200	3.57874	1.31935
Os11g0134100	3.57861	1.11956
Os05g0568800	3.57722	4.23071
Os03g0293600	3.5771	0.086439
Os02g0477300	3.57249	14.7889
Os10g0150600	3.57193	0.60203
Os03g0305950	3.57012	1.20528
Os07g0550600	3.56921	1.06862
Os02g0110500	3.56775	2.03919
Os05g0163300	3.56675	4.01803
Os05g0328466	3.56608	1.43082
Os08g0158600	3.56377	0.250829
Os03g0124000	3.56131	0.00835442
Os03g0266900	3.56107	0.134358
Os02g0729400	3.55944	0.881814
Os05g0458500	3.55335	0.971279
Os10g0103700	3.54939	1.07227
Os12g0131900	3.54528	0.831805
Os12g0111500	3.54442	1.40299
Os08g0208300	3.53821	1.21037
Os04g0273900	3.5374	0.44058
Os07g0620600	3.53732	1.49832
Os10g0172000	3.53369	2.56426
Os10g0163370	3.53209	0.399785
Os01g0208000	3.53044	0.00835505
Os01g0298400	3.53001	1.24541
Os05g0341450	3.52999	1.90746
Os08g0564000	3.52986	1.89996
Os01g0301500	3.52945	0.518334
Os03g0360300	3.52917	0.545829
Os11g0129000	3.52845	1.24146
Os07g0170900	3.52234	0.230067
Os08g0105800	3.52042	0.124162
Os07g0435300	3.51921	0.923898
Os08g0106801	3.51917	1.27534
Os10g0199500	3.51884	1.07372
Os11g0550800	3.51653	1.33946
Os02g0582900	3.51651	1.53475
Os10g0496900	3.51474	1.16162
Os08g0102800	3.5113	0.0400005
Os01g0115725	3.50895	2.58432
Os04g0477900	3.50864	10.674
Os05g0594001	3.50827	1.72098
Os05g0135400	3.50785	0.722503
Os02g0618400	3.50163	4.41745
Os07g0634400	3.49553	2.05787
Os11g0340477	3.49411	1.14503
Os03g0815332	3.49303	3.87042
Os01g0698200	3.49222	4.27495
Os01g0838300	3.49164	0.795794
Os02g0148700	3.49134	1.81038
Os04g0326300	3.48911	0.106034
Os07g0142802	3.48351	0.0508526
Os02g0517333	3.47717	4.12912
Os03g0124100	3.47451	1.12017
Os01g0348000	3.47024	1.81315
Os11g0435800	3.46908	2.27608
Os07g0102100	3.46233	1.39837
Os11g0304050	3.46171	0.528422
Os10g0343951	3.45984	0.272346
Os05g0427900	3.4557	1.03208
Os08g0265300	3.45283	1.34254
Os01g0117000	3.45177	0.495265
Os03g0710500	3.44977	0.62091
Os04g0659200	3.44947	1.45436
Os01g0602400	3.44915	1.29077
Os04g0371600	3.44841	1.04382
Os02g0766900	3.43585	1.41038
Os12g0550800	3.43435	2.09843
Os01g0837600	3.4326	1.37669
Os01g0120300	3.43193	0.455561
Os07g0486400	3.43076	1.6896
Os01g0182100	3.42671	1.01585
Os02g0599200	3.42595	0.481972
Os03g0808000	3.4253	0.175026
Os08g0125112	3.41877	0.649752
Os05g0460000	3.41765	0.267275
Os06g0264200	3.41692	0.810312
Os08g0113000	3.4157	0.517797
Os11g0299300	3.41256	5.14018
Os01g0730500	3.41155	0.157213
Os06g0268500	3.40906	1.74815
Os01g0942300	3.40833	1.21577
Os07g0222000	3.39905	0.941594
Os02g0768300	3.39783	1.02528
Os04g0422900	3.3973	0.629114
Os12g0629600	3.3972	4.20738
Os03g0687100	3.39551	0.236382
Os07g0511201	3.3939	0.16481
Os07g0693100	3.39388	0.766043
Os01g0668500	3.39252	0.58069
Os04g0490800	3.38606	0.774735
Os08g0482025	3.38455	2.74009
Os10g0131701	3.38209	0.693864
Os07g0600000	3.38149	0.0157549
Os05g0135450	3.38013	0.714975
Os07g0649200	3.38007	0.736281
Os02g0504000	3.37835	0.677733
Os04g0234600	3.37789	1.17423
Os02g0806000	3.37467	0.653474
Os10g0392800	3.37442	0.45518
Os11g0598000	3.37379	0.434049
Os10g0532300	3.37204	0.710131
Os06g0131700	3.37072	0.671789
Os05g0135500	3.36919	4.09398
Os04g0657900	3.3671	1.25353
Os06g0299100	3.36668	0.195091
Os03g0635000	3.36176	0.894979
Os08g0174000	3.36167	0.888551
Os07g0105800	3.3614	0.755326
Os01g0135900	3.36116	0.770669
Os10g0525400	3.35687	1.77558
Os06g0715200	3.35398	0.470747
Os12g0134900	3.34769	0.482396
Os11g0677101	3.34528	1.29903
Os01g0795600	3.34519	1.05569
Os01g0311600	3.34355	0.192269
Os06g0507200	3.34125	1.31735
Os02g0240100	3.33987	2.09601
Os10g0515900	3.33711	1.56798
Os06g0299300	3.3302	0.272291
Os09g0535200	3.32305	0.870994
Os10g0182300	3.31812	1.63556
Os07g0673600	3.31781	1.00588
Os06g0645100	3.31537	0.668154
Os01g0249900	3.31283	0.493352
Os07g0507850	3.3122	1.23942
Os02g0810900	3.30892	0.987755
Os01g0734000	3.30758	3.76062
Os06g0109300	3.30537	0.398797
Os02g0815300	3.30254	1.15367
Os04g0572500	3.29965	0.349005
Os08g0488700	3.29949	2.31695
Os10g0108800	3.29859	1.33219
Os11g0489250	3.29692	1.23457
Os12g0562166	3.29683	0.281555
Os06g0261300	3.29608	0.537485
Os10g0113900	3.29418	0.973703
Os08g0203100	3.29338	1.28968
Os08g0198100	3.28985	0.0131594
Os04g0580800	3.28885	0.989724
Os03g0267300	3.28829	0.914596
Os01g0248300	3.28773	1.34268
Os08g0121400	3.28477	0.668432
Os02g0758000	3.28196	0.480156
Os05g0539800	3.27984	3.52058
Os06g0641932	3.2796	0.934162
Os03g0595300	3.27352	0.283791
Os09g0499450	3.26966	1.61915
Os10g0527400	3.26961	1.9367
Os06g0271600	3.26955	1.34183
Os12g0617400	3.26158	1.04659
Os12g0584700	3.25795	1.85946
Os06g0522300	3.25628	0.522516
Os11g0258400	3.25461	0.915149
Os05g0202800	3.25265	2.09861
Os01g0186000	3.25171	0.15001
Os08g0248100	3.25154	0.426413
Os02g0191600	3.2505	1.94337
Os08g0126000	3.25009	1.49145
Os03g0787350	3.24883	0.930355
Os02g0111600	3.24644	0.119539
Os01g0545100	3.24528	0.806341
Os02g0112100	3.24495	0.292759
Os11g0654800	3.2445	0.915556
Os10g0490900	3.24349	1.27959
Os01g0361500	3.23998	0.999135
Os03g0830200	3.23875	1.22831
Os01g0297950	3.23349	0.200758
Os04g0379400	3.23197	0.730424
Os03g0388800	3.2318	0.356474
Os01g0959900	3.23133	0.895158
Os06g0586150	3.22754	0.487131
Os06g0133100	3.22394	0.214669
Os05g0189300	3.22221	0.388759
Os05g0331532	3.22168	1.69172
Os04g0168400	3.21885	0.892422
Os09g0341500	3.21829	1.33828
Os05g0495900	3.21817	0.792737
Os08g0547300	3.21798	0.639247
Os01g0606000	3.21743	0.861463
Os03g0787400	3.21581	0.942007
Os02g0728850	3.21354	1.07593
Os11g0258500	3.21215	0.838522
Os12g0217400	3.21186	0.539417
Os04g0405300	3.21025	1.51813
Os01g0117025	3.20936	0.80405
Os09g0327000	3.20694	0.369652
Os09g0400400	3.20652	1.27306
Os04g0603300	3.20117	1.17189
Os07g0215500	3.20113	1.18063
Os05g0448300	3.19809	0.808951
Os11g0649400	3.19488	1.32636
Os01g0608101	3.19385	0.599765
Os08g0550600	3.19277	2.39662
Os07g0129300	3.19154	0.553411
Os03g0105401	3.18933	11.3786
Os01g0155000	3.18453	1.29063
Os03g0340100	3.18271	0.751343
Os03g0564600	3.17657	1.11191
Os02g0609000	3.17547	0.703847
Os03g0328300	3.17017	1.32048
Os10g0469600	3.16978	0.819292
Os05g0420300	3.16646	0.665425
Os04g0384200	3.16627	0.702851
Os07g0153150	3.16248	3.87326
Os09g0545700	3.16163	4.70993
Os09g0513200	3.16017	0.978829
Os07g0526600	3.15889	1.89837
Os01g0566000	3.15861	1.06763
Os11g0666200	3.15706	0.880365
Os11g0692500	3.15532	0.702986
Os02g0581100	3.15322	0.904739
Os02g0264501	3.14421	1.61399
Os10g0531400	3.14374	0.306085
Os11g0227200	3.14336	3.93522
Os12g0171900	3.13861	0.406579
Os04g0445000	3.13855	0.338967
Os01g0635550	3.13821	1.5182
Os05g0380850	3.1368	0.449483
Os03g0342850	3.13562	0.480382
Os04g0541700	3.13358	0.130788
Os05g0401100	3.13158	1.11397
Os01g0111600	3.1306	2.49109
Os02g0594232	3.12617	1.69831
Os06g0663800	3.12564	0.698135
Os10g0497750	3.12435	0.560308
Os05g0541000	3.12292	0.262548
Os10g0447900	3.1229	1.92521
Os11g0577866	3.11776	0.120348
Os03g0439500	3.11395	0.627115
Os06g0718400	3.11375	0.292113
Os11g0147700	3.11336	2.31074
Os05g0120200	3.10677	1.03688
Os02g0305950	3.10637	0.756978
Os03g0217000	3.10448	2.00743
Os01g0931700	3.10269	0.40944
Os05g0244900	3.10212	0.45495
Os11g0618850	3.10081	0.560646
Os07g0671000	3.10045	1.11371
Os02g0834700	3.09862	3.33233
Os05g0128900	3.09558	1.76844
Os11g0645400	3.09115	0.447978
Os08g0242800	3.09074	0.940142
Os10g0464300	3.08812	1.15441
Os01g0587400	3.08796	0.572643
Os01g0605700	3.08749	0.770046
Os12g0570400	3.08229	0.980576
Os03g0830950	3.08102	1.19472
Os03g0421700	3.07937	0.0283784
Os12g0423142	3.07921	0.304588
Os01g0882500	3.07658	1.07548
Os04g0515900	3.07651	1.65119
Os11g0611600	3.07317	0.514336
Os07g0556200	3.06841	0.837075
Os08g0454000	3.06834	5.20181
Os11g0119900	3.06794	1.4994
Os07g0452100	3.06723	2.54743
Os01g0522100	3.06669	0.5615
Os01g0235100	3.06649	1.30362
Os05g0423701	3.06239	1.13022
Os03g0293100	3.06121	1.1398
Os11g0701500	3.05775	0.301333
Os10g0453900	3.05573	0.847261
Os07g0113101	3.05539	3.57573
Os02g0114800	3.05514	0.802282
Os03g0613100	3.05461	1.3642
Os10g0351414	3.05356	1.39175
Os10g0580400	3.05239	1.03031
Os01g0372100	3.0514	0.730287
Os07g0654500	3.05071	0.706746
Os06g0218600	3.05003	1.05563
Os10g0150400	3.04889	0.897262
Os03g0639400	3.04774	1.25601
Os05g0268500	3.0457	0.707228
Os08g0189850	3.04396	0.722034
Os07g0533300	3.0438	0.00908887
Os04g0116600	3.04234	2.45426
Os10g0558900	3.04138	4.62993
Os04g0384800	3.03958	2.43937
Os07g0214600	3.03951	1.32067
Os01g0773700	3.03757	1.03676
Os10g0341750	3.03534	0.846717
Os02g0744000	3.03487	0.515495
Os07g0618266	3.03477	1.55496
Os11g0528812	3.02598	0.635046
Os06g0727900	3.02521	0.728725
Os11g0669100	3.02517	0.669232
Os12g0605850	3.02435	0.118874
Os10g0442466	3.0185	3.48066
Os11g0225000	3.01735	0.866428
Os08g0550850	3.01707	0.405633
Os04g0449300	3.01649	3.97905
Os09g0568700	3.01638	0.583699
Os01g0827800	3.01564	0.614089
Os09g0331600	3.01062	0.10533
Os05g0153200	3.00979	0.293928
Os01g0913300	3.00742	0.137628
Os10g0390900	3.00711	0.595336
Os01g0932650	3.00553	1.44392
Os07g0529600	3.00419	0.134565
Os06g0721800	3.00293	0.372163
Os08g0364100	3.00199	0.370127
Os02g0249900	3.00155	0.770996
Os02g0825650	2.99847	1.58008
Os08g0474866	2.99702	1.11165
Os11g0238400	2.99668	0.0958957
Os03g0150200	2.9942	0.854343
Os03g0389100	2.99303	0.910931
Os08g0453200	2.99244	0.151678
Os11g0664100	2.99167	0.414959
Os07g0645300	2.98781	0.907145
Os03g0766100	2.98488	1.35641
Os08g0331800	2.98418	0.945342
Os06g0552900	2.98334	0.564386
Os10g0516100	2.982	0.606132
Os12g0117350	2.9816	0.372903
Os07g0418500	2.98115	0.897436
Os02g0677600	2.98045	1.08809
Os03g0400000	2.98035	1.38847
Os08g0330900	2.98029	1.00874
Os03g0279950	2.97938	1.01918
Os02g0249800	2.97916	0.756652
Os09g0442400	2.97865	1.43557
Os02g0580900	2.97753	0.818472
Os10g0196100	2.97736	1.33536
Os10g0577500	2.97502	0.853662
Os07g0243150	2.97441	0.83282
Os01g0892500	2.97392	0.0972991
Os04g0587200	2.97177	1.44307
Os06g0543601	2.97054	0.957293
Os03g0415500	2.9695	0.493444
Os01g0207700	2.96731	0.111091
Os06g0132400	2.96462	0.591379
Os09g0554300	2.96319	0.0583149
Os11g0564800	2.96274	6.45782
Os04g0167900	2.96132	1.09779
Os01g0947000	2.9588	0.672692
Os02g0637000	2.95801	1.24016
Os06g0239500	2.95527	0.798619
Os04g0378066	2.95244	0.668063
Os06g0707350	2.95015	0.717772
Os05g0277000	2.94981	0.294437
Os05g0477200	2.94791	1.28838
Os07g0204400	2.94356	0.704311
Os05g0296750	2.94165	1.26008
Os06g0610800	2.94126	1.30936
Os10g0330000	2.94125	0.574372
Os08g0347200	2.94096	1.59442
Os11g0676050	2.9406	2.92577
Os11g0687200	2.94015	2.58399
Os10g0513400	2.9362	0.496697
Os05g0424000	2.93588	0.666317
Os01g0652700	2.93582	0.578971
Os02g0221100	2.93567	0.993096
Os06g0101600	2.93499	1.12403
Os10g0328700	2.93366	0.0842835
Os02g0612900	2.93183	0.718283
Os04g0659300	2.93119	0.105315
Os12g0569700	2.92665	0.51862
Os05g0109100	2.92604	0.221954
Os01g0157700	2.92603	0.708393
Os05g0215500	2.92507	0.658024
Os08g0229200	2.92473	0.800031
Os08g0323400	2.92434	0.995884
Os02g0174800	2.92417	0.304627
Os03g0369000	2.92322	1.37937
Os03g0251000	2.92109	1.03817
Os06g0697600	2.92047	1.12322
Os01g0522400	2.92023	1.45522
Os12g0530100	2.91963	0.43673
Os01g0252400	2.91957	1.40564
Os02g0678300	2.9189	3.33981
Os07g0206400	2.91814	1.10194
Os09g0490400	2.91299	1.17946
Os03g0363100	2.91231	0.91307
Os06g0112700	2.91055	0.0134872
Os07g0672700	2.91039	1.68192
Os03g0170200	2.90919	0.30275
Os05g0453401	2.90703	0.818456
Os02g0578400	2.90553	0.873581
Os07g0469200	2.90437	0.852787
Os01g0794900	2.8979	0.352478
Os01g0581300	2.89667	0.702109
Os07g0410700	2.89629	0.513653
Os01g0976300	2.89628	1.465
Os04g0533602	2.89379	0.245256
Os11g0198250	2.89139	0.6367
Os04g0382900	2.88785	0.7847
Os08g0477500	2.88756	0.931448
Os07g0106900	2.88749	1.40668
Os06g0284500	2.88513	0.761751
Os01g0884850	2.88479	0.999465
Os05g0458600	2.88266	1.11054
Os11g0167800	2.88259	0.987387
Os12g0448900	2.88118	1.26694
Os02g0641850	2.87844	0.505898
Os01g0111700	2.87241	0.165403
Os07g0290200	2.87209	0.3602
Os05g0176300	2.87042	1.22914
Os05g0258400	2.87007	0.929109
Os04g0516600	2.86805	1.0854
Os04g0570500	2.86661	1.42379
Os02g0535901	2.86502	0.713394
Os12g0161500	2.86466	0.0316482
Os11g0695800	2.86422	0.578679
Os03g0668033	2.86263	0.96829
Os04g0147600	2.86187	1.12183
Os03g0835150	2.85759	1.39789
Os06g0119300	2.85714	0.900256
Os01g0700100	2.85652	1.04439
Os05g0128100	2.85553	0.853296
Os07g0601600	2.85376	0.609901
Os07g0167700	2.85273	0.192592
Os02g0303500	2.8522	1.22289
Os01g0597800	2.85008	0.993257
Os11g0117300	2.84758	1.01085
Os03g0719000	2.8474	1.03191
Os01g0862200	2.84697	0.652664
Os07g0214300	2.84131	0.616629
Os09g0339000	2.83956	0.842421
Os01g0392600	2.83876	0.897734
Os05g0581300	2.83755	4.61497
Os08g0526200	2.83486	4.45666
Os12g0603300	2.83239	0.991434
Os11g0275200	2.83061	1.22766
Os02g0110900	2.82779	0.799653
Os04g0103900	2.82699	1.174
Os12g0630600	2.82573	0.249633
Os06g0497275	2.8243	0.335249
Os11g0133001	2.82376	0.787777
Os06g0119200	2.82372	0.569486
Os03g0371000	2.82312	1.42975
Os03g0674900	2.81994	0.773381
Os07g0117900	2.81815	0.668353
Os02g0300700	2.81783	1.0653
Os05g0146100	2.81544	1.03631
Os10g0148100	2.81311	1.13556
Os12g0608700	2.81252	0.325182
Os08g0544600	2.80976	5.7908
Os01g0197700	2.80798	1.14937
Os01g0716550	2.80609	0.465437
Os02g0786900	2.80257	0.588151
Os04g0182900	2.80129	0.271525
Os06g0314600	2.80121	0.700563
Os02g0626600	2.80102	0.1366
Os12g0291066	2.80097	1.06501
Os08g0476900	2.80064	0.146785
Os02g0676800	2.79946	1.10865
Os11g0703100	2.79111	0.349471
Os07g0638100	2.79016	0.0252473
Os11g0592350	2.79008	0.432898
Os12g0151000	2.79005	1.32518
Os06g0304300	2.78843	0.0175462
Os06g0196300	2.78826	0.448849
Os06g0708075	2.78703	0.415828
Os05g0231600	2.78625	0.655903
Os02g0585200	2.78613	0.145469
Os11g0259700	2.78461	0.351207
Os09g0535500	2.78403	0.346808
Os02g0202400	2.77814	0.37073
Os08g0404700	2.7779	0.885925
Os11g0656500	2.77327	0.423456
Os12g0256400	2.77295	0.480574
Os10g0148400	2.77034	0.771976
Os05g0574100	2.76933	0.785133
Os03g0195800	2.76912	1.19343
Os10g0116800	2.76846	0.682756
Os05g0518750	2.76644	1.04127
Os03g0150500	2.76466	0.658445
Os09g0482660	2.76022	0.506357
Os03g0820500	2.75991	1.71748
Os11g0569800	2.7586	6.25164
Os03g0789466	2.75557	0.52532
Os10g0196400	2.75475	0.926591
Os09g0530275	2.75265	0.0620609
Os12g0263050	2.7523	0.701226
Os03g0289400	2.75161	1.14422
Os11g0638200	2.75114	0.722271
Os11g0117500	2.75019	5.20778
Os04g0448300	2.74947	0.671462
Os08g0277200	2.74431	4.04609
Os01g0138800	2.7425	1.45795
Os01g0635200	2.73964	0.988001
Os09g0561482	2.73806	0.435677
Os06g0234300	2.73511	1.28702
Os07g0662800	2.73505	1.04546
Os11g0112200	2.73494	0.216403
Os07g0521300	2.73488	0.782996
Os06g0239200	2.73461	2.63456
Os02g0751600	2.73389	0.652971
[truncated: 18,213 more rows]

## Sheet: union average_min2_1FC
OS_GENEID	average	sdtev
Os01g0541000	15.0112	0.0165634
Os01g0728400	14.9309	0.0891272
Os01g0942900	14.8959	2.07341
Os01g0943800	14.6934	2.07059
Os07g0258100	14.6347	0.372205
Os11g0256300	14.5174	0.0566328
Os11g0696600	14.4149	0.828627
Os05g0546800	14.2279	0.00611568
Os01g0944200	14.198	3.4221
Os05g0547600	14.0862	0.0137097
Os11g0588600	13.8933	0.0218704
Os09g0566400	13.8831	0.00860388
Os01g0538000	13.8795	2.24586
Os02g0262800	13.8281	0.0258136
Os10g0163250	13.8227	0.0109485
Os03g0575500	13.8174	2.70491
Os12g0132000	13.734	0.721958
Os02g0825500	13.7085	0.79056
Os01g0943000	13.6992	0.0114141
Os06g0491800	13.6821	0.0933839
Os06g0580100	13.6693	0.411489
Os01g0943900	13.6599	0.012282
Os01g0947700	13.5539	0.00636854
Os01g0544700	13.42	1.03226
Os07g0236200	13.4178	0.37972
Os05g0547100	13.3152	0.0177181
Os02g0163400	13.3024	0.927158
Os09g0373800	13.2875	0.0224836
Os11g0297000	13.2769	0.98388
Os08g0363000	13.2275	0.148445
Os09g0436600	13.2053	0.0154388
Os11g0206000	13.2031	2.58483
Os01g0647850	13.1614	0.501423
Os09g0369400	13.1506	0.975214
Os06g0713400	13.0869	0.0146566
Os10g0131850	13.0314	2.81194
Os02g0163500	13.0139	0.187554
Os12g0203200	13.0071	0.10282
Os10g0136100	12.9913	0.0146527
Os12g0599625	12.9085	3.5106
Os03g0846200	12.864	0.0091415
Os02g0435400	12.8508	0.0186001
Os06g0731950	12.8506	0.047812
Os01g0518800	12.8202	0.0311611
Os12g0103580	12.795	0.957792
Os04g0330301	12.776	2.55292
Os11g0605100	12.7699	2.40995
Os11g0308100	12.7497	2.55945
Os01g0967600	12.7379	1.26156
Os11g0256400	12.7288	0.117849
Os12g0272500	12.7205	0.282626
Os06g0713300	12.6444	0.0234306
Os12g0254400	12.5467	0.0154715
Os09g0337300	12.511	1.93464
Os02g0163300	12.459	1.54558
Os02g0163533	12.368	0.256176
Os03g0390900	12.3562	0.0774657
Os09g0336600	12.2952	0.0734901
Os07g0434100	12.2743	0.0161058
Os04g0173300	12.2401	0.0170798
Os09g0372100	12.1979	0.0145892
Os01g0584300	12.1645	0.0230941
Os07g0582800	12.1537	1.10356
Os02g0435600	12.152	0.0127307
Os11g0687800	12.1472	0.0125496
Os01g0523000	12.1184	0.54098
Os12g0180900	12.1174	0.0150871
Os07g0549300	12.1024	0.261768
Os01g0158500	12.0858	0.0626812
Os10g0428200	12.0756	1.71922
Os10g0529800	12.0103	0.0107142
Os10g0322300	12.0095	0.128139
Os08g0125250	12.0032	0.470161
Os07g0220000	11.9717	2.44203
Os01g0540800	11.9665	3.07983
Os01g0879000	11.9504	0.725309
Os08g0301600	11.9112	2.74695
Os03g0382350	11.9084	0.972773
Os09g0436000	11.875	0.0158183
Os07g0255300	11.8692	0.174564
Os08g0330800	11.8586	0.0171965
Os11g0550500	11.845	0.537107
Os08g0124500	11.8001	0.557761
Os12g0547100	11.799	0.0150346
Os03g0582550	11.7906	0.0368803
Os11g0618700	11.7863	1.78867
Os06g0635500	11.7837	0.711758
Os01g0366100	11.766	0.559156
Os01g0587900	11.6845	0.012986
Os02g0727200	11.6773	0.0192303
Os11g0702000	11.6716	0.0119644
Os08g0185701	11.6392	0.2734
Os07g0528400	11.629	0.0269829
Os05g0155000	11.6222	2.2478
Os04g0325300	11.6202	1.91031
Os06g0240400	11.5786	0.542011
Os08g0226600	11.5517	0.0127881
Os03g0575700	11.5077	0.015851
Os01g0967400	11.4928	0.309204
Os01g0362400	11.4567	1.44696
Os11g0598200	11.4479	0.0115064
Os12g0545900	11.4446	0.0180659
Os11g0661900	11.4245	1.02424
Os02g0303200	11.4166	0.0163485
Os05g0547700	11.4089	0.620383
Os04g0405401	11.3773	0.015524
Os01g0521200	11.3673	0.867607
Os08g0263300	11.3358	1.21709
Os03g0667300	11.3349	2.07582
Os12g0621300	11.3228	0.012148
Os12g0483600	11.2972	0.0164883
Os08g0123833	11.2862	4.73261
Os10g0366400	11.2462	0.0130897
Os05g0297001	11.241	1.93028
Os11g0628000	11.1984	0.0113228
Os12g0109600	11.1862	0.439725
Os08g0454600	11.1807	0.0194272
Os09g0340400	11.162	0.992449
Os02g0163600	11.158	1.36818
Os09g0322500	11.154	2.08794
Os07g0236300	11.1423	0.125219
Os11g0579300	11.0921	0.0198992
Os01g0511700	11.0721	0.518678
Os12g0199200	11.0568	0.0122038
Os07g0230400	11.046	1.09719
Os10g0137300	11.0241	2.92256
Os11g0585200	10.9846	0.0206246
Os04g0420500	10.9785	0.0196925
Os01g0530100	10.965	0.46476
Os08g0236900	10.9437	0.645269
Os12g0197200	10.9427	2.9974
Os02g0807600	10.9351	0.0123318
Os06g0271400	10.9086	0.0118256
Os03g0233200	10.9051	0.802801
Os07g0219250	10.8963	1.51176
Os08g0383750	10.8899	0.457556
Os01g0612350	10.8828	0.227171
Os03g0441101	10.8753	0.0186473
Os05g0550650	10.8624	0.30254
Os01g0802400	10.8619	0.912393
Os05g0226000	10.8317	0.0200951
Os12g0425800	10.8144	2.48902
Os04g0429450	10.8095	0.624913
Os03g0754300	10.8078	0.0230805
Os08g0140700	10.7979	0.0152294
Os12g0564800	10.7963	1.19706
Os12g0472366	10.7929	1.72014
Os11g0202600	10.7886	1.54972
Os11g0608000	10.7742	2.96589
Os12g0226400	10.7737	3.13985
Os12g0254601	10.772	0.0145537
Os04g0152500	10.7586	1.89131
Os05g0389900	10.7407	0.881017
Os04g0677000	10.7387	0.00781864
Os04g0121900	10.7178	0.014847
Os06g0139150	10.6995	0.462356
Os09g0565000	10.6912	0.124697
Os01g0382200	10.6669	0.00713359
Os01g0359800	10.6559	4.45537
Os06g0138900	10.648	0.44232
Os08g0426000	10.6363	0.0144404
Os11g0550100	10.6218	0.885539
Os08g0235550	10.6106	0.0097543
Os09g0471500	10.6073	1.64243
Os03g0700500	10.6034	0.0135971
Os07g0445450	10.5823	0.0125858
Os11g0618300	10.573	0.15007
Os06g0682300	10.5657	7.92847
Os01g0862500	10.553	0.0135039
Os03g0643900	10.5508	1.42856
Os06g0178650	10.545	0.0218885
Os08g0170100	10.5412	0.410738
Os04g0170500	10.5389	3.88412
Os07g0219400	10.5107	2.11966
Os07g0648566	10.494	1.25173
Os07g0658550	10.4873	1.01038
Os04g0330900	10.487	0.0194455
Os12g0426750	10.4773	0.0211189
Os08g0233000	10.4526	1.67688
Os07g0226200	10.4403	0.449121
Os11g0606300	10.44	0.0236934
Os06g0178601	10.4357	0.244238
Os11g0676500	10.4217	0.113594
Os07g0219300	10.3742	1.3904
Os03g0415351	10.3715	1.67316
Os11g0686100	10.369	2.67956
Os11g0229600	10.3582	0.215395
Os03g0754200	10.3499	0.00938924
Os04g0170166	10.3422	0.0136954
Os12g0197600	10.3357	0.0162143
Os06g0699301	10.321	1.57573
Os06g0176801	10.3192	0.157363
Os11g0664500	10.3181	0.967686
Os03g0787500	10.3112	0.0170164
Os04g0411651	10.3073	0.0207546
Os05g0237400	10.3014	2.183
Os06g0184834	10.27	1.63345
Os11g0616100	10.25	1.31241
Os03g0697466	10.2399	0.129744
Os07g0617600	10.2239	0.0121314
Os10g0491100	10.2043	2.63192
Os07g0103000	10.1995	2.22923
Os05g0361500	10.1966	1.01558
Os01g0162701	10.1908	0.37646
Os09g0523700	10.1554	0.579346
Os05g0418600	10.1483	0.0178818
Os12g0549700	10.1374	1.20836
Os02g0264700	10.1287	1.65368
Os03g0812500	10.1246	0.754538
Os03g0598002	10.1214	0.497001
Os04g0127200	10.113	0.160192
Os11g0150800	10.1064	0.0184884
Os12g0210601	10.1012	2.12892
Os07g0140566	10.0759	1.00561
Os01g0601700	10.07	1.37982
Os04g0380000	10.0586	0.819018
Os02g0216100	10.0545	0.0527989
Os10g0450400	10.0325	0.0952886
Os12g0255200	10.0201	0.0135628
Os01g0879100	10.0079	0.35947
Os03g0422300	10.0073	1.65178
Os11g0258900	10.0045	1.2465
Os10g0365800	9.97399	1.60788
Os03g0582900	9.97219	3.39622
Os08g0369400	9.97141	0.0267584
Os07g0555850	9.97086	0.0403816
Os11g0229500	9.96068	0.80175
Os04g0489900	9.9398	0.0172378
Os06g0176850	9.92898	0.162621
Os09g0463800	9.88775	0.29829
Os12g0276550	9.88236	0.0117637
Os01g0366300	9.86692	0.358344
Os08g0363200	9.86363	4.19948
Os11g0146200	9.85182	0.85998
Os01g0946200	9.81852	0.0208561
Os05g0447800	9.81616	2.13215
Os11g0462900	9.81412	4.35986
Os09g0116600	9.81399	2.61192
Os11g0204600	9.81392	0.0240565
Os08g0185900	9.80734	0.189903
Os07g0232300	9.80039	1.35988
Os03g0708250	9.79432	8.30713
Os10g0571900	9.79328	0.0164905
Os12g0553800	9.7885	2.58181
Os11g0438000	9.78485	2.21808
Os02g0614966	9.76865	0.0158081
Os10g0552700	9.76384	0.959001
Os08g0263400	9.76242	3.51172
Os04g0420600	9.73953	0.477199
Os04g0660900	9.7339	1.6562
Os09g0339601	9.71873	0.0176917
Os12g0222650	9.71787	0.209745
Os12g0448400	9.70308	0.862158
Os08g0170200	9.69745	0.0220593
Os05g0199700	9.6903	0.0263635
Os05g0439200	9.67884	2.60938
Os12g0434601	9.65382	0.434297
Os07g0468900	9.64888	1.35083
Os09g0450700	9.64439	2.87809
Os11g0245900	9.63902	0.611395
Os12g0142900	9.63556	0.606328
Os11g0574200	9.61232	0.0129389
Os08g0255500	9.61176	0.0225333
Os01g0116000	9.60944	0.0224602
Os03g0673600	9.60932	2.37066
Os11g0485900	9.60693	1.58656
Os04g0172100	9.5734	0.0147767
Os10g0359700	9.56523	0.0261675
Os11g0618500	9.55749	1.62878
Os06g0241200	9.54537	1.48503
Os11g0223000	9.54409	0.0285729
Os12g0451300	9.53964	0.166928
Os08g0122201	9.51267	3.35609
Os03g0797500	9.51019	0.0209106
Os12g0545600	9.50129	3.19249
Os01g0158600	9.50039	0.431341
Os07g0658500	9.49071	0.264455
Os01g0201500	9.48281	0.0526826
Os12g0117900	9.47975	0.0149642
Os11g0697001	9.47552	0.478516
Os12g0518000	9.46263	0.0163271
Os06g0637800	9.44359	0.0173835
Os03g0180500	9.44341	1.04391
Os07g0273000	9.42091	0.769662
Os09g0471550	9.41533	1.85443
Os07g0456033	9.39144	2.19146
Os08g0246400	9.39114	0.0183731
Os11g0579100	9.34293	0.0202211
Os11g0690066	9.34274	2.45532
Os11g0459400	9.34226	0.0173405
Os11g0212000	9.33728	4.88834
Os02g0216150	9.32504	0.0491221
Os10g0569500	9.32431	2.10458
Os09g0322400	9.32014	0.5028
Os08g0236866	9.3067	1.39124
Os02g0433900	9.30154	2.34427
Os11g0503400	9.28265	3.20885
Os09g0561000	9.26102	0.410543
Os08g0125200	9.25691	3.91242
Os03g0400600	9.22967	1.06826
Os11g0579200	9.22061	0.0165729
Os06g0510200	9.21274	0.352293
Os04g0616400	9.20681	0.0170939
Os01g0940700	9.19662	2.59111
Os09g0344650	9.18569	1.96321
Os04g0370300	9.17054	1.76967
Os11g0550300	9.15409	1.05535
Os07g0115200	9.14882	0.371408
Os01g0690900	9.13479	0.805373
Os04g0367800	9.1342	1.27946
Os07g0111800	9.12532	0.0155367
Os08g0392700	9.1243	0.380268
Os01g0370750	9.11172	1.95928
Os01g0361000	9.09284	3.42259
Os01g0961000	9.09259	2.38098
Os09g0357300	9.08766	0.0532745
Os05g0538500	9.07024	0.0192991
Os07g0140633	9.06891	2.40155
Os01g0944100	9.05948	3.41883
Os12g0218600	9.04001	0.0161703
Os06g0218200	9.03663	2.66493
Os10g0499200	9.02626	0.0217271
Os12g0244000	9.02512	0.0294193
Os06g0329350	9.02038	0.0179613
Os06g0614550	9.00553	3.24322
Os07g0521400	8.97764	0.346878
Os12g0250700	8.93079	0.0155626
Os06g0648600	8.92685	0.380644
Os12g0549800	8.92336	1.61728
Os03g0732200	8.91599	1.54737
Os11g0204100	8.91056	0.293571
Os11g0661800	8.8933	0.0520341
Os01g0115700	8.89324	0.435708
Os08g0231400	8.89266	6.88144
Os01g0791033	8.8905	2.64305
Os05g0533400	8.89006	0.0139711
Os07g0482566	8.88009	0.0184639
Os07g0653300	8.87857	0.517966
Os12g0199100	8.86219	2.54438
Os04g0192775	8.85794	0.340815
Os03g0609000	8.85666	0.417113
Os04g0166300	8.85228	1.55035
Os11g0576975	8.8242	1.13306
Os12g0541200	8.81285	2.47306
Os11g0622200	8.79738	0.0386304
Os01g0967000	8.77778	1.57118
Os01g0539900	8.7598	5.133
Os03g0104901	8.73364	3.23023
Os02g0169700	8.71089	2.09924
Os11g0639100	8.69621	1.33693
Os12g0141900	8.69003	0.559201
Os04g0205200	8.68869	0.0542038
Os02g0308400	8.68726	0.0262735
Os04g0676800	8.68603	1.53527
Os09g0353400	8.67655	2.05348
Os01g0117050	8.67564	0.162854
Os08g0260800	8.67154	0.0249569
Os06g0634700	8.64928	0.0171575
Os05g0330150	8.64373	2.66372
Os06g0118301	8.63871	2.24799
Os03g0164200	8.62256	1.30163
Os01g0158566	8.60912	0.709137
Os05g0545900	8.60395	0.0164954
Os05g0349400	8.59505	1.25047
Os12g0222900	8.57685	0.415191
Os09g0268800	8.57643	1.15667
Os09g0453200	8.57154	2.33842
Os02g0330601	8.56436	0.0179735
Os05g0114800	8.56432	0.0224688
Os10g0135833	8.55026	0.0158315
Os11g0687001	8.51925	2.33582
Os04g0172400	8.51513	0.507306
Os08g0244750	8.51105	0.0182387
Os12g0204600	8.50835	2.15628
Os01g0152200	8.50711	1.15382
Os02g0282500	8.50372	2.77239
Os06g0233950	8.4993	0.015416
Os12g0509200	8.49279	4.01218
Os06g0524700	8.47234	0.340046
Os11g0481500	8.45585	0.0222234
Os12g0435000	8.44531	3.48673
Os07g0515700	8.44077	0.555985
Os03g0422200	8.43949	1.58233
Os08g0165901	8.43336	6.56064
Os11g0223400	8.42628	6.79816
Os12g0203900	8.42368	3.94081
Os01g0369600	8.41887	3.84353
Os05g0329700	8.40585	0.783657
Os07g0596200	8.38141	0.0251417
Os11g0689000	8.37889	0.259454
Os11g0223201	8.37624	6.80635
Os11g0625900	8.37578	0.0323945
Os08g0517150	8.36453	0.0185849
Os07g0541600	8.35942	0.398912
Os04g0632350	8.35709	2.02762
Os12g0180600	8.35491	1.50803
Os12g0226700	8.35369	0.0140821
Os04g0295901	8.34647	1.54462
Os06g0344201	8.34562	1.99401
Os07g0237700	8.33854	0.145581
Os08g0332100	8.33507	0.0172615
Os05g0211100	8.32407	0.0134247
Os11g0698567	8.2983	0.475652
Os06g0492700	8.28326	1.41805
Os07g0252200	8.28262	1.2639
Os12g0223000	8.27967	0.0683121
Os08g0186200	8.26825	0.741687
Os12g0520200	8.25887	0.0484879
Os11g0460700	8.25122	4.83957
Os04g0163700	8.23938	0.310196
Os04g0648400	8.22826	1.31696
Os11g0675200	8.22485	1.52842
Os09g0330000	8.21145	1.38866
Os07g0252300	8.2104	1.01304
Os07g0228000	8.20025	1.01458
Os12g0254825	8.19983	0.0154099
Os11g0696900	8.19513	0.0220235
Os07g0191401	8.19025	0.70122
Os06g0238600	8.18327	1.28826
Os10g0162842	8.17872	0.0149117
Os07g0521800	8.17614	0.848087
Os06g0630850	8.16161	0.0158765
Os06g0287700	8.14137	2.81742
Os11g0666000	8.13178	0.805725
Os11g0688200	8.12375	0.015524
Os04g0143566	8.11746	1.23499
Os01g0360100	8.11461	0.652199
Os12g0249100	8.10722	2.1356
Os07g0599600	8.10646	0.0238593
Os01g0359600	8.09561	1.37107
Os04g0616282	8.07744	0.0277135
Os07g0650200	8.05281	2.85028
Os06g0492000	8.05265	4.18116
Os06g0271500	8.05011	1.0422
Os12g0563000	8.03258	3.47541
Os11g0578250	8.0282	0.0164733
Os12g0509900	8.015	3.80326
Os06g0491901	8.00904	4.0849
Os04g0521100	7.98417	2.26331
Os02g0768400	7.98046	3.99166
Os02g0467200	7.97887	1.94087
Os09g0272900	7.96033	0.0231855
Os07g0521600	7.94917	4.613
Os02g0467400	7.94747	1.46997
Os05g0225800	7.94676	0.0251035
Os11g0249600	7.94049	1.17725
Os10g0109600	7.9293	3.2408
Os07g0651800	7.91868	0.0293355
Os06g0270950	7.91787	1.22696
Os12g0204200	7.89429	3.14852
Os05g0217800	7.89179	4.54953
Os11g0201401	7.89115	0.0226537
Os11g0249400	7.88743	1.17722
Os05g0232632	7.88591	0.0193864
Os09g0430701	7.87429	0.0197455
Os08g0132000	7.86735	0.546947
Os01g0101150	7.85579	4.80891
Os04g0630700	7.85004	0.0250618
Os01g0952000	7.83372	5.31484
Os02g0213450	7.83312	3.35227
Os01g0967700	7.83231	0.0172977
Os05g0171000	7.82648	0.00309832
Os12g0573900	7.81839	2.86685
Os11g0617800	7.80454	0.0220098
Os01g0657100	7.80379	0.0690535
Os01g0862400	7.79766	3.38829
Os11g0532600	7.77747	5.89686
Os02g0702700	7.77082	0.510022
Os09g0241700	7.76856	3.83474
Os12g0186600	7.76186	0.755671
Os01g0964333	7.7549	1.66392
Os12g0111000	7.75325	0.431448
Os08g0123600	7.74808	2.12489
Os10g0389300	7.74316	8.65116
Os12g0172150	7.73753	0.613429
Os04g0545600	7.73187	1.48686
Os05g0329200	7.72243	0.855535
Os03g0117432	7.71999	6.19285
Os05g0581000	7.71472	0.558762
Os10g0388701	7.70215	0.359098
Os11g0275500	7.69666	2.87336
Os03g0365200	7.68473	4.57036
Os01g0162800	7.67871	0.024655
Os11g0481600	7.67719	0.0227837
Os11g0274100	7.66837	4.80752
Os08g0240000	7.64723	0.165292
Os11g0691600	7.64124	0.0369679
Os01g0596425	7.64108	0.621201
Os12g0440300	7.60596	2.34031
Os12g0267400	7.58767	1.38282
Os01g0691050	7.58729	1.9934
Os06g0240001	7.58682	2.21969
Os09g0314800	7.55878	0.973749
Os07g0642100	7.54878	0.546813
Os01g0280200	7.548	2.06005
Os02g0807300	7.5479	0.0228497
Os12g0466200	7.54753	0.0616138
Os04g0345700	7.5439	1.53726
Os02g0445300	7.52248	0.568708
Os10g0525200	7.51119	0.0286691
Os06g0100550	7.50832	0.326601
Os03g0372950	7.50473	4.32079
Os12g0548800	7.50345	5.4957
Os12g0257900	7.49715	1.88896
Os11g0697350	7.49183	1.25599
Os01g0781833	7.47796	4.20904
Os01g0124900	7.47286	0.438879
Os07g0242050	7.47186	3.3608
Os11g0422000	7.46621	0.021149
Os11g0694500	7.46523	1.4559
Os07g0113100	7.45888	0.0368728
Os08g0124533	7.45022	5.36327
Os01g0921000	7.44578	0.0191737
Os01g0520800	7.44391	0.440226
Os07g0537701	7.44342	2.03164
Os06g0484950	7.44146	2.86548
Os11g0690154	7.43933	0.026961
Os04g0323800	7.43147	1.61175
Os09g0550500	7.42218	0.869377
Os09g0531701	7.4132	1.20648
Os11g0462850	7.41165	0.0200927
Os01g0937025	7.40786	1.73964
Os12g0250900	7.4027	0.518662
Os08g0184300	7.40077	2.35467
Os03g0426350	7.39961	6.16113
Os05g0217700	7.39818	3.28781
Os08g0124050	7.37883	5.23244
Os01g0945600	7.37492	2.17125
Os11g0249700	7.36545	1.48217
Os11g0616700	7.3647	0.0191359
Os06g0100700	7.36204	0.44888
Os09g0375700	7.3588	1.08518
Os01g0581800	7.35219	0.0208358
Os08g0396200	7.34524	0.674678
Os08g0238700	7.34314	0.330021
Os02g0566000	7.34156	0.0255078
Os07g0270800	7.3382	5.19251
Os06g0325900	7.32628	2.51352
Os01g0370900	7.3108	1.80379
Os02g0581600	7.30162	0.355278
Os05g0267766	7.28782	0.0715368
Os07g0169800	7.28743	0.0178798
Os11g0126800	7.28483	0.434341
Os02g0807750	7.27625	0.715669
Os02g0223300	7.27549	0.0622409
Os11g0702501	7.26776	2.11921
Os02g0313450	7.26026	3.77422
Os07g0646700	7.25089	0.907735
Os02g0596200	7.24763	1.21995
Os12g0234800	7.24718	3.28834
Os09g0486375	7.2438	0.022499
Os11g0251200	7.23198	1.21591
Os12g0510000	7.2296	0.377447
Os11g0590400	7.22555	2.07937
Os04g0621100	7.2159	0.414043
Os12g0518200	7.2096	4.45059
Os11g0493100	7.1952	3.45658
Os11g0250600	7.18756	0.421903
Os07g0142200	7.18511	2.95137
Os08g0226800	7.17423	2.73589
Os04g0617200	7.16894	0.0358477
Os04g0162701	7.16508	3.35576
Os12g0222800	7.15947	0.184956
Os01g0781600	7.14666	4.27867
Os11g0691650	7.13859	0.0268967
Os08g0280150	7.13771	0.256486
Os06g0732000	7.12943	0.511119
Os09g0433400	7.12151	0.0200785
Os01g0731600	7.11519	0.967178
Os02g0467300	7.11125	0.621137
Os03g0643433	7.10661	0.94024
Os02g0223200	7.10312	1.91135
Os01g0309451	7.10053	0.573762
Os03g0562400	7.08675	0.709937
Os03g0657400	7.08467	0.0245274
Os11g0471200	7.08216	0.019635
Os09g0290900	7.08215	2.41394
Os05g0330600	7.07608	0.0919337
Os09g0436200	7.07223	1.47172
Os11g0558200	7.06612	2.45506
Os12g0565100	7.06384	5.59635
Os10g0318900	7.05483	0.50809
Os11g0231200	7.03305	1.53141
Os06g0470500	7.03091	0.419857
Os01g0947833	7.02388	0.021595
Os11g0687900	7.01439	0.0253597
Os04g0475900	7.00926	0.030733
Os11g0577700	6.99695	0.0480826
Os11g0212100	6.9956	1.96316
Os11g0578225	6.99282	0.0280095
Os02g0584200	6.98596	1.8321
Os11g0527250	6.98357	3.09676
Os09g0415400	6.98187	0.0181313
Os03g0573750	6.97666	1.28502
Os12g0267500	6.9765	2.443
Os12g0447466	6.9761	5.54181
Os04g0163800	6.97599	0.0531426
Os07g0407700	6.95629	8.75853
Os04g0414700	6.94763	5.12826
Os03g0658000	6.94162	0.0443582
Os08g0105700	6.93886	3.57306
Os04g0194000	6.9337	5.15642
Os11g0119200	6.92375	0.261727
Os07g0237900	6.92322	1.00775
Os07g0564533	6.92322	2.20221
Os02g0103800	6.92238	3.86197
Os08g0200300	6.92236	1.78646
Os07g0144732	6.90088	2.62001
Os01g0562600	6.9002	2.01102
Os07g0599500	6.89795	0.0241607
Os08g0507000	6.88813	2.7211
Os08g0346800	6.88123	4.4223
Os08g0234400	6.87945	0.0188387
Os07g0146700	6.87659	0.0170609
Os09g0274800	6.87282	0.885781
Os12g0515800	6.87215	0.0474531
Os06g0185400	6.86602	0.0376977
Os08g0108001	6.86343	0.0210401
Os03g0610800	6.86253	0.708371
Os03g0735400	6.86116	0.637556
Os01g0391800	6.85999	0.619035
Os07g0532600	6.85611	1.50106
Os08g0189500	6.84923	4.77111
Os12g0145566	6.84058	0.492254
Os02g0288700	6.83987	0.0252159
Os01g0162900	6.83435	4.10762
Os11g0234001	6.83346	0.0219999
Os08g0344800	6.83225	2.21041
Os12g0211000	6.81666	1.75202
Os01g0562400	6.81464	4.27528
Os12g0541250	6.81138	0.0463195
Os08g0207800	6.80803	3.07642
Os04g0598500	6.80701	2.05191
Os12g0472300	6.79923	5.233
Os09g0517950	6.797	0.0835878
Os05g0436700	6.79603	0.252248
Os09g0531650	6.79016	3.07844
Os01g0539400	6.77179	4.17629
Os01g0352100	6.7703	0.182788
Os06g0325950	6.76447	2.9277
Os03g0689544	6.76231	4.93678
Os11g0460500	6.75757	0.85778
Os04g0307500	6.73694	1.03955
Os10g0111400	6.73388	0.0272454
Os03g0817700	6.72896	2.03658
Os11g0591550	6.70654	0.00614143
Os03g0162300	6.70346	0.0206242
Os07g0295601	6.70121	1.44574
Os11g0294800	6.69375	2.027
Os06g0700750	6.68447	1.99488
Os10g0388500	6.6842	1.84379
Os03g0558400	6.67917	1.03458
Os06g0254901	6.66758	0.0451005
Os08g0124000	6.66739	1.0416
Os12g0132500	6.66654	1.30941
Os01g0362800	6.66535	1.42733
Os09g0343200	6.65777	1.00006
Os08g0361300	6.65747	0.75347
Os01g0550800	6.6562	3.51566
Os11g0486000	6.65416	1.50964
Os06g0132801	6.65406	0.0257661
Os06g0295000	6.64199	4.17025
Os06g0585950	6.64015	2.22496
Os07g0271550	6.63257	1.38063
Os09g0356800	6.62646	0.0679124
Os01g0117600	6.61958	0.0200476
Os03g0271800	6.61213	0.82993
Os12g0454800	6.61185	1.57889
Os12g0222300	6.60697	3.54539
Os04g0435000	6.60227	2.6842
Os07g0482433	6.59158	0.0424927
Os03g0592500	6.59058	1.4258
Os12g0609200	6.58297	1.09697
Os07g0653100	6.58037	1.18732
Os04g0197500	6.58021	2.21474
Os07g0582700	6.57507	0.69524
Os03g0637600	6.56856	3.20442
Os03g0143150	6.56629	0.0943601
Os06g0335950	6.56273	0.0218829
Os07g0599900	6.55817	5.18951
Os01g0567200	6.55106	4.95023
Os06g0693100	6.54799	2.09515
Os02g0800750	6.54786	0.404339
Os07g0142300	6.53937	5.44359
Os04g0269100	6.52541	3.86357
Os03g0842501	6.521	2.17665
Os01g0608300	6.511	1.29423
Os11g0483000	6.50856	0.0751136
Os06g0320500	6.50346	0.346663
Os06g0347966	6.50133	7.01405
Os10g0185100	6.49571	0.0172502
Os01g0183600	6.49317	2.436
Os11g0688832	6.4894	1.36949
Os12g0282400	6.4864	2.42626
Os12g0180800	6.48582	1.1592
Os12g0509100	6.48255	4.74437
Os02g0271600	6.47466	2.87478
Os07g0611400	6.46455	1.30863
Os07g0146800	6.45741	1.40992
Os08g0515000	6.45118	3.34014
Os07g0521500	6.43986	0.345721
Os07g0558400	6.43605	0.914042
Os05g0425301	6.43502	0.0257007
Os09g0436500	6.43222	1.82326
Os03g0359600	6.42877	0.0397666
Os02g0772200	6.42844	0.143706
Os11g0540700	6.41342	1.43201
Os01g0165100	6.40952	3.89129
Os08g0410900	6.40922	3.97773
Os06g0621600	6.39762	2.52242
Os07g0510800	6.39658	2.10219
Os12g0524201	6.39581	0.121912
Os12g0108350	6.39486	0.0473532
Os02g0825166	6.38982	0.0493365
Os12g0265600	6.38538	2.84549
Os11g0242800	6.38088	2.02262
Os12g0265701	6.37941	1.34913
Os11g0183150	6.37197	2.46957
Os11g0666100	6.36698	2.01742
Os03g0199800	6.36275	0.649676
Os01g0703000	6.36002	0.0234115
Os01g0660450	6.35783	0.0321681
Os02g0226400	6.35289	0.332619
Os08g0435900	6.35123	1.29839
Os10g0339650	6.35058	0.809311
Os01g0943400	6.35014	1.4196
Os07g0664400	6.3482	2.20524
Os10g0451600	6.34666	2.46266
Os01g0600900	6.33974	2.36514
Os04g0401100	6.33929	0.0317781
Os09g0278700	6.33926	2.6327
Os02g0800433	6.3368	0.191907
Os09g0455300	6.33522	1.99056
Os07g0534600	6.33509	3.74691
Os02g0156500	6.32659	5.29677
Os10g0488300	6.32289	5.57456
Os06g0325350	6.31264	1.41264
Os09g0439500	6.31154	2.50617
Os09g0327575	6.30253	1.21964
Os08g0514600	6.29965	2.00265
Os11g0204800	6.297	0.0809886
Os07g0221300	6.29457	0.319484
Os06g0183600	6.29296	0.0560188
Os11g0606100	6.29181	0.021158
Os01g0549300	6.28999	2.73807
Os07g0241751	6.28439	4.03466
Os08g0347500	6.27855	4.07277
Os07g0146300	6.27591	0.0247302
Os11g0222900	6.27306	6.5528
Os01g0898600	6.26985	0.688078
Os07g0492200	6.26128	2.43347
Os07g0676800	6.25278	0.643182
Os08g0516550	6.24972	0.0200447
Os08g0355500	6.24707	0.887957
Os06g0303400	6.23395	2.99252
Os04g0368800	6.23347	2.46904
Os02g0200950	6.22879	3.24736
Os11g0531800	6.22572	7.98089
Os08g0165601	6.22353	4.69269
Os11g0643100	6.21932	4.68682
Os08g0189700	6.21877	1.9187
Os04g0369066	6.20749	3.02969
Os04g0112000	6.20453	3.25233
Os02g0801210	6.1984	0.0198386
Os02g0102800	6.19813	2.90221
Os03g0830600	6.19421	0.0620988
Os04g0366000	6.19079	1.4194
Os02g0310400	6.15979	0.0272613
Os12g0246700	6.15948	4.67085
Os07g0503200	6.15881	2.84133
Os03g0644850	6.15253	0.956942
Os02g0801255	6.15207	0.809608
Os11g0197433	6.14018	0.0787664
Os07g0255200	6.13766	0.369317
Os11g0430100	6.12847	2.65268
Os07g0535600	6.12552	0.925355
Os01g0654900	6.11681	0.32555
Os01g0393100	6.10875	2.68347
Os12g0207600	6.10399	0.606253
Os01g0691000	6.10245	1.90671
Os04g0225100	6.09921	2.15787
Os01g0870500	6.0976	1.16618
Os08g0507100	6.09433	3.94414
Os05g0221200	6.09105	2.86717
Os08g0234200	6.08128	0.294023
Os01g0786700	6.07997	0.0285117
Os10g0213700	6.07668	2.59416
Os01g0113450	6.07392	2.78927
Os03g0768450	6.07018	0.994318
Os08g0238200	6.06371	3.15075
Os03g0711100	6.06217	3.36286
Os08g0373400	6.06039	1.21232
Os03g0178600	6.05996	0.0350056
Os03g0165375	6.05428	0.935106
Os05g0552700	6.05152	2.74481
Os09g0554101	6.04609	2.92949
Os07g0582600	6.03968	0.0645402
Os11g0594800	6.03699	1.06145
Os03g0746000	6.03675	3.1525
Os04g0561800	6.0359	0.0298505
Os05g0448675	6.03224	2.71167
Os09g0490750	6.01781	1.50571
Os07g0107583	6.0154	2.31167
Os06g0627400	6.01118	0.0609267
Os12g0488600	6.01011	4.55769
Os05g0153300	6.00853	4.51385
Os10g0164500	5.99729	1.43723
Os06g0263801	5.97941	1.76234
Os10g0349300	5.97755	2.38966
Os05g0392900	5.97499	4.73023
Os01g0945700	5.97067	0.0588568
Os01g0383100	5.96819	3.76987
Os09g0425200	5.96565	3.39158
Os02g0482400	5.95625	0.0337284
Os03g0643611	5.94822	0.0201293
Os03g0243350	5.94774	2.98704
Os06g0314300	5.94728	2.38778
Os02g0286850	5.94272	2.14279
Os06g0486900	5.93777	3.0101
Os03g0675000	5.92119	2.47968
Os11g0682501	5.9198	0.0413406
Os06g0591400	5.91917	3.50711
Os02g0497600	5.91565	2.61354
Os10g0416800	5.91061	2.77228
Os12g0269100	5.91047	1.9827
Os09g0507200	5.90961	1.86031
Os10g0185200	5.90069	0.0335591
Os05g0438201	5.89875	2.46812
Os12g0204100	5.89553	4.69704
Os04g0299500	5.8946	4.60856
Os12g0182900	5.89174	0.0293944
Os10g0439800	5.89061	2.46409
Os05g0384600	5.89001	1.00885
Os07g0677600	5.88484	2.3541
Os10g0254720	5.88407	0.0533656
Os03g0271350	5.87761	4.4198
Os06g0242700	5.87583	3.26054
Os08g0235183	5.87025	0.642944
Os11g0682600	5.8655	0.99044
Os07g0132001	5.86003	4.56361
Os02g0825600	5.85873	1.11696
Os07g0600200	5.85194	1.59837
Os08g0543050	5.84491	1.27359
Os06g0337100	5.8442	0.034209
Os10g0504100	5.84338	0.785826
Os01g0944000	5.84219	2.76059
Os04g0370900	5.83956	2.25171
Os01g0266200	5.83788	0.583008
Os12g0292400	5.83693	4.99322
Os01g0813700	5.82901	0.944052
Os03g0722200	5.82397	7.23673
Os01g0609700	5.81477	1.70744
Os03g0580200	5.81243	0.0536158
Os04g0478000	5.80449	13.3585
Os07g0599700	5.79957	4.52531
Os08g0318400	5.79911	8.67027
Os05g0173800	5.79454	1.67617
Os01g0740300	5.79405	0.251172
Os04g0459500	5.78328	1.61966
Os02g0467500	5.78143	1.33337
Os04g0371500	5.78128	1.06194
Os04g0487000	5.77922	8.25847
Os11g0462800	5.77067	0.590565
Os01g0282251	5.76895	1.92511
Os08g0237800	5.75887	0.580507
Os12g0540100	5.75039	0.287723
Os12g0189400	5.74744	0.40435
Os10g0149000	5.74677	0.0767695
Os08g0335600	5.74516	0.136075
Os07g0175500	5.74352	4.75455
Os04g0388000	5.74098	0.320226
Os08g0181925	5.73818	0.70881
Os06g0697500	5.73618	4.17429
Os02g0211350	5.7303	0.0646597
Os10g0355800	5.724	2.20463
Os01g0144200	5.72007	1.11756
Os02g0119000	5.71972	1.18659
Os04g0542100	5.71526	2.50269
Os04g0371000	5.70694	0.0693069
Os07g0502550	5.7059	1.0326
Os02g0265100	5.70437	1.82227
Os04g0383700	5.70306	2.0092
Os04g0420700	5.70014	0.882596
Os10g0198900	5.683	0.0233884
Os11g0274166	5.68217	0.294422
Os11g0211300	5.6761	4.12319
Os04g0688500	5.66735	1.97355
Os04g0462400	5.66686	4.63299
Os07g0205900	5.65699	2.48203
Os12g0609100	5.65657	1.76176
Os12g0624700	5.63946	0.0399601
Os12g0210450	5.63824	1.95413
Os01g0164300	5.63385	1.94401
Os09g0402533	5.63108	0.0275462
Os09g0356100	5.62667	0.0667305
Os07g0628301	5.6257	2.27597
Os04g0337800	5.62134	0.0334223
Os11g0694100	5.61455	0.0472957
Os04g0510000	5.61216	1.6833
Os03g0565825	5.58868	0.0289585
Os06g0626200	5.58739	0.844691
Os02g0617075	5.58566	3.05842
Os12g0171801	5.57626	0.960088
Os11g0533800	5.57495	11.8735
Os10g0468600	5.56539	3.81534
Os06g0267400	5.5634	3.88025
Os11g0665950	5.56125	1.72631
Os06g0570600	5.55879	0.69049
Os02g0159100	5.55605	0.26002
Os11g0524601	5.55142	0.0333209
Os11g0155350	5.54006	0.324527
Os01g0702900	5.53588	0.95966
Os01g0610050	5.53506	1.92881
Os12g0412800	5.53491	3.00951
Os08g0102000	5.52832	1.49081
Os06g0324300	5.52795	0.241922
Os01g0537250	5.52455	0.0598893
Os04g0552200	5.52179	3.0946
Os09g0268700	5.51932	2.47368
Os05g0189425	5.51897	0.610678
Os08g0363800	5.51783	1.16113
Os12g0509600	5.51589	2.76219
Os11g0481301	5.51576	1.30921
Os08g0501700	5.51308	0.582976
Os11g0689800	5.51156	2.38036
Os01g0686100	5.50604	5.57672
Os01g0947800	5.50397	1.35864
Os12g0621050	5.50292	1.98499
Os07g0148900	5.49362	1.74431
Os07g0617500	5.49063	3.28628
Os05g0555450	5.48179	0.0380278
Os08g0349300	5.47662	3.5653
Os03g0862200	5.47171	0.669709
Os06g0254300	5.46178	0.889582
Os10g0107200	5.46153	0.062643
Os11g0116600	5.4505	0.987908
Os11g0262600	5.4493	2.06932
Os04g0606601	5.44727	1.61842
Os01g0866000	5.44144	2.37699
Os01g0688000	5.43691	0.80612
Os01g0303000	5.43374	3.66046
Os01g0114600	5.43188	8.10569
Os12g0629700	5.43038	1.11224
Os03g0259600	5.42074	2.20853
Os11g0622150	5.41704	2.05222
Os09g0555800	5.41657	6.95146
Os09g0346500	5.41321	1.09259
Os08g0236800	5.40609	2.27941
Os08g0486300	5.40221	2.03613
Os12g0478400	5.40021	2.7105
Os06g0587000	5.39261	1.82106
Os11g0251400	5.39177	3.28894
Os07g0562700	5.3873	1.56512
Os01g0269550	5.38148	2.71597
Os03g0164100	5.38117	0.12395
Os03g0675600	5.36896	1.47798
Os03g0717950	5.36887	0.784966
Os06g0264800	5.36879	0.38213
Os12g0605900	5.36636	0.0664441
Os07g0127500	5.35243	3.55619
Os01g0903100	5.35206	1.7902
Os12g0173400	5.35002	3.05576
Os01g0216900	5.34832	1.61821
Os06g0620000	5.34727	0.852062
Os02g0694900	5.3469	0.153041
Os03g0185400	5.3457	0.638327
Os12g0423484	5.33236	2.50052
Os07g0663200	5.32088	2.03803
Os12g0181300	5.31625	1.22241
Os01g0784500	5.31339	0.118207
Os06g0324150	5.30709	0.276534
Os06g0165900	5.30639	2.81646
Os08g0158300	5.30413	1.27776
Os05g0235701	5.29823	2.87666
Os04g0369000	5.2964	3.19826
Os07g0109800	5.29391	0.0555786
Os11g0621200	5.28661	0.0813255
Os03g0343900	5.27195	1.55334
Os10g0105750	5.27119	3.39183
Os03g0284700	5.26482	3.79292
Os07g0461800	5.26201	0.0676583
Os07g0273700	5.26161	1.69345
Os05g0449100	5.26147	0.432466
Os04g0389500	5.25572	0.633621
Os09g0564600	5.23717	1.2151
Os03g0416200	5.23325	5.71762
Os06g0113500	5.22688	1.6028
Os06g0606401	5.22344	0.0236581
Os02g0197600	5.21902	2.61377
Os04g0369600	5.21684	4.1888
Os04g0359900	5.21476	0.911049
Os11g0146000	5.21412	5.06373
Os12g0423313	5.21261	1.55464
Os12g0558400	5.21239	7.29801
Os05g0427800	5.20923	3.35994
Os06g0135000	5.20264	5.9524
Os05g0190500	5.20157	5.11161
Os12g0559200	5.2015	0.067006
Os11g0684400	5.19549	1.28291
Os04g0454200	5.19329	0.033393
Os04g0526300	5.18898	3.12487
Os06g0492101	5.18876	2.55071
Os07g0462132	5.18712	0.0355048
Os11g0670900	5.18619	1.46629
Os05g0117300	5.18406	4.35623
Os02g0282900	5.17577	1.62562
Os04g0591900	5.17572	3.47307
Os01g0382900	5.16917	0.0751622
Os10g0332733	5.1671	0.0326862
Os10g0198100	5.16279	2.59204
Os12g0178800	5.15972	2.48833
Os11g0664800	5.15675	1.93087
Os08g0270000	5.1485	3.04684
Os08g0125450	5.14055	1.35896
Os11g0539901	5.1392	3.71069
Os01g0158533	5.13662	1.58037
Os02g0126200	5.13647	1.68127
Os12g0184300	5.13005	3.28946
Os08g0265000	5.12353	1.61552
Os08g0180950	5.12248	1.97581
Os01g0959750	5.12194	2.57202
Os12g0170800	5.11584	0.00331093
Os11g0700100	5.11083	2.23147
Os11g0159500	5.10927	1.41856
Os02g0282301	5.10666	2.63021
Os01g0675400	5.10575	2.74714
Os12g0505800	5.10152	2.51208
Os07g0621201	5.09811	2.74466
Os03g0353333	5.09806	0.109968
Os11g0665600	5.09493	4.70282
Os05g0220500	5.09221	2.85005
Os11g0634350	5.09024	1.66596
Os01g0124700	5.07737	5.46611
Os01g0944500	5.07676	0.0386215
Os08g0226000	5.07304	1.08484
Os11g0630300	5.06895	1.93022
Os10g0529600	5.06431	1.56786
Os11g0441550	5.05866	2.51176
Os12g0621600	5.05776	2.35609
Os10g0550775	5.05282	2.15701
Os03g0129300	5.05225	0.999761
Os08g0561800	5.03942	2.31517
Os11g0171300	5.03356	0.979229
Os01g0115750	5.03054	0.808836
Os05g0190300	5.02827	5.02021
Os01g0960900	5.02806	1.55158
Os09g0287000	5.02777	0.920207
Os08g0227900	5.01699	0.0321647
Os01g0508500	5.01683	1.71654
Os01g0978500	5.01249	7.95453
Os07g0652900	4.99428	0.293893
Os06g0305400	4.99262	0.964074
Os06g0489900	4.99138	3.45174
Os04g0307466	4.99128	2.88319
Os08g0320200	4.9838	2.65692
Os03g0688000	4.98347	2.00951
Os02g0216250	4.9829	0.0243001
Os06g0319540	4.97298	2.00551
Os03g0839600	4.97119	0.590425
Os09g0247500	4.97071	6.34445
Os05g0206100	4.96322	3.00565
Os09g0307300	4.96283	3.81102
Os02g0287900	4.95841	0.0578839
Os11g0162700	4.95246	0.199813
Os09g0322900	4.94846	0.806956
Os06g0570566	4.94712	0.865022
Os05g0157600	4.94644	0.523611
Os06g0232650	4.94018	1.93804
Os03g0108300	4.93816	3.76809
Os03g0368950	4.93282	0.0795351
Os02g0303000	4.9306	0.0363749
Os01g0963000	4.92811	2.91388
Os09g0279400	4.91973	3.29151
Os08g0239300	4.91449	2.83279
Os06g0641500	4.91335	1.82588
Os10g0523201	4.91307	1.20483
Os09g0238700	4.90818	1.04699
Os10g0371100	4.90771	1.22699
Os11g0655300	4.90593	2.34381
Os12g0420400	4.90531	2.54506
Os03g0574900	4.90255	0.629254
Os10g0567900	4.89637	1.54929
Os02g0698000	4.8952	1.02147
Os12g0576100	4.89367	0.389545
Os03g0234100	4.89364	2.46539
Os01g0910800	4.88967	2.38996
Os05g0232200	4.88877	2.14378
Os12g0468000	4.88703	2.5747
Os08g0459700	4.8855	0.108664
Os01g0950000	4.88059	3.48199
Os12g0189700	4.87957	2.11128
Os01g0509700	4.8752	1.94824
Os11g0540100	4.87015	4.44029
Os05g0439000	4.86718	1.9557
Os04g0614500	4.86296	2.11483
Os02g0808300	4.85974	2.52236
Os07g0459500	4.85959	2.34038
Os12g0116200	4.85093	1.48837
Os04g0496950	4.84312	5.03617
Os05g0329300	4.84197	0.286044
Os11g0470966	4.83186	1.05642
Os02g0498100	4.82562	3.42039
Os05g0198100	4.82512	2.18855
Os11g0202500	4.82504	0.119341
Os09g0440851	4.81586	0.0414657
Os04g0371100	4.81517	1.93366
Os10g0162844	4.81173	0.131182
Os02g0577700	4.80766	2.37384
Os06g0689700	4.8025	1.68536
Os11g0555300	4.79781	0.588668
Os01g0902800	4.79133	0.176029
Os04g0167300	4.78513	0.852895
Os09g0499400	4.78001	2.32504
Os06g0335900	4.77811	1.8854
Os02g0639100	4.77517	3.48565
Os09g0561450	4.7707	1.23132
Os12g0420200	4.76349	1.08345
Os07g0653900	4.75954	0.472297
Os06g0483200	4.75808	1.98907
Os11g0227800	4.75787	3.04276
Os10g0478750	4.75566	2.51453
Os10g0122400	4.7467	2.9007
Os12g0265201	4.74244	0.0868401
Os07g0409200	4.74213	0.0406837
Os04g0259200	4.74058	1.43331
Os10g0135650	4.73449	0.0865274
Os03g0673700	4.7342	0.863764
Os12g0226900	4.73344	0.267862
Os01g0383001	4.73174	0.0484185
Os10g0122500	4.7275	2.89291
Os07g0492966	4.72654	1.62607
Os04g0300100	4.72501	0.112526
Os12g0450500	4.72093	3.60685
Os05g0372900	4.71536	1.37481
Os01g0563000	4.70638	1.91236
Os12g0552200	4.7047	0.0928025
Os11g0146100	4.70112	1.30176
Os10g0318700	4.7005	0.428062
Os01g0320400	4.69622	0.213629
Os07g0486700	4.68822	0.246161
Os07g0142500	4.6847	4.88181
Os06g0335975	4.681	1.29713
Os11g0189600	4.67433	1.43679
Os11g0543900	4.67331	1.21637
Os07g0649500	4.66859	2.07552
Os02g0166200	4.66817	3.41181
Os09g0506450	4.66502	2.98804
Os03g0807900	4.66014	1.09759
Os03g0803066	4.64989	6.31588
Os06g0174700	4.64649	0.0950812
Os05g0588100	4.64637	0.595041
Os12g0207500	4.64135	1.45999
Os10g0532800	4.63889	1.4304
Os08g0202350	4.63511	3.32886
Os12g0150500	4.63416	0.433489
Os07g0273600	4.63402	1.11847
Os11g0245400	4.6305	2.12869
Os03g0643522	4.61325	2.17159
Os04g0343050	4.60868	0.796357
Os04g0578300	4.60628	3.58792
Os05g0329100	4.6043	0.287867
Os04g0377500	4.60414	0.137532
Os11g0252400	4.60065	1.15369
Os02g0773732	4.59105	2.34888
Os01g0899387	4.58454	1.15857
Os03g0844900	4.57897	0.914194
Os02g0635400	4.57427	2.84638
Os03g0722000	4.56702	0.841791
Os08g0399900	4.5658	2.95664
Os03g0234900	4.56486	0.74873
Os08g0496700	4.55748	0.0364326
Os04g0191600	4.55492	4.17358
Os09g0550400	4.55332	0.0923725
Os02g0493200	4.55063	0.0970091
Os12g0410000	4.5479	2.06332
Os03g0847500	4.54753	0.592081
Os01g0567600	4.54668	0.108556
Os05g0215066	4.54419	4.79071
Os05g0489500	4.53932	1.36374
Os10g0536050	4.53732	0.00379785
Os10g0527601	4.53411	3.83446
Os11g0636050	4.53224	2.44465
Os04g0429087	4.53185	0.508711
Os05g0355900	4.531	0.215352
Os05g0561400	4.53098	3.36691
Os06g0313320	4.53003	3.1322
Os06g0271300	4.52407	2.73887
Os09g0469300	4.52142	2.89897
Os03g0339400	4.51696	1.16394
Os07g0622400	4.51529	2.89456
Os06g0234600	4.51269	3.24949
Os10g0118200	4.51136	3.09077
Os01g0143400	4.50753	1.04731
Os05g0160300	4.50517	1.93944
Os12g0265400	4.50445	1.75775
Os05g0270500	4.4998	0.708481
Os07g0673550	4.49944	1.34451
Os06g0235800	4.49933	7.20953
Os01g0586800	4.49081	3.28147
Os03g0639300	4.48752	1.05632
Os01g0114550	4.48252	1.57109
Os05g0328333	4.48035	0.489217
Os08g0438801	4.47862	0.140565
Os12g0610100	4.47743	1.74559
Os09g0344400	4.47691	0.182528
Os03g0664400	4.47433	3.21926
Os08g0204632	4.47117	0.749494
Os02g0212975	4.46857	1.80651
Os07g0497500	4.46837	0.0880423
Os07g0122100	4.46564	0.993574
Os09g0566300	4.45446	5.66616
Os06g0316800	4.45324	0.50592
Os08g0189600	4.44967	1.44854
Os02g0793400	4.44758	0.678436
Os03g0415700	4.43765	0.153923
Os05g0158200	4.43601	3.19754
Os11g0205300	4.43558	2.78538
Os11g0228201	4.43337	0.0232365
Os12g0424180	4.42809	0.678354
Os12g0524750	4.42567	0.977501
Os07g0122000	4.42278	1.36607
Os11g0697100	4.41805	0.447239
Os07g0228400	4.41258	0.173014
Os07g0663700	4.41107	1.42466
Os10g0103500	4.40117	0.165655
Os12g0225900	4.39881	0.74097
Os03g0624600	4.3979	0.51145
Os01g0719350	4.39574	1.99339
Os12g0135500	4.3953	1.03571
Os01g0154950	4.39491	2.34303
Os01g0676800	4.39189	1.935
Os12g0179951	4.38749	2.7851
Os05g0166600	4.38575	2.13369
Os04g0554800	4.38396	0.5005
Os10g0205400	4.38203	4.12592
Os01g0163000	4.37689	0.421911
Os06g0620200	4.37028	3.11515
Os03g0743650	4.362	0.197631
Os05g0378200	4.35456	1.77981
Os12g0471100	4.35291	3.4255
Os10g0198333	4.35246	0.498642
Os07g0631500	4.35207	0.507977
Os09g0446700	4.34194	0.213954
Os03g0264075	4.33564	0.0323082
Os06g0263450	4.33537	0.641623
Os05g0406550	4.33404	0.225622
Os05g0332000	4.33338	0.298943
Os01g0237000	4.32904	0.0912465
Os07g0660100	4.32115	1.97334
Os10g0213966	4.31742	2.40265
Os12g0424300	4.31411	1.07179
Os11g0199000	4.31371	0.931025
Os09g0518750	4.30368	3.33095
Os01g0740800	4.29931	5.43977
Os12g0292301	4.29842	3.68459
Os10g0209700	4.29644	0.390165
Os10g0392900	4.29635	0.327809
Os04g0204000	4.29479	1.6152
Os06g0243801	4.29137	0.321144
Os11g0707000	4.28804	0.932905
Os05g0210700	4.28768	2.39402
Os02g0120700	4.27711	2.71491
Os07g0681350	4.2756	3.39178
Os06g0585982	4.27537	0.741729
Os01g0731100	4.27417	5.92647
Os12g0610800	4.27283	2.53848
Os08g0165800	4.26925	2.57889
Os08g0387050	4.26812	7.37738
Os01g0372350	4.26774	0.604051
Os08g0114100	4.266	1.83733
Os02g0276200	4.25874	2.01826
Os12g0212400	4.25785	1.83209
Os01g0593700	4.2539	1.05784
Os04g0468000	4.25006	1.67494
Os12g0409800	4.24972	0.063958
Os08g0510101	4.22946	0.157834
Os11g0579600	4.22764	0.270418
Os05g0329001	4.22381	0.0280963
Os04g0429050	4.22083	1.9714
Os10g0381601	4.21766	1.62042
Os09g0356200	4.21626	1.13713
Os07g0542232	4.21444	0.121335
Os04g0115700	4.21338	1.19953
Os11g0471300	4.21243	2.84114
Os12g0493900	4.20772	1.39459
Os11g0211200	4.20162	0.472206
Os10g0159167	4.20019	2.30526
Os08g0178900	4.19928	1.53235
Os11g0244100	4.19688	2.38605
Os10g0329900	4.19341	0.00662313
Os01g0501800	4.18342	1.21526
Os02g0288400	4.17766	1.40413
Os04g0370100	4.17256	4.07817
Os03g0306800	4.17151	0.921716
Os03g0648250	4.16402	1.13985
Os08g0519300	4.16396	1.70397
Os04g0445025	4.16001	1.11517
Os05g0574000	4.15134	0.883851
Os03g0259001	4.15096	5.26635
Os12g0123600	4.14733	0.0393624
Os02g0725700	4.1449	3.25341
Os11g0656601	4.14257	1.28986
Os11g0229700	4.1423	5.70497
Os01g0110200	4.14227	1.48753
Os12g0289833	4.14138	0.275743
Os08g0209000	4.13591	0.733222
Os06g0671000	4.13477	0.531265
Os02g0576400	4.13181	0.63208
Os12g0281300	4.13062	0.747281
Os02g0731700	4.11442	0.586973
Os11g0206850	4.11304	0.544381
Os08g0389601	4.11113	4.84464
Os11g0220500	4.10987	0.112445
Os05g0328901	4.10726	0.30492
Os09g0103300	4.10559	0.050452
Os01g0162200	4.09889	0.748208
Os02g0194700	4.09889	0.240741
Os12g0137700	4.09563	3.02875
Os09g0534600	4.08963	0.342433
Os03g0814500	4.0881	2.3603
Os08g0546800	4.08288	0.720931
Os08g0376500	4.08227	1.09172
Os09g0358000	4.07728	1.23179
Os08g0189300	4.07005	1.78542
Os06g0274800	4.06694	4.77992
Os04g0423400	4.0663	1.0305
Os12g0258700	4.05714	2.10179
Os04g0473150	4.05673	1.99117
Os01g0517900	4.0559	0.586219
Os11g0256900	4.05015	0.288765
Os01g0976200	4.04962	1.81878
Os04g0630900	4.04901	0.163683
Os11g0535525	4.04438	1.49692
Os07g0681300	4.04437	1.3022
Os08g0101700	4.04395	1.71087
Os10g0514500	4.0423	2.01806
Os02g0166600	4.03842	4.04889
Os05g0329350	4.03836	0.504788
Os09g0424200	4.03678	1.68913
Os11g0219400	4.03619	2.17624
Os11g0660400	4.03618	0.904361
Os11g0569300	4.03369	0.0499486
Os10g0204300	4.03266	2.58201
Os08g0170700	4.02999	1.19038
Os02g0732800	4.02922	2.59046
Os04g0155200	4.02849	0.585184
Os06g0178800	4.02677	2.47981
Os05g0309000	4.01408	0.912192
Os08g0282700	4.01087	3.0569
Os05g0159501	4.00869	0.0141147
Os06g0123000	4.00724	1.81318
Os06g0718000	4.00701	3.24446
Os03g0176100	4.00143	4.60501
Os01g0940800	3.99628	1.10667
Os11g0246300	3.99394	2.01715
Os08g0478000	3.98062	2.20511
Os12g0103540	3.97136	4.18341
Os04g0164300	3.97122	8.07634
Os12g0575000	3.96964	0.730134
Os05g0560000	3.96815	1.14589
Os06g0119900	3.96707	0.175517
Os08g0104600	3.96471	1.58105
Os06g0317400	3.96082	2.71536
Os12g0422971	3.95288	1.33781
Os03g0307300	3.95033	2.09192
Os10g0344500	3.94763	2.92787
Os09g0271100	3.94622	0.202615
Os08g0170800	3.94037	0.880799
Os07g0407350	3.93771	0.00484182
Os07g0148200	3.93236	1.4767
Os09g0306566	3.93089	3.43658
Os02g0282600	3.92436	1.89801
Os03g0759125	3.92216	2.59718
Os11g0246133	3.9212	1.8219
Os06g0235900	3.91944	0.688568
Os12g0207000	3.91791	0.158539
Os02g0709000	3.91647	2.03538
Os07g0575366	3.91643	0.380622
Os11g0649700	3.91374	0.113187
Os01g0784450	3.91371	0.358243
Os05g0175450	3.91166	0.428904
Os05g0131500	3.91013	0.691343
Os02g0731600	3.90809	3.63725
Os11g0125700	3.90802	1.38572
Os09g0517000	3.90746	0.646146
Os07g0650300	3.90494	0.441633
Os01g0714800	3.90153	0.713425
Os01g0215000	3.9003	7.64999
Os04g0290750	3.89989	1.52155
Os11g0594500	3.89905	3.20976
Os06g0535200	3.89779	1.15811
Os11g0701000	3.89634	1.36528
Os09g0314500	3.89477	3.36671
Os11g0686900	3.89391	1.34118
Os03g0644700	3.89274	0.203505
Os07g0562400	3.8892	0.483631
Os10g0213100	3.8884	8.76243
Os06g0621500	3.88633	2.2946
Os06g0585900	3.88147	1.02234
Os07g0212200	3.88086	0.336484
Os11g0620500	3.88082	0.0101198
Os08g0539700	3.8802	1.64611
Os07g0602800	3.87625	0.0126268
Os02g0781300	3.87087	0.0101004
Os03g0307200	3.8666	0.512092
Os01g0894700	3.86183	1.21456
Os11g0604900	3.85727	0.0214782
Os07g0141400	3.85085	0.933863
Os04g0651000	3.84832	1.18666
Os01g0824900	3.84417	1.23255
Os05g0206000	3.84277	2.20241
Os01g0144100	3.84189	0.850964
Os12g0639400	3.84141	2.47586
Os01g0585400	3.83995	0.418061
Os10g0181600	3.83203	1.26732
Os03g0355500	3.83099	0.788025
Os04g0415800	3.8238	0.168855
Os12g0144200	3.82072	0.751762
Os05g0487100	3.82066	0.201133
Os10g0422050	3.82	1.76778
Os01g0653500	3.8067	1.76868
Os12g0509400	3.80353	4.56532
Os11g0519500	3.79978	2.02681
Os01g0283400	3.79976	1.00823
Os05g0245300	3.79959	1.09609
Os02g0492000	3.79667	10.0385
Os03g0284650	3.79448	1.5243
Os04g0200400	3.79206	1.08259
Os03g0824350	3.78635	1.12776
Os01g0289732	3.778	4.53426
Os10g0409400	3.77615	1.56383
Os08g0294300	3.77555	0.18616
Os03g0592100	3.77548	0.224616
Os05g0342100	3.77326	3.38425
Os02g0614800	3.76853	1.01686
Os08g0119800	3.76776	0.421896
Os11g0126500	3.76649	0.126663
Os06g0241400	3.76398	0.0310801
Os09g0511900	3.76395	2.66813
Os09g0493000	3.75681	1.59257
Os02g0583700	3.75243	1.35989
Os03g0368900	3.75124	1.14536
Os04g0457300	3.74252	1.46315
Os04g0555700	3.73998	1.17649
Os03g0643800	3.73873	3.02924
Os05g0429100	3.73855	0.982338
Os07g0632000	3.73808	0.282698
Os07g0124300	3.73802	1.61001
Os12g0637400	3.72734	0.178634
Os06g0594650	3.72694	0.306637
Os12g0637200	3.72082	0.284692
Os07g0216600	3.72001	1.37656
Os08g0489300	3.71815	0.642337
Os09g0379600	3.70542	0.476194
Os01g0731150	3.70281	3.08262
Os10g0142600	3.70068	0.189514
Os11g0556400	3.69951	0.113459
Os02g0720600	3.69761	0.400102
Os10g0439100	3.69684	2.17075
Os12g0175400	3.69282	1.8317
Os03g0598600	3.68707	0.0133493
Os11g0643400	3.68627	1.26461
Os02g0118950	3.68546	4.15621
Os12g0575300	3.68468	1.2289
Os03g0197100	3.68392	1.04923
Os06g0317600	3.68215	0.00831734
Os01g0254850	3.6805	1.72573
Os04g0444400	3.67382	2.00603
Os06g0671300	3.6714	0.104447
Os01g0869800	3.66637	0.988634
Os11g0480000	3.66361	7.281
Os06g0274550	3.66009	0.553036
Os07g0577600	3.65964	1.25884
Os01g0696800	3.65877	0.859766
Os04g0476650	3.65598	1.9452
Os01g0690800	3.65244	1.4316
Os08g0151300	3.64832	2.26723
Os03g0793800	3.64667	2.51064
Os01g0356800	3.64615	1.04244
Os03g0339300	3.63984	0.992581
Os03g0759375	3.6394	1.45394
Os07g0521100	3.63852	1.02389
Os06g0295900	3.63711	1.62055
Os01g0159250	3.63602	0.428411
Os05g0568300	3.63481	1.09069
Os12g0467700	3.63063	0.638525
Os06g0591200	3.62749	1.6501
Os01g0854800	3.62688	1.61644
Os01g0827300	3.62686	1.46583
Os10g0191900	3.62594	1.5223
Os06g0257600	3.62324	2.95396
Os06g0705901	3.62271	0.761151
Os12g0411700	3.62028	1.75332
Os08g0340700	3.61791	0.0331584
Os02g0494000	3.61753	0.808938
Os05g0472400	3.61743	1.92403
Os04g0584201	3.61174	4.2679
Os03g0165350	3.60532	0.256905
Os05g0417700	3.60513	0.648113
Os09g0482500	3.59453	1.25752
Os05g0267732	3.59203	4.23207
Os04g0613950	3.59	1.45512
Os01g0360150	3.58822	0.254053
Os03g0154300	3.58717	0.602662
Os10g0468950	3.58671	1.29404
Os11g0549620	3.58664	2.15109
Os09g0482860	3.58492	1.35987
Os11g0700900	3.58201	1.45991
Os09g0482200	3.57874	1.31935
Os11g0134100	3.57861	1.11956
Os05g0568800	3.57722	4.23071
Os03g0293600	3.5771	0.086439
Os02g0477300	3.57249	14.7889
Os10g0150600	3.57193	0.60203
Os03g0305950	3.57012	1.20528
Os07g0550600	3.56921	1.06862
Os02g0110500	3.56775	2.03919
Os05g0163300	3.56675	4.01803
Os05g0328466	3.56608	1.43082
Os08g0158600	3.56377	0.250829
Os03g0124000	3.56131	0.00835442
Os03g0266900	3.56107	0.134358
Os02g0729400	3.55944	0.881814
Os05g0458500	3.55335	0.971279
Os10g0103700	3.54939	1.07227
Os12g0131900	3.54528	0.831805
Os12g0111500	3.54442	1.40299
Os08g0208300	3.53821	1.21037
Os04g0273900	3.5374	0.44058
Os07g0620600	3.53732	1.49832
Os10g0172000	3.53369	2.56426
Os10g0163370	3.53209	0.399785
Os01g0208000	3.53044	0.00835505
Os01g0298400	3.53001	1.24541
Os05g0341450	3.52999	1.90746
Os08g0564000	3.52986	1.89996
Os01g0301500	3.52945	0.518334
Os03g0360300	3.52917	0.545829
Os11g0129000	3.52845	1.24146
Os07g0170900	3.52234	0.230067
Os08g0105800	3.52042	0.124162
Os07g0435300	3.51921	0.923898
Os08g0106801	3.51917	1.27534
Os10g0199500	3.51884	1.07372
Os11g0550800	3.51653	1.33946
Os02g0582900	3.51651	1.53475
Os10g0496900	3.51474	1.16162
Os08g0102800	3.5113	0.0400005
Os01g0115725	3.50895	2.58432
Os04g0477900	3.50864	10.674
Os05g0594001	3.50827	1.72098
Os05g0135400	3.50785	0.722503
Os02g0618400	3.50163	4.41745
Os07g0634400	3.49553	2.05787
Os11g0340477	3.49411	1.14503
Os03g0815332	3.49303	3.87042
Os01g0698200	3.49222	4.27495
Os01g0838300	3.49164	0.795794
Os02g0148700	3.49134	1.81038
Os04g0326300	3.48911	0.106034
Os07g0142802	3.48351	0.0508526
Os02g0517333	3.47717	4.12912
Os03g0124100	3.47451	1.12017
Os01g0348000	3.47024	1.81315
Os11g0435800	3.46908	2.27608
Os07g0102100	3.46233	1.39837
Os11g0304050	3.46171	0.528422
Os10g0343951	3.45984	0.272346
Os05g0427900	3.4557	1.03208
Os08g0265300	3.45283	1.34254
Os01g0117000	3.45177	0.495265
Os03g0710500	3.44977	0.62091
Os04g0659200	3.44947	1.45436
Os01g0602400	3.44915	1.29077
Os04g0371600	3.44841	1.04382
Os02g0766900	3.43585	1.41038
Os12g0550800	3.43435	2.09843
Os01g0837600	3.4326	1.37669
Os01g0120300	3.43193	0.455561
Os07g0486400	3.43076	1.6896
Os01g0182100	3.42671	1.01585
Os02g0599200	3.42595	0.481972
Os03g0808000	3.4253	0.175026
Os08g0125112	3.41877	0.649752
Os05g0460000	3.41765	0.267275
Os06g0264200	3.41692	0.810312
Os08g0113000	3.4157	0.517797
Os11g0299300	3.41256	5.14018
Os01g0730500	3.41155	0.157213
Os06g0268500	3.40906	1.74815
Os01g0942300	3.40833	1.21577
Os07g0222000	3.39905	0.941594
Os02g0768300	3.39783	1.02528
Os04g0422900	3.3973	0.629114
Os12g0629600	3.3972	4.20738
Os03g0687100	3.39551	0.236382
Os07g0511201	3.3939	0.16481
Os07g0693100	3.39388	0.766043
Os01g0668500	3.39252	0.58069
Os04g0490800	3.38606	0.774735
Os08g0482025	3.38455	2.74009
Os10g0131701	3.38209	0.693864
Os07g0600000	3.38149	0.0157549
Os05g0135450	3.38013	0.714975
Os07g0649200	3.38007	0.736281
Os02g0504000	3.37835	0.677733
Os04g0234600	3.37789	1.17423
Os02g0806000	3.37467	0.653474
Os10g0392800	3.37442	0.45518
Os11g0598000	3.37379	0.434049
Os10g0532300	3.37204	0.710131
Os06g0131700	3.37072	0.671789
Os05g0135500	3.36919	4.09398
Os04g0657900	3.3671	1.25353
Os06g0299100	3.36668	0.195091
Os03g0635000	3.36176	0.894979
Os08g0174000	3.36167	0.888551
Os07g0105800	3.3614	0.755326
Os01g0135900	3.36116	0.770669
Os10g0525400	3.35687	1.77558
Os06g0715200	3.35398	0.470747
Os12g0134900	3.34769	0.482396
Os11g0677101	3.34528	1.29903
Os01g0795600	3.34519	1.05569
Os01g0311600	3.34355	0.192269
Os06g0507200	3.34125	1.31735
Os02g0240100	3.33987	2.09601
Os10g0515900	3.33711	1.56798
Os06g0299300	3.3302	0.272291
Os09g0535200	3.32305	0.870994
Os10g0182300	3.31812	1.63556
Os07g0673600	3.31781	1.00588
Os06g0645100	3.31537	0.668154
Os01g0249900	3.31283	0.493352
Os07g0507850	3.3122	1.23942
Os02g0810900	3.30892	0.987755
Os01g0734000	3.30758	3.76062
Os06g0109300	3.30537	0.398797
Os02g0815300	3.30254	1.15367
Os04g0572500	3.29965	0.349005
Os08g0488700	3.29949	2.31695
Os10g0108800	3.29859	1.33219
Os11g0489250	3.29692	1.23457
Os12g0562166	3.29683	0.281555
Os06g0261300	3.29608	0.537485
Os10g0113900	3.29418	0.973703
Os08g0203100	3.29338	1.28968
Os08g0198100	3.28985	0.0131594
Os04g0580800	3.28885	0.989724
Os03g0267300	3.28829	0.914596
Os01g0248300	3.28773	1.34268
Os08g0121400	3.28477	0.668432
Os02g0758000	3.28196	0.480156
Os05g0539800	3.27984	3.52058
Os06g0641932	3.2796	0.934162
Os03g0595300	3.27352	0.283791
Os09g0499450	3.26966	1.61915
Os10g0527400	3.26961	1.9367
Os06g0271600	3.26955	1.34183
Os12g0617400	3.26158	1.04659
Os12g0584700	3.25795	1.85946
Os06g0522300	3.25628	0.522516
Os11g0258400	3.25461	0.915149
Os05g0202800	3.25265	2.09861
Os01g0186000	3.25171	0.15001
Os08g0248100	3.25154	0.426413
Os02g0191600	3.2505	1.94337
Os08g0126000	3.25009	1.49145
Os03g0787350	3.24883	0.930355
Os02g0111600	3.24644	0.119539
Os01g0545100	3.24528	0.806341
Os02g0112100	3.24495	0.292759
Os11g0654800	3.2445	0.915556
Os10g0490900	3.24349	1.27959
Os01g0361500	3.23998	0.999135
Os03g0830200	3.23875	1.22831
Os01g0297950	3.23349	0.200758
Os04g0379400	3.23197	0.730424
Os03g0388800	3.2318	0.356474
Os01g0959900	3.23133	0.895158
Os06g0586150	3.22754	0.487131
Os06g0133100	3.22394	0.214669
Os05g0189300	3.22221	0.388759
Os05g0331532	3.22168	1.69172
Os04g0168400	3.21885	0.892422
Os09g0341500	3.21829	1.33828
Os05g0495900	3.21817	0.792737
Os08g0547300	3.21798	0.639247
Os01g0606000	3.21743	0.861463
Os03g0787400	3.21581	0.942007
Os02g0728850	3.21354	1.07593
Os11g0258500	3.21215	0.838522
Os12g0217400	3.21186	0.539417
Os04g0405300	3.21025	1.51813
Os01g0117025	3.20936	0.80405
Os09g0327000	3.20694	0.369652
Os09g0400400	3.20652	1.27306
Os04g0603300	3.20117	1.17189
Os07g0215500	3.20113	1.18063
Os05g0448300	3.19809	0.808951
Os11g0649400	3.19488	1.32636
Os01g0608101	3.19385	0.599765
Os08g0550600	3.19277	2.39662
Os07g0129300	3.19154	0.553411
Os03g0105401	3.18933	11.3786
Os01g0155000	3.18453	1.29063
Os03g0340100	3.18271	0.751343
Os03g0564600	3.17657	1.11191
Os02g0609000	3.17547	0.703847
Os03g0328300	3.17017	1.32048
Os10g0469600	3.16978	0.819292
Os05g0420300	3.16646	0.665425
Os04g0384200	3.16627	0.702851
Os07g0153150	3.16248	3.87326
Os09g0545700	3.16163	4.70993
Os09g0513200	3.16017	0.978829
Os07g0526600	3.15889	1.89837
Os01g0566000	3.15861	1.06763
Os11g0666200	3.15706	0.880365
Os11g0692500	3.15532	0.702986
Os02g0581100	3.15322	0.904739
Os02g0264501	3.14421	1.61399
Os10g0531400	3.14374	0.306085
Os11g0227200	3.14336	3.93522
Os12g0171900	3.13861	0.406579
Os04g0445000	3.13855	0.338967
Os01g0635550	3.13821	1.5182
Os05g0380850	3.1368	0.449483
Os03g0342850	3.13562	0.480382
Os04g0541700	3.13358	0.130788
Os05g0401100	3.13158	1.11397
Os01g0111600	3.1306	2.49109
Os02g0594232	3.12617	1.69831
Os06g0663800	3.12564	0.698135
Os10g0497750	3.12435	0.560308
Os05g0541000	3.12292	0.262548
Os10g0447900	3.1229	1.92521
Os11g0577866	3.11776	0.120348
Os03g0439500	3.11395	0.627115
Os06g0718400	3.11375	0.292113
Os11g0147700	3.11336	2.31074
Os05g0120200	3.10677	1.03688
Os02g0305950	3.10637	0.756978
Os03g0217000	3.10448	2.00743
Os01g0931700	3.10269	0.40944
Os05g0244900	3.10212	0.45495
Os11g0618850	3.10081	0.560646
Os07g0671000	3.10045	1.11371
Os02g0834700	3.09862	3.33233
Os05g0128900	3.09558	1.76844
Os11g0645400	3.09115	0.447978
Os08g0242800	3.09074	0.940142
Os10g0464300	3.08812	1.15441
Os01g0587400	3.08796	0.572643
Os01g0605700	3.08749	0.770046
Os12g0570400	3.08229	0.980576
Os03g0830950	3.08102	1.19472
Os03g0421700	3.07937	0.0283784
Os12g0423142	3.07921	0.304588
Os01g0882500	3.07658	1.07548
Os04g0515900	3.07651	1.65119
Os11g0611600	3.07317	0.514336
Os07g0556200	3.06841	0.837075
Os08g0454000	3.06834	5.20181
Os11g0119900	3.06794	1.4994
Os07g0452100	3.06723	2.54743
Os01g0522100	3.06669	0.5615
Os01g0235100	3.06649	1.30362
Os05g0423701	3.06239	1.13022
Os03g0293100	3.06121	1.1398
Os11g0701500	3.05775	0.301333
Os10g0453900	3.05573	0.847261
Os07g0113101	3.05539	3.57573
Os02g0114800	3.05514	0.802282
Os03g0613100	3.05461	1.3642
Os10g0351414	3.05356	1.39175
Os10g0580400	3.05239	1.03031
Os01g0372100	3.0514	0.730287
Os07g0654500	3.05071	0.706746
Os06g0218600	3.05003	1.05563
Os10g0150400	3.04889	0.897262
Os03g0639400	3.04774	1.25601
Os05g0268500	3.0457	0.707228
Os08g0189850	3.04396	0.722034
Os07g0533300	3.0438	0.00908887
Os04g0116600	3.04234	2.45426
Os10g0558900	3.04138	4.62993
Os04g0384800	3.03958	2.43937
Os07g0214600	3.03951	1.32067
Os01g0773700	3.03757	1.03676
Os10g0341750	3.03534	0.846717
Os02g0744000	3.03487	0.515495
Os07g0618266	3.03477	1.55496
Os11g0528812	3.02598	0.635046
Os06g0727900	3.02521	0.728725
Os11g0669100	3.02517	0.669232
Os12g0605850	3.02435	0.118874
Os10g0442466	3.0185	3.48066
Os11g0225000	3.01735	0.866428
Os08g0550850	3.01707	0.405633
Os04g0449300	3.01649	3.97905
Os09g0568700	3.01638	0.583699
Os01g0827800	3.01564	0.614089
Os09g0331600	3.01062	0.10533
Os05g0153200	3.00979	0.293928
Os01g0913300	3.00742	0.137628
Os10g0390900	3.00711	0.595336
Os01g0932650	3.00553	1.44392
Os07g0529600	3.00419	0.134565
Os06g0721800	3.00293	0.372163
Os08g0364100	3.00199	0.370127
Os02g0249900	3.00155	0.770996
Os02g0825650	2.99847	1.58008
Os08g0474866	2.99702	1.11165
Os11g0238400	2.99668	0.0958957
Os03g0150200	2.9942	0.854343
Os03g0389100	2.99303	0.910931
Os08g0453200	2.99244	0.151678
Os11g0664100	2.99167	0.414959
Os07g0645300	2.98781	0.907145
Os03g0766100	2.98488	1.35641
Os08g0331800	2.98418	0.945342
Os06g0552900	2.98334	0.564386
Os10g0516100	2.982	0.606132
Os12g0117350	2.9816	0.372903
Os07g0418500	2.98115	0.897436
Os02g0677600	2.98045	1.08809
Os03g0400000	2.98035	1.38847
Os08g0330900	2.98029	1.00874
Os03g0279950	2.97938	1.01918
Os02g0249800	2.97916	0.756652
Os09g0442400	2.97865	1.43557
Os02g0580900	2.97753	0.818472
Os10g0196100	2.97736	1.33536
Os10g0577500	2.97502	0.853662
Os07g0243150	2.97441	0.83282
Os01g0892500	2.97392	0.0972991
Os04g0587200	2.97177	1.44307
Os06g0543601	2.97054	0.957293
Os03g0415500	2.9695	0.493444
Os01g0207700	2.96731	0.111091
Os06g0132400	2.96462	0.591379
Os09g0554300	2.96319	0.0583149
Os11g0564800	2.96274	6.45782
Os04g0167900	2.96132	1.09779
Os01g0947000	2.9588	0.672692
Os02g0637000	2.95801	1.24016
Os06g0239500	2.95527	0.798619
Os04g0378066	2.95244	0.668063
Os06g0707350	2.95015	0.717772
Os05g0277000	2.94981	0.294437
Os05g0477200	2.94791	1.28838
Os07g0204400	2.94356	0.704311
Os05g0296750	2.94165	1.26008
Os06g0610800	2.94126	1.30936
Os10g0330000	2.94125	0.574372
Os08g0347200	2.94096	1.59442
Os11g0676050	2.9406	2.92577
Os11g0687200	2.94015	2.58399
Os10g0513400	2.9362	0.496697
Os05g0424000	2.93588	0.666317
Os01g0652700	2.93582	0.578971
Os02g0221100	2.93567	0.993096
Os06g0101600	2.93499	1.12403
Os10g0328700	2.93366	0.0842835
Os02g0612900	2.93183	0.718283
Os04g0659300	2.93119	0.105315
Os12g0569700	2.92665	0.51862
Os05g0109100	2.92604	0.221954
Os01g0157700	2.92603	0.708393
Os05g0215500	2.92507	0.658024
Os08g0229200	2.92473	0.800031
Os08g0323400	2.92434	0.995884
Os02g0174800	2.92417	0.304627
Os03g0369000	2.92322	1.37937
Os03g0251000	2.92109	1.03817
Os06g0697600	2.92047	1.12322
Os01g0522400	2.92023	1.45522
Os12g0530100	2.91963	0.43673
Os01g0252400	2.91957	1.40564
Os02g0678300	2.9189	3.33981
Os07g0206400	2.91814	1.10194
Os09g0490400	2.91299	1.17946
Os03g0363100	2.91231	0.91307
Os06g0112700	2.91055	0.0134872
Os07g0672700	2.91039	1.68192
Os03g0170200	2.90919	0.30275
Os05g0453401	2.90703	0.818456
Os02g0578400	2.90553	0.873581
Os07g0469200	2.90437	0.852787
Os01g0794900	2.8979	0.352478
Os01g0581300	2.89667	0.702109
Os07g0410700	2.89629	0.513653
Os01g0976300	2.89628	1.465
Os04g0533602	2.89379	0.245256
Os11g0198250	2.89139	0.6367
Os04g0382900	2.88785	0.7847
Os08g0477500	2.88756	0.931448
Os07g0106900	2.88749	1.40668
Os06g0284500	2.88513	0.761751
Os01g0884850	2.88479	0.999465
Os05g0458600	2.88266	1.11054
Os11g0167800	2.88259	0.987387
Os12g0448900	2.88118	1.26694
Os02g0641850	2.87844	0.505898
Os01g0111700	2.87241	0.165403
Os07g0290200	2.87209	0.3602
Os05g0176300	2.87042	1.22914
Os05g0258400	2.87007	0.929109
Os04g0516600	2.86805	1.0854
Os04g0570500	2.86661	1.42379
Os02g0535901	2.86502	0.713394
Os12g0161500	2.86466	0.0316482
Os11g0695800	2.86422	0.578679
Os03g0668033	2.86263	0.96829
Os04g0147600	2.86187	1.12183
Os03g0835150	2.85759	1.39789
Os06g0119300	2.85714	0.900256
Os01g0700100	2.85652	1.04439
Os05g0128100	2.85553	0.853296
Os07g0601600	2.85376	0.609901
Os07g0167700	2.85273	0.192592
Os02g0303500	2.8522	1.22289
Os01g0597800	2.85008	0.993257
Os11g0117300	2.84758	1.01085
Os03g0719000	2.8474	1.03191
Os01g0862200	2.84697	0.652664
Os07g0214300	2.84131	0.616629
Os09g0339000	2.83956	0.842421
Os01g0392600	2.83876	0.897734
Os05g0581300	2.83755	4.61497
Os08g0526200	2.83486	4.45666
Os12g0603300	2.83239	0.991434
Os11g0275200	2.83061	1.22766
Os02g0110900	2.82779	0.799653
Os04g0103900	2.82699	1.174
Os12g0630600	2.82573	0.249633
Os06g0497275	2.8243	0.335249
Os11g0133001	2.82376	0.787777
Os06g0119200	2.82372	0.569486
Os03g0371000	2.82312	1.42975
Os03g0674900	2.81994	0.773381
Os07g0117900	2.81815	0.668353
Os02g0300700	2.81783	1.0653
Os05g0146100	2.81544	1.03631
Os10g0148100	2.81311	1.13556
Os12g0608700	2.81252	0.325182
Os08g0544600	2.80976	5.7908
Os01g0197700	2.80798	1.14937
Os01g0716550	2.80609	0.465437
Os02g0786900	2.80257	0.588151
Os04g0182900	2.80129	0.271525
Os06g0314600	2.80121	0.700563
Os02g0626600	2.80102	0.1366
Os12g0291066	2.80097	1.06501
Os08g0476900	2.80064	0.146785
Os02g0676800	2.79946	1.10865
Os11g0703100	2.79111	0.349471
Os07g0638100	2.79016	0.0252473
Os11g0592350	2.79008	0.432898
Os12g0151000	2.79005	1.32518
Os06g0304300	2.78843	0.0175462
Os06g0196300	2.78826	0.448849
Os06g0708075	2.78703	0.415828
Os05g0231600	2.78625	0.655903
Os02g0585200	2.78613	0.145469
Os11g0259700	2.78461	0.351207
Os09g0535500	2.78403	0.346808
Os02g0202400	2.77814	0.37073
Os08g0404700	2.7779	0.885925
Os11g0656500	2.77327	0.423456
Os12g0256400	2.77295	0.480574
Os10g0148400	2.77034	0.771976
Os05g0574100	2.76933	0.785133
Os03g0195800	2.76912	1.19343
Os10g0116800	2.76846	0.682756
Os05g0518750	2.76644	1.04127
Os03g0150500	2.76466	0.658445
Os09g0482660	2.76022	0.506357
Os03g0820500	2.75991	1.71748
Os11g0569800	2.7586	6.25164
Os03g0789466	2.75557	0.52532
Os10g0196400	2.75475	0.926591
Os09g0530275	2.75265	0.0620609
Os12g0263050	2.7523	0.701226
Os03g0289400	2.75161	1.14422
Os11g0638200	2.75114	0.722271
Os11g0117500	2.75019	5.20778
Os04g0448300	2.74947	0.671462
Os08g0277200	2.74431	4.04609
Os01g0138800	2.7425	1.45795
Os01g0635200	2.73964	0.988001
Os09g0561482	2.73806	0.435677
Os06g0234300	2.73511	1.28702
Os07g0662800	2.73505	1.04546
Os11g0112200	2.73494	0.216403
Os07g0521300	2.73488	0.782996
Os06g0239200	2.73461	2.63456
Os02g0751600	2.73389	0.652971
[truncated: 8,351 more rows]

## Sheet: union_consensus
Supplementary Table 11. List of DEGs union comparison in the tolerant varieties using the susceptible varieties as reference
OS_GENEID	I64_v_Kharsu.log2FC	I64_v_KHO.log2FC	I64_v_MR.log2FC	I64_v_Nanhi.log2FC	I42_v_Kharsu.log2FC	I42_v_KHO.log2FC	I42_v_MR.log2FC	I42_v_Nanhi.log2FC	OS_GENEID	average	stdev	annotation	comment
Os08g0363000	13.0767	13.2611	13.1731	13.4207	13.0413	13.2399	13.1557	13.4514	Os08g0363000	13.2275	0.148445
Os09g0369400	11.9848	14.5391	12.924	13.1825	11.956	14.5047	12.9161	13.1977	Os09g0369400	13.1506	0.975214	OsTPP7	AG1 causal gene
Os09g0337300	14.7257	13.6647	14.9693	13.4885	11.261	10.2865	11.5207	10.1715	Os09g0337300	12.511	1.93464
Os09g0336600	12.3225	12.3648	12.3479	12.1707	12.2975	12.3405	12.3268	12.1909	Os09g0336600	12.2952	0.0734901
Os07g0220000	9.42011	8.57016	10.6653	12.4532	12.8229	11.7139	14.113	16.0151	Os07g0220000	11.9717	2.44203	PROLM	in AG2 region
Os08g0185701	11.2665	11.5837	11.9086	11.8235	11.2465	11.5383	11.893	11.8534	Os08g0185701	11.6392	0.2734
Os04g0325300	12.0044	13.7262	8.77889	12.0026	11.9801	13.6846	8.75887	12.0258	Os04g0325300	11.6202	1.91031
Os03g0667300	12.7635	9.62162	13.6813	9.24445	12.9014	9.5743	13.6524	9.24035	Os03g0667300	11.3349	2.07582
Os12g0109600	11.6856	10.6659	10.9526	11.4648	11.6683	10.631	10.9283	11.4929	Os12g0109600	11.1862	0.439725
Os08g0236900	10.8324	10.0212	11.4925	11.4486	10.8142	9.98893	11.4752	11.4769	Os08g0236900	10.9437	0.645269
Os07g0219250	10.5966	9.63896	10.1535	13.2579	10.5483	9.56264	10.127	13.2852	Os07g0219250	10.8963	1.51176
Os04g0429450	10.8054	11.5521	11.4673	11.4232	9.78847	10.5338	10.4512	10.4546	Os04g0429450	10.8095	0.624913
Os12g0564800	9.0748	11.3609	12.1068	10.6728	9.04824	11.3141	12.0933	10.6992	Os12g0564800	10.7963	1.19706
Os03g0643900	10.3533	12.1404	11.2401	8.49706	10.3341	12.1045	11.2169	8.52049	Os03g0643900	10.5508	1.42856
[truncated: 417 more rows]
