# Supplementary material for: Enriched-GWAS and Transcriptome Analysis to Refine and Characterize a Major QTL for Anaerobic Germination Tolerance in Rice
Source: Int J Mol Sci. 2021 Apr 24;22(9):4445. doi: 10.3390/ijms22094445 (PMC8123023; doi:10.3390/ijms22094445)
Supplement: Supplementary file 1 [file ijms-22-04445-s001.zip › Suppl_File12.xls]

## Sheet: Minimum 2
Supplementary File 12. Overview Wicoxon rank sum test
bin	name	elements	p-value
1.1	PS.lightreaction	70	0.0
1.3	PS.calvin cycle	35	1.2421527815220657E-6
11.2	lipid metabolism.FA desaturation	6	0.002090056840127037
10.7	cell wall.modification	65	0.004510414193574993
23.5	nucleotide metabolism.deoxynucleotide metabolism	7	0.005265333455818526
14	S-assimilation	7	0.006529943211672295
3.2.3	minor CHO metabolism.trehalose.potential TPS/TPP	7	0.006957846769503506
16.10	secondary metabolism.simple phenols	20	0.009058509570384565
16.1	secondary metabolism.isoprenoids	76	0.009321489555347355
16.8	secondary metabolism.flavonoids	58	0.010610649939030428
4	glycolysis	31	0.01782478117605573
10.6.2	cell wall.degradation.mannan-xylose-arabinose-fucose	22	0.01914808986193403
3.2.2	minor CHO metabolism.trehalose.TPP	12	0.022268902753697084
23.1.1	nucleotide metabolism.synthesis.pyrimidine	9	0.0281161123493543
23.1.2	nucleotide metabolism.synthesis.purine	14	0.03026472481467969
6	gluconeogenese/ glyoxylate cycle	9	0.031642903511247766
19	tetrapyrrole synthesis	31	0.03903620011529618
10.6.1	cell wall.degradation.cellulases and beta -1,4-glucanases	7	0.05612585409405058
11.9.3	lipid metabolism.lipid degradation.lysophospholipases	30	0.06846756203685289
23.4	nucleotide metabolism.phosphotransfer and pyrophosphatases	24	0.08266742240924137
10.3	cell wall.hemicellulose synthesis	24	0.09587374434949082
8.3	TCA / org. transformation.carbonic anhydrases	6	0.1136849419711654
13.1.5.1	amino acid metabolism.synthesis.serine-glycine-cysteine group.serine	5	0.11648526744628418
3.7	minor CHO metabolism.sugar kinases	1	0.1236832579599807
2.2.2	major CHO metabolism.degradation.starch	21	0.14235243086736982
23.2	nucleotide metabolism.degradation	30	0.14560413659243288
11.9.2	lipid metabolism.lipid degradation.lipases	43	0.16993809816100258
16.5	secondary metabolism.sulfur-containing	7	0.19248954173121063
13.1.5.3	amino acid metabolism.synthesis.serine-glycine-cysteine group.cysteine	23	0.22549212368261906
13.2.2.2	amino acid metabolism.degradation.glutamate family.proline	1	0.23275523554150515
13.2.1.2	amino acid metabolism.degradation.central amino acid metabolism.aspartate	1	0.2359918093696385
13.1.3.1	amino acid metabolism.synthesis.aspartate family.asparagine	1	0.23932851802613436
13.2.4.4	amino acid metabolism.degradation.branched-chain group.leucine	4	0.2519776053770708
7.3	OPP.electron transfer	1	0.26113700183753585
13.1.2.2	amino acid metabolism.synthesis.glutamate family.proline	2	0.2618093765427287
13.1.3.6.1	amino acid metabolism.synthesis.aspartate family.misc.homoserine	10	0.2630710520983294
3.5	minor CHO metabolism.others	29	0.26547121284352565
10.8	cell wall.pectin*esterases	23	0.2945715594472805
11.1	lipid metabolism.FA synthesis and FA elongation	77	0.304477839870262
13.1.4.5	amino acid metabolism.synthesis.branched chain group.isoleucine specific	2	0.3077478026377458
10.5.1	cell wall.cell wall proteins.AGPs	16	0.3255342943476247
10.5.4	cell wall.cell wall proteins.HRGP	6	0.33810096685419566
10.6.3	cell wall.degradation.pectate lyases and polygalacturonases	33	0.3513883635468386
11.3	lipid metabolism.Phospholipid synthesis	41	0.3613792736833406
3.1	minor CHO metabolism.raffinose family	7	0.3870981702624747
7.2	OPP.non-reductive PP	4	0.39386191304591134
10.2	cell wall.cellulose synthesis	34	0.40808874331256934
12.1	N-metabolism.nitrate metabolism	4	0.40861996314090665
13.1.6.2	amino acid metabolism.synthesis.aromatic aa.phenylalanine and tyrosine	5	0.41338861455979115
13.1.5.2	amino acid metabolism.synthesis.serine-glycine-cysteine group.glycine	3	0.41425047191648207
3.2.1	minor CHO metabolism.trehalose.TPS	5	0.4235286848228639
5	fermentation	20	0.43443060300376546
16.2	secondary metabolism.phenylpropanoids	82	0.43816436248755564
13.2.5.2	amino acid metabolism.degradation.serine-glycine-cysteine group.glycine	4	0.4381936553457215
13.2.4.1	amino acid metabolism.degradation.branched-chain group.shared	5	0.43923529421000396
2.2.1	major CHO metabolism.degradation.sucrose	27	0.4408955017587606
25	C1-metabolism	21	0.48144931728626683
13.1.3.4	amino acid metabolism.synthesis.aspartate family.methionine	14	0.4825577814121729
13.2.2.3	amino acid metabolism.degradation.glutamate family.arginine	3	0.48382534009688904
13.1.1.1	amino acid metabolism.synthesis.central amino acid metabolism.GABA	5	0.48758972958559466
13.2.3.5	amino acid metabolism.degradation.aspartate family.lysine	9	0.4974070916127946
8.2	TCA / org. transformation.other organic acid transformations	14	0.50298544344205
3.4	minor CHO metabolism.myo-inositol	7	0.5033067760037764
16.7	secondary metabolism.wax	10	0.5278971641057353
2.1.2	major CHO metabolism.synthesis.starch	16	0.5422704252284363
13.1.6.1	amino acid metabolism.synthesis.aromatic aa.chorismate	11	0.5436095982012958
13.1.2.3	amino acid metabolism.synthesis.glutamate family.arginine	3	0.5547757496184618
12.2	N-metabolism.ammonia metabolism	8	0.579790171447677
13.1.6.3	amino acid metabolism.synthesis.aromatic aa.phenylalanine	6	0.5920836724922653
16.4	secondary metabolism.N misc	14	0.592525394042849
13.2.3.1	amino acid metabolism.degradation.aspartate family.asparagine	3	0.5975133454222156
11.4	lipid metabolism.TAG synthesis	2	0.6082838665994341
13.1.1.3	amino acid metabolism.synthesis.central amino acid metabolism.alanine	7	0.6193094237214789
11.10	lipid metabolism.glycolipid synthesis	10	0.6214493058424524
1.2	PS.photorespiration	18	0.6320374876901189
10.5.3	cell wall.cell wall proteins.LRR	11	0.6619621789590053
11.9.4	lipid metabolism.lipid degradation.beta-oxidation	17	0.6737710531175841
13.1.1.2	amino acid metabolism.synthesis.central amino acid metabolism.aspartate	4	0.6740338546937146
23.3	nucleotide metabolism.salvage	31	0.6902084670956966
8.1	TCA / org. transformation.TCA	30	0.7039295162150503
13.2.3.4	amino acid metabolism.degradation.aspartate family.methionine	2	0.7121036510281491
13.1.3.2	amino acid metabolism.synthesis.aspartate family.threonine	2	0.7192524466629906
13.1.6.5	amino acid metabolism.synthesis.aromatic aa.tryptophan	22	0.7278354787327306
16.99	secondary metabolism.unspecified	3	0.7382852485806021
3.3	minor CHO metabolism.sugar alcohols	1	0.7502165130843261
9	mitochondrial electron transport / ATP synthesis	48	0.752982533800003
13.2.6.3	amino acid metabolism.degradation.aromatic aa.tryptophan	8	0.7562408037773745
21.2	redox.ascorbate and glutathione	50	0.7597063424378927
13.2.5.3	amino acid metabolism.degradation.serine-glycine-cysteine group.cysteine	2	0.767451093971983
13.1.7	amino acid metabolism.synthesis.histidine	4	0.777912466218836
13.1.6.4	amino acid metabolism.synthesis.aromatic aa.tyrosine	3	0.8256176102553131
10.5.5	cell wall.cell wall proteins.RGP	2	0.8258983630592852
10.1	cell wall.precursor synthesis	33	0.838020273320075
3.6	minor CHO metabolism.callose	4	0.8495792494053442
13.2.6.2	amino acid metabolism.degradation.aromatic aa.tyrosine	7	0.8534298928650474
13.2.4.3	amino acid metabolism.degradation.branched-chain group.valine	1	0.8603488138060612
13.1.4.1	amino acid metabolism.synthesis.branched chain group.common	10	0.8776872361008028
12.3	N-metabolism.N-degradation	3	0.9160285552709473
13.2.3.2	amino acid metabolism.degradation.aspartate family.threonine	2	0.9183366601947798
13.1.4.4	amino acid metabolism.synthesis.branched chain group.leucine specific	2	0.9265170698434435
11.8	lipid metabolism.''exotics'' (steroids, squalene etc)	61	0.9372112735418081
7.1	OPP.oxidative PP	11	0.9498218191370299
13.1.3.5	amino acid metabolism.synthesis.aspartate family.lysine	7	0.9888603892916041
2.1.1	major CHO metabolism.synthesis.sucrose	3	0.9945126376623232
1	PS	124	0.0
29.2.1.2	protein.synthesis.ribosomal protein.eukaryotic	200	1.5000778560900913E-21
28	DNA	394	1.0245217623472176E-18
29.2	protein.synthesis	398	1.4940572801365747E-14
29.2.1.2.2	protein.synthesis.ribosomal protein.eukaryotic.60S subunit	126	8.117741228993986E-14
28.1	DNA.synthesis/chromatin structure	250	1.184330353014236E-13
29.2.1	protein.synthesis.ribosomal protein	293	2.8179545425467908E-12
1.1.1	PS.lightreaction.photosystem II	32	1.5350831716887114E-11
29.2.1.2.1	protein.synthesis.ribosomal protein.eukaryotic.40S subunit	74	3.7823146063334785E-9
1.1.1.1	PS.lightreaction.photosystem II.LHC-II	12	8.630426551192727E-8
28.1.3	DNA.synthesis/chromatin structure.histone	41	7.277622749323488E-7
30.2.99	signalling.receptor kinases.misc	205	9.865429535516057E-7
29.5.11.4	protein.degradation.ubiquitin.E3	415	6.198462623174805E-6
29.5.11.4.2	protein.degradation.ubiquitin.E3.RING	257	8.23091210944149E-6
1.1.1.2	PS.lightreaction.photosystem II.PSII polypeptide subunits	20	1.1805745536275225E-5
1.1.2	PS.lightreaction.photosystem I	9	1.271160195637222E-5
29.2.1.1.1	protein.synthesis.ribosomal protein.prokaryotic.chloroplast	42	6.879080757382638E-5
28.99	DNA.unspecified	84	6.891914291880272E-5
1.1.2.2	PS.lightreaction.photosystem I.PSI polypeptide subunits	7	8.249806276383609E-5
20.2	stress.abiotic	233	1.0191243804191785E-4
29.4.1.57	protein.postranslational modification.kinase.receptor like cytoplasmatic kinase VII	219	2.772385427456392E-4
29.4.1	protein.postranslational modification.kinase	225	3.2880553476211105E-4
33.1	development.storage proteins	28	4.7335520845703805E-4
26.12	misc.peroxidases	92	7.507189681430493E-4
23	nucleotide metabolism	119	9.582211691546421E-4
29.5.11	protein.degradation.ubiquitin	562	0.0011287511746413958
16.8.1	secondary metabolism.flavonoids.anthocyanins	11	0.0014511201286243917
27.3.11	RNA.regulation of transcription.C2H2 zinc finger family	60	0.00159370891777888
11.2.3	lipid metabolism.FA desaturation.omega 3 desaturase	6	0.002090056840127037
4.1.6	glycolysis.cytosolic branch.fructose-2,6-bisphosphatase (Fru2,6BisPase)	5	0.002143986126657618
10	cell wall	280	0.0022449362653615716
29.2.1.1.1.1	protein.synthesis.ribosomal protein.prokaryotic.chloroplast.30S subunit	10	0.0026078106105871246
29.4	protein.postranslational modification	641	0.0030223081593721
31.2	cell.division	42	0.0032882855355286255
29.2.1.1.1.2	protein.synthesis.ribosomal protein.prokaryotic.chloroplast.50S subunit	32	0.004038185840966602
16	secondary metabolism	268	0.004065407458178614
16.8.1.21	secondary metabolism.flavonoids.anthocyanins.anthocyanin 5-aromatic acyltransferase	10	0.004335171705497465
20.2.1	stress.abiotic.heat	105	0.004764364820456279
28.2	DNA.repair	62	0.005110499948926023
29.2.1.1.3	protein.synthesis.ribosomal protein.prokaryotic.unknown organellar	35	0.005372332390933398
34.7	transport.phosphate	19	0.005375224916682075
31	cell	519	0.005984089648915115
26.23	misc.rhodanese	10	0.006269022915461386
29.2.1.1.3.2	protein.synthesis.ribosomal protein.prokaryotic.unknown organellar.50S subunit	22	0.006739832578049767
29.5	protein.degradation	933	0.009611873419206995
26.2	misc.UDP glucosyl and glucoronyl transferases	200	0.010200043971328445
31.1	cell.organisation	266	0.012257099797535758
17.8	hormone metabolism.salicylic acid	18	0.012260603435660933
17.8.1	hormone metabolism.salicylic acid.synthesis-degradation	18	0.012260603435660933
1.3.4	PS.calvin cycle.GAP	3	0.012316504648854254
27.3.41	RNA.regulation of transcription.B3 transcription factor family	4	0.012834990026401047
1.3.6	PS.calvin cycle.aldolase	7	0.013195638650935981
16.1.2	secondary metabolism.isoprenoids.mevalonate pathway	17	0.01321576833254541
30.2	signalling.receptor kinases	487	0.013256084624011732
9.2	mitochondrial electron transport / ATP synthesis.NADH-DH.type II	5	0.013945501153652638
26.6	misc.O-methyl transferases	24	0.014253916209160855
27.3.8	RNA.regulation of transcription.C2C2(Zn) DOF zinc finger family	20	0.014631860707772448
17.2	hormone metabolism.auxin	103	0.014849728813787834
16.8.5	secondary metabolism.flavonoids.isoflavones	7	0.015363331583269193
16.8.5.1	secondary metabolism.flavonoids.isoflavones.isoflavone reductase	7	0.015363331583269193
27.1.20	RNA.processing.degradation dicer	3	0.015372503464224613
23.5.4	nucleotide metabolism.deoxynucleotide metabolism.ribonucleoside-diphosphate reductase	3	0.016125350500514092
34.99	transport.misc	178	0.016559474536143384
4.1	glycolysis.cytosolic branch	16	0.01763082406886961
29.1	protein.aa activation	66	0.01865107732275702
27.3.6	RNA.regulation of transcription.bHLH,Basic Helix-Loop-Helix family	76	0.018722333144986503
3.2	minor CHO metabolism.trehalose	21	0.020086965961700676
10.6	cell wall.degradation	61	0.022564517476093997
16.1.5	secondary metabolism.isoprenoids.terpenoids	16	0.02504233537711896
29.5.3	protein.degradation.cysteine protease	34	0.026348670138507835
27.3.62	RNA.regulation of transcription.Nucleosome/chromatin assembly factor group	7	0.0267812199796596
5.2	fermentation.PDC	6	0.027000949047198963
16.8.2	secondary metabolism.flavonoids.chalcones	13	0.0281114518318552
1.3.13	PS.calvin cycle.rubisco interacting	3	0.028564054540170858
27.1.19	RNA.processing.ribonucleases	31	0.029166094933188932
9.2.2	mitochondrial electron transport / ATP synthesis.NADH-DH.type II.external	3	0.03047043997406057
29.1.30	protein.aa activation.pseudouridylate synthase	9	0.032105635316799594
27.3.32	RNA.regulation of transcription.WRKY domain transcription factor family	69	0.03342617461238517
4.3	glycolysis.unclear/dually targeted	3	0.03343569500883146
31.3	cell.cycle	75	0.0338638614868725
24	Biodegradation of Xenobiotics	44	0.034991092335472374
29.5.11.5	protein.degradation.ubiquitin.ubiquitin protease	23	0.03574843415363434
29.2.1.2.2.13	protein.synthesis.ribosomal protein.eukaryotic.60S subunit.L13	5	0.03601333244317467
29.2.2	protein.synthesis.misc ribosomal protein	11	0.03624870051062697
27.3.99	RNA.regulation of transcription.unclassified	223	0.036265469816010754
17.5.2	hormone metabolism.ethylene.signal transduction	65	0.03638724439652696
30.4.1	signalling.phosphinositides.phosphatidylinositol-4-phosphate 5-kinase	14	0.03823222954149796
29.5.11.4.3.1	protein.degradation.ubiquitin.E3.SCF.SKP	6	0.03901191864840303
27.3.22	RNA.regulation of transcription.HB,Homeobox transcription factor family	56	0.03937470990742975
29.2.1.2.2.44	protein.synthesis.ribosomal protein.eukaryotic.60S subunit.L44	4	0.042010433505689636
1.1.4	PS.lightreaction.ATP synthase	3	0.042929765626942284
18.5.2	Co-factor and vitamine metabolism.folate & vitamine K.vitamine K	4	0.0442840951121124
23.1	nucleotide metabolism.synthesis	29	0.04597213994490906
27.3.46	RNA.regulation of transcription.DNA methyltransferases	5	0.046616632995045704
29.3.1	protein.targeting.nucleus	36	0.04666969973143884
1.1.3	PS.lightreaction.cytochrome b6/f	2	0.04676620185705005
17.2.3	hormone metabolism.auxin.induced-regulated-responsive-activated	80	0.04743542352752711
29.8	protein.assembly and cofactor ligation	12	0.0485882323961675
20	stress	713	0.04987118922540157
29.2.1.2.2.57	protein.synthesis.ribosomal protein.eukaryotic.60S subunit.L7A	6	0.050224733436681386
11.6	lipid metabolism.lipid transfer proteins etc	4	0.052703005232450216
29.5.11.4.5	protein.degradation.ubiquitin.E3.BTB/POZ Cullin3	27	0.05305141519026235
30.2.16	signalling.receptor kinases.Catharanthus roseus-like RLK1	9	0.05353421515642465
1.1.6	PS.lightreaction.NADH DH	3	0.054708824059921835
29.7.8	protein.glycosylation.alpha-1,6-mannosyl-glycoprotein-beta-1,2-N-acetylglucosaminyltransferase(GnTII)	3	0.05566349974871935
29.7.5	protein.glycosylation.alpha-1,3-mannosyl-glycoprotein-beta-1,2-N-acetylglucosaminyltransferase(GnTI)	4	0.05713260563654197
20.2.99	stress.abiotic.unspecified	44	0.057184072127858476
1.1.2.1	PS.lightreaction.photosystem I.LHC-I	2	0.058305193428449975
29.5.11.4.5.2	protein.degradation.ubiquitin.E3.BTB/POZ Cullin3.BTB/POZ	24	0.05836194243147608
27.3.18	RNA.regulation of transcription.E2F/DP transcription factor family	7	0.05899595326635846
29.5.9	protein.degradation.AAA type	42	0.05938527728231047
19.14	tetrapyrrole synthesis.protochlorophyllide reductase	2	0.06121419726985344
26.28	misc.GDSL-motif lipase	76	0.061490121222148364
26.13	misc.acid and other phosphatases	54	0.0615265109747174
1.1.5.3	PS.lightreaction.other electron carrier (ox/red).ferredoxin reductase	2	0.06467989875125602
11.9	lipid metabolism.lipid degradation	90	0.06877586938721003
27.3.3	RNA.regulation of transcription.AP2/EREBP, APETALA2/Ethylene-responsive element binding protein family	78	0.06926397731594269
9.2.1	mitochondrial electron transport / ATP synthesis.NADH-DH.type II.internal matrix	3	0.07057945876358067
18.5	Co-factor and vitamine metabolism.folate & vitamine K	5	0.07057980164307165
34.18	transport.unspecified anions	10	0.07330449995779068
13.1.5.3.1	amino acid metabolism.synthesis.serine-glycine-cysteine group.cysteine.OASTL	9	0.07446678767728332
27.3.50	RNA.regulation of transcription.General Transcription	20	0.07491756431627584
29.2.1.1.3.1.1	protein.synthesis.ribosomal protein.prokaryotic.unknown organellar.30S subunit.S1	2	0.0773717375356171
29.2.1.2.2.535	protein.synthesis.ribosomal protein.eukaryotic.60S subunit.L35A	4	0.07923414673680619
29.2.6	protein.synthesis.ribosomal RNA	5	0.08118381879390225
4.3.12	glycolysis.unclear/dually targeted.phosphoglycerate mutase	2	0.08229150885040369
29.2.1.2.1.11	protein.synthesis.ribosomal protein.eukaryotic.40S subunit.S11	3	0.08352451310653486
27.3.12	RNA.regulation of transcription.C3H zinc finger family	13	0.08636079445835154
18.2	Co-factor and vitamine metabolism.thiamine	7	0.08780805350315135
29.4.1.59	protein.postranslational modification.kinase.receptor like cytoplasmatic kinase IX	1	0.08847179932168281
1.1.40	PS.lightreaction.cyclic electron flow-chlororespiration	5	0.08878323298486213
17.5	hormone metabolism.ethylene	122	0.09114079762419713
19.40	tetrapyrrole synthesis.regulation	3	0.09161245552137531
23.1.1.10	nucleotide metabolism.synthesis.pyrimidine.CTP synthetase	3	0.09201277162892779
11.9.3.2	lipid metabolism.lipid degradation.lysophospholipases.carboxylesterase	6	0.09325260681649006
17.3.1.2.3	hormone metabolism.brassinosteroid.synthesis-degradation.sterols.CYP51	1	0.09626472754909754
10.1.20	cell wall.precursor synthesis.phosphomannose isomerase	2	0.09662649587106388
11.3.4	lipid metabolism.Phospholipid synthesis.CDP-diacylglycerol-inositol 3-phosphatidyltransferase	1	0.09733253634865124
27.3.37	RNA.regulation of transcription.AS2,Lateral Organ Boundaries Gene Family	19	0.0974559046623046
26.3.1	misc.gluco-, galacto- and mannosidases.alpha-galactosidase	6	0.09800122940424814
9.1.1	mitochondrial electron transport / ATP synthesis.NADH-DH.complex I	6	0.09869918428722595
34.6	transport.sulphate	9	0.10034809577000092
13.1.5.1.1	amino acid metabolism.synthesis.serine-glycine-cysteine group.serine.phosphoglycerate dehydrogenase	2	0.10197011919977417
17.7	hormone metabolism.jasmonate	24	0.10305370932167807
29.2.1.99.99	protein.synthesis.ribosomal protein.unknown.unknown	5	0.10397380772870846
21	redox	142	0.10539694543411304
29.2.1.2.2.30	protein.synthesis.ribosomal protein.eukaryotic.60S subunit.L30	3	0.10675894332597481
17.7.1.4	hormone metabolism.jasmonate.synthesis-degradation.allene oxidase cyclase	1	0.10831274420737311
29.2.1.2.1.18	protein.synthesis.ribosomal protein.eukaryotic.40S subunit.S18	4	0.10896617325973382
10.2.2	cell wall.cellulose synthesis.COBRA	4	0.10955410336508198
29.2.1.1.1.1.15	protein.synthesis.ribosomal protein.prokaryotic.chloroplast.30S subunit.S15	1	0.10990395847703849
14.2	S-assimilation.APR	1	0.11325877636436836
1.1.4.3	PS.lightreaction.ATP synthase.epsilon chain	1	0.11361038239846044
29.2.1.1.3.99	protein.synthesis.ribosomal protein.prokaryotic.unknown organellar.unknown	2	0.11547518953124258
29.2.1.2.2.11	protein.synthesis.ribosomal protein.eukaryotic.60S subunit.L11	4	0.11594937840443661
29.3.3	protein.targeting.chloroplast	31	0.11698262692471606
23.1.99	nucleotide metabolism.synthesis.unspecified	2	0.11816089875105451
1.3.1	PS.calvin cycle.rubisco large subunit	1	0.1183810516806596
11.9.3.5	lipid metabolism.lipid degradation.lysophospholipases.phosphoinositide phospholipase C	3	0.11873836694187334
21.5	redox.peroxiredoxin	7	0.12045202198094263
17.7.1	hormone metabolism.jasmonate.synthesis-degradation	23	0.12160883630912224
26.3.4	misc.gluco-, galacto- and mannosidases.endoglucanase	18	0.12192338035561466
29.2.1.2.1.29	protein.synthesis.ribosomal protein.eukaryotic.40S subunit.S29	3	0.12305389865812587
16.8.1.12	secondary metabolism.flavonoids.anthocyanins.anthocyanidin 3-O-glucosyltransferase	1	0.12368325795998081
16.1.2.2	secondary metabolism.isoprenoids.mevalonate pathway.HMG-CoA synthase	2	0.1239157759506394
17.3.1.2.4	hormone metabolism.brassinosteroid.synthesis-degradation.sterols.FACKEL	2	0.12441990475554807
30.2.3	signalling.receptor kinases.leucine rich repeat III	44	0.12502496067796587
27.3.63	RNA.regulation of transcription.PHD finger transcription factor	3	0.1268988285152246
29.2.1.1.2.1.7	protein.synthesis.ribosomal protein.prokaryotic.mitochondrion.30S subunit.S7	1	0.1277480230326944
23.4.99	nucleotide metabolism.phosphotransfer and pyrophosphatases.misc	7	0.12891064321934753
26.16	misc.myrosinases-lectin-jacalin	9	0.1295117163317288
29.5.11.20	protein.degradation.ubiquitin.proteasom	38	0.13030100298912836
26.11	misc.alcohol dehydrogenases	29	0.13071119776385598
26.11.1	misc.alcohol dehydrogenases	29	0.13071119776385598
30.4	signalling.phosphinositides	28	0.1335100404482485
27.3.26	RNA.regulation of transcription.MYB-related transcription factor family	21	0.13468969971976485
20.2.5	stress.abiotic.light	1	0.1362785784276468
29.5.11.4.6	protein.degradation.ubiquitin.E3.DCX	1	0.1362785784276468
29.2.1.1.1.2.6	protein.synthesis.ribosomal protein.prokaryotic.chloroplast.50S subunit.L6	2	0.13684519524398775
27.3.20	RNA.regulation of transcription.G2-like transcription factor family, GARP	29	0.13964925270679873
1.3.2	PS.calvin cycle.rubisco small subunit	4	0.13989239675472964
30.1	signalling.in sugar and nutrient physiology	34	0.1399696459471218
10.1.2	cell wall.precursor synthesis.UGE	4	0.14234678901606612
34.19.2	transport.Major Intrinsic Proteins.TIP	6	0.14265862168874843
29.1.19	protein.aa activation.arginine-tRNA ligase	2	0.14292652533724404
11.3.10	lipid metabolism.Phospholipid synthesis.(S)-coclaurine-N-methyltransferase	1	0.1429835004706394
29.2.1.2.2.37	protein.synthesis.ribosomal protein.eukaryotic.60S subunit.L37	3	0.14405985949076883
29.2.3	protein.synthesis.initiation	48	0.14425860649933925
17.6.1.12	hormone metabolism.gibberelin.synthesis-degradation.GA3 oxidase	1	0.14481669941112552
3.99	minor CHO metabolism.misc	1	0.1448639401946814
1.3.9	PS.calvin cycle.seduheptulose bisphosphatase	1	0.14519495632142676
30.2.2	signalling.receptor kinases.leucine rich repeat II	2	0.14619528444208324
26.4.1	misc.beta 1,3 glucan hydrolases.glucan endo-1,3-beta-glucosidase	48	0.14700056142864293
19.10	tetrapyrrole synthesis.magnesium chelatase	3	0.14751368221059824
20.1.7	stress.biotic.PR-proteins	273	0.14769172833460595
31.5.1	cell.cell death.plants	11	0.1479579731869709
27.3.31	RNA.regulation of transcription.TUB transcription factor family	1	0.14959946641200708
11.9.2.1	lipid metabolism.lipid degradation.lipases.triacylglycerol lipase	27	0.14980512162909032
7.2.4	OPP.non-reductive PP.ribose 5-phosphate isomerase	2	0.15000071549880944
27.1	RNA.processing	193	0.15123869610575236
20.2.4	stress.abiotic.touch/wounding	8	0.1517495260340489
10.5	cell wall.cell wall proteins	40	0.152528482086437
1.1.3.1	PS.lightreaction.cytochrome b6/f.iron sulfur subunit	1	0.15272309870717193
29.2.1.1.3.2.1185	protein.synthesis.ribosomal protein.prokaryotic.unknown organellar.50S subunit.L18/L5	1	0.15529739215573066
13.1.5	amino acid metabolism.synthesis.serine-glycine-cysteine group	31	0.1553542005622326
19.11	tetrapyrrole synthesis.magnesium protoporphyrin IX methyltransferase	1	0.15664697209626843
29.2.4	protein.synthesis.elongation	30	0.15733569684042298
3.1.2.1	minor CHO metabolism.raffinose family.raffinose synthases.known	1	0.1573502464167227
1.1.5.1	PS.lightreaction.other electron carrier (ox/red).plastocyanin	1	0.15775319034378765
33	development	510	0.15781760828089486
16.1.4.4	secondary metabolism.isoprenoids.carotenoids.lycopene epsilon cyclase	1	0.15916965119088622
29.2.1.2.1.25	protein.synthesis.ribosomal protein.eukaryotic.40S subunit.S25	3	0.15971921557820934
21.4	redox.glutaredoxins	26	0.16008286899742186
27.3.55	RNA.regulation of transcription.HDA	11	0.16015433103159724
10.3.2	cell wall.hemicellulose synthesis.glucuronoxylan	5	0.1604645372163549
27.3.23	RNA.regulation of transcription.HSF,Heat-shock transcription factor family	24	0.16297470516898982
29.2.1.2.2.80	protein.synthesis.ribosomal protein.eukaryotic.60S subunit.P0	5	0.16308452166847476
27.3	RNA.regulation of transcription	1493	0.16345697469229603
17.2.2	hormone metabolism.auxin.signal transduction	19	0.16371159406084962
11.2.4	lipid metabolism.FA desaturation.omega 6 desaturase	1	0.16394341431953116
23.5.5	nucleotide metabolism.deoxynucleotide metabolism.dUTP diphosphatase	1	0.16498398256727137
6.5	gluconeogenese/ glyoxylate cycle.pyruvate dikinase	2	0.16505656105430044
16.1.1	secondary metabolism.isoprenoids.non-mevalonate pathway	16	0.16567598828063707
29.5.5	protein.degradation.serine protease	76	0.16608999660317497
27.3.15	RNA.regulation of transcription.CCAAT box binding factor family, HAP3	3	0.16899534657153614
11.8.1.2	lipid metabolism.''exotics'' (steroids, squalene etc).sphingolipids.serine C-palmitoyltransferase	3	0.1694864452464148
11.9.4.5	lipid metabolism.lipid degradation.beta-oxidation.acyl-CoA thioesterase	2	0.1722545187944827
2.2.2.1	major CHO metabolism.degradation.starch.starch cleavage	14	0.17367379462355179
16.5.99	secondary metabolism.sulfur-containing.misc	2	0.1743975259639146
16.5.99.1	secondary metabolism.sulfur-containing.misc.alliinase	2	0.1743975259639146
18.4.2	Co-factor and vitamine metabolism.pantothenate.3-methyl-2-oxobutanoate hydroxymethyltransferase (KPHMT,PANB)	2	0.17543784716006827
29.1.1	protein.aa activation.tyrosine-tRNA ligase	3	0.17612650022623613
29.2.1.2.2.99	protein.synthesis.ribosomal protein.eukaryotic.60S subunit.unknown	3	0.17644294033962618
29.2.1.1.3.2.18	protein.synthesis.ribosomal protein.prokaryotic.unknown organellar.50S subunit.L18	2	0.17706531620931518
29.2.1.1.3.2.510	protein.synthesis.ribosomal protein.prokaryotic.unknown organellar.50S subunit.L10A	4	0.17840899020419565
29.2.1.2.2.510	protein.synthesis.ribosomal protein.eukaryotic.60S subunit.L10A	4	0.17840899020419565
29.2.2.50	protein.synthesis.misc ribosomal protein.BRIX	5	0.17918771667529126
34.19.1	transport.Major Intrinsic Proteins.PIP	11	0.1798778841354048
22.1.2	polyamine metabolism.synthesis.SAM decarboxylase	3	0.18075644347170797
29.2.1.2.1.53	protein.synthesis.ribosomal protein.eukaryotic.40S subunit.S3A	3	0.18312130824857417
9.5	mitochondrial electron transport / ATP synthesis.cytochrome c reductase	2	0.183727703663628
16.2.1.7	secondary metabolism.phenylpropanoids.lignin biosynthesis.CCR1	2	0.1858548661991999
11.10.1	lipid metabolism.glycolipid synthesis.MGDG synthase	2	0.1864601862419553
11.3.7	lipid metabolism.Phospholipid synthesis.cyclopropane-fatty-acyl-phospholipid synthase	2	0.18767519437864055
11.5.2	lipid metabolism.glyceral metabolism.Glycerol-3-phosphate dehydrogenase (NAD+)	4	0.18885942229874494
14.1	S-assimilation.ATPS	1	0.1914721715665856
13.1.6.5.5	amino acid metabolism.synthesis.aromatic aa.tryptophan.tryptophan synthase	5	0.1922552861697897
19.12	tetrapyrrole synthesis.magnesium-protoporphyrin IX monomethyl ester (oxidative) cyclase	1	0.19516884829055292
17.3.1.2	hormone metabolism.brassinosteroid.synthesis-degradation.sterols	10	0.1961191195508545
27.3.59	RNA.regulation of transcription.Methyl binding domain proteins	9	0.19620537010481498
2.2.1.1	major CHO metabolism.degradation.sucrose.fructokinase	4	0.19709271823011232
1.2.1	PS.photorespiration.phosphoglycolate phosphatase	1	0.19742374671832477
27.3.53	RNA.regulation of transcription.High mobility group (HMG) family	1	0.1979605833505088
29.2.1.1.3.2.17	protein.synthesis.ribosomal protein.prokaryotic.unknown organellar.50S subunit.L17	2	0.1995953191725064
29.2.1.2.1.31	protein.synthesis.ribosomal protein.eukaryotic.40S subunit.SA	3	0.20014658851281777
17.3.1	hormone metabolism.brassinosteroid.synthesis-degradation	12	0.2002723371798667
29.2.1.1.3.2.32	protein.synthesis.ribosomal protein.prokaryotic.unknown organellar.50S subunit.L32	2	0.2021128747715275
29.2.1.99.2.39	protein.synthesis.ribosomal protein.unknown.large subunit.L39	2	0.20215574377113904
18.8	Co-factor and vitamine metabolism.ubiquinone	2	0.20279957421677647
18.8.1	Co-factor and vitamine metabolism.ubiquinone.hexaprenyldihydroxybenzoate methyltransferase	2	0.20279957421677647
29.2.1.2.1.10	protein.synthesis.ribosomal protein.eukaryotic.40S subunit.S10	3	0.20396075544337194
14.15	S-assimilation.AKN	2	0.20439407285487193
29.2.1.1.1.1.10	protein.synthesis.ribosomal protein.prokaryotic.chloroplast.30S subunit.S10	1	0.2046083951578317
17.5.3	hormone metabolism.ethylene.induced-regulated-responsive-activated	16	0.20631162701006378
29.5.1	protein.degradation.subtilases	26	0.20780763528267765
30.2.11	signalling.receptor kinases.leucine rich repeat XI	94	0.20893407004596037
27.3.49	RNA.regulation of transcription.GeBP like	3	0.20900864171774836
1.1.5	PS.lightreaction.other electron carrier (ox/red)	15	0.20929872179803688
9.6	mitochondrial electron transport / ATP synthesis.cytochrome c	4	0.20988393798100735
1.1.30	PS.lightreaction.state transition	1	0.21066647172390485
4.2.14	glycolysis.plastid branch.pyruvate kinase (PK)	4	0.21160249539103218
29.2.1.99.2.18	protein.synthesis.ribosomal protein.unknown.large subunit.L18	1	0.2122324660152788
1.3.3	PS.calvin cycle.phosphoglycerate kinase	4	0.21446822385184205
30.2.19	signalling.receptor kinases.legume-lectin	10	0.21451618063930566
29.2.1.2.2.82	protein.synthesis.ribosomal protein.eukaryotic.60S subunit.P2	2	0.21554185116841879
18.3.1	Co-factor and vitamine metabolism.riboflavin.GTP cyclohydrolase II	2	0.2168020094611034
26.3	misc.gluco-, galacto- and mannosidases	74	0.2179324797486398
29.2.1.2.1.17	protein.synthesis.ribosomal protein.eukaryotic.40S subunit.S17	3	0.21800364714668835
16.1.3.1	secondary metabolism.isoprenoids.tocopherol biosynthesis.hydroxyphenylpyruvate dioxygenase	1	0.22005968048670788
4.1.16	glycolysis.cytosolic branch.phospho-enol-pyruvate carboxylase kinase (PPCK)	1	0.2200596804867079
4.3.16	glycolysis.unclear/dually targeted.phospho-enol-pyruvate carboxylase kinase (PEPCK)	1	0.2200596804867079
6.4	gluconeogenese/ glyoxylate cycle.PEPCK	1	0.22112522725130979
26.7	misc.oxidases - copper, flavone etc.	75	0.22116090022837848
29.2.1.2.2.6	protein.synthesis.ribosomal protein.eukaryotic.60S subunit.L6	3	0.22307355139423315
14.3	S-assimilation.sulfite redox	1	0.22382157445368234
13.2.4	amino acid metabolism.degradation.branched chain group	10	0.22399226873275646
29.2.1.2.2.83	protein.synthesis.ribosomal protein.eukaryotic.60S subunit.P3	2	0.22405848957231916
16.1.2.8	secondary metabolism.isoprenoids.mevalonate pathway.geranyl diphosphate synthase	2	0.2251223788426666
29.4.1.55	protein.postranslational modification.kinase.receptor like cytoplasmatic kinase V	1	0.2260480880922361
22.1.3	polyamine metabolism.synthesis.arginine decarboxylase	1	0.22637684515133794
31.4	cell.vesicle transport	115	0.22802181562204749
30.99	signalling.unspecified	7	0.22826654815130262
13.2.2	amino acid metabolism.degradation.glutamate family	4	0.22895146990910267
11.9.4.2	lipid metabolism.lipid degradation.beta-oxidation.acyl CoA DH	4	0.22964861302791267
29.2.5	protein.synthesis.release	7	0.23135831272489032
27.3.5	RNA.regulation of transcription.ARR	8	0.23279114330314554
29.2.1.99	protein.synthesis.ribosomal protein.unknown	14	0.2336697659510798
29.2.1.1.1.1.6	protein.synthesis.ribosomal protein.prokaryotic.chloroplast.30S subunit.S6	1	0.23565318836931093
13.2.1	amino acid metabolism.degradation.central amino acid metabolism	1	0.2359918093696385
29.2.1.1.1.2.17	protein.synthesis.ribosomal protein.prokaryotic.chloroplast.50S subunit.L17	1	0.23714569490200899
35	not assigned	6154	0.23745130093691333
35.2	not assigned.unknown	6154	0.23745130093691333
23.3.1.1	nucleotide metabolism.salvage.phosphoribosyltransferases.aprt	3	0.23839362241986062
11.9.2.2	lipid metabolism.lipid degradation.lipases.acylglycerol lipase	1	0.23994498218685778
27.3.29	RNA.regulation of transcription.TCP transcription factor family	7	0.24086368454671003
23.1.2.4	nucleotide metabolism.synthesis.purine.FGAR amidotransferase	2	0.2417588096075048
30.1.1	signalling.in sugar and nutrient physiology	26	0.24250804553763383
29.2.1.2.2.32	protein.synthesis.ribosomal protein.eukaryotic.60S subunit.L32	3	0.24251645737274327
27.3.21	RNA.regulation of transcription.GRAS transcription factor family	12	0.24313012202245643
16.1.1.1	secondary metabolism.isoprenoids.non-mevalonate pathway.DXS	3	0.24319512190553957
13.1.3	amino acid metabolism.synthesis.aspartate family	34	0.24341345912608103
23.2.1.4	nucleotide metabolism.degradation.pyrimidine.dihydropyrimidinase	1	0.2438059109672058
30	signalling	952	0.2444867800776791
30.2.8	signalling.receptor kinases.leucine rich repeat VIII-1	12	0.24599921838277106
30.2.8.2	signalling.receptor kinases.leucine rich repeat VIII-2	12	0.24599921838277106
18.5.2.4	Co-factor and vitamine metabolism.folate & vitamine K.o-Succinyl-BenzoylCoa Synthetase	1	0.2460316479720308
29.2.1.2.2.537	protein.synthesis.ribosomal protein.eukaryotic.60S subunit.L37A	2	0.24637066606136585
29.2.1.2.2.23	protein.synthesis.ribosomal protein.eukaryotic.60S subunit.L23	3	0.24794264703842603
27.3.9	RNA.regulation of transcription.C2C2(Zn) GATA transcription factor family	20	0.2482147251871358
11.5	lipid metabolism.glyceral metabolism	5	0.2484374957897277
13.1.2.3.31	amino acid metabolism.synthesis.glutamate family.arginine.aspartate racemase	1	0.248552583400119
29.2.1.1.1.1.13	protein.synthesis.ribosomal protein.prokaryotic.chloroplast.30S subunit.S13	1	0.24862286634453623
23.3.2.2	nucleotide metabolism.salvage.nucleoside kinases.uridine kinase	2	0.24864986056692082
29.2.1.2.1.4	protein.synthesis.ribosomal protein.eukaryotic.40S subunit.S4	3	0.2494445469095928
30.2.24	signalling.receptor kinases.S-locus glycoprotein like	141	0.24944539448555725
29.2.1.2.1.5	protein.synthesis.ribosomal protein.eukaryotic.40S subunit.S5	2	0.2513442026020432
13.1.3.6.1.1	amino acid metabolism.synthesis.aspartate family.misc.homoserine.aspartate kinase	7	0.25160408358152747
6.9	gluconeogenese/ glyoxylate cycle.isocitrate lyase	1	0.2527230793218045
29.2.1.2.1.24	protein.synthesis.ribosomal protein.eukaryotic.40S subunit.S24	3	0.2530832310665539
29.2.1.1.1.2.5	protein.synthesis.ribosomal protein.prokaryotic.chloroplast.50S subunit.L5	1	0.2542905901283621
13.1.3.6.1.3	amino acid metabolism.synthesis.aspartate family.misc.homoserine.homoserine dehydrogenase	2	0.2543112314220995
29.2.1.2.2.24	protein.synthesis.ribosomal protein.eukaryotic.60S subunit.L24	5	0.2544577902952395
29.2.1.1.1.1.530	protein.synthesis.ribosomal protein.prokaryotic.chloroplast.30S subunit.S30A	1	0.2599025818395595
29.2.1.1.3.1.16	protein.synthesis.ribosomal protein.prokaryotic.unknown organellar.30S subunit.S16	2	0.2615518538722825
12.4	N-metabolism.misc	7	0.2624809203574883
13.1.3.6	amino acid metabolism.synthesis.aspartate family.misc	10	0.2630710520983294
26.21	misc.protease inhibitor/seed storage/lipid transfer protein (LTP) family protein	21	0.26433082836725785
29.7.13	protein.glycosylation.alpha-1,4-fucosyltransferase(alpha-1,4-FucT)	2	0.26439424141032086
29.2.1.2.1.14	protein.synthesis.ribosomal protein.eukaryotic.40S subunit.S14	2	0.2649133184999161
18.5.2.7	Co-factor and vitamine metabolism.folate & vitamine K.DHNA Phytyltransferase	1	0.26508496600959175
27.3.24	RNA.regulation of transcription.MADS box transcription factor family	18	0.267364643080993
29.2.1.2.2.31	protein.synthesis.ribosomal protein.eukaryotic.60S subunit.L31	3	0.26779318486617343
1.2.4	PS.photorespiration.glycine cleavage	3	0.2695919334198291
17.7.1.5	hormone metabolism.jasmonate.synthesis-degradation.12-Oxo-PDA-reductase	10	0.2696474585226705
30.5	signalling.G-proteins	131	0.27063698255925034
2.2.2.10	major CHO metabolism.degradation.starch.laforin like phosphoglucan phosphatase (SEX4)	2	0.27172525074318493
29.2.1.1.1.2.4	protein.synthesis.ribosomal protein.prokaryotic.chloroplast.50S subunit.L4	1	0.27183066417057344
29.2.1.2.2.27	protein.synthesis.ribosomal protein.eukaryotic.60S subunit.L27	2	0.27188385237611745
3.2.4	minor CHO metabolism.trehalose.trehalase	1	0.2777054847852485
17.1.1.1.10	hormone metabolism.abscisic acid.synthesis-degradation.synthesis.9-cis-epoxycarotenoid dioxygenase	5	0.2788688260732658
29.2.1.99.2.34	protein.synthesis.ribosomal protein.unknown.large subunit.L34	1	0.279301831151888
11.1.12	lipid metabolism.FA synthesis and FA elongation.ACP protein	9	0.2805034586377344
29.2.1.2.2.36	protein.synthesis.ribosomal protein.eukaryotic.60S subunit.L36	2	0.283252408503364
8.1.3	TCA / org. transformation.TCA.aconitase	2	0.2832524085033641
29.2.1.1.1.2.15	protein.synthesis.ribosomal protein.prokaryotic.chloroplast.50S subunit.L15	1	0.2842053148413506
29.2.1.2.2.518	protein.synthesis.ribosomal protein.eukaryotic.60S subunit.L18A	3	0.2843247637558996
29.2.1.2.2.22	protein.synthesis.ribosomal protein.eukaryotic.60S subunit.L22	2	0.28439581794264474
34.1	transport.p- and v-ATPases	34	0.2860074713733578
29.2.1.2.2.15	protein.synthesis.ribosomal protein.eukaryotic.60S subunit.L15	2	0.2865275694564805
27.3.69	RNA.regulation of transcription.SET-domain transcriptional regulator family	26	0.2870660327991693
29.2.1.2.1.20	protein.synthesis.ribosomal protein.eukaryotic.40S subunit.S20	3	0.2888894152754146
29.2.1.2.1.7	protein.synthesis.ribosomal protein.eukaryotic.40S subunit.S7	3	0.2906025286573819
16.1.2.7	secondary metabolism.isoprenoids.mevalonate pathway.isopentenyl pyrophosphate:dimethyllallyl pyrophosphate isomerase	1	0.2914339795182566
29.2.1.2.2.29	protein.synthesis.ribosomal protein.eukaryotic.60S subunit.L29	2	0.2920983154809149
1.1.4.9	PS.lightreaction.ATP synthase.subunit B_ (ATPX)	1	0.29229708554100786
16.8.4	secondary metabolism.flavonoids.flavonols	17	0.29487530188521127
29.5.11.4.1	protein.degradation.ubiquitin.E3.HECT	7	0.29803218741045945
19.13	tetrapyrrole synthesis.divinyl chlorophyllide-a 8-vinyl-reductase	1	0.2995829858899848
29.5.11.4.4	protein.degradation.ubiquitin.E3.APC	1	0.30054217557250934
11.3.5	lipid metabolism.Phospholipid synthesis.diacylglycerol kinase	7	0.3012623087037609
34.1.1	transport.p- and v-ATPases.H+-transporting two-sector ATPase	13	0.3012834907574615
29.2.1.2.1.515	protein.synthesis.ribosomal protein.eukaryotic.40S subunit.S15A	3	0.30171882702455943
34.9	transport.metabolite transporters at the mitochondrial membrane	52	0.3018180446064349
29.2.1.2.1.2	protein.synthesis.ribosomal protein.eukaryotic.40S subunit.S2	2	0.30231927859252294
34.3	transport.amino acids	59	0.3024012717327387
29.2.1.1.1.2.29	protein.synthesis.ribosomal protein.prokaryotic.chloroplast.50S subunit.L29	1	0.3025470542221984
23.3.2	nucleotide metabolism.salvage.nucleoside kinases	5	0.3028432049432252
16.1.2.9	secondary metabolism.isoprenoids.mevalonate pathway.farnesyl pyrophosphate synthetase	3	0.30292477051746397
13.1.5.1.2	amino acid metabolism.synthesis.serine-glycine-cysteine group.serine.phosphoserine aminotransferase	1	0.30391544158529715
23.1.2.3	nucleotide metabolism.synthesis.purine.GAR transformylase	1	0.3058542711677034
10.1.30.2	ell wall.precursor synthesis.sugar kinases.arabinose-1-kinase	2	0.3071733599314903
9.1	mitochondrial electron transport / ATP synthesis.NADH-DH	14	0.3074877780077798
10.1.5	cell wall.precursor synthesis.UXS	5	0.3085620446036222
29.2.1.1.1.2.9	protein.synthesis.ribosomal protein.prokaryotic.chloroplast.50S subunit.L9	1	0.3091853702045291
29.2.1.2.2.35	protein.synthesis.ribosomal protein.eukaryotic.60S subunit.L35	1	0.3093484738729197
27.3.44	RNA.regulation of transcription.Chromatin Remodeling Factors	42	0.3142559721618617
4.2.3	glycolysis.plastid branch.glucose-6-phosphate isomerase	2	0.31446326992867957
23.1.1.2	nucleotide metabolism.synthesis.pyrimidine.aspartate transcarbamoylase	1	0.3150103648440919
8.2.9	TCA / org. transformation.other organic acid transformaitons.cyt MDH	2	0.3163911778382489
13.1.5.2.41	amino acid metabolism.synthesis.serine-glycine-cysteine group.glycine.sarcosine oxidase	2	0.3177981545140222
27.3.4	RNA.regulation of transcription.ARF, Auxin Response Factor family	16	0.3194131242102735
16.1.2.5	secondary metabolism.isoprenoids.mevalonate pathway.phosphomevalonate kinase	1	0.32032247125833335
34.13	transport.peptides and oligopeptides	68	0.3205895133324248
17.3.1.2.8	hormone metabolism.brassinosteroid.synthesis-degradation.sterols.DWF1	1	0.3218269918356227
29.2.1.2.2.17	protein.synthesis.ribosomal protein.eukaryotic.60S subunit.L17	2	0.32216210577809695
1.3.11	PS.calvin cycle.RPE	1	0.3228325640963252
21.6	redox.dismutases and catalases	9	0.3232683258031761
10.5.1.1	cell wall.cell wall proteins.AGPs.AGP	16	0.3255342943476247
29.2.1.2.1.21	protein.synthesis.ribosomal protein.eukaryotic.40S subunit.S21	1	0.32755229514371076
29.2.1.2.2.527	protein.synthesis.ribosomal protein.eukaryotic.60S subunit.L27A	3	0.3278139667795047
30.8	signalling.misc	4	0.3279399645935881
29.1.9	protein.aa activation.valine-tRNA ligase	3	0.3282544124992176
27.2	RNA.transcription	69	0.32848438637616234
18.5.2.10	2-phytyl-1,4-naphthoquinone methyltransferase.PHYLLO	1	0.3284846216897197
16.1.3.5	secondary metabolism.isoprenoids.tocopherol biosynthesis.tocopherol methyltransferase	1	0.32899388805005
26.17	misc.dynamin	12	0.3318320230273277
11.1.5	lipid metabolism.FA synthesis and FA elongation.beta hydroxyacyl ACP dehydratase	2	0.3326975713307624
29.2.1.2.1.16	protein.synthesis.ribosomal protein.eukaryotic.40S subunit.S16	2	0.3335450672490516
29.2.1.2.1.23	protein.synthesis.ribosomal protein.eukaryotic.40S subunit.S23	2	0.3350619140420667
29.2.1.2.2.7	protein.synthesis.ribosomal protein.eukaryotic.60S subunit.L7	3	0.3361982987993762
12.1.2	N-metabolism.nitrate metabolism.nitrite reductase	2	0.33664414109451446
29.2.1.1.3.1.15	protein.synthesis.ribosomal protein.prokaryotic.unknown organellar.30S subunit.S15	2	0.3381089165594164
29.2.1.1.1.2.12	protein.synthesis.ribosomal protein.prokaryotic.chloroplast.50S subunit.L12	3	0.3389901472749126
23.1.1.5	nucleotide metabolism.synthesis.pyrimidine.orotate phosphoribosyltransferase	2	0.33927142891684353
18	Co-factor and vitamine metabolism	52	0.3409579881795035
34.4	transport.nitrate	4	0.34115990842994126
29.2.1.1.1.1.20	protein.synthesis.ribosomal protein.prokaryotic.chloroplast.30S subunit.S20	1	0.3414566154998955
29.2.1.2.1.19	protein.synthesis.ribosomal protein.eukaryotic.40S subunit.S19	2	0.3430210114679054
7.1.1	OPP.oxidative PP.G6PD	3	0.3438106763454454
29.2.1.1.1.2.18	protein.synthesis.ribosomal protein.prokaryotic.chloroplast.50S subunit.L18	1	0.3446845325502921
29.2.1.1.1.2.10	protein.synthesis.ribosomal protein.prokaryotic.chloroplast.50S subunit.L10	1	0.34477204287001606
11.1.6	lipid metabolism.FA synthesis and FA elongation.enoyl ACP reductase	2	0.34537015189521214
17.3	hormone metabolism.brassinosteroid	18	0.3454270110760544
29.2.1.2.2.523	protein.synthesis.ribosomal protein.eukaryotic.60S subunit.L23A	2	0.3458660115908679
29.2.1.2.1.26	protein.synthesis.ribosomal protein.eukaryotic.40S subunit.S26	2	0.3478539837176693
29.2.1.1.3.2.30	protein.synthesis.ribosomal protein.prokaryotic.unknown organellar.50S subunit.L30	1	0.3490774025974067
26.9	misc.glutathione S transferases	55	0.3491099837125215
11.10.4	lipid metabolism.glycolipid synthesis.sulfolipid synthase	3	0.34979556422154934
29.2.1.1.2.1.11	protein.synthesis.ribosomal protein.prokaryotic.mitochondrion.30S subunit.S11	1	0.3503137500116879
29.2.1.2.1.8	protein.synthesis.ribosomal protein.eukaryotic.40S subunit.S8	2	0.35128774957407877
9.9	mitochondrial electron transport / ATP synthesis.F1-ATPase	9	0.3513393971925507
27.3.52	RNA.regulation of transcription.Global transcription factor group	12	0.35201359857662884
2.2.2.8	major CHO metabolism.degradation.starch.ISA3	1	0.35270596664223197
29.2.1.2.2.3	protein.synthesis.ribosomal protein.eukaryotic.60S subunit.L3	2	0.3537984764711875
13.1.1	amino acid metabolism.synthesis.central amino acid metabolism	16	0.35381625933218963
17.6.1.13	hormone metabolism.gibberelin.synthesis-degradation.GA2 oxidase	5	0.3549892878197639
23.1.2.9	nucleotide metabolism.synthesis.purine.AICAR transformylase	1	0.3571632167299745
25.8	C1-metabolism.tetrahydrofolate synthase	1	0.3577900505653814
14.5	S-assimilation.sulfite oxidase	2	0.36018838054375907
29.2.1.2.2.21	protein.synthesis.ribosomal protein.eukaryotic.60S subunit.L21	2	0.3617173621436399
26.4	misc.beta 1,3 glucan hydrolases	62	0.3634842221246022
29.2.1.2.2.18	protein.synthesis.ribosomal protein.eukaryotic.60S subunit.L18	3	0.36514974420948215
3.4.2	minor CHO metabolism.myo-inositol.InsP-Kinases	2	0.36575025791076365
13.1.1.1.1	amino acid metabolism.synthesis.central amino acid metabolism.GABA.Glutamate decarboxylase	2	0.36587874424829026
16.2.1.6	secondary metabolism.phenylpropanoids.lignin biosynthesis.CCoAOMT	2	0.3660072587492593
27.3.80	RNA.regulation of transcription.zf-HD	8	0.3665147717654708
13.1.5.3.2	amino acid metabolism.synthesis.serine-glycine-cysteine group.cysteine.SAT	5	0.3681793586064701
23.5.2	nucleotide metabolism.deoxynucleotide metabolism.pseudouridine synthase	1	0.3681869850225636
29.2.1.2.2.26	protein.synthesis.ribosomal protein.eukaryotic.60S subunit.L26	3	0.36861810865623323
16.1.3.3	secondary metabolism.isoprenoids.tocopherol biosynthesis.MPBQ/MSBQ methyltransferase	2	0.3689708621648511
29.2.1.1.1.2.31	protein.synthesis.ribosomal protein.prokaryotic.chloroplast.50S subunit.L31	1	0.3693740092326898
23.1.2.20	nucleotide metabolism.synthesis.purine.adenylosuccinate synthase	2	0.37006987365357163
29.1.3	protein.aa activation.threonine-tRNA ligase	1	0.3710215041794207
29.2.1.2.2.28	protein.synthesis.ribosomal protein.eukaryotic.60S subunit.L28	3	0.3714710553222016
27.3.27	RNA.regulation of transcription.NAC domain transcription factor family	12	0.3716293898562933
29.2.1.1.1.1.83	protein.synthesis.ribosomal protein.prokaryotic.chloroplast.30S subunit.PSRP3	1	0.37239789467158824
10.1.11	cell wall.precursor synthesis.UER	1	0.3729493357430441
23.3.1	nucleotide metabolism.salvage.phosphoribosyltransferases	8	0.37408945844279673
29.2.1.2.2.12	protein.synthesis.ribosomal protein.eukaryotic.60S subunit.L12	2	0.3746166086979386
1.2.4.1	PS.photorespiration.glycine cleavage.P subunit	1	0.37516015345156006
29.2.1.1.1.2.13	protein.synthesis.ribosomal protein.prokaryotic.chloroplast.50S subunit.L13	1	0.37562175769726336
2.2.1.3	major CHO metabolism.degradation.sucrose.invertases	12	0.3760432448440556
29.2.1.2.1.15	protein.synthesis.ribosomal protein.eukaryotic.40S subunit.S15	2	0.37611804238934876
29.2.1.2.2.141	protein.synthesis.ribosomal protein.eukaryotic.60S subunit.L4/L1	2	0.376510330788395
12.2.1	N-metabolism.ammonia metabolism.glutamate synthase	2	0.37755766674957547
17.7.1.3	hormone metabolism.jasmonate.synthesis-degradation.allene oxidase synthase	3	0.37834167912394334
34.22	transport.cyclic nucleotide or calcium regulated channels	7	0.3819271814876539
18.13	Co-factor and vitamine metabolism.isochorismatase	2	0.38196285658378226
27.3.68	RNA.regulation of transcription.PWWP domain protein	3	0.38199469373650663
9.8	mitochondrial electron transport / ATP synthesis.uncoupling protein	2	0.3821608384920197
34.23	transport.hormones	3	0.3833431343868666
34.23.1	transport.hormones.auxin	3	0.3833431343868666
1.1.4.7	PS.lightreaction.ATP synthase.delta chain	1	0.3838033108366137
23.1.3	nucleotide metabolism.synthesis.PRS-PP	4	0.38409566112807525
17.1.1	hormone metabolism.abscisic acid.synthesis-degradation	20	0.3870668779655196
26.26	misc.aminotransferases	3	0.39040190877544
26.26.1	misc.aminotransferases.aminotransferase class IV family protein	3	0.39040190877544
23.1.2.1	nucleotide metabolism.synthesis.purine.amidophosphoribosyltransferase	2	0.3910011678793703
1.3.8	PS.calvin cycle.transketolase	2	0.39193889917631475
29.5.11.2	protein.degradation.ubiquitin.E1	7	0.3937114483988993
17.3.3	hormone metabolism.brassinosteroid.induced-regulated-responsive-activated	1	0.39656465649179656
17.3.1.2.99	hormone metabolism.brassinosteroid.synthesis-degradation.sterols.other	1	0.39818960082930327
29.2.1.1.3.1.17	protein.synthesis.ribosomal protein.prokaryotic.unknown organellar.30S subunit.S17	1	0.39847677155448646
27.3.10	RNA.regulation of transcription.C2C2(Zn) YABBY family	5	0.39870799898953635
29.2.1.2.1.12	protein.synthesis.ribosomal protein.eukaryotic.40S subunit.S12	2	0.3996932102029787
23.1.2.31	nucleotide metabolism.synthesis.purine.GMP synthetase	1	0.4002024137806747
29.2.1.1.2.2	protein.synthesis.ribosomal protein.prokaryotic.mitochondrion.50S subunit	2	0.4003039378303727
10.1.12.2	cell wall.precursor synthesis.KDO pathway.KDO-8-Phosphate Synthase	1	0.4007786246127491
2.2.1.3.1	major CHO metabolism.degradation.sucrose.invertases.neutral	6	0.4014905197136387
23.1.1.3	nucleotide metabolism.synthesis.pyrimidine.dihydroorotase	1	0.4025102448783133
11.3.3	lipid metabolism.Phospholipid synthesis.phosphatidate cytidylyltransferase	4	0.4033428316092918
27.3.14	RNA.regulation of transcription.CCAAT box binding factor family, HAP2	4	0.40590365956235
29.5.11.1	protein.degradation.ubiquitin.ubiquitin	18	0.40703315300541965
33.3	development.squamosa promoter binding like (SPL)	14	0.4076609093396101
30.2.6	signalling.receptor kinases.leucine rich repeat VI	1	0.40773195266996054
25.7	C1-metabolism.GTP cyclohydrolase I	1	0.4077319526699606
31.2.5	cell.division.plastid	3	0.40855955614950945
15	metal handling	41	0.40878239204524425
3	minor CHO metabolism	76	0.409699427098011
30.4.4	signalling.phosphinositides.phosphoinositide phospholipase C	2	0.4110477255178641
29.3.4.3	protein.targeting.secretory pathway.vacuole	18	0.4119209708762748
29.2.1.2.2.9	protein.synthesis.ribosomal protein.eukaryotic.60S subunit.L9	2	0.4131891729349133
10.8.2	cell wall.pectin*esterases.acetyl esterase	6	0.4136147369603709
29.2.1.1	protein.synthesis.ribosomal protein.prokaryotic	84	0.4143679265671847
20.1.3.1	stress.biotic.signalling.MLO-like	8	0.4145742946369856
10.1.30	cell wall.precursor synthesis.sugar kinases	4	0.41486915509655176
13.1.3.4.12	amino acid metabolism.synthesis.aspartate family.methionine.homocysteine S-methyltransferase	5	0.41566848863242484
6.2	gluconeogenese/ glyoxylate cycle.malate synthase	1	0.4165239780273833
10.2.1	cell wall.cellulose synthesis.cellulose synthase	15	0.4167529842886635
13.1.4.4.3	amino acid metabolism.synthesis.branched chain group.leucine specific.3-isopropylmalate dehydrogenase	1	0.4173108677336866
16.5.1.1.1.5	secondary metabolism.sulfur-containing.glucosinolates.synthesis.aliphatic.methylthioalkylmalate dehydrogenase (MAM-D)	1	0.4173108677336866
15.2	metal handling.binding, chelation and storage	32	0.41731998915823065
20.1.3	stress.biotic.signalling	9	0.42030929049183796
27.3.57	RNA.regulation of transcription.JUMONJI family	9	0.4208696653333512
13.2.5	amino acid metabolism.degradation.serine-glycine-cysteine group	6	0.421533608449685
13.1.6.1.10	amino acid metabolism.synthesis.aromatic aa.chorismate.dehydroquinate/shikimate dehydrogenase	2	0.42308250332539776
34.19.4	transport.Major Intrinsic Proteins.SIP	1	0.4232404143485352
29.2.1.2.1.3	protein.synthesis.ribosomal protein.eukaryotic.40S subunit.S3	2	0.42582376923523696
26.19	misc.plastocyanin-like	38	0.4278933010580428
16.1.2.4	secondary metabolism.isoprenoids.mevalonate pathway.mevalonate kinase	1	0.4297194127294441
3.1.2	minor CHO metabolism.raffinose family.raffinose synthases	5	0.4299954634208284
27.3.39	RNA.regulation of transcription.AtSR Transcription Factor family	7	0.4312723581068658
27.3.58	RNA.regulation of transcription.LUG	3	0.4314283490869974
20.2.3	stress.abiotic.drought/salt	43	0.43211501190724677
10.1.10	cell wall.precursor synthesis.UDP-glucose 4,6-dehydratase	2	0.4324023089541837
10.1.21	cell wall.precursor synthesis.phosphomannomutase	1	0.43282957731883515
30.2.22	signalling.receptor kinases.proline extensin like	6	0.43339229194305395
1.3.5	PS.calvin cycle.TPI	2	0.4338958891686353
23.4.10	nucleotide metabolism.phosphotransfer and pyrophosphatases.nucleoside diphosphate kinase	4	0.4345569526666326
34.15	transport.potassium	28	0.4346261457498959
27.3.73	RNA.regulation of transcription.Zn-finger(CCHC)	4	0.43642363225726416
17.4.2	hormone metabolism.cytokinin.signal transduction	3	0.4364861181646386
23.2.1.2	nucleotide metabolism.degradation.pyrimidine.uridine nucleosidase	2	0.43961296368386643
17.1.1.1	hormone metabolism.abscisic acid.synthesis-degradation.synthesis	6	0.44049133697191667
18.5.2.5	Co-factor and vitamine metabolism.folate & vitamine K.vitamine K.naphthoate synthase	1	0.44081412381229423
29.2.1.2.1.13	protein.synthesis.ribosomal protein.eukaryotic.40S subunit.S13	3	0.4409322248046482
27.3.47	RNA.regulation of transcription.ELF3	2	0.4409770958652266
29.2.1.2.2.513	protein.synthesis.ribosomal protein.eukaryotic.60S subunit.L13A	3	0.4426355828989897
18.3.2	Co-factor and vitamine metabolism.riboflavin.riboflavin synthase	1	0.4428488394839523
17.1.3	hormone metabolism.abscisic acid.induced-regulated-responsive-activated	15	0.4444232444540206
33.99	development.unspecified	443	0.444574795601814
34.8	transport.metabolite transporters at the envelope membrane	24	0.44488416269713865
27.3.2	RNA.regulation of transcription.Alfin-like	5	0.44570186363201847
29.2.1.2.1.6	protein.synthesis.ribosomal protein.eukaryotic.40S subunit.S6	2	0.4466749571350398
26.27	misc.calcineurin-like phosphoesterase family protein	3	0.4477089892339403
18.7	Co-factor and vitamine metabolism.iron-sulphur clusters	9	0.44807430265571035
17.1.2	hormone metabolism.abscisic acid.signal transduction	6	0.44962600940978653
20.1.5	stress.biotic.regulation of transcription	1	0.4498069001893472
29.1.20	protein.aa activation.phenylalanine-tRNA ligase	3	0.45019866136538095
29.1.5	protein.aa activation.isoleucine-tRNA ligase	2	0.452779140510606
23.3.2.3	nucleotide metabolism.salvage.nucleoside kinases.thymidine kinase	1	0.45279305543096243
29.2.1.1.1.2.28	protein.synthesis.ribosomal protein.prokaryotic.chloroplast.50S subunit.L28	1	0.45734508149124653
8.1.5	TCA / org. transformation.TCA.2-oxoglutarate dehydrogenase	2	0.45878316276109565
29.2.1.1.2.2.37	protein.synthesis.ribosomal protein.prokaryotic.mitochondrion.50S subunit.L37	1	0.4591106772335342
29.2.1.1.3.2.4	protein.synthesis.ribosomal protein.prokaryotic.unknown organellar.50S subunit.L4	2	0.4595184012046363
16.2.1.3	secondary metabolism.phenylpropanoids.lignin biosynthesis.4CL	5	0.4634111984497044
10.8.1	cell wall.pectin*esterases.PME	17	0.4634662927140507
27.3.40	RNA.regulation of transcription.Aux/IAA family	23	0.4636090406750461
30.2.12	signalling.receptor kinases.leucine rich repeat XII	18	0.4637173679383458
29.2.1.2.2.10	protein.synthesis.ribosomal protein.eukaryotic.60S subunit.L10	2	0.4648315520900202
18.4	Co-factor and vitamine metabolism.pantothenate	5	0.4669244258057961
1.2.4.4	PS.photorespiration.glycine cleavage.H protein	2	0.46846689807478725
29.2.1.2.1.9	protein.synthesis.ribosomal protein.eukaryotic.40S subunit.S9	4	0.46864604180707276
29.1.18	protein.aa activation.glutamine-tRNA ligase	2	0.4698062736690346
34.1.1.4	transport.p- and v-ATPases.H+-transporting two-sector ATPase.subunit E	2	0.46995522370020915
18.2.1	Co-factor and vitamine metabolism.thiamine.thiamine diphosphokinase	2	0.4701786976622375
24.2	Biodegradation of Xenobiotics.lactoylglutathione lyase	7	0.47035352004727105
16.5.1	secondary metabolism.sulfur-containing.glucosinolates	4	0.47080488533974973
27.3.17	RNA.regulation of transcription.CPP(Zn),CPP1-related transcription factor family	7	0.47142976062984493
29.2.1.2.2.14	protein.synthesis.ribosomal protein.eukaryotic.60S subunit.L14	1	0.47168174567370913
10.1.12.4	cell wall.precursor synthesis.KDO pathway.CMP-KDO Synthetase	1	0.4758078319998329
29.2.1.2.2.38	protein.synthesis.ribosomal protein.eukaryotic.60S subunit.L38	1	0.47761255692005394
31.5	cell.cell death	21	0.4779375606455356
17.3.1.2.7	hormone metabolism.brassinosteroid.synthesis-degradation.sterols.DWF5	1	0.4783567658565479
29.5.2	protein.degradation.autophagy	16	0.4834750746597136
29.2.1.1.2	protein.synthesis.ribosomal protein.prokaryotic.mitochondrion	7	0.4845714659220899
29.2.1.2.2.19	protein.synthesis.ribosomal protein.eukaryotic.60S subunit.L19	2	0.4877133211800483
10.1.30.3	cell wall.precursor synthesis.sugar kinases.glucuronic acid kinase	1	0.4899187707415986
29.5.11.4.3	protein.degradation.ubiquitin.E3.SCF	124	0.49025626061988103
34.2	transport.sugars	58	0.49090891691390026
11.9.4.3	lipid metabolism.lipid degradation.beta-oxidation.enoyl CoA hydratase	3	0.4913333903079433
19.4	tetrapyrrole synthesis.ALA dehydratase	1	0.49283258908940875
1.3.7	PS.calvin cycle.FBPase	3	0.49289240269989
13.1.4.4.1	amino acid metabolism.synthesis.branched chain group.leucine specific.2-isopropylmalate synthase	1	0.49608102631420836
11.10.2	lipid metabolism.glycolipid synthesis.DGDG synthase	4	0.49887369029832196
29.3.4.99	protein.targeting.secretory pathway.unspecified	35	0.5003930319612113
11.1.13	lipid metabolism.FA synthesis and FA elongation.acyl-CoA binding protein	8	0.502128436133623
29.2.1.2.1.28	protein.synthesis.ribosomal protein.eukaryotic.40S subunit.S28	1	0.5032676106529258
29.2.1.2.2.81	protein.synthesis.ribosomal protein.eukaryotic.60S subunit.P1	1	0.5117209556620336
29.2.1.1.2.1.29	protein.synthesis.ribosomal protein.prokaryotic.mitochondrion.30S subunit.S29	1	0.5122724251488767
21.2.1.4	redox.ascorbate and glutathione.ascorbate.L-galactose dehydrogenase	1	0.5126034555446337
23.5.3	nucleotide metabolism.deoxynucleotide metabolism.cytosine deaminase	2	0.5126712937592345
21.5.1	redox.peroxiredoxin.BAS1	2	0.5135301639598762
26.3.2	misc.gluco-, galacto- and mannosidases.beta-galactosidase	9	0.5148037040799618
21.2.1.1	redox.ascorbate and glutathione.ascorbate.GME	2	0.5150154292894675
30.2.20	signalling.receptor kinases.wheat LRK10 like	2	0.5157197540465585
27.3.51	RNA.regulation of transcription.General Transcription, TBP-binding protein	1	0.5159198818887714
9.3	mitochondrial electron transport / ATP synthesis.electron transfer flavoprotein	2	0.5166596306314677
19.99	tetrapyrrole synthesis.unspecified	3	0.5230105677479556
27.3.48	RNA.regulation of transcription.FHA transcription factor	5	0.5243486930203385
17	hormone metabolism	353	0.525548179125839
23.2.1.5	nucleotide metabolism.degradation.pyrimidine.beta-ureidopropionase	1	0.52638296888459
25.4	C1-metabolism.5-formyltetrahydrofolate cyclo-ligase	1	0.5296326842419714
34.16	transport.ABC transporters and multidrug resistance systems	86	0.5303897731884348
29.3.5	protein.targeting.peroxisomes	9	0.5307492002743373
30.2.17	signalling.receptor kinases.DUF 26	14	0.530807000754177
16.2.1.10	secondary metabolism.phenylpropanoids.lignin biosynthesis.CAD	7	0.5314311250830643
13.1.6.1.7	amino acid metabolism.synthesis.aromatic aa.chorismate.chorismate synthase	1	0.5327799895009604
11.9.3.1	lipid metabolism.lipid degradation.lysophospholipases.phospholipase D	9	0.535178687461755
16.4.1	secondary metabolism.N misc.alkaloid-like	12	0.5367585730140719
29.1.15	protein.aa activation.proline-tRNA ligase	2	0.5380390776042396
11.1.1	lipid metabolism.FA synthesis and FA elongation.Acetyl CoA Carboxylation	2	0.5381990850903604
11.1.1.1	lipid metabolism.FA synthesis and FA elongation.Acetyl CoA Carboxylation.homomeric Enzyme	2	0.5381990850903604
10.1.1.1	cell wall.precursor synthesis.NDP sugar pyrophosphorylase.GDP mannose	1	0.5401225328106439
8.2.4	TCA / org. transformation.other organic acid transformaitons.IDH	1	0.5406894338219501
8.1.4	TCA / org. transformation.TCA.IDH	4	0.5431005589252833
13.1.3.4.1	amino acid metabolism.synthesis.aspartate family.methionine.cystathionine gamma-synthase	1	0.5476294840401357
29.2.1.1.3.2.15	protein.synthesis.ribosomal protein.prokaryotic.unknown organellar.50S subunit.L15	1	0.5495714154088346
29.1.6	protein.aa activation.lysine-tRNA ligase	1	0.5518603782505346
11.3.2	lipid metabolism.Phospholipid synthesis.choline kinase	4	0.5519454347440597
23.2.1.3	nucleotide metabolism.degradation.pyrimidine.dihydrouracil dehydrogenase	1	0.5526626201203224
11	lipid metabolism	300	0.5541866186679535
29.4.1.61	protein.postranslational modification.kinase.receptor like cytoplasmatic kinase X	1	0.5544984613746458
34.19.3	transport.Major Intrinsic Proteins.NIP	10	0.5550320124975721
2.2.2.1.2	major CHO metabolism.degradation.starch.starch cleavage.beta amylase	6	0.5566112654088733
34.1.1.3	transport.p- and v-ATPases.H+-transporting two-sector ATPase.subunit D	1	0.5578335073974099
29.2.1.1.1.1.9	protein.synthesis.ribosomal protein.prokaryotic.chloroplast.30S subunit.S9	2	0.5580602273142401
16.1.4.8	secondary metabolism.isoprenoids.carotenoids.carotenoid isomerase	1	0.558755234470504
29.5.11.4.5.1	protein.degradation.ubiquitin.E3.BTB/POZ Cullin3.Cullin3	2	0.5615681422449847
21.1	redox.thioredoxin	40	0.5619958120377979
1.1.5.4	PS.lightreaction.other electron carrier (ox/red).ferredoxin oxireductase	3	0.5621608829101656
29.2.1.1.3.2.20	protein.synthesis.ribosomal protein.prokaryotic.unknown organellar.50S subunit.L20	1	0.5625651598421579
27	RNA	1869	0.5650350624165843
17.3.2	hormone metabolism.brassinosteroid.signal transduction	5	0.5663629410153055
16.2.1.1	secondary metabolism.phenylpropanoids.lignin biosynthesis.PAL	8	0.5687639129396258
17.3.1.2.5	hormone metabolism.brassinosteroid.synthesis-degradation.sterols.HYD1	1	0.5699896553562617
19.5	tetrapyrrole synthesis.porphobilinogen deaminase	1	0.5710374607880915
29.3.4.2	protein.targeting.secretory pathway.golgi	6	0.572788169203893
13.1.3.6.1.2	amino acid metabolism.synthesis.aspartate family.misc.homoserine.aspartate semialdehyde dehydrogenase	2	0.5735576632750199
2.1	major CHO metabolism.synthesis	19	0.5741270029973802
16.5.1.3	secondary metabolism.sulfur-containing.glucosinolates.degradation	1	0.5743031503756457
16.5.1.3.2	secondary metabolism.sulfur-containing.glucosinolates.degradation.nitrilespecifier protein	1	0.5743031503756457
17.7.3	hormone metabolism.jasmonate.induced-regulated-responsive-activated	1	0.5743031503756457
13.2	amino acid metabolism.degradation	52	0.5745877876182464
7.1.2	OPP.oxidative PP.6-phosphogluconolactonase	3	0.5747088633727255
20.1.7.6	stress.biotic.PR-proteins.proteinase inhibitors	3	0.5753161038860966
20.1.7.6.1	stress.biotic.PR-proteins.proteinase inhibitors.trypsin inhibitor	3	0.5753161038860966
29.2.1.1.3.2.9	protein.synthesis.ribosomal protein.prokaryotic.unknown organellar.50S subunit.L9	1	0.5753547108585488
16.2.1	secondary metabolism.phenylpropanoids.lignin biosynthesis	26	0.5759704046709069
29.2.1.2.1.27	protein.synthesis.ribosomal protein.eukaryotic.40S subunit.S27	1	0.5779290154302843
11.9.3.4	lipid metabolism.lipid degradation.lysophospholipases.phospholipase A2	1	0.5786320378774739
29.2.1.2.2.8	protein.synthesis.ribosomal protein.eukaryotic.60S subunit.L8	1	0.5794527383038799
2.2.1.4	major CHO metabolism.degradation.sucrose.hexokinase	6	0.5794740624213732
29.3.2	protein.targeting.mitochondria	20	0.5801837416594892
10.1.4	cell wall.precursor synthesis.UGD	2	0.580925377013644
29.7.12	protein.glycosylation.beta-1,3-galactosyltransferase(beta-1,3-GalT)	3	0.5818121264263638
13.1.4	amino acid metabolism.synthesis.branched chain group	14	0.5819246459237123
17.3.2.2	hormone metabolism.brassinosteroid.signal transduction.BZR	2	0.5830029010457798
34.11	transport.NDP-sugars at the ER	6	0.5839836122147255
23.3.3	nucleotide metabolism.salvage.NUDIX hydrolases	14	0.5840943420071649
11.8.3	lipid metabolism.''exotics'' (steroids, squalene etc).UDP-glucose:sterol glucosyltransferase	2	0.5861673570328779
23.4.3	nucleotide metabolism.phosphotransfer and pyrophosphatases.uridylate kinase	6	0.5871114425114962
29.1.22	protein.aa activation.asparagine-tRNA ligase	1	0.587335509606549
22.1.4	polyamine metabolism.synthesis.agmatine deiminase	1	0.587925761137305
21.2.1	redox.ascorbate and glutathione.ascorbate	20	0.5881373795680851
16.1.3.4	secondary metabolism.isoprenoids.tocopherol biosynthesis.tocopherol cyclase	1	0.5887525737577736
17.5.1.1	hormone metabolism.ethylene.synthesis-degradation.1-aminocyclopropane-1-carboxylate synthase	2	0.5889218835101819
20.2.2	stress.abiotic.cold	14	0.5893295585419538
34.98	transport.membrane system unknown	4	0.5907943946268541
17.4.1	hormone metabolism.cytokinin.synthesis-degradation	7	0.5916717801629336
13.1.6.3.1	amino acid metabolism.synthesis.aromatic aa.phenylalanine.arogenate dehydratase / prephenate dehydratase	6	0.5920836724922653
30.7	signalling.14-3-3 proteins	6	0.5944558672713995
17.1.1.1.1	hormone metabolism.abscisic acid.synthesis-degradation.synthesis.zeaxanthin epoxidase	1	0.5947926331583053
30.6	signalling.MAP kinases	23	0.5948486123817956
34	transport	805	0.597461552755027
13.2.3.1.1	amino acid metabolism.degradation.aspartate family.asparagine.L-asparaginase	3	0.5975133454222156
9.1.1.5	mitochondrial electron transport / ATP synthesis.NADH-DH.complex I.carbonic anhydrase	2	0.5975575320922617
27.3.66	RNA.regulation of transcription.Psudo ARR transcription factor family	3	0.599094004234264
11.1.3	lipid metabolism.FA synthesis and FA elongation.ketoacyl ACP synthase	5	0.5993906679235602
13.1.6.1.1	amino acid metabolism.synthesis.aromatic aa.chorismate.3-deoxy-D-arabino-heptulosonate 7-phosphate synthase	3	0.5997130383561824
23.1.2.6	nucleotide metabolism.synthesis.purine.AIR carboxylase	1	0.6013379579925097
29.3	protein.targeting	177	0.6013755863204752
28.1.1	DNA.synthesis/chromatin structure.retrotransposon/transposase	21	0.6032294451153046
28.1.1.4	DNA.synthesis/chromatin structure.retrotransposon/transposase.hat-like transposase	21	0.6032294451153046
26.8	misc.nitrilases, *nitrile lyases, berberine bridge enzymes, reticuline oxidases, troponine reductases	46	0.6049863952534822
3.4.3	minor CHO metabolism.myo-inositol.InsP Synthases	1	0.6051610446710485
17.5.1	hormone metabolism.ethylene.synthesis-degradation	41	0.6066843839784947
29.2.1.1.1.1.5	protein.synthesis.ribosomal protein.prokaryotic.chloroplast.30S subunit.S5	1	0.6079155982195763
8.1.8	TCA / org. transformation.TCA.fumarase	1	0.6095950152649076
17.6.1.11	hormone metabolism.gibberelin.synthesis-degradation.GA20 oxidase	3	0.6104886361532624
23.4.2	nucleotide metabolism.phosphotransfer and pyrophosphatases.guanylate kinase	2	0.6110850047812563
16.5.1.1	secondary metabolism.sulfur-containing.glucosinolates.synthesis	3	0.6111823011100554
16.5.1.1.1	secondary metabolism.sulfur-containing.glucosinolates.synthesis.aliphatic	3	0.6111823011100554
6.1	gluconeogenese/ glyoxylate cycle.citrate synthase	1	0.6128396993333247
10.1.30.1	cell wall.precursor synthesis.sugar kinases.galacturonic acid kinase	1	0.6142842258788697
13.99	amino acid metabolism.misc	6	0.6161951885148038
2.2.2.1.1	major CHO metabolism.degradation.starch.starch cleavage.alpha amylase	1	0.6218924604891972
10.1.8	cell wall.precursor synthesis.GER	1	0.624922896924256
16.1.2.6	secondary metabolism.isoprenoids.mevalonate pathway.mevalonate diphosphate decarboxylase	2	0.6256047323812868
27.3.67	RNA.regulation of transcription.putative transcription regulator	119	0.6260571664497357
11.3.8	lipid metabolism.Phospholipid synthesis.phosphatidylserine decarboxylase	2	0.6290426325612593
4.1.8	glycolysis.cytosolic branch.glyceraldehyde 3-phosphate dehydrogenase (GAP-DH)	4	0.6319526193279217
23.4.1	nucleotide metabolism.phosphotransfer and pyrophosphatases.adenylate kinase	6	0.6366275996410277
29.2.1.1.3.2.25	protein.synthesis.ribosomal protein.prokaryotic.unknown organellar.50S subunit.L25	1	0.6372301143902918
10.1.12.1	cell wall.precursor synthesis.KDO pathway.arabinose-5-phosphate isomerase	1	0.6373524770972008
13.1.1.3.11	amino acid metabolism.synthesis.central amino acid metabolism.alanine.alanine-glyoxylate aminotransferase	2	0.6407046885161458
34.10	transport.nucleotides	15	0.6417346647105473
27.3.70	RNA.regulation of transcription.Silencing Group	2	0.6427005369300011
29.2.1.1.1.2.21	protein.synthesis.ribosomal protein.prokaryotic.chloroplast.50S subunit.L21	2	0.6446120261289765
23.2.1	nucleotide metabolism.degradation.pyrimidine	5	0.6446597425023294
26	misc	1173	0.6447789866503095
29.2.1.1.3.1	protein.synthesis.ribosomal protein.prokaryotic.unknown organellar.30S subunit	11	0.6449967170025129
6.3	gluconeogenesis.Malate DH	3	0.6456604138170416
26.24	misc.GCN5-related N-acetyltransferase	18	0.6457279919573824
34.21	transport.calcium	17	0.645796256124028
13.1.3.5.5	amino acid metabolism.synthesis.aspartate family.lysine.diaminopimelate decarboxylase	1	0.646434562561024
11.10.3	lipid metabolism.glycolipid synthesis.UDP-sulfoquinovose synthase	1	0.6471732858916097
13.1.4.1.4	amino acid metabolism.synthesis.branched chain group.common.branched-chain amino acid aminotransferase	3	0.6474373041155123
29.2.1.1.3.1.5	protein.synthesis.ribosomal protein.prokaryotic.unknown organellar.30S subunit.S5	1	0.6476659613549689
11.8.8	lipid metabolism.''exotics'' (steroids, squalene etc).squalene synthase	2	0.6478321026445222
16.4.3	secondary metabolism.N misc.cyanogenic glycosides	1	0.6486517752406735
16.1.1.3	secondary metabolism.isoprenoids.non-mevalonate pathway.CMS	1	0.6488983250281634
26.22	misc.short chain dehydrogenase/reductase (SDR)	48	0.6500096708709716
27.3.16	RNA.regulation of transcription.CCAAT box binding factor family, HAP5	4	0.6521446175835224
29.2.1.2.2.5	protein.synthesis.ribosomal protein.eukaryotic.60S subunit.L5	1	0.6528483393287737
29.2.1.1.2.2.29	protein.synthesis.ribosomal protein.prokaryotic.mitochondrion.50S subunit.L29	1	0.6533427790644892
17.2.1	hormone metabolism.auxin.synthesis-degradation	4	0.6540607215235472
1.2.7	PS.photorespiration.glycerate kinase	1	0.6548270110914407
16.2.1.4	secondary metabolism.phenylpropanoids.lignin biosynthesis.HCT	2	0.6560424118484693
5.10	fermentation.aldehyde dehydrogenase	13	0.6585316341617189
11.3.6	lipid metabolism.Phospholipid synthesis.choline-phosphate cytidylyltransferase	3	0.660361451851455
30.9	signalling.lipids	4	0.6603813741378355
29.2.1.1.2.51	protein.synthesis.ribosomal protein.prokaryotic.mitochondrion.L51/S25/CI-B8	1	0.6630145570827346
17.1	hormone metabolism.abscisic acid	41	0.6664460856380372
2.2.2.4	major CHO metabolism.degradation.starch.D enzyme	4	0.6697829604995285
10.1.7	cell wall.precursor synthesis.GMD	1	0.6703680002595804
23.1.1.4	nucleotide metabolism.synthesis.pyrimidine.dihydroorotate dehydrogenase	1	0.6704929099816069
2.2.1.99	major CHO metabolism.degradation.sucrose.misc	1	0.6717425076930037
10.1.1.2	cell wall.precursor synthesis.NDP sugar pyrophosphorylase.GDP fucose and fucokinase	1	0.6722426011517415
27.3.36	RNA.regulation of transcription.Argonaute	2	0.6730297011078443
29.7.4	protein.glycosylation.UDP-glucose glycoprotein glucosyltransferase	1	0.6732432230784297
30.11.1	signalling.light.COP9 signalosome	10	0.673759794787056
13.1.1.2.1	amino acid metabolism.synthesis.central amino acid metabolism.aspartate.aspartate aminotransferase	4	0.6740338546937146
13.1.3.4.13	amino acid metabolism.synthesis.aspartate family.methionine.methionine S-methyltransferase	1	0.6758726051043966
16.5.1.1.1.4	secondary metabolism.sulfur-containing.glucosinolates.synthesis.aliphatic.methylthioalkylmalate isomerase small subunit (MAM-IS)	1	0.676373889582896
1.2.5	PS.photorespiration.serine hydroxymethyltransferase	1	0.6766245856350719
17.6	hormone metabolism.gibberelin	17	0.676627786033627
11.1.7	lipid metabolism.FA synthesis and FA elongation.ACP thioesterase	5	0.676873143893499
11.1.9	lipid metabolism.FA synthesis and FA elongation.long chain fatty acid CoA ligase	7	0.6776664753274856
2.2.1.3.2	major CHO metabolism.degradation.sucrose.invertases.cell wall	6	0.6798057194495548
29.5.11.3	protein.degradation.ubiquitin.E2	29	0.6804307459673937
11.8.1	lipid metabolism.''exotics'' (steroids, squalene etc).sphingolipids	21	0.6806161425000805
8.1.6	TCA / org. transformation.TCA.succinyl-CoA ligase	1	0.681143220070695
16.1.2.3	secondary metabolism.isoprenoids.mevalonate pathway.HMG-CoA reductase	3	0.6813526758346738
9.99	mitochondrial electron transport / ATP synthesis.unspecified	1	0.681897444859577
16.1.1.2	secondary metabolism.isoprenoids.non-mevalonate pathway.DXR	1	0.6820231799220529
29.1.17	protein.aa activation.glutamate-tRNA ligase	3	0.6824415887314657
11.8.2	lipid metabolism.''exotics'' (steroids, squalene etc).methylsterol monooxygenase	3	0.6832405453826457
8.1.7	TCA / org. transformation.TCA.succinate dehydrogenase	1	0.6878164872254597
11.8.4	lipid metabolism.''exotics'' (steroids, squalene etc).3-beta hydroxysteroid dehydrogenase/isomerase	2	0.6904534454373737
10.1.9	cell wall.precursor synthesis.MUR4	3	0.6905199702999187
2.1.2.60	major CHO metabolism.synthesis.starch.ADP Glucose Phosphorylase	1	0.6913518672206864
3.8.3	minor CHO metabolism.galactose.galactose-1-phosphate uridyl transferases	1	0.6913518672206864
27.3.30	RNA.regulation of transcription.Trihelix, Triple-Helix transcription factor family	13	0.6916071318061467
13.1.3.5.3	amino acid metabolism.synthesis.aspartate family.lysine.LL-diaminopimelic acid aminotransferase	2	0.6917044337507869
11.9.4.4	lipid metabolism.lipid degradation.beta-oxidation.hydroxybutyryl CoA DH	1	0.6917310590350003
29.1.21	protein.aa activation.histidine-tRNA ligase	2	0.6921514194969642
34.12	transport.metal	67	0.6930056363590277
4.1.13	glycolysis.cytosolic branch.enolase	4	0.6943027233497729
2.2	major CHO metabolism.degradation	48	0.6945234389948831
7.1.3	OPP.oxidative PP.6-phosphogluconate dehydrogenase	5	0.6950772169155911
29	protein	2327	0.6955913534968381
13.1.7.1	amino acid metabolism.synthesis.histidine.ATP phosphoribosyl transferase	1	0.6964140886844221
12.2.2	N-metabolism.ammonia metabolism.glutamine synthase	4	0.6964560434269398
27.3.35	RNA.regulation of transcription.bZIP transcription factor family	56	0.699240817162337
34.19	transport.Major Intrinsic Proteins	26	0.7005152271173203
16.1.4	secondary metabolism.isoprenoids.carotenoids	10	0.7009618146676799
19.20	tetrapyrrole synthesis.ferrochelatase	2	0.7016525363952832
23.1.2.5	nucleotide metabolism.synthesis.purine.AIR synthase	1	0.7032695572947765
10.1.1.20	cell wall.precursor synthesis.NDP sugar pyrophosphorylase.multiple NDP-Sugars	1	0.7095112251955245
3.1.1	minor CHO metabolism.raffinose family.galactinol synthases	2	0.7112908205097273
3.1.1.2	minor CHO metabolism.raffinose family.galactinol synthases.putative	2	0.7112908205097273
29.2.1.1.3.2.28	protein.synthesis.ribosomal protein.prokaryotic.unknown organellar.50S subunit.L28	1	0.7115535748378856
16.1.4.21	secondary metabolism.isoprenoids.carotenoids.violaxanthin de-epoxidase	2	0.7127360788278545
27.3.60	RNA.regulation of transcription.NIN-like bZIP-related family	4	0.7137055288704248
30.1.2	signalling.in sugar and nutrient physiology.pyruvate dehydrogenase kinase	2	0.7143632279986749
13.1.7.4	amino acid metabolism.synthesis.histidine.N'-5'-phosphoribosyl-formimino-5-aminoimidazole-4-carboxamide ribonucleotide isomerase	1	0.7148768062283613
29.5.4	protein.degradation.aspartate protease	56	0.7173940629352081
29.2.1.99.2.23	protein.synthesis.ribosomal protein.unknown.large subunit.L23	1	0.7180773275719774
23.1.2.8	nucleotide metabolism.synthesis.purine.SAICAR lyase	1	0.7183335840014334
13.1.3.2.1	amino acid metabolism.synthesis.aspartate family.threonine.threonine synthase	2	0.7192524466629906
27.3.71	RNA.regulation of transcription.SNF7	12	0.7193038601913258
16.8.3	secondary metabolism.flavonoids.dihydroflavonols	10	0.719733587821592
17.6.1	hormone metabolism.gibberelin.synthesis-degradation	10	0.7204637331027572
26.10	misc.cytochrome P450	173	0.7209753130532568
2.2.1.5	major CHO metabolism.degradation.sucrose.Susy	4	0.7226750361721678
13.1.6.1.5	amino acid metabolism.synthesis.aromatic aa.chorismate.shikimate kinase	3	0.7232533770825152
29.2.1.1.3.1.6	protein.synthesis.ribosomal protein.prokaryotic.unknown organellar.30S subunit.S6	2	0.7234264263176862
13.2.6	amino acid metabolism.degradation.aromatic aa	15	0.7241125299423326
9.4	mitochondrial electron transport / ATP synthesis.alternative oxidase	3	0.7243660254422282
11.1.30	lipid metabolism.FA synthesis and FA elongation.pyruvate kinase	2	0.7246984092684787
29.3.4	protein.targeting.secretory pathway	74	0.7254468205784426
13.1.4.5.1	amino acid metabolism.synthesis.branched chain group.isoleucine specific.threonine ammonia-lyase	1	0.7270649826931075
29.2.1.1.1.2.11	protein.synthesis.ribosomal protein.prokaryotic.chloroplast.50S subunit.L11	2	0.7276086487297468
8.2.3	TCA / org. transformation.other organic acid transformaitons.aconitase	1	0.7278371241087642
16.5.1.1.1.3	secondary metabolism.sulfur-containing.glucosinolates.synthesis.aliphatic.methylthioalkylmalate isomerase large subunit (MAM-IL)	1	0.7278371241087642
13.1.3.5.2	amino acid metabolism.synthesis.aspartate family.lysine.dihydrodipicolinate reductase	3	0.7281533743786751
1.1.5.2	PS.lightreaction.other electron carrier (ox/red).ferredoxin	8	0.7285257212433405
24.3	Biodegradation of Xenobiotics.3-hydroxybutyryl-CoA dehydrogenase	1	0.7292534339812209
27.3.42	RNA.regulation of transcription.Bromodomain proteins	5	0.7305668026613192
20.1	stress.biotic	476	0.7310550922276473
29.2.1.1.3.2.35	protein.synthesis.ribosomal protein.prokaryotic.unknown organellar.50S subunit.L35	3	0.731872917274836
4.2	glycolysis.plastid branch	13	0.7319260444046688
29.2.1.1.1.2.22	protein.synthesis.ribosomal protein.prokaryotic.chloroplast.50S subunit.L22	1	0.7349278738865427
2.1.2.3	major CHO metabolism.synthesis.starch.starch branching	1	0.7382877891073155
29.5.7	protein.degradation.metalloprotease	27	0.7415247232116222
29.2.1.99.1	protein.synthesis.ribosomal protein.unknown.small subunit	4	0.7433186503974258
29.2.1.99.1.21	protein.synthesis.ribosomal protein.unknown.small subunit.S21	4	0.7433186503974258
11.9.4.9	lipid metabolism.lipid degradation.beta-oxidation.multifunctional	3	0.7437426179636875
12.2.99	N-metabolism.ammonia metabolism.unspecified	2	0.7437759105859507
29.1.11	protein.aa activation.serine-tRNA ligase	3	0.7438174666139888
10.1.1	cell wall.precursor synthesis.NDP sugar pyrophosphorylase	3	0.745539652323251
10.1.3	cell wall.precursor synthesis.AXS	1	0.7486571312583379
11.9.3.3	lipid metabolism.lipid degradation.lysophospholipases.glycerophosphodiester phosphodiesterase	7	0.7495902425873984
8.2.11	TCA / org. transformation.other organic acid transformaitons.atp-citrate lyase	3	0.7501133298817854
16.4.2	secondary metabolism.N misc.betaine	1	0.7503465077534329
16.4.2.1	secondary metabolism.N misc.betaine.betaine-aldehyde dehydrogenase	1	0.7503465077534329
13.1.6.5.4	amino acid metabolism.synthesis.aromatic aa.tryptophan.indole-3-glycerol phosphate synthase	3	0.7505636776686452
2.2.1.3.3	major CHO metabolism.degradation.sucrose.invertases.vacuolar	2	0.7514887202323752
30.4.2	signalling.phosphinositides.phosphatidylinositol 4-kinase	1	0.7516468437819788
11.8.10	lipid metabolism.'exotics' (steroids, squalene etc).phosphatidylcholinesterol O-acyltransferase	6	0.7517224324170864
17.3.1.2.6	hormone metabolism.brassinosteroid.synthesis-degradation.sterols.DWF7	1	0.7552915268327663
26.3.3	misc.gluco-, galacto- and mannosidases.alpha-mannosidase	2	0.7569209831640122
27.3.19	RNA.regulation of transcription.EIN3-like(EIL) transcription factor family	6	0.7575182106982814
27.3.34	RNA.regulation of transcription.Orphan family	5	0.7593958636456258
29.5.11.4.3.3	protein.degradation.ubiquitin.E3.SCF.cullin	4	0.7603598827061182
26.30	misc. other Ferredoxins and Rieske domain	5	0.7617313286509195
11.1.8	lipid metabolism.FA synthesis and FA elongation.acyl coa ligase	12	0.7631939720985279
29.1.10	protein.aa activation.methionine-tRNA ligase	3	0.7632828593657046
26.3.5	misc.gluco-, galacto- and mannosidases.glycosyl hydrolase family 5	4	0.7651946027086427
25.5	C1-metabolism.Methylenetetrahydrofolate dehydrogenase & Methenyltetrahydrofolate cyclohydrolase	1	0.7670431473732704
13.1.1.3.1	amino acid metabolism.synthesis.central amino acid metabolism.alanine.alanine aminotransferase	5	0.76980523248023
17.3.2.99	hormone metabolism.brassinosteroid.signal transduction.other	3	0.7703097749966084
18.4.5	Co-factor and vitamine metabolism.pantothenate.pantothenate kinase (PANK)	1	0.7703171474144894
27.3.1	RNA.regulation of transcription.ABI3/VP1-related B3-domain-containing transcription factor family	7	0.7712024339764088
21.2.1.5	redox.ascorbate and glutathione.ascorbate.L-Galactono-1,4-lactone dehydrogenase	1	0.7724146616499119
25.1	C1-metabolism.glycine hydroxymethyltransferase	4	0.7755478365640329
19.8	tetrapyrrole synthesis.coproporphyrinogen III oxidase	2	0.7756091783431773
29.2.1.1.1.2.3	protein.synthesis.ribosomal protein.prokaryotic.chloroplast.50S subunit.L3	2	0.7764449423164557
27.3.13	RNA.regulation of transcription.CCAAT box binding factor family, DR1	1	0.7767460244213871
13.1.4.1.1	amino acid metabolism.synthesis.branched chain group.common.acetolactate synthase	2	0.7770022621843702
13.1.7.2	amino acid metabolism.synthesis.histidine.bifunctional phosphoribosyl-ATP diphosphatase and phosphoribosyl-AMP cyclohydrolase	1	0.777928517104328
29.2.1.1.3.1.18	protein.synthesis.ribosomal protein.prokaryotic.unknown organellar.30S subunit.S18	1	0.777928517104328
29.3.4.1	protein.targeting.secretory pathway.ER	9	0.785168385817964
13	amino acid metabolism	205	0.7861814823371021
29.1.40	protein.aa activation.bifunctional aminoacyl-tRNA synthetase	1	0.7862202268299755
22.1.5	polyamine metabolism.synthesis.N-carbamoylputrescine amidohydrolase	1	0.7871430454128308
17.7.1.2	hormone metabolism.jasmonate.synthesis-degradation.lipoxygenase	9	0.7900486852444489
1.3.12	PS.calvin cycle.PRK	2	0.792652829236081
29.3.4.4	protein.targeting.secretory pathway.plasma membrane	7	0.7958418755499717
11.7	lipid metabolism.unassigned	3	0.7969200864914057
8.2.10	TCA / org. transformation.other organic acid transformaitons.malic	6	0.7973732789819348
21.99	redox.misc	6	0.7978595325939828
30.10	signalling.phosphorelay	3	0.8007417039605862
13.1.2	amino acid metabolism.synthesis.glutamate family	5	0.8008612855297571
17.3.1.1	hormone metabolism.brassinosteroid.synthesis-degradation.BRs	2	0.8052903255811384
17.3.1.1.1	hormone metabolism.brassinosteroid.synthesis-degradation.BRs.DET2	2	0.8052903255811384
26.5	misc.acyl transferases	4	0.8073717446374857
22.1.6	polyamine metabolism.synthesis.spermidine synthase	2	0.8075424295932501
4.1.12	glycolysis.cytosolic branch.phosphoglycerate mutase	2	0.808011819442749
27.3.64	RNA.regulation of transcription.PHOR1	13	0.8115453189964803
19.15	tetrapyrrole synthesis.chlorophyll synthase	1	0.8129658501737762
2.1.2.2	major CHO metabolism.synthesis.starch.starch synthase	5	0.8149937093734171
7.2.2	OPP.non-reductive PP.transaldolase	2	0.8151549605343765
26.18	misc.invertase/pectin methylesterase inhibitor family protein	12	0.8157657965424803
18.3	Co-factor and vitamine metabolism.riboflavin	6	0.8181876416911309
30.11	signalling.light	82	0.8191350350160002
11.8.7	lipid metabolism.''exotics'' (steroids, squalene etc).trans-2-enoyl-CoA reductase (NADPH)	2	0.8218420809604274
17.3.1.2.1	hormone metabolism.brassinosteroid.synthesis-degradation.sterols.SMT1	1	0.8229537756666907
17.6.3	hormone metabolism.gibberelin.induced-regulated-responsive-activated	7	0.8242151830093386
11.9.4.13	lipid metabolism.lipid degradation.beta-oxidation.acyl CoA reductase	4	0.8246751842771833
13.1.6.4.1	amino acid metabolism.synthesis.aromatic aa.tyrosine.arogenate dehydrogenase \& prephenate dehydrogenase	3	0.8256176102553131
13.1.6.4.2	amino acid metabolism.synthesis.aromatic aa.tyrosine.prephenate dehydrogenase	3	0.8256176102553131
27.1.1	RNA.processing.splicing	41	0.8269487194692144
2.1.1.1	major CHO metabolism.synthesis.sucrose.SPS	1	0.8288268482332803
16.1.1.6	secondary metabolism.isoprenoids.non-mevalonate pathway.HDS	1	0.8306975780773892
16.1.4.3	secondary metabolism.isoprenoids.carotenoids.zeta-carotene desaturase	1	0.8316333036274357
29.5.11.4.3.4	protein.degradation.ubiquitin.E3.SCF.RBX	1	0.8319006976845924
23.3.1.3	nucleotide metabolism.salvage.phosphoribosyltransferases.upp	5	0.8329530829578995
16.1.2.1	secondary metabolism.isoprenoids.mevalonate pathway.acetyl-CoA C-acyltransferase	2	0.8333626512317486
18.6	Co-factor and vitamine metabolism.biotin	2	0.8334572337356512
12.1.1	N-metabolism.nitrate metabolism.NR	2	0.8354440210498213
19.6	tetrapyrrole synthesis.uroporphyrinogen III synthase	1	0.835512409478931
34.18.1	transport.unspecified anions.arsenite-transporting ATPase	2	0.8400839225948065
13.1.6.5.1	amino acid metabolism.synthesis.aromatic aa.tryptophan.anthranilate synthase	4	0.8401877132756947
11.1.10	lipid metabolism.FA synthesis and FA elongation.beta ketoacyl CoA synthase	18	0.8414118700425828
10.1.12	cell wall.precursor synthesis.KDO pathway	3	0.8424558415658159
29.1.14	protein.aa activation.glycine-tRNA ligase	2	0.8440654149490909
3.4.4	minor CHO metabolism.myo-inositol.myo inositol oxygenases	1	0.8489187794666143
8.1.1	TCA / org. transformation.TCA.pyruvate DH	16	0.8493671555807008
4.2.2	glycolysis.plastid branch.phosphoglucomutase (PGM)	1	0.8498589113554078
23.2.2	nucleotide metabolism.degradation.purine	3	0.8499717888676986
29.7	protein.glycosylation	47	0.8502698368497168
25.2	C1-metabolism.formate-tetrahydrofolate ligase	1	0.8513366923873815
21.2.1.2	redox.ascorbate and glutathione.ascorbate.GDP-L-galactose-hexose-1-phosphate guanyltransferase	3	0.8518335383708368
34.14	transport.unspecified cations	32	0.8541194318753292
29.7.3	protein.glycosylation.mannosyl-oligosaccharide alpha-1,2-mannosidase	1	0.856580271217987
21.2.2	redox.ascorbate and glutathione.glutathione	13	0.8574919987487124
8.1.1.1	TCA / org. transformation.TCA.pyruvate DH.E1	8	0.8575822633881087
16.1.4.1	secondary metabolism.isoprenoids.carotenoids.phytoene synthase	3	0.8581229821120515
8.1.1.3	TCA / org. transformation.TCA.pyruvate DH.E3	4	0.8591941101956424
3.1.2.2	minor CHO metabolism.raffinose family.raffinose synthases.putative	4	0.8608772184458129
29.1.16	protein.aa activation.cysteine-tRNA ligase	1	0.8616954976319824
30.2.25	signalling.receptor kinases.wall associated kinase	7	0.864114962472903
31.3.1	cell.cycle.peptidylprolyl isomerase	23	0.8654851741834011
29.5.11.4.3.2	protein.degradation.ubiquitin.E3.SCF.FBOX	113	0.8665397202781011
18.11	Co-factor and vitamine metabolism.lipoic acid	2	0.8704195384815998
30.4.5	signalling.phosphinositides.inositol-1,3,4-trisphosphate 5/6-kinase	4	0.8709213968377317
8.1.2	TCA / org. transformation.TCA.CS	1	0.8716732023378915
23.1.2.2	nucleotide metabolism.synthesis.purine.GAR Synthetase	1	0.8738332880481361
13.1.1.1.2	amino acid metabolism.synthesis.central amino acid metabolism.GABA.GABA transaminase	3	0.8746259310877131
29.2.1.1.2.1.10	protein.synthesis.ribosomal protein.prokaryotic.mitochondrion.30S subunit.S10	1	0.874778622315061
27.3.25	RNA.regulation of transcription.MYB domain transcription factor family	154	0.877220088340505
29.2.1.1.1.2.19	protein.synthesis.ribosomal protein.prokaryotic.chloroplast.50S subunit.L19	2	0.8803531515018124
11.1.15	lipid metabolism.FA synthesis and FA elongation.ACP desaturase	5	0.8806028292945479
1.2.2	PS.photorespiration.glycolate oxydase	6	0.8816227035014146
3.8.2	minor CHO metabolism.galactose.alpha-galactosidases	4	0.8816626506301717
2.1.2.1	major CHO metabolism.synthesis.starch.AGPase	5	0.8821754292552948
19.7	tetrapyrrole synthesis.uroporphyrinogen decarboxylase	2	0.8824569619630045
2.1.1.2	major CHO metabolism.synthesis.sucrose.SPP	2	0.8851357367130132
29.1.12	protein.aa activation.aspartate-tRNA ligase	2	0.8852314317124771
4.2.4	glycolysis.plastid branch.phosphofructokinase (PFK)	6	0.8868710157118217
11.3.1	lipid metabolism.Phospholipid synthesis.1-acylglycerol-3-phosphate O-acyltransferase	2	0.8930839917474409
20.1.1	stress.biotic.respiratory burst	7	0.8948768801341004
19.3	tetrapyrrole synthesis.GSA	3	0.8950176346073683
29.2.1.1.1.2.27	protein.synthesis.ribosomal protein.prokaryotic.chloroplast.50S subunit.L27	2	0.8951925934241873
15.3	metal handling.regulation	6	0.8955553186132603
13.1.6.5.2	amino acid metabolism.synthesis.aromatic aa.tryptophan.anthranilate phosphoribosyltransferase	1	0.8969747563358321
27.1.2	RNA.processing.RNA helicase	28	0.8977969452864869
30.3	signalling.calcium	146	0.8990130411160852
8.1.9	TCA / org. transformation.TCA.malate DH	2	0.9048822721128352
13.1.5.1.3	amino acid metabolism.synthesis.serine-glycine-cysteine group.serine.phosphoserine phosphatase	2	0.9049782827976405
27.3.7	RNA.regulation of transcription.C2C2(Zn) CO-like, Constans-like zinc finger family	30	0.9064729614567932
29.6	protein.folding	53	0.9066721973831577
34.5	transport.ammonium	7	0.9082659548908547
13.2.3	amino acid metabolism.degradation.aspartate family	16	0.9095992129998227
13.1.6.2.1	amino acid metabolism.synthesis.aromatic aa.phenylalanine and tyrosine.chorismate mutase	3	0.9097498163711304
29.2.1.1.2.1	protein.synthesis.ribosomal protein.prokaryotic.mitochondrion.30S subunit	4	0.9108829462199693
25.9	C1-metabolism.dihydroneopterin aldolase	2	0.9110296982781022
13.1.2.3.2	amino acid metabolism.synthesis.glutamate family.arginine.acetylglutamate kinase	1	0.9129962067456112
19.9	tetrapyrrole synthesis.protoporphyrin IX oxidase	1	0.9144916374738901
34.20	transport.porins	2	0.9158361022816838
12.3.1	N-metabolism.N-degradation.glutamate dehydrogenase	3	0.9160285552709473
8	TCA / org. transformation	50	0.9198001348263509
21.3	redox.heme	4	0.9210828283654222
29.2.1.2.2.34	protein.synthesis.ribosomal protein.eukaryotic.60S subunit.L34	7	0.9211152740832093
13.2.3.4.1	amino acid metabolism.degradation.aspartate family.methionine.methionine gamma-lyase	1	0.9219732272236869
29.2.1.1.1.2.1	protein.synthesis.ribosomal protein.prokaryotic.chloroplast.50S subunit.L1	2	0.9229551793480608
3.4.5	minor CHO metabolism.myo-inositol.inositol phosphatase	3	0.9241200973408592
29.2.1.1.1.2.24	protein.synthesis.ribosomal protein.prokaryotic.chloroplast.50S subunit.L24	3	0.9243558951488846
13.1.6.5.3	amino acid metabolism.synthesis.aromatic aa.tryptophan.phosphoribosyanthranilate isomerase	1	0.9244232805667689
7	OPP	16	0.925723205297287
12	N-metabolism	22	0.9257823000176417
18.4.7	Co-factor and vitamine metabolism.pantothenate.phosphopantothenoylcysteine decarboxylase (PPCDC)	1	0.9294617278442535
18.4.8	Co-factor and vitamine metabolism.pantothenate.pantetheine-phosphate adenylyltransferase (PPAT)	1	0.9313689159842173
29.7.7	protein.glycosylation.mannosyl-oligosaccharide-1,3-1,6-alpha-mannosidase(GMII)	1	0.9330039628024969
29.1.4	protein.aa activation.leucine-tRNA ligase	3	0.9340290913409248
9.1.2	mitochondrial electron transport / ATP synthesis.NADH-DH.localisation not clear	8	0.9360451096627229
26.1	misc.misc2	29	0.9373119268883222
23.1.2.30	nucleotide metabolism.synthesis.purine.IMP dehydrogenase	1	0.9388651535916128
29.3.99	protein.targeting.unknown	6	0.9411484926227205
29.2.1.99.2	protein.synthesis.ribosomal protein.unknown.large subunit	5	0.9413072437173657
29.1.7	protein.aa activation.alanine-tRNA ligase	3	0.9426094676791796
17.3.1.2.2	hormone metabolism.brassinosteroid.synthesis-degradation.sterols.SMT2	1	0.9436383511726085
29.2.99	protein.synthesis.misc	2	0.9456977559277875
16.1.3	secondary metabolism.isoprenoids.tocopherol biosynthesis	12	0.9528805033199297
23.3.2.1	nucleotide metabolism.salvage.nucleoside kinases.adenosine kinase	2	0.9557350825243505
27.4	RNA.RNA binding	130	0.9560630825377232
8.2.99	TCA / org. transformation.other organic acid transformaitons.misc	1	0.9589253460648393
8.1.1.2	TCA / org. transformation.TCA.pyruvate DH.E2	4	0.95899058863258
23.1.1.1	nucleotide metabolism.synthesis.pyrimidine.carbamoyl phosphate synthetase	1	0.9611105678618582
11.5.1	lipid metabolism.glyceral metabolism.glycerol kinase	1	0.962339884584265
3.8	minor CHO metabolism.galactose	5	0.96456846211932
16.1.1.10	secondary metabolism.isoprenoids.non-mevalonate pathway.geranylgeranyl pyrophosphate synthase	5	0.9686627023304987
33.2	development.late embryogenesis abundant	25	0.9691526601804132
1.2.6	PS.photorespiration.hydroxypyruvate reductase	4	0.9692370127196548
26.14	misc.oxygenases	3	0.9705957440660309
13.1.6	amino acid metabolism.synthesis.aromatic aa	47	0.9711603356229467
27.3.81	RNA.regulation of transcription.S1FA	1	0.9717674052170173
16.1.3.2	secondary metabolism.isoprenoids.tocopherol biosynthesis.homogentisate phytyltransferase	2	0.9734129934633033
2	major CHO metabolism	67	0.9737243372510304
29.7.9	protein.glycosylation.beta-1,2-xylosyltransferase(beta-1,2-XylT)	1	0.9738174339164303
9.7	mitochondrial electron transport / ATP synthesis.cytochrome c oxidase	6	0.9767204853827338
24.1	Biodegradation of Xenobiotics.hydroxyacylglutathione hydrolase	2	0.9784389881111402
13.1	amino acid metabolism.synthesis	149	0.9803754239262166
29.4.1.56	protein.postranslational modification.kinase.receptor like cytoplasmatic kinase VI	2	0.9807589787660915
16.1.4.6	secondary metabolism.isoprenoids.carotenoids.carotenoid beta ring hydroxylase	2	0.9815323461197039
17.4	hormone metabolism.cytokinin	10	0.9820081991966854
16.1.1.5	secondary metabolism.isoprenoids.non-mevalonate pathway.MCS	1	0.9822925710111563
13.1.6.1.2	amino acid metabolism.synthesis.aromatic aa.chorismate.3-dehydroquinate synthase	1	0.9837964605587404
5.1	fermentation.LDH	2	0.9838525494144681
19.21	tetrapyrrole synthesis.heme oxygenase	2	0.9853994287058243
22	polyamine metabolism	8	0.9864609306978211
22.1	polyamine metabolism.synthesis	8	0.9864609306978211
34.2.1	transport.sugars.sucrose	2	0.9890734763413045
27.3.65	RNA.regulation of transcription.Polycomb Group (PcG)	7	0.9897907909203445
27.3.54	RNA.regulation of transcription.Histone acetyltransferases	6	0.9960916288376074
13.1.6.1.6	amino acid metabolism.synthesis.aromatic aa.chorismate.5-enolpyruvylshikimate-3-phosphate synthase	1	0.997743658865944
1.2.3	PS.photorespiration.aminotransferases peroxisomal	1	0.9989743893090669
13.1.5.2.3	amino acid metabolism.synthesis.serine-glycine-cysteine group.glycine.serine glyoxylate aminotransferase	1	0.9989743893090669

## Sheet: Minimum 2 1FC
bin	name	elements	p-value
1.1	PS.lightreaction	63	3.653077840226615E-12
1.3	PS.calvin cycle	26	3.824642359442354E-4
10.7	cell wall.modification	50	0.005113241955520045
4	glycolysis	15	0.005649370492127803
23.5	nucleotide metabolism.deoxynucleotide metabolism	6	0.02043678824222794
10.3	cell wall.hemicellulose synthesis	15	0.024383694473721195
14	S-assimilation	5	0.04052086369685865
16.8	secondary metabolism.flavonoids	39	0.04700136684445239
16.10	secondary metabolism.simple phenols	15	0.0483078933256329
11.2	lipid metabolism.FA desaturation	6	0.04926393965310549
3.2.2	minor CHO metabolism.trehalose.TPP	9	0.06386941158980286
8.3	TCA / org. transformation.carbonic anhydrases	3	0.07641745956595083
11.9.2	lipid metabolism.lipid degradation.lipases	18	0.08554722024181549
11.9.3	lipid metabolism.lipid degradation.lysophospholipases	15	0.11417300497298366
3.2.3	minor CHO metabolism.trehalose.potential TPS/TPP	5	0.1214252055487588
23.4	nucleotide metabolism.phosphotransfer and pyrophosphatases	5	0.14000808593202033
16.1	secondary metabolism.isoprenoids	39	0.15954026005976119
3.7	minor CHO metabolism.sugar kinases	1	0.17509278133020656
19	tetrapyrrole synthesis	13	0.17779501295629463
3.6	minor CHO metabolism.callose	1	0.179499539072137
6	gluconeogenese/ glyoxylate cycle	3	0.18724441622545074
3.1	minor CHO metabolism.raffinose family	4	0.2194433714700227
7.1	OPP.oxidative PP	2	0.2256846322266291
23.2	nucleotide metabolism.degradation	12	0.22839443248538002
10.5.1	cell wall.cell wall proteins.AGPs	5	0.24348853274719828
25	C1-metabolism	5	0.2580004799230169
12.2	N-metabolism.ammonia metabolism	2	0.26122254779773835
10.6.1	cell wall.degradation.cellulases and beta -1,4-glucanases	5	0.2762588592579812
11.9.4	lipid metabolism.lipid degradation.beta-oxidation	9	0.28409669626987344
13.1.5.3	amino acid metabolism.synthesis.serine-glycine-cysteine group.cysteine	10	0.3232966052525963
13.1.6.2	amino acid metabolism.synthesis.aromatic aa.phenylalanine and tyrosine	2	0.3275141636347665
2.2.2	major CHO metabolism.degradation.starch	10	0.32788240173906524
7.2	OPP.non-reductive PP	1	0.3358397753299913
10.6.2	cell wall.degradation.mannan-xylose-arabinose-fucose	15	0.3376112595981882
3.4	minor CHO metabolism.myo-inositol	2	0.34875614770422336
13.2.5.2	amino acid metabolism.degradation.serine-glycine-cysteine group.glycine	2	0.3519306024185278
23.1.1	nucleotide metabolism.synthesis.pyrimidine	4	0.352672691110765
23.1.2	nucleotide metabolism.synthesis.purine	4	0.3590381251485068
10.2	cell wall.cellulose synthesis	16	0.362145607720206
13.1.5.1	amino acid metabolism.synthesis.serine-glycine-cysteine group.serine	3	0.3637706053181129
3.5	minor CHO metabolism.others	10	0.37013503063750663
13.1.3.4	amino acid metabolism.synthesis.aspartate family.methionine	4	0.3718943899775345
13.2.4.1	amino acid metabolism.degradation.branched-chain group.shared	1	0.3819043753807787
16.2	secondary metabolism.phenylpropanoids	59	0.4531079805367953
13.1.5.2	amino acid metabolism.synthesis.serine-glycine-cysteine group.glycine	1	0.45898787883156383
10.8	cell wall.pectin*esterases	13	0.48665550026224363
13.1.6.3	amino acid metabolism.synthesis.aromatic aa.phenylalanine	1	0.4935835670471482
13.2.2.2	amino acid metabolism.degradation.glutamate family.proline	1	0.49654591169913603
13.1.2.2	amino acid metabolism.synthesis.glutamate family.proline	1	0.5061315817325086
13.2.1.2	amino acid metabolism.degradation.central amino acid metabolism.aspartate	1	0.5067740699431296
12.1	N-metabolism.nitrate metabolism	1	0.5168954163683583
10.5.3	cell wall.cell wall proteins.LRR	6	0.5170095228745915
13.1.3.1	amino acid metabolism.synthesis.aspartate family.asparagine	1	0.5173284230085665
23.3	nucleotide metabolism.salvage	9	0.5232495571364599
12.3	N-metabolism.N-degradation	1	0.5350216675229085
13.1.3.6.1	amino acid metabolism.synthesis.aspartate family.misc.homoserine	5	0.5368216762642777
13.1.1.1	amino acid metabolism.synthesis.central amino acid metabolism.GABA	3	0.5390420378405274
13.1.2.3	amino acid metabolism.synthesis.glutamate family.arginine	1	0.5465389575060406
13.1.6.1	amino acid metabolism.synthesis.aromatic aa.chorismate	2	0.5510485426937152
7.3	OPP.electron transfer	1	0.5864084157298722
16.4	secondary metabolism.N misc	11	0.5982787492085979
10.6.3	cell wall.degradation.pectate lyases and polygalacturonases	24	0.6096023859304343
13.2.6.2	amino acid metabolism.degradation.aromatic aa.tyrosine	3	0.6171771323554318
16.7	secondary metabolism.wax	7	0.6218791067955866
16.5	secondary metabolism.sulfur-containing	1	0.6218894525193454
13.1.4.5	amino acid metabolism.synthesis.branched chain group.isoleucine specific	1	0.6278133415831847
5	fermentation	9	0.644879711802208
11.8	lipid metabolism.''exotics'' (steroids, squalene etc)	31	0.650737726044347
21.2	redox.ascorbate and glutathione	20	0.6816028453088624
13.1.1.3	amino acid metabolism.synthesis.central amino acid metabolism.alanine	2	0.7033416613093233
8.2	TCA / org. transformation.other organic acid transformations	4	0.7038695612285322
2.2.1	major CHO metabolism.degradation.sucrose	9	0.7048785997255758
11.3	lipid metabolism.Phospholipid synthesis	18	0.7165250771183413
13.1.3.5	amino acid metabolism.synthesis.aspartate family.lysine	3	0.7200498864763556
8.1	TCA / org. transformation.TCA	5	0.7245823980361918
2.1.1	major CHO metabolism.synthesis.sucrose	1	0.7372233955119255
11.1	lipid metabolism.FA synthesis and FA elongation	23	0.7399760047949476
13.2.6.3	amino acid metabolism.degradation.aromatic aa.tryptophan	2	0.7482602834528378
13.2.4.4	amino acid metabolism.degradation.branched-chain group.leucine	1	0.7631143917787921
1.2	PS.photorespiration	6	0.7638681875830251
2.1.2	major CHO metabolism.synthesis.starch	9	0.7792438701584992
10.1	cell wall.precursor synthesis	8	0.822326758938651
13.2.3.5	amino acid metabolism.degradation.aspartate family.lysine	5	0.8427009197053418
13.1.4.1	amino acid metabolism.synthesis.branched chain group.common	2	0.8487122557344301
3.2.1	minor CHO metabolism.trehalose.TPS	1	0.8501431465651572
13.1.6.5	amino acid metabolism.synthesis.aromatic aa.tryptophan	10	0.8548205496939998
10.5.4	cell wall.cell wall proteins.HRGP	2	0.8782956862663447
9	mitochondrial electron transport / ATP synthesis	13	0.8805049260108603
13.1.6.4	amino acid metabolism.synthesis.aromatic aa.tyrosine	1	0.9699641278312838
11.10	lipid metabolism.glycolipid synthesis	3	0.9956054506836081
1	PS	96	2.930988785010413E-14
1.1.1	PS.lightreaction.photosystem II	30	4.6645967310965375E-8
28	DNA	195	7.485721260908374E-8
28.1	DNA.synthesis/chromatin structure	129	1.5160480087707714E-6
1.1.1.1	PS.lightreaction.photosystem II.LHC-II	12	2.168934608803852E-6
30.2.99	signalling.receptor kinases.misc	142	4.912932041567508E-5
1.1.2	PS.lightreaction.photosystem I	9	3.532481757537731E-4
26.2	misc.UDP glucosyl and glucoronyl transferases	117	5.121529619756781E-4
1.1.2.2	PS.lightreaction.photosystem I.PSI polypeptide subunits	7	8.946014378672373E-4
1.1.1.2	PS.lightreaction.photosystem II.PSII polypeptide subunits	18	0.0014699065240590947
10	cell wall	159	0.0034022166562821215
28.1.3	DNA.synthesis/chromatin structure.histone	29	0.004812726234746451
4.1.6	glycolysis.cytosolic branch.fructose-2,6-bisphosphatase (Fru2,6BisPase)	4	0.00490269223638913
20.2	stress.abiotic	103	0.005727457321654139
34.7	transport.phosphate	12	0.006183652697124176
4.1	glycolysis.cytosolic branch	8	0.00839077169109516
33.1	development.storage proteins	26	0.011437115946363985
29.5.11.5	protein.degradation.ubiquitin.ubiquitin protease	9	0.012676942336864618
23	nucleotide metabolism	40	0.01270087170567215
17.8	hormone metabolism.salicylic acid	12	0.015075199899339031
17.8.1	hormone metabolism.salicylic acid.synthesis-degradation	12	0.015075199899339031
29.2.1.1.1	protein.synthesis.ribosomal protein.prokaryotic.chloroplast	29	0.01529336647274393
26.12	misc.peroxidases	68	0.015467523550183548
16.8.1	secondary metabolism.flavonoids.anthocyanins	7	0.01696970912965132
31	cell	198	0.0170846864440642
16.8.5	secondary metabolism.flavonoids.isoflavones	5	0.0191894484501635
16.8.5.1	secondary metabolism.flavonoids.isoflavones.isoflavone reductase	5	0.0191894484501635
31.2	cell.division	17	0.024298426373016952
26.3.4	misc.gluco-, galacto- and mannosidases.endoglucanase	9	0.025585411734954475
27.3.6	RNA.regulation of transcription.bHLH,Basic Helix-Loop-Helix family	39	0.027066107493874066
26.13	misc.acid and other phosphatases	24	0.028991945255105955
29.5.9	protein.degradation.AAA type	18	0.03097431259011585
29.2.1.99.99	protein.synthesis.ribosomal protein.unknown.unknown	3	0.031185241263160135
26.23	misc.rhodanese	7	0.035919256922443354
28.99	DNA.unspecified	40	0.0376104339542764
29.5.3	protein.degradation.cysteine protease	16	0.03850684808849181
29.2.1.2	protein.synthesis.ribosomal protein.eukaryotic	40	0.04133453776685234
1.3.4	PS.calvin cycle.GAP	3	0.04242995948559436
16.8.1.21	secondary metabolism.flavonoids.anthocyanins.anthocyanin 5-aromatic acyltransferase	6	0.04288833072898442
29.5.11.4.3.2	protein.degradation.ubiquitin.E3.SCF.FBOX	37	0.04769970656542727
17.7	hormone metabolism.jasmonate	14	0.048219428462673214
17.7.1	hormone metabolism.jasmonate.synthesis-degradation	14	0.048219428462673214
27.1.19	RNA.processing.ribonucleases	14	0.04923300608515715
11.2.3	lipid metabolism.FA desaturation.omega 3 desaturase	6	0.04926393965310549
29.2.1.1	protein.synthesis.ribosomal protein.prokaryotic	45	0.05055693892816304
9.9	mitochondrial electron transport / ATP synthesis.F1-ATPase	2	0.058934270668345556
29.2.1.99	protein.synthesis.ribosomal protein.unknown	9	0.06014014675287127
27.1.20	RNA.processing.degradation dicer	3	0.06091744944790484
20.2.1	stress.abiotic.heat	45	0.06512171560993063
23.5.4	nucleotide metabolism.deoxynucleotide metabolism.ribonucleoside-diphosphate reductase	3	0.0657563167019338
30.2	signalling.receptor kinases	301	0.06713782421902503
11.8.1.2	lipid metabolism.''exotics'' (steroids, squalene etc).sphingolipids.serine C-palmitoyltransferase	2	0.06732263286754057
17.1	hormone metabolism.abscisic acid	18	0.06923604168094252
29.2.1.1.1.1	protein.synthesis.ribosomal protein.prokaryotic.chloroplast.30S subunit	8	0.07656458720793169
16	secondary metabolism	170	0.07690744722244265
16.1.5	secondary metabolism.isoprenoids.terpenoids	12	0.07828195000358715
9.2	mitochondrial electron transport / ATP synthesis.NADH-DH.type II	4	0.07884833477446393
29.2.1.1.1.2	protein.synthesis.ribosomal protein.prokaryotic.chloroplast.50S subunit	21	0.07921322635038286
26.6	misc.O-methyl transferases	15	0.08022564070055162
11.9.2.1	lipid metabolism.lipid degradation.lipases.triacylglycerol lipase	14	0.08196472005824806
30.5	signalling.G-proteins	33	0.08509990904355638
16.8.2	secondary metabolism.flavonoids.chalcones	10	0.08546825472975973
11.6	lipid metabolism.lipid transfer proteins etc	2	0.08591905372390124
29.1.1	protein.aa activation.tyrosine-tRNA ligase	1	0.08595051684391931
29.5.11.4.5	protein.degradation.ubiquitin.E3.BTB/POZ Cullin3	14	0.08651628743896
29.5.11.4.5.2	protein.degradation.ubiquitin.E3.BTB/POZ Cullin3.BTB/POZ	14	0.08651628743896
29.1.19	protein.aa activation.arginine-tRNA ligase	1	0.08742795453698538
1.3.6	PS.calvin cycle.aldolase	5	0.08839638497504443
20.2.99	stress.abiotic.unspecified	31	0.09126285809830992
29.2.1.2.2	protein.synthesis.ribosomal protein.eukaryotic.60S subunit	27	0.09190453175708665
29.4.1.59	protein.postranslational modification.kinase.receptor like cytoplasmatic kinase IX	1	0.09367475356663135
34.21	transport.calcium	8	0.09459103284998437
17.3.2	hormone metabolism.brassinosteroid.signal transduction	1	0.0945956829553325
17.3.2.99	hormone metabolism.brassinosteroid.signal transduction.other	1	0.0945956829553325
27.3.99	RNA.regulation of transcription.unclassified	71	0.09581563218827771
16.1.2	secondary metabolism.isoprenoids.mevalonate pathway	7	0.09691193198059571
9.5	mitochondrial electron transport / ATP synthesis.cytochrome c reductase	1	0.10180600800635364
1.1.6	PS.lightreaction.NADH DH	2	0.10190751558742406
29.5.11.4.3.1	protein.degradation.ubiquitin.E3.SCF.SKP	4	0.10334140647373391
26.16	misc.myrosinases-lectin-jacalin	8	0.10885505579224054
27.3.22	RNA.regulation of transcription.HB,Homeobox transcription factor family	23	0.10909425520767924
5.2	fermentation.PDC	3	0.10937154078149502
30.2.2	signalling.receptor kinases.leucine rich repeat II	1	0.10937306396847556
33	development	256	0.10948190969024796
17.3.1.2.3	hormone metabolism.brassinosteroid.synthesis-degradation.sterols.CYP51	1	0.11011633893906048
11.3.4	lipid metabolism.Phospholipid synthesis.CDP-diacylglycerol-inositol 3-phosphatidyltransferase	1	0.11244587477443946
17.7.1.5	hormone metabolism.jasmonate.synthesis-degradation.12-Oxo-PDA-reductase	5	0.11319352542587978
11.9.4.2	lipid metabolism.lipid degradation.beta-oxidation.acyl CoA DH	2	0.11333718440809327
8.1.4	TCA / org. transformation.TCA.IDH	1	0.11335799466239824
11.9	lipid metabolism.lipid degradation	42	0.11512960057779487
30.2.22	signalling.receptor kinases.proline extensin like	1	0.11706488257966985
7.1.2	OPP.oxidative PP.6-phosphogluconolactonase	1	0.11816379902982944
18.4	Co-factor and vitamine metabolism.pantothenate	1	0.11879537471055318
18.4.2	Co-factor and vitamine metabolism.pantothenate.3-methyl-2-oxobutanoate hydroxymethyltransferase (KPHMT,PANB)	1	0.11879537471055318
27.3.41	RNA.regulation of transcription.B3 transcription factor family	4	0.11913792690223671
26.28	misc.GDSL-motif lipase	50	0.11951034094200264
9.2.1	mitochondrial electron transport / ATP synthesis.NADH-DH.type II.internal matrix	2	0.12051828261495803
27.3.62	RNA.regulation of transcription.Nucleosome/chromatin assembly factor group	4	0.12081241638280202
1.1.3	PS.lightreaction.cytochrome b6/f	2	0.12136929319244483
3.2	minor CHO metabolism.trehalose	12	0.12165215676927188
27.3.15	RNA.regulation of transcription.CCAAT box binding factor family, HAP3	2	0.12291294848140466
27.3.46	RNA.regulation of transcription.DNA methyltransferases	3	0.1258964599180559
1.3.2	PS.calvin cycle.rubisco small subunit	2	0.12639817209668025
11.9.3.2	lipid metabolism.lipid degradation.lysophospholipases.carboxylesterase	4	0.12777888733498766
27.3.11	RNA.regulation of transcription.C2H2 zinc finger family	24	0.12947072255314218
13.1.6.5.5	amino acid metabolism.synthesis.aromatic aa.tryptophan.tryptophan synthase	2	0.13563383137159102
34.6	transport.sulphate	6	0.13586569353884448
11.3.5	lipid metabolism.Phospholipid synthesis.diacylglycerol kinase	2	0.1369411463102518
16.8.4	secondary metabolism.flavonoids.flavonols	9	0.1370698831033157
17.7.1.4	hormone metabolism.jasmonate.synthesis-degradation.allene oxidase cyclase	1	0.1373988896848934
17.2.2	hormone metabolism.auxin.signal transduction	9	0.1378974231666624
8.1.3	TCA / org. transformation.TCA.aconitase	1	0.13900063503886328
17.2	hormone metabolism.auxin	46	0.14049975193516334
29.2.1.1.1.1.15	protein.synthesis.ribosomal protein.prokaryotic.chloroplast.30S subunit.S15	1	0.14115861540738917
29.2.1.1.3.2.4	protein.synthesis.ribosomal protein.prokaryotic.unknown organellar.50S subunit.L4	1	0.14352538761313527
14.2	S-assimilation.APR	1	0.14919757337985934
1.1.4.3	PS.lightreaction.ATP synthase.epsilon chain	1	0.15004874100356647
29.3.2	protein.targeting.mitochondria	6	0.15072665066019564
30.4.1	signalling.phosphinositides.phosphatidylinositol-4-phosphate 5-kinase	6	0.15201240173202807
1.1.5	PS.lightreaction.other electron carrier (ox/red)	11	0.1538518357658667
29.5.5	protein.degradation.serine protease	32	0.1549553925379061
1.3.13	PS.calvin cycle.rubisco interacting	3	0.15646972692953076
26.3	misc.gluco-, galacto- and mannosidases	43	0.1572514992390131
30.3	signalling.calcium	53	0.1579126466155557
27.3.18	RNA.regulation of transcription.E2F/DP transcription factor family	3	0.15851371267675607
28.2	DNA.repair	27	0.15862034621221813
1.3.1	PS.calvin cycle.rubisco large subunit	1	0.1617542658740203
27.3.8	RNA.regulation of transcription.C2C2(Zn) DOF zinc finger family	7	0.1640753604189935
10.5	cell wall.cell wall proteins	14	0.16689077778947903
13.1.5.3.1	amino acid metabolism.synthesis.serine-glycine-cysteine group.cysteine.OASTL	4	0.16728273020587925
29.5.2	protein.degradation.autophagy	5	0.16760300436403275
29.5.11.4.3	protein.degradation.ubiquitin.E3.SCF	41	0.17017266424330146
26.19	misc.plastocyanin-like	24	0.17148992338186897
9.2.2	mitochondrial electron transport / ATP synthesis.NADH-DH.type II.external	3	0.17156724404207788
26.4.1	misc.beta 1,3 glucan hydrolases.glucan endo-1,3-beta-glucosidase	33	0.1721883857692874
1.1.2.1	PS.lightreaction.photosystem I.LHC-I	2	0.17272597935806355
35	not assigned	3297	0.1727990711748681
35.2	not assigned.unknown	3297	0.1727990711748681
27.3.9	RNA.regulation of transcription.C2C2(Zn) GATA transcription factor family	12	0.1737234062884488
16.8.1.12	secondary metabolism.flavonoids.anthocyanins.anthocyanidin 3-O-glucosyltransferase	1	0.17509278133020653
29.2.1.1.3.2.18	protein.synthesis.ribosomal protein.prokaryotic.unknown organellar.50S subunit.L18	1	0.17519929383919433
34.19.1	transport.Major Intrinsic Proteins.PIP	7	0.1762492293511917
17.5.2	hormone metabolism.ethylene.signal transduction	40	0.17703410165814848
20.1.7	stress.biotic.PR-proteins	210	0.18245794674902227
29.2.1.1.2.1.7	protein.synthesis.ribosomal protein.prokaryotic.mitochondrion.30S subunit.S7	1	0.18553982043657768
23.5.3	nucleotide metabolism.deoxynucleotide metabolism.cytosine deaminase	1	0.1860963023833655
19.14	tetrapyrrole synthesis.protochlorophyllide reductase	2	0.18629972013309937
23.4.99	nucleotide metabolism.phosphotransfer and pyrophosphatases.misc	2	0.18915443703471094
34.99	transport.misc	79	0.18938591264212723
17.6.1.13	hormone metabolism.gibberelin.synthesis-degradation.GA2 oxidase	3	0.19118458046471887
18.13	Co-factor and vitamine metabolism.isochorismatase	1	0.19127392258024
29.2.1.2.1.11	protein.synthesis.ribosomal protein.eukaryotic.40S subunit.S11	1	0.19218509501457703
29.4.1	protein.postranslational modification.kinase	118	0.19249036482229243
2.2.2.1	major CHO metabolism.degradation.starch.starch cleavage	7	0.19294891081762391
4.3	glycolysis.unclear/dually targeted	3	0.19541873970526835
31.1	cell.organisation	105	0.19677523601926333
23.1.99	nucleotide metabolism.synthesis.unspecified	1	0.1991207965403099
14.15	S-assimilation.AKN	1	0.19935509645741636
33.99	development.unspecified	202	0.20062924739780819
11.9.4.5	lipid metabolism.lipid degradation.beta-oxidation.acyl-CoA thioesterase	1	0.2012367508561793
1.1.5.3	PS.lightreaction.other electron carrier (ox/red).ferredoxin reductase	2	0.20273564668724675
16.1.1.1	secondary metabolism.isoprenoids.non-mevalonate pathway.DXS	1	0.2030125372638534
29.4.1.57	protein.postranslational modification.kinase.receptor like cytoplasmatic kinase VII	115	0.20458966023413594
10.2.1	cell wall.cellulose synthesis.cellulose synthase	7	0.20670509665878922
20.2.5	stress.abiotic.light	1	0.20804539832479274
29.5.11.4.6	protein.degradation.ubiquitin.E3.DCX	1	0.20804539832479274
29.5.11.4.2	protein.degradation.ubiquitin.E3.RING	88	0.2096074464536848
17.5.1	hormone metabolism.ethylene.synthesis-degradation	23	0.20976239255941337
16.1.2.9	secondary metabolism.isoprenoids.mevalonate pathway.farnesyl pyrophosphate synthetase	2	0.21030327331401044
1.3.8	PS.calvin cycle.transketolase	1	0.2113282240392265
29.2.1.2.2.13	protein.synthesis.ribosomal protein.eukaryotic.60S subunit.L13	2	0.21159858860060507
30.11	signalling.light	31	0.21276474852898458
24	Biodegradation of Xenobiotics	27	0.21360222347870872
27.3.20	RNA.regulation of transcription.G2-like transcription factor family, GARP	15	0.21493187745258457
12	N-metabolism	5	0.21939386020844087
16.2.1.3	secondary metabolism.phenylpropanoids.lignin biosynthesis.4CL	1	0.2206433055008078
11.3.10	lipid metabolism.Phospholipid synthesis.(S)-coclaurine-N-methyltransferase	1	0.22624332389560922
31.3	cell.cycle	33	0.2272037091687299
16.1.2.2	secondary metabolism.isoprenoids.mevalonate pathway.HMG-CoA synthase	1	0.2286926075657561
17.6.1.12	hormone metabolism.gibberelin.synthesis-degradation.GA3 oxidase	1	0.23129113432431556
3.99	minor CHO metabolism.misc	1	0.23142160900467745
1.3.9	PS.calvin cycle.seduheptulose bisphosphatase	1	0.23233639567347497
29.5.11.20	protein.degradation.ubiquitin.proteasom	4	0.23253052267381452
30.2.8	signalling.receptor kinases.leucine rich repeat VIII-1	5	0.2335895033299522
30.2.8.2	signalling.receptor kinases.leucine rich repeat VIII-2	5	0.2335895033299522
29.3.1	protein.targeting.nucleus	7	0.23397950094150746
27.3.37	RNA.regulation of transcription.AS2,Lateral Organ Boundaries Gene Family	13	0.2351978009139283
17.1.2	hormone metabolism.abscisic acid.signal transduction	3	0.2372638983259167
26.3.1	misc.gluco-, galacto- and mannosidases.alpha-galactosidase	4	0.23854363145485347
27.3.23	RNA.regulation of transcription.HSF,Heat-shock transcription factor family	8	0.23882510648864574
11.7	lipid metabolism.unassigned	1	0.24135661072137404
29.5.11.1	protein.degradation.ubiquitin.ubiquitin	5	0.24318612835521347
10.5.1.1	cell wall.cell wall proteins.AGPs.AGP	5	0.24348853274719828
20	stress	450	0.24452742726189114
27.3.31	RNA.regulation of transcription.TUB transcription factor family	1	0.24459832193361836
17.1.1	hormone metabolism.abscisic acid.synthesis-degradation	10	0.24921704432614245
18.7	Co-factor and vitamine metabolism.iron-sulphur clusters	2	0.2493590846842748
31.2.5	cell.division.plastid	1	0.2514497414302215
29.2.1.2.1	protein.synthesis.ribosomal protein.eukaryotic.40S subunit	13	0.251517195500707
1.1.3.1	PS.lightreaction.cytochrome b6/f.iron sulfur subunit	1	0.2533919033286076
3.8	minor CHO metabolism.galactose	1	0.25380943635088093
3.8.2	minor CHO metabolism.galactose.alpha-galactosidases	1	0.25380943635088093
18	Co-factor and vitamine metabolism	14	0.2542627911723132
30.4.4	signalling.phosphinositides.phosphoinositide phospholipase C	1	0.2543668916942655
3	minor CHO metabolism	32	0.2548250347532208
9.1	mitochondrial electron transport / ATP synthesis.NADH-DH	3	0.2548849950362505
27.3.40	RNA.regulation of transcription.Aux/IAA family	8	0.2597305683373994
11.9.3.5	lipid metabolism.lipid degradation.lysophospholipases.phosphoinositide phospholipase C	2	0.25991880798679845
29.2.1.1.3.2.1185	protein.synthesis.ribosomal protein.prokaryotic.unknown organellar.50S subunit.L18/L5	1	0.2606969929243308
1.2.4.4	PS.photorespiration.glycine cleavage.H protein	1	0.26197597825517827
27.3.50	RNA.regulation of transcription.General Transcription	5	0.2625643532878443
19.11	tetrapyrrole synthesis.magnesium protoporphyrin IX methyltransferase	1	0.26454693870177404
29.2.1.1.3.1.1	protein.synthesis.ribosomal protein.prokaryotic.unknown organellar.30S subunit.S1	2	0.26485647527367906
3.1.2.1	minor CHO metabolism.raffinose family.raffinose synthases.known	1	0.26655856100755326
1.1.40	PS.lightreaction.cyclic electron flow-chlororespiration	5	0.26737735220560666
1.1.5.1	PS.lightreaction.other electron carrier (ox/red).plastocyanin	1	0.2677127729675628
27.3.69	RNA.regulation of transcription.SET-domain transcriptional regulator family	10	0.2692392416051471
30.4	signalling.phosphinositides	9	0.27008859094780624
16.1.4.4	secondary metabolism.isoprenoids.carotenoids.lycopene epsilon cyclase	1	0.27177954142617833
1.1.4	PS.lightreaction.ATP synthase	3	0.2736502097067661
27.3.63	RNA.regulation of transcription.PHD finger transcription factor	1	0.27485724176262094
29.2.5	protein.synthesis.release	2	0.27763921980544154
26.4	misc.beta 1,3 glucan hydrolases	38	0.2796775584943483
16.1.1	secondary metabolism.isoprenoids.non-mevalonate pathway	6	0.2852326108443433
34.18	transport.unspecified anions	2	0.2855714293434839
11.2.4	lipid metabolism.FA desaturation.omega 6 desaturase	1	0.2855895416828231
23.5.5	nucleotide metabolism.deoxynucleotide metabolism.dUTP diphosphatase	1	0.2886203453766954
4.3.12	glycolysis.unclear/dually targeted.phosphoglycerate mutase	2	0.28954054471438767
13.1.5	amino acid metabolism.synthesis.serine-glycine-cysteine group	14	0.29026951474272567
26.1	misc.misc2	14	0.29084147233078506
1.1.5.2	PS.lightreaction.other electron carrier (ox/red).ferredoxin	4	0.2929834208569908
2.2.2.1.2	major CHO metabolism.degradation.starch.starch cleavage.beta amylase	3	0.29467207762363906
29	protein	796	0.2965317759128048
26.11	misc.alcohol dehydrogenases	14	0.2974319567197863
26.11.1	misc.alcohol dehydrogenases	14	0.2974319567197863
23.1.1.10	nucleotide metabolism.synthesis.pyrimidine.CTP synthetase	2	0.29791920571678715
33.2	development.late embryogenesis abundant	17	0.30206600835125225
27.3.67	RNA.regulation of transcription.putative transcription regulator	25	0.3070785582972477
34.15	transport.potassium	13	0.3080017229145253
27.3.24	RNA.regulation of transcription.MADS box transcription factor family	14	0.30937414336233143
3.1.2	minor CHO metabolism.raffinose family.raffinose synthases	2	0.31073161852995074
10.6	cell wall.degradation	43	0.31540688606499684
26.21	misc.protease inhibitor/seed storage/lipid transfer protein (LTP) family protein	13	0.3158238103270101
29.4	protein.postranslational modification	257	0.321412473158631
12.2.1	N-metabolism.ammonia metabolism.glutamate synthase	1	0.3250304447319572
7.2.4	OPP.non-reductive PP.ribose 5-phosphate isomerase	1	0.3358397753299913
6.5	gluconeogenese/ glyoxylate cycle.pyruvate dikinase	1	0.336175998778639
2.2.1.3	major CHO metabolism.degradation.sucrose.invertases	3	0.33861567847038376
2.2.1.3.1	major CHO metabolism.degradation.sucrose.invertases.neutral	1	0.34362767366742486
17	hormone metabolism	179	0.3454780674826708
23.1.2.1	nucleotide metabolism.synthesis.purine.amidophosphoribosyltransferase	1	0.34636332906406603
27.3.34	RNA.regulation of transcription.Orphan family	1	0.34670625859621507
3.4.5	minor CHO metabolism.myo-inositol.inositol phosphatase	2	0.34875614770422336
29.2.6	protein.synthesis.ribosomal RNA	2	0.3497309597871767
13.2.5	amino acid metabolism.degradation.serine-glycine-cysteine group	2	0.3519306024185278
13.1.3.4.12	amino acid metabolism.synthesis.aspartate family.methionine.homocysteine S-methyltransferase	1	0.35274248654268214
27.3.3	RNA.regulation of transcription.AP2/EREBP, APETALA2/Ethylene-responsive element binding protein family	40	0.3533474054270638
34.4	transport.nitrate	3	0.35455515171593754
20.1.7.6	stress.biotic.PR-proteins.proteinase inhibitors	1	0.3558725658388593
20.1.7.6.1	stress.biotic.PR-proteins.proteinase inhibitors.trypsin inhibitor	1	0.3558725658388593
16.1.3.3	secondary metabolism.isoprenoids.tocopherol biosynthesis.MPBQ/MSBQ methyltransferase	1	0.3577939877310181
13.1.6.2.1	amino acid metabolism.synthesis.aromatic aa.phenylalanine and tyrosine.chorismate mutase	1	0.3581440373623894
17.2.1	hormone metabolism.auxin.synthesis-degradation	1	0.3595463894902738
29.8	protein.assembly and cofactor ligation	5	0.3602968432265421
34.8	transport.metabolite transporters at the envelope membrane	9	0.36035608945174
29.2.1.1.1.2.12	protein.synthesis.ribosomal protein.prokaryotic.chloroplast.50S subunit.L12	3	0.3605130677260513
29.6	protein.folding	19	0.36114465308833843
10.1.20	cell wall.precursor synthesis.phosphomannose isomerase	2	0.3625605426994415
17.6	hormone metabolism.gibberelin	9	0.36476854341933973
11.9.4.13	lipid metabolism.lipid degradation.beta-oxidation.acyl CoA reductase	2	0.36481060235154533
27.3.59	RNA.regulation of transcription.Methyl binding domain proteins	3	0.36591833673174423
14.1	S-assimilation.ATPS	1	0.36785471669056125
17.1.3	hormone metabolism.abscisic acid.induced-regulated-responsive-activated	5	0.3678927938366806
27.3.21	RNA.regulation of transcription.GRAS transcription factor family	5	0.36821144091527547
34.19.2	transport.Major Intrinsic Proteins.TIP	3	0.3688972298800859
17.6.1	hormone metabolism.gibberelin.synthesis-degradation	6	0.3708984683483927
31.3.1	cell.cycle.peptidylprolyl isomerase	10	0.3722874649043999
27.3.19	RNA.regulation of transcription.EIN3-like(EIL) transcription factor family	3	0.3726160862353683
21.5.1	redox.peroxiredoxin.BAS1	1	0.37268121376018887
13.1.3.6.1.3	amino acid metabolism.synthesis.aspartate family.misc.homoserine.homoserine dehydrogenase	1	0.3728607231287107
13.1.3	amino acid metabolism.synthesis.aspartate family	13	0.375542827912722
23.2.2	nucleotide metabolism.degradation.purine	2	0.3769577261706925
19.12	tetrapyrrole synthesis.magnesium-protoporphyrin IX monomethyl ester (oxidative) cyclase	1	0.37917725577978567
29.7.5	protein.glycosylation.alpha-1,3-mannosyl-glycoprotein-beta-1,2-N-acetylglucosaminyltransferase(GnTI)	3	0.3797036951500587
29.7.8	protein.glycosylation.alpha-1,6-mannosyl-glycoprotein-beta-1,2-N-acetylglucosaminyltransferase(GnTII)	3	0.3797036951500587
16.2.1.4	secondary metabolism.phenylpropanoids.lignin biosynthesis.HCT	2	0.3844160596288413
30.7	signalling.14-3-3 proteins	1	0.38464349287432864
34.3	transport.amino acids	33	0.3853430990809983
1.2.1	PS.photorespiration.phosphoglycolate phosphatase	1	0.3861092556528656
27.3.53	RNA.regulation of transcription.High mobility group (HMG) family	1	0.38776230921880167
13.1.5.1.1	amino acid metabolism.synthesis.serine-glycine-cysteine group.serine.phosphoglycerate dehydrogenase	2	0.39000336045949857
17.4.1	hormone metabolism.cytokinin.synthesis-degradation	2	0.3915713757447594
29.2.1.2.2.30	protein.synthesis.ribosomal protein.eukaryotic.60S subunit.L30	1	0.39200633448960875
9.1.2	mitochondrial electron transport / ATP synthesis.NADH-DH.localisation not clear	1	0.39256197297041956
29.5.11.4	protein.degradation.ubiquitin.E3	146	0.39437362833982137
1.2.4	PS.photorespiration.glycine cleavage	2	0.39485033989841045
17.4.2	hormone metabolism.cytokinin.signal transduction	1	0.4020807129383115
10.3.2	cell wall.hemicellulose synthesis.glucuronoxylan	2	0.4029204010536711
26.3.2	misc.gluco-, galacto- and mannosidases.beta-galactosidase	2	0.4030535153071967
34.12	transport.metal	38	0.4049892353674535
13.2.4	amino acid metabolism.degradation.branched chain group	2	0.4057213301464382
29.2.1.1.1.1.10	protein.synthesis.ribosomal protein.prokaryotic.chloroplast.30S subunit.S10	1	0.40831301743524184
29.1.7	protein.aa activation.alanine-tRNA ligase	2	0.4097427722314313
29.2.1.1.3.1	protein.synthesis.ribosomal protein.prokaryotic.unknown organellar.30S subunit	4	0.41071604684491314
10.1.4	cell wall.precursor synthesis.UGD	1	0.4128815298799515
2.2.2.4	major CHO metabolism.degradation.starch.D enzyme	1	0.4134547157184345
18.2	Co-factor and vitamine metabolism.thiamine	2	0.41405832888441285
29.2.1.2.2.44	protein.synthesis.ribosomal protein.eukaryotic.60S subunit.L44	3	0.4151516763221387
27.3.73	RNA.regulation of transcription.Zn-finger(CCHC)	1	0.4153687348810217
29.2.1.1.1.2.24	protein.synthesis.ribosomal protein.prokaryotic.chloroplast.50S subunit.L24	1	0.41594395979555854
29.2.1.1.2	protein.synthesis.ribosomal protein.prokaryotic.mitochondrion	2	0.4159548103980364
29.2.1.1.2.1	protein.synthesis.ribosomal protein.prokaryotic.mitochondrion.30S subunit	2	0.4159548103980364
34.5	transport.ammonium	6	0.41618262726865496
18.5	Co-factor and vitamine metabolism.folate & vitamine K	3	0.4192570244379814
18.5.2	Co-factor and vitamine metabolism.folate & vitamine K.vitamine K	3	0.4192570244379814
23.4.10	nucleotide metabolism.phosphotransfer and pyrophosphatases.nucleoside diphosphate kinase	1	0.4213353652811675
11.9.4.9	lipid metabolism.lipid degradation.beta-oxidation.multifunctional	2	0.4231806551782742
1.1.30	PS.lightreaction.state transition	1	0.427157121117137
17.3	hormone metabolism.brassinosteroid	6	0.42867116355755575
9.1.1	mitochondrial electron transport / ATP synthesis.NADH-DH.complex I	2	0.4296495310445808
4.2	glycolysis.plastid branch	5	0.43104958436229335
29.2.1.99.2.18	protein.synthesis.ribosomal protein.unknown.large subunit.L18	1	0.4320441929171883
13.99	amino acid metabolism.misc	3	0.4350053456293391
30.2.3	signalling.receptor kinases.leucine rich repeat III	15	0.43672980108419185
17.2.3	hormone metabolism.auxin.induced-regulated-responsive-activated	36	0.4415723141444832
17.7.1.3	hormone metabolism.jasmonate.synthesis-degradation.allene oxidase synthase	3	0.44277610110942206
23.2.1	nucleotide metabolism.degradation.pyrimidine	2	0.4428988907324027
34.19.3	transport.Major Intrinsic Proteins.NIP	8	0.44841511596977823
29.5.7	protein.degradation.metalloprotease	10	0.44944246924620623
10.1.2	cell wall.precursor synthesis.UGE	1	0.45110889608362914
22.1.2	polyamine metabolism.synthesis.SAM decarboxylase	1	0.4527188294019977
16.1.3.1	secondary metabolism.isoprenoids.tocopherol biosynthesis.hydroxyphenylpyruvate dioxygenase	1	0.456555397502147
4.1.16	glycolysis.cytosolic branch.phospho-enol-pyruvate carboxylase kinase (PPCK)	1	0.4565553975021471
4.3.16	glycolysis.unclear/dually targeted.phospho-enol-pyruvate carboxylase kinase (PEPCK)	1	0.4565553975021471
26.9	misc.glutathione S transferases	31	0.4584151972854321
21.6	redox.dismutases and catalases	2	0.4586715902947871
13.1.5.2.41	amino acid metabolism.synthesis.serine-glycine-cysteine group.glycine.sarcosine oxidase	1	0.45898787883156383
29.2.1.1.3.99	protein.synthesis.ribosomal protein.prokaryotic.unknown organellar.unknown	2	0.4593894071316944
6.4	gluconeogenese/ glyoxylate cycle.PEPCK	1	0.4599019282293031
27.3.44	RNA.regulation of transcription.Chromatin Remodeling Factors	12	0.4625282650493188
27.3.64	RNA.regulation of transcription.PHOR1	8	0.4674877397946279
14.3	S-assimilation.sulfite redox	1	0.4683793531249172
29.7.13	protein.glycosylation.alpha-1,4-fucosyltransferase(alpha-1,4-FucT)	1	0.4694065373537004
3.1.1	minor CHO metabolism.raffinose family.galactinol synthases	2	0.46979545565070396
3.1.1.2	minor CHO metabolism.raffinose family.galactinol synthases.putative	2	0.46979545565070396
19.40	tetrapyrrole synthesis.regulation	2	0.4699408954818618
4.1.8	glycolysis.cytosolic branch.glyceraldehyde 3-phosphate dehydrogenase (GAP-DH)	2	0.470814056703419
13.1.6.5.4	amino acid metabolism.synthesis.aromatic aa.tryptophan.indole-3-glycerol phosphate synthase	1	0.4710526197622466
27.3.17	RNA.regulation of transcription.CPP(Zn),CPP1-related transcription factor family	3	0.4717796591403629
17.5.3	hormone metabolism.ethylene.induced-regulated-responsive-activated	8	0.4730915326473768
13.1.1	amino acid metabolism.synthesis.central amino acid metabolism	5	0.4735382433141775
4.2.14	glycolysis.plastid branch.pyruvate kinase (PK)	1	0.474767922792101
29.4.1.55	protein.postranslational modification.kinase.receptor like cytoplasmatic kinase V	1	0.47538870046464327
22.1.3	polyamine metabolism.synthesis.arginine decarboxylase	1	0.47642431875267466
27.3.25	RNA.regulation of transcription.MYB domain transcription factor family	85	0.4772895652042517
10.2.2	cell wall.cellulose synthesis.COBRA	2	0.48180378004823177
21.4	redox.glutaredoxins	11	0.4827746471998524
9.6	mitochondrial electron transport / ATP synthesis.cytochrome c	1	0.48287265713154937
27.3.12	RNA.regulation of transcription.C3H zinc finger family	3	0.48340245141083393
30.99	signalling.unspecified	2	0.48609025292223274
13.1.6.3.1	amino acid metabolism.synthesis.aromatic aa.phenylalanine.arogenate dehydratase / prephenate dehydratase	1	0.4935835670471482
1.2.6	PS.photorespiration.hydroxypyruvate reductase	1	0.4940061790584622
18.8	Co-factor and vitamine metabolism.ubiquinone	1	0.49569856138514096
18.8.1	Co-factor and vitamine metabolism.ubiquinone.hexaprenyldihydroxybenzoate methyltransferase	1	0.49569856138514096
13.2.2	amino acid metabolism.degradation.glutamate family	1	0.49654591169913603
11.8.1	lipid metabolism.''exotics'' (steroids, squalene etc).sphingolipids	11	0.49827155921880184
15.3	metal handling.regulation	4	0.501264573136974
16.2.1.10	secondary metabolism.phenylpropanoids.lignin biosynthesis.CAD	4	0.5040380485307132
17.3.1.2.4	hormone metabolism.brassinosteroid.synthesis-degradation.sterols.FACKEL	2	0.5051025879557698
29.2.1.1.1.1.6	protein.synthesis.ribosomal protein.prokaryotic.chloroplast.30S subunit.S6	1	0.5057034944454011
11.1.15	lipid metabolism.FA synthesis and FA elongation.ACP desaturase	2	0.5063131957374385
13.2.1	amino acid metabolism.degradation.central amino acid metabolism	1	0.5067740699431296
27.4	RNA.RNA binding	29	0.5085490019847386
26.30	misc. other Ferredoxins and Rieske domain	3	0.5087169747637984
10.1.5	cell wall.precursor synthesis.UXS	2	0.5091944939394807
21	redox	50	0.5097310856005097
29.2.1.1.1.2.17	protein.synthesis.ribosomal protein.prokaryotic.chloroplast.50S subunit.L17	1	0.5104229180447282
12.1.2	N-metabolism.nitrate metabolism.nitrite reductase	1	0.5168954163683583
7	OPP	4	0.5172676932512592
11.9.2.2	lipid metabolism.lipid degradation.lipases.acylglycerol lipase	1	0.5192792741727965
27.3.30	RNA.regulation of transcription.Trihelix, Triple-Helix transcription factor family	2	0.5211123777867654
10.8.1	cell wall.pectin*esterases.PME	11	0.5223979181951829
27.3.57	RNA.regulation of transcription.JUMONJI family	1	0.5273391531075067
4.2.4	glycolysis.plastid branch.phosphofructokinase (PFK)	3	0.5284967161249292
13.1.1.1.2	amino acid metabolism.synthesis.central amino acid metabolism.GABA.GABA transaminase	2	0.5305318488047903
23.2.1.4	nucleotide metabolism.degradation.pyrimidine.dihydropyrimidinase	1	0.5315026692623974
29.2.1.1.3.1.6	protein.synthesis.ribosomal protein.prokaryotic.unknown organellar.30S subunit.S6	1	0.5337006675873344
12.3.1	N-metabolism.N-degradation.glutamate dehydrogenase	1	0.5350216675229085
29.5.4	protein.degradation.aspartate protease	26	0.5352643856466048
18.3	Co-factor and vitamine metabolism.riboflavin	1	0.5356827852126913
18.3.1	Co-factor and vitamine metabolism.riboflavin.GTP cyclohydrolase II	1	0.5356827852126913
27.3.49	RNA.regulation of transcription.GeBP like	1	0.5361237588466921
13.1.3.6	amino acid metabolism.synthesis.aspartate family.misc	5	0.5368216762642777
31.5	cell.cell death	9	0.5381742505708432
18.5.2.4	Co-factor and vitamine metabolism.folate & vitamine K.o-Succinyl-BenzoylCoa Synthetase	1	0.5385523756708837
29.2.1.99.1	protein.synthesis.ribosomal protein.unknown.small subunit	3	0.538659052642436
29.2.1.99.1.21	protein.synthesis.ribosomal protein.unknown.small subunit.S21	3	0.538659052642436
28.1.1	DNA.synthesis/chromatin structure.retrotransposon/transposase	16	0.54013903613052
28.1.1.4	DNA.synthesis/chromatin structure.retrotransposon/transposase.hat-like transposase	16	0.54013903613052
29.1.4	protein.aa activation.leucine-tRNA ligase	2	0.5408198716486825
23.1	nucleotide metabolism.synthesis	10	0.5436100277646428
27.3.2	RNA.regulation of transcription.Alfin-like	1	0.5436481579071452
29.2.1	protein.synthesis.ribosomal protein	94	0.5446842072664295
12.2.2	N-metabolism.ammonia metabolism.glutamine synthase	1	0.5454262109162644
13.1.2.3.31	amino acid metabolism.synthesis.glutamate family.arginine.aspartate racemase	1	0.5465389575060406
29.2.1.1.3.2	protein.synthesis.ribosomal protein.prokaryotic.unknown organellar.50S subunit	8	0.5466718883699908
29.2.1.1.1.1.13	protein.synthesis.ribosomal protein.prokaryotic.chloroplast.30S subunit.S13	1	0.5467616416910692
30.2.16	signalling.receptor kinases.Catharanthus roseus-like RLK1	5	0.5496305551227763
34.9	transport.metabolite transporters at the mitochondrial membrane	10	0.5531353886988379
29.2.1.1.1.1.9	protein.synthesis.ribosomal protein.prokaryotic.chloroplast.30S subunit.S9	1	0.5536870517709409
16.1.4	secondary metabolism.isoprenoids.carotenoids	5	0.5537329161710047
21.99	redox.misc	1	0.5548080638067102
23.3.1	nucleotide metabolism.salvage.phosphoribosyltransferases	2	0.5550078276632469
23.3.1.1	nucleotide metabolism.salvage.phosphoribosyltransferases.aprt	2	0.5550078276632469
13.2.6	amino acid metabolism.degradation.aromatic aa	5	0.5550367887944967
23.3.2	nucleotide metabolism.salvage.nucleoside kinases	1	0.558177742421317
23.3.2.2	nucleotide metabolism.salvage.nucleoside kinases.uridine kinase	1	0.558177742421317
29.3.99	protein.targeting.unknown	2	0.5596179463676261
6.9	gluconeogenese/ glyoxylate cycle.isocitrate lyase	1	0.559753657515432
11.1.9	lipid metabolism.FA synthesis and FA elongation.long chain fatty acid CoA ligase	1	0.5606551482403449
30.1.1	signalling.in sugar and nutrient physiology	11	0.5609044907170302
21.3	redox.heme	3	0.5633112142531305
29.2.1.2.2.82	protein.synthesis.ribosomal protein.eukaryotic.60S subunit.P2	1	0.5642681257268968
29.2.1.1.1.2.5	protein.synthesis.ribosomal protein.prokaryotic.chloroplast.50S subunit.L5	1	0.5647205348356983
26.3.5	misc.gluco-, galacto- and mannosidases.glycosyl hydrolase family 5	2	0.5648864356965184
17.1.1.1	hormone metabolism.abscisic acid.synthesis-degradation.synthesis	4	0.5660225091275077
17.1.1.1.10	hormone metabolism.abscisic acid.synthesis-degradation.synthesis.9-cis-epoxycarotenoid dioxygenase	4	0.5660225091275077
29.2.1.1.1.2.6	protein.synthesis.ribosomal protein.prokaryotic.chloroplast.50S subunit.L6	2	0.5679305905533809
11.10.1	lipid metabolism.glycolipid synthesis.MGDG synthase	1	0.5697085169165738
5.10	fermentation.aldehyde dehydrogenase	6	0.5701217435055501
26.27	misc.calcineurin-like phosphoesterase family protein	1	0.5719827091911112
29.3.4.3	protein.targeting.secretory pathway.vacuole	3	0.572480327493058
30.1	signalling.in sugar and nutrient physiology	17	0.576576258020125
29.2.1.1.3.1.15	protein.synthesis.ribosomal protein.prokaryotic.unknown organellar.30S subunit.S15	1	0.5795179973298592
2.2.1.5	major CHO metabolism.degradation.sucrose.Susy	2	0.5798610015970832
29.1.30	protein.aa activation.pseudouridylate synthase	3	0.5806602652712232
29.2.1.1.1.1.530	protein.synthesis.ribosomal protein.prokaryotic.chloroplast.30S subunit.S30A	1	0.5824991799402492
21.1	redox.thioredoxin	9	0.5855727047086332
13.1.6.1.10	amino acid metabolism.synthesis.aromatic aa.chorismate.dehydroquinate/shikimate dehydrogenase	1	0.5859478748508341
17.5	hormone metabolism.ethylene	71	0.5886265375220279
21.5	redox.peroxiredoxin	4	0.5947892015793665
29.2.1.1.1.2.21	protein.synthesis.ribosomal protein.prokaryotic.chloroplast.50S subunit.L21	1	0.5963503774032326
16.4.1	secondary metabolism.N misc.alkaloid-like	11	0.5982787492085979
18.5.2.7	Co-factor and vitamine metabolism.folate & vitamine K.DHNA Phytyltransferase	1	0.5989059487847008
29.2.1.1.3.2.17	protein.synthesis.ribosomal protein.prokaryotic.unknown organellar.50S subunit.L17	1	0.599371131060489
29.2.1.2.2.57	protein.synthesis.ribosomal protein.eukaryotic.60S subunit.L7A	2	0.600276365971137
29.3.4	protein.targeting.secretory pathway	9	0.6009374811288616
24.2	Biodegradation of Xenobiotics.lactoylglutathione lyase	3	0.6028265241325699
11.1.30	lipid metabolism.FA synthesis and FA elongation.pyruvate kinase	1	0.6035651155115782
8.1.1	TCA / org. transformation.TCA.pyruvate DH	3	0.6067377000076126
1.3.12	PS.calvin cycle.PRK	2	0.6077046571359672
13.2	amino acid metabolism.degradation	16	0.6125567774828586
11.9.3.3	lipid metabolism.lipid degradation.lysophospholipases.glycerophosphodiester phosphodiesterase	3	0.613236155459068
2.2.1.3.2	major CHO metabolism.degradation.sucrose.invertases.cell wall	2	0.6155065645099826
25.1	C1-metabolism.glycine hydroxymethyltransferase	1	0.6155190620432525
29.5.1	protein.degradation.subtilases	21	0.6174747645820055
29.2.1.2.2.99	protein.synthesis.ribosomal protein.eukaryotic.60S subunit.unknown	1	0.618582710318286
29.3.5	protein.targeting.peroxisomes	1	0.6190546315926451
29.2.1.1.1.2.4	protein.synthesis.ribosomal protein.prokaryotic.chloroplast.50S subunit.L4	1	0.6202351216931672
15.2	metal handling.binding, chelation and storage	23	0.621822451566602
16.5.99	secondary metabolism.sulfur-containing.misc	1	0.6218894525193454
16.5.99.1	secondary metabolism.sulfur-containing.misc.alliinase	1	0.6218894525193454
11.1.7	lipid metabolism.FA synthesis and FA elongation.ACP thioesterase	1	0.6223624700624659
27.3.32	RNA.regulation of transcription.WRKY domain transcription factor family	47	0.6226443541065478
23.1.3	nucleotide metabolism.synthesis.PRS-PP	1	0.6249668501918457
27.3.29	RNA.regulation of transcription.TCP transcription factor family	3	0.625776535700729
29.2.1.99.2	protein.synthesis.ribosomal protein.unknown.large subunit	3	0.627420353325334
34.2	transport.sugars	29	0.6285354689961431
8.1.1.1	TCA / org. transformation.TCA.pyruvate DH.E1	2	0.6327561959083463
29.2.1.2.1.9	protein.synthesis.ribosomal protein.eukaryotic.40S subunit.S9	2	0.6344418084873785
34	transport	365	0.6369135179777315
3.2.4	minor CHO metabolism.trehalose.trehalase	1	0.6387759778207144
13.1.3.5.3	amino acid metabolism.synthesis.aspartate family.lysine.LL-diaminopimelic acid aminotransferase	1	0.641409334706204
16.2.1	secondary metabolism.phenylpropanoids.lignin biosynthesis	17	0.6415468649401319
29.2.1.99.2.34	protein.synthesis.ribosomal protein.unknown.large subunit.L34	1	0.643807217836097
16.1.3	secondary metabolism.isoprenoids.tocopherol biosynthesis	7	0.6440382041860548
20.2.3	stress.abiotic.drought/salt	14	0.6444396135454595
17.7.1.2	hormone metabolism.jasmonate.synthesis-degradation.lipoxygenase	5	0.644776898270484
23.2.1.2	nucleotide metabolism.degradation.pyrimidine.uridine nucleosidase	1	0.6459684885304415
27.1.2	RNA.processing.RNA helicase	7	0.6468537372672726
23.3.3	nucleotide metabolism.salvage.NUDIX hydrolases	4	0.647603924811275
21.2.2	redox.ascorbate and glutathione.glutathione	5	0.6477872091912512
29.2.1.2.2.24	protein.synthesis.ribosomal protein.eukaryotic.60S subunit.L24	1	0.6486141042167006
11.8.10	lipid metabolism.'exotics' (steroids, squalene etc).phosphatidylcholinesterol O-acyltransferase	3	0.6497902916089631
27.3.55	RNA.regulation of transcription.HDA	1	0.6524701947191784
2.2	major CHO metabolism.degradation	19	0.6532070323830002
27.3.5	RNA.regulation of transcription.ARR	3	0.6536896498887627
29.3.3	protein.targeting.chloroplast	7	0.6542342702063149
30.10	signalling.phosphorelay	2	0.6548150866116784
27	RNA	700	0.6567198308121108
29.5.11.2	protein.degradation.ubiquitin.E1	1	0.6575454289620203
29.2.1.1.1.2.15	protein.synthesis.ribosomal protein.prokaryotic.chloroplast.50S subunit.L15	1	0.659240703258529
8	TCA / org. transformation	12	0.6604678434125658
13.1.4	amino acid metabolism.synthesis.branched chain group	3	0.6630585577439926
13.1.6.5.1	amino acid metabolism.synthesis.aromatic aa.tryptophan.anthranilate synthase	1	0.6631221839810815
30.2.11	signalling.receptor kinases.leucine rich repeat XI	55	0.6677737538816991
29.2.1.1.1.2.11	protein.synthesis.ribosomal protein.prokaryotic.chloroplast.50S subunit.L11	1	0.6696926912114147
34.13	transport.peptides and oligopeptides	37	0.671479903364196
26.26	misc.aminotransferases	1	0.6731096393268827
26.26.1	misc.aminotransferases.aminotransferase class IV family protein	1	0.6731096393268827
11.3.8	lipid metabolism.Phospholipid synthesis.phosphatidylserine decarboxylase	1	0.676043835884252
30.2.24	signalling.receptor kinases.S-locus glycoprotein like	89	0.6777286558156086
16.1.2.3	secondary metabolism.isoprenoids.mevalonate pathway.HMG-CoA reductase	1	0.6787378466541997
11.3.7	lipid metabolism.Phospholipid synthesis.cyclopropane-fatty-acyl-phospholipid synthase	1	0.6792281093805075
27.3.60	RNA.regulation of transcription.NIN-like bZIP-related family	1	0.6794732916522043
16.1.2.7	secondary metabolism.isoprenoids.mevalonate pathway.isopentenyl pyrophosphate:dimethyllallyl pyrophosphate isomerase	1	0.6819269755830873
29.2.1.99.2.39	protein.synthesis.ribosomal protein.unknown.large subunit.L39	1	0.6836465596730283
33.3	development.squamosa promoter binding like (SPL)	11	0.6841314421016406
1.1.4.9	PS.lightreaction.ATP synthase.subunit B_ (ATPX)	1	0.6846299170949837
26.17	misc.dynamin	4	0.6856937070282786
23.4.3	nucleotide metabolism.phosphotransfer and pyrophosphatases.uridylate kinase	1	0.6865982350070086
23.1.2.4	nucleotide metabolism.synthesis.purine.FGAR amidotransferase	1	0.6925159068534353
34.1	transport.p- and v-ATPases	5	0.6965969863143591
34.23	transport.hormones	1	0.6977093248983248
34.23.1	transport.hormones.auxin	1	0.6977093248983248
1.3.7	PS.calvin cycle.FBPase	3	0.6993330777711213
27.3.80	RNA.regulation of transcription.zf-HD	5	0.6996993074989141
11.10.2	lipid metabolism.glycolipid synthesis.DGDG synthase	1	0.700931426682692
29.2.1.2.2.32	protein.synthesis.ribosomal protein.eukaryotic.60S subunit.L32	1	0.703165272459846
34.11	transport.NDP-sugars at the ER	1	0.7031652724598461
13.1.1.3.1	amino acid metabolism.synthesis.central amino acid metabolism.alanine.alanine aminotransferase	2	0.7033416613093233
34.22	transport.cyclic nucleotide or calcium regulated channels	2	0.7072094009221692
19.13	tetrapyrrole synthesis.divinyl chlorophyllide-a 8-vinyl-reductase	1	0.7073917446852545
30.8	signalling.misc	2	0.7080894918620539
27.2	RNA.transcription	19	0.7094359309877444
29.5.11.4.4	protein.degradation.ubiquitin.E3.APC	1	0.7103805843246663
8.2.10	TCA / org. transformation.other organic acid transformaitons.malic	3	0.710528062705031
29.2.1.1.1.2.29	protein.synthesis.ribosomal protein.prokaryotic.chloroplast.50S subunit.L29	1	0.7166216131633893
30.1.2	signalling.in sugar and nutrient physiology.pyruvate dehydrogenase kinase	1	0.7173718198283476
29.2.1.1.3.2.32	protein.synthesis.ribosomal protein.prokaryotic.unknown organellar.50S subunit.L32	1	0.7188730506438231
13.1.5.1.2	amino acid metabolism.synthesis.serine-glycine-cysteine group.serine.phosphoserine aminotransferase	1	0.7208763795174882
29.2.1.2.1.53	protein.synthesis.ribosomal protein.eukaryotic.40S subunit.S3A	1	0.722630865597584
23.1.2.3	nucleotide metabolism.synthesis.purine.GAR transformylase	1	0.7268978204240563
31.4	cell.vesicle transport	34	0.7279290816819171
27.3.66	RNA.regulation of transcription.Psudo ARR transcription factor family	1	0.7296633216746287
29.3.4.1	protein.targeting.secretory pathway.ER	1	0.7309215335621534
27.3.4	RNA.regulation of transcription.ARF, Auxin Response Factor family	5	0.7340330555333316
2.1.1.2	major CHO metabolism.synthesis.sucrose.SPP	1	0.7372233955119255
29.2.1.1.1.2.9	protein.synthesis.ribosomal protein.prokaryotic.chloroplast.50S subunit.L9	1	0.7372233955119256
29.2.1.2.2.35	protein.synthesis.ribosomal protein.eukaryotic.60S subunit.L35	1	0.7377283150568924
29.2.1.2.2.535	protein.synthesis.ribosomal protein.eukaryotic.60S subunit.L35A	2	0.7443176324834325
27.1.1	RNA.processing.splicing	6	0.7448662020019574
27.1	RNA.processing	53	0.7462253357410249
3.1.2.2	minor CHO metabolism.raffinose family.raffinose synthases.putative	1	0.7470895316823324
27.3.48	RNA.regulation of transcription.FHA transcription factor	3	0.7471143715041513
11.9.4.3	lipid metabolism.lipid degradation.beta-oxidation.enoyl CoA hydratase	2	0.7482602834528378
29.2.1.2.2.31	protein.synthesis.ribosomal protein.eukaryotic.60S subunit.L31	1	0.7519112807590808
20.2.2	stress.abiotic.cold	3	0.7522433738910275
11.1.13	lipid metabolism.FA synthesis and FA elongation.acyl-CoA binding protein	2	0.753467473533729
13.1.5.3.2	amino acid metabolism.synthesis.serine-glycine-cysteine group.cysteine.SAT	3	0.7551791683210944
23.1.1.2	nucleotide metabolism.synthesis.pyrimidine.aspartate transcarbamoylase	1	0.7552159734167065
2.2.1.1	major CHO metabolism.degradation.sucrose.fructokinase	2	0.7576053149917605
29.2.1.1.1.2.3	protein.synthesis.ribosomal protein.prokaryotic.chloroplast.50S subunit.L3	1	0.7587798883799131
11	lipid metabolism	127	0.7592362649356499
17.6.3	hormone metabolism.gibberelin.induced-regulated-responsive-activated	3	0.7610613386065661
2.2.2.10	major CHO metabolism.degradation.starch.laforin like phosphoglucan phosphatase (SEX4)	1	0.7623489351900085
11.1.12	lipid metabolism.FA synthesis and FA elongation.ACP protein	2	0.7624716505912739
16.1.2.8	secondary metabolism.isoprenoids.mevalonate pathway.geranyl diphosphate synthase	1	0.763369595494536
29.2.1.2.1.14	protein.synthesis.ribosomal protein.eukaryotic.40S subunit.S14	1	0.7651567401079007
13.1.6.1.1	amino acid metabolism.synthesis.aromatic aa.chorismate.3-deoxy-D-arabino-heptulosonate 7-phosphate synthase	1	0.7654121488265002
29.2.1.1.3	protein.synthesis.ribosomal protein.prokaryotic.unknown organellar	14	0.7675026411809104
16.1.2.5	secondary metabolism.isoprenoids.mevalonate pathway.phosphomevalonate kinase	1	0.7715495504595459
30.2.25	signalling.receptor kinases.wall associated kinase	7	0.7720358861736484
17.3.1.2.8	hormone metabolism.brassinosteroid.synthesis-degradation.sterols.DWF1	1	0.776162026144914
34.10	transport.nucleotides	9	0.7775320056572165
1.3.11	PS.calvin cycle.RPE	1	0.7792414125264258
27.3.26	RNA.regulation of transcription.MYB-related transcription factor family	9	0.7817279747094652
29.5.11.3	protein.degradation.ubiquitin.E2	9	0.7830994706971287
19.99	tetrapyrrole synthesis.unspecified	1	0.7841241834964522
10.8.2	cell wall.pectin*esterases.acetyl esterase	2	0.7847568323575913
2.1.2.2	major CHO metabolism.synthesis.starch.starch synthase	2	0.7851207103078854
2	major CHO metabolism	29	0.7872007588310171
26.24	misc.GCN5-related N-acetyltransferase	9	0.7881626590718822
29.2.1.1.3.2.35	protein.synthesis.ribosomal protein.prokaryotic.unknown organellar.50S subunit.L35	2	0.7898553700107742
29.2.1.2.1.21	protein.synthesis.ribosomal protein.eukaryotic.40S subunit.S21	1	0.7936570039284917
29.2.1.2.1.29	protein.synthesis.ribosomal protein.eukaryotic.40S subunit.S29	2	0.7942327261120489
29.2.1.2.2.80	protein.synthesis.ribosomal protein.eukaryotic.60S subunit.P0	1	0.7946894559206875
26.22	misc.short chain dehydrogenase/reductase (SDR)	33	0.7950039458638253
27.3.14	RNA.regulation of transcription.CCAAT box binding factor family, HAP2	1	0.7962388079094784
18.5.2.10	2-phytyl-1,4-naphthoquinone methyltransferase.PHYLLO	1	0.7964971115281245
13	amino acid metabolism	71	0.7978156198806525
16.1.3.5	secondary metabolism.isoprenoids.tocopherol biosynthesis.tocopherol methyltransferase	1	0.7980474005052972
29.2.2.50	protein.synthesis.misc ribosomal protein.BRIX	1	0.8003743261576388
16.2.1.7	secondary metabolism.phenylpropanoids.lignin biosynthesis.CCR1	2	0.803006775975069
27.3.35	RNA.regulation of transcription.bZIP transcription factor family	23	0.8047990553049345
29.2.1.2.1.18	protein.synthesis.ribosomal protein.eukaryotic.40S subunit.S18	1	0.8058106803863282
16.2.1.6	secondary metabolism.phenylpropanoids.lignin biosynthesis.CCoAOMT	1	0.8060697908993959
13.1.3.6.1.1	amino acid metabolism.synthesis.aspartate family.misc.homoserine.aspartate kinase	4	0.8065605921541776
1.3.5	PS.calvin cycle.TPI	1	0.8068472500776687
11.1.8	lipid metabolism.FA synthesis and FA elongation.acyl coa ligase	4	0.8085051803527845
26.7	misc.oxidases - copper, flavone etc.	35	0.8096609731506188
29.2.1.2.1.4	protein.synthesis.ribosomal protein.eukaryotic.40S subunit.S4	1	0.8107373944958809
21.2.1	redox.ascorbate and glutathione.ascorbate	7	0.8122080292969449
27.3.27	RNA.regulation of transcription.NAC domain transcription factor family	5	0.8137680452346099
29.2.2	protein.synthesis.misc ribosomal protein	2	0.8141929214316023
23.4.1	nucleotide metabolism.phosphotransfer and pyrophosphatases.adenylate kinase	1	0.8143724200288773
29.3	protein.targeting	32	0.8166883272607894
20.2.4	stress.abiotic.touch/wounding	2	0.8167656776628629
29.2	protein.synthesis	117	0.8171206743577413
14.5	S-assimilation.sulfite oxidase	1	0.8195722359687636
19.10	tetrapyrrole synthesis.magnesium chelatase	2	0.8209966259098052
29.2.1.2.2.537	protein.synthesis.ribosomal protein.eukaryotic.60S subunit.L37A	1	0.8224355355935129
27.3.71	RNA.regulation of transcription.SNF7	1	0.8245194239305504
27.3.39	RNA.regulation of transcription.AtSR Transcription Factor family	2	0.8259700359335311
27.3	RNA.regulation of transcription	605	0.8288688626911672
17.4	hormone metabolism.cytokinin	3	0.8291673118269551
8.1.1.3	TCA / org. transformation.TCA.pyruvate DH.E3	1	0.8292126759858154
30.4.5	signalling.phosphinositides.inositol-1,3,4-trisphosphate 5/6-kinase	1	0.8313005344740665
29.2.1.1.1.1.20	protein.synthesis.ribosomal protein.prokaryotic.chloroplast.30S subunit.S20	1	0.8357411713678033
13.1	amino acid metabolism.synthesis	52	0.8370951507184801
16.1.4.1	secondary metabolism.isoprenoids.carotenoids.phytoene synthase	2	0.8381563061116681
27.3.54	RNA.regulation of transcription.Histone acetyltransferases	2	0.8388961482585192
34.19	transport.Major Intrinsic Proteins	16	0.8390253896461514
30.2.19	signalling.receptor kinases.legume-lectin	6	0.8401294580697583
1.2.2	PS.photorespiration.glycolate oxydase	2	0.8403762591522143
13.2.3	amino acid metabolism.degradation.aspartate family	5	0.8427009197053418
15	metal handling	27	0.8444372891009766
29.2.1.1.1.2.18	protein.synthesis.ribosomal protein.prokaryotic.chloroplast.50S subunit.L18	1	0.8454240200025203
29.2.1.1.1.2.10	protein.synthesis.ribosomal protein.prokaryotic.chloroplast.50S subunit.L10	1	0.8456860498929384
17.3.1.2	hormone metabolism.brassinosteroid.synthesis-degradation.sterols	4	0.8528773805845029
20.1	stress.biotic	345	0.8557615321686556
1.1.5.4	PS.lightreaction.other electron carrier (ox/red).ferredoxin oxireductase	3	0.8578975627290362
34.16	transport.ABC transporters and multidrug resistance systems	34	0.8580956446347382
29.2.1.1.3.2.30	protein.synthesis.ribosomal protein.prokaryotic.unknown organellar.50S subunit.L30	1	0.8585458695122907
16.2.1.1	secondary metabolism.phenylpropanoids.lignin biosynthesis.PAL	7	0.8591375885917047
13.1.1.1.1	amino acid metabolism.synthesis.central amino acid metabolism.GABA.Glutamate decarboxylase	1	0.8595973578835139
11.10.4	lipid metabolism.glycolipid synthesis.sulfolipid synthase	1	0.8611750568112853
29.2.1.1.2.1.11	protein.synthesis.ribosomal protein.prokaryotic.mitochondrion.30S subunit.S11	1	0.8622271643462479
29.2.1.2.2.37	protein.synthesis.ribosomal protein.eukaryotic.60S subunit.L37	1	0.8635426423319335
1.3.3	PS.calvin cycle.phosphoglycerate kinase	1	0.8648584987226853
29.2.1.2.1.5	protein.synthesis.ribosomal protein.eukaryotic.40S subunit.S5	1	0.8656481927035408
29.2.1.2.1.25	protein.synthesis.ribosomal protein.eukaryotic.40S subunit.S25	1	0.8672279823860668
27.3.10	RNA.regulation of transcription.C2C2(Zn) YABBY family	2	0.8687860741066069
2.2.2.8	major CHO metabolism.degradation.starch.ISA3	1	0.8693351927312192
2.1	major CHO metabolism.synthesis	10	0.8730526339230913
29.5	protein.degradation	336	0.876504787684083
11.9.3.1	lipid metabolism.lipid degradation.lysophospholipases.phospholipase D	5	0.8796356500828826
7.1.3	OPP.oxidative PP.6-phosphogluconate dehydrogenase	1	0.8801488988631955
34.14	transport.unspecified cations	10	0.8806489748430852
34.98	transport.membrane system unknown	2	0.8814695335061128
2.1.2.1	major CHO metabolism.synthesis.starch.AGPase	4	0.8819804529325181
23.1.2.9	nucleotide metabolism.synthesis.purine.AICAR transformylase	1	0.8825257064850435
25.8	C1-metabolism.tetrahydrofolate synthase	1	0.8843750673051869
29.2.1.2.2.83	protein.synthesis.ribosomal protein.eukaryotic.60S subunit.P3	1	0.8846393133854077
29.1	protein.aa activation	15	0.8870501379450721
30	signalling	456	0.8879023187356343
29.2.1.2.2.34	protein.synthesis.ribosomal protein.eukaryotic.60S subunit.L34	3	0.8897182410869409
26	misc	707	0.890262820254907
29.2.1.2.2.11	protein.synthesis.ribosomal protein.eukaryotic.60S subunit.L11	1	0.8909850023287408
29.7	protein.glycosylation	15	0.8912866920465261
20.1.3	stress.biotic.signalling	5	0.8920492630696546
20.1.3.1	stress.biotic.signalling.MLO-like	5	0.8920492630696546
29.1.10	protein.aa activation.methionine-tRNA ligase	1	0.8925725324679323
27.3.1	RNA.regulation of transcription.ABI3/VP1-related B3-domain-containing transcription factor family	3	0.8936903344808474
2.2.1.4	major CHO metabolism.degradation.sucrose.hexokinase	2	0.9014877816017037
11.8.2	lipid metabolism.''exotics'' (steroids, squalene etc).methylsterol monooxygenase	2	0.9022374247263003
17.3.1	hormone metabolism.brassinosteroid.synthesis-degradation	5	0.9050823826066781
30.2.12	signalling.receptor kinases.leucine rich repeat XII	13	0.9052531707969105
8.2.9	TCA / org. transformation.other organic acid transformaitons.cyt MDH	1	0.906613702514969
29.2.3	protein.synthesis.initiation	9	0.9083467727402845
12.4	N-metabolism.misc	1	0.9111238788039975
13.1.3.5.2	amino acid metabolism.synthesis.aspartate family.lysine.dihydrodipicolinate reductase	2	0.9127412809587836
11.1.10	lipid metabolism.FA synthesis and FA elongation.beta ketoacyl CoA synthase	10	0.9129847578104853
23.5.2	nucleotide metabolism.deoxynucleotide metabolism.pseudouridine synthase	1	0.9148402994843684
18.6	Co-factor and vitamine metabolism.biotin	1	0.9159024796136117
17.3.1.1	hormone metabolism.brassinosteroid.synthesis-degradation.BRs	1	0.916964809914768
17.3.1.1.1	hormone metabolism.brassinosteroid.synthesis-degradation.BRs.DET2	1	0.916964809914768
30.6	signalling.MAP kinases	7	0.9172070787586621
10.1.30	cell wall.precursor synthesis.sugar kinases	1	0.9177616550581844
10.1.30.2	ell wall.precursor synthesis.sugar kinases.arabinose-1-kinase	1	0.9177616550581844
29.2.1.1.1.2.31	protein.synthesis.ribosomal protein.prokaryotic.chloroplast.50S subunit.L31	1	0.9182929311016141
29.2.1.2.2.22	protein.synthesis.ribosomal protein.eukaryotic.60S subunit.L22	1	0.9185585828193538
17.5.1.1	hormone metabolism.ethylene.synthesis-degradation.1-aminocyclopropane-1-carboxylate synthase	1	0.9196212803100221
13.1.6	amino acid metabolism.synthesis.aromatic aa	16	0.9207597286904301
29.3.4.4	protein.targeting.secretory pathway.plasma membrane	2	0.9217568063935258
29.1.3	protein.aa activation.threonine-tRNA ligase	1	0.923076028968473
29.2.1.1.1.1.83	protein.synthesis.ribosomal protein.prokaryotic.chloroplast.30S subunit.PSRP3	1	0.9270640772592993
29.2.1.2.2.7	protein.synthesis.ribosomal protein.eukaryotic.60S subunit.L7	1	0.9270640772592993
10.1.10	cell wall.precursor synthesis.UDP-glucose 4,6-dehydratase	1	0.9286598154538492
10.1.11	cell wall.precursor synthesis.UER	1	0.9286598154538492
1.2.4.1	PS.photorespiration.glycine cleavage.P subunit	1	0.9350455736568368
29.2.1.1.1.2.13	protein.synthesis.ribosomal protein.prokaryotic.chloroplast.50S subunit.L13	1	0.9363764799047325
29.2.1.1.1.2.1	protein.synthesis.ribosomal protein.prokaryotic.chloroplast.50S subunit.L1	1	0.9371751092352214
27.3.52	RNA.regulation of transcription.Global transcription factor group	7	0.9394293155924902
23.1.1.5	nucleotide metabolism.synthesis.pyrimidine.orotate phosphoribosyltransferase	1	0.940370250637755
30.2.20	signalling.receptor kinases.wheat LRK10 like	1	0.9409028689317803
16.1.3.2	secondary metabolism.isoprenoids.tocopherol biosynthesis.homogentisate phytyltransferase	2	0.9481053633656795
31.5.1	cell.cell death.plants	4	0.9482214536430078
11.5	lipid metabolism.glyceral metabolism	1	0.9491616857083522
11.5.2	lipid metabolism.glyceral metabolism.Glycerol-3-phosphate dehydrogenase (NAD+)	1	0.9491616857083522
4.1.13	glycolysis.cytosolic branch.enolase	1	0.9499612302374149
29.3.4.99	protein.targeting.secretory pathway.unspecified	3	0.9501502333989327
29.1.18	protein.aa activation.glutamine-tRNA ligase	1	0.9504942879632792
20.1.1	stress.biotic.respiratory burst	5	0.953977243605305
29.2.1.2.2.27	protein.synthesis.ribosomal protein.eukaryotic.60S subunit.L27	1	0.9550261490890446
26.8	misc.nitrilases, *nitrile lyases, berberine bridge enzymes, reticuline oxidases, troponine reductases	29	0.9557039916452721
24.1	Biodegradation of Xenobiotics.hydroxyacylglutathione hydrolase	2	0.9579079969901885
16.8.3	secondary metabolism.flavonoids.dihydroflavonols	8	0.9588389929246852
1.1.4.7	PS.lightreaction.ATP synthase.delta chain	1	0.9598261724385584
29.2.1.2.1.10	protein.synthesis.ribosomal protein.eukaryotic.40S subunit.S10	1	0.960359601474722
29.2.1.1.1.2.19	protein.synthesis.ribosomal protein.prokaryotic.chloroplast.50S subunit.L19	1	0.9616932511894916
4.2.3	glycolysis.plastid branch.glucose-6-phosphate isomerase	1	0.9632937720189614
9.4	mitochondrial electron transport / ATP synthesis.alternative oxidase	2	0.9637550000318129
29.2.4	protein.synthesis.elongation	7	0.9638167585982378
16.1.4.6	secondary metabolism.isoprenoids.carotenoids.carotenoid beta ring hydroxylase	2	0.9639436471824584
34.1.1	transport.p- and v-ATPases.H+-transporting two-sector ATPase	1	0.964627652646968
34.1.1.4	transport.p- and v-ATPases.H+-transporting two-sector ATPase.subunit E	1	0.964627652646968
13.1.2	amino acid metabolism.synthesis.glutamate family	2	0.9650755721027571
17.6.1.11	hormone metabolism.gibberelin.synthesis-degradation.GA20 oxidase	3	0.9666264132907023
13.1.6.4.1	amino acid metabolism.synthesis.aromatic aa.tyrosine.arogenate dehydrogenase \& prephenate dehydrogenase	1	0.9699641278312838
13.1.6.4.2	amino acid metabolism.synthesis.aromatic aa.tyrosine.prephenate dehydrogenase	1	0.9699641278312838
19.21	tetrapyrrole synthesis.heme oxygenase	2	0.9714910758107133
29.5.11	protein.degradation.ubiquitin	178	0.9715791450581179
30.2.17	signalling.receptor kinases.DUF 26	8	0.9729930618818357
30.2.6	signalling.receptor kinases.leucine rich repeat VI	1	0.9731666739291335
29.5.11.4.1	protein.degradation.ubiquitin.E3.HECT	1	0.9742342879958479
22	polyamine metabolism	2	0.9780971940279247
22.1	polyamine metabolism.synthesis	2	0.9780971940279247
26.18	misc.invertase/pectin methylesterase inhibitor family protein	11	0.979097819282727
16.1.1.10	secondary metabolism.isoprenoids.non-mevalonate pathway.geranylgeranyl pyrophosphate synthase	3	0.9857376765533026
27.3.7	RNA.regulation of transcription.C2C2(Zn) CO-like, Constans-like zinc finger family	13	0.990032606958364
26.10	misc.cytochrome P450	115	0.9904221574030151
